# Supplementary material for: Human genetic analyses of organelles highlight the nucleus in age-related trait heritability
Source: eLife. 2021 Sep 1;10:e68610. doi: 10.7554/eLife.68610 (PMC8476128; doi:10.7554/eLife.68610)
Supplement: Figure 1—source data 1. [file elife-68610-fig1-data1.xlsx]

## Sheet: Sheet1
Gupta et al. 2021 Figure 1-Source data 1: Genetic and phenotypic correlation point estimates and standard errors.
Trait1	Trait2	rg	rg_se	rg_z	rg_p	rp	rp_p
Triglycerides	Type 2 Diabetes Mellitus	0.4427	0.0477	9.2796	1.7014e-20	0.0808177	2.2e-16
Systolic BP	Type 2 Diabetes Mellitus	0.2987	0.0239	12.5004	7.4232e-36	0.0409107	2.2e-16
Systolic BP	Triglycerides	0.1158	0.0259	4.4656	7.9836e-06	0.190239	2.2e-16
Raised Total Cholesterol	Type 2 Diabetes Mellitus	0.4833	0.0546	8.8458	9.0873e-19	0.194691	2.2e-16
Raised Total Cholesterol	Triglycerides	0.6409	0.0556	11.5278	9.5542e-31	0.17201	2.2e-16
Raised Total Cholesterol	Systolic BP	0.4216	0.0326	12.9269	3.1748e-38	0.161848	2.2e-16
Primary Skin Malignancy	Type 2 Diabetes Mellitus	-0.1296	0.0409	-3.1652	0.0015	0.00674112	0.0289242
Primary Skin Malignancy	Triglycerides	-0.1187	0.036	-3.2993	0.001	0.00681293	0.0337456
Primary Skin Malignancy	Systolic BP	-0.0332	0.0304	-1.0931	0.2743	0.0643939	2.2e-16
Primary Skin Malignancy	Raised Total Cholesterol	-0.0724	0.044	-1.6471	0.0995	0.0658206	2.2e-16
Parkinson's Disease	Type 2 Diabetes Mellitus	-0.0731	0.0423	-1.7274	0.0841	NA	NA
Parkinson's Disease	Triglycerides	-0.054	0.0359	-1.5046	0.1324	NA	NA
Parkinson's Disease	Systolic BP	-0.0196	0.0278	-0.7058	0.4803	NA	NA
Parkinson's Disease	Raised Total Cholesterol	-0.0928	0.0458	-2.0276	0.0426	NA	NA
Parkinson's Disease	Primary Skin Malignancy	0.0412	0.0557	0.741	0.4587	NA	NA
Osteoporosis/BMD	Type 2 Diabetes Mellitus	0.0736	0.0269	2.7385	0.0062	0.0267873	2.2e-16
Osteoporosis/BMD	Triglycerides	0.0192	0.0329	0.5826	0.5602	0.0443791	2.2e-16
Osteoporosis/BMD	Systolic BP	0.0415	0.0297	1.3955	0.1629	0.0315996	2.2e-16
Osteoporosis/BMD	Raised Total Cholesterol	-0.0053	0.0282	-0.1893	0.8498	-0.00808013	0.0119738
Osteoporosis/BMD	Primary Skin Malignancy	0.0371	0.0361	1.0276	0.3041	-0.00887657	0.0294815
Osteoporosis/BMD	Parkinson's Disease	0.053	0.0295	1.7942	0.0728	NA	NA
Osteoarthritis	Type 2 Diabetes Mellitus	0.3868	0.0413	9.367	7.4633e-21	0.0420939	2.2e-16
Osteoarthritis	Triglycerides	0.2007	0.0384	5.2309	1.6865e-07	0.096577	2.2e-16
Osteoarthritis	Systolic BP	0.0753	0.0331	2.2762	0.0228	0.0835273	2.2e-16
Osteoarthritis	Raised Total Cholesterol	0.2426	0.0522	4.6449	3.4024e-06	0.154719	2.2e-16
Osteoarthritis	Primary Skin Malignancy	0.004	0.0627	0.063	0.9497	0.0571255	2.2e-16
Osteoarthritis	Parkinson's Disease	-0.1094	0.0505	-2.1653	0.0304	NA	NA
Osteoarthritis	Osteoporosis/BMD	0.0673	0.0384	1.755	0.0793	-0.0453407	2.2e-16
Myocardial Infarction	Type 2 Diabetes Mellitus	0.4128	0.0456	9.0448	1.4993e-19	0.128999	2.2e-16
Myocardial Infarction	Triglycerides	0.3198	0.0432	7.3952	1.4122e-13	0.120825	2.2e-16
Myocardial Infarction	Systolic BP	0.33	0.037	8.9079	5.2004e-19	0.0509364	2.2e-16
Myocardial Infarction	Raised Total Cholesterol	0.5642	0.0445	12.6661	9.1078e-37	0.303815	2.2e-16
Myocardial Infarction	Primary Skin Malignancy	-0.1561	0.0503	-3.1017	0.0019	0.0310811	0.000276567
Myocardial Infarction	Parkinson's Disease	-0.0031	0.0572	-0.0537	0.9572	NA	NA
Myocardial Infarction	Osteoporosis/BMD	-0.0022	0.0313	-0.0716	0.9429	0.0210684	7.80082e-05
Myocardial Infarction	Osteoarthritis	0.3007	0.0612	4.9124	8.9946e-07	0.0622017	2.2e-16
LDL-C	Type 2 Diabetes Mellitus	-0.141	0.0536	-2.6304	0.0085	-0.239099	2.2e-16
LDL-C	Triglycerides	0.4625	0.1901	2.4333	0.015	0.279729	2.2e-16
LDL-C	Systolic BP	-0.2295	0.0846	-2.7116	0.0067	0.104622	2.2e-16
LDL-C	Raised Total Cholesterol	0.5574	0.074	7.5348	4.8896e-14	-0.380121	2.2e-16
LDL-C	Primary Skin Malignancy	0.0594	0.061	0.9737	0.3302	-0.00909167	0.00701408
LDL-C	Parkinson's Disease	-0.0477	0.0521	-0.9142	0.3606	NA	NA
LDL-C	Osteoporosis/BMD	-0.036	0.0353	-1.0194	0.308	-0.0374432	2.2e-16
LDL-C	Osteoarthritis	0.0635	0.0625	1.0155	0.3099	0.0130065	1.03683e-05
LDL-C	Myocardial Infarction	0.0133	0.082	0.1625	0.8709	-0.241345	2.2e-16
Hypertension	Type 2 Diabetes Mellitus	0.458	0.0248	18.4405	6.2215e-76	0.21801	2.2e-16
Hypertension	Triglycerides	0.2318	0.0301	7.7127	1.2321e-14	0.189941	2.2e-16
Hypertension	Systolic BP	0.793	0.0124	64.012	0	0.405478	2.2e-16
Hypertension	Raised Total Cholesterol	0.5709	0.0329	17.3452	2.1456e-67	0.505969	2.2e-16
Hypertension	Primary Skin Malignancy	-0.0265	0.0346	-0.7643	0.4447	0.0708039	2.2e-16
Hypertension	Parkinson's Disease	-0.027	0.0312	-0.863	0.3882	NA	NA
Hypertension	Osteoporosis/BMD	0.0479	0.0307	1.5592	0.1189	0.00362238	0.111632
Hypertension	Osteoarthritis	0.2073	0.0382	5.4207	5.9359e-08	0.154025	2.2e-16
Hypertension	Myocardial Infarction	0.4567	0.0336	13.5736	5.7393e-42	0.2685	2.2e-16
Hypertension	LDL-C	-0.2696	0.1035	-2.6047	0.0092	-0.188144	2.2e-16
HDL-C	Type 2 Diabetes Mellitus	-0.4688	0.0343	-13.6482	2.0698e-42	-0.163011	2.2e-16
HDL-C	Triglycerides	-0.6376	0.0552	-11.5438	7.9324e-31	-0.493611	2.2e-16
HDL-C	Systolic BP	-0.1052	0.0184	-5.7251	1.034e-08	-0.0430631	2.2e-16
HDL-C	Raised Total Cholesterol	-0.2331	0.0463	-5.0301	4.9029e-07	-0.178187	2.2e-16
HDL-C	Primary Skin Malignancy	0.1014	0.0297	3.4081	0.0007	0.00194548	0.307413
HDL-C	Parkinson's Disease	0.0602	0.0293	2.0536	0.04	NA	NA
HDL-C	Osteoporosis/BMD	-0.057	0.0199	-2.8664	0.0042	-0.131949	2.2e-16
HDL-C	Osteoarthritis	-0.2361	0.0363	-6.5017	7.9436e-11	-0.0152605	9.99665e-07
HDL-C	Myocardial Infarction	-0.3346	0.0396	-8.448	2.9637e-17	-0.272145	2.2e-16
HDL-C	LDL-C	0.2842	0.1467	1.9365	0.0528	0.124738	2.2e-16
HDL-C	Hypertension	-0.2655	0.0233	-11.3824	5.1154e-30	-0.180991	2.2e-16
Glucose	Type 2 Diabetes Mellitus	0.5226	0.0692	7.5481	4.4178e-14	0.281971	2.2e-16
Glucose	Triglycerides	0.1491	0.0444	3.3559	0.0008	0.108418	2.2e-16
Glucose	Systolic BP	0.2967	0.0281	10.5526	4.939e-26	0.174798	2.2e-16
Glucose	Raised Total Cholesterol	0.1885	0.0467	4.0377	5.3973e-05	0.163951	2.2e-16
Glucose	Primary Skin Malignancy	-0.1072	0.0363	-2.9544	0.0031	0.0193001	3.39183e-07
Glucose	Parkinson's Disease	0.0301	0.0359	0.8387	0.4016	NA	NA
Glucose	Osteoporosis/BMD	-0.0155	0.0218	-0.7086	0.4786	-0.0219065	2.2e-16
Glucose	Osteoarthritis	0.1421	0.0442	3.2147	0.0013	0.0582129	2.2e-16
Glucose	Myocardial Infarction	0.1093	0.0379	2.8843	0.0039	0.097009	2.2e-16
Glucose	LDL-C	-0.0827	0.049	-1.6893	0.0912	-0.0379092	2.2e-16
Glucose	Hypertension	0.2375	0.0322	7.3731	1.6676e-13	0.196116	2.2e-16
Glucose	HDL-C	-0.1755	0.0332	-5.2857	1.2521e-07	-0.0493098	2.2e-16
GERD	Type 2 Diabetes Mellitus	0.3334	0.0604	5.5195	3.3997e-08	0.0305479	2.2e-16
GERD	Triglycerides	0.196	0.0442	4.4333	9.2783e-06	0.0799413	2.2e-16
GERD	Systolic BP	0.0166	0.0461	0.3597	0.7191	0.0221401	8.70185e-08
GERD	Raised Total Cholesterol	0.3738	0.0575	6.501	7.9775e-11	0.102661	2.2e-16
GERD	Primary Skin Malignancy	-0.028	0.0729	-0.3849	0.7003	0.0124348	0.0794622
GERD	Parkinson's Disease	0.0068	0.0707	0.0966	0.923	NA	NA
GERD	Osteoporosis/BMD	-0.075	0.0483	-1.554	0.1202	-0.0312259	5.77577e-09
GERD	Osteoarthritis	0.4333	0.0787	5.5077	3.6365e-08	0.118377	2.2e-16
GERD	Myocardial Infarction	0.3551	0.0791	4.4897	7.1317e-06	0.131153	2.2e-16
GERD	LDL-C	0.0227	0.0576	0.3941	0.6935	-0.00217471	0.302071
GERD	Hypertension	0.2234	0.0457	4.8876	1.021e-06	0.0949352	2.2e-16
GERD	HDL-C	-0.2432	0.0428	-5.6836	1.3186e-08	-0.0582369	2.2e-16
GERD	Glucose	0.1308	0.0471	2.7766	0.0055	0.0344968	1.86768e-15
eGFR	Type 2 Diabetes Mellitus	0.0194	0.0393	0.4939	0.6213	NA	NA
eGFR	Triglycerides	-0.0563	0.0396	-1.4212	0.1552	NA	NA
eGFR	Systolic BP	-0.0386	0.0298	-1.2962	0.1949	NA	NA
eGFR	Raised Total Cholesterol	-0.0648	0.04	-1.6202	0.1052	NA	NA
eGFR	Primary Skin Malignancy	0.0718	0.0405	1.7735	0.0762	NA	NA
eGFR	Parkinson's Disease	-0.0888	0.0467	-1.9009	0.0573	NA	NA
eGFR	Osteoporosis/BMD	-0.0176	0.0334	-0.5278	0.5977	NA	NA
eGFR	Osteoarthritis	0.0257	0.0529	0.4853	0.6275	NA	NA
eGFR	Myocardial Infarction	-0.0664	0.0448	-1.4817	0.1384	NA	NA
eGFR	LDL-C	0.0434	0.0536	0.8095	0.4182	NA	NA
eGFR	Hypertension	-0.0341	0.0312	-1.0925	0.2746	NA	NA
eGFR	HDL-C	0.0592	0.0297	1.9907	0.0465	NA	NA
eGFR	Glucose	0.0133	0.0335	0.3969	0.6915	NA	NA
eGFR	GERD	0.0135	0.0673	0.2007	0.8409	NA	NA
Diverticular Disease	Type 2 Diabetes Mellitus	0.1557	0.0399	3.9021	9.5381e-05	0.0526644	2.2e-16
Diverticular Disease	Triglycerides	0.1124	0.027	4.1629	3.1421e-05	0.0978547	2.2e-16
Diverticular Disease	Systolic BP	-0.0064	0.0321	-0.1983	0.8428	0.0727051	2.2e-16
Diverticular Disease	Raised Total Cholesterol	0.0948	0.0396	2.3943	0.0167	0.142468	2.2e-16
Diverticular Disease	Primary Skin Malignancy	-0.0203	0.0535	-0.3795	0.7043	0.0476491	2.10088e-09
Diverticular Disease	Parkinson's Disease	-0.0089	0.0496	-0.1792	0.8578	NA	NA
Diverticular Disease	Osteoporosis/BMD	0.0232	0.0318	0.7287	0.4662	-0.0207172	3.87517e-05
Diverticular Disease	Osteoarthritis	0.2977	0.058	5.1292	2.9095e-07	0.155961	2.2e-16
Diverticular Disease	Myocardial Infarction	0.1492	0.0543	2.7447	0.0061	0.141764	2.2e-16
Diverticular Disease	LDL-C	-0.0106	0.049	-0.2167	0.8285	-0.0246705	2.35525e-10
Diverticular Disease	Hypertension	0.1192	0.031	3.8512	0.0001	0.154805	2.2e-16
Diverticular Disease	HDL-C	-0.0823	0.0302	-2.7204	0.0065	-0.0528763	2.2e-16
Diverticular Disease	Glucose	0.0819	0.0352	2.3264	0.02	0.0508203	2.2e-16
Diverticular Disease	GERD	0.2252	0.0733	3.0722	0.0021	0.176682	2.2e-16
Diverticular Disease	eGFR	0.0781	0.049	1.5933	0.1111	NA	NA
Diastolic BP	Type 2 Diabetes Mellitus	0.2738	0.0275	9.9621	2.2318e-23	-0.026763	2.2e-16
Diastolic BP	Triglycerides	0.1443	0.0291	4.9601	7.0455e-07	0.19626	2.2e-16
Diastolic BP	Systolic BP	0.6699	0.0172	39.0074	0	0.705442	2.2e-16
Diastolic BP	Raised Total Cholesterol	0.3747	0.034	11.0103	3.4088e-28	0.0357981	2.2e-16
Diastolic BP	Primary Skin Malignancy	-0.0654	0.034	-1.9239	0.0544	-0.0134207	0.000166324
Diastolic BP	Parkinson's Disease	-0.0115	0.0328	-0.3487	0.7273	NA	NA
Diastolic BP	Osteoporosis/BMD	0.0487	0.0317	1.5355	0.1247	0.0661933	2.2e-16
Diastolic BP	Osteoarthritis	0.1605	0.04	4.0156	5.9294e-05	0.0148108	9.19997e-07
Diastolic BP	Myocardial Infarction	0.276	0.0428	6.4548	1.0839e-10	-0.0556437	2.2e-16
Diastolic BP	LDL-C	-0.1378	0.0504	-2.7318	0.0063	0.150105	2.2e-16
Diastolic BP	Hypertension	0.7762	0.0123	62.9397	0	0.307819	2.2e-16
Diastolic BP	HDL-C	-0.1833	0.0228	-8.0235	1.0275e-15	-0.0921497	2.2e-16
Diastolic BP	Glucose	0.1991	0.0345	5.7637	8.2297e-09	0.083325	2.2e-16
Diastolic BP	GERD	0.0627	0.048	1.3062	0.1915	0.0130272	0.00103733
Diastolic BP	eGFR	-0.0437	0.029	-1.5076	0.1317	NA	NA
Diastolic BP	Diverticular Disease	0.0642	0.0366	1.7529	0.0796	0.0216416	3.71562e-08
Diaphragmatic Hernia	Type 2 Diabetes Mellitus	0.3854	0.0732	5.2647	1.4045e-07	0.0345142	2.2e-16
Diaphragmatic Hernia	Triglycerides	0.235	0.0649	3.6227	0.0003	0.0724757	2.2e-16
Diaphragmatic Hernia	Systolic BP	0.0248	0.0583	0.4245	0.6712	0.0203861	7.15363e-06
Diaphragmatic Hernia	Raised Total Cholesterol	0.366	0.0889	4.1164	3.8476e-05	0.112987	2.2e-16
Diaphragmatic Hernia	Primary Skin Malignancy	-0.0328	0.0875	-0.3747	0.7078	0.0306763	0.000680171
Diaphragmatic Hernia	Parkinson's Disease	-0.025	0.0806	-0.3107	0.756	NA	NA
Diaphragmatic Hernia	Osteoporosis/BMD	-0.0762	0.0647	-1.1776	0.2389	-0.0411495	6.86342e-12
Diaphragmatic Hernia	Osteoarthritis	0.5046	0.0908	5.5563	2.7556e-08	0.144318	2.2e-16
Diaphragmatic Hernia	Myocardial Infarction	0.4175	0.0869	4.8055	1.5439e-06	0.104531	2.2e-16
Diaphragmatic Hernia	LDL-C	0.0807	0.1138	0.7092	0.4782	0.00029268	0.474791
Diaphragmatic Hernia	Hypertension	0.2361	0.0592	3.9872	6.6865e-05	0.111349	2.2e-16
Diaphragmatic Hernia	HDL-C	-0.2101	0.0531	-3.9584	7.5459e-05	-0.036783	2.93776e-14
Diaphragmatic Hernia	Glucose	0.0942	0.0748	1.2598	0.2077	0.0368851	1.63058e-14
Diaphragmatic Hernia	GERD	1.0489	0.1186	8.8457	9.092e-19	0.350345	2.2e-16
Diaphragmatic Hernia	eGFR	0.0828	0.0721	1.1478	0.251	NA	NA
Diaphragmatic Hernia	Diverticular Disease	0.4722	0.0816	5.7866	7.1838e-09	0.23202	2.2e-16
Diaphragmatic Hernia	Diastolic BP	0.1388	0.0614	2.2615	0.0237	0.0103187	0.0139516
Deafness	Type 2 Diabetes Mellitus	0.1638	0.0608	2.6935	0.0071	0.0368507	2.2e-16
Deafness	Triglycerides	0.1221	0.0401	3.042	0.0023	0.0305957	2.2e-16
Deafness	Systolic BP	0.0747	0.0415	1.8011	0.0717	0.0392042	2.2e-16
Deafness	Raised Total Cholesterol	0.2648	0.0581	4.5565	5.2002e-06	0.0669336	2.2e-16
Deafness	Primary Skin Malignancy	-0.1243	0.0681	-1.8244	0.0681	0.0353728	2.2e-16
Deafness	Parkinson's Disease	0.0311	0.0649	0.4789	0.632	NA	NA
Deafness	Osteoporosis/BMD	0.0168	0.042	0.3986	0.6902	-0.0113117	0.000959765
Deafness	Osteoarthritis	0.1461	0.0777	1.8794	0.0602	0.0677012	2.2e-16
Deafness	Myocardial Infarction	0.2387	0.0814	2.9306	0.0034	0.0627986	2.2e-16
Deafness	LDL-C	-0.0136	0.065	-0.2095	0.8341	-0.0236656	2.2e-16
Deafness	Hypertension	0.1453	0.0457	3.1816	0.0015	0.0574576	2.2e-16
Deafness	HDL-C	-0.1442	0.0408	-3.5311	0.0004	-0.0350916	2.2e-16
Deafness	Glucose	-0.0002	0.0444	-0.0036	0.9971	0.0171007	8.23765e-14
Deafness	GERD	0.1284	0.0989	1.2984	0.1941	0.0384369	2.2e-16
Deafness	eGFR	0.0544	0.0566	0.9604	0.3368	NA	NA
Deafness	Diverticular Disease	0.1354	0.069	1.9613	0.0498	0.0458554	2.2e-16
Deafness	Diastolic BP	0.065	0.0466	1.397	0.1624	-0.000736007	0.735552
Deafness	Diaphragmatic Hernia	0.0762	0.1073	0.7106	0.4773	0.0375092	7.33318e-14
Coronary Artery Disease	Type 2 Diabetes Mellitus	0.4149	0.0356	11.6558	2.1443e-31	0.144976	2.2e-16
Coronary Artery Disease	Triglycerides	0.3123	0.0321	9.7337	2.1652e-22	0.133148	2.2e-16
Coronary Artery Disease	Systolic BP	0.338	0.0276	12.2292	2.1704e-34	0.0812905	2.2e-16
Coronary Artery Disease	Raised Total Cholesterol	0.5919	0.0352	16.8204	1.7302e-63	0.363086	2.2e-16
Coronary Artery Disease	Primary Skin Malignancy	-0.0941	0.0405	-2.326	0.02	0.052701	2.85444e-14
Coronary Artery Disease	Parkinson's Disease	-0.0397	0.0446	-0.8916	0.3726	NA	NA
Coronary Artery Disease	Osteoporosis/BMD	0.0331	0.0282	1.1715	0.2414	0.0295696	9.85212e-12
Coronary Artery Disease	Osteoarthritis	0.2825	0.05	5.6479	1.6246e-08	0.0895144	2.2e-16
Coronary Artery Disease	Myocardial Infarction	0.9809	0.0167	58.702	0	0.9999	0.5
Coronary Artery Disease	LDL-C	-0.0731	0.0993	-0.7363	0.4616	-0.257424	2.2e-16
Coronary Artery Disease	Hypertension	0.4985	0.0286	17.4039	7.7035e-68	0.319744	2.2e-16
Coronary Artery Disease	HDL-C	-0.3269	0.0301	-10.8741	1.5316e-27	-0.28095	2.2e-16
Coronary Artery Disease	Glucose	0.1453	0.0316	4.603	4.1641e-06	0.111913	2.2e-16
Coronary Artery Disease	GERD	0.3758	0.0654	5.7492	8.9645e-09	0.143711	2.2e-16
Coronary Artery Disease	eGFR	-0.055	0.0378	-1.4551	0.1456	NA	NA
Coronary Artery Disease	Diverticular Disease	0.1178	0.0427	2.7589	0.0058	0.164887	2.2e-16
Coronary Artery Disease	Diastolic BP	0.2602	0.0325	8.0001	1.243e-15	-0.0576168	2.2e-16
Coronary Artery Disease	Diaphragmatic Hernia	0.4144	0.0766	5.4097	6.3143e-08	0.141227	2.2e-16
Coronary Artery Disease	Deafness	0.2187	0.0625	3.5024	0.0005	0.0698424	2.2e-16
Cataracts	Type 2 Diabetes Mellitus	0.1338	0.055	2.4323	0.015	0.0970732	2.2e-16
Cataracts	Triglycerides	0.122	0.0339	3.5937	0.0003	0.0497843	2.2e-16
Cataracts	Systolic BP	0.0755	0.0426	1.7724	0.0763	0.0972561	2.2e-16
Cataracts	Raised Total Cholesterol	0.0867	0.0555	1.5635	0.1179	0.136308	2.2e-16
Cataracts	Primary Skin Malignancy	-0.0695	0.0724	-0.9597	0.3372	0.078562	2.2e-16
Cataracts	Parkinson's Disease	-0.0194	0.0707	-0.2741	0.784	NA	NA
Cataracts	Osteoporosis/BMD	-0.0001	0.0369	-0.0028	0.9978	-0.0563092	2.2e-16
Cataracts	Osteoarthritis	0.1097	0.0683	1.6079	0.1079	0.116351	2.2e-16
Cataracts	Myocardial Infarction	0.1097	0.0736	1.4898	0.1363	0.133627	2.2e-16
Cataracts	LDL-C	-0.0909	0.0793	-1.146	0.2518	-0.0456313	2.2e-16
Cataracts	Hypertension	0.1013	0.0425	2.3857	0.017	0.15298	2.2e-16
Cataracts	HDL-C	-0.1117	0.0419	-2.6676	0.0076	-0.0148939	0.000256565
Cataracts	Glucose	0.0602	0.0452	1.3328	0.1826	0.0746009	2.2e-16
Cataracts	GERD	0.22	0.0948	2.322	0.0202	0.0660372	5.89775e-13
Cataracts	eGFR	0.0012	0.057	0.0212	0.9831	NA	NA
Cataracts	Diverticular Disease	0.0617	0.063	0.9796	0.3273	0.114303	2.2e-16
Cataracts	Diastolic BP	0.0581	0.0413	1.4076	0.1593	-0.0294521	8.33372e-13
Cataracts	Diaphragmatic Hernia	0.2753	0.1199	2.2961	0.0217	0.0991964	2.2e-16
Cataracts	Deafness	0.014	0.0897	0.1562	0.8759	0.0703002	2.2e-16
Cataracts	Coronary Artery Disease	0.1073	0.0576	1.8638	0.0623	0.161369	2.2e-16
Atrial Fibrillation	Type 2 Diabetes Mellitus	0.012	0.0481	0.2489	0.8035	0.0689576	2.2e-16
Atrial Fibrillation	Triglycerides	-0.0026	0.0396	-0.0644	0.9486	0.0291513	4.61174e-09
Atrial Fibrillation	Systolic BP	0.1556	0.0396	3.9323	8.413e-05	0.0466126	2.2e-16
Atrial Fibrillation	Raised Total Cholesterol	0.0181	0.0478	0.379	0.7047	0.159836	2.2e-16
Atrial Fibrillation	Primary Skin Malignancy	-0.0277	0.0525	-0.5288	0.597	0.0895159	2.2e-16
Atrial Fibrillation	Parkinson's Disease	-0.0797	0.055	-1.4481	0.1476	NA	NA
Atrial Fibrillation	Osteoporosis/BMD	-0.0195	0.0356	-0.5483	0.5835	0.00615822	0.168967
Atrial Fibrillation	Osteoarthritis	0.0073	0.0601	0.121	0.9037	0.0647119	7.5545e-15
Atrial Fibrillation	Myocardial Infarction	0.1635	0.0609	2.6846	0.0073	0.277324	2.2e-16
Atrial Fibrillation	LDL-C	-0.1436	0.068	-2.11	0.0349	-0.143912	2.2e-16
Atrial Fibrillation	Hypertension	0.1747	0.0353	4.9472	7.5306e-07	0.218559	2.2e-16
Atrial Fibrillation	HDL-C	-0.0678	0.0366	-1.8551	0.0636	-0.122203	2.2e-16
Atrial Fibrillation	Glucose	0.0105	0.0372	0.2814	0.7784	0.0474162	2.2e-16
Atrial Fibrillation	GERD	-0.0028	0.0768	-0.0359	0.9713	0.0694206	2.78992e-10
Atrial Fibrillation	eGFR	-0.0483	0.0514	-0.941	0.3467	NA	NA
Atrial Fibrillation	Diverticular Disease	0.0392	0.0564	0.6949	0.4871	0.102013	2.2e-16
Atrial Fibrillation	Diastolic BP	0.153	0.0369	4.1416	3.4485e-05	0.0191659	7.09038e-05
Atrial Fibrillation	Diaphragmatic Hernia	-0.1189	0.0942	-1.2622	0.2069	0.0438037	0.000283826
Atrial Fibrillation	Deafness	0.0987	0.0765	1.2912	0.1966	0.0484555	2.2e-16
Atrial Fibrillation	Coronary Artery Disease	0.1772	0.0483	3.6651	0.0002	0.364585	2.2e-16
Atrial Fibrillation	Cataracts	0.1272	0.0731	1.7384	0.0821	0.113295	2.2e-16
Angina	Type 2 Diabetes Mellitus	0.5023	0.0426	11.7968	4.0544e-32	0.163294	2.2e-16
Angina	Triglycerides	0.3773	0.0379	9.9674	2.1166e-23	0.105218	2.2e-16
Angina	Systolic BP	0.3987	0.0322	12.3639	4.1003e-35	0.0157479	0.000104579
Angina	Raised Total Cholesterol	0.5941	0.0405	14.6872	7.7914e-49	0.449275	2.2e-16
Angina	Primary Skin Malignancy	-0.0804	0.0502	-1.6013	0.1093	0.0568995	8.74184e-12
Angina	Parkinson's Disease	-0.113	0.0481	-2.3494	0.0188	NA	NA
Angina	Osteoporosis/BMD	0.0527	0.0347	1.5187	0.1288	0.00224916	0.33819
Angina	Osteoarthritis	0.2933	0.0535	5.4807	4.2371e-08	0.152494	2.2e-16
Angina	Myocardial Infarction	0.9598	0.0443	21.6553	5.4204e-104	0.652979	2.2e-16
Angina	LDL-C	-0.035	0.0951	-0.3676	0.7132	-0.421248	2.2e-16
Angina	Hypertension	0.5455	0.0325	16.8024	2.3426e-63	0.376798	2.2e-16
Angina	HDL-C	-0.3299	0.0343	-9.6231	6.3886e-22	-0.285915	2.2e-16
Angina	Glucose	0.2135	0.038	5.6133	1.9849e-08	0.147377	2.2e-16
Angina	GERD	0.3678	0.0711	5.1734	2.2988e-07	0.151631	2.2e-16
Angina	eGFR	-0.0006	0.0467	-0.0139	0.9889	NA	NA
Angina	Diverticular Disease	0.2205	0.0474	4.6571	3.2065e-06	0.171368	2.2e-16
Angina	Diastolic BP	0.3069	0.0362	8.4893	2.0787e-17	-0.155931	2.2e-16
Angina	Diaphragmatic Hernia	0.3512	0.0854	4.1127	3.9104e-05	0.153338	2.2e-16
Angina	Deafness	0.21	0.0696	3.0186	0.0025	0.0896199	2.2e-16
Angina	Coronary Artery Disease	0.9627	0.0268	35.9001	3.044e-282	0.81533	2.2e-16
Angina	Cataracts	0.1691	0.0665	2.5438	0.011	0.1893	2.2e-16
Angina	Atrial Fibrillation	0.1003	0.0516	1.9447	0.0518	0.28666	2.2e-16
Alzheimer's Disease	Type 2 Diabetes Mellitus	0.0963	0.0905	1.0646	0.2871	NA	NA
Alzheimer's Disease	Triglycerides	0.0752	0.0576	1.3065	0.1914	NA	NA
Alzheimer's Disease	Systolic BP	-0.0429	0.0576	-0.7447	0.4564	NA	NA
Alzheimer's Disease	Raised Total Cholesterol	0.0054	0.1144	0.0468	0.9626	NA	NA
Alzheimer's Disease	Primary Skin Malignancy	-0.0748	0.0883	-0.8472	0.3969	NA	NA
Alzheimer's Disease	Parkinson's Disease	0.0306	0.0947	0.3232	0.7465	NA	NA
Alzheimer's Disease	Osteoporosis/BMD	0.0475	0.0545	0.8724	0.383	NA	NA
Alzheimer's Disease	Osteoarthritis	0.2043	0.1085	1.882	0.0598	NA	NA
Alzheimer's Disease	Myocardial Infarction	-0.2006	0.1163	-1.7251	0.0845	NA	NA
Alzheimer's Disease	LDL-C	0.012	0.1626	0.0737	0.9413	NA	NA
Alzheimer's Disease	Hypertension	-0.0778	0.0645	-1.2069	0.2275	NA	NA
Alzheimer's Disease	HDL-C	0.0245	0.0666	0.3676	0.7132	NA	NA
Alzheimer's Disease	Glucose	0.1044	0.0667	1.5653	0.1175	NA	NA
Alzheimer's Disease	GERD	0.1476	0.1376	1.0727	0.2834	NA	NA
Alzheimer's Disease	eGFR	0.1357	0.0771	1.7603	0.0784	NA	NA
Alzheimer's Disease	Diverticular Disease	0.0863	0.1006	0.8583	0.3907	NA	NA
Alzheimer's Disease	Diastolic BP	-0.04	0.0606	-0.6598	0.5094	NA	NA
Alzheimer's Disease	Diaphragmatic Hernia	-0.0557	0.1587	-0.3507	0.7258	NA	NA
Alzheimer's Disease	Deafness	0.056	0.127	0.4412	0.6591	NA	NA
Alzheimer's Disease	Coronary Artery Disease	-0.1886	0.0988	-1.9077	0.0564	NA	NA
Alzheimer's Disease	Cataracts	-0.1952	0.1299	-1.5031	0.1328	NA	NA
Alzheimer's Disease	Atrial Fibrillation	-0.0832	0.0988	-0.8428	0.3994	NA	NA
Alzheimer's Disease	Angina	-0.1171	0.094	-1.2448	0.2132	NA	NA
