# Supplementary material for: Human genetic analyses of organelles highlight the nucleus in age-related trait heritability
Source: eLife. 2021 Sep 1;10:e68610. doi: 10.7554/eLife.68610 (PMC8476128; doi:10.7554/eLife.68610)
Supplement: Source data 1. [file elife-68610-data1.xlsx]

## Sheet: Sheet1
Gupta et al. 2021 Source data 1: Coefficient point estimates and p-values for all tested gene-sets and all tested age-related traits.
geneset	n_genes	trait	p	effect	effect_se	Method
Ancient non-KRAB TFs	585	Cataracts	0.155091	1.23657e-09	1.21848e-09	S-LDSC, 100kb, UKB
Nondevelopment TFs	1180	Cataracts	0.187965	8.07156e-10	9.11606e-10	S-LDSC, 100kb, UKB
Ancient TFs	568	Cataracts	0.248319	8.43091e-10	1.24022e-09	S-LDSC, 100kb, UKB
Nondisease TFs	1225	Cataracts	0.30558	4.46699e-10	8.78605e-10	S-LDSC, 100kb, UKB
Broadly expressed TFs	858	Cataracts	0.379398	3.20486e-10	1.04372e-09	S-LDSC, 100kb, UKB
Disease TFs	298	Cataracts	0.414497	3.40766e-10	1.57767e-09	S-LDSC, 100kb, UKB
Tissue specific TFs	605	Cataracts	0.482738	4.6746e-11	1.08001e-09	S-LDSC, 100kb, UKB
Nondisease Non-ZF TFs	569	Cataracts	0.625139	-3.98402e-10	1.24889e-09	S-LDSC, 100kb, UKB
Recently-evolved TFs	496	Cataracts	0.647541	-5.2958e-10	1.39845e-09	S-LDSC, 100kb, UKB
Development TFs	343	Cataracts	0.794113	-1.35842e-09	1.65504e-09	S-LDSC, 100kb, UKB
Recent non-KRAB TFs	618	Cataracts	0.892941	-1.28304e-09	1.03277e-09	S-LDSC, 100kb, UKB
Intermediate-age TFs	461	Cataracts	0.920291	-1.6111e-09	1.14503e-09	S-LDSC, 100kb, UKB
Ancient non-KRAB TFs	585	Coronary Artery Disease	0.0394067	2.9656e-09	1.68729e-09	S-LDSC, 100kb, UKB
Ancient TFs	568	Coronary Artery Disease	0.0662046	2.60495e-09	1.73124e-09	S-LDSC, 100kb, UKB
Broadly expressed TFs	858	Coronary Artery Disease	0.168916	1.43102e-09	1.49304e-09	S-LDSC, 100kb, UKB
Development TFs	343	Coronary Artery Disease	0.181988	1.99183e-09	2.19409e-09	S-LDSC, 100kb, UKB
Disease TFs	298	Coronary Artery Disease	0.218971	1.9234e-09	2.47965e-09	S-LDSC, 100kb, UKB
Nondevelopment TFs	1180	Coronary Artery Disease	0.228402	1.00119e-09	1.34547e-09	S-LDSC, 100kb, UKB
Nondisease TFs	1225	Coronary Artery Disease	0.254253	8.93479e-10	1.35137e-09	S-LDSC, 100kb, UKB
Tissue specific TFs	605	Coronary Artery Disease	0.307172	8.69618e-10	1.72584e-09	S-LDSC, 100kb, UKB
Nondisease Non-ZF TFs	569	Coronary Artery Disease	0.430429	3.05206e-10	1.74123e-09	S-LDSC, 100kb, UKB
Recently-evolved TFs	496	Coronary Artery Disease	0.57862	-3.71216e-10	1.87137e-09	S-LDSC, 100kb, UKB
Intermediate-age TFs	461	Coronary Artery Disease	0.600756	-4.91623e-10	1.92563e-09	S-LDSC, 100kb, UKB
Recent non-KRAB TFs	618	Coronary Artery Disease	0.6728	-8.75405e-10	1.95552e-09	S-LDSC, 100kb, UKB
Disease TFs	298	Deafness	0.322742	1.03915e-09	2.25881e-09	S-LDSC, 100kb, UKB
Intermediate-age TFs	461	Deafness	0.341409	9.36286e-10	2.29134e-09	S-LDSC, 100kb, UKB
Broadly expressed TFs	858	Deafness	0.374225	5.02373e-10	1.56657e-09	S-LDSC, 100kb, UKB
Recent non-KRAB TFs	618	Deafness	0.418333	4.45168e-10	2.15933e-09	S-LDSC, 100kb, UKB
Nondisease Non-ZF TFs	569	Deafness	0.485798	7.06667e-11	1.98466e-09	S-LDSC, 100kb, UKB
Ancient TFs	568	Deafness	0.64484	-6.34862e-10	1.70925e-09	S-LDSC, 100kb, UKB
Nondevelopment TFs	1180	Deafness	0.645954	-5.02277e-10	1.34148e-09	S-LDSC, 100kb, UKB
Ancient non-KRAB TFs	585	Deafness	0.725564	-1.01898e-09	1.69986e-09	S-LDSC, 100kb, UKB
Recently-evolved TFs	496	Deafness	0.74676	-1.25788e-09	1.89347e-09	S-LDSC, 100kb, UKB
Development TFs	343	Deafness	0.77341	-1.61026e-09	2.14665e-09	S-LDSC, 100kb, UKB
Nondisease TFs	1225	Deafness	0.808592	-1.18175e-09	1.3541e-09	S-LDSC, 100kb, UKB
Tissue specific TFs	605	Deafness	0.870405	-1.74015e-09	1.54227e-09	S-LDSC, 100kb, UKB
Development TFs	343	Diaphragmatic Hernia	0.00335277	4.06895e-09	1.50083e-09	S-LDSC, 100kb, UKB
Disease TFs	298	Diaphragmatic Hernia	0.0191386	3.65322e-09	1.76324e-09	S-LDSC, 100kb, UKB
Ancient non-KRAB TFs	585	Diaphragmatic Hernia	0.0471419	1.66209e-09	9.93346e-10	S-LDSC, 100kb, UKB
Ancient TFs	568	Diaphragmatic Hernia	0.0518378	1.6254e-09	9.98837e-10	S-LDSC, 100kb, UKB
Broadly expressed TFs	858	Diaphragmatic Hernia	0.0777156	1.37237e-09	9.66047e-10	S-LDSC, 100kb, UKB
Nondisease Non-ZF TFs	569	Diaphragmatic Hernia	0.215732	7.56581e-10	9.6173e-10	S-LDSC, 100kb, UKB
Intermediate-age TFs	461	Diaphragmatic Hernia	0.300245	5.71556e-10	1.09139e-09	S-LDSC, 100kb, UKB
Tissue specific TFs	605	Diaphragmatic Hernia	0.563724	-1.49527e-10	9.32111e-10	S-LDSC, 100kb, UKB
Recent non-KRAB TFs	618	Diaphragmatic Hernia	0.601122	-2.58605e-10	1.00918e-09	S-LDSC, 100kb, UKB
Nondisease TFs	1225	Diaphragmatic Hernia	0.621814	-2.2354e-10	7.20521e-10	S-LDSC, 100kb, UKB
Nondevelopment TFs	1180	Diaphragmatic Hernia	0.700454	-3.92921e-10	7.47413e-10	S-LDSC, 100kb, UKB
Recently-evolved TFs	496	Diaphragmatic Hernia	0.798337	-1.24594e-09	1.49091e-09	S-LDSC, 100kb, UKB
Broadly expressed TFs	858	Angina	0.0755819	1.94755e-09	1.35677e-09	S-LDSC, 100kb, UKB
Ancient non-KRAB TFs	585	Angina	0.177156	1.24301e-09	1.34197e-09	S-LDSC, 100kb, UKB
Ancient TFs	568	Angina	0.233499	9.71596e-10	1.33576e-09	S-LDSC, 100kb, UKB
Nondevelopment TFs	1180	Angina	0.263166	7.29364e-10	1.15111e-09	S-LDSC, 100kb, UKB
Nondisease TFs	1225	Angina	0.390535	2.98655e-10	1.07458e-09	S-LDSC, 100kb, UKB
Disease TFs	298	Angina	0.43633	2.54393e-10	1.58717e-09	S-LDSC, 100kb, UKB
Recent non-KRAB TFs	618	Angina	0.493252	2.41582e-11	1.42813e-09	S-LDSC, 100kb, UKB
Intermediate-age TFs	461	Angina	0.57538	-3.02786e-10	1.59286e-09	S-LDSC, 100kb, UKB
Recently-evolved TFs	496	Angina	0.652804	-6.64005e-10	1.69e-09	S-LDSC, 100kb, UKB
Development TFs	343	Angina	0.714849	-7.84952e-10	1.38291e-09	S-LDSC, 100kb, UKB
Nondisease Non-ZF TFs	569	Angina	0.747982	-9.04147e-10	1.3532e-09	S-LDSC, 100kb, UKB
Tissue specific TFs	605	Angina	0.942	-1.67708e-09	1.06699e-09	S-LDSC, 100kb, UKB
Nondevelopment TFs	1180	Diastolic BP	0.00119156	1.08648e-08	3.57655e-09	S-LDSC, 100kb, UKB
Broadly expressed TFs	858	Diastolic BP	0.00145114	9.9022e-09	3.32523e-09	S-LDSC, 100kb, UKB
Intermediate-age TFs	461	Diastolic BP	0.0015432	1.18463e-08	4.00347e-09	S-LDSC, 100kb, UKB
Disease TFs	298	Diastolic BP	0.00156096	2.1698e-08	7.34163e-09	S-LDSC, 100kb, UKB
Ancient non-KRAB TFs	585	Diastolic BP	0.00283068	1.32952e-08	4.80531e-09	S-LDSC, 100kb, UKB
Recent non-KRAB TFs	618	Diastolic BP	0.00293505	1.0618e-08	3.85415e-09	S-LDSC, 100kb, UKB
Tissue specific TFs	605	Diastolic BP	0.00534919	1.13358e-08	4.44122e-09	S-LDSC, 100kb, UKB
Ancient TFs	568	Diastolic BP	0.00595481	1.2345e-08	4.90893e-09	S-LDSC, 100kb, UKB
Nondisease TFs	1225	Diastolic BP	0.00871388	6.55742e-09	2.75805e-09	S-LDSC, 100kb, UKB
Development TFs	343	Diastolic BP	0.00879092	1.1606e-08	4.88817e-09	S-LDSC, 100kb, UKB
Nondisease Non-ZF TFs	569	Diastolic BP	0.0228012	8.02576e-09	4.01477e-09	S-LDSC, 100kb, UKB
Recently-evolved TFs	496	Diastolic BP	0.374609	2.02025e-09	6.31976e-09	S-LDSC, 100kb, UKB
Recent non-KRAB TFs	618	Diverticular Disease	0.0658681	2.04411e-09	1.35615e-09	S-LDSC, 100kb, UKB
Intermediate-age TFs	461	Diverticular Disease	0.071678	2.20156e-09	1.50441e-09	S-LDSC, 100kb, UKB
Nondisease TFs	1225	Diverticular Disease	0.125227	1.10363e-09	9.60308e-10	S-LDSC, 100kb, UKB
Nondisease Non-ZF TFs	569	Diverticular Disease	0.13143	1.53882e-09	1.37437e-09	S-LDSC, 100kb, UKB
Nondevelopment TFs	1180	Diverticular Disease	0.13936	1.08736e-09	1.00384e-09	S-LDSC, 100kb, UKB
Broadly expressed TFs	858	Diverticular Disease	0.142487	1.49203e-09	1.39545e-09	S-LDSC, 100kb, UKB
Ancient non-KRAB TFs	585	Diverticular Disease	0.159003	1.43942e-09	1.44149e-09	S-LDSC, 100kb, UKB
Development TFs	343	Diverticular Disease	0.194193	1.7912e-09	2.07664e-09	S-LDSC, 100kb, UKB
Tissue specific TFs	605	Diverticular Disease	0.217102	9.084e-10	1.16161e-09	S-LDSC, 100kb, UKB
Disease TFs	298	Diverticular Disease	0.236392	1.44007e-09	2.00578e-09	S-LDSC, 100kb, UKB
Ancient TFs	568	Diverticular Disease	0.294033	7.63555e-10	1.40971e-09	S-LDSC, 100kb, UKB
Recently-evolved TFs	496	Diverticular Disease	0.565403	-2.59153e-10	1.57365e-09	S-LDSC, 100kb, UKB
Ancient non-KRAB TFs	585	Glucose	0.00474558	1.58921e-08	6.12686e-09	S-LDSC, 100kb, UKB
Ancient TFs	568	Glucose	0.00674586	1.5306e-08	6.19545e-09	S-LDSC, 100kb, UKB
Broadly expressed TFs	858	Glucose	0.00903106	1.12668e-08	4.76531e-09	S-LDSC, 100kb, UKB
Nondisease TFs	1225	Glucose	0.00903544	8.95033e-09	3.78583e-09	S-LDSC, 100kb, UKB
Disease TFs	298	Glucose	0.0126479	1.68378e-08	7.52744e-09	S-LDSC, 100kb, UKB
Development TFs	343	Glucose	0.0134111	1.51577e-08	6.84598e-09	S-LDSC, 100kb, UKB
Nondisease Non-ZF TFs	569	Glucose	0.0149616	1.32425e-08	6.09941e-09	S-LDSC, 100kb, UKB
Tissue specific TFs	605	Glucose	0.0172135	1.0348e-08	4.89261e-09	S-LDSC, 100kb, UKB
Nondevelopment TFs	1180	Glucose	0.0188912	8.27593e-09	3.98416e-09	S-LDSC, 100kb, UKB
Intermediate-age TFs	461	Glucose	0.0228438	1.16265e-08	5.81828e-09	S-LDSC, 100kb, UKB
Recent non-KRAB TFs	618	Glucose	0.0270907	8.06682e-09	4.18972e-09	S-LDSC, 100kb, UKB
Recently-evolved TFs	496	Glucose	0.8213	-3.22363e-09	3.50269e-09	S-LDSC, 100kb, UKB
Nondisease Non-ZF TFs	569	GERD	0.0941989	1.33682e-09	1.01634e-09	S-LDSC, 100kb, UKB
Tissue specific TFs	605	GERD	0.152803	1.01576e-09	9.91479e-10	S-LDSC, 100kb, UKB
Recently-evolved TFs	496	GERD	0.196779	1.3067e-09	1.53156e-09	S-LDSC, 100kb, UKB
Nondisease TFs	1225	GERD	0.26118	4.79197e-10	7.49083e-10	S-LDSC, 100kb, UKB
Development TFs	343	GERD	0.277512	7.31037e-10	1.23853e-09	S-LDSC, 100kb, UKB
Ancient non-KRAB TFs	585	GERD	0.398177	2.37432e-10	9.20034e-10	S-LDSC, 100kb, UKB
Ancient TFs	568	GERD	0.407759	2.16268e-10	9.26939e-10	S-LDSC, 100kb, UKB
Recent non-KRAB TFs	618	GERD	0.436407	1.75001e-10	1.09317e-09	S-LDSC, 100kb, UKB
Nondevelopment TFs	1180	GERD	0.536506	-7.2876e-11	7.95289e-10	S-LDSC, 100kb, UKB
Disease TFs	298	GERD	0.677349	-6.75486e-10	1.4675e-09	S-LDSC, 100kb, UKB
Broadly expressed TFs	858	GERD	0.687767	-4.77867e-10	9.76171e-10	S-LDSC, 100kb, UKB
Intermediate-age TFs	461	GERD	0.772852	-8.39382e-10	1.12176e-09	S-LDSC, 100kb, UKB
Intermediate-age TFs	461	HDL-C	0.01037	2.04097e-08	8.8251e-09	S-LDSC, 100kb, UKB
Recent non-KRAB TFs	618	HDL-C	0.0115429	2.38719e-08	1.05069e-08	S-LDSC, 100kb, UKB
Broadly expressed TFs	858	HDL-C	0.0320527	1.76182e-08	9.51593e-09	S-LDSC, 100kb, UKB
Disease TFs	298	HDL-C	0.0532858	2.13884e-08	1.32534e-08	S-LDSC, 100kb, UKB
Development TFs	343	HDL-C	0.10663	1.2011e-08	9.6501e-09	S-LDSC, 100kb, UKB
Nondevelopment TFs	1180	HDL-C	0.116019	9.16076e-09	7.66511e-09	S-LDSC, 100kb, UKB
Nondisease Non-ZF TFs	569	HDL-C	0.124764	9.92962e-09	8.62322e-09	S-LDSC, 100kb, UKB
Nondisease TFs	1225	HDL-C	0.154321	7.24957e-09	7.12086e-09	S-LDSC, 100kb, UKB
Tissue specific TFs	605	HDL-C	0.180992	7.52641e-09	8.25635e-09	S-LDSC, 100kb, UKB
Ancient non-KRAB TFs	585	HDL-C	0.27315	5.36516e-09	8.89281e-09	S-LDSC, 100kb, UKB
Ancient TFs	568	HDL-C	0.284282	5.14515e-09	9.02395e-09	S-LDSC, 100kb, UKB
Recently-evolved TFs	496	HDL-C	0.323704	8.87268e-09	1.93995e-08	S-LDSC, 100kb, UKB
Intermediate-age TFs	461	Hypertension	3.3293e-06	2.03049e-08	4.50788e-09	S-LDSC, 100kb, UKB
Recent non-KRAB TFs	618	Hypertension	3.90352e-06	2.03435e-08	4.5507e-09	S-LDSC, 100kb, UKB
Tissue specific TFs	605	Hypertension	8.31577e-06	1.85513e-08	4.30836e-09	S-LDSC, 100kb, UKB
Disease TFs	298	Hypertension	3.20517e-05	2.38277e-08	5.96114e-09	S-LDSC, 100kb, UKB
Development TFs	343	Hypertension	4.15803e-05	2.27128e-08	5.77185e-09	S-LDSC, 100kb, UKB
Nondevelopment TFs	1180	Hypertension	0.000113271	1.22448e-08	3.3207e-09	S-LDSC, 100kb, UKB
Ancient non-KRAB TFs	585	Hypertension	0.000213113	1.50219e-08	4.26362e-09	S-LDSC, 100kb, UKB
Nondisease TFs	1225	Hypertension	0.000225517	1.19065e-08	3.39385e-09	S-LDSC, 100kb, UKB
Ancient TFs	568	Hypertension	0.000337018	1.4953e-08	4.39804e-09	S-LDSC, 100kb, UKB
Broadly expressed TFs	858	Hypertension	0.000680008	1.1811e-08	3.68749e-09	S-LDSC, 100kb, UKB
Nondisease Non-ZF TFs	569	Hypertension	0.00169366	1.48476e-08	5.06709e-09	S-LDSC, 100kb, UKB
Recently-evolved TFs	496	Hypertension	0.268841	4.61859e-09	7.4938e-09	S-LDSC, 100kb, UKB
Disease TFs	298	LDL-C	0.01332	2.08564e-08	9.40856e-09	S-LDSC, 100kb, UKB
Intermediate-age TFs	461	LDL-C	0.0362415	1.33112e-08	7.41128e-09	S-LDSC, 100kb, UKB
Tissue specific TFs	605	LDL-C	0.0530332	9.79664e-09	6.06179e-09	S-LDSC, 100kb, UKB
Recent non-KRAB TFs	618	LDL-C	0.0534452	1.74503e-08	1.0823e-08	S-LDSC, 100kb, UKB
Nondevelopment TFs	1180	LDL-C	0.120025	8.84048e-09	7.52472e-09	S-LDSC, 100kb, UKB
Broadly expressed TFs	858	LDL-C	0.122368	1.14811e-08	9.87003e-09	S-LDSC, 100kb, UKB
Ancient non-KRAB TFs	585	LDL-C	0.169981	5.19654e-09	5.44574e-09	S-LDSC, 100kb, UKB
Recently-evolved TFs	496	LDL-C	0.284665	1.29947e-08	2.28362e-08	S-LDSC, 100kb, UKB
Nondisease TFs	1225	LDL-C	0.305649	3.1466e-09	6.19141e-09	S-LDSC, 100kb, UKB
Ancient TFs	568	LDL-C	0.363754	1.9134e-09	5.49128e-09	S-LDSC, 100kb, UKB
Development TFs	343	LDL-C	0.389868	1.7882e-09	6.39413e-09	S-LDSC, 100kb, UKB
Nondisease Non-ZF TFs	569	LDL-C	0.678504	-3.21164e-09	6.9288e-09	S-LDSC, 100kb, UKB
Tissue specific TFs	605	Myocardial Infarction	0.00643793	3.09894e-09	1.24596e-09	S-LDSC, 100kb, UKB
Nondisease TFs	1225	Myocardial Infarction	0.0138092	2.25841e-09	1.02531e-09	S-LDSC, 100kb, UKB
Intermediate-age TFs	461	Myocardial Infarction	0.0142724	3.45925e-09	1.57977e-09	S-LDSC, 100kb, UKB
Nondisease Non-ZF TFs	569	Myocardial Infarction	0.0155904	2.82699e-09	1.31198e-09	S-LDSC, 100kb, UKB
Ancient non-KRAB TFs	585	Myocardial Infarction	0.0232893	2.3992e-09	1.20556e-09	S-LDSC, 100kb, UKB
Nondevelopment TFs	1180	Myocardial Infarction	0.0233626	1.97789e-09	9.94521e-10	S-LDSC, 100kb, UKB
Recent non-KRAB TFs	618	Myocardial Infarction	0.0278608	2.76786e-09	1.44671e-09	S-LDSC, 100kb, UKB
Broadly expressed TFs	858	Myocardial Infarction	0.0420788	1.89093e-09	1.09489e-09	S-LDSC, 100kb, UKB
Development TFs	343	Myocardial Infarction	0.043617	3.18392e-09	1.86175e-09	S-LDSC, 100kb, UKB
Ancient TFs	568	Myocardial Infarction	0.0448491	1.98167e-09	1.16776e-09	S-LDSC, 100kb, UKB
Disease TFs	298	Myocardial Infarction	0.05459	2.79986e-09	1.74785e-09	S-LDSC, 100kb, UKB
Recently-evolved TFs	496	Myocardial Infarction	0.188688	1.27247e-09	1.4415e-09	S-LDSC, 100kb, UKB
Broadly expressed TFs	858	Osteoarthritis	0.00828637	2.57064e-09	1.07287e-09	S-LDSC, 100kb, UKB
Nondevelopment TFs	1180	Osteoarthritis	0.0246229	2.08518e-09	1.06037e-09	S-LDSC, 100kb, UKB
Recently-evolved TFs	496	Osteoarthritis	0.0334691	3.89407e-09	2.12548e-09	S-LDSC, 100kb, UKB
Recent non-KRAB TFs	618	Osteoarthritis	0.0449664	2.30338e-09	1.35832e-09	S-LDSC, 100kb, UKB
Disease TFs	298	Osteoarthritis	0.045374	2.50866e-09	1.48313e-09	S-LDSC, 100kb, UKB
Nondisease Non-ZF TFs	569	Osteoarthritis	0.0554606	2.05858e-09	1.2914e-09	S-LDSC, 100kb, UKB
Nondisease TFs	1225	Osteoarthritis	0.0585466	1.59946e-09	1.02066e-09	S-LDSC, 100kb, UKB
Tissue specific TFs	605	Osteoarthritis	0.0793569	1.60576e-09	1.13931e-09	S-LDSC, 100kb, UKB
Intermediate-age TFs	461	Osteoarthritis	0.0958887	1.87985e-09	1.44012e-09	S-LDSC, 100kb, UKB
Ancient non-KRAB TFs	585	Osteoarthritis	0.115829	1.33945e-09	1.11984e-09	S-LDSC, 100kb, UKB
Ancient TFs	568	Osteoarthritis	0.157528	1.13669e-09	1.13141e-09	S-LDSC, 100kb, UKB
Development TFs	343	Osteoarthritis	0.174982	1.45242e-09	1.55396e-09	S-LDSC, 100kb, UKB
Tissue specific TFs	605	Atrial Fibrillation	0.0183914	7.81887e-09	3.74437e-09	S-LDSC, 100kb, UKB
Development TFs	343	Atrial Fibrillation	0.0337949	1.24965e-08	6.83719e-09	S-LDSC, 100kb, UKB
Ancient non-KRAB TFs	585	Atrial Fibrillation	0.0430066	6.60492e-09	3.8472e-09	S-LDSC, 100kb, UKB
Disease TFs	298	Atrial Fibrillation	0.0489516	1.21842e-08	7.36161e-09	S-LDSC, 100kb, UKB
Intermediate-age TFs	461	Atrial Fibrillation	0.0498796	3.59827e-09	2.18604e-09	S-LDSC, 100kb, UKB
Ancient TFs	568	Atrial Fibrillation	0.0679596	5.78956e-09	3.88259e-09	S-LDSC, 100kb, UKB
Nondisease TFs	1225	Atrial Fibrillation	0.16772	1.2124e-09	1.2587e-09	S-LDSC, 100kb, UKB
Nondevelopment TFs	1180	Atrial Fibrillation	0.182659	1.08443e-09	1.19789e-09	S-LDSC, 100kb, UKB
Broadly expressed TFs	858	Atrial Fibrillation	0.199105	1.17754e-09	1.39383e-09	S-LDSC, 100kb, UKB
Recent non-KRAB TFs	618	Atrial Fibrillation	0.206692	1.55331e-09	1.89902e-09	S-LDSC, 100kb, UKB
Nondisease Non-ZF TFs	569	Atrial Fibrillation	0.625279	-4.90897e-10	1.53706e-09	S-LDSC, 100kb, UKB
Recently-evolved TFs	496	Atrial Fibrillation	0.794654	-1.3289e-09	1.61534e-09	S-LDSC, 100kb, UKB
Development TFs	343	Osteoporosis/BMD	0.00241755	9.03886e-08	3.20775e-08	S-LDSC, 100kb, UKB
Tissue specific TFs	605	Osteoporosis/BMD	0.0216212	3.78595e-08	1.87297e-08	S-LDSC, 100kb, UKB
Intermediate-age TFs	461	Osteoporosis/BMD	0.0218727	5.51074e-08	2.73279e-08	S-LDSC, 100kb, UKB
Disease TFs	298	Osteoporosis/BMD	0.0265607	5.97437e-08	3.08923e-08	S-LDSC, 100kb, UKB
Recent non-KRAB TFs	618	Osteoporosis/BMD	0.0396606	4.22633e-08	2.40866e-08	S-LDSC, 100kb, UKB
Ancient TFs	568	Osteoporosis/BMD	0.041776	2.13754e-08	1.23526e-08	S-LDSC, 100kb, UKB
Ancient non-KRAB TFs	585	Osteoporosis/BMD	0.0418575	2.05825e-08	1.19006e-08	S-LDSC, 100kb, UKB
Nondisease Non-ZF TFs	569	Osteoporosis/BMD	0.0601555	1.94462e-08	1.25179e-08	S-LDSC, 100kb, UKB
Nondisease TFs	1225	Osteoporosis/BMD	0.0636414	1.56068e-08	1.02346e-08	S-LDSC, 100kb, UKB
Broadly expressed TFs	858	Osteoporosis/BMD	0.114153	1.37664e-08	1.14269e-08	S-LDSC, 100kb, UKB
Nondevelopment TFs	1180	Osteoporosis/BMD	0.519203	-3.89723e-10	8.09337e-09	S-LDSC, 100kb, UKB
Recently-evolved TFs	496	Osteoporosis/BMD	0.995017	-2.62337e-08	1.018e-08	S-LDSC, 100kb, UKB
Intermediate-age TFs	461	Primary Skin Malignancy	0.0220977	9.01449e-09	4.47985e-09	S-LDSC, 100kb, UKB
Nondevelopment TFs	1180	Primary Skin Malignancy	0.0288304	5.50268e-09	2.89879e-09	S-LDSC, 100kb, UKB
Broadly expressed TFs	858	Primary Skin Malignancy	0.0318492	7.58759e-09	4.09192e-09	S-LDSC, 100kb, UKB
Recent non-KRAB TFs	618	Primary Skin Malignancy	0.04047	9.27078e-09	5.31198e-09	S-LDSC, 100kb, UKB
Nondisease TFs	1225	Primary Skin Malignancy	0.0436159	4.78021e-09	2.79514e-09	S-LDSC, 100kb, UKB
Disease TFs	298	Primary Skin Malignancy	0.0494818	8.57063e-09	5.19464e-09	S-LDSC, 100kb, UKB
Nondisease Non-ZF TFs	569	Primary Skin Malignancy	0.0658163	4.02137e-09	2.66723e-09	S-LDSC, 100kb, UKB
Ancient non-KRAB TFs	585	Primary Skin Malignancy	0.110673	3.90013e-09	3.1891e-09	S-LDSC, 100kb, UKB
Ancient TFs	568	Primary Skin Malignancy	0.110891	3.97271e-09	3.25152e-09	S-LDSC, 100kb, UKB
Development TFs	343	Primary Skin Malignancy	0.150849	5.29763e-09	5.12939e-09	S-LDSC, 100kb, UKB
Tissue specific TFs	605	Primary Skin Malignancy	0.16757	2.61096e-09	2.709e-09	S-LDSC, 100kb, UKB
Recently-evolved TFs	496	Primary Skin Malignancy	0.359435	1.36727e-09	3.79832e-09	S-LDSC, 100kb, UKB
Disease TFs	298	Raised Total Cholesterol	0.0109865	7.36529e-09	3.21511e-09	S-LDSC, 100kb, UKB
Development TFs	343	Raised Total Cholesterol	0.0254696	6.48113e-09	3.32027e-09	S-LDSC, 100kb, UKB
Intermediate-age TFs	461	Raised Total Cholesterol	0.0564309	5.01828e-09	3.16519e-09	S-LDSC, 100kb, UKB
Ancient non-KRAB TFs	585	Raised Total Cholesterol	0.0843914	3.64703e-09	2.65022e-09	S-LDSC, 100kb, UKB
Tissue specific TFs	605	Raised Total Cholesterol	0.0918667	3.31507e-09	2.49376e-09	S-LDSC, 100kb, UKB
Ancient TFs	568	Raised Total Cholesterol	0.191439	2.31214e-09	2.6497e-09	S-LDSC, 100kb, UKB
Recent non-KRAB TFs	618	Raised Total Cholesterol	0.240308	1.78682e-09	2.53337e-09	S-LDSC, 100kb, UKB
Broadly expressed TFs	858	Raised Total Cholesterol	0.345185	1.06574e-09	2.67537e-09	S-LDSC, 100kb, UKB
Nondisease Non-ZF TFs	569	Raised Total Cholesterol	0.504761	-3.8778e-11	3.2496e-09	S-LDSC, 100kb, UKB
Nondevelopment TFs	1180	Raised Total Cholesterol	0.534829	-1.93504e-10	2.21366e-09	S-LDSC, 100kb, UKB
Nondisease TFs	1225	Raised Total Cholesterol	0.552068	-3.20694e-10	2.45014e-09	S-LDSC, 100kb, UKB
Recently-evolved TFs	496	Raised Total Cholesterol	0.893489	-4.7544e-09	3.81788e-09	S-LDSC, 100kb, UKB
Nondevelopment TFs	1180	Systolic BP	2.23262e-05	1.42909e-08	3.50098e-09	S-LDSC, 100kb, UKB
Tissue specific TFs	605	Systolic BP	4.1095e-05	1.63924e-08	4.1627e-09	S-LDSC, 100kb, UKB
Ancient non-KRAB TFs	585	Systolic BP	5.02878e-05	1.70815e-08	4.39204e-09	S-LDSC, 100kb, UKB
Recent non-KRAB TFs	618	Systolic BP	0.000192199	1.51172e-08	4.25768e-09	S-LDSC, 100kb, UKB
Ancient TFs	568	Systolic BP	0.000193033	1.62646e-08	4.58232e-09	S-LDSC, 100kb, UKB
Intermediate-age TFs	461	Systolic BP	0.000243025	1.64995e-08	4.72992e-09	S-LDSC, 100kb, UKB
Nondisease TFs	1225	Systolic BP	0.000379434	1.05377e-08	3.12935e-09	S-LDSC, 100kb, UKB
Disease TFs	298	Systolic BP	0.000909031	2.07933e-08	6.66784e-09	S-LDSC, 100kb, UKB
Broadly expressed TFs	858	Systolic BP	0.00113923	1.15603e-08	3.78863e-09	S-LDSC, 100kb, UKB
Nondisease Non-ZF TFs	569	Systolic BP	0.00517424	1.12447e-08	4.38567e-09	S-LDSC, 100kb, UKB
Development TFs	343	Systolic BP	0.020334	1.2104e-08	5.91336e-09	S-LDSC, 100kb, UKB
Recently-evolved TFs	496	Systolic BP	0.599284	-1.38356e-09	5.50134e-09	S-LDSC, 100kb, UKB
Broadly expressed TFs	858	Triglycerides	0.00454383	1.93822e-08	7.4297e-09	S-LDSC, 100kb, UKB
Nondevelopment TFs	1180	Triglycerides	0.0102442	1.35531e-08	5.84871e-09	S-LDSC, 100kb, UKB
Recent non-KRAB TFs	618	Triglycerides	0.013627	1.69947e-08	7.69735e-09	S-LDSC, 100kb, UKB
Nondisease TFs	1225	Triglycerides	0.0226615	1.11805e-08	5.58565e-09	S-LDSC, 100kb, UKB
Ancient non-KRAB TFs	585	Triglycerides	0.0245658	1.41739e-08	7.2042e-09	S-LDSC, 100kb, UKB
Disease TFs	298	Triglycerides	0.031216	1.51058e-08	8.10738e-09	S-LDSC, 100kb, UKB
Ancient TFs	568	Triglycerides	0.0436385	1.17959e-08	6.89844e-09	S-LDSC, 100kb, UKB
Nondisease Non-ZF TFs	569	Triglycerides	0.0758771	1.01692e-08	7.09468e-09	S-LDSC, 100kb, UKB
Tissue specific TFs	605	Triglycerides	0.0793943	9.13416e-09	6.482e-09	S-LDSC, 100kb, UKB
Intermediate-age TFs	461	Triglycerides	0.0932022	1.15517e-08	8.74277e-09	S-LDSC, 100kb, UKB
Recently-evolved TFs	496	Triglycerides	0.116985	1.76868e-08	1.48604e-08	S-LDSC, 100kb, UKB
Development TFs	343	Triglycerides	0.162456	7.88239e-09	8.00719e-09	S-LDSC, 100kb, UKB
Development TFs	343	Type 2 Diabetes Mellitus	0.00267958	8.36322e-09	3.00337e-09	S-LDSC, 100kb, UKB
Tissue specific TFs	605	Type 2 Diabetes Mellitus	0.0037201	5.21404e-09	1.9481e-09	S-LDSC, 100kb, UKB
Intermediate-age TFs	461	Type 2 Diabetes Mellitus	0.00910945	5.61238e-09	2.37698e-09	S-LDSC, 100kb, UKB
Nondisease TFs	1225	Type 2 Diabetes Mellitus	0.0130077	6.04176e-09	2.7142e-09	S-LDSC, 100kb, UKB
Recent non-KRAB TFs	618	Type 2 Diabetes Mellitus	0.0130307	4.73534e-09	2.12796e-09	S-LDSC, 100kb, UKB
Nondisease Non-ZF TFs	569	Type 2 Diabetes Mellitus	0.0243086	8.86688e-09	4.49654e-09	S-LDSC, 100kb, UKB
Ancient non-KRAB TFs	585	Type 2 Diabetes Mellitus	0.0326372	7.18838e-09	3.89958e-09	S-LDSC, 100kb, UKB
Broadly expressed TFs	858	Type 2 Diabetes Mellitus	0.041099	6.38311e-09	3.67252e-09	S-LDSC, 100kb, UKB
Ancient TFs	568	Type 2 Diabetes Mellitus	0.0411708	6.87528e-09	3.95755e-09	S-LDSC, 100kb, UKB
Disease TFs	298	Type 2 Diabetes Mellitus	0.04644	4.58051e-09	2.72585e-09	S-LDSC, 100kb, UKB
Nondevelopment TFs	1180	Type 2 Diabetes Mellitus	0.062851	4.2339e-09	2.76495e-09	S-LDSC, 100kb, UKB
Recently-evolved TFs	496	Type 2 Diabetes Mellitus	0.319731	1.04995e-09	2.24132e-09	S-LDSC, 100kb, UKB
All Nucleus	6263	Cataracts	0.014163	1.23512e-09	5.63278e-10	S-LDSC, 100kb, UKB
Nucleoplasm	1702	Cataracts	0.0455684	1.31167e-09	7.76397e-10	S-LDSC, 100kb, UKB
Lowest LOEUF Quantile	1029	Cataracts	0.0705911	1.20763e-09	8.20737e-10	S-LDSC, 100kb, UKB
MitoCarta Genes	1105	Cataracts	0.0733133	1.32805e-09	9.14919e-10	S-LDSC, 100kb, UKB
OXPHOS Genes	129	Cataracts	0.0756344	4.03414e-09	2.81112e-09	S-LDSC, 100kb, UKB
Mendelian Mito Disease Genes	242	Cataracts	0.0879927	2.71026e-09	2.00283e-09	S-LDSC, 100kb, UKB
Golgi apparatus	762	Cataracts	0.12558	9.36164e-10	8.15802e-10	S-LDSC, 100kb, UKB
Lysosome	274	Cataracts	0.141678	1.89854e-09	1.76969e-09	S-LDSC, 100kb, UKB
Other Nuclear Proteins	2034	Cataracts	0.142722	7.8478e-10	7.34697e-10	S-LDSC, 100kb, UKB
Non-KRAB zinc finger TFs	398	Cataracts	0.180381	1.27639e-09	1.39662e-09	S-LDSC, 100kb, UKB
Zinc finger TFs	721	Cataracts	0.210769	8.22466e-10	1.02328e-09	S-LDSC, 100kb, UKB
Other Chromosomal Proteins	281	Cataracts	0.264512	9.57041e-10	1.52033e-09	S-LDSC, 100kb, UKB
Endosome	464	Cataracts	0.267855	8.83888e-10	1.4272e-09	S-LDSC, 100kb, UKB
Chromosome and TF	1804	Cataracts	0.277799	4.19136e-10	7.11133e-10	S-LDSC, 100kb, UKB
Nuclear Envelope	246	Cataracts	0.305482	7.77154e-10	1.52773e-09	S-LDSC, 100kb, UKB
Transcription Factors	1523	Cataracts	0.337567	3.20376e-10	7.64417e-10	S-LDSC, 100kb, UKB
Cytoskeleton	1162	Cataracts	0.343379	3.58862e-10	8.89906e-10	S-LDSC, 100kb, UKB
Extracellular space	864	Cataracts	0.408881	2.4363e-10	1.05731e-09	S-LDSC, 100kb, UKB
Nucleolus	580	Cataracts	0.468815	8.67794e-11	1.10902e-09	S-LDSC, 100kb, UKB
Highest LOEUF Quantile	1058	Cataracts	0.509757	-2.28878e-11	9.35757e-10	S-LDSC, 100kb, UKB
KRAB zinc finger TFs	323	Cataracts	0.54989	-1.88625e-10	1.50437e-09	S-LDSC, 100kb, UKB
Non-zinc finger TFs	802	Cataracts	0.597608	-2.66484e-10	1.07818e-09	S-LDSC, 100kb, UKB
Endoplasmic reticulum	1108	Cataracts	0.763683	-5.61054e-10	7.81193e-10	S-LDSC, 100kb, UKB
Plasma membrane	4191	Cataracts	0.910953	-7.12276e-10	5.28926e-10	S-LDSC, 100kb, UKB
Cytosol	2855	Cataracts	0.973562	-1.18726e-09	6.13272e-10	S-LDSC, 100kb, UKB
Lowest LOEUF Quantile	1029	Coronary Artery Disease	0.0400046	1.81339e-09	1.03585e-09	S-LDSC, 100kb, UKB
Chromosome and TF	1804	Coronary Artery Disease	0.0556051	1.80724e-09	1.13465e-09	S-LDSC, 100kb, UKB
Zinc finger TFs	721	Coronary Artery Disease	0.0875475	2.23028e-09	1.64473e-09	S-LDSC, 100kb, UKB
Non-KRAB zinc finger TFs	398	Coronary Artery Disease	0.0970764	2.82042e-09	2.17224e-09	S-LDSC, 100kb, UKB
Transcription Factors	1523	Coronary Artery Disease	0.131811	1.39165e-09	1.24491e-09	S-LDSC, 100kb, UKB
Extracellular space	864	Coronary Artery Disease	0.143522	1.73699e-09	1.63154e-09	S-LDSC, 100kb, UKB
Endoplasmic reticulum	1108	Coronary Artery Disease	0.147342	1.33125e-09	1.2704e-09	S-LDSC, 100kb, UKB
Nucleolus	580	Coronary Artery Disease	0.163491	4.57098e-09	4.66326e-09	S-LDSC, 100kb, UKB
All Nucleus	6263	Coronary Artery Disease	0.165325	1.2121e-09	1.24599e-09	S-LDSC, 100kb, UKB
KRAB zinc finger TFs	323	Coronary Artery Disease	0.201609	1.57134e-09	1.87984e-09	S-LDSC, 100kb, UKB
Nucleoplasm	1702	Coronary Artery Disease	0.239828	1.83228e-09	2.59216e-09	S-LDSC, 100kb, UKB
Lysosome	274	Coronary Artery Disease	0.321044	1.38102e-09	2.97133e-09	S-LDSC, 100kb, UKB
Non-zinc finger TFs	802	Coronary Artery Disease	0.347941	5.56665e-10	1.42411e-09	S-LDSC, 100kb, UKB
Other Chromosomal Proteins	281	Coronary Artery Disease	0.351463	1.41483e-09	3.70983e-09	S-LDSC, 100kb, UKB
OXPHOS Genes	129	Coronary Artery Disease	0.357092	1.19402e-09	3.26018e-09	S-LDSC, 100kb, UKB
Nuclear Envelope	246	Coronary Artery Disease	0.3805	6.78447e-10	2.2305e-09	S-LDSC, 100kb, UKB
Cytosol	2855	Coronary Artery Disease	0.421455	1.63133e-10	8.23193e-10	S-LDSC, 100kb, UKB
Cytoskeleton	1162	Coronary Artery Disease	0.576753	-1.82615e-10	9.43293e-10	S-LDSC, 100kb, UKB
Plasma membrane	4191	Coronary Artery Disease	0.719202	-6.07882e-10	1.04722e-09	S-LDSC, 100kb, UKB
Golgi apparatus	762	Coronary Artery Disease	0.798422	-1.11253e-09	1.33079e-09	S-LDSC, 100kb, UKB
Highest LOEUF Quantile	1058	Coronary Artery Disease	0.818431	-1.35917e-09	1.49457e-09	S-LDSC, 100kb, UKB
Other Nuclear Proteins	2034	Coronary Artery Disease	0.887111	-1.4483e-09	1.19566e-09	S-LDSC, 100kb, UKB
Endosome	464	Coronary Artery Disease	0.910867	-2.17968e-09	1.61924e-09	S-LDSC, 100kb, UKB
Mendelian Mito Disease Genes	242	Coronary Artery Disease	0.955604	-3.36351e-09	1.97644e-09	S-LDSC, 100kb, UKB
MitoCarta Genes	1105	Coronary Artery Disease	0.993117	-2.9544e-09	1.19937e-09	S-LDSC, 100kb, UKB
Nucleolus	580	Deafness	0.0209635	3.99472e-09	1.96374e-09	S-LDSC, 100kb, UKB
Highest LOEUF Quantile	1058	Deafness	0.0825585	1.97905e-09	1.42576e-09	S-LDSC, 100kb, UKB
Cytosol	2855	Deafness	0.257681	6.42099e-10	9.8707e-10	S-LDSC, 100kb, UKB
Lowest LOEUF Quantile	1029	Deafness	0.292577	6.98652e-10	1.27988e-09	S-LDSC, 100kb, UKB
Non-zinc finger TFs	802	Deafness	0.324329	7.49156e-10	1.64423e-09	S-LDSC, 100kb, UKB
Cytoskeleton	1162	Deafness	0.32989	5.03571e-10	1.14392e-09	S-LDSC, 100kb, UKB
Nuclear Envelope	246	Deafness	0.413715	8.11922e-10	3.72445e-09	S-LDSC, 100kb, UKB
All Nucleus	6263	Deafness	0.485521	3.42849e-11	9.44455e-10	S-LDSC, 100kb, UKB
Golgi apparatus	762	Deafness	0.522047	-7.97959e-11	1.44315e-09	S-LDSC, 100kb, UKB
Nucleoplasm	1702	Deafness	0.55934	-1.84875e-10	1.23832e-09	S-LDSC, 100kb, UKB
Endoplasmic reticulum	1108	Deafness	0.575325	-2.3357e-10	1.22965e-09	S-LDSC, 100kb, UKB
OXPHOS Genes	129	Deafness	0.600385	-9.00364e-10	3.53995e-09	S-LDSC, 100kb, UKB
Extracellular space	864	Deafness	0.624482	-4.51954e-10	1.4245e-09	S-LDSC, 100kb, UKB
Lysosome	274	Deafness	0.721593	-1.28944e-09	2.19448e-09	S-LDSC, 100kb, UKB
Other Nuclear Proteins	2034	Deafness	0.72393	-6.27e-10	1.05457e-09	S-LDSC, 100kb, UKB
Transcription Factors	1523	Deafness	0.734661	-7.58632e-10	1.20999e-09	S-LDSC, 100kb, UKB
KRAB zinc finger TFs	323	Deafness	0.74185	-1.42797e-09	2.20006e-09	S-LDSC, 100kb, UKB
Other Chromosomal Proteins	281	Deafness	0.767229	-1.66332e-09	2.27929e-09	S-LDSC, 100kb, UKB
Chromosome and TF	1804	Deafness	0.8218	-9.80904e-10	1.06361e-09	S-LDSC, 100kb, UKB
Plasma membrane	4191	Deafness	0.885575	-9.25203e-10	7.68872e-10	S-LDSC, 100kb, UKB
MitoCarta Genes	1105	Deafness	0.894972	-1.52421e-09	1.21605e-09	S-LDSC, 100kb, UKB
Zinc finger TFs	721	Deafness	0.920844	-2.14211e-09	1.5184e-09	S-LDSC, 100kb, UKB
Non-KRAB zinc finger TFs	398	Deafness	0.956689	-3.10016e-09	1.80926e-09	S-LDSC, 100kb, UKB
Mendelian Mito Disease Genes	242	Deafness	0.97003	-4.53901e-09	2.41278e-09	S-LDSC, 100kb, UKB
Endosome	464	Deafness	0.986758	-3.36427e-09	1.51609e-09	S-LDSC, 100kb, UKB
Non-zinc finger TFs	802	Diaphragmatic Hernia	0.0307847	1.57172e-09	8.40769e-10	S-LDSC, 100kb, UKB
Transcription Factors	1523	Diaphragmatic Hernia	0.0596225	1.04726e-09	6.72204e-10	S-LDSC, 100kb, UKB
Extracellular space	864	Diaphragmatic Hernia	0.0627567	1.31893e-09	8.60897e-10	S-LDSC, 100kb, UKB
Plasma membrane	4191	Diaphragmatic Hernia	0.0818416	6.36122e-10	4.56724e-10	S-LDSC, 100kb, UKB
Chromosome and TF	1804	Diaphragmatic Hernia	0.130938	7.1452e-10	6.36846e-10	S-LDSC, 100kb, UKB
Cytosol	2855	Diaphragmatic Hernia	0.207865	4.51022e-10	5.54182e-10	S-LDSC, 100kb, UKB
Nuclear Envelope	246	Diaphragmatic Hernia	0.380532	3.26608e-10	1.07407e-09	S-LDSC, 100kb, UKB
Nucleoplasm	1702	Diaphragmatic Hernia	0.40043	1.49952e-10	5.94491e-10	S-LDSC, 100kb, UKB
Cytoskeleton	1162	Diaphragmatic Hernia	0.458389	6.55329e-11	6.27151e-10	S-LDSC, 100kb, UKB
Endosome	464	Diaphragmatic Hernia	0.470182	6.24939e-11	8.3533e-10	S-LDSC, 100kb, UKB
Highest LOEUF Quantile	1058	Diaphragmatic Hernia	0.472478	4.56655e-11	6.61425e-10	S-LDSC, 100kb, UKB
All Nucleus	6263	Diaphragmatic Hernia	0.534934	-4.27719e-11	4.87831e-10	S-LDSC, 100kb, UKB
Zinc finger TFs	721	Diaphragmatic Hernia	0.53943	-1.01668e-10	1.02698e-09	S-LDSC, 100kb, UKB
KRAB zinc finger TFs	323	Diaphragmatic Hernia	0.602606	-3.87412e-10	1.48949e-09	S-LDSC, 100kb, UKB
Non-KRAB zinc finger TFs	398	Diaphragmatic Hernia	0.617722	-4.00741e-10	1.33801e-09	S-LDSC, 100kb, UKB
Nucleolus	580	Diaphragmatic Hernia	0.624544	-3.34165e-10	1.0527e-09	S-LDSC, 100kb, UKB
MitoCarta Genes	1105	Diaphragmatic Hernia	0.629922	-2.24968e-10	6.78335e-10	S-LDSC, 100kb, UKB
Other Chromosomal Proteins	281	Diaphragmatic Hernia	0.696692	-6.46225e-10	1.25503e-09	S-LDSC, 100kb, UKB
Endoplasmic reticulum	1108	Diaphragmatic Hernia	0.750987	-4.17531e-10	6.16191e-10	S-LDSC, 100kb, UKB
Other Nuclear Proteins	2034	Diaphragmatic Hernia	0.821936	-5.38229e-10	5.83278e-10	S-LDSC, 100kb, UKB
Mendelian Mito Disease Genes	242	Diaphragmatic Hernia	0.841565	-1.08809e-09	1.0871e-09	S-LDSC, 100kb, UKB
Lowest LOEUF Quantile	1029	Diaphragmatic Hernia	0.860201	-7.10969e-10	6.57561e-10	S-LDSC, 100kb, UKB
Golgi apparatus	762	Diaphragmatic Hernia	0.902303	-9.26438e-10	7.15515e-10	S-LDSC, 100kb, UKB
Lysosome	274	Diaphragmatic Hernia	0.974796	-2.22835e-09	1.13896e-09	S-LDSC, 100kb, UKB
OXPHOS Genes	129	Diaphragmatic Hernia	0.992806	-3.54641e-09	1.44905e-09	S-LDSC, 100kb, UKB
Lowest LOEUF Quantile	1029	Angina	0.0355505	1.57441e-09	8.72333e-10	S-LDSC, 100kb, UKB
Chromosome and TF	1804	Angina	0.0606914	1.39681e-09	9.01755e-10	S-LDSC, 100kb, UKB
Other Chromosomal Proteins	281	Angina	0.0829518	4.9646e-09	3.58329e-09	S-LDSC, 100kb, UKB
Nucleoplasm	1702	Angina	0.094593	1.92411e-09	1.46544e-09	S-LDSC, 100kb, UKB
Non-KRAB zinc finger TFs	398	Angina	0.107971	2.63607e-09	2.13034e-09	S-LDSC, 100kb, UKB
Plasma membrane	4191	Angina	0.122238	8.13916e-10	6.99319e-10	S-LDSC, 100kb, UKB
Lysosome	274	Angina	0.127586	2.67083e-09	2.3472e-09	S-LDSC, 100kb, UKB
Golgi apparatus	762	Angina	0.152886	1.06339e-09	1.03833e-09	S-LDSC, 100kb, UKB
Zinc finger TFs	721	Angina	0.155757	1.62665e-09	1.60729e-09	S-LDSC, 100kb, UKB
Endoplasmic reticulum	1108	Angina	0.327666	5.25729e-10	1.17779e-09	S-LDSC, 100kb, UKB
Nucleolus	580	Angina	0.345502	9.882e-10	2.48608e-09	S-LDSC, 100kb, UKB
Transcription Factors	1523	Angina	0.386193	2.71889e-10	9.39959e-10	S-LDSC, 100kb, UKB
All Nucleus	6263	Angina	0.397248	2.02394e-10	7.77015e-10	S-LDSC, 100kb, UKB
Endosome	464	Angina	0.4241	2.58262e-10	1.34922e-09	S-LDSC, 100kb, UKB
Cytosol	2855	Angina	0.521037	-3.58056e-11	6.78691e-10	S-LDSC, 100kb, UKB
Mendelian Mito Disease Genes	242	Angina	0.538866	-1.7132e-10	1.75575e-09	S-LDSC, 100kb, UKB
Non-zinc finger TFs	802	Angina	0.694401	-5.88916e-10	1.15845e-09	S-LDSC, 100kb, UKB
Nuclear Envelope	246	Angina	0.742471	-9.6685e-10	1.48522e-09	S-LDSC, 100kb, UKB
KRAB zinc finger TFs	323	Angina	0.819984	-1.58118e-09	1.72749e-09	S-LDSC, 100kb, UKB
Extracellular space	864	Angina	0.869748	-1.32787e-09	1.18012e-09	S-LDSC, 100kb, UKB
OXPHOS Genes	129	Angina	0.892033	-3.02039e-09	2.44089e-09	S-LDSC, 100kb, UKB
Cytoskeleton	1162	Angina	0.907106	-1.13353e-09	8.56699e-10	S-LDSC, 100kb, UKB
MitoCarta Genes	1105	Angina	0.934354	-1.60984e-09	1.0668e-09	S-LDSC, 100kb, UKB
Highest LOEUF Quantile	1058	Angina	0.981721	-2.4136e-09	1.15446e-09	S-LDSC, 100kb, UKB
Other Nuclear Proteins	2034	Angina	0.987758	-1.91996e-09	8.53521e-10	S-LDSC, 100kb, UKB
Lowest LOEUF Quantile	1029	Diastolic BP	2.49272e-06	1.46248e-08	3.2034e-09	S-LDSC, 100kb, UKB
Transcription Factors	1523	Diastolic BP	2.76316e-05	1.16666e-08	2.89339e-09	S-LDSC, 100kb, UKB
Chromosome and TF	1804	Diastolic BP	4.80687e-05	1.02119e-08	2.61834e-09	S-LDSC, 100kb, UKB
Non-zinc finger TFs	802	Diastolic BP	0.0012318	1.02289e-08	3.37834e-09	S-LDSC, 100kb, UKB
All Nucleus	6263	Diastolic BP	0.00542072	4.46706e-09	1.75332e-09	S-LDSC, 100kb, UKB
Non-KRAB zinc finger TFs	398	Diastolic BP	0.00753833	1.66986e-08	6.87037e-09	S-LDSC, 100kb, UKB
Zinc finger TFs	721	Diastolic BP	0.017132	1.18641e-08	5.60431e-09	S-LDSC, 100kb, UKB
Nucleoplasm	1702	Diastolic BP	0.0592315	3.18931e-09	2.04278e-09	S-LDSC, 100kb, UKB
OXPHOS Genes	129	Diastolic BP	0.103653	1.23956e-08	9.82991e-09	S-LDSC, 100kb, UKB
Cytoskeleton	1162	Diastolic BP	0.194316	2.02642e-09	2.35057e-09	S-LDSC, 100kb, UKB
Extracellular space	864	Diastolic BP	0.207526	2.14057e-09	2.62636e-09	S-LDSC, 100kb, UKB
Cytosol	2855	Diastolic BP	0.253149	1.26625e-09	1.90524e-09	S-LDSC, 100kb, UKB
Nuclear Envelope	246	Diastolic BP	0.286622	2.20126e-09	3.90793e-09	S-LDSC, 100kb, UKB
Endosome	464	Diastolic BP	0.361679	1.62092e-09	4.57919e-09	S-LDSC, 100kb, UKB
Highest LOEUF Quantile	1058	Diastolic BP	0.501172	-9.66109e-12	3.28851e-09	S-LDSC, 100kb, UKB
Other Chromosomal Proteins	281	Diastolic BP	0.530557	-3.35682e-10	4.37829e-09	S-LDSC, 100kb, UKB
Lysosome	274	Diastolic BP	0.568968	-1.00549e-09	5.78711e-09	S-LDSC, 100kb, UKB
Nucleolus	580	Diastolic BP	0.613034	-9.10992e-10	3.17157e-09	S-LDSC, 100kb, UKB
Mendelian Mito Disease Genes	242	Diastolic BP	0.647642	-1.99878e-09	5.27435e-09	S-LDSC, 100kb, UKB
Other Nuclear Proteins	2034	Diastolic BP	0.665078	-1.00407e-09	2.35496e-09	S-LDSC, 100kb, UKB
Golgi apparatus	762	Diastolic BP	0.739667	-1.76277e-09	2.74437e-09	S-LDSC, 100kb, UKB
KRAB zinc finger TFs	323	Diastolic BP	0.828858	-4.86093e-09	5.11858e-09	S-LDSC, 100kb, UKB
Endoplasmic reticulum	1108	Diastolic BP	0.836248	-2.50878e-09	2.5622e-09	S-LDSC, 100kb, UKB
Plasma membrane	4191	Diastolic BP	0.910629	-2.06568e-09	1.53624e-09	S-LDSC, 100kb, UKB
MitoCarta Genes	1105	Diastolic BP	0.996785	-6.91704e-09	2.53832e-09	S-LDSC, 100kb, UKB
Lowest LOEUF Quantile	1029	Diverticular Disease	0.0286845	1.64984e-09	8.68111e-10	S-LDSC, 100kb, UKB
Nucleoplasm	1702	Diverticular Disease	0.0405709	1.71924e-09	9.85745e-10	S-LDSC, 100kb, UKB
Chromosome and TF	1804	Diverticular Disease	0.0502127	1.51643e-09	9.23077e-10	S-LDSC, 100kb, UKB
Non-zinc finger TFs	802	Diverticular Disease	0.0815808	1.88363e-09	1.35074e-09	S-LDSC, 100kb, UKB
Transcription Factors	1523	Diverticular Disease	0.10816	1.20305e-09	9.73049e-10	S-LDSC, 100kb, UKB
Non-KRAB zinc finger TFs	398	Diverticular Disease	0.114227	1.97555e-09	1.64035e-09	S-LDSC, 100kb, UKB
Extracellular space	864	Diverticular Disease	0.123518	1.40651e-09	1.21505e-09	S-LDSC, 100kb, UKB
Other Chromosomal Proteins	281	Diverticular Disease	0.165124	1.76282e-09	1.81059e-09	S-LDSC, 100kb, UKB
All Nucleus	6263	Diverticular Disease	0.243836	5.02677e-10	7.243e-10	S-LDSC, 100kb, UKB
Mendelian Mito Disease Genes	242	Diverticular Disease	0.272825	9.79498e-10	1.6209e-09	S-LDSC, 100kb, UKB
Cytoskeleton	1162	Diverticular Disease	0.319122	3.89578e-10	8.28613e-10	S-LDSC, 100kb, UKB
Zinc finger TFs	721	Diverticular Disease	0.334232	5.25219e-10	1.22641e-09	S-LDSC, 100kb, UKB
Endosome	464	Diverticular Disease	0.422551	2.48422e-10	1.27154e-09	S-LDSC, 100kb, UKB
Endoplasmic reticulum	1108	Diverticular Disease	0.451841	1.1967e-10	9.88924e-10	S-LDSC, 100kb, UKB
Cytosol	2855	Diverticular Disease	0.485855	3.31077e-11	9.3355e-10	S-LDSC, 100kb, UKB
Other Nuclear Proteins	2034	Diverticular Disease	0.575661	-1.48616e-10	7.78889e-10	S-LDSC, 100kb, UKB
Lysosome	274	Diverticular Disease	0.60032	-4.57071e-10	1.79825e-09	S-LDSC, 100kb, UKB
Golgi apparatus	762	Diverticular Disease	0.60318	-2.59024e-10	9.902e-10	S-LDSC, 100kb, UKB
OXPHOS Genes	129	Diverticular Disease	0.618005	-7.85558e-10	2.6164e-09	S-LDSC, 100kb, UKB
MitoCarta Genes	1105	Diverticular Disease	0.706922	-5.23857e-10	9.6224e-10	S-LDSC, 100kb, UKB
Plasma membrane	4191	Diverticular Disease	0.859446	-6.53031e-10	6.05872e-10	S-LDSC, 100kb, UKB
Nucleolus	580	Diverticular Disease	0.893453	-1.47381e-09	1.18368e-09	S-LDSC, 100kb, UKB
Nuclear Envelope	246	Diverticular Disease	0.919447	-2.07962e-09	1.484e-09	S-LDSC, 100kb, UKB
KRAB zinc finger TFs	323	Diverticular Disease	0.955609	-2.89188e-09	1.69925e-09	S-LDSC, 100kb, UKB
Highest LOEUF Quantile	1058	Diverticular Disease	0.997874	-2.79702e-09	9.78375e-10	S-LDSC, 100kb, UKB
Transcription Factors	1523	Glucose	0.000821839	1.12359e-08	3.56917e-09	S-LDSC, 100kb, UKB
Chromosome and TF	1804	Glucose	0.00282269	8.81147e-09	3.18368e-09	S-LDSC, 100kb, UKB
Non-zinc finger TFs	802	Glucose	0.00397195	1.32822e-08	5.00376e-09	S-LDSC, 100kb, UKB
Non-KRAB zinc finger TFs	398	Glucose	0.0335943	9.91443e-09	5.41651e-09	S-LDSC, 100kb, UKB
Cytosol	2855	Glucose	0.0929278	4.354e-09	3.29115e-09	S-LDSC, 100kb, UKB
Zinc finger TFs	721	Glucose	0.0976345	5.76977e-09	4.45491e-09	S-LDSC, 100kb, UKB
Endoplasmic reticulum	1108	Glucose	0.107319	7.1439e-09	5.75698e-09	S-LDSC, 100kb, UKB
All Nucleus	6263	Glucose	0.125122	2.48185e-09	2.15859e-09	S-LDSC, 100kb, UKB
Nucleoplasm	1702	Glucose	0.294501	1.3009e-09	2.40781e-09	S-LDSC, 100kb, UKB
Other Chromosomal Proteins	281	Glucose	0.516122	-3.45062e-10	8.53611e-09	S-LDSC, 100kb, UKB
Nucleolus	580	Glucose	0.52593	-2.18019e-10	3.35198e-09	S-LDSC, 100kb, UKB
Golgi apparatus	762	Glucose	0.540405	-2.65522e-10	2.61719e-09	S-LDSC, 100kb, UKB
Endosome	464	Glucose	0.601118	-1.04723e-09	4.08689e-09	S-LDSC, 100kb, UKB
OXPHOS Genes	129	Glucose	0.613241	-2.03885e-09	7.08484e-09	S-LDSC, 100kb, UKB
Lowest LOEUF Quantile	1029	Glucose	0.614977	-7.16005e-10	2.44944e-09	S-LDSC, 100kb, UKB
Plasma membrane	4191	Glucose	0.644883	-9.10111e-10	2.44955e-09	S-LDSC, 100kb, UKB
Nuclear Envelope	246	Glucose	0.757306	-2.58395e-09	3.70373e-09	S-LDSC, 100kb, UKB
Cytoskeleton	1162	Glucose	0.759837	-1.62271e-09	2.29918e-09	S-LDSC, 100kb, UKB
Other Nuclear Proteins	2034	Glucose	0.786215	-1.61415e-09	2.03459e-09	S-LDSC, 100kb, UKB
Mendelian Mito Disease Genes	242	Glucose	0.79506	-4.37226e-09	5.30547e-09	S-LDSC, 100kb, UKB
MitoCarta Genes	1105	Glucose	0.824362	-2.62505e-09	2.81622e-09	S-LDSC, 100kb, UKB
Lysosome	274	Glucose	0.830409	-3.47174e-09	3.63235e-09	S-LDSC, 100kb, UKB
KRAB zinc finger TFs	323	Glucose	0.906471	-5.41962e-09	4.10785e-09	S-LDSC, 100kb, UKB
Extracellular space	864	Glucose	0.963189	-5.4893e-09	3.06844e-09	S-LDSC, 100kb, UKB
Highest LOEUF Quantile	1058	Glucose	0.982941	-6.4249e-09	3.03251e-09	S-LDSC, 100kb, UKB
Other Chromosomal Proteins	281	GERD	0.00665735	3.64474e-09	1.47248e-09	S-LDSC, 100kb, UKB
Extracellular space	864	GERD	0.0456431	1.4943e-09	8.8491e-10	S-LDSC, 100kb, UKB
Endosome	464	GERD	0.0557232	1.62795e-09	1.02276e-09	S-LDSC, 100kb, UKB
Chromosome and TF	1804	GERD	0.14451	6.96466e-10	6.56874e-10	S-LDSC, 100kb, UKB
OXPHOS Genes	129	GERD	0.191299	1.75576e-09	2.01091e-09	S-LDSC, 100kb, UKB
Non-zinc finger TFs	802	GERD	0.195352	7.84434e-10	9.13894e-10	S-LDSC, 100kb, UKB
Nucleoplasm	1702	GERD	0.238348	4.57049e-10	6.4226e-10	S-LDSC, 100kb, UKB
Golgi apparatus	762	GERD	0.28967	4.47634e-10	8.07497e-10	S-LDSC, 100kb, UKB
Plasma membrane	4191	GERD	0.337676	1.95075e-10	4.65779e-10	S-LDSC, 100kb, UKB
Lysosome	274	GERD	0.385721	3.96118e-10	1.36362e-09	S-LDSC, 100kb, UKB
Cytoskeleton	1162	GERD	0.407169	1.43077e-10	6.0927e-10	S-LDSC, 100kb, UKB
Highest LOEUF Quantile	1058	GERD	0.423852	1.35723e-10	7.06707e-10	S-LDSC, 100kb, UKB
Transcription Factors	1523	GERD	0.465221	6.35102e-11	7.27577e-10	S-LDSC, 100kb, UKB
Mendelian Mito Disease Genes	242	GERD	0.481627	6.55463e-11	1.42272e-09	S-LDSC, 100kb, UKB
KRAB zinc finger TFs	323	GERD	0.513866	-5.15385e-11	1.48254e-09	S-LDSC, 100kb, UKB
Lowest LOEUF Quantile	1029	GERD	0.544159	-6.91741e-11	6.23655e-10	S-LDSC, 100kb, UKB
Non-KRAB zinc finger TFs	398	GERD	0.738048	-7.64764e-10	1.19993e-09	S-LDSC, 100kb, UKB
Endoplasmic reticulum	1108	GERD	0.76439	-4.91424e-10	6.82065e-10	S-LDSC, 100kb, UKB
Nuclear Envelope	246	GERD	0.79182	-1.02981e-09	1.26706e-09	S-LDSC, 100kb, UKB
MitoCarta Genes	1105	GERD	0.805335	-6.44252e-10	7.48405e-10	S-LDSC, 100kb, UKB
Zinc finger TFs	721	GERD	0.815633	-9.01962e-10	1.00347e-09	S-LDSC, 100kb, UKB
Cytosol	2855	GERD	0.831807	-5.2221e-10	5.43215e-10	S-LDSC, 100kb, UKB
All Nucleus	6263	GERD	0.889902	-5.8395e-10	4.76302e-10	S-LDSC, 100kb, UKB
Other Nuclear Proteins	2034	GERD	0.934859	-7.84823e-10	5.18723e-10	S-LDSC, 100kb, UKB
Nucleolus	580	GERD	0.94429	-1.48413e-09	9.32337e-10	S-LDSC, 100kb, UKB
Extracellular space	864	HDL-C	0.0102212	4.17207e-08	1.79976e-08	S-LDSC, 100kb, UKB
Non-zinc finger TFs	802	HDL-C	0.0457541	1.51707e-08	8.99007e-09	S-LDSC, 100kb, UKB
Transcription Factors	1523	HDL-C	0.0525222	1.10635e-08	6.8256e-09	S-LDSC, 100kb, UKB
Lowest LOEUF Quantile	1029	HDL-C	0.0526165	1.21673e-08	7.51072e-09	S-LDSC, 100kb, UKB
Non-KRAB zinc finger TFs	398	HDL-C	0.110848	1.31536e-08	1.07637e-08	S-LDSC, 100kb, UKB
Endosome	464	HDL-C	0.120647	1.95783e-08	1.67085e-08	S-LDSC, 100kb, UKB
Chromosome and TF	1804	HDL-C	0.196264	5.72017e-09	6.68993e-09	S-LDSC, 100kb, UKB
Zinc finger TFs	721	HDL-C	0.203142	7.21837e-09	8.6921e-09	S-LDSC, 100kb, UKB
Endoplasmic reticulum	1108	HDL-C	0.254192	4.84234e-09	7.32184e-09	S-LDSC, 100kb, UKB
Nuclear Envelope	246	HDL-C	0.277648	1.37923e-08	2.3383e-08	S-LDSC, 100kb, UKB
Golgi apparatus	762	HDL-C	0.286094	6.51095e-09	1.15273e-08	S-LDSC, 100kb, UKB
Cytosol	2855	HDL-C	0.33018	2.57268e-09	5.85475e-09	S-LDSC, 100kb, UKB
Other Nuclear Proteins	2034	HDL-C	0.445876	9.24774e-10	6.79542e-09	S-LDSC, 100kb, UKB
Nucleolus	580	HDL-C	0.542946	-1.20376e-09	1.11605e-08	S-LDSC, 100kb, UKB
All Nucleus	6263	HDL-C	0.560617	-7.40197e-10	4.85265e-09	S-LDSC, 100kb, UKB
Nucleoplasm	1702	HDL-C	0.670315	-3.20524e-09	7.27169e-09	S-LDSC, 100kb, UKB
MitoCarta Genes	1105	HDL-C	0.713352	-5.27823e-09	9.37178e-09	S-LDSC, 100kb, UKB
Plasma membrane	4191	HDL-C	0.733512	-2.7781e-09	4.45587e-09	S-LDSC, 100kb, UKB
Lysosome	274	HDL-C	0.763508	-1.02706e-08	1.43119e-08	S-LDSC, 100kb, UKB
Cytoskeleton	1162	HDL-C	0.816918	-6.73349e-09	7.45117e-09	S-LDSC, 100kb, UKB
OXPHOS Genes	129	HDL-C	0.851098	-1.76554e-08	1.69575e-08	S-LDSC, 100kb, UKB
Highest LOEUF Quantile	1058	HDL-C	0.962032	-1.13883e-08	6.41675e-09	S-LDSC, 100kb, UKB
KRAB zinc finger TFs	323	HDL-C	0.980056	-1.73288e-08	8.43288e-09	S-LDSC, 100kb, UKB
Mendelian Mito Disease Genes	242	HDL-C	0.985861	-2.76797e-08	1.26195e-08	S-LDSC, 100kb, UKB
Other Chromosomal Proteins	281	HDL-C	0.991298	-2.38396e-08	1.00248e-08	S-LDSC, 100kb, UKB
Chromosome and TF	1804	Hypertension	2.74578e-09	1.56273e-08	2.67978e-09	S-LDSC, 100kb, UKB
Transcription Factors	1523	Hypertension	2.00406e-08	1.61469e-08	2.94088e-09	S-LDSC, 100kb, UKB
Non-zinc finger TFs	802	Hypertension	2.30031e-05	1.51867e-08	3.72675e-09	S-LDSC, 100kb, UKB
Non-KRAB zinc finger TFs	398	Hypertension	0.000311303	2.08773e-08	6.10166e-09	S-LDSC, 100kb, UKB
Lowest LOEUF Quantile	1029	Hypertension	0.000879365	8.98785e-09	2.87316e-09	S-LDSC, 100kb, UKB
Zinc finger TFs	721	Hypertension	0.00146979	1.52837e-08	5.13913e-09	S-LDSC, 100kb, UKB
All Nucleus	6263	Hypertension	0.00547173	4.62554e-09	1.81786e-09	S-LDSC, 100kb, UKB
Other Chromosomal Proteins	281	Hypertension	0.075801	8.13295e-09	5.67192e-09	S-LDSC, 100kb, UKB
Nucleoplasm	1702	Hypertension	0.0863482	2.96412e-09	2.17376e-09	S-LDSC, 100kb, UKB
Cytosol	2855	Hypertension	0.10962	2.06173e-09	1.67817e-09	S-LDSC, 100kb, UKB
Highest LOEUF Quantile	1058	Hypertension	0.167685	3.25101e-09	3.37468e-09	S-LDSC, 100kb, UKB
Cytoskeleton	1162	Hypertension	0.213627	1.64787e-09	2.07566e-09	S-LDSC, 100kb, UKB
OXPHOS Genes	129	Hypertension	0.22319	6.11561e-09	8.0314e-09	S-LDSC, 100kb, UKB
Endosome	464	Hypertension	0.249583	2.83586e-09	4.19628e-09	S-LDSC, 100kb, UKB
Other Nuclear Proteins	2034	Hypertension	0.381332	6.8726e-10	2.27582e-09	S-LDSC, 100kb, UKB
Golgi apparatus	762	Hypertension	0.460192	2.57929e-10	2.58056e-09	S-LDSC, 100kb, UKB
Extracellular space	864	Hypertension	0.488028	8.36274e-11	2.78634e-09	S-LDSC, 100kb, UKB
Nuclear Envelope	246	Hypertension	0.583593	-7.80961e-10	3.69957e-09	S-LDSC, 100kb, UKB
Lysosome	274	Hypertension	0.664618	-1.61763e-09	3.80529e-09	S-LDSC, 100kb, UKB
MitoCarta Genes	1105	Hypertension	0.679772	-1.23898e-09	2.65272e-09	S-LDSC, 100kb, UKB
KRAB zinc finger TFs	323	Hypertension	0.746549	-3.87395e-09	5.83717e-09	S-LDSC, 100kb, UKB
Nucleolus	580	Hypertension	0.808446	-2.70181e-09	3.09776e-09	S-LDSC, 100kb, UKB
Endoplasmic reticulum	1108	Hypertension	0.91248	-2.81315e-09	2.07431e-09	S-LDSC, 100kb, UKB
Plasma membrane	4191	Hypertension	0.944264	-2.61565e-09	1.64339e-09	S-LDSC, 100kb, UKB
Mendelian Mito Disease Genes	242	Hypertension	0.98054	-8.12721e-09	3.93566e-09	S-LDSC, 100kb, UKB
Chromosome and TF	1804	LDL-C	0.0347979	7.90882e-09	4.3586e-09	S-LDSC, 100kb, UKB
Transcription Factors	1523	LDL-C	0.0853479	7.84335e-09	5.72519e-09	S-LDSC, 100kb, UKB
Non-KRAB zinc finger TFs	398	LDL-C	0.0961335	1.51684e-08	1.16331e-08	S-LDSC, 100kb, UKB
All Nucleus	6263	LDL-C	0.110637	3.65116e-09	2.98505e-09	S-LDSC, 100kb, UKB
Extracellular space	864	LDL-C	0.11208	1.10328e-08	9.07642e-09	S-LDSC, 100kb, UKB
Non-zinc finger TFs	802	LDL-C	0.118912	7.44438e-09	6.30644e-09	S-LDSC, 100kb, UKB
Endoplasmic reticulum	1108	LDL-C	0.137961	7.74793e-09	7.11129e-09	S-LDSC, 100kb, UKB
Golgi apparatus	762	LDL-C	0.153499	9.16648e-09	8.9732e-09	S-LDSC, 100kb, UKB
Lysosome	274	LDL-C	0.167586	1.84407e-08	1.91343e-08	S-LDSC, 100kb, UKB
Endosome	464	LDL-C	0.176282	9.2838e-09	9.98658e-09	S-LDSC, 100kb, UKB
Zinc finger TFs	721	LDL-C	0.19205	8.10236e-09	9.30913e-09	S-LDSC, 100kb, UKB
Lowest LOEUF Quantile	1029	LDL-C	0.219907	4.79372e-09	6.20541e-09	S-LDSC, 100kb, UKB
Nucleolus	580	LDL-C	0.264631	7.83709e-09	1.2457e-08	S-LDSC, 100kb, UKB
Nucleoplasm	1702	LDL-C	0.317631	2.26632e-09	4.7779e-09	S-LDSC, 100kb, UKB
Mendelian Mito Disease Genes	242	LDL-C	0.321193	4.99149e-09	1.0749e-08	S-LDSC, 100kb, UKB
KRAB zinc finger TFs	323	LDL-C	0.344654	7.45269e-09	1.86413e-08	S-LDSC, 100kb, UKB
Cytoskeleton	1162	LDL-C	0.387678	1.24079e-09	4.34794e-09	S-LDSC, 100kb, UKB
OXPHOS Genes	129	LDL-C	0.409951	4.67072e-09	2.05153e-08	S-LDSC, 100kb, UKB
Other Chromosomal Proteins	281	LDL-C	0.411086	4.1612e-09	1.85146e-08	S-LDSC, 100kb, UKB
Nuclear Envelope	246	LDL-C	0.556481	-1.21701e-09	8.56724e-09	S-LDSC, 100kb, UKB
MitoCarta Genes	1105	LDL-C	0.662362	-2.04133e-09	4.87285e-09	S-LDSC, 100kb, UKB
Plasma membrane	4191	LDL-C	0.701197	-1.83934e-09	3.4846e-09	S-LDSC, 100kb, UKB
Cytosol	2855	LDL-C	0.735642	-2.53468e-09	4.02351e-09	S-LDSC, 100kb, UKB
Highest LOEUF Quantile	1058	LDL-C	0.851903	-5.75068e-09	5.505e-09	S-LDSC, 100kb, UKB
Other Nuclear Proteins	2034	LDL-C	0.894066	-5.6443e-09	4.52107e-09	S-LDSC, 100kb, UKB
Transcription Factors	1523	Myocardial Infarction	0.00221588	2.62882e-09	9.23795e-10	S-LDSC, 100kb, UKB
Endoplasmic reticulum	1108	Myocardial Infarction	0.00555272	2.3961e-09	9.43583e-10	S-LDSC, 100kb, UKB
Chromosome and TF	1804	Myocardial Infarction	0.00596104	2.20737e-09	8.77875e-10	S-LDSC, 100kb, UKB
Non-zinc finger TFs	802	Myocardial Infarction	0.00661289	2.7134e-09	1.09516e-09	S-LDSC, 100kb, UKB
Lowest LOEUF Quantile	1029	Myocardial Infarction	0.0384224	1.37596e-09	7.77691e-10	S-LDSC, 100kb, UKB
All Nucleus	6263	Myocardial Infarction	0.0752699	1.16622e-09	8.11208e-10	S-LDSC, 100kb, UKB
Zinc finger TFs	721	Myocardial Infarction	0.081529	1.83502e-09	1.31556e-09	S-LDSC, 100kb, UKB
Non-KRAB zinc finger TFs	398	Myocardial Infarction	0.096225	2.25869e-09	1.73297e-09	S-LDSC, 100kb, UKB
Extracellular space	864	Myocardial Infarction	0.104673	1.81838e-09	1.44849e-09	S-LDSC, 100kb, UKB
Nucleolus	580	Myocardial Infarction	0.121666	2.95718e-09	2.53465e-09	S-LDSC, 100kb, UKB
Nucleoplasm	1702	Myocardial Infarction	0.122174	1.63655e-09	1.40574e-09	S-LDSC, 100kb, UKB
KRAB zinc finger TFs	323	Myocardial Infarction	0.246706	1.12294e-09	1.63958e-09	S-LDSC, 100kb, UKB
Highest LOEUF Quantile	1058	Myocardial Infarction	0.256452	6.67109e-10	1.01954e-09	S-LDSC, 100kb, UKB
OXPHOS Genes	129	Myocardial Infarction	0.298776	1.1656e-09	2.20789e-09	S-LDSC, 100kb, UKB
Nuclear Envelope	246	Myocardial Infarction	0.352178	6.41225e-10	1.6899e-09	S-LDSC, 100kb, UKB
Cytoskeleton	1162	Myocardial Infarction	0.616196	-2.37843e-10	8.04872e-10	S-LDSC, 100kb, UKB
Other Chromosomal Proteins	281	Myocardial Infarction	0.635462	-5.56777e-10	1.60754e-09	S-LDSC, 100kb, UKB
Cytosol	2855	Myocardial Infarction	0.647846	-2.28623e-10	6.02413e-10	S-LDSC, 100kb, UKB
Lysosome	274	Myocardial Infarction	0.669217	-8.19645e-10	1.87239e-09	S-LDSC, 100kb, UKB
MitoCarta Genes	1105	Myocardial Infarction	0.691637	-4.39219e-10	8.77566e-10	S-LDSC, 100kb, UKB
Other Nuclear Proteins	2034	Myocardial Infarction	0.771995	-5.88174e-10	7.89036e-10	S-LDSC, 100kb, UKB
Golgi apparatus	762	Myocardial Infarction	0.812622	-9.32527e-10	1.05061e-09	S-LDSC, 100kb, UKB
Plasma membrane	4191	Myocardial Infarction	0.850627	-6.93569e-10	6.67454e-10	S-LDSC, 100kb, UKB
Mendelian Mito Disease Genes	242	Myocardial Infarction	0.85585	-1.52163e-09	1.43299e-09	S-LDSC, 100kb, UKB
Endosome	464	Myocardial Infarction	0.960709	-2.13777e-09	1.21535e-09	S-LDSC, 100kb, UKB
Chromosome and TF	1804	Osteoarthritis	0.00665484	2.06254e-09	8.33225e-10	S-LDSC, 100kb, UKB
Transcription Factors	1523	Osteoarthritis	0.0126623	2.06437e-09	9.23071e-10	S-LDSC, 100kb, UKB
Non-zinc finger TFs	802	Osteoarthritis	0.0268649	2.24005e-09	1.16124e-09	S-LDSC, 100kb, UKB
KRAB zinc finger TFs	323	Osteoarthritis	0.0392482	3.84667e-09	2.18626e-09	S-LDSC, 100kb, UKB
Lowest LOEUF Quantile	1029	Osteoarthritis	0.0629842	1.33102e-09	8.69834e-10	S-LDSC, 100kb, UKB
Cytosol	2855	Osteoarthritis	0.0725611	8.41226e-10	5.77377e-10	S-LDSC, 100kb, UKB
Zinc finger TFs	721	Osteoarthritis	0.0742686	1.66121e-09	1.14985e-09	S-LDSC, 100kb, UKB
Other Chromosomal Proteins	281	Osteoarthritis	0.126443	1.93272e-09	1.69037e-09	S-LDSC, 100kb, UKB
Non-KRAB zinc finger TFs	398	Osteoarthritis	0.2396	8.67941e-10	1.22662e-09	S-LDSC, 100kb, UKB
All Nucleus	6263	Osteoarthritis	0.478452	3.13551e-11	5.8023e-10	S-LDSC, 100kb, UKB
MitoCarta Genes	1105	Osteoarthritis	0.510925	-2.50905e-11	9.16084e-10	S-LDSC, 100kb, UKB
Lysosome	274	Osteoarthritis	0.55031	-2.07442e-10	1.64058e-09	S-LDSC, 100kb, UKB
Nucleolus	580	Osteoarthritis	0.586765	-2.4509e-10	1.11795e-09	S-LDSC, 100kb, UKB
Golgi apparatus	762	Osteoarthritis	0.614797	-2.88814e-10	9.89619e-10	S-LDSC, 100kb, UKB
Endosome	464	Osteoarthritis	0.647046	-4.3335e-10	1.14838e-09	S-LDSC, 100kb, UKB
Highest LOEUF Quantile	1058	Osteoarthritis	0.654564	-3.23679e-10	8.13936e-10	S-LDSC, 100kb, UKB
Other Nuclear Proteins	2034	Osteoarthritis	0.656027	-2.78749e-10	6.94019e-10	S-LDSC, 100kb, UKB
Nuclear Envelope	246	Osteoarthritis	0.72785	-8.81917e-10	1.45453e-09	S-LDSC, 100kb, UKB
Plasma membrane	4191	Osteoarthritis	0.749679	-3.46871e-10	5.15044e-10	S-LDSC, 100kb, UKB
Extracellular space	864	Osteoarthritis	0.778198	-8.98458e-10	1.17273e-09	S-LDSC, 100kb, UKB
Endoplasmic reticulum	1108	Osteoarthritis	0.817161	-8.03949e-10	8.88734e-10	S-LDSC, 100kb, UKB
OXPHOS Genes	129	Osteoarthritis	0.821981	-2.08177e-09	2.25558e-09	S-LDSC, 100kb, UKB
Nucleoplasm	1702	Osteoarthritis	0.87727	-8.466e-10	7.28917e-10	S-LDSC, 100kb, UKB
Mendelian Mito Disease Genes	242	Osteoarthritis	0.883269	-1.94828e-09	1.63517e-09	S-LDSC, 100kb, UKB
Cytoskeleton	1162	Osteoarthritis	0.886961	-8.72332e-10	7.20624e-10	S-LDSC, 100kb, UKB
All Nucleus	6263	Atrial Fibrillation	0.000473354	2.84402e-09	8.60285e-10	S-LDSC, 100kb, UKB
Chromosome and TF	1804	Atrial Fibrillation	0.00235444	4.66003e-09	1.64881e-09	S-LDSC, 100kb, UKB
Transcription Factors	1523	Atrial Fibrillation	0.00586515	4.72611e-09	1.87532e-09	S-LDSC, 100kb, UKB
Non-zinc finger TFs	802	Atrial Fibrillation	0.041934	5.40315e-09	3.12561e-09	S-LDSC, 100kb, UKB
Non-KRAB zinc finger TFs	398	Atrial Fibrillation	0.0688024	3.08438e-09	2.07734e-09	S-LDSC, 100kb, UKB
Zinc finger TFs	721	Atrial Fibrillation	0.0821045	2.25937e-09	1.62421e-09	S-LDSC, 100kb, UKB
Cytoskeleton	1162	Atrial Fibrillation	0.0935706	1.29347e-09	9.80579e-10	S-LDSC, 100kb, UKB
Other Chromosomal Proteins	281	Atrial Fibrillation	0.25409	1.50113e-09	2.26869e-09	S-LDSC, 100kb, UKB
Nucleoplasm	1702	Atrial Fibrillation	0.264221	5.63102e-10	8.93267e-10	S-LDSC, 100kb, UKB
Lysosome	274	Atrial Fibrillation	0.267373	9.05868e-10	1.45925e-09	S-LDSC, 100kb, UKB
Golgi apparatus	762	Atrial Fibrillation	0.339178	5.40034e-10	1.30221e-09	S-LDSC, 100kb, UKB
Lowest LOEUF Quantile	1029	Atrial Fibrillation	0.379113	3.20431e-10	1.04099e-09	S-LDSC, 100kb, UKB
Other Nuclear Proteins	2034	Atrial Fibrillation	0.41947	1.85875e-10	9.14515e-10	S-LDSC, 100kb, UKB
Endoplasmic reticulum	1108	Atrial Fibrillation	0.436115	1.3322e-10	8.2834e-10	S-LDSC, 100kb, UKB
Highest LOEUF Quantile	1058	Atrial Fibrillation	0.486394	3.32981e-11	9.76117e-10	S-LDSC, 100kb, UKB
Extracellular space	864	Atrial Fibrillation	0.496495	1.07242e-11	1.22054e-09	S-LDSC, 100kb, UKB
KRAB zinc finger TFs	323	Atrial Fibrillation	0.580668	-3.04781e-10	1.49694e-09	S-LDSC, 100kb, UKB
Nucleolus	580	Atrial Fibrillation	0.659704	-5.52494e-10	1.34213e-09	S-LDSC, 100kb, UKB
Nuclear Envelope	246	Atrial Fibrillation	0.689164	-8.32491e-10	1.68698e-09	S-LDSC, 100kb, UKB
Endosome	464	Atrial Fibrillation	0.702633	-8.3887e-10	1.57686e-09	S-LDSC, 100kb, UKB
OXPHOS Genes	129	Atrial Fibrillation	0.737236	-1.48239e-09	2.33504e-09	S-LDSC, 100kb, UKB
Cytosol	2855	Atrial Fibrillation	0.782022	-5.48356e-10	7.03887e-10	S-LDSC, 100kb, UKB
Mendelian Mito Disease Genes	242	Atrial Fibrillation	0.807204	-1.69396e-09	1.95238e-09	S-LDSC, 100kb, UKB
Plasma membrane	4191	Atrial Fibrillation	0.811097	-5.29693e-10	6.00596e-10	S-LDSC, 100kb, UKB
MitoCarta Genes	1105	Atrial Fibrillation	0.941907	-1.6338e-09	1.03998e-09	S-LDSC, 100kb, UKB
Non-zinc finger TFs	802	Osteoporosis/BMD	0.00900805	3.84555e-08	1.62583e-08	S-LDSC, 100kb, UKB
Transcription Factors	1523	Osteoporosis/BMD	0.0103959	2.83799e-08	1.22764e-08	S-LDSC, 100kb, UKB
Chromosome and TF	1804	Osteoporosis/BMD	0.0133271	2.4365e-08	1.09923e-08	S-LDSC, 100kb, UKB
All Nucleus	6263	Osteoporosis/BMD	0.060307	1.03893e-08	6.69324e-09	S-LDSC, 100kb, UKB
Extracellular space	864	Osteoporosis/BMD	0.13219	1.13044e-08	1.01285e-08	S-LDSC, 100kb, UKB
Non-KRAB zinc finger TFs	398	Osteoporosis/BMD	0.157234	1.5347e-08	1.52571e-08	S-LDSC, 100kb, UKB
Lowest LOEUF Quantile	1029	Osteoporosis/BMD	0.18932	9.74332e-09	1.10668e-08	S-LDSC, 100kb, UKB
Other Nuclear Proteins	2034	Osteoporosis/BMD	0.232303	7.08063e-09	9.68247e-09	S-LDSC, 100kb, UKB
Lysosome	274	Osteoporosis/BMD	0.236724	1.87432e-08	2.61455e-08	S-LDSC, 100kb, UKB
Zinc finger TFs	721	Osteoporosis/BMD	0.249716	8.6764e-09	1.28466e-08	S-LDSC, 100kb, UKB
Cytoskeleton	1162	Osteoporosis/BMD	0.272856	3.96365e-09	6.56018e-09	S-LDSC, 100kb, UKB
MitoCarta Genes	1105	Osteoporosis/BMD	0.337336	3.73678e-09	8.90249e-09	S-LDSC, 100kb, UKB
Plasma membrane	4191	Osteoporosis/BMD	0.522883	-2.32323e-10	4.04808e-09	S-LDSC, 100kb, UKB
Other Chromosomal Proteins	281	Osteoporosis/BMD	0.556907	-1.88209e-09	1.31493e-08	S-LDSC, 100kb, UKB
Mendelian Mito Disease Genes	242	Osteoporosis/BMD	0.568102	-3.0625e-09	1.78526e-08	S-LDSC, 100kb, UKB
Highest LOEUF Quantile	1058	Osteoporosis/BMD	0.62837	-3.28238e-09	1.00213e-08	S-LDSC, 100kb, UKB
Endoplasmic reticulum	1108	Osteoporosis/BMD	0.694422	-4.2823e-09	8.42269e-09	S-LDSC, 100kb, UKB
Endosome	464	Osteoporosis/BMD	0.711115	-6.20377e-09	1.11449e-08	S-LDSC, 100kb, UKB
Golgi apparatus	762	Osteoporosis/BMD	0.736363	-8.11085e-09	1.28301e-08	S-LDSC, 100kb, UKB
Nucleolus	580	Osteoporosis/BMD	0.737882	-7.26161e-09	1.14028e-08	S-LDSC, 100kb, UKB
Nucleoplasm	1702	Osteoporosis/BMD	0.773515	-4.61148e-09	6.14477e-09	S-LDSC, 100kb, UKB
Nuclear Envelope	246	Osteoporosis/BMD	0.926765	-1.39053e-08	9.57589e-09	S-LDSC, 100kb, UKB
KRAB zinc finger TFs	323	Osteoporosis/BMD	0.955181	-1.88885e-08	1.11285e-08	S-LDSC, 100kb, UKB
OXPHOS Genes	129	Osteoporosis/BMD	0.981278	-2.47777e-08	1.19073e-08	S-LDSC, 100kb, UKB
Cytosol	2855	Osteoporosis/BMD	0.989455	-1.17735e-08	5.10479e-09	S-LDSC, 100kb, UKB
Chromosome and TF	1804	Primary Skin Malignancy	0.00579284	5.76381e-09	2.28313e-09	S-LDSC, 100kb, UKB
Transcription Factors	1523	Primary Skin Malignancy	0.00946423	6.00782e-09	2.55986e-09	S-LDSC, 100kb, UKB
Non-zinc finger TFs	802	Primary Skin Malignancy	0.0118777	5.9516e-09	2.63222e-09	S-LDSC, 100kb, UKB
Cytoskeleton	1162	Primary Skin Malignancy	0.0484584	3.24415e-09	1.95432e-09	S-LDSC, 100kb, UKB
Non-KRAB zinc finger TFs	398	Primary Skin Malignancy	0.0527513	7.82912e-09	4.83654e-09	S-LDSC, 100kb, UKB
All Nucleus	6263	Primary Skin Malignancy	0.067441	1.55577e-09	1.04056e-09	S-LDSC, 100kb, UKB
Other Chromosomal Proteins	281	Primary Skin Malignancy	0.0681994	6.43882e-09	4.32328e-09	S-LDSC, 100kb, UKB
Zinc finger TFs	721	Primary Skin Malignancy	0.0870211	4.98592e-09	3.66793e-09	S-LDSC, 100kb, UKB
Cytosol	2855	Primary Skin Malignancy	0.115911	1.52166e-09	1.27263e-09	S-LDSC, 100kb, UKB
Highest LOEUF Quantile	1058	Primary Skin Malignancy	0.133939	3.64461e-09	3.28948e-09	S-LDSC, 100kb, UKB
Mendelian Mito Disease Genes	242	Primary Skin Malignancy	0.178973	2.76043e-09	3.0028e-09	S-LDSC, 100kb, UKB
Lysosome	274	Primary Skin Malignancy	0.202145	3.7385e-09	4.48269e-09	S-LDSC, 100kb, UKB
Nucleoplasm	1702	Primary Skin Malignancy	0.24943	9.75385e-10	1.44227e-09	S-LDSC, 100kb, UKB
Other Nuclear Proteins	2034	Primary Skin Malignancy	0.344176	6.72346e-10	1.67628e-09	S-LDSC, 100kb, UKB
MitoCarta Genes	1105	Primary Skin Malignancy	0.415203	4.63732e-10	2.16515e-09	S-LDSC, 100kb, UKB
Plasma membrane	4191	Primary Skin Malignancy	0.533411	-9.19391e-11	1.09649e-09	S-LDSC, 100kb, UKB
Nucleolus	580	Primary Skin Malignancy	0.643545	-9.8863e-10	2.68686e-09	S-LDSC, 100kb, UKB
Endoplasmic reticulum	1108	Primary Skin Malignancy	0.667696	-9.07564e-10	2.09328e-09	S-LDSC, 100kb, UKB
Lowest LOEUF Quantile	1029	Primary Skin Malignancy	0.743918	-1.03272e-09	1.57553e-09	S-LDSC, 100kb, UKB
Extracellular space	864	Primary Skin Malignancy	0.747763	-1.33381e-09	1.99831e-09	S-LDSC, 100kb, UKB
OXPHOS Genes	129	Primary Skin Malignancy	0.749719	-2.35884e-09	3.50181e-09	S-LDSC, 100kb, UKB
KRAB zinc finger TFs	323	Primary Skin Malignancy	0.877918	-3.27174e-09	2.80923e-09	S-LDSC, 100kb, UKB
Nuclear Envelope	246	Primary Skin Malignancy	0.913675	-4.12514e-09	3.02488e-09	S-LDSC, 100kb, UKB
Endosome	464	Primary Skin Malignancy	0.961624	-2.73909e-09	1.54764e-09	S-LDSC, 100kb, UKB
Golgi apparatus	762	Primary Skin Malignancy	0.999156	-5.47406e-09	1.7431e-09	S-LDSC, 100kb, UKB
Lowest LOEUF Quantile	1029	Raised Total Cholesterol	0.0821646	3.62612e-09	2.60749e-09	S-LDSC, 100kb, UKB
Endosome	464	Raised Total Cholesterol	0.117514	4.34087e-09	3.65544e-09	S-LDSC, 100kb, UKB
Lysosome	274	Raised Total Cholesterol	0.136188	7.17752e-09	6.53926e-09	S-LDSC, 100kb, UKB
Non-zinc finger TFs	802	Raised Total Cholesterol	0.151423	2.68212e-09	2.60312e-09	S-LDSC, 100kb, UKB
Chromosome and TF	1804	Raised Total Cholesterol	0.153064	1.90078e-09	1.85736e-09	S-LDSC, 100kb, UKB
Extracellular space	864	Raised Total Cholesterol	0.15756	4.98603e-09	4.96351e-09	S-LDSC, 100kb, UKB
Non-KRAB zinc finger TFs	398	Raised Total Cholesterol	0.197986	2.64631e-09	3.11757e-09	S-LDSC, 100kb, UKB
Transcription Factors	1523	Raised Total Cholesterol	0.198063	1.72495e-09	2.03279e-09	S-LDSC, 100kb, UKB
Endoplasmic reticulum	1108	Raised Total Cholesterol	0.211304	2.52057e-09	3.14322e-09	S-LDSC, 100kb, UKB
Nucleoplasm	1702	Raised Total Cholesterol	0.312667	8.49361e-10	1.73941e-09	S-LDSC, 100kb, UKB
Nucleolus	580	Raised Total Cholesterol	0.330164	2.29371e-09	5.2194e-09	S-LDSC, 100kb, UKB
Golgi apparatus	762	Raised Total Cholesterol	0.346071	1.37325e-09	3.46825e-09	S-LDSC, 100kb, UKB
All Nucleus	6263	Raised Total Cholesterol	0.358668	6.38055e-10	1.76248e-09	S-LDSC, 100kb, UKB
Zinc finger TFs	721	Raised Total Cholesterol	0.372644	8.95107e-10	2.75536e-09	S-LDSC, 100kb, UKB
Other Chromosomal Proteins	281	Raised Total Cholesterol	0.505396	-1.18806e-10	8.78304e-09	S-LDSC, 100kb, UKB
Nuclear Envelope	246	Raised Total Cholesterol	0.626874	-1.57544e-09	4.8687e-09	S-LDSC, 100kb, UKB
OXPHOS Genes	129	Raised Total Cholesterol	0.637678	-2.08497e-09	5.91885e-09	S-LDSC, 100kb, UKB
Mendelian Mito Disease Genes	242	Raised Total Cholesterol	0.663679	-2.24885e-09	5.32242e-09	S-LDSC, 100kb, UKB
Other Nuclear Proteins	2034	Raised Total Cholesterol	0.671753	-1.12956e-09	2.53971e-09	S-LDSC, 100kb, UKB
Plasma membrane	4191	Raised Total Cholesterol	0.713676	-1.00968e-09	1.78972e-09	S-LDSC, 100kb, UKB
Cytoskeleton	1162	Raised Total Cholesterol	0.750819	-1.34632e-09	1.98846e-09	S-LDSC, 100kb, UKB
MitoCarta Genes	1105	Raised Total Cholesterol	0.810342	-2.39495e-09	2.72414e-09	S-LDSC, 100kb, UKB
KRAB zinc finger TFs	323	Raised Total Cholesterol	0.907191	-4.85405e-09	3.66716e-09	S-LDSC, 100kb, UKB
Cytosol	2855	Raised Total Cholesterol	0.909817	-2.60962e-09	1.94802e-09	S-LDSC, 100kb, UKB
Highest LOEUF Quantile	1058	Raised Total Cholesterol	0.947441	-4.08577e-09	2.52125e-09	S-LDSC, 100kb, UKB
Transcription Factors	1523	Systolic BP	1.29282e-06	1.40782e-08	2.99456e-09	S-LDSC, 100kb, UKB
Chromosome and TF	1804	Systolic BP	6.12441e-06	1.24895e-08	2.85599e-09	S-LDSC, 100kb, UKB
Non-KRAB zinc finger TFs	398	Systolic BP	3.35775e-05	2.48432e-08	6.23239e-09	S-LDSC, 100kb, UKB
Lowest LOEUF Quantile	1029	Systolic BP	3.70937e-05	1.24279e-08	3.13643e-09	S-LDSC, 100kb, UKB
Zinc finger TFs	721	Systolic BP	0.000683804	1.63451e-08	5.1056e-09	S-LDSC, 100kb, UKB
Non-zinc finger TFs	802	Systolic BP	0.0013332	1.10971e-08	3.69438e-09	S-LDSC, 100kb, UKB
All Nucleus	6263	Systolic BP	0.00490594	5.09405e-09	1.97261e-09	S-LDSC, 100kb, UKB
Nucleoplasm	1702	Systolic BP	0.104768	3.2137e-09	2.56104e-09	S-LDSC, 100kb, UKB
Cytoskeleton	1162	Systolic BP	0.114766	2.67429e-09	2.22567e-09	S-LDSC, 100kb, UKB
Cytosol	2855	Systolic BP	0.385946	5.46868e-10	1.88641e-09	S-LDSC, 100kb, UKB
Nucleolus	580	Systolic BP	0.437485	5.85564e-10	3.72143e-09	S-LDSC, 100kb, UKB
Other Chromosomal Proteins	281	Systolic BP	0.493034	1.02909e-10	5.89287e-09	S-LDSC, 100kb, UKB
Extracellular space	864	Systolic BP	0.49855	1.0688e-11	2.94087e-09	S-LDSC, 100kb, UKB
Other Nuclear Proteins	2034	Systolic BP	0.633804	-9.39223e-10	2.7467e-09	S-LDSC, 100kb, UKB
Highest LOEUF Quantile	1058	Systolic BP	0.668122	-1.48497e-09	3.41581e-09	S-LDSC, 100kb, UKB
Endosome	464	Systolic BP	0.669399	-2.05079e-09	4.67948e-09	S-LDSC, 100kb, UKB
Golgi apparatus	762	Systolic BP	0.681906	-1.45098e-09	3.0674e-09	S-LDSC, 100kb, UKB
OXPHOS Genes	129	Systolic BP	0.709239	-3.76165e-09	6.82494e-09	S-LDSC, 100kb, UKB
Plasma membrane	4191	Systolic BP	0.769333	-1.27479e-09	1.73052e-09	S-LDSC, 100kb, UKB
Nuclear Envelope	246	Systolic BP	0.826197	-4.0094e-09	4.26875e-09	S-LDSC, 100kb, UKB
MitoCarta Genes	1105	Systolic BP	0.872848	-2.9949e-09	2.6272e-09	S-LDSC, 100kb, UKB
Endoplasmic reticulum	1108	Systolic BP	0.913899	-3.35398e-09	2.45683e-09	S-LDSC, 100kb, UKB
KRAB zinc finger TFs	323	Systolic BP	0.987636	-1.23395e-08	5.49489e-09	S-LDSC, 100kb, UKB
Mendelian Mito Disease Genes	242	Systolic BP	0.98815	-9.15678e-09	4.04815e-09	S-LDSC, 100kb, UKB
Lysosome	274	Systolic BP	0.997798	-1.21038e-08	4.25043e-09	S-LDSC, 100kb, UKB
Transcription Factors	1523	Triglycerides	0.00617981	1.25498e-08	5.01651e-09	S-LDSC, 100kb, UKB
Extracellular space	864	Triglycerides	0.0113087	3.24473e-08	1.42323e-08	S-LDSC, 100kb, UKB
Non-zinc finger TFs	802	Triglycerides	0.0228998	1.23743e-08	6.1957e-09	S-LDSC, 100kb, UKB
Lowest LOEUF Quantile	1029	Triglycerides	0.0303095	1.48002e-08	7.88814e-09	S-LDSC, 100kb, UKB
All Nucleus	6263	Triglycerides	0.0328761	5.82725e-09	3.16679e-09	S-LDSC, 100kb, UKB
Non-KRAB zinc finger TFs	398	Triglycerides	0.0464987	1.68734e-08	1.00449e-08	S-LDSC, 100kb, UKB
Chromosome and TF	1804	Triglycerides	0.0501813	7.69463e-09	4.683e-09	S-LDSC, 100kb, UKB
Nucleoplasm	1702	Triglycerides	0.0721381	8.08521e-09	5.53763e-09	S-LDSC, 100kb, UKB
Zinc finger TFs	721	Triglycerides	0.0726495	1.2035e-08	8.26387e-09	S-LDSC, 100kb, UKB
Endoplasmic reticulum	1108	Triglycerides	0.144494	5.78431e-09	5.45513e-09	S-LDSC, 100kb, UKB
Other Nuclear Proteins	2034	Triglycerides	0.216102	5.60248e-09	7.13304e-09	S-LDSC, 100kb, UKB
Endosome	464	Triglycerides	0.293135	3.53791e-09	6.50056e-09	S-LDSC, 100kb, UKB
Golgi apparatus	762	Triglycerides	0.301935	3.95002e-09	7.61313e-09	S-LDSC, 100kb, UKB
Cytosol	2855	Triglycerides	0.336263	1.68689e-09	3.99092e-09	S-LDSC, 100kb, UKB
Nuclear Envelope	246	Triglycerides	0.391958	2.49257e-09	9.08968e-09	S-LDSC, 100kb, UKB
Nucleolus	580	Triglycerides	0.56673	-1.49323e-09	8.88537e-09	S-LDSC, 100kb, UKB
Lysosome	274	Triglycerides	0.745903	-7.20061e-09	1.08828e-08	S-LDSC, 100kb, UKB
KRAB zinc finger TFs	323	Triglycerides	0.818353	-7.11111e-09	7.82211e-09	S-LDSC, 100kb, UKB
Highest LOEUF Quantile	1058	Triglycerides	0.861369	-6.47056e-09	5.95546e-09	S-LDSC, 100kb, UKB
Plasma membrane	4191	Triglycerides	0.943997	-6.41902e-09	4.03905e-09	S-LDSC, 100kb, UKB
Cytoskeleton	1162	Triglycerides	0.955813	-6.95879e-09	4.08371e-09	S-LDSC, 100kb, UKB
Other Chromosomal Proteins	281	Triglycerides	0.972457	-1.57473e-08	8.20938e-09	S-LDSC, 100kb, UKB
OXPHOS Genes	129	Triglycerides	0.974451	-2.21755e-08	1.13682e-08	S-LDSC, 100kb, UKB
MitoCarta Genes	1105	Triglycerides	0.98527	-1.0847e-08	4.98192e-09	S-LDSC, 100kb, UKB
Mendelian Mito Disease Genes	242	Triglycerides	0.995056	-2.1702e-08	8.41254e-09	S-LDSC, 100kb, UKB
Transcription Factors	1523	Type 2 Diabetes Mellitus	0.00314348	5.90992e-09	2.16288e-09	S-LDSC, 100kb, UKB
Chromosome and TF	1804	Type 2 Diabetes Mellitus	0.00447465	5.11623e-09	1.95725e-09	S-LDSC, 100kb, UKB
Non-zinc finger TFs	802	Type 2 Diabetes Mellitus	0.00574836	8.30931e-09	3.28792e-09	S-LDSC, 100kb, UKB
All Nucleus	6263	Type 2 Diabetes Mellitus	0.046215	1.85122e-09	1.10014e-09	S-LDSC, 100kb, UKB
Nucleoplasm	1702	Type 2 Diabetes Mellitus	0.0603202	2.39802e-09	1.54502e-09	S-LDSC, 100kb, UKB
Lowest LOEUF Quantile	1029	Type 2 Diabetes Mellitus	0.0679094	2.23615e-09	1.49922e-09	S-LDSC, 100kb, UKB
Extracellular space	864	Type 2 Diabetes Mellitus	0.0693585	2.55472e-09	1.72548e-09	S-LDSC, 100kb, UKB
Endoplasmic reticulum	1108	Type 2 Diabetes Mellitus	0.107119	2.71061e-09	2.18246e-09	S-LDSC, 100kb, UKB
Zinc finger TFs	721	Type 2 Diabetes Mellitus	0.12371	2.62334e-09	2.26807e-09	S-LDSC, 100kb, UKB
Non-KRAB zinc finger TFs	398	Type 2 Diabetes Mellitus	0.125306	3.13152e-09	2.72575e-09	S-LDSC, 100kb, UKB
Nuclear Envelope	246	Type 2 Diabetes Mellitus	0.349615	9.58486e-10	2.48082e-09	S-LDSC, 100kb, UKB
KRAB zinc finger TFs	323	Type 2 Diabetes Mellitus	0.353654	1.01104e-09	2.6927e-09	S-LDSC, 100kb, UKB
Other Chromosomal Proteins	281	Type 2 Diabetes Mellitus	0.449717	2.86784e-10	2.26929e-09	S-LDSC, 100kb, UKB
Cytosol	2855	Type 2 Diabetes Mellitus	0.503625	-1.05175e-11	1.15755e-09	S-LDSC, 100kb, UKB
Cytoskeleton	1162	Type 2 Diabetes Mellitus	0.519833	-6.54872e-11	1.31675e-09	S-LDSC, 100kb, UKB
Nucleolus	580	Type 2 Diabetes Mellitus	0.749878	-1.098e-09	1.62883e-09	S-LDSC, 100kb, UKB
Mendelian Mito Disease Genes	242	Type 2 Diabetes Mellitus	0.883907	-2.38957e-09	2.00007e-09	S-LDSC, 100kb, UKB
Highest LOEUF Quantile	1058	Type 2 Diabetes Mellitus	0.942558	-2.58201e-09	1.63768e-09	S-LDSC, 100kb, UKB
MitoCarta Genes	1105	Type 2 Diabetes Mellitus	0.955441	-2.59459e-09	1.52617e-09	S-LDSC, 100kb, UKB
OXPHOS Genes	129	Type 2 Diabetes Mellitus	0.960561	-5.18665e-09	2.9516e-09	S-LDSC, 100kb, UKB
Golgi apparatus	762	Type 2 Diabetes Mellitus	0.966674	-2.28029e-09	1.24333e-09	S-LDSC, 100kb, UKB
Lysosome	274	Type 2 Diabetes Mellitus	0.968156	-3.70367e-09	1.99728e-09	S-LDSC, 100kb, UKB
Endosome	464	Type 2 Diabetes Mellitus	0.969016	-3.03804e-09	1.62764e-09	S-LDSC, 100kb, UKB
Plasma membrane	4191	Type 2 Diabetes Mellitus	0.974678	-1.67919e-09	8.5915e-10	S-LDSC, 100kb, UKB
Other Nuclear Proteins	2034	Type 2 Diabetes Mellitus	0.999164	-3.58872e-09	1.14186e-09	S-LDSC, 100kb, UKB
Sigmoid Colon	2485	Cataracts	0.0645341	1.13075e-09	7.45e-10	S-LDSC, 100kb, UKB
Coronary Artery	2485	Cataracts	0.0935703	8.13151e-10	6.1645e-10	S-LDSC, 100kb, UKB
Pancreas	2485	Cataracts	0.462049	5.56685e-11	5.84306e-10	S-LDSC, 100kb, UKB
Skin - Sun Exposed	2485	Cataracts	0.608398	-1.73601e-10	6.30941e-10	S-LDSC, 100kb, UKB
Left Ventricle	2485	Cataracts	0.753331	-3.89631e-10	5.68796e-10	S-LDSC, 100kb, UKB
Atrial Appendage	2485	Cataracts	0.786225	-4.4841e-10	5.65181e-10	S-LDSC, 100kb, UKB
Visceral Adipose (Omentum)	2485	Cataracts	0.802031	-4.98854e-10	5.87649e-10	S-LDSC, 100kb, UKB
Liver	2485	Cataracts	0.855147	-5.97791e-10	5.6461e-10	S-LDSC, 100kb, UKB
Esophagus Mucosa	2485	Cataracts	0.881078	-7.28237e-10	6.16944e-10	S-LDSC, 100kb, UKB
Coronary Artery	2485	Coronary Artery Disease	0.00860407	2.59762e-09	1.09041e-09	S-LDSC, 100kb, UKB
Visceral Adipose (Omentum)	2485	Coronary Artery Disease	0.0194081	2.99181e-09	1.44803e-09	S-LDSC, 100kb, UKB
Sigmoid Colon	2485	Coronary Artery Disease	0.160378	9.91109e-10	9.98192e-10	S-LDSC, 100kb, UKB
Liver	2485	Coronary Artery Disease	0.209218	9.57086e-10	1.18285e-09	S-LDSC, 100kb, UKB
Esophagus Mucosa	2485	Coronary Artery Disease	0.270988	1.13434e-09	1.8601e-09	S-LDSC, 100kb, UKB
Atrial Appendage	2485	Coronary Artery Disease	0.342646	4.43933e-10	1.09544e-09	S-LDSC, 100kb, UKB
Skin - Sun Exposed	2485	Coronary Artery Disease	0.406321	4.08145e-10	1.72199e-09	S-LDSC, 100kb, UKB
Left Ventricle	2485	Coronary Artery Disease	0.429403	1.91472e-10	1.07633e-09	S-LDSC, 100kb, UKB
Pancreas	2485	Coronary Artery Disease	0.758293	-7.37573e-10	1.05244e-09	S-LDSC, 100kb, UKB
Pancreas	2485	Deafness	0.143818	1.29114e-09	1.21425e-09	S-LDSC, 100kb, UKB
Visceral Adipose (Omentum)	2485	Deafness	0.206517	7.3671e-10	9.00001e-10	S-LDSC, 100kb, UKB
Liver	2485	Deafness	0.323738	4.59004e-10	1.00379e-09	S-LDSC, 100kb, UKB
Skin - Sun Exposed	2485	Deafness	0.455564	1.2619e-10	1.13057e-09	S-LDSC, 100kb, UKB
Esophagus Mucosa	2485	Deafness	0.584657	-2.28146e-10	1.06699e-09	S-LDSC, 100kb, UKB
Left Ventricle	2485	Deafness	0.755228	-6.50592e-10	9.41477e-10	S-LDSC, 100kb, UKB
Sigmoid Colon	2485	Deafness	0.782035	-7.48249e-10	9.60422e-10	S-LDSC, 100kb, UKB
Atrial Appendage	2485	Deafness	0.826962	-8.95372e-10	9.50271e-10	S-LDSC, 100kb, UKB
Coronary Artery	2485	Deafness	0.905684	-1.13108e-09	8.60374e-10	S-LDSC, 100kb, UKB
Visceral Adipose (Omentum)	2485	Diaphragmatic Hernia	0.0391317	9.18389e-10	5.2156e-10	S-LDSC, 100kb, UKB
Coronary Artery	2485	Diaphragmatic Hernia	0.160991	5.31112e-10	5.36264e-10	S-LDSC, 100kb, UKB
Pancreas	2485	Diaphragmatic Hernia	0.297833	2.8301e-10	5.33333e-10	S-LDSC, 100kb, UKB
Sigmoid Colon	2485	Diaphragmatic Hernia	0.698467	-2.93382e-10	5.642e-10	S-LDSC, 100kb, UKB
Esophagus Mucosa	2485	Diaphragmatic Hernia	0.786414	-4.50483e-10	5.67332e-10	S-LDSC, 100kb, UKB
Liver	2485	Diaphragmatic Hernia	0.855713	-5.82047e-10	5.4845e-10	S-LDSC, 100kb, UKB
Left Ventricle	2485	Diaphragmatic Hernia	0.887068	-6.44615e-10	5.32264e-10	S-LDSC, 100kb, UKB
Skin - Sun Exposed	2485	Diaphragmatic Hernia	0.954082	-9.75943e-10	5.78923e-10	S-LDSC, 100kb, UKB
Atrial Appendage	2485	Diaphragmatic Hernia	0.991951	-1.2185e-09	5.06293e-10	S-LDSC, 100kb, UKB
Coronary Artery	2485	Angina	0.0138973	1.85199e-09	8.41745e-10	S-LDSC, 100kb, UKB
Visceral Adipose (Omentum)	2485	Angina	0.0325418	1.8033e-09	9.77563e-10	S-LDSC, 100kb, UKB
Atrial Appendage	2485	Angina	0.0555793	1.15429e-09	7.24598e-10	S-LDSC, 100kb, UKB
Sigmoid Colon	2485	Angina	0.065705	1.28425e-09	8.51306e-10	S-LDSC, 100kb, UKB
Left Ventricle	2485	Angina	0.117358	9.4774e-10	7.97562e-10	S-LDSC, 100kb, UKB
Liver	2485	Angina	0.27259	4.70775e-10	7.78142e-10	S-LDSC, 100kb, UKB
Skin - Sun Exposed	2485	Angina	0.34695	4.13317e-10	1.05018e-09	S-LDSC, 100kb, UKB
Esophagus Mucosa	2485	Angina	0.425199	2.09366e-10	1.11004e-09	S-LDSC, 100kb, UKB
Pancreas	2485	Angina	0.911685	-9.93399e-10	7.35195e-10	S-LDSC, 100kb, UKB
Coronary Artery	2485	Diastolic BP	0.00573081	5.48162e-09	2.16811e-09	S-LDSC, 100kb, UKB
Atrial Appendage	2485	Diastolic BP	0.00962793	4.36271e-09	1.86398e-09	S-LDSC, 100kb, UKB
Left Ventricle	2485	Diastolic BP	0.0122548	4.57111e-09	2.03247e-09	S-LDSC, 100kb, UKB
Visceral Adipose (Omentum)	2485	Diastolic BP	0.148649	2.3472e-09	2.25206e-09	S-LDSC, 100kb, UKB
Sigmoid Colon	2485	Diastolic BP	0.615968	-6.30923e-10	2.13938e-09	S-LDSC, 100kb, UKB
Liver	2485	Diastolic BP	0.619182	-6.52479e-10	2.15103e-09	S-LDSC, 100kb, UKB
Skin - Sun Exposed	2485	Diastolic BP	0.650049	-8.61441e-10	2.23489e-09	S-LDSC, 100kb, UKB
Esophagus Mucosa	2485	Diastolic BP	0.936226	-3.68258e-09	2.41664e-09	S-LDSC, 100kb, UKB
Pancreas	2485	Diastolic BP	0.943611	-3.13e-09	1.97373e-09	S-LDSC, 100kb, UKB
Sigmoid Colon	2485	Diverticular Disease	0.00490278	1.91912e-09	7.43094e-10	S-LDSC, 100kb, UKB
Coronary Artery	2485	Diverticular Disease	0.1316	8.25814e-10	7.38086e-10	S-LDSC, 100kb, UKB
Liver	2485	Diverticular Disease	0.254351	4.56014e-10	6.90032e-10	S-LDSC, 100kb, UKB
Skin - Sun Exposed	2485	Diverticular Disease	0.562092	-1.34017e-10	8.57578e-10	S-LDSC, 100kb, UKB
Left Ventricle	2485	Diverticular Disease	0.658991	-2.79935e-10	6.83249e-10	S-LDSC, 100kb, UKB
Pancreas	2485	Diverticular Disease	0.763521	-5.00938e-10	6.98001e-10	S-LDSC, 100kb, UKB
Esophagus Mucosa	2485	Diverticular Disease	0.890727	-9.37484e-10	7.61933e-10	S-LDSC, 100kb, UKB
Atrial Appendage	2485	Diverticular Disease	0.893411	-7.86501e-10	6.31791e-10	S-LDSC, 100kb, UKB
Visceral Adipose (Omentum)	2485	Diverticular Disease	0.97928	-1.35225e-09	6.63161e-10	S-LDSC, 100kb, UKB
Pancreas	2485	Glucose	0.00309897	7.12638e-09	2.6036e-09	S-LDSC, 100kb, UKB
Liver	2485	Glucose	0.00627922	8.40757e-09	3.36835e-09	S-LDSC, 100kb, UKB
Left Ventricle	2485	Glucose	0.191742	2.16293e-09	2.48185e-09	S-LDSC, 100kb, UKB
Atrial Appendage	2485	Glucose	0.219383	1.90374e-09	2.45872e-09	S-LDSC, 100kb, UKB
Visceral Adipose (Omentum)	2485	Glucose	0.515914	-1.05844e-10	2.65265e-09	S-LDSC, 100kb, UKB
Coronary Artery	2485	Glucose	0.657962	-8.31906e-10	2.04446e-09	S-LDSC, 100kb, UKB
Esophagus Mucosa	2485	Glucose	0.671951	-1.25453e-09	2.81723e-09	S-LDSC, 100kb, UKB
Sigmoid Colon	2485	Glucose	0.916984	-2.95952e-09	2.13674e-09	S-LDSC, 100kb, UKB
Skin - Sun Exposed	2485	Glucose	0.991232	-5.57265e-09	2.3461e-09	S-LDSC, 100kb, UKB
Coronary Artery	2485	GERD	0.0808718	8.43988e-10	6.0318e-10	S-LDSC, 100kb, UKB
Pancreas	2485	GERD	0.16282	5.97227e-10	6.07597e-10	S-LDSC, 100kb, UKB
Liver	2485	GERD	0.172075	5.00361e-10	5.28924e-10	S-LDSC, 100kb, UKB
Atrial Appendage	2485	GERD	0.419227	1.06299e-10	5.21402e-10	S-LDSC, 100kb, UKB
Visceral Adipose (Omentum)	2485	GERD	0.42833	9.84355e-11	5.44968e-10	S-LDSC, 100kb, UKB
Sigmoid Colon	2485	GERD	0.463625	4.64137e-11	5.08332e-10	S-LDSC, 100kb, UKB
Left Ventricle	2485	GERD	0.57138	-9.8997e-11	5.50323e-10	S-LDSC, 100kb, UKB
Esophagus Mucosa	2485	GERD	0.832174	-5.18909e-10	5.38963e-10	S-LDSC, 100kb, UKB
Skin - Sun Exposed	2485	GERD	0.920575	-7.51409e-10	5.33311e-10	S-LDSC, 100kb, UKB
Visceral Adipose (Omentum)	2485	HDL-C	2.75795e-05	2.94263e-08	7.29707e-09	S-LDSC, 100kb, UKB
Liver	2485	HDL-C	5.7085e-05	3.47487e-08	9.00618e-09	S-LDSC, 100kb, UKB
Pancreas	2485	HDL-C	0.0367914	9.86767e-09	5.51514e-09	S-LDSC, 100kb, UKB
Skin - Sun Exposed	2485	HDL-C	0.383076	2.23157e-09	7.50326e-09	S-LDSC, 100kb, UKB
Atrial Appendage	2485	HDL-C	0.575839	-1.14517e-09	5.98754e-09	S-LDSC, 100kb, UKB
Left Ventricle	2485	HDL-C	0.688524	-3.743e-09	7.6128e-09	S-LDSC, 100kb, UKB
Coronary Artery	2485	HDL-C	0.89516	-5.51584e-09	4.39703e-09	S-LDSC, 100kb, UKB
Sigmoid Colon	2485	HDL-C	0.957545	-1.07482e-08	6.23848e-09	S-LDSC, 100kb, UKB
Esophagus Mucosa	2485	HDL-C	0.986368	-1.31881e-08	5.97366e-09	S-LDSC, 100kb, UKB
Left Ventricle	2485	Hypertension	0.0131227	4.47125e-09	2.01176e-09	S-LDSC, 100kb, UKB
Atrial Appendage	2485	Hypertension	0.0726134	2.62943e-09	1.80518e-09	S-LDSC, 100kb, UKB
Visceral Adipose (Omentum)	2485	Hypertension	0.115709	2.46624e-09	2.06084e-09	S-LDSC, 100kb, UKB
Sigmoid Colon	2485	Hypertension	0.368433	7.84057e-10	2.33346e-09	S-LDSC, 100kb, UKB
Coronary Artery	2485	Hypertension	0.37453	6.42959e-10	2.01e-09	S-LDSC, 100kb, UKB
Liver	2485	Hypertension	0.591147	-4.60426e-10	1.99753e-09	S-LDSC, 100kb, UKB
Skin - Sun Exposed	2485	Hypertension	0.754799	-1.35678e-09	1.9673e-09	S-LDSC, 100kb, UKB
Esophagus Mucosa	2485	Hypertension	0.838747	-2.07466e-09	2.09705e-09	S-LDSC, 100kb, UKB
Pancreas	2485	Hypertension	0.939952	-2.70785e-09	1.74209e-09	S-LDSC, 100kb, UKB
Liver	2485	LDL-C	1.94739e-05	2.43552e-08	5.92061e-09	S-LDSC, 100kb, UKB
Pancreas	2485	LDL-C	0.0407495	6.6997e-09	3.84587e-09	S-LDSC, 100kb, UKB
Esophagus Mucosa	2485	LDL-C	0.111377	5.9351e-09	4.86788e-09	S-LDSC, 100kb, UKB
Visceral Adipose (Omentum)	2485	LDL-C	0.135144	3.80495e-09	3.45152e-09	S-LDSC, 100kb, UKB
Skin - Sun Exposed	2485	LDL-C	0.153997	5.30787e-09	5.20665e-09	S-LDSC, 100kb, UKB
Coronary Artery	2485	LDL-C	0.193687	3.29373e-09	3.81048e-09	S-LDSC, 100kb, UKB
Left Ventricle	2485	LDL-C	0.660906	-1.61321e-09	3.88785e-09	S-LDSC, 100kb, UKB
Atrial Appendage	2485	LDL-C	0.87584	-3.35357e-09	2.90493e-09	S-LDSC, 100kb, UKB
Sigmoid Colon	2485	LDL-C	0.990189	-6.84403e-09	2.93295e-09	S-LDSC, 100kb, UKB
Coronary Artery	2485	Myocardial Infarction	0.0035234	2.02976e-09	7.53261e-10	S-LDSC, 100kb, UKB
Visceral Adipose (Omentum)	2485	Myocardial Infarction	0.0208867	1.91384e-09	9.40104e-10	S-LDSC, 100kb, UKB
Liver	2485	Myocardial Infarction	0.0994769	1.04983e-09	8.17279e-10	S-LDSC, 100kb, UKB
Skin - Sun Exposed	2485	Myocardial Infarction	0.115399	1.27717e-09	1.06582e-09	S-LDSC, 100kb, UKB
Pancreas	2485	Myocardial Infarction	0.226512	5.56289e-10	7.4134e-10	S-LDSC, 100kb, UKB
Esophagus Mucosa	2485	Myocardial Infarction	0.398367	2.85298e-10	1.10763e-09	S-LDSC, 100kb, UKB
Left Ventricle	2485	Myocardial Infarction	0.433757	1.30739e-10	7.83724e-10	S-LDSC, 100kb, UKB
Atrial Appendage	2485	Myocardial Infarction	0.46953	5.8106e-11	7.60034e-10	S-LDSC, 100kb, UKB
Sigmoid Colon	2485	Myocardial Infarction	0.737277	-4.41361e-10	6.95085e-10	S-LDSC, 100kb, UKB
Sigmoid Colon	2485	Osteoarthritis	0.0320331	1.22767e-09	6.62989e-10	S-LDSC, 100kb, UKB
Liver	2485	Osteoarthritis	0.499288	1.17761e-12	6.5939e-10	S-LDSC, 100kb, UKB
Skin - Sun Exposed	2485	Osteoarthritis	0.601888	-1.78313e-10	6.90501e-10	S-LDSC, 100kb, UKB
Visceral Adipose (Omentum)	2485	Osteoarthritis	0.793188	-5.13071e-10	6.27585e-10	S-LDSC, 100kb, UKB
Coronary Artery	2485	Osteoarthritis	0.794539	-4.49228e-10	5.46326e-10	S-LDSC, 100kb, UKB
Left Ventricle	2485	Osteoarthritis	0.803687	-5.84828e-10	6.84117e-10	S-LDSC, 100kb, UKB
Pancreas	2485	Osteoarthritis	0.838109	-6.60896e-10	6.69794e-10	S-LDSC, 100kb, UKB
Atrial Appendage	2485	Osteoarthritis	0.877229	-7.49615e-10	6.45527e-10	S-LDSC, 100kb, UKB
Esophagus Mucosa	2485	Osteoarthritis	0.886342	-8.21436e-10	6.80392e-10	S-LDSC, 100kb, UKB
Sigmoid Colon	2485	Atrial Fibrillation	0.00136117	2.78792e-09	9.30092e-10	S-LDSC, 100kb, UKB
Atrial Appendage	2485	Atrial Fibrillation	0.00218294	2.95454e-09	1.03652e-09	S-LDSC, 100kb, UKB
Left Ventricle	2485	Atrial Fibrillation	0.00263171	2.34987e-09	8.42111e-10	S-LDSC, 100kb, UKB
Coronary Artery	2485	Atrial Fibrillation	0.082663	1.16265e-09	8.3802e-10	S-LDSC, 100kb, UKB
Visceral Adipose (Omentum)	2485	Atrial Fibrillation	0.537063	-7.09808e-11	7.62927e-10	S-LDSC, 100kb, UKB
Liver	2485	Atrial Fibrillation	0.658583	-3.77994e-10	9.25094e-10	S-LDSC, 100kb, UKB
Skin - Sun Exposed	2485	Atrial Fibrillation	0.823773	-7.14964e-10	7.68912e-10	S-LDSC, 100kb, UKB
Pancreas	2485	Atrial Fibrillation	0.941476	-1.02422e-09	6.53498e-10	S-LDSC, 100kb, UKB
Esophagus Mucosa	2485	Atrial Fibrillation	0.987838	-1.77952e-09	7.90207e-10	S-LDSC, 100kb, UKB
Coronary Artery	2485	Osteoporosis/BMD	0.00271713	1.67697e-08	6.03204e-09	S-LDSC, 100kb, UKB
Liver	2485	Osteoporosis/BMD	0.0722096	1.31118e-08	8.98359e-09	S-LDSC, 100kb, UKB
Sigmoid Colon	2485	Osteoporosis/BMD	0.169139	6.39735e-09	6.68079e-09	S-LDSC, 100kb, UKB
Skin - Sun Exposed	2485	Osteoporosis/BMD	0.211296	4.542e-09	5.66381e-09	S-LDSC, 100kb, UKB
Visceral Adipose (Omentum)	2485	Osteoporosis/BMD	0.275147	3.56285e-09	5.96472e-09	S-LDSC, 100kb, UKB
Atrial Appendage	2485	Osteoporosis/BMD	0.549515	-6.6973e-10	5.38212e-09	S-LDSC, 100kb, UKB
Pancreas	2485	Osteoporosis/BMD	0.627756	-1.88433e-09	5.78163e-09	S-LDSC, 100kb, UKB
Left Ventricle	2485	Osteoporosis/BMD	0.828441	-5.39191e-09	5.68754e-09	S-LDSC, 100kb, UKB
Esophagus Mucosa	2485	Osteoporosis/BMD	0.90498	-7.97799e-09	6.08793e-09	S-LDSC, 100kb, UKB
Esophagus Mucosa	2485	Primary Skin Malignancy	0.00475334	4.28145e-09	1.65098e-09	S-LDSC, 100kb, UKB
Skin - Sun Exposed	2485	Primary Skin Malignancy	0.0609892	2.66351e-09	1.72225e-09	S-LDSC, 100kb, UKB
Pancreas	2485	Primary Skin Malignancy	0.371019	4.42862e-10	1.34545e-09	S-LDSC, 100kb, UKB
Sigmoid Colon	2485	Primary Skin Malignancy	0.546289	-1.91557e-10	1.64724e-09	S-LDSC, 100kb, UKB
Left Ventricle	2485	Primary Skin Malignancy	0.565978	-2.05099e-10	1.23447e-09	S-LDSC, 100kb, UKB
Coronary Artery	2485	Primary Skin Malignancy	0.589898	-3.46864e-10	1.52613e-09	S-LDSC, 100kb, UKB
Visceral Adipose (Omentum)	2485	Primary Skin Malignancy	0.836174	-1.02603e-09	1.04819e-09	S-LDSC, 100kb, UKB
Atrial Appendage	2485	Primary Skin Malignancy	0.856564	-1.58409e-09	1.4874e-09	S-LDSC, 100kb, UKB
Liver	2485	Primary Skin Malignancy	0.883652	-1.39124e-09	1.16574e-09	S-LDSC, 100kb, UKB
Liver	2485	Raised Total Cholesterol	0.00190963	1.16298e-08	4.02038e-09	S-LDSC, 100kb, UKB
Visceral Adipose (Omentum)	2485	Raised Total Cholesterol	0.0587371	3.00911e-09	1.92219e-09	S-LDSC, 100kb, UKB
Skin - Sun Exposed	2485	Raised Total Cholesterol	0.107953	3.47177e-09	2.8055e-09	S-LDSC, 100kb, UKB
Pancreas	2485	Raised Total Cholesterol	0.154836	1.98028e-09	1.94927e-09	S-LDSC, 100kb, UKB
Coronary Artery	2485	Raised Total Cholesterol	0.228191	1.83537e-09	2.4642e-09	S-LDSC, 100kb, UKB
Esophagus Mucosa	2485	Raised Total Cholesterol	0.417672	4.42485e-10	2.12885e-09	S-LDSC, 100kb, UKB
Left Ventricle	2485	Raised Total Cholesterol	0.688974	-8.99114e-10	1.82396e-09	S-LDSC, 100kb, UKB
Atrial Appendage	2485	Raised Total Cholesterol	0.71373	-1.06427e-09	1.88595e-09	S-LDSC, 100kb, UKB
Sigmoid Colon	2485	Raised Total Cholesterol	0.982107	-3.41664e-09	1.62747e-09	S-LDSC, 100kb, UKB
Atrial Appendage	2485	Systolic BP	0.0196853	4.96231e-09	2.40855e-09	S-LDSC, 100kb, UKB
Left Ventricle	2485	Systolic BP	0.0297626	4.64459e-09	2.46489e-09	S-LDSC, 100kb, UKB
Coronary Artery	2485	Systolic BP	0.0300778	4.13208e-09	2.19832e-09	S-LDSC, 100kb, UKB
Visceral Adipose (Omentum)	2485	Systolic BP	0.0686877	3.32034e-09	2.23496e-09	S-LDSC, 100kb, UKB
Sigmoid Colon	2485	Systolic BP	0.270986	1.79589e-09	2.9449e-09	S-LDSC, 100kb, UKB
Skin - Sun Exposed	2485	Systolic BP	0.730361	-1.5272e-09	2.48768e-09	S-LDSC, 100kb, UKB
Liver	2485	Systolic BP	0.945374	-3.18376e-09	1.98791e-09	S-LDSC, 100kb, UKB
Pancreas	2485	Systolic BP	0.990222	-4.25809e-09	1.82378e-09	S-LDSC, 100kb, UKB
Esophagus Mucosa	2485	Systolic BP	0.995612	-5.76131e-09	2.19842e-09	S-LDSC, 100kb, UKB
Liver	2485	Triglycerides	0.000226503	2.54935e-08	7.26908e-09	S-LDSC, 100kb, UKB
Visceral Adipose (Omentum)	2485	Triglycerides	0.000356797	1.7397e-08	5.1405e-09	S-LDSC, 100kb, UKB
Pancreas	2485	Triglycerides	0.0493798	7.02371e-09	4.25448e-09	S-LDSC, 100kb, UKB
Left Ventricle	2485	Triglycerides	0.291647	3.68539e-09	6.71806e-09	S-LDSC, 100kb, UKB
Atrial Appendage	2485	Triglycerides	0.629541	-1.17545e-09	3.55509e-09	S-LDSC, 100kb, UKB
Coronary Artery	2485	Triglycerides	0.698687	-2.22711e-09	4.27774e-09	S-LDSC, 100kb, UKB
Skin - Sun Exposed	2485	Triglycerides	0.749588	-3.46642e-09	5.14921e-09	S-LDSC, 100kb, UKB
Sigmoid Colon	2485	Triglycerides	0.905207	-5.22379e-09	3.98214e-09	S-LDSC, 100kb, UKB
Esophagus Mucosa	2485	Triglycerides	0.992785	-1.14233e-08	4.66952e-09	S-LDSC, 100kb, UKB
Pancreas	2485	Type 2 Diabetes Mellitus	0.00273845	2.61445e-09	9.41275e-10	S-LDSC, 100kb, UKB
Liver	2485	Type 2 Diabetes Mellitus	0.0113262	2.39382e-09	1.05027e-09	S-LDSC, 100kb, UKB
Skin - Sun Exposed	2485	Type 2 Diabetes Mellitus	0.452113	1.40433e-10	1.16711e-09	S-LDSC, 100kb, UKB
Left Ventricle	2485	Type 2 Diabetes Mellitus	0.61513	-2.87546e-10	9.82338e-10	S-LDSC, 100kb, UKB
Coronary Artery	2485	Type 2 Diabetes Mellitus	0.697873	-6.06942e-10	1.17104e-09	S-LDSC, 100kb, UKB
Esophagus Mucosa	2485	Type 2 Diabetes Mellitus	0.846299	-1.15222e-09	1.12886e-09	S-LDSC, 100kb, UKB
Atrial Appendage	2485	Type 2 Diabetes Mellitus	0.851745	-1.00864e-09	9.66179e-10	S-LDSC, 100kb, UKB
Sigmoid Colon	2485	Type 2 Diabetes Mellitus	0.867176	-1.2543e-09	1.12681e-09	S-LDSC, 100kb, UKB
Visceral Adipose (Omentum)	2485	Type 2 Diabetes Mellitus	0.901028	-1.64037e-09	1.27414e-09	S-LDSC, 100kb, UKB
Non-TF Nuclear Proteins	4740	Cataracts	0.0249614	1.20437e-09	6.1428e-10	S-LDSC, 100kb, UKB
Nondevelopment Non-ZF TFs	509	Cataracts	0.366359	4.51628e-10	1.32244e-09	S-LDSC, 100kb, UKB
Non-TF Nuclear Proteins	4740	Coronary Artery Disease	0.320838	6.24488e-10	1.34195e-09	S-LDSC, 100kb, UKB
Nondevelopment Non-ZF TFs	509	Coronary Artery Disease	0.70363	-8.96056e-10	1.67528e-09	S-LDSC, 100kb, UKB
Nondevelopment Non-ZF TFs	509	Deafness	0.274539	1.311e-09	2.18812e-09	S-LDSC, 100kb, UKB
Non-TF Nuclear Proteins	4740	Deafness	0.318415	4.55854e-10	9.65518e-10	S-LDSC, 100kb, UKB
Nondevelopment Non-ZF TFs	509	Diaphragmatic Hernia	0.492635	1.80489e-11	9.77651e-10	S-LDSC, 100kb, UKB
Non-TF Nuclear Proteins	4740	Diaphragmatic Hernia	0.918853	-6.552e-10	4.68872e-10	S-LDSC, 100kb, UKB
Non-TF Nuclear Proteins	4740	Angina	0.438742	1.24018e-10	8.04481e-10	S-LDSC, 100kb, UKB
Nondevelopment Non-ZF TFs	509	Angina	0.586152	-3.19379e-10	1.46734e-09	S-LDSC, 100kb, UKB
Nondevelopment Non-ZF TFs	509	Diastolic BP	0.0166976	8.90279e-09	4.18502e-09	S-LDSC, 100kb, UKB
Non-TF Nuclear Proteins	4740	Diastolic BP	0.490653	4.2538e-11	1.81544e-09	S-LDSC, 100kb, UKB
Nondevelopment Non-ZF TFs	509	Diverticular Disease	0.2099	1.15573e-09	1.43254e-09	S-LDSC, 100kb, UKB
Non-TF Nuclear Proteins	4740	Diverticular Disease	0.457735	7.4378e-11	7.0075e-10	S-LDSC, 100kb, UKB
Nondevelopment Non-ZF TFs	509	Glucose	0.051939	1.0351e-08	6.36461e-09	S-LDSC, 100kb, UKB
Non-TF Nuclear Proteins	4740	Glucose	0.71042	-1.20562e-09	2.1738e-09	S-LDSC, 100kb, UKB
Nondevelopment Non-ZF TFs	509	GERD	0.255183	7.02237e-10	1.0668e-09	S-LDSC, 100kb, UKB
Non-TF Nuclear Proteins	4740	GERD	0.877299	-5.48912e-10	4.72552e-10	S-LDSC, 100kb, UKB
Nondevelopment Non-ZF TFs	509	HDL-C	0.151844	1.176e-08	1.14335e-08	S-LDSC, 100kb, UKB
Non-TF Nuclear Proteins	4740	HDL-C	0.689808	-2.6023e-09	5.25393e-09	S-LDSC, 100kb, UKB
Nondevelopment Non-ZF TFs	509	Hypertension	0.0143619	8.58131e-09	3.92332e-09	S-LDSC, 100kb, UKB
Non-TF Nuclear Proteins	4740	Hypertension	0.364954	6.01404e-10	1.74195e-09	S-LDSC, 100kb, UKB
Nondevelopment Non-ZF TFs	509	LDL-C	0.17675	8.61588e-09	9.28613e-09	S-LDSC, 100kb, UKB
Non-TF Nuclear Proteins	4740	LDL-C	0.397813	8.2529e-10	3.18632e-09	S-LDSC, 100kb, UKB
Nondevelopment Non-ZF TFs	509	Myocardial Infarction	0.108053	1.53954e-09	1.24462e-09	S-LDSC, 100kb, UKB
Non-TF Nuclear Proteins	4740	Myocardial Infarction	0.349891	3.24808e-10	8.4231e-10	S-LDSC, 100kb, UKB
Nondevelopment Non-ZF TFs	509	Osteoarthritis	0.0546209	2.29894e-09	1.43539e-09	S-LDSC, 100kb, UKB
Non-TF Nuclear Proteins	4740	Osteoarthritis	0.953535	-9.24154e-10	5.50047e-10	S-LDSC, 100kb, UKB
Non-TF Nuclear Proteins	4740	Atrial Fibrillation	0.187555	6.41078e-10	7.22796e-10	S-LDSC, 100kb, UKB
Nondevelopment Non-ZF TFs	509	Atrial Fibrillation	0.466729	1.22164e-10	1.46314e-09	S-LDSC, 100kb, UKB
Non-TF Nuclear Proteins	4740	Osteoporosis/BMD	0.440816	9.97573e-10	6.6996e-09	S-LDSC, 100kb, UKB
Nondevelopment Non-ZF TFs	509	Osteoporosis/BMD	0.484454	4.16662e-10	1.06896e-08	S-LDSC, 100kb, UKB
Nondevelopment Non-ZF TFs	509	Primary Skin Malignancy	0.020077	6.27972e-09	3.06005e-09	S-LDSC, 100kb, UKB
Non-TF Nuclear Proteins	4740	Primary Skin Malignancy	0.667465	-4.04005e-10	9.33201e-10	S-LDSC, 100kb, UKB
Non-TF Nuclear Proteins	4740	Raised Total Cholesterol	0.451083	2.20809e-10	1.79628e-09	S-LDSC, 100kb, UKB
Nondevelopment Non-ZF TFs	509	Raised Total Cholesterol	0.477061	1.82394e-10	3.17039e-09	S-LDSC, 100kb, UKB
Nondevelopment Non-ZF TFs	509	Systolic BP	0.00327676	1.13417e-08	4.17171e-09	S-LDSC, 100kb, UKB
Non-TF Nuclear Proteins	4740	Systolic BP	0.496328	1.86648e-11	2.02777e-09	S-LDSC, 100kb, UKB
Nondevelopment Non-ZF TFs	509	Triglycerides	0.0652465	1.18085e-08	7.80902e-09	S-LDSC, 100kb, UKB
Non-TF Nuclear Proteins	4740	Triglycerides	0.0694779	5.8698e-09	3.96691e-09	S-LDSC, 100kb, UKB
Nondevelopment Non-ZF TFs	509	Type 2 Diabetes Mellitus	0.0942873	6.49812e-09	4.94226e-09	S-LDSC, 100kb, UKB
Non-TF Nuclear Proteins	4740	Type 2 Diabetes Mellitus	0.704076	-6.18639e-10	1.15384e-09	S-LDSC, 100kb, UKB
Transcription Factors	1523	Alzheimer's Disease	0.0101437	1.49519e-08	6.44204e-09	S-LDSC, 100kb, Meta-analyses
Chromosome and TF	1804	Alzheimer's Disease	0.0141515	1.24393e-08	5.67211e-09	S-LDSC, 100kb, Meta-analyses
Skin - Sun Exposed	2485	Alzheimer's Disease	0.04209	1.08726e-08	6.29591e-09	S-LDSC, 100kb, Meta-analyses
Pancreas	2485	Alzheimer's Disease	0.0612015	9.04317e-09	5.85407e-09	S-LDSC, 100kb, Meta-analyses
Visceral Adipose (Omentum)	2485	Alzheimer's Disease	0.0898512	7.58905e-09	5.65641e-09	S-LDSC, 100kb, Meta-analyses
Coronary Artery	2485	Alzheimer's Disease	0.0955156	6.02783e-09	4.61007e-09	S-LDSC, 100kb, Meta-analyses
Sigmoid Colon	2485	Alzheimer's Disease	0.162282	4.49867e-09	4.56661e-09	S-LDSC, 100kb, Meta-analyses
Liver	2485	Alzheimer's Disease	0.256404	3.96303e-09	6.0553e-09	S-LDSC, 100kb, Meta-analyses
Esophagus Mucosa	2485	Alzheimer's Disease	0.558539	-1.02402e-09	6.95357e-09	S-LDSC, 100kb, Meta-analyses
MitoCarta Genes	1105	Alzheimer's Disease	0.585027	-1.38953e-09	6.46978e-09	S-LDSC, 100kb, Meta-analyses
Left Ventricle	2485	Alzheimer's Disease	0.755508	-3.47962e-09	5.0289e-09	S-LDSC, 100kb, Meta-analyses
Atrial Appendage	2485	Alzheimer's Disease	0.95171	-6.44904e-09	3.88107e-09	S-LDSC, 100kb, Meta-analyses
Atrial Appendage	2485	Atrial Fibrillation	6.56559e-05	8.38596e-09	2.19299e-09	S-LDSC, 100kb, Meta-analyses
Left Ventricle	2485	Atrial Fibrillation	0.00163622	5.85288e-09	1.99015e-09	S-LDSC, 100kb, Meta-analyses
Chromosome and TF	1804	Atrial Fibrillation	0.00223804	9.11222e-09	3.2057e-09	S-LDSC, 100kb, Meta-analyses
Transcription Factors	1523	Atrial Fibrillation	0.0159078	7.65528e-09	3.56603e-09	S-LDSC, 100kb, Meta-analyses
Coronary Artery	2485	Atrial Fibrillation	0.0626031	3.23911e-09	2.11253e-09	S-LDSC, 100kb, Meta-analyses
Sigmoid Colon	2485	Atrial Fibrillation	0.252437	1.49334e-09	2.23943e-09	S-LDSC, 100kb, Meta-analyses
Visceral Adipose (Omentum)	2485	Atrial Fibrillation	0.571036	-3.376e-10	1.8859e-09	S-LDSC, 100kb, Meta-analyses
Pancreas	2485	Atrial Fibrillation	0.641318	-7.29168e-10	2.01437e-09	S-LDSC, 100kb, Meta-analyses
MitoCarta Genes	1105	Atrial Fibrillation	0.760458	-2.05601e-09	2.90489e-09	S-LDSC, 100kb, Meta-analyses
Liver	2485	Atrial Fibrillation	0.823287	-1.95957e-09	2.11169e-09	S-LDSC, 100kb, Meta-analyses
Skin - Sun Exposed	2485	Atrial Fibrillation	0.825876	-1.71973e-09	1.83341e-09	S-LDSC, 100kb, Meta-analyses
Esophagus Mucosa	2485	Atrial Fibrillation	0.977744	-4.27137e-09	2.12588e-09	S-LDSC, 100kb, Meta-analyses
Coronary Artery	2485	Coronary Artery Disease	0.0390557	5.86615e-09	3.32973e-09	S-LDSC, 100kb, Meta-analyses
MitoCarta Genes	1105	Coronary Artery Disease	0.0928217	5.74289e-09	4.33892e-09	S-LDSC, 100kb, Meta-analyses
Atrial Appendage	2485	Coronary Artery Disease	0.154553	3.01176e-09	2.96112e-09	S-LDSC, 100kb, Meta-analyses
Pancreas	2485	Coronary Artery Disease	0.169006	2.97359e-09	3.10362e-09	S-LDSC, 100kb, Meta-analyses
Left Ventricle	2485	Coronary Artery Disease	0.220686	2.67217e-09	3.47091e-09	S-LDSC, 100kb, Meta-analyses
Skin - Sun Exposed	2485	Coronary Artery Disease	0.241943	2.61284e-09	3.73228e-09	S-LDSC, 100kb, Meta-analyses
Chromosome and TF	1804	Coronary Artery Disease	0.306348	2.03391e-09	4.01778e-09	S-LDSC, 100kb, Meta-analyses
Transcription Factors	1523	Coronary Artery Disease	0.346154	1.64526e-09	4.15758e-09	S-LDSC, 100kb, Meta-analyses
Sigmoid Colon	2485	Coronary Artery Disease	0.402435	7.23509e-10	2.9286e-09	S-LDSC, 100kb, Meta-analyses
Esophagus Mucosa	2485	Coronary Artery Disease	0.463414	3.52987e-10	3.84366e-09	S-LDSC, 100kb, Meta-analyses
Liver	2485	Coronary Artery Disease	0.529287	-2.22112e-10	3.02288e-09	S-LDSC, 100kb, Meta-analyses
Visceral Adipose (Omentum)	2485	Coronary Artery Disease	0.79538	-2.95656e-09	3.5827e-09	S-LDSC, 100kb, Meta-analyses
Atrial Appendage	2485	Diastolic BP	0.011645	9.91918e-09	4.3723e-09	S-LDSC, 100kb, Meta-analyses
Left Ventricle	2485	Diastolic BP	0.0141864	9.45053e-09	4.3112e-09	S-LDSC, 100kb, Meta-analyses
Coronary Artery	2485	Diastolic BP	0.0305229	6.95286e-09	3.71183e-09	S-LDSC, 100kb, Meta-analyses
Chromosome and TF	1804	Diastolic BP	0.0677118	7.10407e-09	4.75808e-09	S-LDSC, 100kb, Meta-analyses
Transcription Factors	1523	Diastolic BP	0.112024	6.1569e-09	5.06393e-09	S-LDSC, 100kb, Meta-analyses
Visceral Adipose (Omentum)	2485	Diastolic BP	0.321857	1.74412e-09	3.77098e-09	S-LDSC, 100kb, Meta-analyses
Liver	2485	Diastolic BP	0.335945	1.92512e-09	4.54517e-09	S-LDSC, 100kb, Meta-analyses
MitoCarta Genes	1105	Diastolic BP	0.418709	1.22466e-09	5.96818e-09	S-LDSC, 100kb, Meta-analyses
Sigmoid Colon	2485	Diastolic BP	0.465339	2.92285e-10	3.35991e-09	S-LDSC, 100kb, Meta-analyses
Esophagus Mucosa	2485	Diastolic BP	0.575993	-8.9336e-10	4.66136e-09	S-LDSC, 100kb, Meta-analyses
Pancreas	2485	Diastolic BP	0.577727	-7.12597e-10	3.63416e-09	S-LDSC, 100kb, Meta-analyses
Skin - Sun Exposed	2485	Diastolic BP	0.796857	-3.47511e-09	4.18462e-09	S-LDSC, 100kb, Meta-analyses
Liver	2485	eGFR	0.000188372	1.61145e-08	4.53182e-09	S-LDSC, 100kb, Meta-analyses
Pancreas	2485	eGFR	0.0113356	9.12764e-09	4.00523e-09	S-LDSC, 100kb, Meta-analyses
Coronary Artery	2485	eGFR	0.0502615	6.44567e-09	3.92472e-09	S-LDSC, 100kb, Meta-analyses
Transcription Factors	1523	eGFR	0.17857	3.68857e-09	4.00572e-09	S-LDSC, 100kb, Meta-analyses
Chromosome and TF	1804	eGFR	0.21533	2.86276e-09	3.63266e-09	S-LDSC, 100kb, Meta-analyses
MitoCarta Genes	1105	eGFR	0.31118	2.92475e-09	5.93848e-09	S-LDSC, 100kb, Meta-analyses
Atrial Appendage	2485	eGFR	0.411447	7.00668e-10	3.13042e-09	S-LDSC, 100kb, Meta-analyses
Left Ventricle	2485	eGFR	0.486335	1.14455e-10	3.3409e-09	S-LDSC, 100kb, Meta-analyses
Esophagus Mucosa	2485	eGFR	0.570727	-5.48267e-10	3.07626e-09	S-LDSC, 100kb, Meta-analyses
Sigmoid Colon	2485	eGFR	0.808498	-2.61115e-09	2.99315e-09	S-LDSC, 100kb, Meta-analyses
Visceral Adipose (Omentum)	2485	eGFR	0.810589	-2.73315e-09	3.10561e-09	S-LDSC, 100kb, Meta-analyses
Skin - Sun Exposed	2485	eGFR	0.865518	-3.62675e-09	3.28078e-09	S-LDSC, 100kb, Meta-analyses
Pancreas	2485	Glucose	0.00128976	1.37245e-08	4.55382e-09	S-LDSC, 100kb, Meta-analyses
Transcription Factors	1523	Glucose	0.00577156	1.54281e-08	6.10816e-09	S-LDSC, 100kb, Meta-analyses
Chromosome and TF	1804	Glucose	0.00781511	1.29456e-08	5.35507e-09	S-LDSC, 100kb, Meta-analyses
Liver	2485	Glucose	0.0155251	1.00034e-08	4.63886e-09	S-LDSC, 100kb, Meta-analyses
Skin - Sun Exposed	2485	Glucose	0.260851	2.79398e-09	4.36066e-09	S-LDSC, 100kb, Meta-analyses
Atrial Appendage	2485	Glucose	0.284635	2.32123e-09	4.07858e-09	S-LDSC, 100kb, Meta-analyses
MitoCarta Genes	1105	Glucose	0.300497	2.92439e-09	5.59187e-09	S-LDSC, 100kb, Meta-analyses
Esophagus Mucosa	2485	Glucose	0.38808	1.13421e-09	3.98912e-09	S-LDSC, 100kb, Meta-analyses
Left Ventricle	2485	Glucose	0.610007	-1.05555e-09	3.77876e-09	S-LDSC, 100kb, Meta-analyses
Coronary Artery	2485	Glucose	0.879089	-4.02353e-09	3.4376e-09	S-LDSC, 100kb, Meta-analyses
Sigmoid Colon	2485	Glucose	0.906109	-5.24215e-09	3.97986e-09	S-LDSC, 100kb, Meta-analyses
Visceral Adipose (Omentum)	2485	Glucose	0.976656	-8.01311e-09	4.02846e-09	S-LDSC, 100kb, Meta-analyses
Visceral Adipose (Omentum)	2485	HDL-C	2.86166e-05	2.26794e-08	5.63611e-09	S-LDSC, 100kb, Meta-analyses
Liver	2485	HDL-C	0.00429285	1.60451e-08	6.10517e-09	S-LDSC, 100kb, Meta-analyses
Transcription Factors	1523	HDL-C	0.0136632	1.23245e-08	5.58473e-09	S-LDSC, 100kb, Meta-analyses
Chromosome and TF	1804	HDL-C	0.0314768	9.32769e-09	5.01618e-09	S-LDSC, 100kb, Meta-analyses
Pancreas	2485	HDL-C	0.149896	4.33853e-09	4.18421e-09	S-LDSC, 100kb, Meta-analyses
Skin - Sun Exposed	2485	HDL-C	0.163994	4.83621e-09	4.94412e-09	S-LDSC, 100kb, Meta-analyses
Atrial Appendage	2485	HDL-C	0.399519	9.5661e-10	3.75742e-09	S-LDSC, 100kb, Meta-analyses
Left Ventricle	2485	HDL-C	0.445695	6.9671e-10	5.10239e-09	S-LDSC, 100kb, Meta-analyses
MitoCarta Genes	1105	HDL-C	0.835934	-6.46643e-09	6.61269e-09	S-LDSC, 100kb, Meta-analyses
Coronary Artery	2485	HDL-C	0.893359	-4.59352e-09	3.69078e-09	S-LDSC, 100kb, Meta-analyses
Esophagus Mucosa	2485	HDL-C	0.898971	-5.97196e-09	4.68128e-09	S-LDSC, 100kb, Meta-analyses
Sigmoid Colon	2485	HDL-C	0.971677	-7.69805e-09	4.03878e-09	S-LDSC, 100kb, Meta-analyses
Liver	2485	LDL-C	0.000179302	1.95875e-08	5.48851e-09	S-LDSC, 100kb, Meta-analyses
Visceral Adipose (Omentum)	2485	LDL-C	0.111463	5.19357e-09	4.26128e-09	S-LDSC, 100kb, Meta-analyses
Esophagus Mucosa	2485	LDL-C	0.118989	6.53499e-09	5.53787e-09	S-LDSC, 100kb, Meta-analyses
Chromosome and TF	1804	LDL-C	0.195068	5.11328e-09	5.95002e-09	S-LDSC, 100kb, Meta-analyses
Pancreas	2485	LDL-C	0.202156	3.4199e-09	4.10086e-09	S-LDSC, 100kb, Meta-analyses
Coronary Artery	2485	LDL-C	0.202472	4.05515e-09	4.86915e-09	S-LDSC, 100kb, Meta-analyses
Transcription Factors	1523	LDL-C	0.222509	4.77959e-09	6.25808e-09	S-LDSC, 100kb, Meta-analyses
Skin - Sun Exposed	2485	LDL-C	0.41729	1.22132e-09	5.84834e-09	S-LDSC, 100kb, Meta-analyses
MitoCarta Genes	1105	LDL-C	0.673967	-3.02035e-09	6.69857e-09	S-LDSC, 100kb, Meta-analyses
Sigmoid Colon	2485	LDL-C	0.946852	-6.91021e-09	4.2786e-09	S-LDSC, 100kb, Meta-analyses
Left Ventricle	2485	LDL-C	0.977993	-7.50223e-09	3.72513e-09	S-LDSC, 100kb, Meta-analyses
Atrial Appendage	2485	LDL-C	0.981305	-7.55358e-09	3.62894e-09	S-LDSC, 100kb, Meta-analyses
Liver	2485	Osteoporosis/BMD	0.00765182	3.26482e-08	1.34626e-08	S-LDSC, 100kb, Meta-analyses
Coronary Artery	2485	Osteoporosis/BMD	0.0147891	1.91992e-08	8.82442e-09	S-LDSC, 100kb, Meta-analyses
Transcription Factors	1523	Osteoporosis/BMD	0.0409086	2.95551e-08	1.69834e-08	S-LDSC, 100kb, Meta-analyses
Chromosome and TF	1804	Osteoporosis/BMD	0.0539565	2.431e-08	1.51215e-08	S-LDSC, 100kb, Meta-analyses
Sigmoid Colon	2485	Osteoporosis/BMD	0.16025	8.37522e-09	8.43062e-09	S-LDSC, 100kb, Meta-analyses
Pancreas	2485	Osteoporosis/BMD	0.163504	7.6112e-09	7.76527e-09	S-LDSC, 100kb, Meta-analyses
Skin - Sun Exposed	2485	Osteoporosis/BMD	0.185157	7.49646e-09	8.36765e-09	S-LDSC, 100kb, Meta-analyses
Visceral Adipose (Omentum)	2485	Osteoporosis/BMD	0.424783	1.46132e-09	7.70451e-09	S-LDSC, 100kb, Meta-analyses
MitoCarta Genes	1105	Osteoporosis/BMD	0.683121	-5.79463e-09	1.21623e-08	S-LDSC, 100kb, Meta-analyses
Atrial Appendage	2485	Osteoporosis/BMD	0.931138	-1.28482e-08	8.65591e-09	S-LDSC, 100kb, Meta-analyses
Esophagus Mucosa	2485	Osteoporosis/BMD	0.943299	-1.21584e-08	7.68021e-09	S-LDSC, 100kb, Meta-analyses
Left Ventricle	2485	Osteoporosis/BMD	0.956309	-1.45171e-08	8.49266e-09	S-LDSC, 100kb, Meta-analyses
MitoCarta Genes	1105	Parkinson's Disease	0.26516	6.26587e-10	9.98519e-10	S-LDSC, 100kb, Meta-analyses
Visceral Adipose (Omentum)	2485	Parkinson's Disease	0.280253	6.26051e-10	1.07552e-09	S-LDSC, 100kb, Meta-analyses
Coronary Artery	2485	Parkinson's Disease	0.325694	3.63226e-10	8.03893e-10	S-LDSC, 100kb, Meta-analyses
Esophagus Mucosa	2485	Parkinson's Disease	0.336832	3.34662e-10	7.94685e-10	S-LDSC, 100kb, Meta-analyses
Left Ventricle	2485	Parkinson's Disease	0.392609	1.68095e-10	6.16805e-10	S-LDSC, 100kb, Meta-analyses
Pancreas	2485	Parkinson's Disease	0.656309	-2.45533e-10	6.10155e-10	S-LDSC, 100kb, Meta-analyses
Atrial Appendage	2485	Parkinson's Disease	0.761703	-3.79346e-10	5.32946e-10	S-LDSC, 100kb, Meta-analyses
Skin - Sun Exposed	2485	Parkinson's Disease	0.774015	-5.20215e-10	6.9165e-10	S-LDSC, 100kb, Meta-analyses
Chromosome and TF	1804	Parkinson's Disease	0.775324	-6.15588e-10	8.13738e-10	S-LDSC, 100kb, Meta-analyses
Sigmoid Colon	2485	Parkinson's Disease	0.806375	-6.11728e-10	7.07516e-10	S-LDSC, 100kb, Meta-analyses
Transcription Factors	1523	Parkinson's Disease	0.91289	-1.27361e-09	9.37321e-10	S-LDSC, 100kb, Meta-analyses
Liver	2485	Parkinson's Disease	0.96857	-1.23799e-09	6.65518e-10	S-LDSC, 100kb, Meta-analyses
Chromosome and TF	1804	Systolic BP	0.0047123	1.20717e-08	4.64967e-09	S-LDSC, 100kb, Meta-analyses
Coronary Artery	2485	Systolic BP	0.0174359	7.28629e-09	3.45347e-09	S-LDSC, 100kb, Meta-analyses
Transcription Factors	1523	Systolic BP	0.0213511	1.01281e-08	4.99756e-09	S-LDSC, 100kb, Meta-analyses
Sigmoid Colon	2485	Systolic BP	0.117681	4.13794e-09	3.48704e-09	S-LDSC, 100kb, Meta-analyses
Left Ventricle	2485	Systolic BP	0.158364	3.52514e-09	3.5209e-09	S-LDSC, 100kb, Meta-analyses
Atrial Appendage	2485	Systolic BP	0.204189	2.94985e-09	3.56801e-09	S-LDSC, 100kb, Meta-analyses
Pancreas	2485	Systolic BP	0.321095	1.54824e-09	3.33214e-09	S-LDSC, 100kb, Meta-analyses
MitoCarta Genes	1105	Systolic BP	0.43865	8.06218e-10	5.22187e-09	S-LDSC, 100kb, Meta-analyses
Visceral Adipose (Omentum)	2485	Systolic BP	0.442308	5.37516e-10	3.70395e-09	S-LDSC, 100kb, Meta-analyses
Esophagus Mucosa	2485	Systolic BP	0.559398	-6.35803e-10	4.25447e-09	S-LDSC, 100kb, Meta-analyses
Skin - Sun Exposed	2485	Systolic BP	0.564683	-6.11344e-10	3.75397e-09	S-LDSC, 100kb, Meta-analyses
Liver	2485	Systolic BP	0.595232	-8.81642e-10	3.65791e-09	S-LDSC, 100kb, Meta-analyses
Liver	2485	Triglycerides	1.96312e-05	1.90729e-08	4.63859e-09	S-LDSC, 100kb, Meta-analyses
Visceral Adipose (Omentum)	2485	Triglycerides	0.000713179	1.57486e-08	4.938e-09	S-LDSC, 100kb, Meta-analyses
Transcription Factors	1523	Triglycerides	0.00859969	1.4788e-08	6.20712e-09	S-LDSC, 100kb, Meta-analyses
Chromosome and TF	1804	Triglycerides	0.0179012	1.12116e-08	5.34097e-09	S-LDSC, 100kb, Meta-analyses
Left Ventricle	2485	Triglycerides	0.172182	4.38644e-09	4.6389e-09	S-LDSC, 100kb, Meta-analyses
Atrial Appendage	2485	Triglycerides	0.23637	2.47311e-09	3.44431e-09	S-LDSC, 100kb, Meta-analyses
Pancreas	2485	Triglycerides	0.401868	1.00553e-09	4.04614e-09	S-LDSC, 100kb, Meta-analyses
Sigmoid Colon	2485	Triglycerides	0.483358	1.28628e-10	3.08262e-09	S-LDSC, 100kb, Meta-analyses
Coronary Artery	2485	Triglycerides	0.570415	-6.00993e-10	3.38719e-09	S-LDSC, 100kb, Meta-analyses
Skin - Sun Exposed	2485	Triglycerides	0.597038	-1.03782e-09	4.22414e-09	S-LDSC, 100kb, Meta-analyses
MitoCarta Genes	1105	Triglycerides	0.859119	-5.78531e-09	5.37483e-09	S-LDSC, 100kb, Meta-analyses
Esophagus Mucosa	2485	Triglycerides	0.957729	-7.03856e-09	4.08051e-09	S-LDSC, 100kb, Meta-analyses
Pancreas	2485	Type 2 Diabetes Mellitus	0.0319108	6.96342e-09	3.75706e-09	S-LDSC, 100kb, Meta-analyses
Chromosome and TF	1804	Type 2 Diabetes Mellitus	0.0330004	1.01329e-08	5.51175e-09	S-LDSC, 100kb, Meta-analyses
Transcription Factors	1523	Type 2 Diabetes Mellitus	0.0348639	1.11312e-08	6.13735e-09	S-LDSC, 100kb, Meta-analyses
Coronary Artery	2485	Type 2 Diabetes Mellitus	0.177305	3.38302e-09	3.65461e-09	S-LDSC, 100kb, Meta-analyses
MitoCarta Genes	1105	Type 2 Diabetes Mellitus	0.322468	2.75374e-09	5.97587e-09	S-LDSC, 100kb, Meta-analyses
Liver	2485	Type 2 Diabetes Mellitus	0.324182	1.77965e-09	3.90243e-09	S-LDSC, 100kb, Meta-analyses
Skin - Sun Exposed	2485	Type 2 Diabetes Mellitus	0.393985	1.24865e-09	4.64273e-09	S-LDSC, 100kb, Meta-analyses
Atrial Appendage	2485	Type 2 Diabetes Mellitus	0.430002	6.3677e-10	3.61045e-09	S-LDSC, 100kb, Meta-analyses
Visceral Adipose (Omentum)	2485	Type 2 Diabetes Mellitus	0.446813	5.61526e-10	4.19938e-09	S-LDSC, 100kb, Meta-analyses
Esophagus Mucosa	2485	Type 2 Diabetes Mellitus	0.710174	-2.30634e-09	4.16387e-09	S-LDSC, 100kb, Meta-analyses
Left Ventricle	2485	Type 2 Diabetes Mellitus	0.870754	-4.05816e-09	3.59142e-09	S-LDSC, 100kb, Meta-analyses
Sigmoid Colon	2485	Type 2 Diabetes Mellitus	0.974592	-7.94798e-09	4.06955e-09	S-LDSC, 100kb, Meta-analyses
Mendelian Mito Disease Genes	242	Hypertension	0.82321	-0.066315	0.071482	MAGMA, 5kb, UKB
Mendelian Mito Disease Genes	242	Primary Skin Malignancy	0.90363	-0.072	0.055274	MAGMA, 5kb, UKB
Mendelian Mito Disease Genes	242	Cataracts	0.81137	-0.044962	0.050921	MAGMA, 5kb, UKB
Mendelian Mito Disease Genes	242	Atrial Fibrillation	0.53047	-0.0040101	0.052453	MAGMA, 5kb, UKB
Mendelian Mito Disease Genes	242	Myocardial Infarction	0.71826	-0.030324	0.052492	MAGMA, 5kb, UKB
Mendelian Mito Disease Genes	242	Coronary Artery Disease	0.59288	-0.013055	0.055561	MAGMA, 5kb, UKB
Mendelian Mito Disease Genes	242	GERD	0.80048	-0.04173	0.049479	MAGMA, 5kb, UKB
Mendelian Mito Disease Genes	242	Diaphragmatic Hernia	0.23589	0.035516	0.049354	MAGMA, 5kb, UKB
Mendelian Mito Disease Genes	242	Diverticular Disease	0.96263	-0.09359	0.052513	MAGMA, 5kb, UKB
Mendelian Mito Disease Genes	242	Glucose	0.748	-0.042236	0.063207	MAGMA, 5kb, UKB
Mendelian Mito Disease Genes	242	HDL-C	0.95913	-0.14655	0.084185	MAGMA, 5kb, UKB
Mendelian Mito Disease Genes	242	Angina	0.59179	-0.012303	0.052998	MAGMA, 5kb, UKB
Mendelian Mito Disease Genes	242	LDL-C	0.94842	-0.1189	0.072952	MAGMA, 5kb, UKB
Mendelian Mito Disease Genes	242	Triglycerides	0.96591	-0.14834	0.081329	MAGMA, 5kb, UKB
Mendelian Mito Disease Genes	242	Osteoarthritis	0.33396	0.022398	0.052207	MAGMA, 5kb, UKB
Mendelian Mito Disease Genes	242	Raised Total Cholesterol	0.86831	-0.067691	0.060522	MAGMA, 5kb, UKB
Mendelian Mito Disease Genes	242	Type 2 Diabetes Mellitus	0.47747	0.0033221	0.058795	MAGMA, 5kb, UKB
Mendelian Mito Disease Genes	242	Osteoporosis/BMD	0.78689	-0.061798	0.077666	MAGMA, 5kb, UKB
Mendelian Mito Disease Genes	242	Deafness	0.74841	-0.033722	0.050368	MAGMA, 5kb, UKB
Mendelian Mito Disease Genes	242	Diastolic BP	0.78176	-0.056064	0.072045	MAGMA, 5kb, UKB
Mendelian Mito Disease Genes	242	Systolic BP	0.69672	-0.037572	0.072957	MAGMA, 5kb, UKB
Other Nuclear Proteins	1986	Hypertension	0.14202	0.029281	0.027332	MAGMA, 5kb, UKB
Other Nuclear Proteins	1986	Primary Skin Malignancy	0.90805	-0.028086	0.021134	MAGMA, 5kb, UKB
Other Nuclear Proteins	1986	Cataracts	0.28293	0.011179	0.01947	MAGMA, 5kb, UKB
Other Nuclear Proteins	1986	Atrial Fibrillation	0.31004	0.0099425	0.020056	MAGMA, 5kb, UKB
Other Nuclear Proteins	1986	Myocardial Infarction	0.83949	-0.019917	0.02007	MAGMA, 5kb, UKB
Other Nuclear Proteins	1986	Coronary Artery Disease	0.41928	0.0043284	0.021244	MAGMA, 5kb, UKB
Other Nuclear Proteins	1986	GERD	0.46213	0.0017986	0.018919	MAGMA, 5kb, UKB
Other Nuclear Proteins	1986	Diaphragmatic Hernia	0.60797	-0.0051716	0.018871	MAGMA, 5kb, UKB
Other Nuclear Proteins	1986	Diverticular Disease	0.87484	-0.023084	0.02008	MAGMA, 5kb, UKB
Other Nuclear Proteins	1986	Glucose	0.018693	0.050109	0.024071	MAGMA, 5kb, UKB
Other Nuclear Proteins	1986	HDL-C	0.23229	0.023439	0.032049	MAGMA, 5kb, UKB
Other Nuclear Proteins	1986	Angina	0.44955	0.0025693	0.020265	MAGMA, 5kb, UKB
Other Nuclear Proteins	1986	LDL-C	0.093575	0.036743	0.027854	MAGMA, 5kb, UKB
Other Nuclear Proteins	1986	Triglycerides	0.38214	0.0093214	0.031084	MAGMA, 5kb, UKB
Other Nuclear Proteins	1986	Osteoarthritis	0.59165	-0.0046273	0.019962	MAGMA, 5kb, UKB
Other Nuclear Proteins	1986	Raised Total Cholesterol	0.37376	0.0074497	0.023142	MAGMA, 5kb, UKB
Other Nuclear Proteins	1986	Type 2 Diabetes Mellitus	0.84848	-0.023177	0.022503	MAGMA, 5kb, UKB
Other Nuclear Proteins	1986	Osteoporosis/BMD	0.29277	0.016307	0.029904	MAGMA, 5kb, UKB
Other Nuclear Proteins	1986	Deafness	0.56062	-0.0029088	0.019069	MAGMA, 5kb, UKB
Other Nuclear Proteins	1986	Diastolic BP	0.72063	-0.016026	0.027408	MAGMA, 5kb, UKB
Other Nuclear Proteins	1986	Systolic BP	0.78773	-0.022164	0.027754	MAGMA, 5kb, UKB
Nuclear Envelope	242	Hypertension	0.45825	0.007669	0.073154	MAGMA, 5kb, UKB
Nuclear Envelope	242	Primary Skin Malignancy	0.57765	-0.011089	0.056606	MAGMA, 5kb, UKB
Nuclear Envelope	242	Cataracts	0.42787	0.0094807	0.052146	MAGMA, 5kb, UKB
Nuclear Envelope	242	Atrial Fibrillation	0.58021	-0.010874	0.053714	MAGMA, 5kb, UKB
Nuclear Envelope	242	Myocardial Infarction	0.035771	0.096862	0.053749	MAGMA, 5kb, UKB
Nuclear Envelope	242	Coronary Artery Disease	0.14385	0.060491	0.056895	MAGMA, 5kb, UKB
Nuclear Envelope	242	GERD	0.98861	-0.11537	0.050662	MAGMA, 5kb, UKB
Nuclear Envelope	242	Diaphragmatic Hernia	0.59301	-0.011893	0.050541	MAGMA, 5kb, UKB
Nuclear Envelope	242	Diverticular Disease	0.8272	-0.050723	0.053779	MAGMA, 5kb, UKB
Nuclear Envelope	242	Glucose	0.60033	-0.016241	0.063892	MAGMA, 5kb, UKB
Nuclear Envelope	242	HDL-C	0.24468	0.058715	0.084928	MAGMA, 5kb, UKB
Nuclear Envelope	242	Angina	0.024942	0.10635	0.054229	MAGMA, 5kb, UKB
Nuclear Envelope	242	LDL-C	0.57559	-0.014193	0.074453	MAGMA, 5kb, UKB
Nuclear Envelope	242	Triglycerides	0.32187	0.038435	0.083108	MAGMA, 5kb, UKB
Nuclear Envelope	242	Osteoarthritis	0.57228	-0.0097329	0.053427	MAGMA, 5kb, UKB
Nuclear Envelope	242	Raised Total Cholesterol	0.21359	0.049181	0.061936	MAGMA, 5kb, UKB
Nuclear Envelope	242	Type 2 Diabetes Mellitus	0.058194	0.094881	0.060426	MAGMA, 5kb, UKB
Nuclear Envelope	242	Osteoporosis/BMD	0.62935	-0.026316	0.079712	MAGMA, 5kb, UKB
Nuclear Envelope	242	Deafness	0.17013	0.048718	0.051085	MAGMA, 5kb, UKB
Nuclear Envelope	242	Diastolic BP	0.74746	-0.048811	0.073231	MAGMA, 5kb, UKB
Nuclear Envelope	242	Systolic BP	0.81106	-0.065393	0.074156	MAGMA, 5kb, UKB
Nucleolus	573	Hypertension	0.95243	-0.078502	0.047036	MAGMA, 5kb, UKB
Nucleolus	573	Primary Skin Malignancy	0.63192	-0.012256	0.036374	MAGMA, 5kb, UKB
Nucleolus	573	Cataracts	0.28389	0.019145	0.033508	MAGMA, 5kb, UKB
Nucleolus	573	Atrial Fibrillation	0.33922	0.01431	0.034516	MAGMA, 5kb, UKB
Nucleolus	573	Myocardial Infarction	0.11109	0.042167	0.03454	MAGMA, 5kb, UKB
Nucleolus	573	Coronary Artery Disease	0.31085	0.018041	0.036561	MAGMA, 5kb, UKB
Nucleolus	573	GERD	0.70881	-0.017906	0.03256	MAGMA, 5kb, UKB
Nucleolus	573	Diaphragmatic Hernia	0.02721	0.062466	0.032473	MAGMA, 5kb, UKB
Nucleolus	573	Diverticular Disease	0.43857	0.0053431	0.034559	MAGMA, 5kb, UKB
Nucleolus	573	Glucose	0.27086	0.025413	0.041646	MAGMA, 5kb, UKB
Nucleolus	573	HDL-C	0.2683	0.034036	0.055077	MAGMA, 5kb, UKB
Nucleolus	573	Angina	0.29555	0.018737	0.034875	MAGMA, 5kb, UKB
Nucleolus	573	LDL-C	0.5101	-0.0012113	0.047832	MAGMA, 5kb, UKB
Nucleolus	573	Triglycerides	0.22054	0.041125	0.053383	MAGMA, 5kb, UKB
Nucleolus	573	Osteoarthritis	0.024866	0.067411	0.034351	MAGMA, 5kb, UKB
Nucleolus	573	Raised Total Cholesterol	0.03593	0.071688	0.039824	MAGMA, 5kb, UKB
Nucleolus	573	Type 2 Diabetes Mellitus	0.49943	5.5511e-05	0.038689	MAGMA, 5kb, UKB
Nucleolus	573	Osteoporosis/BMD	0.72722	-0.030973	0.051243	MAGMA, 5kb, UKB
Nucleolus	573	Deafness	0.097237	0.042814	0.032997	MAGMA, 5kb, UKB
Nucleolus	573	Diastolic BP	0.182	0.042874	0.047227	MAGMA, 5kb, UKB
Nucleolus	573	Systolic BP	0.17006	0.045623	0.047824	MAGMA, 5kb, UKB
Nucleoplasm	1688	Hypertension	0.0077086	0.071051	0.029327	MAGMA, 5kb, UKB
Nucleoplasm	1688	Primary Skin Malignancy	0.0080369	0.054591	0.022676	MAGMA, 5kb, UKB
Nucleoplasm	1688	Cataracts	0.45015	0.0026176	0.020893	MAGMA, 5kb, UKB
Nucleoplasm	1688	Atrial Fibrillation	0.6571	-0.0087065	0.021521	MAGMA, 5kb, UKB
Nucleoplasm	1688	Myocardial Infarction	0.23905	0.015277	0.021537	MAGMA, 5kb, UKB
Nucleoplasm	1688	Coronary Artery Disease	0.23136	0.016741	0.022796	MAGMA, 5kb, UKB
Nucleoplasm	1688	GERD	0.10673	0.025257	0.0203	MAGMA, 5kb, UKB
Nucleoplasm	1688	Diaphragmatic Hernia	0.44686	0.0027053	0.02025	MAGMA, 5kb, UKB
Nucleoplasm	1688	Diverticular Disease	0.42951	0.0038276	0.021548	MAGMA, 5kb, UKB
Nucleoplasm	1688	Glucose	0.12379	0.02985	0.025815	MAGMA, 5kb, UKB
Nucleoplasm	1688	HDL-C	0.002869	0.094962	0.034372	MAGMA, 5kb, UKB
Nucleoplasm	1688	Angina	0.28206	0.012542	0.021747	MAGMA, 5kb, UKB
Nucleoplasm	1688	LDL-C	0.5557	-0.0041845	0.029871	MAGMA, 5kb, UKB
Nucleoplasm	1688	Triglycerides	0.007219	0.081575	0.033344	MAGMA, 5kb, UKB
Nucleoplasm	1688	Osteoarthritis	0.61152	-0.0060688	0.021423	MAGMA, 5kb, UKB
Nucleoplasm	1688	Raised Total Cholesterol	0.0083689	0.059412	0.024831	MAGMA, 5kb, UKB
Nucleoplasm	1688	Type 2 Diabetes Mellitus	0.014866	0.052471	0.024137	MAGMA, 5kb, UKB
Nucleoplasm	1688	Osteoporosis/BMD	0.054266	0.051363	0.032003	MAGMA, 5kb, UKB
Nucleoplasm	1688	Deafness	0.17867	0.018829	0.020456	MAGMA, 5kb, UKB
Nucleoplasm	1688	Diastolic BP	0.0050569	0.075558	0.029375	MAGMA, 5kb, UKB
Nucleoplasm	1688	Systolic BP	0.016796	0.063217	0.029748	MAGMA, 5kb, UKB
Chromosome and TF	1785	Hypertension	9.9208e-07	0.148	0.031114	MAGMA, 5kb, UKB
Chromosome and TF	1785	Primary Skin Malignancy	0.086103	0.032866	0.024074	MAGMA, 5kb, UKB
Chromosome and TF	1785	Cataracts	0.26743	0.013764	0.022178	MAGMA, 5kb, UKB
Chromosome and TF	1785	Atrial Fibrillation	0.043086	0.039201	0.022843	MAGMA, 5kb, UKB
Chromosome and TF	1785	Myocardial Infarction	0.2132	0.018184	0.022862	MAGMA, 5kb, UKB
Chromosome and TF	1785	Coronary Artery Disease	0.53528	-0.0021431	0.024199	MAGMA, 5kb, UKB
Chromosome and TF	1785	GERD	0.50089	-4.8347e-05	0.021551	MAGMA, 5kb, UKB
Chromosome and TF	1785	Diaphragmatic Hernia	0.22618	0.016154	0.021496	MAGMA, 5kb, UKB
Chromosome and TF	1785	Diverticular Disease	0.071923	0.033432	0.022872	MAGMA, 5kb, UKB
Chromosome and TF	1785	Glucose	0.012527	0.061586	0.027484	MAGMA, 5kb, UKB
Chromosome and TF	1785	HDL-C	0.0001596	0.13115	0.036431	MAGMA, 5kb, UKB
Chromosome and TF	1785	Angina	0.049833	0.038006	0.023082	MAGMA, 5kb, UKB
Chromosome and TF	1785	LDL-C	0.065984	0.047745	0.031694	MAGMA, 5kb, UKB
Chromosome and TF	1785	Triglycerides	0.0028546	0.097771	0.035368	MAGMA, 5kb, UKB
Chromosome and TF	1785	Osteoarthritis	0.1044	0.02858	0.022738	MAGMA, 5kb, UKB
Chromosome and TF	1785	Raised Total Cholesterol	0.00456	0.068732	0.026356	MAGMA, 5kb, UKB
Chromosome and TF	1785	Type 2 Diabetes Mellitus	0.00017248	0.091701	0.025617	MAGMA, 5kb, UKB
Chromosome and TF	1785	Osteoporosis/BMD	1.2051e-07	0.17606	0.034075	MAGMA, 5kb, UKB
Chromosome and TF	1785	Deafness	0.87642	-0.025277	0.021841	MAGMA, 5kb, UKB
Chromosome and TF	1785	Diastolic BP	8.2195e-06	0.13432	0.031167	MAGMA, 5kb, UKB
Chromosome and TF	1785	Systolic BP	2.4865e-07	0.15869	0.031553	MAGMA, 5kb, UKB
Other Chromosomal Proteins	272	Hypertension	0.22032	0.055956	0.072563	MAGMA, 5kb, UKB
Other Chromosomal Proteins	272	Primary Skin Malignancy	0.64071	-0.020221	0.056112	MAGMA, 5kb, UKB
Other Chromosomal Proteins	272	Cataracts	0.094443	0.067916	0.051689	MAGMA, 5kb, UKB
Other Chromosomal Proteins	272	Atrial Fibrillation	0.26741	0.033048	0.053245	MAGMA, 5kb, UKB
Other Chromosomal Proteins	272	Myocardial Infarction	0.96672	-0.097756	0.05328	MAGMA, 5kb, UKB
Other Chromosomal Proteins	272	Coronary Artery Disease	0.58029	-0.011429	0.056401	MAGMA, 5kb, UKB
Other Chromosomal Proteins	272	GERD	0.34125	0.020547	0.050228	MAGMA, 5kb, UKB
Other Chromosomal Proteins	272	Diaphragmatic Hernia	0.24925	0.033912	0.0501	MAGMA, 5kb, UKB
Other Chromosomal Proteins	272	Diverticular Disease	0.19694	0.045454	0.053311	MAGMA, 5kb, UKB
Other Chromosomal Proteins	272	Glucose	0.50294	-0.00047357	0.064277	MAGMA, 5kb, UKB
Other Chromosomal Proteins	272	HDL-C	0.49505	0.0010619	0.085547	MAGMA, 5kb, UKB
Other Chromosomal Proteins	272	Angina	0.33411	0.023059	0.053799	MAGMA, 5kb, UKB
Other Chromosomal Proteins	272	LDL-C	0.75376	-0.050842	0.074072	MAGMA, 5kb, UKB
Other Chromosomal Proteins	272	Triglycerides	0.94134	-0.12947	0.082666	MAGMA, 5kb, UKB
Other Chromosomal Proteins	272	Osteoarthritis	0.81153	-0.046825	0.052995	MAGMA, 5kb, UKB
Other Chromosomal Proteins	272	Raised Total Cholesterol	0.32142	0.028492	0.061438	MAGMA, 5kb, UKB
Other Chromosomal Proteins	272	Type 2 Diabetes Mellitus	0.03472	0.10836	0.059683	MAGMA, 5kb, UKB
Other Chromosomal Proteins	272	Osteoporosis/BMD	0.068846	0.1198	0.080701	MAGMA, 5kb, UKB
Other Chromosomal Proteins	272	Deafness	0.48612	0.0017801	0.051164	MAGMA, 5kb, UKB
Other Chromosomal Proteins	272	Diastolic BP	0.65403	-0.028944	0.073047	MAGMA, 5kb, UKB
Other Chromosomal Proteins	272	Systolic BP	0.26725	0.045947	0.07397	MAGMA, 5kb, UKB
Cytoskeleton	1159	Hypertension	0.055903	0.05576	0.035065	MAGMA, 5kb, UKB
Cytoskeleton	1159	Primary Skin Malignancy	0.53538	-0.0024077	0.027117	MAGMA, 5kb, UKB
Cytoskeleton	1159	Cataracts	0.80969	-0.021902	0.02498	MAGMA, 5kb, UKB
Cytoskeleton	1159	Atrial Fibrillation	0.22164	0.019727	0.025731	MAGMA, 5kb, UKB
Cytoskeleton	1159	Myocardial Infarction	0.15895	0.02572	0.02575	MAGMA, 5kb, UKB
Cytoskeleton	1159	Coronary Artery Disease	0.025965	0.052976	0.027253	MAGMA, 5kb, UKB
Cytoskeleton	1159	GERD	0.95754	-0.041818	0.024271	MAGMA, 5kb, UKB
Cytoskeleton	1159	Diaphragmatic Hernia	0.60482	-0.0064363	0.024211	MAGMA, 5kb, UKB
Cytoskeleton	1159	Diverticular Disease	0.58608	-0.0056032	0.025763	MAGMA, 5kb, UKB
Cytoskeleton	1159	Glucose	0.53541	-0.0027451	0.030882	MAGMA, 5kb, UKB
Cytoskeleton	1159	HDL-C	0.11597	0.049128	0.041097	MAGMA, 5kb, UKB
Cytoskeleton	1159	Angina	0.62807	-0.0084953	0.025999	MAGMA, 5kb, UKB
Cytoskeleton	1159	LDL-C	0.080683	0.050099	0.035771	MAGMA, 5kb, UKB
Cytoskeleton	1159	Triglycerides	0.38502	0.011664	0.039901	MAGMA, 5kb, UKB
Cytoskeleton	1159	Osteoarthritis	0.23064	0.018869	0.025611	MAGMA, 5kb, UKB
Cytoskeleton	1159	Raised Total Cholesterol	0.90031	-0.038102	0.029689	MAGMA, 5kb, UKB
Cytoskeleton	1159	Type 2 Diabetes Mellitus	0.2365	0.020727	0.028884	MAGMA, 5kb, UKB
Cytoskeleton	1159	Osteoporosis/BMD	0.39051	0.010689	0.038451	MAGMA, 5kb, UKB
Cytoskeleton	1159	Deafness	0.057976	0.0385	0.02449	MAGMA, 5kb, UKB
Cytoskeleton	1159	Diastolic BP	0.011366	0.079421	0.034863	MAGMA, 5kb, UKB
Cytoskeleton	1159	Systolic BP	0.0047222	0.091624	0.035297	MAGMA, 5kb, UKB
Cytosol	2842	Hypertension	0.21397	0.01868	0.023564	MAGMA, 5kb, UKB
Cytosol	2842	Primary Skin Malignancy	0.37555	0.0057797	0.018222	MAGMA, 5kb, UKB
Cytosol	2842	Cataracts	0.74485	-0.011052	0.016786	MAGMA, 5kb, UKB
Cytosol	2842	Atrial Fibrillation	0.69769	-0.0089529	0.017291	MAGMA, 5kb, UKB
Cytosol	2842	Myocardial Infarction	0.25046	0.011646	0.017304	MAGMA, 5kb, UKB
Cytosol	2842	Coronary Artery Disease	0.0065162	0.045472	0.018312	MAGMA, 5kb, UKB
Cytosol	2842	GERD	0.8987	-0.020783	0.01631	MAGMA, 5kb, UKB
Cytosol	2842	Diaphragmatic Hernia	0.95899	-0.028294	0.016268	MAGMA, 5kb, UKB
Cytosol	2842	Diverticular Disease	0.8273	-0.016335	0.017312	MAGMA, 5kb, UKB
Cytosol	2842	Glucose	0.57997	-0.0041967	0.020795	MAGMA, 5kb, UKB
Cytosol	2842	HDL-C	0.53294	-0.0022857	0.02765	MAGMA, 5kb, UKB
Cytosol	2842	Angina	0.76288	-0.012502	0.01747	MAGMA, 5kb, UKB
Cytosol	2842	LDL-C	0.55981	-0.0036154	0.024024	MAGMA, 5kb, UKB
Cytosol	2842	Triglycerides	0.65744	-0.010884	0.02684	MAGMA, 5kb, UKB
Cytosol	2842	Osteoarthritis	0.30755	0.0086534	0.01721	MAGMA, 5kb, UKB
Cytosol	2842	Raised Total Cholesterol	0.52594	-0.0012981	0.019951	MAGMA, 5kb, UKB
Cytosol	2842	Type 2 Diabetes Mellitus	0.53986	-0.0019392	0.019374	MAGMA, 5kb, UKB
Cytosol	2842	Osteoporosis/BMD	0.64568	-0.0096689	0.025873	MAGMA, 5kb, UKB
Cytosol	2842	Deafness	0.86327	-0.01807	0.016499	MAGMA, 5kb, UKB
Cytosol	2842	Diastolic BP	0.077987	0.033524	0.023628	MAGMA, 5kb, UKB
Cytosol	2842	Systolic BP	0.25477	0.015781	0.023927	MAGMA, 5kb, UKB
Endoplasmic reticulum	1086	Hypertension	0.69722	-0.018428	0.035684	MAGMA, 5kb, UKB
Endoplasmic reticulum	1086	Primary Skin Malignancy	0.27893	0.016164	0.027581	MAGMA, 5kb, UKB
Endoplasmic reticulum	1086	Cataracts	0.51303	-0.00082981	0.025408	MAGMA, 5kb, UKB
Endoplasmic reticulum	1086	Atrial Fibrillation	0.19783	0.022231	0.026172	MAGMA, 5kb, UKB
Endoplasmic reticulum	1086	Myocardial Infarction	0.10291	0.033136	0.026191	MAGMA, 5kb, UKB
Endoplasmic reticulum	1086	Coronary Artery Disease	0.009773	0.064728	0.027719	MAGMA, 5kb, UKB
Endoplasmic reticulum	1086	GERD	0.19616	0.02112	0.024689	MAGMA, 5kb, UKB
Endoplasmic reticulum	1086	Diaphragmatic Hernia	0.18013	0.022529	0.024626	MAGMA, 5kb, UKB
Endoplasmic reticulum	1086	Diverticular Disease	0.37366	0.008443	0.026205	MAGMA, 5kb, UKB
Endoplasmic reticulum	1086	Glucose	0.024554	0.061672	0.03134	MAGMA, 5kb, UKB
Endoplasmic reticulum	1086	HDL-C	0.0047171	0.10829	0.041711	MAGMA, 5kb, UKB
Endoplasmic reticulum	1086	Angina	0.27159	0.016086	0.026456	MAGMA, 5kb, UKB
Endoplasmic reticulum	1086	LDL-C	0.0079612	0.087559	0.036317	MAGMA, 5kb, UKB
Endoplasmic reticulum	1086	Triglycerides	0.0015224	0.12009	0.04052	MAGMA, 5kb, UKB
Endoplasmic reticulum	1086	Osteoarthritis	0.12456	0.030035	0.02606	MAGMA, 5kb, UKB
Endoplasmic reticulum	1086	Raised Total Cholesterol	0.13042	0.033971	0.030212	MAGMA, 5kb, UKB
Endoplasmic reticulum	1086	Type 2 Diabetes Mellitus	0.19843	0.024892	0.029379	MAGMA, 5kb, UKB
Endoplasmic reticulum	1086	Osteoporosis/BMD	0.16193	0.038484	0.039008	MAGMA, 5kb, UKB
Endoplasmic reticulum	1086	Deafness	0.70254	-0.013223	0.024867	MAGMA, 5kb, UKB
Endoplasmic reticulum	1086	Diastolic BP	0.76188	-0.025404	0.035661	MAGMA, 5kb, UKB
Endoplasmic reticulum	1086	Systolic BP	0.84176	-0.036133	0.036071	MAGMA, 5kb, UKB
Endosome	460	Hypertension	0.42198	0.010948	0.055621	MAGMA, 5kb, UKB
Endosome	460	Primary Skin Malignancy	0.50064	-6.9307e-05	0.043009	MAGMA, 5kb, UKB
Endosome	460	Cataracts	0.68708	-0.019318	0.03962	MAGMA, 5kb, UKB
Endosome	460	Atrial Fibrillation	0.51888	-0.0019326	0.040811	MAGMA, 5kb, UKB
Endosome	460	Myocardial Infarction	0.88708	-0.049466	0.04084	MAGMA, 5kb, UKB
Endosome	460	Coronary Artery Disease	0.80272	-0.036805	0.043229	MAGMA, 5kb, UKB
Endosome	460	GERD	0.14214	0.041222	0.038497	MAGMA, 5kb, UKB
Endosome	460	Diaphragmatic Hernia	0.23411	0.027855	0.0384	MAGMA, 5kb, UKB
Endosome	460	Diverticular Disease	0.59533	-0.0098597	0.040862	MAGMA, 5kb, UKB
Endosome	460	Glucose	0.67689	-0.022431	0.048867	MAGMA, 5kb, UKB
Endosome	460	HDL-C	0.017956	0.13628	0.064956	MAGMA, 5kb, UKB
Endosome	460	Angina	0.36542	0.014186	0.041237	MAGMA, 5kb, UKB
Endosome	460	LDL-C	0.00079348	0.17859	0.056538	MAGMA, 5kb, UKB
Endosome	460	Triglycerides	0.078257	0.089478	0.063148	MAGMA, 5kb, UKB
Endosome	460	Osteoarthritis	0.24342	0.028246	0.040622	MAGMA, 5kb, UKB
Endosome	460	Raised Total Cholesterol	0.054986	0.075268	0.047089	MAGMA, 5kb, UKB
Endosome	460	Type 2 Diabetes Mellitus	0.21365	0.0363	0.045728	MAGMA, 5kb, UKB
Endosome	460	Osteoporosis/BMD	0.2213	0.046283	0.060278	MAGMA, 5kb, UKB
Endosome	460	Deafness	0.52867	-0.0027804	0.038654	MAGMA, 5kb, UKB
Endosome	460	Diastolic BP	0.64585	-0.020816	0.055634	MAGMA, 5kb, UKB
Endosome	460	Systolic BP	0.6156	-0.016561	0.056338	MAGMA, 5kb, UKB
Extracellular space	856	Hypertension	0.63259	-0.014422	0.042578	MAGMA, 5kb, UKB
Extracellular space	856	Primary Skin Malignancy	0.97044	-0.062134	0.03292	MAGMA, 5kb, UKB
Extracellular space	856	Cataracts	0.4583	0.0031764	0.030329	MAGMA, 5kb, UKB
Extracellular space	856	Atrial Fibrillation	0.92105	-0.044117	0.031239	MAGMA, 5kb, UKB
Extracellular space	856	Myocardial Infarction	0.32811	0.013917	0.031264	MAGMA, 5kb, UKB
Extracellular space	856	Coronary Artery Disease	0.24983	0.022338	0.033092	MAGMA, 5kb, UKB
Extracellular space	856	GERD	0.65786	-0.011984	0.029471	MAGMA, 5kb, UKB
Extracellular space	856	Diaphragmatic Hernia	0.096135	0.038328	0.029394	MAGMA, 5kb, UKB
Extracellular space	856	Diverticular Disease	0.65874	-0.012794	0.03128	MAGMA, 5kb, UKB
Extracellular space	856	Glucose	0.8124	-0.033107	0.037333	MAGMA, 5kb, UKB
Extracellular space	856	HDL-C	0.79185	-0.040375	0.04967	MAGMA, 5kb, UKB
Extracellular space	856	Angina	0.87265	-0.035955	0.031566	MAGMA, 5kb, UKB
Extracellular space	856	LDL-C	0.4483	0.005634	0.043351	MAGMA, 5kb, UKB
Extracellular space	856	Triglycerides	0.42132	0.0096061	0.048388	MAGMA, 5kb, UKB
Extracellular space	856	Osteoarthritis	0.9991	-0.097009	0.031087	MAGMA, 5kb, UKB
Extracellular space	856	Raised Total Cholesterol	0.74288	-0.023514	0.036049	MAGMA, 5kb, UKB
Extracellular space	856	Type 2 Diabetes Mellitus	0.85179	-0.036624	0.035075	MAGMA, 5kb, UKB
Extracellular space	856	Osteoporosis/BMD	0.65843	-0.018975	0.046486	MAGMA, 5kb, UKB
Extracellular space	856	Deafness	0.32853	0.013161	0.029644	MAGMA, 5kb, UKB
Extracellular space	856	Diastolic BP	0.84584	-0.043242	0.042444	MAGMA, 5kb, UKB
Extracellular space	856	Systolic BP	0.85293	-0.045092	0.042981	MAGMA, 5kb, UKB
Golgi apparatus	755	Hypertension	0.66641	-0.018785	0.043683	MAGMA, 5kb, UKB
Golgi apparatus	755	Primary Skin Malignancy	0.92807	-0.04937	0.033777	MAGMA, 5kb, UKB
Golgi apparatus	755	Cataracts	0.0036928	0.083355	0.031111	MAGMA, 5kb, UKB
Golgi apparatus	755	Atrial Fibrillation	0.21118	0.025718	0.032053	MAGMA, 5kb, UKB
Golgi apparatus	755	Myocardial Infarction	0.17577	0.029883	0.032077	MAGMA, 5kb, UKB
Golgi apparatus	755	Coronary Artery Disease	0.48453	0.001317	0.033953	MAGMA, 5kb, UKB
Golgi apparatus	755	GERD	0.35275	0.011427	0.030237	MAGMA, 5kb, UKB
Golgi apparatus	755	Diaphragmatic Hernia	0.96167	-0.053393	0.030157	MAGMA, 5kb, UKB
Golgi apparatus	755	Diverticular Disease	0.72883	-0.019554	0.032093	MAGMA, 5kb, UKB
Golgi apparatus	755	Glucose	0.048957	0.06389	0.038601	MAGMA, 5kb, UKB
Golgi apparatus	755	HDL-C	0.063884	0.078284	0.0514	MAGMA, 5kb, UKB
Golgi apparatus	755	Angina	0.0099518	0.075396	0.032381	MAGMA, 5kb, UKB
Golgi apparatus	755	LDL-C	0.010709	0.10255	0.044573	MAGMA, 5kb, UKB
Golgi apparatus	755	Triglycerides	0.017444	0.1049	0.04972	MAGMA, 5kb, UKB
Golgi apparatus	755	Osteoarthritis	0.34613	0.012627	0.031903	MAGMA, 5kb, UKB
Golgi apparatus	755	Raised Total Cholesterol	0.40741	0.0086629	0.036985	MAGMA, 5kb, UKB
Golgi apparatus	755	Type 2 Diabetes Mellitus	0.92144	-0.050842	0.035933	MAGMA, 5kb, UKB
Golgi apparatus	755	Osteoporosis/BMD	0.80577	-0.041186	0.047756	MAGMA, 5kb, UKB
Golgi apparatus	755	Deafness	0.1792	0.028062	0.030555	MAGMA, 5kb, UKB
Golgi apparatus	755	Diastolic BP	0.72919	-0.026722	0.04378	MAGMA, 5kb, UKB
Golgi apparatus	755	Systolic BP	0.6098	-0.01236	0.044333	MAGMA, 5kb, UKB
Transcription Factors	1513	Hypertension	7.6631e-07	0.16256	0.033806	MAGMA, 5kb, UKB
Transcription Factors	1513	Primary Skin Malignancy	0.04934	0.043194	0.026156	MAGMA, 5kb, UKB
Transcription Factors	1513	Cataracts	0.47536	0.0014891	0.024098	MAGMA, 5kb, UKB
Transcription Factors	1513	Atrial Fibrillation	0.057622	0.039095	0.02482	MAGMA, 5kb, UKB
Transcription Factors	1513	Myocardial Infarction	0.042764	0.042712	0.024839	MAGMA, 5kb, UKB
Transcription Factors	1513	Coronary Artery Disease	0.5007	-4.6317e-05	0.026293	MAGMA, 5kb, UKB
Transcription Factors	1513	GERD	0.57657	-0.0045224	0.023415	MAGMA, 5kb, UKB
Transcription Factors	1513	Diaphragmatic Hernia	0.3082	0.011701	0.023356	MAGMA, 5kb, UKB
Transcription Factors	1513	Diverticular Disease	0.11691	0.02959	0.024852	MAGMA, 5kb, UKB
Transcription Factors	1513	Glucose	0.0074003	0.072766	0.029853	MAGMA, 5kb, UKB
Transcription Factors	1513	HDL-C	4.788e-05	0.15429	0.039541	MAGMA, 5kb, UKB
Transcription Factors	1513	Angina	0.056016	0.039856	0.025079	MAGMA, 5kb, UKB
Transcription Factors	1513	LDL-C	0.025184	0.067419	0.034451	MAGMA, 5kb, UKB
Transcription Factors	1513	Triglycerides	9.4383e-05	0.14355	0.038439	MAGMA, 5kb, UKB
Transcription Factors	1513	Osteoarthritis	0.037736	0.043918	0.024705	MAGMA, 5kb, UKB
Transcription Factors	1513	Raised Total Cholesterol	0.0044359	0.07495	0.028637	MAGMA, 5kb, UKB
Transcription Factors	1513	Type 2 Diabetes Mellitus	0.0011727	0.084742	0.027847	MAGMA, 5kb, UKB
Transcription Factors	1513	Osteoporosis/BMD	4.3904e-07	0.18168	0.036934	MAGMA, 5kb, UKB
Transcription Factors	1513	Deafness	0.89815	-0.030106	0.023685	MAGMA, 5kb, UKB
Transcription Factors	1513	Diastolic BP	5.9662e-07	0.16421	0.033798	MAGMA, 5kb, UKB
Transcription Factors	1513	Systolic BP	1.2025e-07	0.17682	0.03422	MAGMA, 5kb, UKB
Broadly expressed TFs	856	Hypertension	0.039312	0.07652	0.043506	MAGMA, 5kb, UKB
Broadly expressed TFs	856	Primary Skin Malignancy	0.03545	0.060761	0.03364	MAGMA, 5kb, UKB
Broadly expressed TFs	856	Cataracts	0.33564	0.013153	0.030992	MAGMA, 5kb, UKB
Broadly expressed TFs	856	Atrial Fibrillation	0.17805	0.029461	0.031923	MAGMA, 5kb, UKB
Broadly expressed TFs	856	Myocardial Infarction	0.1015	0.040672	0.031947	MAGMA, 5kb, UKB
Broadly expressed TFs	856	Coronary Artery Disease	0.50731	-0.00061957	0.033816	MAGMA, 5kb, UKB
Broadly expressed TFs	856	GERD	0.88159	-0.035626	0.030114	MAGMA, 5kb, UKB
Broadly expressed TFs	856	Diaphragmatic Hernia	0.37611	0.0094835	0.030038	MAGMA, 5kb, UKB
Broadly expressed TFs	856	Diverticular Disease	0.077996	0.045346	0.031962	MAGMA, 5kb, UKB
Broadly expressed TFs	856	Glucose	0.021347	0.077597	0.038284	MAGMA, 5kb, UKB
Broadly expressed TFs	856	HDL-C	1.0843e-05	0.21576	0.050791	MAGMA, 5kb, UKB
Broadly expressed TFs	856	Angina	0.032811	0.059385	0.032255	MAGMA, 5kb, UKB
Broadly expressed TFs	856	LDL-C	0.028204	0.08439	0.04423	MAGMA, 5kb, UKB
Broadly expressed TFs	856	Triglycerides	1.741e-05	0.20446	0.049381	MAGMA, 5kb, UKB
Broadly expressed TFs	856	Osteoarthritis	0.25754	0.020685	0.031777	MAGMA, 5kb, UKB
Broadly expressed TFs	856	Raised Total Cholesterol	0.071332	0.054003	0.036837	MAGMA, 5kb, UKB
Broadly expressed TFs	856	Type 2 Diabetes Mellitus	0.02392	0.070827	0.03579	MAGMA, 5kb, UKB
Broadly expressed TFs	856	Osteoporosis/BMD	0.0010324	0.1465	0.047545	MAGMA, 5kb, UKB
Broadly expressed TFs	856	Deafness	0.87085	-0.034436	0.030462	MAGMA, 5kb, UKB
Broadly expressed TFs	856	Diastolic BP	0.00050833	0.14299	0.043509	MAGMA, 5kb, UKB
Broadly expressed TFs	856	Systolic BP	0.00063969	0.14191	0.044056	MAGMA, 5kb, UKB
Disease TFs	297	Hypertension	8.6325e-05	0.26568	0.070718	MAGMA, 5kb, UKB
Disease TFs	297	Primary Skin Malignancy	0.06639	0.082237	0.054704	MAGMA, 5kb, UKB
Disease TFs	297	Cataracts	0.4018	0.012534	0.050398	MAGMA, 5kb, UKB
Disease TFs	297	Atrial Fibrillation	2.165e-05	0.21223	0.051887	MAGMA, 5kb, UKB
Disease TFs	297	Myocardial Infarction	0.0086057	0.12375	0.051943	MAGMA, 5kb, UKB
Disease TFs	297	Coronary Artery Disease	0.24818	0.037406	0.054989	MAGMA, 5kb, UKB
Disease TFs	297	GERD	0.23684	0.035089	0.04897	MAGMA, 5kb, UKB
Disease TFs	297	Diaphragmatic Hernia	0.47159	0.003481	0.048847	MAGMA, 5kb, UKB
Disease TFs	297	Diverticular Disease	0.066751	0.077988	0.051974	MAGMA, 5kb, UKB
Disease TFs	297	Glucose	0.031891	0.11548	0.062291	MAGMA, 5kb, UKB
Disease TFs	297	HDL-C	0.008378	0.19772	0.08265	MAGMA, 5kb, UKB
Disease TFs	297	Angina	0.28151	0.030337	0.052452	MAGMA, 5kb, UKB
Disease TFs	297	LDL-C	0.0044792	0.18831	0.07204	MAGMA, 5kb, UKB
Disease TFs	297	Triglycerides	0.0060399	0.20184	0.080412	MAGMA, 5kb, UKB
Disease TFs	297	Osteoarthritis	0.32404	0.023585	0.05167	MAGMA, 5kb, UKB
Disease TFs	297	Raised Total Cholesterol	0.011723	0.13573	0.059892	MAGMA, 5kb, UKB
Disease TFs	297	Type 2 Diabetes Mellitus	0.0288	0.11051	0.058198	MAGMA, 5kb, UKB
Disease TFs	297	Osteoporosis/BMD	3.2618e-06	0.3471	0.076959	MAGMA, 5kb, UKB
Disease TFs	297	Deafness	0.88892	-0.060162	0.049279	MAGMA, 5kb, UKB
Disease TFs	297	Diastolic BP	6.0512e-05	0.27257	0.070889	MAGMA, 5kb, UKB
Disease TFs	297	Systolic BP	4.8902e-05	0.27974	0.071785	MAGMA, 5kb, UKB
Development TFs	343	Hypertension	1.6844e-08	0.38098	0.068972	MAGMA, 5kb, UKB
Development TFs	343	Primary Skin Malignancy	0.12755	0.060755	0.053382	MAGMA, 5kb, UKB
Development TFs	343	Cataracts	0.47808	0.0027031	0.049178	MAGMA, 5kb, UKB
Development TFs	343	Atrial Fibrillation	2.0392e-05	0.20779	0.050631	MAGMA, 5kb, UKB
Development TFs	343	Myocardial Infarction	0.034995	0.091855	0.05069	MAGMA, 5kb, UKB
Development TFs	343	Coronary Artery Disease	0.23213	0.03927	0.053658	MAGMA, 5kb, UKB
Development TFs	343	GERD	0.10809	0.059098	0.047784	MAGMA, 5kb, UKB
Development TFs	343	Diaphragmatic Hernia	0.011953	0.10765	0.047657	MAGMA, 5kb, UKB
Development TFs	343	Diverticular Disease	0.10067	0.064805	0.050717	MAGMA, 5kb, UKB
Development TFs	343	Glucose	0.0012861	0.18161	0.06023	MAGMA, 5kb, UKB
Development TFs	343	HDL-C	0.0025156	0.22494	0.08018	MAGMA, 5kb, UKB
Development TFs	343	Angina	0.52258	-0.0028988	0.051183	MAGMA, 5kb, UKB
Development TFs	343	LDL-C	0.1785	0.064757	0.070301	MAGMA, 5kb, UKB
Development TFs	343	Triglycerides	0.0082865	0.18801	0.078458	MAGMA, 5kb, UKB
Development TFs	343	Osteoarthritis	0.015678	0.10852	0.050413	MAGMA, 5kb, UKB
Development TFs	343	Raised Total Cholesterol	0.012421	0.13115	0.058442	MAGMA, 5kb, UKB
Development TFs	343	Type 2 Diabetes Mellitus	0.0079682	0.13741	0.057004	MAGMA, 5kb, UKB
Development TFs	343	Osteoporosis/BMD	1.9123e-08	0.41858	0.076087	MAGMA, 5kb, UKB
Development TFs	343	Deafness	0.71333	-0.027146	0.048203	MAGMA, 5kb, UKB
Development TFs	343	Diastolic BP	3.7071e-05	0.27188	0.068593	MAGMA, 5kb, UKB
Development TFs	343	Systolic BP	8.1108e-06	0.29954	0.069455	MAGMA, 5kb, UKB
Nondevelopment TFs	1170	Hypertension	0.0093844	0.088915	0.037831	MAGMA, 5kb, UKB
Nondevelopment TFs	1170	Primary Skin Malignancy	0.11064	0.035785	0.029256	MAGMA, 5kb, UKB
Nondevelopment TFs	1170	Cataracts	0.48445	0.0010509	0.026952	MAGMA, 5kb, UKB
Nondevelopment TFs	1170	Atrial Fibrillation	0.6867	-0.013507	0.027762	MAGMA, 5kb, UKB
Nondevelopment TFs	1170	Myocardial Infarction	0.17617	0.02584	0.027782	MAGMA, 5kb, UKB
Nondevelopment TFs	1170	Coronary Artery Disease	0.65654	-0.011853	0.029407	MAGMA, 5kb, UKB
Nondevelopment TFs	1170	GERD	0.81429	-0.023408	0.026188	MAGMA, 5kb, UKB
Nondevelopment TFs	1170	Diaphragmatic Hernia	0.75094	-0.017697	0.026122	MAGMA, 5kb, UKB
Nondevelopment TFs	1170	Diverticular Disease	0.2639	0.01755	0.027796	MAGMA, 5kb, UKB
Nondevelopment TFs	1170	Glucose	0.14574	0.035228	0.033395	MAGMA, 5kb, UKB
Nondevelopment TFs	1170	HDL-C	0.0024634	0.12425	0.044182	MAGMA, 5kb, UKB
Nondevelopment TFs	1170	Angina	0.035269	0.050729	0.028049	MAGMA, 5kb, UKB
Nondevelopment TFs	1170	LDL-C	0.046134	0.064871	0.03853	MAGMA, 5kb, UKB
Nondevelopment TFs	1170	Triglycerides	0.0021056	0.12307	0.042997	MAGMA, 5kb, UKB
Nondevelopment TFs	1170	Osteoarthritis	0.20943	0.02234	0.027633	MAGMA, 5kb, UKB
Nondevelopment TFs	1170	Raised Total Cholesterol	0.044847	0.054364	0.032033	MAGMA, 5kb, UKB
Nondevelopment TFs	1170	Type 2 Diabetes Mellitus	0.018591	0.064857	0.031122	MAGMA, 5kb, UKB
Nondevelopment TFs	1170	Osteoporosis/BMD	0.0062127	0.10273	0.041092	MAGMA, 5kb, UKB
Nondevelopment TFs	1170	Deafness	0.86696	-0.029462	0.026491	MAGMA, 5kb, UKB
Nondevelopment TFs	1170	Diastolic BP	0.00059773	0.12228	0.037736	MAGMA, 5kb, UKB
Nondevelopment TFs	1170	Systolic BP	0.00034697	0.12963	0.038209	MAGMA, 5kb, UKB
Intermediate-age TFs	459	Hypertension	5.5864e-05	0.22239	0.057545	MAGMA, 5kb, UKB
Intermediate-age TFs	459	Primary Skin Malignancy	0.047171	0.074474	0.044515	MAGMA, 5kb, UKB
Intermediate-age TFs	459	Cataracts	0.86064	-0.044423	0.04101	MAGMA, 5kb, UKB
Intermediate-age TFs	459	Atrial Fibrillation	0.028163	0.08062	0.042239	MAGMA, 5kb, UKB
Intermediate-age TFs	459	Myocardial Infarction	0.0011883	0.12844	0.042264	MAGMA, 5kb, UKB
Intermediate-age TFs	459	Coronary Artery Disease	0.20601	0.036709	0.044746	MAGMA, 5kb, UKB
Intermediate-age TFs	459	GERD	0.1487	0.041524	0.039849	MAGMA, 5kb, UKB
Intermediate-age TFs	459	Diaphragmatic Hernia	0.88282	-0.047268	0.039747	MAGMA, 5kb, UKB
Intermediate-age TFs	459	Diverticular Disease	0.099288	0.054377	0.042294	MAGMA, 5kb, UKB
Intermediate-age TFs	459	Glucose	0.0032281	0.13719	0.050362	MAGMA, 5kb, UKB
Intermediate-age TFs	459	HDL-C	0.00028252	0.23106	0.067002	MAGMA, 5kb, UKB
Intermediate-age TFs	459	Angina	0.5263	-0.0028163	0.042683	MAGMA, 5kb, UKB
Intermediate-age TFs	459	LDL-C	0.057304	0.092668	0.058728	MAGMA, 5kb, UKB
Intermediate-age TFs	459	Triglycerides	0.0046017	0.17071	0.065539	MAGMA, 5kb, UKB
Intermediate-age TFs	459	Osteoarthritis	0.23398	0.030518	0.042046	MAGMA, 5kb, UKB
Intermediate-age TFs	459	Raised Total Cholesterol	0.015159	0.10557	0.048737	MAGMA, 5kb, UKB
Intermediate-age TFs	459	Type 2 Diabetes Mellitus	0.032323	0.087524	0.047366	MAGMA, 5kb, UKB
Intermediate-age TFs	459	Osteoporosis/BMD	5.0473e-07	0.30676	0.062712	MAGMA, 5kb, UKB
Intermediate-age TFs	459	Deafness	0.81141	-0.035436	0.040126	MAGMA, 5kb, UKB
Intermediate-age TFs	459	Diastolic BP	3.9963e-06	0.25668	0.057463	MAGMA, 5kb, UKB
Intermediate-age TFs	459	Systolic BP	2.4821e-06	0.26575	0.058179	MAGMA, 5kb, UKB
Recently-evolved TFs	485	Hypertension	0.6175	-0.018747	0.062715	MAGMA, 5kb, UKB
Recently-evolved TFs	485	Primary Skin Malignancy	0.93125	-0.072012	0.048485	MAGMA, 5kb, UKB
Recently-evolved TFs	485	Cataracts	0.75174	-0.030374	0.044668	MAGMA, 5kb, UKB
Recently-evolved TFs	485	Atrial Fibrillation	0.80689	-0.039869	0.04601	MAGMA, 5kb, UKB
Recently-evolved TFs	485	Myocardial Infarction	0.62293	-0.014421	0.046046	MAGMA, 5kb, UKB
Recently-evolved TFs	485	Coronary Artery Disease	0.95703	-0.083692	0.048734	MAGMA, 5kb, UKB
Recently-evolved TFs	485	GERD	0.90556	-0.057028	0.043402	MAGMA, 5kb, UKB
Recently-evolved TFs	485	Diaphragmatic Hernia	0.61878	-0.013087	0.043293	MAGMA, 5kb, UKB
Recently-evolved TFs	485	Diverticular Disease	0.57224	-0.0083883	0.046068	MAGMA, 5kb, UKB
Recently-evolved TFs	485	Glucose	0.66488	-0.023509	0.055207	MAGMA, 5kb, UKB
Recently-evolved TFs	485	HDL-C	0.87495	-0.08445	0.073426	MAGMA, 5kb, UKB
Recently-evolved TFs	485	Angina	0.78139	-0.036123	0.046496	MAGMA, 5kb, UKB
Recently-evolved TFs	485	LDL-C	0.31966	0.030012	0.064036	MAGMA, 5kb, UKB
Recently-evolved TFs	485	Triglycerides	0.90908	-0.095478	0.07151	MAGMA, 5kb, UKB
Recently-evolved TFs	485	Osteoarthritis	0.42942	0.0081464	0.045804	MAGMA, 5kb, UKB
Recently-evolved TFs	485	Raised Total Cholesterol	0.46897	0.004134	0.0531	MAGMA, 5kb, UKB
Recently-evolved TFs	485	Type 2 Diabetes Mellitus	0.49733	0.00034696	0.051749	MAGMA, 5kb, UKB
Recently-evolved TFs	485	Osteoporosis/BMD	0.93048	-0.10185	0.068843	MAGMA, 5kb, UKB
Recently-evolved TFs	485	Deafness	0.6828	-0.020824	0.043789	MAGMA, 5kb, UKB
Recently-evolved TFs	485	Diastolic BP	0.7944	-0.051615	0.062809	MAGMA, 5kb, UKB
Recently-evolved TFs	485	Systolic BP	0.8916	-0.078557	0.063601	MAGMA, 5kb, UKB
Ancient TFs	560	Hypertension	2.0071e-05	0.21038	0.051215	MAGMA, 5kb, UKB
Ancient TFs	560	Primary Skin Malignancy	0.015265	0.085706	0.039618	MAGMA, 5kb, UKB
Ancient TFs	560	Cataracts	0.066408	0.054864	0.036499	MAGMA, 5kb, UKB
Ancient TFs	560	Atrial Fibrillation	0.074821	0.054172	0.037597	MAGMA, 5kb, UKB
Ancient TFs	560	Myocardial Infarction	0.39517	0.010004	0.037627	MAGMA, 5kb, UKB
Ancient TFs	560	Coronary Artery Disease	0.23716	0.028495	0.039826	MAGMA, 5kb, UKB
Ancient TFs	560	GERD	0.62543	-0.011342	0.035468	MAGMA, 5kb, UKB
Ancient TFs	560	Diaphragmatic Hernia	0.014721	0.077032	0.035373	MAGMA, 5kb, UKB
Ancient TFs	560	Diverticular Disease	0.22701	0.028187	0.037645	MAGMA, 5kb, UKB
Ancient TFs	560	Glucose	0.047779	0.075178	0.045101	MAGMA, 5kb, UKB
Ancient TFs	560	HDL-C	4.9858e-05	0.23258	0.059756	MAGMA, 5kb, UKB
Ancient TFs	560	Angina	0.0005061	0.12486	0.037977	MAGMA, 5kb, UKB
Ancient TFs	560	LDL-C	0.13639	0.057069	0.052036	MAGMA, 5kb, UKB
Ancient TFs	560	Triglycerides	3.941e-06	0.25949	0.058053	MAGMA, 5kb, UKB
Ancient TFs	560	Osteoarthritis	0.046375	0.062909	0.03742	MAGMA, 5kb, UKB
Ancient TFs	560	Raised Total Cholesterol	0.020028	0.089072	0.043379	MAGMA, 5kb, UKB
Ancient TFs	560	Type 2 Diabetes Mellitus	0.0011806	0.12815	0.042141	MAGMA, 5kb, UKB
Ancient TFs	560	Osteoporosis/BMD	5.1892e-06	0.24587	0.055747	MAGMA, 5kb, UKB
Ancient TFs	560	Deafness	0.76911	-0.026394	0.035864	MAGMA, 5kb, UKB
Ancient TFs	560	Diastolic BP	2.8571e-05	0.20493	0.05091	MAGMA, 5kb, UKB
Ancient TFs	560	Systolic BP	7.186e-07	0.24852	0.051542	MAGMA, 5kb, UKB
Recent non-KRAB TFs	611	Hypertension	0.0025668	0.1362	0.04866	MAGMA, 5kb, UKB
Recent non-KRAB TFs	611	Primary Skin Malignancy	0.091767	0.050049	0.037631	MAGMA, 5kb, UKB
Recent non-KRAB TFs	611	Cataracts	0.77439	-0.026118	0.034667	MAGMA, 5kb, UKB
Recent non-KRAB TFs	611	Atrial Fibrillation	0.34623	0.014124	0.03571	MAGMA, 5kb, UKB
Recent non-KRAB TFs	611	Myocardial Infarction	0.011875	0.080803	0.035732	MAGMA, 5kb, UKB
Recent non-KRAB TFs	611	Coronary Artery Disease	0.31323	0.018411	0.037826	MAGMA, 5kb, UKB
Recent non-KRAB TFs	611	GERD	0.3586	0.012201	0.033686	MAGMA, 5kb, UKB
Recent non-KRAB TFs	611	Diaphragmatic Hernia	0.90737	-0.044512	0.033599	MAGMA, 5kb, UKB
Recent non-KRAB TFs	611	Diverticular Disease	0.013711	0.078851	0.035749	MAGMA, 5kb, UKB
Recent non-KRAB TFs	611	Glucose	0.025017	0.083668	0.042692	MAGMA, 5kb, UKB
Recent non-KRAB TFs	611	HDL-C	0.0084563	0.1356	0.056764	MAGMA, 5kb, UKB
Recent non-KRAB TFs	611	Angina	0.43879	0.0055585	0.036085	MAGMA, 5kb, UKB
Recent non-KRAB TFs	611	LDL-C	0.18294	0.044929	0.049687	MAGMA, 5kb, UKB
Recent non-KRAB TFs	611	Triglycerides	0.06843	0.08249	0.05545	MAGMA, 5kb, UKB
Recent non-KRAB TFs	611	Osteoarthritis	0.23977	0.025134	0.035546	MAGMA, 5kb, UKB
Recent non-KRAB TFs	611	Raised Total Cholesterol	0.1038	0.051932	0.041207	MAGMA, 5kb, UKB
Recent non-KRAB TFs	611	Type 2 Diabetes Mellitus	0.075579	0.057593	0.04012	MAGMA, 5kb, UKB
Recent non-KRAB TFs	611	Osteoporosis/BMD	0.00020743	0.18843	0.053361	MAGMA, 5kb, UKB
Recent non-KRAB TFs	611	Deafness	0.74299	-0.022203	0.034022	MAGMA, 5kb, UKB
Recent non-KRAB TFs	611	Diastolic BP	8.7535e-05	0.18276	0.048693	MAGMA, 5kb, UKB
Recent non-KRAB TFs	611	Systolic BP	8.4154e-05	0.18554	0.049303	MAGMA, 5kb, UKB
Ancient non-KRAB TFs	578	Hypertension	9.5338e-06	0.21475	0.050213	MAGMA, 5kb, UKB
Ancient non-KRAB TFs	578	Primary Skin Malignancy	0.01725	0.082133	0.038845	MAGMA, 5kb, UKB
Ancient non-KRAB TFs	578	Cataracts	0.085938	0.048895	0.035788	MAGMA, 5kb, UKB
Ancient non-KRAB TFs	578	Atrial Fibrillation	0.027199	0.070914	0.036862	MAGMA, 5kb, UKB
Ancient non-KRAB TFs	578	Myocardial Infarction	0.237	0.026415	0.036893	MAGMA, 5kb, UKB
Ancient non-KRAB TFs	578	Coronary Artery Disease	0.18527	0.034968	0.039049	MAGMA, 5kb, UKB
Ancient non-KRAB TFs	578	GERD	0.6788	-0.016149	0.034776	MAGMA, 5kb, UKB
Ancient non-KRAB TFs	578	Diaphragmatic Hernia	0.023048	0.069183	0.034684	MAGMA, 5kb, UKB
Ancient non-KRAB TFs	578	Diverticular Disease	0.17824	0.034037	0.03691	MAGMA, 5kb, UKB
Ancient non-KRAB TFs	578	Glucose	0.034602	0.080357	0.04422	MAGMA, 5kb, UKB
Ancient non-KRAB TFs	578	HDL-C	7.9732e-06	0.25291	0.058592	MAGMA, 5kb, UKB
Ancient non-KRAB TFs	578	Angina	0.00027109	0.12882	0.037235	MAGMA, 5kb, UKB
Ancient non-KRAB TFs	578	LDL-C	0.083794	0.070421	0.051028	MAGMA, 5kb, UKB
Ancient non-KRAB TFs	578	Triglycerides	6.8937e-07	0.27492	0.056922	MAGMA, 5kb, UKB
Ancient non-KRAB TFs	578	Osteoarthritis	0.015092	0.079534	0.036688	MAGMA, 5kb, UKB
Ancient non-KRAB TFs	578	Raised Total Cholesterol	0.0087347	0.10109	0.042531	MAGMA, 5kb, UKB
Ancient non-KRAB TFs	578	Type 2 Diabetes Mellitus	0.0009559	0.12826	0.041319	MAGMA, 5kb, UKB
Ancient non-KRAB TFs	578	Osteoporosis/BMD	6.3651e-06	0.23871	0.054673	MAGMA, 5kb, UKB
Ancient non-KRAB TFs	578	Deafness	0.76775	-0.025721	0.035163	MAGMA, 5kb, UKB
Ancient non-KRAB TFs	578	Diastolic BP	3.4873e-06	0.22448	0.049929	MAGMA, 5kb, UKB
Ancient non-KRAB TFs	578	Systolic BP	3.9943e-08	0.27143	0.050547	MAGMA, 5kb, UKB
Nondisease Non-ZF TFs	564	Hypertension	5.8541e-06	0.22597	0.051541	MAGMA, 5kb, UKB
Nondisease Non-ZF TFs	564	Primary Skin Malignancy	0.1543	0.040598	0.039873	MAGMA, 5kb, UKB
Nondisease Non-ZF TFs	564	Cataracts	0.6134	-0.010586	0.036733	MAGMA, 5kb, UKB
Nondisease Non-ZF TFs	564	Atrial Fibrillation	0.65889	-0.015492	0.037837	MAGMA, 5kb, UKB
Nondisease Non-ZF TFs	564	Myocardial Infarction	0.18149	0.034447	0.037865	MAGMA, 5kb, UKB
Nondisease Non-ZF TFs	564	Coronary Artery Disease	0.40572	0.0095618	0.040079	MAGMA, 5kb, UKB
Nondisease Non-ZF TFs	564	GERD	0.35577	0.013199	0.035693	MAGMA, 5kb, UKB
Nondisease Non-ZF TFs	564	Diaphragmatic Hernia	0.079514	0.050139	0.0356	MAGMA, 5kb, UKB
Nondisease Non-ZF TFs	564	Diverticular Disease	0.19651	0.032359	0.037883	MAGMA, 5kb, UKB
Nondisease Non-ZF TFs	564	Glucose	0.01459	0.09887	0.045328	MAGMA, 5kb, UKB
Nondisease Non-ZF TFs	564	HDL-C	1.1001e-05	0.25558	0.060209	MAGMA, 5kb, UKB
Nondisease Non-ZF TFs	564	Angina	0.030411	0.071679	0.03823	MAGMA, 5kb, UKB
Nondisease Non-ZF TFs	564	LDL-C	0.54529	-0.0059638	0.052421	MAGMA, 5kb, UKB
Nondisease Non-ZF TFs	564	Triglycerides	2.0887e-05	0.2397	0.058484	MAGMA, 5kb, UKB
Nondisease Non-ZF TFs	564	Osteoarthritis	0.050119	0.061907	0.037661	MAGMA, 5kb, UKB
Nondisease Non-ZF TFs	564	Raised Total Cholesterol	0.048359	0.072523	0.04366	MAGMA, 5kb, UKB
Nondisease Non-ZF TFs	564	Type 2 Diabetes Mellitus	0.0029485	0.11705	0.042506	MAGMA, 5kb, UKB
Nondisease Non-ZF TFs	564	Osteoporosis/BMD	6.6076e-05	0.21573	0.056424	MAGMA, 5kb, UKB
Nondisease Non-ZF TFs	564	Deafness	0.68751	-0.017581	0.035965	MAGMA, 5kb, UKB
Nondisease Non-ZF TFs	564	Diastolic BP	7.1428e-07	0.24705	0.051227	MAGMA, 5kb, UKB
Nondisease Non-ZF TFs	564	Systolic BP	4.2302e-06	0.2311	0.05188	MAGMA, 5kb, UKB
Nondisease TFs	1216	Hypertension	0.00042793	0.12491	0.037458	MAGMA, 5kb, UKB
Nondisease TFs	1216	Primary Skin Malignancy	0.15084	0.029924	0.028972	MAGMA, 5kb, UKB
Nondisease TFs	1216	Cataracts	0.52522	-0.0016886	0.02669	MAGMA, 5kb, UKB
Nondisease TFs	1216	Atrial Fibrillation	0.66297	-0.011563	0.027493	MAGMA, 5kb, UKB
Nondisease TFs	1216	Myocardial Infarction	0.26014	0.017689	0.027513	MAGMA, 5kb, UKB
Nondisease TFs	1216	Coronary Artery Disease	0.6414	-0.010548	0.029122	MAGMA, 5kb, UKB
Nondisease TFs	1216	GERD	0.72354	-0.015389	0.025935	MAGMA, 5kb, UKB
Nondisease TFs	1216	Diaphragmatic Hernia	0.30254	0.013378	0.025869	MAGMA, 5kb, UKB
Nondisease TFs	1216	Diverticular Disease	0.30012	0.014426	0.027527	MAGMA, 5kb, UKB
Nondisease TFs	1216	Glucose	0.043385	0.056553	0.033018	MAGMA, 5kb, UKB
Nondisease TFs	1216	HDL-C	0.0011221	0.13403	0.043852	MAGMA, 5kb, UKB
Nondisease TFs	1216	Angina	0.073001	0.040386	0.027778	MAGMA, 5kb, UKB
Nondisease TFs	1216	LDL-C	0.21676	0.02989	0.038163	MAGMA, 5kb, UKB
Nondisease TFs	1216	Triglycerides	0.0025099	0.1195	0.042584	MAGMA, 5kb, UKB
Nondisease TFs	1216	Osteoarthritis	0.042073	0.047263	0.027363	MAGMA, 5kb, UKB
Nondisease TFs	1216	Raised Total Cholesterol	0.044729	0.053876	0.031722	MAGMA, 5kb, UKB
Nondisease TFs	1216	Type 2 Diabetes Mellitus	0.0090431	0.072942	0.030854	MAGMA, 5kb, UKB
Nondisease TFs	1216	Osteoporosis/BMD	0.0011381	0.12504	0.040968	MAGMA, 5kb, UKB
Nondisease TFs	1216	Deafness	0.77539	-0.01982	0.026191	MAGMA, 5kb, UKB
Nondisease TFs	1216	Diastolic BP	0.00041266	0.12511	0.037406	MAGMA, 5kb, UKB
Nondisease TFs	1216	Systolic BP	0.0001273	0.13856	0.037874	MAGMA, 5kb, UKB
Non-zinc finger TFs	796	Hypertension	8.7312e-08	0.23124	0.044242	MAGMA, 5kb, UKB
Non-zinc finger TFs	796	Primary Skin Malignancy	0.056267	0.05433	0.034235	MAGMA, 5kb, UKB
Non-zinc finger TFs	796	Cataracts	0.52856	-0.0022596	0.03154	MAGMA, 5kb, UKB
Non-zinc finger TFs	796	Atrial Fibrillation	0.049724	0.053524	0.032485	MAGMA, 5kb, UKB
Non-zinc finger TFs	796	Myocardial Infarction	0.033655	0.059483	0.032509	MAGMA, 5kb, UKB
Non-zinc finger TFs	796	Coronary Artery Disease	0.30665	0.017392	0.034413	MAGMA, 5kb, UKB
Non-zinc finger TFs	796	GERD	0.2383	0.021814	0.030646	MAGMA, 5kb, UKB
Non-zinc finger TFs	796	Diaphragmatic Hernia	0.087569	0.041447	0.030567	MAGMA, 5kb, UKB
Non-zinc finger TFs	796	Diverticular Disease	0.04081	0.056642	0.032525	MAGMA, 5kb, UKB
Non-zinc finger TFs	796	Glucose	0.0021327	0.11167	0.039071	MAGMA, 5kb, UKB
Non-zinc finger TFs	796	HDL-C	9.725e-07	0.24623	0.05172	MAGMA, 5kb, UKB
Non-zinc finger TFs	796	Angina	0.027858	0.062806	0.032824	MAGMA, 5kb, UKB
Non-zinc finger TFs	796	LDL-C	0.059915	0.070048	0.045031	MAGMA, 5kb, UKB
Non-zinc finger TFs	796	Triglycerides	5.275e-06	0.2214	0.050238	MAGMA, 5kb, UKB
Non-zinc finger TFs	796	Osteoarthritis	0.12964	0.036481	0.032337	MAGMA, 5kb, UKB
Non-zinc finger TFs	796	Raised Total Cholesterol	0.010038	0.087155	0.037484	MAGMA, 5kb, UKB
Non-zinc finger TFs	796	Type 2 Diabetes Mellitus	0.00023026	0.12777	0.036469	MAGMA, 5kb, UKB
Non-zinc finger TFs	796	Osteoporosis/BMD	1.0386e-07	0.25122	0.048362	MAGMA, 5kb, UKB
Non-zinc finger TFs	796	Deafness	0.76473	-0.022402	0.031044	MAGMA, 5kb, UKB
Non-zinc finger TFs	796	Diastolic BP	1.7212e-09	0.26076	0.044105	MAGMA, 5kb, UKB
Non-zinc finger TFs	796	Systolic BP	6.2096e-08	0.2363	0.044672	MAGMA, 5kb, UKB
Tissue specific TFs	604	Hypertension	3.0283e-08	0.27823	0.051337	MAGMA, 5kb, UKB
Tissue specific TFs	604	Primary Skin Malignancy	0.31973	0.018613	0.039733	MAGMA, 5kb, UKB
Tissue specific TFs	604	Cataracts	0.61777	-0.010967	0.036602	MAGMA, 5kb, UKB
Tissue specific TFs	604	Atrial Fibrillation	0.065323	0.056989	0.0377	MAGMA, 5kb, UKB
Tissue specific TFs	604	Myocardial Infarction	0.10147	0.048041	0.037729	MAGMA, 5kb, UKB
Tissue specific TFs	604	Coronary Artery Disease	0.35748	0.014585	0.039937	MAGMA, 5kb, UKB
Tissue specific TFs	604	GERD	0.09843	0.0459	0.035564	MAGMA, 5kb, UKB
Tissue specific TFs	604	Diaphragmatic Hernia	0.22401	0.026916	0.035475	MAGMA, 5kb, UKB
Tissue specific TFs	604	Diverticular Disease	0.3529	0.01425	0.03775	MAGMA, 5kb, UKB
Tissue specific TFs	604	Glucose	0.055872	0.072367	0.045499	MAGMA, 5kb, UKB
Tissue specific TFs	604	HDL-C	0.068091	0.090045	0.060424	MAGMA, 5kb, UKB
Tissue specific TFs	604	Angina	0.37542	0.012097	0.038095	MAGMA, 5kb, UKB
Tissue specific TFs	604	LDL-C	0.17825	0.048322	0.052407	MAGMA, 5kb, UKB
Tissue specific TFs	604	Triglycerides	0.080968	0.081821	0.0585	MAGMA, 5kb, UKB
Tissue specific TFs	604	Osteoarthritis	0.012788	0.083777	0.037521	MAGMA, 5kb, UKB
Tissue specific TFs	604	Raised Total Cholesterol	0.0015627	0.12855	0.043493	MAGMA, 5kb, UKB
Tissue specific TFs	604	Type 2 Diabetes Mellitus	0.011916	0.095723	0.042355	MAGMA, 5kb, UKB
Tissue specific TFs	604	Osteoporosis/BMD	2.9319e-05	0.22692	0.056458	MAGMA, 5kb, UKB
Tissue specific TFs	604	Deafness	0.48762	0.0011138	0.035882	MAGMA, 5kb, UKB
Tissue specific TFs	604	Diastolic BP	0.00022794	0.18031	0.051428	MAGMA, 5kb, UKB
Tissue specific TFs	604	Systolic BP	9.093e-06	0.22324	0.052069	MAGMA, 5kb, UKB
KRAB zinc finger TFs	319	Hypertension	0.50676	-0.001388	0.081846	MAGMA, 5kb, UKB
KRAB zinc finger TFs	319	Primary Skin Malignancy	0.96233	-0.11255	0.063283	MAGMA, 5kb, UKB
KRAB zinc finger TFs	319	Cataracts	0.82751	-0.05506	0.058302	MAGMA, 5kb, UKB
KRAB zinc finger TFs	319	Atrial Fibrillation	0.46496	0.0052825	0.060056	MAGMA, 5kb, UKB
KRAB zinc finger TFs	319	Myocardial Infarction	0.73618	-0.037961	0.060101	MAGMA, 5kb, UKB
KRAB zinc finger TFs	319	Coronary Artery Disease	0.98957	-0.14696	0.063605	MAGMA, 5kb, UKB
KRAB zinc finger TFs	319	GERD	0.73334	-0.035292	0.056652	MAGMA, 5kb, UKB
KRAB zinc finger TFs	319	Diaphragmatic Hernia	0.3825	0.016892	0.056508	MAGMA, 5kb, UKB
KRAB zinc finger TFs	319	Diverticular Disease	0.99452	-0.15295	0.060119	MAGMA, 5kb, UKB
KRAB zinc finger TFs	319	Glucose	0.61561	-0.021236	0.072237	MAGMA, 5kb, UKB
KRAB zinc finger TFs	319	HDL-C	0.93058	-0.14223	0.096088	MAGMA, 5kb, UKB
KRAB zinc finger TFs	319	Angina	0.97179	-0.11576	0.060673	MAGMA, 5kb, UKB
KRAB zinc finger TFs	319	LDL-C	0.18661	0.07436	0.083506	MAGMA, 5kb, UKB
KRAB zinc finger TFs	319	Triglycerides	0.89956	-0.11916	0.093157	MAGMA, 5kb, UKB
KRAB zinc finger TFs	319	Osteoarthritis	0.76002	-0.042224	0.059774	MAGMA, 5kb, UKB
KRAB zinc finger TFs	319	Raised Total Cholesterol	0.29093	0.03816	0.069296	MAGMA, 5kb, UKB
KRAB zinc finger TFs	319	Type 2 Diabetes Mellitus	0.50115	-0.00019363	0.067311	MAGMA, 5kb, UKB
KRAB zinc finger TFs	319	Osteoporosis/BMD	0.8396	-0.088455	0.089094	MAGMA, 5kb, UKB
KRAB zinc finger TFs	319	Deafness	0.76541	-0.041281	0.057032	MAGMA, 5kb, UKB
KRAB zinc finger TFs	319	Diastolic BP	0.97269	-0.15859	0.082511	MAGMA, 5kb, UKB
KRAB zinc finger TFs	319	Systolic BP	0.99299	-0.20527	0.083548	MAGMA, 5kb, UKB
Non-KRAB zinc finger TFs	398	Hypertension	0.075534	0.084803	0.059062	MAGMA, 5kb, UKB
Non-KRAB zinc finger TFs	398	Primary Skin Malignancy	0.020203	0.093605	0.045667	MAGMA, 5kb, UKB
Non-KRAB zinc finger TFs	398	Cataracts	0.18809	0.037235	0.042074	MAGMA, 5kb, UKB
Non-KRAB zinc finger TFs	398	Atrial Fibrillation	0.31252	0.021181	0.043339	MAGMA, 5kb, UKB
Non-KRAB zinc finger TFs	398	Myocardial Infarction	0.15451	0.044122	0.043371	MAGMA, 5kb, UKB
Non-KRAB zinc finger TFs	398	Coronary Artery Disease	0.16111	0.045444	0.045906	MAGMA, 5kb, UKB
Non-KRAB zinc finger TFs	398	GERD	0.79876	-0.034228	0.040882	MAGMA, 5kb, UKB
Non-KRAB zinc finger TFs	398	Diaphragmatic Hernia	0.87488	-0.046887	0.040778	MAGMA, 5kb, UKB
Non-KRAB zinc finger TFs	398	Diverticular Disease	0.055753	0.069057	0.04339	MAGMA, 5kb, UKB
Non-KRAB zinc finger TFs	398	Glucose	0.25818	0.033504	0.051624	MAGMA, 5kb, UKB
Non-KRAB zinc finger TFs	398	HDL-C	0.064763	0.10412	0.068677	MAGMA, 5kb, UKB
Non-KRAB zinc finger TFs	398	Angina	0.054894	0.070026	0.043787	MAGMA, 5kb, UKB
Non-KRAB zinc finger TFs	398	LDL-C	0.24236	0.042129	0.060292	MAGMA, 5kb, UKB
Non-KRAB zinc finger TFs	398	Triglycerides	0.059389	0.10497	0.067288	MAGMA, 5kb, UKB
Non-KRAB zinc finger TFs	398	Osteoarthritis	0.017491	0.090954	0.043132	MAGMA, 5kb, UKB
Non-KRAB zinc finger TFs	398	Raised Total Cholesterol	0.14227	0.053519	0.050008	MAGMA, 5kb, UKB
Non-KRAB zinc finger TFs	398	Type 2 Diabetes Mellitus	0.25957	0.031333	0.048602	MAGMA, 5kb, UKB
Non-KRAB zinc finger TFs	398	Osteoporosis/BMD	0.0086264	0.15365	0.064519	MAGMA, 5kb, UKB
Non-KRAB zinc finger TFs	398	Deafness	0.76831	-0.030333	0.041364	MAGMA, 5kb, UKB
Non-KRAB zinc finger TFs	398	Diastolic BP	0.025442	0.11525	0.059023	MAGMA, 5kb, UKB
Non-KRAB zinc finger TFs	398	Systolic BP	0.00010665	0.22126	0.059742	MAGMA, 5kb, UKB
Zinc finger TFs	717	Hypertension	0.11138	0.06168	0.050587	MAGMA, 5kb, UKB
Zinc finger TFs	717	Primary Skin Malignancy	0.25584	0.025671	0.039119	MAGMA, 5kb, UKB
Zinc finger TFs	717	Cataracts	0.43083	0.0062802	0.036037	MAGMA, 5kb, UKB
Zinc finger TFs	717	Atrial Fibrillation	0.31812	0.017556	0.03712	MAGMA, 5kb, UKB
Zinc finger TFs	717	Myocardial Infarction	0.31529	0.017865	0.037148	MAGMA, 5kb, UKB
Zinc finger TFs	717	Coronary Artery Disease	0.71907	-0.022809	0.03932	MAGMA, 5kb, UKB
Zinc finger TFs	717	GERD	0.8648	-0.038593	0.035016	MAGMA, 5kb, UKB
Zinc finger TFs	717	Diaphragmatic Hernia	0.78815	-0.027943	0.034927	MAGMA, 5kb, UKB
Zinc finger TFs	717	Diverticular Disease	0.58283	-0.0077728	0.037166	MAGMA, 5kb, UKB
Zinc finger TFs	717	Glucose	0.35332	0.016663	0.044272	MAGMA, 5kb, UKB
Zinc finger TFs	717	HDL-C	0.34721	0.023141	0.058901	MAGMA, 5kb, UKB
Zinc finger TFs	717	Angina	0.42446	0.0071453	0.037506	MAGMA, 5kb, UKB
Zinc finger TFs	717	LDL-C	0.12529	0.059323	0.051631	MAGMA, 5kb, UKB
Zinc finger TFs	717	Triglycerides	0.29301	0.031383	0.057622	MAGMA, 5kb, UKB
Zinc finger TFs	717	Osteoarthritis	0.085455	0.050591	0.036945	MAGMA, 5kb, UKB
Zinc finger TFs	717	Raised Total Cholesterol	0.10438	0.05384	0.042831	MAGMA, 5kb, UKB
Zinc finger TFs	717	Type 2 Diabetes Mellitus	0.29107	0.022902	0.041619	MAGMA, 5kb, UKB
Zinc finger TFs	717	Osteoporosis/BMD	0.078298	0.077912	0.054996	MAGMA, 5kb, UKB
Zinc finger TFs	717	Deafness	0.85845	-0.037876	0.035285	MAGMA, 5kb, UKB
Zinc finger TFs	717	Diastolic BP	0.3106	0.024957	0.050502	MAGMA, 5kb, UKB
Zinc finger TFs	717	Systolic BP	0.048033	0.085098	0.051131	MAGMA, 5kb, UKB
Lowest LOEUF Quantile	1026	Hypertension	2.2318e-10	0.23101	0.037017	MAGMA, 5kb, UKB
Lowest LOEUF Quantile	1026	Primary Skin Malignancy	0.15129	0.029543	0.028656	MAGMA, 5kb, UKB
Lowest LOEUF Quantile	1026	Cataracts	0.046296	0.044399	0.026397	MAGMA, 5kb, UKB
Lowest LOEUF Quantile	1026	Atrial Fibrillation	0.56486	-0.0044408	0.027193	MAGMA, 5kb, UKB
Lowest LOEUF Quantile	1026	Myocardial Infarction	0.0079501	0.065611	0.027208	MAGMA, 5kb, UKB
Lowest LOEUF Quantile	1026	Coronary Artery Disease	0.025346	0.056283	0.028801	MAGMA, 5kb, UKB
Lowest LOEUF Quantile	1026	GERD	0.1864	0.022861	0.025651	MAGMA, 5kb, UKB
Lowest LOEUF Quantile	1026	Diaphragmatic Hernia	0.8415	-0.025603	0.025586	MAGMA, 5kb, UKB
Lowest LOEUF Quantile	1026	Diverticular Disease	0.015354	0.058829	0.027223	MAGMA, 5kb, UKB
Lowest LOEUF Quantile	1026	Glucose	0.015209	0.070624	0.032624	MAGMA, 5kb, UKB
Lowest LOEUF Quantile	1026	HDL-C	5.4712e-07	0.21134	0.043346	MAGMA, 5kb, UKB
Lowest LOEUF Quantile	1026	Angina	0.038282	0.048659	0.027474	MAGMA, 5kb, UKB
Lowest LOEUF Quantile	1026	LDL-C	0.021152	0.076934	0.037886	MAGMA, 5kb, UKB
Lowest LOEUF Quantile	1026	Triglycerides	1.1156e-05	0.17928	0.042267	MAGMA, 5kb, UKB
Lowest LOEUF Quantile	1026	Osteoarthritis	0.0052042	0.069339	0.027062	MAGMA, 5kb, UKB
Lowest LOEUF Quantile	1026	Raised Total Cholesterol	0.0015897	0.092552	0.03137	MAGMA, 5kb, UKB
Lowest LOEUF Quantile	1026	Type 2 Diabetes Mellitus	0.024582	0.059986	0.030491	MAGMA, 5kb, UKB
Lowest LOEUF Quantile	1026	Osteoporosis/BMD	2.3766e-08	0.22109	0.040472	MAGMA, 5kb, UKB
Lowest LOEUF Quantile	1026	Deafness	0.0079577	0.062495	0.02592	MAGMA, 5kb, UKB
Lowest LOEUF Quantile	1026	Diastolic BP	2.8759e-12	0.25583	0.037126	MAGMA, 5kb, UKB
Lowest LOEUF Quantile	1026	Systolic BP	1.7461e-10	0.23609	0.0376	MAGMA, 5kb, UKB
Highest LOEUF Quantile	968	Hypertension	0.56382	-0.0061976	0.038574	MAGMA, 5kb, UKB
Highest LOEUF Quantile	968	Primary Skin Malignancy	0.30176	0.015493	0.029832	MAGMA, 5kb, UKB
Highest LOEUF Quantile	968	Cataracts	0.8322	-0.026462	0.027481	MAGMA, 5kb, UKB
Highest LOEUF Quantile	968	Atrial Fibrillation	0.50005	-3.2992e-06	0.028308	MAGMA, 5kb, UKB
Highest LOEUF Quantile	968	Myocardial Infarction	0.94021	-0.044093	0.028327	MAGMA, 5kb, UKB
Highest LOEUF Quantile	968	Coronary Artery Disease	0.93968	-0.046538	0.029983	MAGMA, 5kb, UKB
Highest LOEUF Quantile	968	GERD	0.63145	-0.0089647	0.026703	MAGMA, 5kb, UKB
Highest LOEUF Quantile	968	Diaphragmatic Hernia	0.017056	0.056431	0.026632	MAGMA, 5kb, UKB
Highest LOEUF Quantile	968	Diverticular Disease	0.95473	-0.047969	0.02834	MAGMA, 5kb, UKB
Highest LOEUF Quantile	968	Glucose	0.99617	-0.090665	0.033994	MAGMA, 5kb, UKB
Highest LOEUF Quantile	968	HDL-C	0.98128	-0.094199	0.045265	MAGMA, 5kb, UKB
Highest LOEUF Quantile	968	Angina	0.96767	-0.052838	0.028596	MAGMA, 5kb, UKB
Highest LOEUF Quantile	968	LDL-C	0.93217	-0.058617	0.039282	MAGMA, 5kb, UKB
Highest LOEUF Quantile	968	Triglycerides	0.81943	-0.040038	0.043842	MAGMA, 5kb, UKB
Highest LOEUF Quantile	968	Osteoarthritis	0.39864	0.0072363	0.028172	MAGMA, 5kb, UKB
Highest LOEUF Quantile	968	Raised Total Cholesterol	0.67062	-0.014424	0.032659	MAGMA, 5kb, UKB
Highest LOEUF Quantile	968	Type 2 Diabetes Mellitus	0.92882	-0.046542	0.031723	MAGMA, 5kb, UKB
Highest LOEUF Quantile	968	Osteoporosis/BMD	0.97147	-0.080168	0.042128	MAGMA, 5kb, UKB
Highest LOEUF Quantile	968	Deafness	0.78543	-0.021363	0.027019	MAGMA, 5kb, UKB
Highest LOEUF Quantile	968	Diastolic BP	0.89131	-0.047683	0.038654	MAGMA, 5kb, UKB
Highest LOEUF Quantile	968	Systolic BP	0.81222	-0.034684	0.039141	MAGMA, 5kb, UKB
Lysosome	272	Hypertension	0.8194	-0.06399	0.07008	MAGMA, 5kb, UKB
Lysosome	272	Primary Skin Malignancy	0.22083	0.041693	0.054189	MAGMA, 5kb, UKB
Lysosome	272	Cataracts	0.50512	-0.00064128	0.049921	MAGMA, 5kb, UKB
Lysosome	272	Atrial Fibrillation	0.76984	-0.037966	0.051421	MAGMA, 5kb, UKB
Lysosome	272	Myocardial Infarction	0.42838	0.0092881	0.05146	MAGMA, 5kb, UKB
Lysosome	272	Coronary Artery Disease	0.60019	-0.013827	0.054468	MAGMA, 5kb, UKB
Lysosome	272	GERD	0.15594	0.049054	0.048506	MAGMA, 5kb, UKB
Lysosome	272	Diaphragmatic Hernia	0.66774	-0.020983	0.048384	MAGMA, 5kb, UKB
Lysosome	272	Diverticular Disease	0.64042	-0.018513	0.051485	MAGMA, 5kb, UKB
Lysosome	272	Glucose	0.93716	-0.094358	0.061615	MAGMA, 5kb, UKB
Lysosome	272	HDL-C	0.38504	0.023975	0.082029	MAGMA, 5kb, UKB
Lysosome	272	Angina	0.20989	0.041921	0.051957	MAGMA, 5kb, UKB
Lysosome	272	LDL-C	0.30744	0.03582	0.071194	MAGMA, 5kb, UKB
Lysosome	272	Triglycerides	0.58377	-0.016841	0.079604	MAGMA, 5kb, UKB
Lysosome	272	Osteoarthritis	0.11256	0.062086	0.051181	MAGMA, 5kb, UKB
Lysosome	272	Raised Total Cholesterol	0.090614	0.079331	0.059333	MAGMA, 5kb, UKB
Lysosome	272	Type 2 Diabetes Mellitus	0.33691	0.024261	0.05764	MAGMA, 5kb, UKB
Lysosome	272	Osteoporosis/BMD	0.062648	0.11794	0.076932	MAGMA, 5kb, UKB
Lysosome	272	Deafness	0.48626	0.0016765	0.048679	MAGMA, 5kb, UKB
Lysosome	272	Diastolic BP	0.85275	-0.073401	0.070017	MAGMA, 5kb, UKB
Lysosome	272	Systolic BP	0.9952	-0.18361	0.07089	MAGMA, 5kb, UKB
Mitochondrial Biogenesis	4	Hypertension	0.99998	-2.6296	0.63081	MAGMA, 5kb, UKB
Mitochondrial Biogenesis	4	Primary Skin Malignancy	0.6108	-0.13734	0.48804	MAGMA, 5kb, UKB
Mitochondrial Biogenesis	4	Cataracts	0.95412	-0.7581	0.44956	MAGMA, 5kb, UKB
Mitochondrial Biogenesis	4	Atrial Fibrillation	0.74511	-0.30528	0.46311	MAGMA, 5kb, UKB
Mitochondrial Biogenesis	4	Myocardial Infarction	0.84247	-0.46561	0.46345	MAGMA, 5kb, UKB
Mitochondrial Biogenesis	4	Coronary Artery Disease	0.63222	-0.16568	0.49055	MAGMA, 5kb, UKB
Mitochondrial Biogenesis	4	GERD	0.71594	-0.24937	0.43686	MAGMA, 5kb, UKB
Mitochondrial Biogenesis	4	Diaphragmatic Hernia	0.052547	0.70619	0.43572	MAGMA, 5kb, UKB
Mitochondrial Biogenesis	4	Diverticular Disease	0.093189	0.6127	0.46366	MAGMA, 5kb, UKB
Mitochondrial Biogenesis	4	Glucose	0.70002	-0.29101	0.55486	MAGMA, 5kb, UKB
Mitochondrial Biogenesis	4	HDL-C	0.79671	-0.61302	0.73862	MAGMA, 5kb, UKB
Mitochondrial Biogenesis	4	Angina	0.69156	-0.2341	0.46792	MAGMA, 5kb, UKB
Mitochondrial Biogenesis	4	LDL-C	0.79568	-0.53114	0.64279	MAGMA, 5kb, UKB
Mitochondrial Biogenesis	4	Triglycerides	0.96105	-1.2649	0.71741	MAGMA, 5kb, UKB
Mitochondrial Biogenesis	4	Osteoarthritis	0.020069	0.94597	0.46089	MAGMA, 5kb, UKB
Mitochondrial Biogenesis	4	Raised Total Cholesterol	0.99735	-1.4898	0.53425	MAGMA, 5kb, UKB
Mitochondrial Biogenesis	4	Type 2 Diabetes Mellitus	0.98506	-1.1274	0.5191	MAGMA, 5kb, UKB
Mitochondrial Biogenesis	4	Osteoporosis/BMD	0.67271	-0.30707	0.68633	MAGMA, 5kb, UKB
Mitochondrial Biogenesis	4	Deafness	0.52238	-0.02467	0.43948	MAGMA, 5kb, UKB
Mitochondrial Biogenesis	4	Diastolic BP	0.80607	-0.54731	0.63381	MAGMA, 5kb, UKB
Mitochondrial Biogenesis	4	Systolic BP	0.9432	-1.0155	0.64179	MAGMA, 5kb, UKB
MitoCarta Genes	1105	Hypertension	0.15887	0.034407	0.034436	MAGMA, 5kb, UKB
MitoCarta Genes	1105	Primary Skin Malignancy	0.80092	-0.022503	0.026633	MAGMA, 5kb, UKB
MitoCarta Genes	1105	Cataracts	0.64072	-0.0088425	0.024535	MAGMA, 5kb, UKB
MitoCarta Genes	1105	Atrial Fibrillation	0.16967	0.024147	0.025272	MAGMA, 5kb, UKB
MitoCarta Genes	1105	Myocardial Infarction	0.20565	0.02078	0.025291	MAGMA, 5kb, UKB
MitoCarta Genes	1105	Coronary Artery Disease	0.28346	0.015329	0.02677	MAGMA, 5kb, UKB
MitoCarta Genes	1105	GERD	0.26969	0.014632	0.02384	MAGMA, 5kb, UKB
MitoCarta Genes	1105	Diaphragmatic Hernia	0.15574	0.024068	0.023779	MAGMA, 5kb, UKB
MitoCarta Genes	1105	Diverticular Disease	0.1612	0.025039	0.025304	MAGMA, 5kb, UKB
MitoCarta Genes	1105	Glucose	0.46558	0.0026172	0.030299	MAGMA, 5kb, UKB
MitoCarta Genes	1105	HDL-C	0.58227	-0.00838	0.040346	MAGMA, 5kb, UKB
MitoCarta Genes	1105	Angina	0.9591	-0.044432	0.025529	MAGMA, 5kb, UKB
MitoCarta Genes	1105	LDL-C	0.66883	-0.015308	0.035055	MAGMA, 5kb, UKB
MitoCarta Genes	1105	Triglycerides	0.92764	-0.05706	0.039122	MAGMA, 5kb, UKB
MitoCarta Genes	1105	Osteoarthritis	0.12987	0.028345	0.02515	MAGMA, 5kb, UKB
MitoCarta Genes	1105	Raised Total Cholesterol	0.98468	-0.063026	0.029153	MAGMA, 5kb, UKB
MitoCarta Genes	1105	Type 2 Diabetes Mellitus	0.86112	-0.03078	0.028358	MAGMA, 5kb, UKB
MitoCarta Genes	1105	Osteoporosis/BMD	0.61719	-0.011159	0.037432	MAGMA, 5kb, UKB
MitoCarta Genes	1105	Deafness	0.32813	0.010764	0.024183	MAGMA, 5kb, UKB
MitoCarta Genes	1105	Diastolic BP	0.78723	-0.027587	0.034619	MAGMA, 5kb, UKB
MitoCarta Genes	1105	Systolic BP	0.12633	0.0401	0.035053	MAGMA, 5kb, UKB
Mitochondrion	1147	Hypertension	0.2211	0.026277	0.034193	MAGMA, 5kb, UKB
Mitochondrion	1147	Primary Skin Malignancy	0.92283	-0.037662	0.02644	MAGMA, 5kb, UKB
Mitochondrion	1147	Cataracts	0.63285	-0.0082676	0.024359	MAGMA, 5kb, UKB
Mitochondrion	1147	Atrial Fibrillation	0.11528	0.030082	0.02509	MAGMA, 5kb, UKB
Mitochondrion	1147	Myocardial Infarction	0.55419	-0.0034213	0.02511	MAGMA, 5kb, UKB
Mitochondrion	1147	Coronary Artery Disease	0.73276	-0.01651	0.026578	MAGMA, 5kb, UKB
Mitochondrion	1147	GERD	0.41463	0.0051043	0.023669	MAGMA, 5kb, UKB
Mitochondrion	1147	Diaphragmatic Hernia	0.381	0.0071501	0.023609	MAGMA, 5kb, UKB
Mitochondrion	1147	Diverticular Disease	0.17289	0.023685	0.025121	MAGMA, 5kb, UKB
Mitochondrion	1147	Glucose	0.12027	0.035232	0.030019	MAGMA, 5kb, UKB
Mitochondrion	1147	HDL-C	0.55377	-0.0054037	0.039968	MAGMA, 5kb, UKB
Mitochondrion	1147	Angina	0.95115	-0.041982	0.025349	MAGMA, 5kb, UKB
Mitochondrion	1147	LDL-C	0.70242	-0.01848	0.034779	MAGMA, 5kb, UKB
Mitochondrion	1147	Triglycerides	0.8514	-0.040463	0.038813	MAGMA, 5kb, UKB
Mitochondrion	1147	Osteoarthritis	0.073982	0.036129	0.024971	MAGMA, 5kb, UKB
Mitochondrion	1147	Raised Total Cholesterol	0.99461	-0.073811	0.028945	MAGMA, 5kb, UKB
Mitochondrion	1147	Type 2 Diabetes Mellitus	0.52166	-0.0015297	0.028154	MAGMA, 5kb, UKB
Mitochondrion	1147	Osteoporosis/BMD	0.42149	0.0073446	0.03708	MAGMA, 5kb, UKB
Mitochondrion	1147	Deafness	0.1994	0.020165	0.023898	MAGMA, 5kb, UKB
Mitochondrion	1147	Diastolic BP	0.33315	0.014773	0.034257	MAGMA, 5kb, UKB
Mitochondrion	1147	Systolic BP	0.21866	0.026944	0.034689	MAGMA, 5kb, UKB
All Nucleus	6172	Hypertension	3.1143e-06	0.083096	0.018384	MAGMA, 5kb, UKB
All Nucleus	6172	Primary Skin Malignancy	0.11526	0.017054	0.014223	MAGMA, 5kb, UKB
All Nucleus	6172	Cataracts	0.14638	0.013785	0.013102	MAGMA, 5kb, UKB
All Nucleus	6172	Atrial Fibrillation	0.083203	0.018677	0.013496	MAGMA, 5kb, UKB
All Nucleus	6172	Myocardial Infarction	0.13069	0.01517	0.013506	MAGMA, 5kb, UKB
All Nucleus	6172	Coronary Artery Disease	0.14611	0.015058	0.014296	MAGMA, 5kb, UKB
All Nucleus	6172	GERD	0.44661	0.001709	0.012732	MAGMA, 5kb, UKB
All Nucleus	6172	Diaphragmatic Hernia	0.16799	0.012218	0.012699	MAGMA, 5kb, UKB
All Nucleus	6172	Diverticular Disease	0.55333	-0.0018118	0.013513	MAGMA, 5kb, UKB
All Nucleus	6172	Glucose	8.4449e-05	0.060863	0.016177	MAGMA, 5kb, UKB
All Nucleus	6172	HDL-C	1.9096e-06	0.099468	0.021518	MAGMA, 5kb, UKB
All Nucleus	6172	Angina	0.024618	0.026819	0.013637	MAGMA, 5kb, UKB
All Nucleus	6172	LDL-C	0.048278	0.031072	0.018697	MAGMA, 5kb, UKB
All Nucleus	6172	Triglycerides	0.00017998	0.074486	0.020873	MAGMA, 5kb, UKB
All Nucleus	6172	Osteoarthritis	0.16547	0.013062	0.013435	MAGMA, 5kb, UKB
All Nucleus	6172	Raised Total Cholesterol	1.2437e-05	0.065647	0.015567	MAGMA, 5kb, UKB
All Nucleus	6172	Type 2 Diabetes Mellitus	0.00079137	0.047784	0.015123	MAGMA, 5kb, UKB
All Nucleus	6172	Osteoporosis/BMD	5.7296e-05	0.07746	0.020076	MAGMA, 5kb, UKB
All Nucleus	6172	Deafness	0.35387	0.0048108	0.012833	MAGMA, 5kb, UKB
All Nucleus	6172	Diastolic BP	0.00010222	0.068204	0.018363	MAGMA, 5kb, UKB
All Nucleus	6172	Systolic BP	0.00013721	0.067666	0.018594	MAGMA, 5kb, UKB
OXPHOS Genes	129	Hypertension	0.42105	0.020063	0.10071	MAGMA, 5kb, UKB
OXPHOS Genes	129	Primary Skin Malignancy	0.52962	-0.0057873	0.077877	MAGMA, 5kb, UKB
OXPHOS Genes	129	Cataracts	0.69532	-0.036659	0.071741	MAGMA, 5kb, UKB
OXPHOS Genes	129	Atrial Fibrillation	0.036556	0.13243	0.073891	MAGMA, 5kb, UKB
OXPHOS Genes	129	Myocardial Infarction	0.28596	0.041801	0.073953	MAGMA, 5kb, UKB
OXPHOS Genes	129	Coronary Artery Disease	0.022385	0.15708	0.078267	MAGMA, 5kb, UKB
OXPHOS Genes	129	GERD	0.8977	-0.088431	0.069707	MAGMA, 5kb, UKB
OXPHOS Genes	129	Diaphragmatic Hernia	0.3393	0.028813	0.069532	MAGMA, 5kb, UKB
OXPHOS Genes	129	Diverticular Disease	0.89753	-0.09379	0.073986	MAGMA, 5kb, UKB
OXPHOS Genes	129	Glucose	0.83658	-0.08609	0.087801	MAGMA, 5kb, UKB
OXPHOS Genes	129	HDL-C	0.66922	-0.051173	0.11689	MAGMA, 5kb, UKB
OXPHOS Genes	129	Angina	0.57399	-0.013928	0.074666	MAGMA, 5kb, UKB
OXPHOS Genes	129	LDL-C	0.54088	-0.01053	0.10257	MAGMA, 5kb, UKB
OXPHOS Genes	129	Triglycerides	0.75087	-0.077525	0.11447	MAGMA, 5kb, UKB
OXPHOS Genes	129	Osteoarthritis	0.75528	-0.05084	0.073551	MAGMA, 5kb, UKB
OXPHOS Genes	129	Raised Total Cholesterol	0.30054	0.044583	0.085268	MAGMA, 5kb, UKB
OXPHOS Genes	129	Type 2 Diabetes Mellitus	0.93964	-0.12856	0.082845	MAGMA, 5kb, UKB
OXPHOS Genes	129	Osteoporosis/BMD	0.33559	0.045769	0.10781	MAGMA, 5kb, UKB
OXPHOS Genes	129	Deafness	0.73415	-0.043902	0.070194	MAGMA, 5kb, UKB
OXPHOS Genes	129	Diastolic BP	0.24439	0.069346	0.10017	MAGMA, 5kb, UKB
OXPHOS Genes	129	Systolic BP	0.43844	0.015716	0.10144	MAGMA, 5kb, UKB
Plasma membrane	4155	Hypertension	0.99376	-0.053916	0.021578	MAGMA, 5kb, UKB
Plasma membrane	4155	Primary Skin Malignancy	0.29996	0.0087518	0.016685	MAGMA, 5kb, UKB
Plasma membrane	4155	Cataracts	0.28326	0.0088106	0.015371	MAGMA, 5kb, UKB
Plasma membrane	4155	Atrial Fibrillation	0.43147	0.0027335	0.015833	MAGMA, 5kb, UKB
Plasma membrane	4155	Myocardial Infarction	0.62204	-0.0049252	0.015845	MAGMA, 5kb, UKB
Plasma membrane	4155	Coronary Artery Disease	0.80092	-0.014171	0.016771	MAGMA, 5kb, UKB
Plasma membrane	4155	GERD	0.32389	0.0068236	0.014936	MAGMA, 5kb, UKB
Plasma membrane	4155	Diaphragmatic Hernia	0.24306	0.010376	0.014898	MAGMA, 5kb, UKB
Plasma membrane	4155	Diverticular Disease	0.40104	0.0039738	0.015853	MAGMA, 5kb, UKB
Plasma membrane	4155	Glucose	0.96031	-0.033347	0.019007	MAGMA, 5kb, UKB
Plasma membrane	4155	HDL-C	0.99836	-0.074316	0.025278	MAGMA, 5kb, UKB
Plasma membrane	4155	Angina	0.12451	0.018444	0.016	MAGMA, 5kb, UKB
Plasma membrane	4155	LDL-C	0.88221	-0.026077	0.021984	MAGMA, 5kb, UKB
Plasma membrane	4155	Triglycerides	0.7085	-0.013472	0.024538	MAGMA, 5kb, UKB
Plasma membrane	4155	Osteoarthritis	0.89914	-0.020123	0.015761	MAGMA, 5kb, UKB
Plasma membrane	4155	Raised Total Cholesterol	0.48409	0.00072911	0.018273	MAGMA, 5kb, UKB
Plasma membrane	4155	Type 2 Diabetes Mellitus	0.97252	-0.034088	0.017761	MAGMA, 5kb, UKB
Plasma membrane	4155	Osteoporosis/BMD	0.88767	-0.028659	0.023601	MAGMA, 5kb, UKB
Plasma membrane	4155	Deafness	0.75542	-0.010439	0.015093	MAGMA, 5kb, UKB
Plasma membrane	4155	Diastolic BP	0.87745	-0.02509	0.021585	MAGMA, 5kb, UKB
Plasma membrane	4155	Systolic BP	0.75584	-0.015143	0.021852	MAGMA, 5kb, UKB
Visceral Adipose (Omentum)	2462	Hypertension	0.001341	0.074157	0.024699	MAGMA, 5kb, UKB
Visceral Adipose (Omentum)	2462	Primary Skin Malignancy	0.10747	0.023964	0.019324	MAGMA, 5kb, UKB
Visceral Adipose (Omentum)	2462	Cataracts	0.086563	0.024458	0.017954	MAGMA, 5kb, UKB
Visceral Adipose (Omentum)	2462	Atrial Fibrillation	0.0060483	0.046255	0.018432	MAGMA, 5kb, UKB
Visceral Adipose (Omentum)	2462	Myocardial Infarction	0.00029028	0.063695	0.01851	MAGMA, 5kb, UKB
Visceral Adipose (Omentum)	2462	Coronary Artery Disease	0.2814	0.01128	0.019492	MAGMA, 5kb, UKB
Visceral Adipose (Omentum)	2462	GERD	0.90743	-0.023256	0.01755	MAGMA, 5kb, UKB
Visceral Adipose (Omentum)	2462	Diaphragmatic Hernia	0.033389	0.031946	0.017426	MAGMA, 5kb, UKB
Visceral Adipose (Omentum)	2462	Diverticular Disease	0.41278	0.0040769	0.018497	MAGMA, 5kb, UKB
Visceral Adipose (Omentum)	2462	Glucose	0.47595	0.0013096	0.021714	MAGMA, 5kb, UKB
Visceral Adipose (Omentum)	2462	HDL-C	7.7865e-06	0.12313	0.028492	MAGMA, 5kb, UKB
Visceral Adipose (Omentum)	2462	Angina	0.32058	0.0086607	0.018582	MAGMA, 5kb, UKB
Visceral Adipose (Omentum)	2462	LDL-C	0.00015818	0.08877	0.024644	MAGMA, 5kb, UKB
Visceral Adipose (Omentum)	2462	Triglycerides	1.8452e-05	0.11407	0.02764	MAGMA, 5kb, UKB
Visceral Adipose (Omentum)	2462	Osteoarthritis	0.61024	-0.0051427	0.01837	MAGMA, 5kb, UKB
[truncated: 1,578 more rows]
