# Supplementary material for: Human genetic analyses of organelles highlight the nucleus in age-related trait heritability
Source: eLife. 2021 Sep 1;10:e68610. doi: 10.7554/eLife.68610 (PMC8476128; doi:10.7554/eLife.68610)
Supplement: Source data 2. [file elife-68610-data2.xlsx]

## Sheet: Sheet1
Gupta et al. 2021 Source data 2: mtDNA GWAS summary statistics.
Linear regression correcting for baseline characteristics and SNP-array type								Linear regression correcting for only baseline characteristics								Linear regression for continuous traits, logistic regression (Firth) for binary traits, controlling for baseline characterstics
variant	variant_id	MAF	beta	beta_se	p_value	phenotype		variant	variant_id	MAF	beta	beta_se	p_value	phenotype		variant	variant_id	MAF	beta	beta_se	chi_sq_stat	p_value	phenotype
MT:73:A:G	Affx-79504644	0.54891	-0.00094138	0.00071245	0.18639	20002_1065		MT:73:A:G	Affx-79504644	0.54891	-0.00092681	0.00071252	0.19335	20002_1065		MT:73:A:G	Affx-79504644	0.54891	-0.0050659	NA	1.6543	0.19838	20002_1065
MT:73:A:G	Affx-79504644	0.54891	9.7436e-05	0.00028863	0.73568	20002_1074		MT:73:A:G	Affx-79504644	0.54891	0.00010471	0.00028866	0.71681	20002_1074		MT:73:A:G	Affx-79504644	0.54891	0.003671	NA	0.14234	0.70596	20002_1074
MT:73:A:G	Affx-79504644	0.54891	-0.00077277	0.00045566	0.089897	20002_1465		MT:73:A:G	Affx-79504644	0.54891	-0.0007667	0.00045568	0.092468	20002_1465		MT:73:A:G	Affx-79504644	0.54891	-0.010255	NA	2.7735	0.095837	20002_1465
MT:73:A:G	Affx-79504644	0.54891	-0.00083224	0.0005339	0.11904	20002_1473		MT:73:A:G	Affx-79504644	0.54891	-0.00082106	0.00053397	0.12414	20002_1473		MT:73:A:G	Affx-79504644	0.54891	-0.0079341	NA	2.2799	0.13106	20002_1473
MT:73:A:G	Affx-79504644	0.54891	-0.00014026	0.00035583	0.69345	2443		MT:73:A:G	Affx-79504644	0.54891	-0.00012771	0.00035594	0.71974	2443		MT:73:A:G	Affx-79504644	0.54891	-0.00272	NA	0.11839	0.73079	2443
MT:73:A:G	Affx-79504644	0.54891	0.0053156	0.0016268	0.0010854	30650_irnt		MT:73:A:G	Affx-79504644	0.54891	0.0053131	0.0016268	0.0010913	30650_irnt		MT:73:A:G	Affx-79504644	0.54891	0.0053131	0.0016268	NA	0.0010913	30650_irnt
MT:73:A:G	Affx-79504644	0.54891	-0.0069755	0.0013784	4.1821e-07	30700_irnt		MT:73:A:G	Affx-79504644	0.54891	-0.0069895	0.0013784	3.9679e-07	30700_irnt		MT:73:A:G	Affx-79504644	0.54891	-0.0069895	0.0013784	NA	3.9679e-07	30700_irnt
MT:73:A:G	Affx-79504644	0.54891	0.0015248	0.001768	0.38842	30740_irnt		MT:73:A:G	Affx-79504644	0.54891	0.0015389	0.001768	0.38408	30740_irnt		MT:73:A:G	Affx-79504644	0.54891	0.0015389	0.001768	NA	0.38408	30740_irnt
MT:73:A:G	Affx-79504644	0.54891	-0.00073227	0.0016183	0.65091	30760_irnt		MT:73:A:G	Affx-79504644	0.54891	-0.00080825	0.001619	0.61761	30760_irnt		MT:73:A:G	Affx-79504644	0.54891	-0.00080825	0.001619	NA	0.61761	30760_irnt
MT:73:A:G	Affx-79504644	0.54891	-0.0010376	0.0016749	0.53561	30780_irnt		MT:73:A:G	Affx-79504644	0.54891	-0.0010459	0.0016749	0.53233	30780_irnt		MT:73:A:G	Affx-79504644	0.54891	-0.0010459	0.0016749	NA	0.53233	30780_irnt
MT:73:A:G	Affx-79504644	0.54891	0.0015464	0.0016494	0.34847	30870_irnt		MT:73:A:G	Affx-79504644	0.54891	0.0016108	0.0016502	0.329	30870_irnt		MT:73:A:G	Affx-79504644	0.54891	0.0016108	0.0016502	NA	0.329	30870_irnt
MT:73:A:G	Affx-79504644	0.54891	-0.002024	0.0021385	0.34391	3148_irnt		MT:73:A:G	Affx-79504644	0.54891	-0.0020471	0.0021386	0.33846	3148_irnt		MT:73:A:G	Affx-79504644	0.54891	-0.0020471	0.0021386	NA	0.33846	3148_irnt
MT:73:A:G	Affx-79504644	0.54891	8.622e-05	0.00046254	0.85213	3393		MT:73:A:G	Affx-79504644	0.54891	8.3927e-05	0.00046253	0.85601	3393		MT:73:A:G	Affx-79504644	0.54891	0.0019308	NA	0.037324	0.84681	3393
MT:73:A:G	Affx-79504644	0.54891	-0.00052584	0.0016901	0.7557	4079_irnt		MT:73:A:G	Affx-79504644	0.54891	-0.00052491	0.0016901	0.75612	4079_irnt		MT:73:A:G	Affx-79504644	0.54891	-0.00052491	0.0016901	NA	0.75612	4079_irnt
MT:73:A:G	Affx-79504644	0.54891	0.0011576	0.0016003	0.46945	4080_irnt		MT:73:A:G	Affx-79504644	0.54891	0.0011735	0.0016004	0.46342	4080_irnt		MT:73:A:G	Affx-79504644	0.54891	0.0011735	0.0016004	NA	0.46342	4080_irnt
MT:73:A:G	Affx-79504644	0.54891	0.00014594	0.00034774	0.67473	C3_SKIN		MT:73:A:G	Affx-79504644	0.54891	0.00014442	0.00034774	0.67791	C3_SKIN		MT:73:A:G	Affx-79504644	0.54891	0.0031919	NA	0.15636	0.69253	C3_SKIN
MT:73:A:G	Affx-79504644	0.54891	0.00027763	0.00029648	0.34904	H26		MT:73:A:G	Affx-79504644	0.54891	0.00027815	0.00029647	0.34814	H26		MT:73:A:G	Affx-79504644	0.54891	0.0087981	NA	0.86254	0.35303	H26
MT:73:A:G	Affx-79504644	0.54891	-0.00025814	0.00022543	0.25216	I48		MT:73:A:G	Affx-79504644	0.54891	-0.00025682	0.00022543	0.2546	I48		MT:73:A:G	Affx-79504644	0.54891	-0.014141	NA	1.2927	0.25554	I48
MT:73:A:G	Affx-79504644	0.54891	0.00024229	0.00027414	0.37679	I9_CHD		MT:73:A:G	Affx-79504644	0.54891	0.0002476	0.00027418	0.36649	I9_CHD		MT:73:A:G	Affx-79504644	0.54891	0.0091572	NA	0.79899	0.3714	I9_CHD
MT:73:A:G	Affx-79504644	0.54891	5.8982e-05	0.00038237	0.87741	I9_IHD		MT:73:A:G	Affx-79504644	0.54891	6.9845e-05	0.00038244	0.85509	I9_IHD		MT:73:A:G	Affx-79504644	0.54891	0.0012857	NA	0.030671	0.86098	I9_IHD
MT:73:A:G	Affx-79504644	0.54891	-0.00029165	0.00029177	0.31751	K21		MT:73:A:G	Affx-79504644	0.54891	-0.0002895	0.00029178	0.3211	K21		MT:73:A:G	Affx-79504644	0.54891	-0.0094487	NA	0.96627	0.32561	K21
MT:73:A:G	Affx-79504644	0.54891	2.8053e-05	0.00025298	0.9117	K44		MT:73:A:G	Affx-79504644	0.54891	2.98e-05	0.00025298	0.90623	K44		MT:73:A:G	Affx-79504644	0.54891	0.0014076	NA	0.016095	0.89905	K44
MT:73:A:G	Affx-79504644	0.54891	-1.2082e-06	0.00031359	0.99693	K57		MT:73:A:G	Affx-79504644	0.54891	1.6202e-06	0.0003136	0.99588	K57		MT:73:A:G	Affx-79504644	0.54891	2.0118e-05	NA	5.0609e-06	0.99821	K57
MT:150:C:T	Affx-52321525	0.092293	-0.0013197	0.001225	0.28135	20002_1065		MT:150:C:T	Affx-52321525	0.092293	-0.0013067	0.0012251	0.28617	20002_1065		MT:150:C:T	Affx-52321525	0.092293	-0.0072879	NA	1.1548	0.28255	20002_1065
MT:150:C:T	Affx-52321525	0.092293	-0.00043618	0.00049628	0.37945	20002_1074		MT:150:C:T	Affx-52321525	0.092293	-0.00043245	0.00049634	0.38361	20002_1074		MT:150:C:T	Affx-52321525	0.092293	-0.015898	NA	0.8957	0.34394	20002_1074
MT:150:C:T	Affx-52321525	0.092293	-0.001036	0.00078348	0.18606	20002_1465		MT:150:C:T	Affx-52321525	0.092293	-0.0010291	0.00078353	0.18904	20002_1465		MT:150:C:T	Affx-52321525	0.092293	-0.014124	NA	1.7589	0.18477	20002_1465
MT:150:C:T	Affx-52321525	0.092293	-0.0016633	0.000918	0.070016	20002_1473		MT:150:C:T	Affx-52321525	0.092293	-0.0016505	0.00091814	0.07223	20002_1473		MT:150:C:T	Affx-52321525	0.092293	-0.016477	NA	3.2853	0.069903	20002_1473
MT:150:C:T	Affx-52321525	0.092293	-0.00039057	0.00061181	0.52322	2443		MT:150:C:T	Affx-52321525	0.092293	-0.00038192	0.000612	0.53259	2443		MT:150:C:T	Affx-52321525	0.092293	-0.0085347	NA	0.3913	0.53162	2443
MT:150:C:T	Affx-52321525	0.092293	-0.0035166	0.0027982	0.20885	30650_irnt		MT:150:C:T	Affx-52321525	0.092293	-0.0035208	0.0027982	0.20831	30650_irnt		MT:150:C:T	Affx-52321525	0.092293	-0.0035208	0.0027982	NA	0.20831	30650_irnt
MT:150:C:T	Affx-52321525	0.092293	-0.0056264	0.00237	0.017596	30700_irnt		MT:150:C:T	Affx-52321525	0.092293	-0.0056351	0.00237	0.017424	30700_irnt		MT:150:C:T	Affx-52321525	0.092293	-0.0056351	0.00237	NA	0.017424	30700_irnt
MT:150:C:T	Affx-52321525	0.092293	-0.0017598	0.0030435	0.56311	30740_irnt		MT:150:C:T	Affx-52321525	0.092293	-0.0017458	0.0030435	0.56623	30740_irnt		MT:150:C:T	Affx-52321525	0.092293	-0.0017458	0.0030435	NA	0.56623	30740_irnt
MT:150:C:T	Affx-52321525	0.092293	-0.0015782	0.0027858	0.57104	30760_irnt		MT:150:C:T	Affx-52321525	0.092293	-0.0016364	0.002787	0.55709	30760_irnt		MT:150:C:T	Affx-52321525	0.092293	-0.0016364	0.002787	NA	0.55709	30760_irnt
MT:150:C:T	Affx-52321525	0.092293	0.0018626	0.00288	0.51781	30780_irnt		MT:150:C:T	Affx-52321525	0.092293	0.0018613	0.00288	0.5181	30780_irnt		MT:150:C:T	Affx-52321525	0.092293	0.0018613	0.00288	NA	0.5181	30780_irnt
MT:150:C:T	Affx-52321525	0.092293	0.0032417	0.0028357	0.25296	30870_irnt		MT:150:C:T	Affx-52321525	0.092293	0.0032829	0.0028372	0.24723	30870_irnt		MT:150:C:T	Affx-52321525	0.092293	0.0032829	0.0028372	NA	0.24723	30870_irnt
MT:150:C:T	Affx-52321525	0.092293	-0.0012872	0.0036819	0.72665	3148_irnt		MT:150:C:T	Affx-52321525	0.092293	-0.0012792	0.003682	0.72828	3148_irnt		MT:150:C:T	Affx-52321525	0.092293	-0.0012792	0.003682	NA	0.72828	3148_irnt
MT:150:C:T	Affx-52321525	0.092293	-0.0019712	0.00079631	0.01331	3393		MT:150:C:T	Affx-52321525	0.092293	-0.0019724	0.0007963	0.013252	3393		MT:150:C:T	Affx-52321525	0.092293	-0.043575	NA	6.1723	0.012977	3393
MT:150:C:T	Affx-52321525	0.092293	0.00019769	0.0029094	0.94583	4079_irnt		MT:150:C:T	Affx-52321525	0.092293	0.00021182	0.0029094	0.94196	4079_irnt		MT:150:C:T	Affx-52321525	0.092293	0.00021182	0.0029094	NA	0.94196	4079_irnt
MT:150:C:T	Affx-52321525	0.092293	0.0035878	0.0027549	0.19281	4080_irnt		MT:150:C:T	Affx-52321525	0.092293	0.0036141	0.0027551	0.18959	4080_irnt		MT:150:C:T	Affx-52321525	0.092293	0.0036141	0.0027551	NA	0.18959	4080_irnt
MT:150:C:T	Affx-52321525	0.092293	0.00017066	0.0005979	0.77531	C3_SKIN		MT:150:C:T	Affx-52321525	0.092293	0.00016918	0.0005979	0.77721	C3_SKIN		MT:150:C:T	Affx-52321525	0.092293	0.0037289	NA	0.072672	0.78749	C3_SKIN
MT:150:C:T	Affx-52321525	0.092293	0.00052985	0.00050976	0.29861	H26		MT:150:C:T	Affx-52321525	0.092293	0.00053049	0.00050976	0.29803	H26		MT:150:C:T	Affx-52321525	0.092293	0.016422	NA	1.0349	0.30902	H26
MT:150:C:T	Affx-52321525	0.092293	-0.00036082	0.0003876	0.3519	I48		MT:150:C:T	Affx-52321525	0.092293	-0.00035931	0.0003876	0.35392	I48		MT:150:C:T	Affx-52321525	0.092293	-0.020117	NA	0.86763	0.35161	I48
MT:150:C:T	Affx-52321525	0.092293	-0.0001123	0.00047136	0.81169	I9_CHD		MT:150:C:T	Affx-52321525	0.092293	-0.00010639	0.00047142	0.82145	I9_CHD		MT:150:C:T	Affx-52321525	0.092293	-0.0047026	NA	0.071526	0.78913	I9_CHD
MT:150:C:T	Affx-52321525	0.092293	-0.00072665	0.00065744	0.26904	I9_IHD		MT:150:C:T	Affx-52321525	0.092293	-0.00071891	0.00065756	0.27426	I9_IHD		MT:150:C:T	Affx-52321525	0.092293	-0.01464	NA	1.3351	0.2479	I9_IHD
MT:150:C:T	Affx-52321525	0.092293	0.00016464	0.00050168	0.74277	K21		MT:150:C:T	Affx-52321525	0.092293	0.00016721	0.00050168	0.73891	K21		MT:150:C:T	Affx-52321525	0.092293	0.0056331	NA	0.11688	0.73244	K21
MT:150:C:T	Affx-52321525	0.092293	7.8151e-05	0.00043497	0.85741	K44		MT:150:C:T	Affx-52321525	0.092293	8.0156e-05	0.00043498	0.8538	K44		MT:150:C:T	Affx-52321525	0.092293	0.003518	NA	0.034208	0.85326	K44
MT:150:C:T	Affx-52321525	0.092293	-0.00086193	0.00053918	0.10991	K57		MT:150:C:T	Affx-52321525	0.092293	-0.00085873	0.0005392	0.11125	K57		MT:150:C:T	Affx-52321525	0.092293	-0.025295	NA	2.6447	0.1039	K57
MT:239:T:C	rs145412228	0.02913	-0.0036228	0.0063777	0.57001	20002_1065		MT:239:T:C	rs145412228	0.02913	-0.003619	0.0063784	0.57045	20002_1065		MT:239:T:C	rs145412228	0.02913	-0.019618	NA	0.31257	0.57611	20002_1065
MT:239:T:C	rs145412228	0.02913	-0.0037798	0.0025837	0.14349	20002_1074		MT:239:T:C	rs145412228	0.02913	-0.0037781	0.0025841	0.14372	20002_1074		MT:239:T:C	rs145412228	0.02913	-0.13082	NA	2.0405	0.15316	20002_1074
MT:239:T:C	rs145412228	0.02913	0.0073085	0.0040789	0.073173	20002_1465		MT:239:T:C	rs145412228	0.02913	0.0073101	0.0040792	0.073126	20002_1465		MT:239:T:C	rs145412228	0.02913	0.092473	NA	3.1069	0.077961	20002_1465
MT:239:T:C	rs145412228	0.02913	0.00078128	0.0047793	0.87015	20002_1473		MT:239:T:C	rs145412228	0.02913	0.00078427	0.00478	0.86967	20002_1473		MT:239:T:C	rs145412228	0.02913	0.0081962	NA	0.031591	0.85893	20002_1473
MT:239:T:C	rs145412228	0.02913	-0.0025508	0.0031879	0.42363	2443		MT:239:T:C	rs145412228	0.02913	-0.0025478	0.0031889	0.42432	2443		MT:239:T:C	rs145412228	0.02913	-0.05321	NA	0.55003	0.45831	2443
MT:239:T:C	rs145412228	0.02913	0.012094	0.014626	0.40832	30650_irnt		MT:239:T:C	rs145412228	0.02913	0.012093	0.014626	0.40834	30650_irnt		MT:239:T:C	rs145412228	0.02913	0.012093	0.014626	NA	0.40834	30650_irnt
MT:239:T:C	rs145412228	0.02913	0.013856	0.012384	0.26322	30700_irnt		MT:239:T:C	rs145412228	0.02913	0.013853	0.012385	0.26334	30700_irnt		MT:239:T:C	rs145412228	0.02913	0.013853	0.012385	NA	0.26334	30700_irnt
MT:239:T:C	rs145412228	0.02913	0.00053294	0.015879	0.97323	30740_irnt		MT:239:T:C	rs145412228	0.02913	0.00053223	0.015879	0.97326	30740_irnt		MT:239:T:C	rs145412228	0.02913	0.00053223	0.015879	NA	0.97326	30740_irnt
MT:239:T:C	rs145412228	0.02913	0.012244	0.014539	0.39972	30760_irnt		MT:239:T:C	rs145412228	0.02913	0.012241	0.014546	0.40002	30760_irnt		MT:239:T:C	rs145412228	0.02913	0.012241	0.014546	NA	0.40002	30760_irnt
MT:239:T:C	rs145412228	0.02913	0.010649	0.015058	0.47943	30780_irnt		MT:239:T:C	rs145412228	0.02913	0.010647	0.015058	0.4795	30780_irnt		MT:239:T:C	rs145412228	0.02913	0.010647	0.015058	NA	0.4795	30780_irnt
MT:239:T:C	rs145412228	0.02913	-0.0039675	0.014823	0.78896	30870_irnt		MT:239:T:C	rs145412228	0.02913	-0.003952	0.014831	0.78987	30870_irnt		MT:239:T:C	rs145412228	0.02913	-0.003952	0.014831	NA	0.78987	30870_irnt
MT:239:T:C	rs145412228	0.02913	0.011901	0.019312	0.53774	3148_irnt		MT:239:T:C	rs145412228	0.02913	0.011896	0.019313	0.53791	3148_irnt		MT:239:T:C	rs145412228	0.02913	0.011896	0.019313	NA	0.53791	3148_irnt
MT:239:T:C	rs145412228	0.02913	-0.002069	0.0040739	0.61154	3393		MT:239:T:C	rs145412228	0.02913	-0.0020698	0.0040739	0.61141	3393		MT:239:T:C	rs145412228	0.02913	-0.038055	NA	0.1818	0.66983	3393
MT:239:T:C	rs145412228	0.02913	0.02457	0.015027	0.10204	4079_irnt		MT:239:T:C	rs145412228	0.02913	0.02457	0.015027	0.10203	4079_irnt		MT:239:T:C	rs145412228	0.02913	0.02457	0.015027	NA	0.10203	4079_irnt
MT:239:T:C	rs145412228	0.02913	-0.0011626	0.014229	0.93488	4080_irnt		MT:239:T:C	rs145412228	0.02913	-0.0011586	0.01423	0.93511	4080_irnt		MT:239:T:C	rs145412228	0.02913	-0.0011586	0.01423	NA	0.93511	4080_irnt
MT:239:T:C	rs145412228	0.02913	0.0039268	0.0031131	0.20718	C3_SKIN		MT:239:T:C	rs145412228	0.02913	0.0039264	0.0031131	0.20722	C3_SKIN		MT:239:T:C	rs145412228	0.02913	0.086013	NA	1.5933	0.20685	C3_SKIN
MT:239:T:C	rs145412228	0.02913	0.0017895	0.0026542	0.50017	H26		MT:239:T:C	rs145412228	0.02913	0.0017897	0.0026542	0.50013	H26		MT:239:T:C	rs145412228	0.02913	0.060464	NA	0.54693	0.45957	H26
MT:239:T:C	rs145412228	0.02913	0.0015936	0.0020181	0.42974	I48		MT:239:T:C	rs145412228	0.02913	0.0015939	0.0020181	0.42964	I48		MT:239:T:C	rs145412228	0.02913	0.086733	NA	0.7025	0.40194	I48
MT:239:T:C	rs145412228	0.02913	-0.0037921	0.0024542	0.12231	I9_CHD		MT:239:T:C	rs145412228	0.02913	-0.0037907	0.0024545	0.1225	I9_CHD		MT:239:T:C	rs145412228	0.02913	-0.14581	NA	2.2678	0.13209	I9_CHD
MT:239:T:C	rs145412228	0.02913	0.003599	0.0034231	0.29309	I9_IHD		MT:239:T:C	rs145412228	0.02913	0.0036016	0.0034237	0.29282	I9_IHD		MT:239:T:C	rs145412228	0.02913	0.064092	NA	1.0671	0.30161	I9_IHD
MT:239:T:C	rs145412228	0.02913	0.00092421	0.0026121	0.72347	K21		MT:239:T:C	rs145412228	0.02913	0.0009248	0.0026121	0.72331	K21		MT:239:T:C	rs145412228	0.02913	0.034772	NA	0.17219	0.67817	K21
MT:239:T:C	rs145412228	0.02913	-0.0012675	0.0022648	0.5757	K44		MT:239:T:C	rs145412228	0.02913	-0.0012671	0.0022648	0.57585	K44		MT:239:T:C	rs145412228	0.02913	-0.050694	NA	0.24783	0.61861	K44
MT:239:T:C	rs145412228	0.02913	0.0020953	0.0028074	0.45545	K57		MT:239:T:C	rs145412228	0.02913	0.0020961	0.0028075	0.4553	K57		MT:239:T:C	rs145412228	0.02913	0.058707	NA	0.58533	0.44423	K57
MT:263:A:G	Affx-34461957	0.98969	0.0058049	0.0035123	0.098389	20002_1065		MT:263:A:G	Affx-34461957	0.98969	0.0057649	0.0035127	0.10077	20002_1065		MT:263:A:G	Affx-34461957	0.98969	0.031999	NA	2.6893	0.10102	20002_1065
MT:263:A:G	Affx-34461957	0.98969	0.00027699	0.0014229	0.84566	20002_1074		MT:263:A:G	Affx-34461957	0.98969	0.00026247	0.0014231	0.85367	20002_1074		MT:263:A:G	Affx-34461957	0.98969	0.0073173	NA	0.022793	0.88	20002_1074
MT:263:A:G	Affx-34461957	0.98969	-0.00054009	0.0022464	0.81	20002_1465		MT:263:A:G	Affx-34461957	0.98969	-0.0005597	0.0022465	0.80325	20002_1465		MT:263:A:G	Affx-34461957	0.98969	-0.0076171	NA	0.063253	0.80143	20002_1465
MT:263:A:G	Affx-34461957	0.98969	0.00099795	0.0026321	0.70458	20002_1473		MT:263:A:G	Affx-34461957	0.98969	0.0009618	0.0026325	0.71484	20002_1473		MT:263:A:G	Affx-34461957	0.98969	0.0091317	NA	0.12502	0.72365	20002_1473
MT:263:A:G	Affx-34461957	0.98969	0.0011725	0.0017561	0.50435	2443		MT:263:A:G	Affx-34461957	0.98969	0.0011371	0.0017567	0.51743	2443		MT:263:A:G	Affx-34461957	0.98969	0.024393	NA	0.38507	0.5349	2443
MT:263:A:G	Affx-34461957	0.98969	0.0031883	0.0080138	0.69073	30650_irnt		MT:263:A:G	Affx-34461957	0.98969	0.0032055	0.0080137	0.68916	30650_irnt		MT:263:A:G	Affx-34461957	0.98969	0.0032055	0.0080137	NA	0.68916	30650_irnt
MT:263:A:G	Affx-34461957	0.98969	-0.015757	0.0067885	0.020278	30700_irnt		MT:263:A:G	Affx-34461957	0.98969	-0.015711	0.0067887	0.020655	30700_irnt		MT:263:A:G	Affx-34461957	0.98969	-0.015711	0.0067887	NA	0.020655	30700_irnt
MT:263:A:G	Affx-34461957	0.98969	0.0079144	0.0086959	0.36275	30740_irnt		MT:263:A:G	Affx-34461957	0.98969	0.0078572	0.008696	0.36624	30740_irnt		MT:263:A:G	Affx-34461957	0.98969	0.0078572	0.008696	NA	0.36624	30740_irnt
MT:263:A:G	Affx-34461957	0.98969	-0.00021073	0.0079514	0.97886	30760_irnt		MT:263:A:G	Affx-34461957	0.98969	1.2435e-05	0.0079549	0.99875	30760_irnt		MT:263:A:G	Affx-34461957	0.98969	1.2435e-05	0.0079549	NA	0.99875	30760_irnt
MT:263:A:G	Affx-34461957	0.98969	0.0039307	0.0082521	0.63384	30780_irnt		MT:263:A:G	Affx-34461957	0.98969	0.0039489	0.0082521	0.63227	30780_irnt		MT:263:A:G	Affx-34461957	0.98969	0.0039489	0.0082521	NA	0.63227	30780_irnt
MT:263:A:G	Affx-34461957	0.98969	0.006036	0.0081238	0.45748	30870_irnt		MT:263:A:G	Affx-34461957	0.98969	0.0058158	0.0081281	0.47429	30870_irnt		MT:263:A:G	Affx-34461957	0.98969	0.0058158	0.0081281	NA	0.47429	30870_irnt
MT:263:A:G	Affx-34461957	0.98969	-0.0036874	0.010503	0.72552	3148_irnt		MT:263:A:G	Affx-34461957	0.98969	-0.0036495	0.010503	0.72823	3148_irnt		MT:263:A:G	Affx-34461957	0.98969	-0.0036495	0.010503	NA	0.72823	3148_irnt
MT:263:A:G	Affx-34461957	0.98969	-0.0018657	0.0022622	0.40952	3393		MT:263:A:G	Affx-34461957	0.98969	-0.0018611	0.0022622	0.41069	3393		MT:263:A:G	Affx-34461957	0.98969	-0.041379	NA	0.75419	0.38515	3393
MT:263:A:G	Affx-34461957	0.98969	-0.0011282	0.0082637	0.8914	4079_irnt		MT:263:A:G	Affx-34461957	0.98969	-0.0011573	0.0082638	0.88862	4079_irnt		MT:263:A:G	Affx-34461957	0.98969	-0.0011573	0.0082638	NA	0.88862	4079_irnt
MT:263:A:G	Affx-34461957	0.98969	0.0092958	0.0078248	0.23484	4080_irnt		MT:263:A:G	Affx-34461957	0.98969	0.009228	0.0078254	0.2383	4080_irnt		MT:263:A:G	Affx-34461957	0.98969	0.009228	0.0078254	NA	0.2383	4080_irnt
MT:263:A:G	Affx-34461957	0.98969	-0.0033949	0.0017145	0.047686	C3_SKIN		MT:263:A:G	Affx-34461957	0.98969	-0.0033904	0.0017145	0.047978	C3_SKIN		MT:263:A:G	Affx-34461957	0.98969	-0.075482	NA	3.9166	0.04781	C3_SKIN
MT:263:A:G	Affx-34461957	0.98969	0.00093906	0.0014617	0.52059	H26		MT:263:A:G	Affx-34461957	0.98969	0.00093727	0.0014617	0.52138	H26		MT:263:A:G	Affx-34461957	0.98969	0.027282	NA	0.33249	0.5642	H26
MT:263:A:G	Affx-34461957	0.98969	-0.001148	0.0011114	0.30165	I48		MT:263:A:G	Affx-34461957	0.98969	-0.0011523	0.0011114	0.29984	I48		MT:263:A:G	Affx-34461957	0.98969	-0.062106	NA	1.1268	0.28845	I48
MT:263:A:G	Affx-34461957	0.98969	0.00052488	0.0013516	0.69777	I9_CHD		MT:263:A:G	Affx-34461957	0.98969	0.00050784	0.0013518	0.70715	I9_CHD		MT:263:A:G	Affx-34461957	0.98969	0.016521	NA	0.10452	0.74647	I9_CHD
MT:263:A:G	Affx-34461957	0.98969	0.00222	0.0018852	0.23896	I9_IHD		MT:263:A:G	Affx-34461957	0.98969	0.0021938	0.0018855	0.24463	I9_IHD		MT:263:A:G	Affx-34461957	0.98969	0.042107	NA	1.2966	0.25483	I9_IHD
MT:263:A:G	Affx-34461957	0.98969	-0.0036981	0.0014385	0.010148	K21		MT:263:A:G	Affx-34461957	0.98969	-0.0037054	0.0014385	0.010002	K21		MT:263:A:G	Affx-34461957	0.98969	-0.11253	NA	6.4319	0.011209	K21
MT:263:A:G	Affx-34461957	0.98969	-0.00079317	0.0012473	0.52482	K44		MT:263:A:G	Affx-34461957	0.98969	-0.00079891	0.0012473	0.52184	K44		MT:263:A:G	Affx-34461957	0.98969	-0.036671	NA	0.46645	0.49463	K44
MT:263:A:G	Affx-34461957	0.98969	-0.0037141	0.0015461	0.016296	K57		MT:263:A:G	Affx-34461957	0.98969	-0.0037232	0.0015461	0.016036	K57		MT:263:A:G	Affx-34461957	0.98969	-0.10022	NA	5.7105	0.016863	K57
MT:295:C:T	Affx-92047869	0.10806	-0.00071792	0.0012146	0.55446	20002_1065		MT:295:C:T	Affx-92047869	0.10806	-0.000722	0.0012147	0.55225	20002_1065		MT:295:C:T	Affx-92047869	0.10806	-0.003886	NA	0.33311	0.56384	20002_1065
MT:295:C:T	Affx-92047869	0.10806	0.0010444	0.00049204	0.03379	20002_1074		MT:295:C:T	Affx-92047869	0.10806	0.001042	0.0004921	0.034225	20002_1074		MT:295:C:T	Affx-92047869	0.10806	0.035886	NA	4.8001	0.028459	20002_1074
MT:295:C:T	Affx-92047869	0.10806	0.00039096	0.0007768	0.61476	20002_1465		MT:295:C:T	Affx-92047869	0.10806	0.00039021	0.00077683	0.61545	20002_1465		MT:295:C:T	Affx-92047869	0.10806	0.0053127	NA	0.25799	0.61151	20002_1465
MT:295:C:T	Affx-92047869	0.10806	-0.00065357	0.00091018	0.47272	20002_1473		MT:295:C:T	Affx-92047869	0.10806	-0.00065514	0.0009103	0.47171	20002_1473		MT:295:C:T	Affx-92047869	0.10806	-0.0062524	NA	0.4811	0.48792	20002_1473
MT:295:C:T	Affx-92047869	0.10806	0.001358	0.00060661	0.025182	2443		MT:295:C:T	Affx-92047869	0.10806	0.0013548	0.00060679	0.025567	2443		MT:295:C:T	Affx-92047869	0.10806	0.030182	NA	5.1019	0.023899	2443
MT:295:C:T	Affx-92047869	0.10806	-0.0011471	0.0027732	0.67914	30650_irnt		MT:295:C:T	Affx-92047869	0.10806	-0.0011439	0.0027731	0.67998	30650_irnt		MT:295:C:T	Affx-92047869	0.10806	-0.0011439	0.0027731	NA	0.67998	30650_irnt
MT:295:C:T	Affx-92047869	0.10806	0.008	0.0023495	0.0006617	30700_irnt		MT:295:C:T	Affx-92047869	0.10806	0.0080095	0.0023495	0.00065213	30700_irnt		MT:295:C:T	Affx-92047869	0.10806	0.0080095	0.0023495	NA	0.00065213	30700_irnt
MT:295:C:T	Affx-92047869	0.10806	-0.0063631	0.0030185	0.035029	30740_irnt		MT:295:C:T	Affx-92047869	0.10806	-0.0063766	0.0030185	0.034646	30740_irnt		MT:295:C:T	Affx-92047869	0.10806	-0.0063766	0.0030185	NA	0.034646	30740_irnt
MT:295:C:T	Affx-92047869	0.10806	0.00056094	0.0027627	0.8391	30760_irnt		MT:295:C:T	Affx-92047869	0.10806	0.00055994	0.0027639	0.83945	30760_irnt		MT:295:C:T	Affx-92047869	0.10806	0.00055994	0.0027639	NA	0.83945	30760_irnt
MT:295:C:T	Affx-92047869	0.10806	-0.0053463	0.0028549	0.061112	30780_irnt		MT:295:C:T	Affx-92047869	0.10806	-0.0053453	0.0028549	0.061159	30780_irnt		MT:295:C:T	Affx-92047869	0.10806	-0.0053453	0.0028549	NA	0.061159	30780_irnt
MT:295:C:T	Affx-92047869	0.10806	-0.0043686	0.0028115	0.12022	30870_irnt		MT:295:C:T	Affx-92047869	0.10806	-0.0043823	0.0028129	0.11925	30870_irnt		MT:295:C:T	Affx-92047869	0.10806	-0.0043823	0.0028129	NA	0.11925	30870_irnt
MT:295:C:T	Affx-92047869	0.10806	0.0056599	0.0036422	0.12019	3148_irnt		MT:295:C:T	Affx-92047869	0.10806	0.0056622	0.0036423	0.12005	3148_irnt		MT:295:C:T	Affx-92047869	0.10806	0.0056622	0.0036423	NA	0.12005	3148_irnt
MT:295:C:T	Affx-92047869	0.10806	-0.00015951	0.00079228	0.84044	3393		MT:295:C:T	Affx-92047869	0.10806	-0.00015976	0.00079226	0.84018	3393		MT:295:C:T	Affx-92047869	0.10806	-0.0027779	NA	0.026284	0.87121	3393
MT:295:C:T	Affx-92047869	0.10806	0.00013795	0.002893	0.96197	4079_irnt		MT:295:C:T	Affx-92047869	0.10806	0.00013803	0.002893	0.96195	4079_irnt		MT:295:C:T	Affx-92047869	0.10806	0.00013803	0.002893	NA	0.96195	4079_irnt
MT:295:C:T	Affx-92047869	0.10806	-0.00063155	0.0027393	0.81767	4080_irnt		MT:295:C:T	Affx-92047869	0.10806	-0.0006321	0.0027395	0.81752	4080_irnt		MT:295:C:T	Affx-92047869	0.10806	-0.0006321	0.0027395	NA	0.81752	4080_irnt
MT:295:C:T	Affx-92047869	0.10806	-0.00049837	0.00059279	0.40051	C3_SKIN		MT:295:C:T	Affx-92047869	0.10806	-0.00049829	0.00059279	0.40058	C3_SKIN		MT:295:C:T	Affx-92047869	0.10806	-0.011405	NA	0.67944	0.40978	C3_SKIN
MT:295:C:T	Affx-92047869	0.10806	0.00046289	0.00050541	0.35973	H26		MT:295:C:T	Affx-92047869	0.10806	0.0004627	0.0005054	0.35992	H26		MT:295:C:T	Affx-92047869	0.10806	0.015491	NA	0.93566	0.3334	H26
MT:295:C:T	Affx-92047869	0.10806	-3.106e-05	0.00038429	0.93558	I48		MT:295:C:T	Affx-92047869	0.10806	-3.1224e-05	0.00038429	0.93524	I48		MT:295:C:T	Affx-92047869	0.10806	-0.0011893	NA	0.0030948	0.95564	I48
MT:295:C:T	Affx-92047869	0.10806	0.00076037	0.00046733	0.10373	I9_CHD		MT:295:C:T	Affx-92047869	0.10806	0.00075979	0.00046738	0.10403	I9_CHD		MT:295:C:T	Affx-92047869	0.10806	0.029018	NA	2.8129	0.093506	I9_CHD
MT:295:C:T	Affx-92047869	0.10806	0.001099	0.00065182	0.09178	I9_IHD		MT:295:C:T	Affx-92047869	0.10806	0.0010963	0.00065193	0.092655	I9_IHD		MT:295:C:T	Affx-92047869	0.10806	0.021678	NA	3.0238	0.082052	I9_IHD
MT:295:C:T	Affx-92047869	0.10806	-0.00015567	0.00049739	0.75431	K21		MT:295:C:T	Affx-92047869	0.10806	-0.0001562	0.00049739	0.75349	K21		MT:295:C:T	Affx-92047869	0.10806	-0.0048957	NA	0.08869	0.76585	K21
MT:295:C:T	Affx-92047869	0.10806	0.00031001	0.00043125	0.47223	K44		MT:295:C:T	Affx-92047869	0.10806	0.00030971	0.00043125	0.47265	K44		MT:295:C:T	Affx-92047869	0.10806	0.014019	NA	0.56244	0.45328	K44
MT:295:C:T	Affx-92047869	0.10806	-0.00011106	0.00053458	0.83542	K57		MT:295:C:T	Affx-92047869	0.10806	-0.00011138	0.00053459	0.83496	K57		MT:295:C:T	Affx-92047869	0.10806	-0.0025545	NA	0.028071	0.86694	K57
MT:456:C:T	Affx-79381653	0.039063	0.0052728	0.0055385	0.34108	20002_1065		MT:456:C:T	Affx-79381653	0.039063	0.0052771	0.0055391	0.34074	20002_1065		MT:456:C:T	Affx-79381653	0.039063	0.028575	NA	0.89699	0.34359	20002_1065
MT:456:C:T	Affx-79381653	0.039063	0.0049502	0.0022437	0.027367	20002_1074		MT:456:C:T	Affx-79381653	0.039063	0.0049519	0.002244	0.027336	20002_1074		MT:456:C:T	Affx-79381653	0.039063	0.14517	NA	4.5533	0.032856	20002_1074
MT:456:C:T	Affx-79381653	0.039063	-0.0028728	0.0035423	0.41737	20002_1465		MT:456:C:T	Affx-79381653	0.039063	-0.0028707	0.0035425	0.41773	20002_1465		MT:456:C:T	Affx-79381653	0.039063	-0.041048	NA	0.69765	0.40357	20002_1465
MT:456:C:T	Affx-79381653	0.039063	0.0033989	0.0041505	0.41283	20002_1473		MT:456:C:T	Affx-79381653	0.039063	0.0034027	0.0041511	0.41238	20002_1473		MT:456:C:T	Affx-79381653	0.039063	0.032598	NA	0.67579	0.41104	20002_1473
MT:456:C:T	Affx-79381653	0.039063	-0.00012484	0.0027678	0.96403	2443		MT:456:C:T	Affx-79381653	0.039063	-0.00012107	0.0027687	0.96512	2443		MT:456:C:T	Affx-79381653	0.039063	0.00084591	NA	0.00019749	0.98879	2443
MT:456:C:T	Affx-79381653	0.039063	0.018554	0.012635	0.14199	30650_irnt		MT:456:C:T	Affx-79381653	0.039063	0.018552	0.012635	0.14203	30650_irnt		MT:456:C:T	Affx-79381653	0.039063	0.018552	0.012635	NA	0.14203	30650_irnt
MT:456:C:T	Affx-79381653	0.039063	0.00075637	0.010708	0.94369	30700_irnt		MT:456:C:T	Affx-79381653	0.039063	0.00075079	0.010709	0.94411	30700_irnt		MT:456:C:T	Affx-79381653	0.039063	0.00075079	0.010709	NA	0.94411	30700_irnt
MT:456:C:T	Affx-79381653	0.039063	-0.01165	0.013614	0.39215	30740_irnt		MT:456:C:T	Affx-79381653	0.039063	-0.011644	0.013614	0.3924	30740_irnt		MT:456:C:T	Affx-79381653	0.039063	-0.011644	0.013614	NA	0.3924	30740_irnt
MT:456:C:T	Affx-79381653	0.039063	0.01357	0.012465	0.27632	30760_irnt		MT:456:C:T	Affx-79381653	0.039063	0.013548	0.01247	0.2773	30760_irnt		MT:456:C:T	Affx-79381653	0.039063	0.013548	0.01247	NA	0.2773	30760_irnt
MT:456:C:T	Affx-79381653	0.039063	-0.0022868	0.013015	0.86053	30780_irnt		MT:456:C:T	Affx-79381653	0.039063	-0.0022889	0.013015	0.8604	30780_irnt		MT:456:C:T	Affx-79381653	0.039063	-0.0022889	0.013015	NA	0.8604	30780_irnt
MT:456:C:T	Affx-79381653	0.039063	-0.025285	0.012811	0.048416	30870_irnt		MT:456:C:T	Affx-79381653	0.039063	-0.025261	0.012818	0.048751	30870_irnt		MT:456:C:T	Affx-79381653	0.039063	-0.025261	0.012818	NA	0.048751	30870_irnt
MT:456:C:T	Affx-79381653	0.039063	-0.017873	0.016608	0.28185	3148_irnt		MT:456:C:T	Affx-79381653	0.039063	-0.017878	0.016609	0.28175	3148_irnt		MT:456:C:T	Affx-79381653	0.039063	-0.017878	0.016609	NA	0.28175	3148_irnt
MT:456:C:T	Affx-79381653	0.039063	-0.0043001	0.003593	0.23138	3393		MT:456:C:T	Affx-79381653	0.039063	-0.0043003	0.003593	0.23136	3393		MT:456:C:T	Affx-79381653	0.039063	-0.09337	NA	1.3404	0.24697	3393
MT:456:C:T	Affx-79381653	0.039063	0.010937	0.013101	0.40381	4079_irnt		MT:456:C:T	Affx-79381653	0.039063	0.010939	0.013101	0.40372	4079_irnt		MT:456:C:T	Affx-79381653	0.039063	0.010939	0.013101	NA	0.40372	4079_irnt
MT:456:C:T	Affx-79381653	0.039063	0.017302	0.012405	0.16308	4080_irnt		MT:456:C:T	Affx-79381653	0.039063	0.017308	0.012406	0.16297	4080_irnt		MT:456:C:T	Affx-79381653	0.039063	0.017308	0.012406	NA	0.16297	4080_irnt
MT:456:C:T	Affx-79381653	0.039063	-0.001705	0.0027035	0.52825	C3_SKIN		MT:456:C:T	Affx-79381653	0.039063	-0.0017055	0.0027035	0.52814	C3_SKIN		MT:456:C:T	Affx-79381653	0.039063	-0.037054	NA	0.33916	0.56031	C3_SKIN
MT:456:C:T	Affx-79381653	0.039063	-0.0013642	0.0023049	0.55394	H26		MT:456:C:T	Affx-79381653	0.039063	-0.001364	0.0023049	0.55399	H26		MT:456:C:T	Affx-79381653	0.039063	-0.039785	NA	0.27873	0.59753	H26
MT:456:C:T	Affx-79381653	0.039063	0.0012345	0.0017526	0.48118	I48		MT:456:C:T	Affx-79381653	0.039063	0.001235	0.0017526	0.48102	I48		MT:456:C:T	Affx-79381653	0.039063	0.068899	NA	0.58049	0.44612	I48
MT:456:C:T	Affx-79381653	0.039063	0.0021938	0.0021313	0.30333	I9_CHD		MT:456:C:T	Affx-79381653	0.039063	0.0021955	0.0021316	0.303	I9_CHD		MT:456:C:T	Affx-79381653	0.039063	0.078105	NA	1.1177	0.29042	I9_CHD
MT:456:C:T	Affx-79381653	0.039063	-0.0022506	0.0029727	0.44899	I9_IHD		MT:456:C:T	Affx-79381653	0.039063	-0.0022478	0.0029732	0.44965	I9_IHD		MT:456:C:T	Affx-79381653	0.039063	-0.038493	NA	0.46499	0.4953	I9_IHD
MT:456:C:T	Affx-79381653	0.039063	0.00036718	0.0022684	0.87141	K21		MT:456:C:T	Affx-79381653	0.039063	0.00036793	0.0022684	0.87115	K21		MT:456:C:T	Affx-79381653	0.039063	0.016465	NA	0.049484	0.82396	K21
MT:456:C:T	Affx-79381653	0.039063	0.003723	0.0019668	0.058365	K44		MT:456:C:T	Affx-79381653	0.039063	0.0037236	0.0019668	0.058328	K44		MT:456:C:T	Affx-79381653	0.039063	0.14978	NA	3.5373	0.060002	K44
MT:456:C:T	Affx-79381653	0.039063	-0.0027889	0.002438	0.25266	K57		MT:456:C:T	Affx-79381653	0.039063	-0.0027879	0.002438	0.25283	K57		MT:456:C:T	Affx-79381653	0.039063	-0.082481	NA	1.2798	0.25793	K57
MT:497:C:T	Affx-89025674	0.04812	0.00043156	0.0016553	0.79432	20002_1065		MT:497:C:T	Affx-89025674	0.04812	0.00042097	0.0016555	0.79928	20002_1065		MT:497:C:T	Affx-89025674	0.04812	0.0025078	NA	0.075152	0.78398	20002_1065
MT:497:C:T	Affx-89025674	0.04812	0.00011435	0.00067061	0.8646	20002_1074		MT:497:C:T	Affx-89025674	0.04812	0.00010922	0.0006707	0.87065	20002_1074		MT:497:C:T	Affx-89025674	0.04812	0.0045158	NA	0.040107	0.84127	20002_1074
MT:497:C:T	Affx-89025674	0.04812	0.00062472	0.0010587	0.55514	20002_1465		MT:497:C:T	Affx-89025674	0.04812	0.00062023	0.0010588	0.55801	20002_1465		MT:497:C:T	Affx-89025674	0.04812	0.0088553	NA	0.38419	0.53537	20002_1465
MT:497:C:T	Affx-89025674	0.04812	-0.0020688	0.0012405	0.095375	20002_1473		MT:497:C:T	Affx-89025674	0.04812	-0.002077	0.0012407	0.094107	20002_1473		MT:497:C:T	Affx-89025674	0.04812	-0.020352	NA	2.7259	0.098731	20002_1473
MT:497:C:T	Affx-89025674	0.04812	-0.00085236	0.00082667	0.3025	2443		MT:497:C:T	Affx-89025674	0.04812	-0.00086049	0.00082691	0.29806	2443		MT:497:C:T	Affx-89025674	0.04812	-0.018868	NA	1.0347	0.30906	2443
MT:497:C:T	Affx-89025674	0.04812	0.0011307	0.0037799	0.76483	30650_irnt		MT:497:C:T	Affx-89025674	0.04812	0.001136	0.0037799	0.76377	30650_irnt		MT:497:C:T	Affx-89025674	0.04812	0.001136	0.0037799	NA	0.76377	30650_irnt
MT:497:C:T	Affx-89025674	0.04812	-0.003814	0.0032027	0.23371	30700_irnt		MT:497:C:T	Affx-89025674	0.04812	-0.0037927	0.0032028	0.23635	30700_irnt		MT:497:C:T	Affx-89025674	0.04812	-0.0037927	0.0032028	NA	0.23635	30700_irnt
MT:497:C:T	Affx-89025674	0.04812	0.0057118	0.0041097	0.16457	30740_irnt		MT:497:C:T	Affx-89025674	0.04812	0.0056874	0.0041097	0.1664	30740_irnt		MT:497:C:T	Affx-89025674	0.04812	0.0056874	0.0041097	NA	0.1664	30740_irnt
MT:497:C:T	Affx-89025674	0.04812	0.00064538	0.0037625	0.86381	30760_irnt		MT:497:C:T	Affx-89025674	0.04812	0.00073617	0.0037641	0.84494	30760_irnt		MT:497:C:T	Affx-89025674	0.04812	0.00073617	0.0037641	NA	0.84494	30760_irnt
MT:497:C:T	Affx-89025674	0.04812	-0.00018418	0.0038926	0.96226	30780_irnt		MT:497:C:T	Affx-89025674	0.04812	-0.0001746	0.0038926	0.96422	30780_irnt		MT:497:C:T	Affx-89025674	0.04812	-0.0001746	0.0038926	NA	0.96422	30780_irnt
MT:497:C:T	Affx-89025674	0.04812	0.0039054	0.0038325	0.30819	30870_irnt		MT:497:C:T	Affx-89025674	0.04812	0.0038015	0.0038345	0.3215	30870_irnt		MT:497:C:T	Affx-89025674	0.04812	0.0038015	0.0038345	NA	0.3215	30870_irnt
MT:497:C:T	Affx-89025674	0.04812	-0.0017476	0.0049512	0.72411	3148_irnt		MT:497:C:T	Affx-89025674	0.04812	-0.001758	0.0049514	0.72255	3148_irnt		MT:497:C:T	Affx-89025674	0.04812	-0.001758	0.0049514	NA	0.72255	3148_irnt
MT:497:C:T	Affx-89025674	0.04812	0.0021571	0.0010765	0.045081	3393		MT:497:C:T	Affx-89025674	0.04812	0.0021586	0.0010765	0.044934	3393		MT:497:C:T	Affx-89025674	0.04812	0.045801	NA	4.0222	0.044906	3393
MT:497:C:T	Affx-89025674	0.04812	0.0051597	0.0039281	0.189	4079_irnt		MT:497:C:T	Affx-89025674	0.04812	0.0051622	0.0039282	0.18879	4079_irnt		MT:497:C:T	Affx-89025674	0.04812	0.0051622	0.0039282	NA	0.18879	4079_irnt
MT:497:C:T	Affx-89025674	0.04812	0.0021473	0.0037195	0.56373	4080_irnt		MT:497:C:T	Affx-89025674	0.04812	0.002145	0.0037198	0.56417	4080_irnt		MT:497:C:T	Affx-89025674	0.04812	0.002145	0.0037198	NA	0.56417	4080_irnt
MT:497:C:T	Affx-89025674	0.04812	0.00059115	0.00080797	0.46438	C3_SKIN		MT:497:C:T	Affx-89025674	0.04812	0.00059225	0.00080797	0.46355	C3_SKIN		MT:497:C:T	Affx-89025674	0.04812	0.013684	NA	0.53779	0.46335	C3_SKIN
MT:497:C:T	Affx-89025674	0.04812	-0.00039527	0.00068886	0.5661	H26		MT:497:C:T	Affx-89025674	0.04812	-0.00039566	0.00068886	0.56572	H26		MT:497:C:T	Affx-89025674	0.04812	-0.013129	NA	0.3479	0.55531	H26
MT:497:C:T	Affx-89025674	0.04812	0.00050593	0.00052378	0.33408	I48		MT:497:C:T	Affx-89025674	0.04812	0.00050495	0.00052378	0.33502	I48		MT:497:C:T	Affx-89025674	0.04812	0.028065	NA	0.97068	0.32451	I48
MT:497:C:T	Affx-89025674	0.04812	0.00053276	0.00063697	0.40293	I9_CHD		MT:497:C:T	Affx-89025674	0.04812	0.00052885	0.00063705	0.40645	I9_CHD		MT:497:C:T	Affx-89025674	0.04812	0.019903	NA	0.71745	0.39698	I9_CHD
MT:497:C:T	Affx-89025674	0.04812	0.00050838	0.00088843	0.56717	I9_IHD		MT:497:C:T	Affx-89025674	0.04812	0.00050061	0.00088859	0.57318	I9_IHD		MT:497:C:T	Affx-89025674	0.04812	0.0099996	NA	0.34767	0.55544	I9_IHD
MT:497:C:T	Affx-89025674	0.04812	0.00062585	0.00067794	0.35592	K21		MT:497:C:T	Affx-89025674	0.04812	0.00062426	0.00067795	0.35715	K21		MT:497:C:T	Affx-89025674	0.04812	0.020624	NA	0.87343	0.35001	K21
MT:497:C:T	Affx-89025674	0.04812	0.00078834	0.00058779	0.17986	K44		MT:497:C:T	Affx-89025674	0.04812	0.00078705	0.0005878	0.18058	K44		MT:497:C:T	Affx-89025674	0.04812	0.034295	NA	1.8412	0.1748	K44
MT:497:C:T	Affx-89025674	0.04812	-0.00049963	0.00072862	0.49289	K57		MT:497:C:T	Affx-89025674	0.04812	-0.00050172	0.00072864	0.4911	K57		MT:497:C:T	Affx-89025674	0.04812	-0.014391	NA	0.47066	0.49268	K57
MT:709:G:A	Affx-34462196	0.14655	0.0018497	0.0010046	0.065595	20002_1065		MT:709:G:A	Affx-34462196	0.14655	0.0018515	0.0010047	0.065351	20002_1065		MT:709:G:A	Affx-34462196	0.14655	0.010247	NA	3.4175	0.06451	20002_1065
MT:709:G:A	Affx-34462196	0.14655	0.00072807	0.00040699	0.073625	20002_1074		MT:709:G:A	Affx-34462196	0.14655	0.00073527	0.00040704	0.070857	20002_1074		MT:709:G:A	Affx-34462196	0.14655	0.024761	NA	3.3221	0.068353	20002_1074
MT:709:G:A	Affx-34462196	0.14655	-0.00044478	0.00064252	0.48878	20002_1465		MT:709:G:A	Affx-34462196	0.14655	-0.00044791	0.00064255	0.48576	20002_1465		MT:709:G:A	Affx-34462196	0.14655	-0.0058464	NA	0.45073	0.50199	20002_1465
MT:709:G:A	Affx-34462196	0.14655	0.00085599	0.00075284	0.25553	20002_1473		MT:709:G:A	Affx-34462196	0.14655	0.00085035	0.00075295	0.25875	20002_1473		MT:709:G:A	Affx-34462196	0.14655	0.0086242	NA	1.3613	0.24331	20002_1473
MT:709:G:A	Affx-34462196	0.14655	-3.1255e-05	0.00050172	0.95033	2443		MT:709:G:A	Affx-34462196	0.14655	-2.5841e-05	0.00050186	0.95893	2443		MT:709:G:A	Affx-34462196	0.14655	-0.00039272	NA	0.0012435	0.97187	2443
MT:709:G:A	Affx-34462196	0.14655	0.0018027	0.0022938	0.43192	30650_irnt		MT:709:G:A	Affx-34462196	0.14655	0.0018084	0.0022938	0.43046	30650_irnt		MT:709:G:A	Affx-34462196	0.14655	0.0018084	0.0022938	NA	0.43046	30650_irnt
MT:709:G:A	Affx-34462196	0.14655	-0.0037694	0.0019435	0.052442	30700_irnt		MT:709:G:A	Affx-34462196	0.14655	-0.0037763	0.0019436	0.052019	30700_irnt		MT:709:G:A	Affx-34462196	0.14655	-0.0037763	0.0019436	NA	0.052019	30700_irnt
MT:709:G:A	Affx-34462196	0.14655	0.0061061	0.0024933	0.014327	30740_irnt		MT:709:G:A	Affx-34462196	0.14655	0.0061047	0.0024934	0.01435	30740_irnt		MT:709:G:A	Affx-34462196	0.14655	0.0061047	0.0024934	NA	0.01435	30740_irnt
MT:709:G:A	Affx-34462196	0.14655	-0.0012144	0.002282	0.59463	30760_irnt		MT:709:G:A	Affx-34462196	0.14655	-0.0012081	0.002283	0.59671	30760_irnt		MT:709:G:A	Affx-34462196	0.14655	-0.0012081	0.002283	NA	0.59671	30760_irnt
MT:709:G:A	Affx-34462196	0.14655	-0.0010614	0.0023614	0.6531	30780_irnt		MT:709:G:A	Affx-34462196	0.14655	-0.0010716	0.0023614	0.64997	30780_irnt		MT:709:G:A	Affx-34462196	0.14655	-0.0010716	0.0023614	NA	0.64997	30780_irnt
MT:709:G:A	Affx-34462196	0.14655	0.0054029	0.0023255	0.020164	30870_irnt		MT:709:G:A	Affx-34462196	0.14655	0.0054139	0.0023267	0.019977	30870_irnt		MT:709:G:A	Affx-34462196	0.14655	0.0054139	0.0023267	NA	0.019977	30870_irnt
MT:709:G:A	Affx-34462196	0.14655	0.0017591	0.003015	0.55958	3148_irnt		MT:709:G:A	Affx-34462196	0.14655	0.0017475	0.003015	0.56218	3148_irnt		MT:709:G:A	Affx-34462196	0.14655	0.0017475	0.003015	NA	0.56218	3148_irnt
MT:709:G:A	Affx-34462196	0.14655	0.0011654	0.00065289	0.074265	3393		MT:709:G:A	Affx-34462196	0.14655	0.0011658	0.00065289	0.074161	3393		MT:709:G:A	Affx-34462196	0.14655	0.025276	NA	3.2743	0.070372	3393
MT:709:G:A	Affx-34462196	0.14655	0.0018581	0.0023836	0.43566	4079_irnt		MT:709:G:A	Affx-34462196	0.14655	0.0018258	0.0023836	0.44367	4079_irnt		MT:709:G:A	Affx-34462196	0.14655	0.0018258	0.0023836	NA	0.44367	4079_irnt
MT:709:G:A	Affx-34462196	0.14655	0.0046372	0.002257	0.039919	4080_irnt		MT:709:G:A	Affx-34462196	0.14655	0.0046028	0.0022571	0.041427	4080_irnt		MT:709:G:A	Affx-34462196	0.14655	0.0046028	0.0022571	NA	0.041427	4080_irnt
MT:709:G:A	Affx-34462196	0.14655	6.1608e-05	0.00049037	0.90002	C3_SKIN		MT:709:G:A	Affx-34462196	0.14655	6.1937e-05	0.00049036	0.89949	C3_SKIN		MT:709:G:A	Affx-34462196	0.14655	0.001439	NA	0.015981	0.8994	C3_SKIN
MT:709:G:A	Affx-34462196	0.14655	0.00023349	0.00041808	0.57651	H26		MT:709:G:A	Affx-34462196	0.14655	0.0002332	0.00041807	0.57698	H26		MT:709:G:A	Affx-34462196	0.14655	0.0076286	NA	0.32739	0.5672	H26
MT:709:G:A	Affx-34462196	0.14655	-0.00028892	0.00031789	0.36342	I48		MT:709:G:A	Affx-34462196	0.14655	-0.00028961	0.00031789	0.36228	I48		MT:709:G:A	Affx-34462196	0.14655	-0.015867	NA	0.8058	0.36937	I48
MT:709:G:A	Affx-34462196	0.14655	-0.00014066	0.00038658	0.71598	I9_CHD		MT:709:G:A	Affx-34462196	0.14655	-0.00014316	0.00038663	0.71119	I9_CHD		MT:709:G:A	Affx-34462196	0.14655	-0.0050377	NA	0.1212	0.72774	I9_CHD
MT:709:G:A	Affx-34462196	0.14655	-2.456e-05	0.0005392	0.96367	I9_IHD		MT:709:G:A	Affx-34462196	0.14655	-1.9066e-05	0.00053929	0.9718	I9_IHD		MT:709:G:A	Affx-34462196	0.14655	-0.00012621	NA	0.00014872	0.99027	I9_IHD
MT:709:G:A	Affx-34462196	0.14655	-9.3733e-05	0.00041145	0.81979	K21		MT:709:G:A	Affx-34462196	0.14655	-9.4909e-05	0.00041145	0.81757	K21		MT:709:G:A	Affx-34462196	0.14655	-0.0028808	NA	0.044924	0.83214	K21
MT:709:G:A	Affx-34462196	0.14655	0.00020235	0.00035674	0.57057	K44		MT:709:G:A	Affx-34462196	0.14655	0.00020146	0.00035674	0.57227	K44		MT:709:G:A	Affx-34462196	0.14655	0.0092532	NA	0.35096	0.55357	K44
MT:709:G:A	Affx-34462196	0.14655	0.00079028	0.00044221	0.073919	K57		MT:709:G:A	Affx-34462196	0.14655	0.00078884	0.00044222	0.07445	K57		MT:709:G:A	Affx-34462196	0.14655	0.022567	NA	3.2463	0.071586	K57
MT:750:A:G	Affx-79381656	0.98292	0.0068994	0.0029292	0.018503	20002_1065		MT:750:A:G	Affx-79381656	0.98292	0.0069042	0.0029295	0.018435	20002_1065		MT:750:A:G	Affx-79381656	0.98292	0.038629	NA	5.5907	0.018056	20002_1065
MT:750:A:G	Affx-79381656	0.98292	0.0019875	0.0011867	0.093953	20002_1074		MT:750:A:G	Affx-79381656	0.98292	0.0019905	0.0011868	0.093507	20002_1074		MT:750:A:G	Affx-79381656	0.98292	0.068606	NA	2.7323	0.09834	20002_1074
MT:750:A:G	Affx-79381656	0.98292	-0.00060218	0.0018734	0.74788	20002_1465		MT:750:A:G	Affx-79381656	0.98292	-0.0006005	0.0018735	0.74858	20002_1465		MT:750:A:G	Affx-79381656	0.98292	-0.0080157	NA	0.10104	0.75059	20002_1465
MT:750:A:G	Affx-79381656	0.98292	0.003506	0.0021951	0.11022	20002_1473		MT:750:A:G	Affx-79381656	0.98292	0.0035091	0.0021954	0.10996	20002_1473		MT:750:A:G	Affx-79381656	0.98292	0.03504	NA	2.5676	0.10907	20002_1473
MT:750:A:G	Affx-79381656	0.98292	0.0019788	0.0014629	0.17617	2443		MT:750:A:G	Affx-79381656	0.98292	0.0019834	0.0014634	0.17531	2443		MT:750:A:G	Affx-79381656	0.98292	0.044504	NA	1.7971	0.18007	2443
MT:750:A:G	Affx-79381656	0.98292	0.0036947	0.0066941	0.581	30650_irnt		MT:750:A:G	Affx-79381656	0.98292	0.0036947	0.0066941	0.58099	30650_irnt		MT:750:A:G	Affx-79381656	0.98292	0.0036947	0.0066941	NA	0.58099	30650_irnt
MT:750:A:G	Affx-79381656	0.98292	-0.017255	0.0056704	0.0023431	30700_irnt		MT:750:A:G	Affx-79381656	0.98292	-0.017259	0.0056706	0.0023374	30700_irnt		MT:750:A:G	Affx-79381656	0.98292	-0.017259	0.0056706	NA	0.0023374	30700_irnt
MT:750:A:G	Affx-79381656	0.98292	0.0070361	0.0072755	0.3335	30740_irnt		MT:750:A:G	Affx-79381656	0.98292	0.0070404	0.0072756	0.33321	30740_irnt		MT:750:A:G	Affx-79381656	0.98292	0.0070404	0.0072756	NA	0.33321	30740_irnt
MT:750:A:G	Affx-79381656	0.98292	-0.0048054	0.0066582	0.47046	30760_irnt		MT:750:A:G	Affx-79381656	0.98292	-0.0048224	0.0066611	0.46908	30760_irnt		MT:750:A:G	Affx-79381656	0.98292	-0.0048224	0.0066611	NA	0.46908	30760_irnt
MT:750:A:G	Affx-79381656	0.98292	0.0066136	0.0068926	0.3373	30780_irnt		MT:750:A:G	Affx-79381656	0.98292	0.0066099	0.0068926	0.33757	30780_irnt		MT:750:A:G	Affx-79381656	0.98292	0.0066099	0.0068926	NA	0.33757	30780_irnt
MT:750:A:G	Affx-79381656	0.98292	0.0063872	0.0067847	0.34649	30870_irnt		MT:750:A:G	Affx-79381656	0.98292	0.0064097	0.0067882	0.34505	30870_irnt		MT:750:A:G	Affx-79381656	0.98292	0.0064097	0.0067882	NA	0.34505	30870_irnt
MT:750:A:G	Affx-79381656	0.98292	-0.012218	0.0087573	0.16295	3148_irnt		MT:750:A:G	Affx-79381656	0.98292	-0.012224	0.0087576	0.16277	3148_irnt		MT:750:A:G	Affx-79381656	0.98292	-0.012224	0.0087576	NA	0.16277	3148_irnt
MT:750:A:G	Affx-79381656	0.98292	-0.0017263	0.0019008	0.36378	3393		MT:750:A:G	Affx-79381656	0.98292	-0.001727	0.0019008	0.36358	3393		MT:750:A:G	Affx-79381656	0.98292	-0.03702	NA	0.8512	0.35621	3393
MT:750:A:G	Affx-79381656	0.98292	0.0074997	0.0069358	0.27956	4079_irnt		MT:750:A:G	Affx-79381656	0.98292	0.0074982	0.0069359	0.27967	4079_irnt		MT:750:A:G	Affx-79381656	0.98292	0.0074982	0.0069359	NA	0.27967	4079_irnt
MT:750:A:G	Affx-79381656	0.98292	0.011966	0.0065674	0.068458	4080_irnt		MT:750:A:G	Affx-79381656	0.98292	0.011971	0.0065679	0.068358	4080_irnt		MT:750:A:G	Affx-79381656	0.98292	0.011971	0.0065679	NA	0.068358	4080_irnt
MT:750:A:G	Affx-79381656	0.98292	-0.0012368	0.0014297	0.38698	C3_SKIN		MT:750:A:G	Affx-79381656	0.98292	-0.0012373	0.0014297	0.3868	C3_SKIN		MT:750:A:G	Affx-79381656	0.98292	-0.029505	NA	0.81781	0.36582	C3_SKIN
MT:750:A:G	Affx-79381656	0.98292	-6.7846e-05	0.0012189	0.95561	H26		MT:750:A:G	Affx-79381656	0.98292	-6.7714e-05	0.0012189	0.9557	H26		MT:750:A:G	Affx-79381656	0.98292	-0.0053505	NA	0.019084	0.89013	H26
MT:750:A:G	Affx-79381656	0.98292	-9.8983e-07	0.00092681	0.99915	I48		MT:750:A:G	Affx-79381656	0.98292	-6.2748e-07	0.00092682	0.99946	I48		MT:750:A:G	Affx-79381656	0.98292	-0.0031258	NA	0.0037793	0.95098	I48
MT:750:A:G	Affx-79381656	0.98292	0.00054155	0.0011271	0.63089	I9_CHD		MT:750:A:G	Affx-79381656	0.98292	0.00054304	0.0011272	0.62999	I9_CHD		MT:750:A:G	Affx-79381656	0.98292	0.017898	NA	0.17762	0.67343	I9_CHD
MT:750:A:G	Affx-79381656	0.98292	0.0031384	0.001572	0.045893	I9_IHD		MT:750:A:G	Affx-79381656	0.98292	0.0031423	0.0015723	0.045659	I9_IHD		MT:750:A:G	Affx-79381656	0.98292	0.061299	NA	3.8916	0.048529	I9_IHD
MT:750:A:G	Affx-79381656	0.98292	-0.002878	0.0011996	0.016433	K21		MT:750:A:G	Affx-79381656	0.98292	-0.0028774	0.0011996	0.016456	K21		MT:750:A:G	Affx-79381656	0.98292	-0.088611	NA	5.6	0.017961	K21
MT:750:A:G	Affx-79381656	0.98292	0.00024908	0.0010401	0.81073	K44		MT:750:A:G	Affx-79381656	0.98292	0.00024956	0.0010401	0.81038	K44		MT:750:A:G	Affx-79381656	0.98292	0.0085594	NA	0.034958	0.85168	K44
MT:750:A:G	Affx-79381656	0.98292	-0.0011512	0.0012893	0.37191	K57		MT:750:A:G	Affx-79381656	0.98292	-0.0011504	0.0012893	0.37225	K57		MT:750:A:G	Affx-79381656	0.98292	-0.033513	NA	0.86233	0.35309	K57
MT:769:G:A	Affx-34462230	0.0021694	0.0037488	0.0076128	0.62241	20002_1065		MT:769:G:A	Affx-34462230	0.0021694	0.0036736	0.0076136	0.62945	20002_1065		MT:769:G:A	Affx-34462230	0.0021694	0.020839	NA	0.24246	0.62243	20002_1065
MT:769:G:A	Affx-34462230	0.0021694	0.0051495	0.0030841	0.094976	20002_1074		MT:769:G:A	Affx-34462230	0.0021694	0.0051205	0.0030845	0.096897	20002_1074		MT:769:G:A	Affx-34462230	0.0021694	0.16609	NA	2.9212	0.087425	20002_1074
MT:769:G:A	Affx-34462230	0.0021694	-0.0062122	0.0048689	0.20199	20002_1465		MT:769:G:A	Affx-34462230	0.0021694	-0.0062482	0.0048692	0.19942	20002_1465		MT:769:G:A	Affx-34462230	0.0021694	-0.092827	NA	1.7528	0.18553	20002_1465
MT:769:G:A	Affx-34462230	0.0021694	0.0056063	0.0057049	0.32574	20002_1473		MT:769:G:A	Affx-34462230	0.0021694	0.00554	0.0057058	0.33157	20002_1473		MT:769:G:A	Affx-34462230	0.0021694	0.054937	NA	0.97906	0.32243	20002_1473
MT:769:G:A	Affx-34462230	0.0021694	0.0076494	0.0038044	0.044361	2443		MT:769:G:A	Affx-34462230	0.0021694	0.0075823	0.0038056	0.046325	2443		MT:769:G:A	Affx-34462230	0.0021694	0.15703	NA	4.0226	0.044896	2443
MT:769:G:A	Affx-34462230	0.0021694	-0.018198	0.017452	0.29707	30650_irnt		MT:769:G:A	Affx-34462230	0.0021694	-0.018175	0.017452	0.29767	30650_irnt		MT:769:G:A	Affx-34462230	0.0021694	-0.018175	0.017452	NA	0.29767	30650_irnt
MT:769:G:A	Affx-34462230	0.0021694	-0.034355	0.014781	0.020109	30700_irnt		MT:769:G:A	Affx-34462230	0.0021694	-0.034278	0.014781	0.020393	30700_irnt		MT:769:G:A	Affx-34462230	0.0021694	-0.034278	0.014781	NA	0.020393	30700_irnt
MT:769:G:A	Affx-34462230	0.0021694	0.016548	0.018936	0.38218	30740_irnt		MT:769:G:A	Affx-34462230	0.0021694	0.016437	0.018936	0.38536	30740_irnt		MT:769:G:A	Affx-34462230	0.0021694	0.016437	0.018936	NA	0.38536	30740_irnt
MT:769:G:A	Affx-34462230	0.0021694	-0.0184	0.017338	0.28858	30760_irnt		MT:769:G:A	Affx-34462230	0.0021694	-0.017967	0.017346	0.3003	30760_irnt		MT:769:G:A	Affx-34462230	0.0021694	-0.017967	0.017346	NA	0.3003	30760_irnt
MT:769:G:A	Affx-34462230	0.0021694	-0.017555	0.017984	0.329	30780_irnt		MT:769:G:A	Affx-34462230	0.0021694	-0.017525	0.017984	0.32981	30780_irnt		MT:769:G:A	Affx-34462230	0.0021694	-0.017525	0.017984	NA	0.32981	30780_irnt
MT:769:G:A	Affx-34462230	0.0021694	0.014148	0.017707	0.42428	30870_irnt		MT:769:G:A	Affx-34462230	0.0021694	0.0138	0.017716	0.43603	30870_irnt		MT:769:G:A	Affx-34462230	0.0021694	0.0138	0.017716	NA	0.43603	30870_irnt
MT:769:G:A	Affx-34462230	0.0021694	0.023656	0.022316	0.28913	3148_irnt		MT:769:G:A	Affx-34462230	0.0021694	0.023812	0.022316	0.28596	3148_irnt		MT:769:G:A	Affx-34462230	0.0021694	0.023812	0.022316	NA	0.28596	3148_irnt
MT:769:G:A	Affx-34462230	0.0021694	-0.00090341	0.0048912	0.85346	3393		MT:769:G:A	Affx-34462230	0.0021694	-0.00090818	0.0048912	0.8527	3393		MT:769:G:A	Affx-34462230	0.0021694	-0.012424	NA	0.013558	0.9073	3393
MT:769:G:A	Affx-34462230	0.0021694	-0.0095849	0.017935	0.59305	4079_irnt		MT:769:G:A	Affx-34462230	0.0021694	-0.009623	0.017936	0.59159	4079_irnt		MT:769:G:A	Affx-34462230	0.0021694	-0.009623	0.017936	NA	0.59159	4079_irnt
MT:769:G:A	Affx-34462230	0.0021694	-0.013083	0.016983	0.4411	4080_irnt		MT:769:G:A	Affx-34462230	0.0021694	-0.013183	0.016984	0.43764	4080_irnt		MT:769:G:A	Affx-34462230	0.0021694	-0.013183	0.016984	NA	0.43764	4080_irnt
MT:769:G:A	Affx-34462230	0.0021694	0.0011156	0.003716	0.76402	C3_SKIN		MT:769:G:A	Affx-34462230	0.0021694	0.0011238	0.003716	0.76233	C3_SKIN		MT:769:G:A	Affx-34462230	0.0021694	0.033206	NA	0.14798	0.70047	C3_SKIN
MT:769:G:A	Affx-34462230	0.0021694	-0.00061789	0.0031682	0.84537	H26		MT:769:G:A	Affx-34462230	0.0021694	-0.00062111	0.0031682	0.84457	H26		MT:769:G:A	Affx-34462230	0.0021694	-0.0080331	NA	0.005994	0.93829	H26
MT:769:G:A	Affx-34462230	0.0021694	0.0046488	0.0029295	0.11255	I9_CHD		MT:769:G:A	Affx-34462230	0.0021694	0.0046176	0.0029299	0.11502	I9_CHD		MT:769:G:A	Affx-34462230	0.0021694	0.1655	NA	2.6525	0.10339	I9_CHD
MT:769:G:A	Affx-34462230	0.0021694	0.0060605	0.004086	0.13802	I9_IHD		MT:769:G:A	Affx-34462230	0.0021694	0.0060103	0.0040868	0.14138	I9_IHD		MT:769:G:A	Affx-34462230	0.0021694	0.11466	NA	2.2963	0.12968	I9_IHD
MT:769:G:A	Affx-34462230	0.0021694	-0.00058977	0.003118	0.84997	K21		MT:769:G:A	Affx-34462230	0.0021694	-0.0006029	0.003118	0.84668	K21		MT:769:G:A	Affx-34462230	0.0021694	-0.010965	NA	0.010986	0.91652	K21
MT:769:G:A	Affx-34462230	0.0021694	0.0062933	0.0033511	0.060381	K57		MT:769:G:A	Affx-34462230	0.0021694	0.0062766	0.0033511	0.061075	K57		MT:769:G:A	Affx-34462230	0.0021694	0.16813	NA	3.5986	0.05783	K57
MT:827:A:G	Affx-89025774	0.0018754	0.014077	0.0081881	0.085572	20002_1065		MT:827:A:G	Affx-89025774	0.0018754	0.014244	0.008189	0.081974	20002_1065		MT:827:A:G	Affx-89025774	0.0018754	0.07786	NA	3.0504	0.080716	20002_1065
MT:827:A:G	Affx-89025774	0.0018754	0.0047771	0.0033172	0.14983	20002_1074		MT:827:A:G	Affx-89025774	0.0018754	0.0048389	0.0033176	0.14469	20002_1074		MT:827:A:G	Affx-89025774	0.0018754	0.15871	NA	2.3402	0.12607	20002_1074
MT:827:A:G	Affx-89025774	0.0018754	0.0017417	0.0052369	0.73946	20002_1465		MT:827:A:G	Affx-89025774	0.0018754	0.0018222	0.0052372	0.72789	20002_1465		MT:827:A:G	Affx-89025774	0.0018754	0.026044	NA	0.14209	0.70621	20002_1465
MT:827:A:G	Affx-89025774	0.0018754	0.0059856	0.0061361	0.32933	20002_1473		MT:827:A:G	Affx-89025774	0.0018754	0.006134	0.006137	0.31755	20002_1473		MT:827:A:G	Affx-89025774	0.0018754	0.06118	NA	1.0762	0.29956	20002_1473
MT:827:A:G	Affx-89025774	0.0018754	0.0032796	0.0040902	0.42265	2443		MT:827:A:G	Affx-89025774	0.0018754	0.003401	0.0040914	0.40583	2443		MT:827:A:G	Affx-89025774	0.0018754	0.078444	NA	0.79723	0.37192	2443
MT:827:A:G	Affx-89025774	0.0018754	-0.0012581	0.018831	0.94674	30650_irnt		MT:827:A:G	Affx-89025774	0.0018754	-0.0013148	0.018831	0.94434	30650_irnt		MT:827:A:G	Affx-89025774	0.0018754	-0.0013148	0.018831	NA	0.94434	30650_irnt
MT:827:A:G	Affx-89025774	0.0018754	0.0082145	0.015957	0.60669	30700_irnt		MT:827:A:G	Affx-89025774	0.0018754	0.0080544	0.015957	0.61373	30700_irnt		MT:827:A:G	Affx-89025774	0.0018754	0.0080544	0.015957	NA	0.61373	30700_irnt
MT:827:A:G	Affx-89025774	0.0018754	0.057884	0.020435	0.004618	30740_irnt		MT:827:A:G	Affx-89025774	0.0018754	0.057982	0.020436	0.0045505	30740_irnt		MT:827:A:G	Affx-89025774	0.0018754	0.057982	0.020436	NA	0.0045505	30740_irnt
MT:827:A:G	Affx-89025774	0.0018754	-0.032474	0.018712	0.082654	30760_irnt		MT:827:A:G	Affx-89025774	0.0018754	-0.032852	0.01872	0.079274	30760_irnt		MT:827:A:G	Affx-89025774	0.0018754	-0.032852	0.01872	NA	0.079274	30760_irnt
MT:827:A:G	Affx-89025774	0.0018754	-0.00028301	0.019421	0.98837	30780_irnt		MT:827:A:G	Affx-89025774	0.0018754	-0.00034595	0.019421	0.98579	30780_irnt		MT:827:A:G	Affx-89025774	0.0018754	-0.00034595	0.019421	NA	0.98579	30780_irnt
MT:827:A:G	Affx-89025774	0.0018754	0.036698	0.01909	0.054555	30870_irnt		MT:827:A:G	Affx-89025774	0.0018754	0.037447	0.0191	0.049928	30870_irnt		MT:827:A:G	Affx-89025774	0.0018754	0.037447	0.0191	NA	0.049928	30870_irnt
MT:827:A:G	Affx-89025774	0.0018754	0.0033809	0.024503	0.89026	3148_irnt		MT:827:A:G	Affx-89025774	0.0018754	0.0034505	0.024504	0.88802	3148_irnt		MT:827:A:G	Affx-89025774	0.0018754	0.0034505	0.024504	NA	0.88802	3148_irnt
MT:827:A:G	Affx-89025774	0.0018754	-0.0069222	0.0052941	0.19103	3393		MT:827:A:G	Affx-89025774	0.0018754	-0.0069547	0.0052941	0.18895	3393		MT:827:A:G	Affx-89025774	0.0018754	-0.15638	NA	1.5729	0.20978	3393
MT:827:A:G	Affx-89025774	0.0018754	-0.0013299	0.019227	0.94486	4079_irnt		MT:827:A:G	Affx-89025774	0.0018754	-0.001178	0.019228	0.95115	4079_irnt		MT:827:A:G	Affx-89025774	0.0018754	-0.001178	0.019228	NA	0.95115	4079_irnt
MT:827:A:G	Affx-89025774	0.0018754	-0.0052706	0.018206	0.7722	4080_irnt		MT:827:A:G	Affx-89025774	0.0018754	-0.0049001	0.018207	0.78783	4080_irnt		MT:827:A:G	Affx-89025774	0.0018754	-0.0049001	0.018207	NA	0.78783	4080_irnt
MT:827:A:G	Affx-89025774	0.0018754	-0.0020802	0.0039968	0.60274	C3_SKIN		MT:827:A:G	Affx-89025774	0.0018754	-0.0020985	0.0039968	0.59956	C3_SKIN		MT:827:A:G	Affx-89025774	0.0018754	-0.04391	NA	0.20584	0.65005	C3_SKIN
MT:827:A:G	Affx-89025774	0.0018754	-0.00065003	0.0034076	0.84872	H26		MT:827:A:G	Affx-89025774	0.0018754	-0.00064273	0.0034076	0.8504	H26		MT:827:A:G	Affx-89025774	0.0018754	-0.0090734	NA	0.0067104	0.93471	H26
MT:827:A:G	Affx-89025774	0.0018754	0.0094952	0.0043948	0.03073	I9_IHD		MT:827:A:G	Affx-89025774	0.0018754	0.0096046	0.0043956	0.028886	I9_IHD		MT:827:A:G	Affx-89025774	0.0018754	0.17366	NA	4.8669	0.027377	I9_IHD
MT:827:A:G	Affx-89025774	0.0018754	0.011638	0.0033535	0.00052005	K21		MT:827:A:G	Affx-89025774	0.0018754	0.011667	0.0033536	0.00050331	K21		MT:827:A:G	Affx-89025774	0.0018754	0.297	NA	10.474	0.0012106	K21
MT:827:A:G	Affx-89025774	0.0018754	0.0079038	0.0036043	0.028316	K57		MT:827:A:G	Affx-89025774	0.0018754	0.0079414	0.0036044	0.027578	K57		MT:827:A:G	Affx-89025774	0.0018754	0.20026	NA	4.7267	0.029698	K57
MT:980:T:C	Affx-91439598	0.0013768	0.0096679	0.010122	0.33949	20002_1065		MT:980:T:C	Affx-91439598	0.0013768	0.0096758	0.010123	0.33914	20002_1065		MT:980:T:C	Affx-91439598	0.0013768	0.05454	NA	0.96295	0.32644	20002_1065
MT:980:T:C	Affx-91439598	0.0013768	0.0019577	0.0064734	0.76233	20002_1465		MT:980:T:C	Affx-91439598	0.0013768	0.0019621	0.0064738	0.76183	20002_1465		MT:980:T:C	Affx-91439598	0.0013768	0.035347	NA	0.16081	0.68842	20002_1465
MT:980:T:C	Affx-91439598	0.0013768	0.01908	0.0075848	0.011886	20002_1473		MT:980:T:C	Affx-91439598	0.0013768	0.019088	0.007586	0.011863	20002_1473		MT:980:T:C	Affx-91439598	0.0013768	0.17657	NA	6.3391	0.01181	20002_1473
MT:980:T:C	Affx-91439598	0.0013768	0.00017762	0.0050772	0.97209	2443		MT:980:T:C	Affx-91439598	0.0013768	0.00018268	0.0050787	0.97131	2443		MT:980:T:C	Affx-91439598	0.0013768	0.015816	NA	0.019719	0.88832	2443
MT:980:T:C	Affx-91439598	0.0013768	-0.004412	0.023053	0.84823	30650_irnt		MT:980:T:C	Affx-91439598	0.0013768	-0.0044165	0.023053	0.84807	30650_irnt		MT:980:T:C	Affx-91439598	0.0013768	-0.0044165	0.023053	NA	0.84807	30650_irnt
MT:980:T:C	Affx-91439598	0.0013768	-0.019043	0.019565	0.33038	30700_irnt		MT:980:T:C	Affx-91439598	0.0013768	-0.019052	0.019565	0.33019	30700_irnt		MT:980:T:C	Affx-91439598	0.0013768	-0.019052	0.019565	NA	0.33019	30700_irnt
MT:980:T:C	Affx-91439598	0.0013768	-0.017471	0.025201	0.48813	30740_irnt		MT:980:T:C	Affx-91439598	0.0013768	-0.017459	0.025202	0.48846	30740_irnt		MT:980:T:C	Affx-91439598	0.0013768	-0.017459	0.025202	NA	0.48846	30740_irnt
MT:980:T:C	Affx-91439598	0.0013768	-0.0049598	0.023075	0.82981	30760_irnt		MT:980:T:C	Affx-91439598	0.0013768	-0.0050097	0.023085	0.8282	30760_irnt		MT:980:T:C	Affx-91439598	0.0013768	-0.0050097	0.023085	NA	0.8282	30760_irnt
MT:980:T:C	Affx-91439598	0.0013768	-0.033624	0.023784	0.15744	30780_irnt		MT:980:T:C	Affx-91439598	0.0013768	-0.033626	0.023784	0.15742	30780_irnt		MT:980:T:C	Affx-91439598	0.0013768	-0.033626	0.023784	NA	0.15742	30780_irnt
MT:980:T:C	Affx-91439598	0.0013768	-0.0079296	0.023406	0.73478	30870_irnt		MT:980:T:C	Affx-91439598	0.0013768	-0.0078918	0.023419	0.73613	30870_irnt		MT:980:T:C	Affx-91439598	0.0013768	-0.0078918	0.023419	NA	0.73613	30870_irnt
MT:980:T:C	Affx-91439598	0.0013768	0.028814	0.029343	0.32611	3148_irnt		MT:980:T:C	Affx-91439598	0.0013768	0.028801	0.029344	0.32634	3148_irnt		MT:980:T:C	Affx-91439598	0.0013768	0.028801	0.029344	NA	0.32634	3148_irnt
MT:980:T:C	Affx-91439598	0.0013768	-0.021761	0.02388	0.36216	4079_irnt		MT:980:T:C	Affx-91439598	0.0013768	-0.02175	0.02388	0.3624	4079_irnt		MT:980:T:C	Affx-91439598	0.0013768	-0.02175	0.02388	NA	0.3624	4079_irnt
MT:980:T:C	Affx-91439598	0.0013768	-0.011144	0.022612	0.62211	4080_irnt		MT:980:T:C	Affx-91439598	0.0013768	-0.011127	0.022613	0.62269	4080_irnt		MT:980:T:C	Affx-91439598	0.0013768	-0.011127	0.022613	NA	0.62269	4080_irnt
MT:980:T:C	Affx-91439598	0.0013768	0.00083964	0.0049406	0.86505	C3_SKIN		MT:980:T:C	Affx-91439598	0.0013768	0.00083874	0.0049406	0.86519	C3_SKIN		MT:980:T:C	Affx-91439598	0.0013768	0.031784	NA	0.075959	0.78285	C3_SKIN
MT:980:T:C	Affx-91439598	0.0013768	0.0014788	0.0054325	0.78546	I9_IHD		MT:980:T:C	Affx-91439598	0.0013768	0.0014832	0.0054335	0.78487	I9_IHD		MT:980:T:C	Affx-91439598	0.0013768	0.037372	NA	0.12848	0.72001	I9_IHD
MT:1018:G:A	Affx-89025772	0.0019961	0.0037617	0.0079381	0.63558	20002_1065		MT:1018:G:A	Affx-89025772	0.0019961	0.0038407	0.007939	0.62855	20002_1065		MT:1018:G:A	Affx-89025772	0.0019961	0.022142	NA	0.25335	0.61473	20002_1065
MT:1018:G:A	Affx-89025772	0.0019961	0.00068975	0.0032159	0.83017	20002_1074		MT:1018:G:A	Affx-89025772	0.0019961	0.00071848	0.0032163	0.82323	20002_1074		MT:1018:G:A	Affx-89025772	0.0019961	0.033938	NA	0.099429	0.75252	20002_1074
MT:1018:G:A	Affx-89025772	0.0019961	0.00012764	0.005077	0.97994	20002_1465		MT:1018:G:A	Affx-89025772	0.0019961	0.00016626	0.0050773	0.97388	20002_1465		MT:1018:G:A	Affx-89025772	0.0019961	0.0026733	NA	0.0014604	0.96952	20002_1465
MT:1018:G:A	Affx-89025772	0.0019961	0.0038736	0.0059487	0.51494	20002_1473		MT:1018:G:A	Affx-89025772	0.0019961	0.0039447	0.0059496	0.50731	20002_1473		MT:1018:G:A	Affx-89025772	0.0019961	0.040011	NA	0.47285	0.49168	20002_1473
MT:1018:G:A	Affx-89025772	0.0019961	0.005448	0.0039649	0.16942	2443		MT:1018:G:A	Affx-89025772	0.0019961	0.0055122	0.0039661	0.16458	2443		MT:1018:G:A	Affx-89025772	0.0019961	0.11786	NA	2.0365	0.15357	2443
MT:1018:G:A	Affx-89025772	0.0019961	-0.032527	0.018193	0.073792	30650_irnt		MT:1018:G:A	Affx-89025772	0.0019961	-0.032565	0.018193	0.073453	30650_irnt		MT:1018:G:A	Affx-89025772	0.0019961	-0.032565	0.018193	NA	0.073453	30650_irnt
MT:1018:G:A	Affx-89025772	0.0019961	-0.013131	0.015383	0.39333	30700_irnt		MT:1018:G:A	Affx-89025772	0.0019961	-0.013231	0.015384	0.38976	30700_irnt		MT:1018:G:A	Affx-89025772	0.0019961	-0.013231	0.015384	NA	0.38976	30700_irnt
MT:1018:G:A	Affx-89025772	0.0019961	0.028891	0.019624	0.14097	30740_irnt		MT:1018:G:A	Affx-89025772	0.0019961	0.02901	0.019625	0.13934	30740_irnt		MT:1018:G:A	Affx-89025772	0.0019961	0.02901	0.019625	NA	0.13934	30740_irnt
MT:1018:G:A	Affx-89025772	0.0019961	-0.0060001	0.017983	0.73864	30760_irnt		MT:1018:G:A	Affx-89025772	0.0019961	-0.0064779	0.017991	0.7188	30760_irnt		MT:1018:G:A	Affx-89025772	0.0019961	-0.0064779	0.017991	NA	0.7188	30760_irnt
MT:1018:G:A	Affx-89025772	0.0019961	-0.028202	0.01872	0.13192	30780_irnt		MT:1018:G:A	Affx-89025772	0.0019961	-0.028242	0.01872	0.13139	30780_irnt		MT:1018:G:A	Affx-89025772	0.0019961	-0.028242	0.01872	NA	0.13139	30780_irnt
MT:1018:G:A	Affx-89025772	0.0019961	-0.0087636	0.018417	0.63419	30870_irnt		MT:1018:G:A	Affx-89025772	0.0019961	-0.0082847	0.018427	0.653	30870_irnt		MT:1018:G:A	Affx-89025772	0.0019961	-0.0082847	0.018427	NA	0.653	30870_irnt
MT:1018:G:A	Affx-89025772	0.0019961	-0.001162	0.023662	0.96083	3148_irnt		MT:1018:G:A	Affx-89025772	0.0019961	-0.0013182	0.023663	0.95558	3148_irnt		MT:1018:G:A	Affx-89025772	0.0019961	-0.0013182	0.023663	NA	0.95558	3148_irnt
MT:1018:G:A	Affx-89025772	0.0019961	-0.0067189	0.0051055	0.18817	3393		MT:1018:G:A	Affx-89025772	0.0019961	-0.0067425	0.0051055	0.18663	3393		MT:1018:G:A	Affx-89025772	0.0019961	-0.15702	NA	1.6873	0.19395	3393
MT:1018:G:A	Affx-89025772	0.0019961	0.0017995	0.018864	0.92401	4079_irnt		MT:1018:G:A	Affx-89025772	0.0019961	0.0018628	0.018865	0.92134	4079_irnt		MT:1018:G:A	Affx-89025772	0.0019961	0.0018628	0.018865	NA	0.92134	4079_irnt
MT:1018:G:A	Affx-89025772	0.0019961	2.1348e-05	0.017863	0.99905	4080_irnt		MT:1018:G:A	Affx-89025772	0.0019961	0.0001707	0.017864	0.99238	4080_irnt		MT:1018:G:A	Affx-89025772	0.0019961	0.0001707	0.017864	NA	0.99238	4080_irnt
MT:1018:G:A	Affx-89025772	0.0019961	0.0013773	0.0038748	0.72225	C3_SKIN		MT:1018:G:A	Affx-89025772	0.0019961	0.0013686	0.0038748	0.72394	C3_SKIN		MT:1018:G:A	Affx-89025772	0.0019961	0.037501	NA	0.1776	0.67344	C3_SKIN
MT:1018:G:A	Affx-89025772	0.0019961	-0.0013045	0.0033036	0.69293	H26		MT:1018:G:A	Affx-89025772	0.0019961	-0.001301	0.0033036	0.69372	H26		MT:1018:G:A	Affx-89025772	0.0019961	-0.030988	NA	0.079625	0.77781	H26
MT:1018:G:A	Affx-89025772	0.0019961	0.0063457	0.0030547	0.03777	I9_CHD		MT:1018:G:A	Affx-89025772	0.0019961	0.0063792	0.0030551	0.036793	I9_CHD		MT:1018:G:A	Affx-89025772	0.0019961	0.20936	NA	4.259	0.039043	I9_CHD
MT:1018:G:A	Affx-89025772	0.0019961	0.0050452	0.0042606	0.23636	I9_IHD		MT:1018:G:A	Affx-89025772	0.0019961	0.0050968	0.0042614	0.23169	I9_IHD		MT:1018:G:A	Affx-89025772	0.0019961	0.096649	NA	1.5205	0.21754	I9_IHD
MT:1018:G:A	Affx-89025772	0.0019961	0.0069135	0.0032512	0.033466	K21		MT:1018:G:A	Affx-89025772	0.0019961	0.0069277	0.0032512	0.033106	K21		MT:1018:G:A	Affx-89025772	0.0019961	0.20076	NA	4.417	0.035584	K21
MT:1018:G:A	Affx-89025772	0.0019961	0.0075186	0.0034942	0.03142	K57		MT:1018:G:A	Affx-89025772	0.0019961	0.0075367	0.0034943	0.03102	K57		MT:1018:G:A	Affx-89025772	0.0019961	0.19386	NA	4.5775	0.032395	K57
MT:1243:T:C	Affx-34461684	0.019374	0.0025047	0.0025698	0.32971	20002_1065		MT:1243:T:C	Affx-34461684	0.019374	0.0024934	0.0025699	0.33193	20002_1065		MT:1243:T:C	Affx-34461684	0.019374	0.013679	NA	0.93856	0.33265	20002_1065
MT:1243:T:C	Affx-34461684	0.019374	0.0014187	0.0010411	0.17296	20002_1074		MT:1243:T:C	Affx-34461684	0.019374	0.0014632	0.0010411	0.1599	20002_1074		MT:1243:T:C	Affx-34461684	0.019374	0.047253	NA	1.9474	0.16287	20002_1074
MT:1243:T:C	Affx-34461684	0.019374	-0.00056169	0.0016435	0.73254	20002_1465		MT:1243:T:C	Affx-34461684	0.019374	-0.00059677	0.0016435	0.71652	20002_1465		MT:1243:T:C	Affx-34461684	0.019374	-0.0077916	NA	0.12339	0.72538	20002_1465
MT:1243:T:C	Affx-34461684	0.019374	0.0034305	0.0019257	0.074849	20002_1473		MT:1243:T:C	Affx-34461684	0.019374	0.003366	0.0019259	0.0805	20002_1473		MT:1243:T:C	Affx-34461684	0.019374	0.032595	NA	3.0627	0.080108	20002_1473
MT:1243:T:C	Affx-34461684	0.019374	0.00088056	0.001283	0.49252	2443		MT:1243:T:C	Affx-34461684	0.019374	0.0008988	0.0012833	0.4837	2443		MT:1243:T:C	Affx-34461684	0.019374	0.020118	NA	0.51396	0.47343	2443
MT:1243:T:C	Affx-34461684	0.019374	-0.0062447	0.0058736	0.2877	30650_irnt		MT:1243:T:C	Affx-34461684	0.019374	-0.0061712	0.0058732	0.29338	30650_irnt		MT:1243:T:C	Affx-34461684	0.019374	-0.0061712	0.0058732	NA	0.29338	30650_irnt
MT:1243:T:C	Affx-34461684	0.019374	0.00018997	0.0049777	0.96956	30700_irnt		MT:1243:T:C	Affx-34461684	0.019374	0.00021672	0.0049774	0.96527	30700_irnt		MT:1243:T:C	Affx-34461684	0.019374	0.00021672	0.0049774	NA	0.96527	30700_irnt
MT:1243:T:C	Affx-34461684	0.019374	0.0068748	0.0063947	0.28234	30740_irnt		MT:1243:T:C	Affx-34461684	0.019374	0.0068041	0.0063948	0.28733	30740_irnt		MT:1243:T:C	Affx-34461684	0.019374	0.0068041	0.0063948	NA	0.28733	30740_irnt
MT:1243:T:C	Affx-34461684	0.019374	-0.003397	0.00585	0.56145	30760_irnt		MT:1243:T:C	Affx-34461684	0.019374	-0.0031199	0.0058525	0.59397	30760_irnt		MT:1243:T:C	Affx-34461684	0.019374	-0.0031199	0.0058525	NA	0.59397	30760_irnt
MT:1243:T:C	Affx-34461684	0.019374	-0.0067412	0.0060454	0.26481	30780_irnt		MT:1243:T:C	Affx-34461684	0.019374	-0.0067868	0.0060449	0.26155	30780_irnt		MT:1243:T:C	Affx-34461684	0.019374	-0.0067868	0.0060449	NA	0.26155	30780_irnt
MT:1243:T:C	Affx-34461684	0.019374	0.0039624	0.0059564	0.5059	30870_irnt		MT:1243:T:C	Affx-34461684	0.019374	0.0036774	0.0059591	0.53716	30870_irnt		MT:1243:T:C	Affx-34461684	0.019374	0.0036774	0.0059591	NA	0.53716	30870_irnt
MT:1243:T:C	Affx-34461684	0.019374	-0.0028767	0.0077188	0.70939	3148_irnt		MT:1243:T:C	Affx-34461684	0.019374	-0.0028239	0.0077191	0.71449	3148_irnt		MT:1243:T:C	Affx-34461684	0.019374	-0.0028239	0.0077191	NA	0.71449	3148_irnt
MT:1243:T:C	Affx-34461684	0.019374	0.0010772	0.0016722	0.51948	3393		MT:1243:T:C	Affx-34461684	0.019374	0.0010829	0.0016722	0.51725	3393		MT:1243:T:C	Affx-34461684	0.019374	0.023762	NA	0.45053	0.50208	3393
MT:1243:T:C	Affx-34461684	0.019374	-3.4855e-05	0.0060947	0.99544	4079_irnt		MT:1243:T:C	Affx-34461684	0.019374	-0.0002743	0.0060944	0.9641	4079_irnt		MT:1243:T:C	Affx-34461684	0.019374	-0.0002743	0.0060944	NA	0.9641	4079_irnt
MT:1243:T:C	Affx-34461684	0.019374	0.0047921	0.005771	0.40633	4080_irnt		MT:1243:T:C	Affx-34461684	0.019374	0.0045438	0.005771	0.43108	4080_irnt		MT:1243:T:C	Affx-34461684	0.019374	0.0045438	0.005771	NA	0.43108	4080_irnt
MT:1243:T:C	Affx-34461684	0.019374	-0.0008947	0.0012544	0.47568	C3_SKIN		MT:1243:T:C	Affx-34461684	0.019374	-0.00088943	0.0012543	0.47825	C3_SKIN		MT:1243:T:C	Affx-34461684	0.019374	-0.020241	NA	0.47452	0.49092	C3_SKIN
MT:1243:T:C	Affx-34461684	0.019374	0.00016586	0.0010694	0.87675	H26		MT:1243:T:C	Affx-34461684	0.019374	0.00016249	0.0010694	0.87922	H26		MT:1243:T:C	Affx-34461684	0.019374	0.0063132	NA	0.034293	0.85308	H26
MT:1243:T:C	Affx-34461684	0.019374	0.00012957	0.00081316	0.8734	I48		MT:1243:T:C	Affx-34461684	0.019374	0.00012167	0.00081311	0.88106	I48		MT:1243:T:C	Affx-34461684	0.019374	0.0084395	NA	0.035932	0.84966	I48
MT:1243:T:C	Affx-34461684	0.019374	0.0003823	0.00098889	0.69906	I9_CHD		MT:1243:T:C	Affx-34461684	0.019374	0.00035297	0.00098894	0.72115	I9_CHD		MT:1243:T:C	Affx-34461684	0.019374	0.014037	NA	0.14871	0.69977	I9_CHD
MT:1243:T:C	Affx-34461684	0.019374	0.00029115	0.0013793	0.83282	I9_IHD		MT:1243:T:C	Affx-34461684	0.019374	0.00031538	0.0013794	0.81916	I9_IHD		MT:1243:T:C	Affx-34461684	0.019374	0.0062491	NA	0.056759	0.81169	I9_IHD
MT:1243:T:C	Affx-34461684	0.019374	-0.0003902	0.0010525	0.71083	K21		MT:1243:T:C	Affx-34461684	0.019374	-0.00040368	0.0010524	0.7013	K21		MT:1243:T:C	Affx-34461684	0.019374	-0.012339	NA	0.12535	0.7233	K21
MT:1243:T:C	Affx-34461684	0.019374	0.00032663	0.00091254	0.72039	K44		MT:1243:T:C	Affx-34461684	0.019374	0.00031634	0.00091249	0.72884	K44		MT:1243:T:C	Affx-34461684	0.019374	0.015205	NA	0.14694	0.70148	K44
MT:1243:T:C	Affx-34461684	0.019374	0.00066761	0.0011312	0.55507	K57		MT:1243:T:C	Affx-34461684	0.019374	0.00065116	0.0011311	0.56483	K57		MT:1243:T:C	Affx-34461684	0.019374	0.018992	NA	0.35553	0.551	K57
MT:1391:T:C	Affx-89025736	0.0013233	0.0062475	0.0097542	0.52186	20002_1065		MT:1391:T:C	Affx-89025736	0.0013233	0.0062538	0.0097553	0.52148	20002_1065		MT:1391:T:C	Affx-89025736	0.0013233	0.035951	NA	0.44976	0.50245	20002_1065
MT:1391:T:C	Affx-89025736	0.0013233	-0.0037456	0.0062385	0.54824	20002_1465		MT:1391:T:C	Affx-89025736	0.0013233	-0.003742	0.0062389	0.54864	20002_1465		MT:1391:T:C	Affx-89025736	0.0013233	-0.04507	NA	0.26558	0.60631	20002_1465
MT:1391:T:C	Affx-89025736	0.0013233	-0.0084109	0.0073096	0.24987	20002_1473		MT:1391:T:C	Affx-89025736	0.0013233	-0.0084044	0.0073107	0.25031	20002_1473		MT:1391:T:C	Affx-89025736	0.0013233	-0.083534	NA	1.2317	0.26707	20002_1473
MT:1391:T:C	Affx-89025736	0.0013233	-0.00058162	0.0048602	0.90474	2443		MT:1391:T:C	Affx-89025736	0.0013233	-0.00057963	0.0048616	0.9051	2443		MT:1391:T:C	Affx-89025736	0.0013233	-0.0021754	NA	0.0003998	0.98405	2443
MT:1391:T:C	Affx-89025736	0.0013233	0.0054573	0.022326	0.8069	30650_irnt		MT:1391:T:C	Affx-89025736	0.0013233	0.0054537	0.022326	0.80702	30650_irnt		MT:1391:T:C	Affx-89025736	0.0013233	0.0054537	0.022326	NA	0.80702	30650_irnt
MT:1391:T:C	Affx-89025736	0.0013233	-0.013621	0.018948	0.47222	30700_irnt		MT:1391:T:C	Affx-89025736	0.0013233	-0.013626	0.018948	0.47207	30700_irnt		MT:1391:T:C	Affx-89025736	0.0013233	-0.013626	0.018948	NA	0.47207	30700_irnt
MT:1391:T:C	Affx-89025736	0.0013233	0.050155	0.024419	0.039985	30740_irnt		MT:1391:T:C	Affx-89025736	0.0013233	0.050068	0.02442	0.040333	30740_irnt		MT:1391:T:C	Affx-89025736	0.0013233	0.050068	0.02442	NA	0.040333	30740_irnt
MT:1391:T:C	Affx-89025736	0.0013233	0.03732	0.022305	0.094291	30760_irnt		MT:1391:T:C	Affx-89025736	0.0013233	0.037579	0.022314	0.09217	30760_irnt		MT:1391:T:C	Affx-89025736	0.0013233	0.037579	0.022314	NA	0.09217	30760_irnt
MT:1391:T:C	Affx-89025736	0.0013233	0.011524	0.023007	0.61643	30780_irnt		MT:1391:T:C	Affx-89025736	0.0013233	0.011524	0.023007	0.61644	30780_irnt		MT:1391:T:C	Affx-89025736	0.0013233	0.011524	0.023007	NA	0.61644	30780_irnt
MT:1391:T:C	Affx-89025736	0.0013233	-0.0063225	0.022694	0.78055	30870_irnt		MT:1391:T:C	Affx-89025736	0.0013233	-0.0062908	0.022705	0.78173	30870_irnt		MT:1391:T:C	Affx-89025736	0.0013233	-0.0062908	0.022705	NA	0.78173	30870_irnt
MT:1391:T:C	Affx-89025736	0.0013233	-0.0085817	0.030074	0.77537	3148_irnt		MT:1391:T:C	Affx-89025736	0.0013233	-0.008686	0.030075	0.77273	3148_irnt		MT:1391:T:C	Affx-89025736	0.0013233	-0.008686	0.030075	NA	0.77273	3148_irnt
MT:1391:T:C	Affx-89025736	0.0013233	-0.023886	0.022749	0.29373	4079_irnt		MT:1391:T:C	Affx-89025736	0.0013233	-0.023903	0.022749	0.29339	4079_irnt		MT:1391:T:C	Affx-89025736	0.0013233	-0.023903	0.022749	NA	0.29339	4079_irnt
MT:1391:T:C	Affx-89025736	0.0013233	-0.023697	0.021541	0.27129	4080_irnt		MT:1391:T:C	Affx-89025736	0.0013233	-0.023748	0.021542	0.27028	4080_irnt		MT:1391:T:C	Affx-89025736	0.0013233	-0.023748	0.021542	NA	0.27028	4080_irnt
MT:1391:T:C	Affx-89025736	0.0013233	0.00017739	0.0047563	0.97025	C3_SKIN		MT:1391:T:C	Affx-89025736	0.0013233	0.00017693	0.0047563	0.97033	C3_SKIN		MT:1391:T:C	Affx-89025736	0.0013233	0.015776	NA	0.019948	0.88768	C3_SKIN
MT:1391:T:C	Affx-89025736	0.0013233	0.0091654	0.0052299	0.079688	I9_IHD		MT:1391:T:C	Affx-89025736	0.0013233	0.0091673	0.0052309	0.079683	I9_IHD		MT:1391:T:C	Affx-89025736	0.0013233	0.16872	NA	3.2466	0.071574	I9_IHD
MT:1406:T:C	Affx-89025696	0.0033542	0.0054224	0.0061311	0.37648	20002_1065		MT:1406:T:C	Affx-89025696	0.0033542	0.0055326	0.0061318	0.36691	20002_1065		MT:1406:T:C	Affx-89025696	0.0033542	0.030358	NA	0.81461	0.36676	20002_1065
MT:1406:T:C	Affx-89025696	0.0033542	0.0056733	0.0024838	0.022364	20002_1074		MT:1406:T:C	Affx-89025696	0.0033542	0.005714	0.0024841	0.021438	20002_1074		MT:1406:T:C	Affx-89025696	0.0033542	0.1772	NA	5.3874	0.020282	20002_1074
MT:1406:T:C	Affx-89025696	0.0033542	0.0021292	0.0039213	0.58714	20002_1465		MT:1406:T:C	Affx-89025696	0.0033542	0.0021828	0.0039215	0.57779	20002_1465		MT:1406:T:C	Affx-89025696	0.0033542	0.029908	NA	0.32759	0.56708	20002_1465
MT:1406:T:C	Affx-89025696	0.0033542	0.0083767	0.0045945	0.068277	20002_1473		MT:1406:T:C	Affx-89025696	0.0033542	0.0084754	0.0045952	0.065126	20002_1473		MT:1406:T:C	Affx-89025696	0.0033542	0.080467	NA	3.3926	0.06549	20002_1473
MT:1406:T:C	Affx-89025696	0.0033542	0.00072575	0.0030606	0.81256	2443		MT:1406:T:C	Affx-89025696	0.0033542	0.00081357	0.0030615	0.79044	2443		MT:1406:T:C	Affx-89025696	0.0033542	0.022274	NA	0.11046	0.73962	2443
MT:1406:T:C	Affx-89025696	0.0033542	-0.021603	0.014102	0.12554	30650_irnt		MT:1406:T:C	Affx-89025696	0.0033542	-0.021641	0.014102	0.12487	30650_irnt		MT:1406:T:C	Affx-89025696	0.0033542	-0.021641	0.014102	NA	0.12487	30650_irnt
MT:1406:T:C	Affx-89025696	0.0033542	-0.012912	0.011941	0.27958	30700_irnt		MT:1406:T:C	Affx-89025696	0.0033542	-0.013016	0.011942	0.27573	30700_irnt		MT:1406:T:C	Affx-89025696	0.0033542	-0.013016	0.011942	NA	0.27573	30700_irnt
MT:1406:T:C	Affx-89025696	0.0033542	0.028722	0.015495	0.063794	30740_irnt		MT:1406:T:C	Affx-89025696	0.0033542	0.028884	0.015495	0.062316	30740_irnt		MT:1406:T:C	Affx-89025696	0.0033542	0.028884	0.015495	NA	0.062316	30740_irnt
MT:1406:T:C	Affx-89025696	0.0033542	0.002456	0.014167	0.86237	30760_irnt		MT:1406:T:C	Affx-89025696	0.0033542	0.0018393	0.014173	0.89675	30760_irnt		MT:1406:T:C	Affx-89025696	0.0033542	0.0018393	0.014173	NA	0.89675	30760_irnt
MT:1406:T:C	Affx-89025696	0.0033542	-0.03734	0.014512	0.010083	30780_irnt		MT:1406:T:C	Affx-89025696	0.0033542	-0.037376	0.014512	0.01001	30780_irnt		MT:1406:T:C	Affx-89025696	0.0033542	-0.037376	0.014512	NA	0.01001	30780_irnt
MT:1406:T:C	Affx-89025696	0.0033542	-0.012996	0.01428	0.36278	30870_irnt		MT:1406:T:C	Affx-89025696	0.0033542	-0.012512	0.014288	0.38118	30870_irnt		MT:1406:T:C	Affx-89025696	0.0033542	-0.012512	0.014288	NA	0.38118	30870_irnt
MT:1406:T:C	Affx-89025696	0.0033542	-0.049637	0.018596	0.0076012	3148_irnt		MT:1406:T:C	Affx-89025696	0.0033542	-0.049945	0.018596	0.0072363	3148_irnt		MT:1406:T:C	Affx-89025696	0.0033542	-0.049945	0.018596	NA	0.0072363	3148_irnt
MT:1406:T:C	Affx-89025696	0.0033542	0.0036732	0.003928	0.34972	3393		MT:1406:T:C	Affx-89025696	0.0033542	0.0036511	0.0039279	0.35262	3393		MT:1406:T:C	Affx-89025696	0.0033542	0.080126	NA	0.97685	0.32298	3393
MT:1406:T:C	Affx-89025696	0.0033542	-0.012483	0.014389	0.38566	4079_irnt		MT:1406:T:C	Affx-89025696	0.0033542	-0.012414	0.014389	0.38827	4079_irnt		MT:1406:T:C	Affx-89025696	0.0033542	-0.012414	0.014389	NA	0.38827	4079_irnt
MT:1406:T:C	Affx-89025696	0.0033542	0.0010512	0.013625	0.9385	4080_irnt		MT:1406:T:C	Affx-89025696	0.0033542	0.0012139	0.013626	0.92901	4080_irnt		MT:1406:T:C	Affx-89025696	0.0033542	0.0012139	0.013626	NA	0.92901	4080_irnt
MT:1406:T:C	Affx-89025696	0.0033542	-0.0036865	0.0029927	0.21802	C3_SKIN		MT:1406:T:C	Affx-89025696	0.0033542	-0.0036986	0.0029927	0.21651	C3_SKIN		MT:1406:T:C	Affx-89025696	0.0033542	-0.088602	NA	1.4594	0.22703	C3_SKIN
MT:1406:T:C	Affx-89025696	0.0033542	0.0031142	0.0025516	0.22228	H26		MT:1406:T:C	Affx-89025696	0.0033542	0.003119	0.0025515	0.22156	H26		MT:1406:T:C	Affx-89025696	0.0033542	0.097612	NA	1.5939	0.20677	H26
MT:1406:T:C	Affx-89025696	0.0033542	-0.0051865	0.0019401	0.0075105	I48		MT:1406:T:C	Affx-89025696	0.0033542	-0.0051747	0.0019401	0.0076481	I48		MT:1406:T:C	Affx-89025696	0.0033542	-0.39003	NA	8.2037	0.0041805	I48
MT:1406:T:C	Affx-89025696	0.0033542	0.0015793	0.0023594	0.50326	I9_CHD		MT:1406:T:C	Affx-89025696	0.0033542	0.0016258	0.0023596	0.49083	I9_CHD		MT:1406:T:C	Affx-89025696	0.0033542	0.067752	NA	0.62395	0.42958	I9_CHD
MT:1406:T:C	Affx-89025696	0.0033542	0.0017572	0.0032908	0.59335	I9_IHD		MT:1406:T:C	Affx-89025696	0.0033542	0.0018296	0.0032914	0.5783	I9_IHD		MT:1406:T:C	Affx-89025696	0.0033542	0.039695	NA	0.40526	0.52438	I9_IHD
MT:1406:T:C	Affx-89025696	0.0033542	-0.0020301	0.0025111	0.41884	K21		MT:1406:T:C	Affx-89025696	0.0033542	-0.0020103	0.0025111	0.42339	K21		MT:1406:T:C	Affx-89025696	0.0033542	-0.063821	NA	0.54921	0.45864	K21
MT:1406:T:C	Affx-89025696	0.0033542	-0.0030163	0.0021772	0.16593	K44		MT:1406:T:C	Affx-89025696	0.0033542	-0.0030007	0.0021772	0.16814	K44		MT:1406:T:C	Affx-89025696	0.0033542	-0.14137	NA	1.8414	0.17479	K44
MT:1406:T:C	Affx-89025696	0.0033542	-0.0024149	0.0026988	0.37089	K57		MT:1406:T:C	Affx-89025696	0.0033542	-0.0023899	0.0026989	0.37588	K57		MT:1406:T:C	Affx-89025696	0.0033542	-0.068094	NA	0.71146	0.39896	K57
MT:1438:A:G	Affx-34461788	0.97108	0.0039036	0.0021155	0.065009	20002_1065		MT:1438:A:G	Affx-34461788	0.97108	0.003882	0.0021157	0.066537	20002_1065		MT:1438:A:G	Affx-34461788	0.97108	0.021588	NA	3.3665	0.066534	20002_1065
MT:1438:A:G	Affx-34461788	0.97108	0.00093989	0.00085704	0.27278	20002_1074		MT:1438:A:G	Affx-34461788	0.97108	0.00093268	0.00085715	0.27654	20002_1074		MT:1438:A:G	Affx-34461788	0.97108	0.030429	NA	1.0682	0.30136	20002_1074
MT:1438:A:G	Affx-34461788	0.97108	-0.00071228	0.001353	0.59859	20002_1465		MT:1438:A:G	Affx-34461788	0.97108	-0.0007232	0.0013531	0.59301	20002_1465		MT:1438:A:G	Affx-34461788	0.97108	-0.010086	NA	0.30402	0.58137	20002_1465
MT:1438:A:G	Affx-34461788	0.97108	0.0023519	0.0015853	0.13793	20002_1473		MT:1438:A:G	Affx-34461788	0.97108	0.0023318	0.0015856	0.14139	20002_1473		MT:1438:A:G	Affx-34461788	0.97108	0.023079	NA	2.1427	0.14325	20002_1473
MT:1438:A:G	Affx-34461788	0.97108	-0.00025392	0.0010565	0.81006	2443		MT:1438:A:G	Affx-34461788	0.97108	-0.00027227	0.0010568	0.79669	2443		MT:1438:A:G	Affx-34461788	0.97108	-0.0065761	NA	0.079255	0.77831	2443
MT:1438:A:G	Affx-34461788	0.97108	-0.00013309	0.0048292	0.97801	30650_irnt		MT:1438:A:G	Affx-34461788	0.97108	-0.0001214	0.0048292	0.97994	30650_irnt		MT:1438:A:G	Affx-34461788	0.97108	-0.0001214	0.0048292	NA	0.97994	30650_irnt
MT:1438:A:G	Affx-34461788	0.97108	-0.0079674	0.0040922	0.051539	30700_irnt		MT:1438:A:G	Affx-34461788	0.97108	-0.0079365	0.0040923	0.052456	30700_irnt		MT:1438:A:G	Affx-34461788	0.97108	-0.0079365	0.0040923	NA	0.052456	30700_irnt
MT:1438:A:G	Affx-34461788	0.97108	-0.0027286	0.0052509	0.60332	30740_irnt		MT:1438:A:G	Affx-34461788	0.97108	-0.0027369	0.005251	0.60222	30740_irnt		MT:1438:A:G	Affx-34461788	0.97108	-0.0027369	0.005251	NA	0.60222	30740_irnt
MT:1438:A:G	Affx-34461788	0.97108	0.0035378	0.0048053	0.46159	30760_irnt		MT:1438:A:G	Affx-34461788	0.97108	0.0035752	0.0048074	0.45707	30760_irnt		MT:1438:A:G	Affx-34461788	0.97108	0.0035752	0.0048074	NA	0.45707	30760_irnt
MT:1438:A:G	Affx-34461788	0.97108	0.0043524	0.0049743	0.38159	30780_irnt		MT:1438:A:G	Affx-34461788	0.97108	0.0043636	0.0049743	0.38037	30780_irnt		MT:1438:A:G	Affx-34461788	0.97108	0.0043636	0.0049743	NA	0.38037	30780_irnt
MT:1438:A:G	Affx-34461788	0.97108	0.00056304	0.004896	0.90845	30870_irnt		MT:1438:A:G	Affx-34461788	0.97108	0.0004185	0.0048986	0.93192	30870_irnt		MT:1438:A:G	Affx-34461788	0.97108	0.0004185	0.0048986	NA	0.93192	30870_irnt
MT:1438:A:G	Affx-34461788	0.97108	-0.017031	0.0063364	0.0071919	3148_irnt		MT:1438:A:G	Affx-34461788	0.97108	-0.017065	0.0063366	0.0070794	3148_irnt		MT:1438:A:G	Affx-34461788	0.97108	-0.017065	0.0063366	NA	0.0070794	3148_irnt
MT:1438:A:G	Affx-34461788	0.97108	0.00085684	0.0013675	0.53094	3393		MT:1438:A:G	Affx-34461788	0.97108	0.0008611	0.0013675	0.5289	3393		MT:1438:A:G	Affx-34461788	0.97108	0.018123	NA	0.36436	0.5461	3393
MT:1438:A:G	Affx-34461788	0.97108	0.0016206	0.0050084	0.74626	4079_irnt		MT:1438:A:G	Affx-34461788	0.97108	0.001606	0.0050084	0.74848	4079_irnt		MT:1438:A:G	Affx-34461788	0.97108	0.001606	0.0050084	NA	0.74848	4079_irnt
MT:1438:A:G	Affx-34461788	0.97108	0.0081759	0.0047424	0.084706	4080_irnt		MT:1438:A:G	Affx-34461788	0.97108	0.0081469	0.0047427	0.085839	4080_irnt		MT:1438:A:G	Affx-34461788	0.97108	0.0081469	0.0047427	NA	0.085839	4080_irnt
MT:1438:A:G	Affx-34461788	0.97108	-0.00051251	0.0010325	0.61963	C3_SKIN		MT:1438:A:G	Affx-34461788	0.97108	-0.00051011	0.0010325	0.62127	C3_SKIN		MT:1438:A:G	Affx-34461788	0.97108	-0.01259	NA	0.27889	0.59743	C3_SKIN
MT:1438:A:G	Affx-34461788	0.97108	0.0013067	0.00088028	0.13771	H26		MT:1438:A:G	Affx-34461788	0.97108	0.0013057	0.00088028	0.13801	H26		MT:1438:A:G	Affx-34461788	0.97108	0.040956	NA	2.0229	0.15494	H26
MT:1438:A:G	Affx-34461788	0.97108	0.00043244	0.00066933	0.51823	I48		MT:1438:A:G	Affx-34461788	0.97108	0.00043006	0.00066934	0.52054	I48		MT:1438:A:G	Affx-34461788	0.97108	0.022446	NA	0.36095	0.54798	I48
MT:1438:A:G	Affx-34461788	0.97108	-0.0006233	0.00081397	0.44382	I9_CHD		MT:1438:A:G	Affx-34461788	0.97108	-0.00063266	0.00081408	0.43707	I9_CHD		MT:1438:A:G	Affx-34461788	0.97108	-0.02494	NA	0.6921	0.40545	I9_CHD
MT:1438:A:G	Affx-34461788	0.97108	0.0008116	0.0011353	0.47469	I9_IHD		MT:1438:A:G	Affx-34461788	0.97108	0.00079808	0.0011355	0.48216	I9_IHD		MT:1438:A:G	Affx-34461788	0.97108	0.0142	NA	0.41868	0.5176	I9_IHD
MT:1438:A:G	Affx-34461788	0.97108	-0.0011494	0.00086633	0.18458	K21		MT:1438:A:G	Affx-34461788	0.97108	-0.0011535	0.00086634	0.18306	K21		MT:1438:A:G	Affx-34461788	0.97108	-0.037551	NA	1.8056	0.17903	K21
MT:1438:A:G	Affx-34461788	0.97108	0.00024296	0.00075114	0.74635	K44		MT:1438:A:G	Affx-34461788	0.97108	0.0002398	0.00075114	0.74954	K44		MT:1438:A:G	Affx-34461788	0.97108	0.0086126	NA	0.067445	0.79509	K44
MT:1438:A:G	Affx-34461788	0.97108	-0.00097273	0.0009311	0.29616	K57		MT:1438:A:G	Affx-34461788	0.97108	-0.00097778	0.00093112	0.29367	K57		MT:1438:A:G	Affx-34461788	0.97108	-0.028503	NA	1.1826	0.27682	K57
MT:1555:A:G	Affx-89025706	0.0023887	0.0054505	0.00726	0.4528	20002_1065		MT:1555:A:G	Affx-89025706	0.0023887	0.0054546	0.0072608	0.45251	20002_1065		MT:1555:A:G	Affx-89025706	0.0023887	0.030112	NA	0.57236	0.44932	20002_1065
MT:1555:A:G	Affx-89025706	0.0023887	-0.00096881	0.0029412	0.74186	20002_1074		MT:1555:A:G	Affx-89025706	0.0023887	-0.00096836	0.0029416	0.74201	20002_1074		MT:1555:A:G	Affx-89025706	0.0023887	-0.027359	NA	0.075848	0.783	20002_1074
MT:1555:A:G	Affx-89025706	0.0023887	0.0042269	0.0046433	0.36265	20002_1465		MT:1555:A:G	Affx-89025706	0.0023887	0.0042295	0.0046436	0.36238	20002_1465		MT:1555:A:G	Affx-89025706	0.0023887	0.0583	NA	0.90649	0.34105	20002_1465
MT:1555:A:G	Affx-89025706	0.0023887	0.00044206	0.0054406	0.93524	20002_1473		MT:1555:A:G	Affx-89025706	0.0023887	0.00044684	0.0054414	0.93455	20002_1473		MT:1555:A:G	Affx-89025706	0.0023887	0.0049262	NA	0.0086059	0.92609	20002_1473
MT:1555:A:G	Affx-89025706	0.0023887	0.00051734	0.0036254	0.88653	2443		MT:1555:A:G	Affx-89025706	0.0023887	0.00052163	0.0036265	0.88563	2443		MT:1555:A:G	Affx-89025706	0.0023887	0.014844	NA	0.035413	0.85073	2443
MT:1555:A:G	Affx-89025706	0.0023887	-0.01172	0.016517	0.47797	30650_irnt		MT:1555:A:G	Affx-89025706	0.0023887	-0.011732	0.016517	0.47752	30650_irnt		MT:1555:A:G	Affx-89025706	0.0023887	-0.011732	0.016517	NA	0.47752	30650_irnt
MT:1555:A:G	Affx-89025706	0.0023887	-0.019469	0.014	0.16435	30700_irnt		MT:1555:A:G	Affx-89025706	0.0023887	-0.019495	0.014001	0.16379	30700_irnt		MT:1555:A:G	Affx-89025706	0.0023887	-0.019495	0.014001	NA	0.16379	30700_irnt
MT:1555:A:G	Affx-89025706	0.0023887	0.0048317	0.018103	0.78955	30740_irnt		MT:1555:A:G	Affx-89025706	0.0023887	0.0048904	0.018104	0.78706	30740_irnt		MT:1555:A:G	Affx-89025706	0.0023887	0.0048904	0.018104	NA	0.78706	30740_irnt
MT:1555:A:G	Affx-89025706	0.0023887	-0.0091014	0.016599	0.58347	30760_irnt		MT:1555:A:G	Affx-89025706	0.0023887	-0.0093481	0.016606	0.57348	30760_irnt		MT:1555:A:G	Affx-89025706	0.0023887	-0.0093481	0.016606	NA	0.57348	30760_irnt
MT:1555:A:G	Affx-89025706	0.0023887	-0.0044047	0.017	0.79556	30780_irnt		MT:1555:A:G	Affx-89025706	0.0023887	-0.0044134	0.017	0.79516	30780_irnt		MT:1555:A:G	Affx-89025706	0.0023887	-0.0044134	0.017	NA	0.79516	30780_irnt
MT:1555:A:G	Affx-89025706	0.0023887	0.019204	0.01677	0.25215	30870_irnt		MT:1555:A:G	Affx-89025706	0.0023887	0.019343	0.016779	0.24899	30870_irnt		MT:1555:A:G	Affx-89025706	0.0023887	0.019343	0.016779	NA	0.24899	30870_irnt
MT:1555:A:G	Affx-89025706	0.0023887	-0.031232	0.021115	0.1391	3148_irnt		MT:1555:A:G	Affx-89025706	0.0023887	-0.031107	0.021116	0.1407	3148_irnt		MT:1555:A:G	Affx-89025706	0.0023887	-0.031107	0.021116	NA	0.1407	3148_irnt
MT:1555:A:G	Affx-89025706	0.0023887	0.0098618	0.004784	0.039264	3393		MT:1555:A:G	Affx-89025706	0.0023887	0.0098489	0.004784	0.039522	3393		MT:1555:A:G	Affx-89025706	0.0023887	0.18512	NA	4.0569	0.043991	3393
MT:1555:A:G	Affx-89025706	0.0023887	0.024117	0.017109	0.15867	4079_irnt		MT:1555:A:G	Affx-89025706	0.0023887	0.024154	0.01711	0.15803	4079_irnt		MT:1555:A:G	Affx-89025706	0.0023887	0.024154	0.01711	NA	0.15803	4079_irnt
MT:1555:A:G	Affx-89025706	0.0023887	0.014536	0.016201	0.3696	4080_irnt		MT:1555:A:G	Affx-89025706	0.0023887	0.01462	0.016202	0.36688	4080_irnt		MT:1555:A:G	Affx-89025706	0.0023887	0.01462	0.016202	NA	0.36688	4080_irnt
MT:1555:A:G	Affx-89025706	0.0023887	0.0069892	0.0035417	0.048454	C3_SKIN		MT:1555:A:G	Affx-89025706	0.0023887	0.0069888	0.0035417	0.048466	C3_SKIN		MT:1555:A:G	Affx-89025706	0.0023887	0.14939	NA	3.8928	0.048493	C3_SKIN
MT:1555:A:G	Affx-89025706	0.0023887	0.00020956	0.0030196	0.94467	H26		MT:1555:A:G	Affx-89025706	0.0023887	0.00020977	0.0030196	0.94462	H26		MT:1555:A:G	Affx-89025706	0.0023887	0.013139	NA	0.018374	0.89218	H26
MT:1555:A:G	Affx-89025706	0.0023887	-0.0016556	0.0027922	0.55323	I9_CHD		MT:1555:A:G	Affx-89025706	0.0023887	-0.0016538	0.0027925	0.55369	I9_CHD		MT:1555:A:G	Affx-89025706	0.0023887	-0.053891	NA	0.25743	0.61189	I9_CHD
MT:1555:A:G	Affx-89025706	0.0023887	0.003535	0.0038944	0.36404	I9_IHD		MT:1555:A:G	Affx-89025706	0.0023887	0.0035362	0.0038952	0.36396	I9_IHD		MT:1555:A:G	Affx-89025706	0.0023887	0.065054	NA	0.83321	0.36135	I9_IHD
MT:1555:A:G	Affx-89025706	0.0023887	3.3178e-05	0.0029718	0.99109	K21		MT:1555:A:G	Affx-89025706	0.0023887	3.3978e-05	0.0029718	0.99088	K21		MT:1555:A:G	Affx-89025706	0.0023887	0.010053	NA	0.010639	0.91785	K21
MT:1555:A:G	Affx-89025706	0.0023887	-0.0033044	0.0025766	0.19968	K44		MT:1555:A:G	Affx-89025706	0.0023887	-0.0033038	0.0025766	0.19977	K44		MT:1555:A:G	Affx-89025706	0.0023887	-0.15747	NA	1.5581	0.21195	K44
MT:1555:A:G	Affx-89025706	0.0023887	-0.0045311	0.0031939	0.156	K57		MT:1555:A:G	Affx-89025706	0.0023887	-0.0045302	0.003194	0.15609	K57		MT:1555:A:G	Affx-89025706	0.0023887	-0.14208	NA	1.9971	0.1576	K57
MT:1719:G:A	Affx-79381658	0.083083	-0.0016736	0.0012845	0.19262	20002_1065		MT:1719:G:A	Affx-79381658	0.083083	-0.0016705	0.0012847	0.19348	20002_1065		MT:1719:G:A	Affx-79381658	0.083083	-0.0093098	NA	1.7098	0.19102	20002_1065
MT:1719:G:A	Affx-79381658	0.083083	-0.00073332	0.00052039	0.15879	20002_1074		MT:1719:G:A	Affx-79381658	0.083083	-0.00073323	0.00052046	0.15889	20002_1074		MT:1719:G:A	Affx-79381658	0.083083	-0.025882	NA	2.1247	0.14494	20002_1074
MT:1719:G:A	Affx-79381658	0.083083	-0.00050737	0.00082156	0.53686	20002_1465		MT:1719:G:A	Affx-79381658	0.083083	-0.00050532	0.00082161	0.53853	20002_1465		MT:1719:G:A	Affx-79381658	0.083083	-0.0069125	NA	0.38503	0.53492	20002_1465
MT:1719:G:A	Affx-79381658	0.083083	-0.0014809	0.00096262	0.12394	20002_1473		MT:1719:G:A	Affx-79381658	0.083083	-0.0014771	0.00096276	0.12496	20002_1473		MT:1719:G:A	Affx-79381658	0.083083	-0.014758	NA	2.3963	0.12163	20002_1473
MT:1719:G:A	Affx-79381658	0.083083	-0.00023464	0.00064156	0.71456	2443		MT:1719:G:A	Affx-79381658	0.083083	-0.00023356	0.00064175	0.7159	2443		MT:1719:G:A	Affx-79381658	0.083083	-0.0050773	NA	0.12607	0.72254	2443
MT:1719:G:A	Affx-79381658	0.083083	0.012409	0.0029325	2.3227e-05	30650_irnt		MT:1719:G:A	Affx-79381658	0.083083	0.012407	0.0029325	2.3275e-05	30650_irnt		MT:1719:G:A	Affx-79381658	0.083083	0.012407	0.0029325	NA	2.3275e-05	30650_irnt
MT:1719:G:A	Affx-79381658	0.083083	-0.011267	0.002485	5.79e-06	30700_irnt		MT:1719:G:A	Affx-79381658	0.083083	-0.011268	0.0024851	5.7816e-06	30700_irnt		MT:1719:G:A	Affx-79381658	0.083083	-0.011268	0.0024851	NA	5.7816e-06	30700_irnt
MT:1719:G:A	Affx-79381658	0.083083	-0.0015086	0.0031894	0.6362	30740_irnt		MT:1719:G:A	Affx-79381658	0.083083	-0.0015121	0.0031895	0.63544	30740_irnt		MT:1719:G:A	Affx-79381658	0.083083	-0.0015121	0.0031895	NA	0.63544	30740_irnt
MT:1719:G:A	Affx-79381658	0.083083	0.00089779	0.0029193	0.75844	30760_irnt		MT:1719:G:A	Affx-79381658	0.083083	0.0009106	0.0029206	0.7552	30760_irnt		MT:1719:G:A	Affx-79381658	0.083083	0.0009106	0.0029206	NA	0.7552	30760_irnt
MT:1719:G:A	Affx-79381658	0.083083	0.0012115	0.0030194	0.68824	30780_irnt		MT:1719:G:A	Affx-79381658	0.083083	0.0012131	0.0030194	0.68785	30780_irnt		MT:1719:G:A	Affx-79381658	0.083083	0.0012131	0.0030194	NA	0.68785	30780_irnt
MT:1719:G:A	Affx-79381658	0.083083	-0.0022232	0.0029737	0.45468	30870_irnt		MT:1719:G:A	Affx-79381658	0.083083	-0.0022217	0.0029752	0.45522	30870_irnt		MT:1719:G:A	Affx-79381658	0.083083	-0.0022217	0.0029752	NA	0.45522	30870_irnt
MT:1719:G:A	Affx-79381658	0.083083	-0.0033778	0.003851	0.38042	3148_irnt		MT:1719:G:A	Affx-79381658	0.083083	-0.0033952	0.0038512	0.37799	3148_irnt		MT:1719:G:A	Affx-79381658	0.083083	-0.0033952	0.0038512	NA	0.37799	3148_irnt
MT:1719:G:A	Affx-79381658	0.083083	-0.0011563	0.00083345	0.16534	3393		MT:1719:G:A	Affx-79381658	0.083083	-0.0011547	0.00083345	0.16592	3393		MT:1719:G:A	Affx-79381658	0.083083	-0.025494	NA	1.9629	0.1612	3393
MT:1719:G:A	Affx-79381658	0.083083	-0.0046119	0.003049	0.13039	4079_irnt		MT:1719:G:A	Affx-79381658	0.083083	-0.0046068	0.0030491	0.13082	4079_irnt		MT:1719:G:A	Affx-79381658	0.083083	-0.0046068	0.0030491	NA	0.13082	4079_irnt
MT:1719:G:A	Affx-79381658	0.083083	-0.0041331	0.0028872	0.15228	4080_irnt		MT:1719:G:A	Affx-79381658	0.083083	-0.0041285	0.0028874	0.15276	4080_irnt		MT:1719:G:A	Affx-79381658	0.083083	-0.0041285	0.0028874	NA	0.15276	4080_irnt
MT:1719:G:A	Affx-79381658	0.083083	0.00056014	0.000627	0.37166	C3_SKIN		MT:1719:G:A	Affx-79381658	0.083083	0.00055974	0.000627	0.372	C3_SKIN		MT:1719:G:A	Affx-79381658	0.083083	0.012737	NA	0.77683	0.37811	C3_SKIN
MT:1719:G:A	Affx-79381658	0.083083	0.00043701	0.00053457	0.41365	H26		MT:1719:G:A	Affx-79381658	0.083083	0.00043721	0.00053457	0.41343	H26		MT:1719:G:A	Affx-79381658	0.083083	0.01361	NA	0.64677	0.42127	H26
MT:1719:G:A	Affx-79381658	0.083083	0.00015404	0.00040646	0.7047	I48		MT:1719:G:A	Affx-79381658	0.083083	0.0001545	0.00040646	0.70386	I48		MT:1719:G:A	Affx-79381658	0.083083	0.0086019	NA	0.14834	0.70013	I48
MT:1719:G:A	Affx-79381658	0.083083	-0.00037236	0.0004943	0.45126	I9_CHD		MT:1719:G:A	Affx-79381658	0.083083	-0.00037058	0.00049436	0.45348	I9_CHD		MT:1719:G:A	Affx-79381658	0.083083	-0.01458	NA	0.61492	0.43294	I9_CHD
MT:1719:G:A	Affx-79381658	0.083083	-0.00042873	0.00068943	0.53404	I9_IHD		MT:1719:G:A	Affx-79381658	0.083083	-0.00042738	0.00068956	0.5354	I9_IHD		MT:1719:G:A	Affx-79381658	0.083083	-0.0088093	NA	0.43966	0.50729	I9_IHD
MT:1719:G:A	Affx-79381658	0.083083	-0.00062799	0.00052609	0.2326	K21		MT:1719:G:A	Affx-79381658	0.083083	-0.00062718	0.0005261	0.23321	K21		MT:1719:G:A	Affx-79381658	0.083083	-0.020783	NA	1.4075	0.23548	K21
MT:1719:G:A	Affx-79381658	0.083083	-0.00026639	0.00045614	0.55921	K44		MT:1719:G:A	Affx-79381658	0.083083	-0.00026577	0.00045614	0.56013	K44		MT:1719:G:A	Affx-79381658	0.083083	-0.011552	NA	0.33016	0.56557	K44
MT:1719:G:A	Affx-79381658	0.083083	-0.00028588	0.00056542	0.61313	K57		MT:1719:G:A	Affx-79381658	0.083083	-0.00028491	0.00056544	0.61435	K57		MT:1719:G:A	Affx-79381658	0.083083	-0.0083037	NA	0.26305	0.60803	K57
MT:1721:C:T	Affx-79443409	0.026431	-0.0030644	0.0022088	0.16533	20002_1065		MT:1721:C:T	Affx-79443409	0.026431	-0.0030602	0.002209	0.16597	20002_1065		MT:1721:C:T	Affx-79443409	0.026431	-0.016935	NA	1.9072	0.16728	20002_1065
MT:1721:C:T	Affx-79443409	0.026431	-0.001205	0.00089483	0.1781	20002_1074		MT:1721:C:T	Affx-79443409	0.026431	-0.0012044	0.00089495	0.17838	20002_1074		MT:1721:C:T	Affx-79443409	0.026431	-0.041967	NA	1.8584	0.1728	20002_1074
MT:1721:C:T	Affx-79443409	0.026431	0.00036283	0.0014127	0.7973	20002_1465		MT:1721:C:T	Affx-79443409	0.026431	0.00036543	0.0014128	0.79589	20002_1465		MT:1721:C:T	Affx-79443409	0.026431	0.005426	NA	0.081236	0.77563	20002_1465
MT:1721:C:T	Affx-79443409	0.026431	-0.0042131	0.0016552	0.010917	20002_1473		MT:1721:C:T	Affx-79443409	0.026431	-0.0042083	0.0016555	0.01102	20002_1473		MT:1721:C:T	Affx-79443409	0.026431	-0.042342	NA	6.5318	0.010596	20002_1473
MT:1721:C:T	Affx-79443409	0.026431	-0.00016353	0.0011034	0.88218	2443		MT:1721:C:T	Affx-79443409	0.026431	-0.00016083	0.0011037	0.88415	2443		MT:1721:C:T	Affx-79443409	0.026431	-0.0029801	NA	0.014764	0.90329	2443
MT:1721:C:T	Affx-79443409	0.026431	-0.0057557	0.005053	0.25467	30650_irnt		MT:1721:C:T	Affx-79443409	0.026431	-0.0057563	0.005053	0.25462	30650_irnt		MT:1721:C:T	Affx-79443409	0.026431	-0.0057563	0.005053	NA	0.25462	30650_irnt
MT:1721:C:T	Affx-79443409	0.026431	-0.013647	0.0042814	0.0014355	30700_irnt		MT:1721:C:T	Affx-79443409	0.026431	-0.013644	0.0042815	0.0014386	30700_irnt		MT:1721:C:T	Affx-79443409	0.026431	-0.013644	0.0042815	NA	0.0014386	30700_irnt
MT:1721:C:T	Affx-79443409	0.026431	-0.0035917	0.0055162	0.51497	30740_irnt		MT:1721:C:T	Affx-79443409	0.026431	-0.003591	0.0055163	0.51505	30740_irnt		MT:1721:C:T	Affx-79443409	0.026431	-0.003591	0.0055163	NA	0.51505	30740_irnt
MT:1721:C:T	Affx-79443409	0.026431	-0.0031709	0.0050496	0.53004	30760_irnt		MT:1721:C:T	Affx-79443409	0.026431	-0.0031709	0.0050518	0.53021	30760_irnt		MT:1721:C:T	Affx-79443409	0.026431	-0.0031709	0.0050518	NA	0.53021	30760_irnt
MT:1721:C:T	Affx-79443409	0.026431	0.0029686	0.0052024	0.56825	30780_irnt		MT:1721:C:T	Affx-79443409	0.026431	0.0029708	0.0052024	0.56797	30780_irnt		MT:1721:C:T	Affx-79443409	0.026431	0.0029708	0.0052024	NA	0.56797	30780_irnt
MT:1721:C:T	Affx-79443409	0.026431	0.0040435	0.0051233	0.42997	30870_irnt		MT:1721:C:T	Affx-79443409	0.026431	0.0040351	0.005126	0.43118	30870_irnt		MT:1721:C:T	Affx-79443409	0.026431	0.0040351	0.005126	NA	0.43118	30870_irnt
MT:1721:C:T	Affx-79443409	0.026431	-0.003331	0.0066249	0.61511	3148_irnt		MT:1721:C:T	Affx-79443409	0.026431	-0.0033094	0.0066252	0.61741	3148_irnt		MT:1721:C:T	Affx-79443409	0.026431	-0.0033094	0.0066252	NA	0.61741	3148_irnt
MT:1721:C:T	Affx-79443409	0.026431	-0.00098927	0.00143	0.48905	3393		MT:1721:C:T	Affx-79443409	0.026431	-0.00098656	0.0014299	0.49024	3393		MT:1721:C:T	Affx-79443409	0.026431	-0.019581	NA	0.39412	0.53014	3393
MT:1721:C:T	Affx-79443409	0.026431	-0.0034359	0.0052359	0.51168	4079_irnt		MT:1721:C:T	Affx-79443409	0.026431	-0.0034322	0.005236	0.51214	4079_irnt		MT:1721:C:T	Affx-79443409	0.026431	-0.0034322	0.005236	NA	0.51214	4079_irnt
MT:1721:C:T	Affx-79443409	0.026431	-0.0012021	0.0049578	0.80841	4080_irnt		MT:1721:C:T	Affx-79443409	0.026431	-0.0012007	0.0049582	0.80865	4080_irnt		MT:1721:C:T	Affx-79443409	0.026431	-0.0012007	0.0049582	NA	0.80865	4080_irnt
MT:1721:C:T	Affx-79443409	0.026431	0.0011755	0.0010781	0.27555	C3_SKIN		MT:1721:C:T	Affx-79443409	0.026431	0.001175	0.0010781	0.27576	C3_SKIN		MT:1721:C:T	Affx-79443409	0.026431	0.027104	NA	1.2076	0.2718	C3_SKIN
MT:1721:C:T	Affx-79443409	0.026431	-2.8374e-05	0.00091918	0.97537	H26		MT:1721:C:T	Affx-79443409	0.026431	-2.8121e-05	0.00091918	0.97559	H26		MT:1721:C:T	Affx-79443409	0.026431	-0.0003601	NA	0.00015016	0.99022	H26
MT:1721:C:T	Affx-79443409	0.026431	-0.00055939	0.00069891	0.42349	I48		MT:1721:C:T	Affx-79443409	0.026431	-0.00055881	0.00069891	0.42397	I48		MT:1721:C:T	Affx-79443409	0.026431	-0.030333	NA	0.59757	0.43951	I48
MT:1721:C:T	Affx-79443409	0.026431	-0.0012997	0.00084994	0.12623	I9_CHD		MT:1721:C:T	Affx-79443409	0.026431	-0.0012974	0.00085005	0.12693	I9_CHD		MT:1721:C:T	Affx-79443409	0.026431	-0.050704	NA	2.4236	0.11952	I9_CHD
MT:1721:C:T	Affx-79443409	0.026431	-0.0014802	0.0011855	0.21182	I9_IHD		MT:1721:C:T	Affx-79443409	0.026431	-0.001478	0.0011857	0.21257	I9_IHD		MT:1721:C:T	Affx-79443409	0.026431	-0.02927	NA	1.614	0.20394	I9_IHD
MT:1721:C:T	Affx-79443409	0.026431	-0.0010698	0.00090461	0.23697	K21		MT:1721:C:T	Affx-79443409	0.026431	-0.0010688	0.00090462	0.23742	K21		MT:1721:C:T	Affx-79443409	0.026431	-0.035396	NA	1.3552	0.24437	K21
MT:1721:C:T	Affx-79443409	0.026431	0.00032908	0.00078433	0.6748	K44		MT:1721:C:T	Affx-79443409	0.026431	0.00032986	0.00078434	0.67408	K44		MT:1721:C:T	Affx-79443409	0.026431	0.015707	NA	0.21186	0.64531	K44
MT:1721:C:T	Affx-79443409	0.026431	-0.0015911	0.00097224	0.10174	K57		MT:1721:C:T	Affx-79443409	0.026431	-0.0015898	0.00097226	0.10201	K57		MT:1721:C:T	Affx-79443409	0.026431	-0.046845	NA	2.6979	0.10048	K57
MT:1736:A:G	Affx-79381659	0.0010906	-0.003624	0.011375	0.75003	20002_1065		MT:1736:A:G	Affx-79381659	0.0010906	-0.0036281	0.011376	0.74978	20002_1065		MT:1736:A:G	Affx-79381659	0.0010906	-0.017213	NA	0.074354	0.7851	20002_1065
MT:1736:A:G	Affx-79381659	0.0010906	-8.938e-05	0.007275	0.9902	20002_1465		MT:1736:A:G	Affx-79381659	0.0010906	-9.084e-05	0.0072755	0.99004	20002_1465		MT:1736:A:G	Affx-79381659	0.0010906	0.006483	NA	0.0045523	0.94621	20002_1465
MT:1736:A:G	Affx-79381659	0.0010906	-0.0066284	0.0085242	0.43681	20002_1473		MT:1736:A:G	Affx-79381659	0.0010906	-0.0066311	0.0085254	0.43669	20002_1473		MT:1736:A:G	Affx-79381659	0.0010906	-0.061549	NA	0.51781	0.47178	20002_1473
MT:1736:A:G	Affx-79381659	0.0010906	-0.023509	0.025992	0.36576	30650_irnt		MT:1736:A:G	Affx-79381659	0.0010906	-0.023509	0.025992	0.36575	30650_irnt		MT:1736:A:G	Affx-79381659	0.0010906	-0.023509	0.025992	NA	0.36575	30650_irnt
MT:1736:A:G	Affx-79381659	0.0010906	0.018608	0.022026	0.39822	30700_irnt		MT:1736:A:G	Affx-79381659	0.0010906	0.018612	0.022027	0.39814	30700_irnt		MT:1736:A:G	Affx-79381659	0.0010906	0.018612	0.022027	NA	0.39814	30700_irnt
MT:1736:A:G	Affx-79381659	0.0010906	-0.026554	0.028525	0.3519	30740_irnt		MT:1736:A:G	Affx-79381659	0.0010906	-0.026564	0.028525	0.35173	30740_irnt		MT:1736:A:G	Affx-79381659	0.0010906	-0.026564	0.028525	NA	0.35173	30740_irnt
MT:1736:A:G	Affx-79381659	0.0010906	0.0013876	0.026162	0.9577	30760_irnt		MT:1736:A:G	Affx-79381659	0.0010906	0.0014286	0.026174	0.95647	30760_irnt		MT:1736:A:G	Affx-79381659	0.0010906	0.0014286	0.026174	NA	0.95647	30760_irnt
MT:1736:A:G	Affx-79381659	0.0010906	-0.013303	0.026825	0.61996	30780_irnt		MT:1736:A:G	Affx-79381659	0.0010906	-0.0133	0.026825	0.62003	30780_irnt		MT:1736:A:G	Affx-79381659	0.0010906	-0.0133	0.026825	NA	0.62003	30780_irnt
MT:1736:A:G	Affx-79381659	0.0010906	-0.0041806	0.026391	0.87413	30870_irnt		MT:1736:A:G	Affx-79381659	0.0010906	-0.004198	0.026405	0.87368	30870_irnt		MT:1736:A:G	Affx-79381659	0.0010906	-0.004198	0.026405	NA	0.87368	30870_irnt
MT:1736:A:G	Affx-79381659	0.0010906	-0.038944	0.034505	0.25905	3148_irnt		MT:1736:A:G	Affx-79381659	0.0010906	-0.038928	0.034506	0.25927	3148_irnt		MT:1736:A:G	Affx-79381659	0.0010906	-0.038928	0.034506	NA	0.25927	3148_irnt
MT:1736:A:G	Affx-79381659	0.0010906	0.021329	0.02642	0.41949	4079_irnt		MT:1736:A:G	Affx-79381659	0.0010906	0.021331	0.02642	0.41945	4079_irnt		MT:1736:A:G	Affx-79381659	0.0010906	0.021331	0.02642	NA	0.41945	4079_irnt
MT:1736:A:G	Affx-79381659	0.0010906	0.022735	0.025016	0.36346	4080_irnt		MT:1736:A:G	Affx-79381659	0.0010906	0.022732	0.025018	0.36356	4080_irnt		MT:1736:A:G	Affx-79381659	0.0010906	0.022732	0.025018	NA	0.36356	4080_irnt
MT:1811:A:G	Affx-89025771	0.1298	0.0010091	0.0031888	0.75166	20002_1065		MT:1811:A:G	Affx-89025771	0.1298	0.0010088	0.0031891	0.75174	20002_1065		MT:1811:A:G	Affx-89025771	0.1298	0.0055781	NA	0.10148	0.75007	20002_1065
MT:1811:A:G	Affx-89025771	0.1298	0.00083488	0.0012918	0.5181	20002_1074		MT:1811:A:G	Affx-89025771	0.1298	0.00083475	0.001292	0.51822	20002_1074		MT:1811:A:G	Affx-89025771	0.1298	0.026915	NA	0.4148	0.51954	20002_1074
MT:1811:A:G	Affx-89025771	0.1298	-0.00066662	0.0020394	0.74377	20002_1465		MT:1811:A:G	Affx-89025771	0.1298	-0.00066671	0.0020395	0.74375	20002_1465		MT:1811:A:G	Affx-89025771	0.1298	-0.0076677	NA	0.075793	0.78308	20002_1465
MT:1811:A:G	Affx-89025771	0.1298	-0.0010831	0.0023896	0.65036	20002_1473		MT:1811:A:G	Affx-89025771	0.1298	-0.0010833	0.00239	0.65035	20002_1473		MT:1811:A:G	Affx-89025771	0.1298	-0.0099419	NA	0.1816	0.67	20002_1473
MT:1811:A:G	Affx-89025771	0.1298	-0.0005994	0.0015925	0.70663	2443		MT:1811:A:G	Affx-89025771	0.1298	-0.0005996	0.001593	0.70662	2443		MT:1811:A:G	Affx-89025771	0.1298	-0.01251	NA	0.12831	0.72019	2443
MT:1811:A:G	Affx-89025771	0.1298	0.0026539	0.0072813	0.7155	30650_irnt		MT:1811:A:G	Affx-89025771	0.1298	0.0026538	0.0072813	0.71551	30650_irnt		MT:1811:A:G	Affx-89025771	0.1298	0.0026538	0.0072813	NA	0.71551	30650_irnt
MT:1811:A:G	Affx-89025771	0.1298	-0.0014191	0.0061674	0.81802	30700_irnt		MT:1811:A:G	Affx-89025771	0.1298	-0.0014185	0.0061676	0.81809	30700_irnt		MT:1811:A:G	Affx-89025771	0.1298	-0.0014185	0.0061676	NA	0.81809	30700_irnt
MT:1811:A:G	Affx-89025771	0.1298	0.021267	0.0079194	0.007244	30740_irnt		MT:1811:A:G	Affx-89025771	0.1298	0.021267	0.0079196	0.0072455	30740_irnt		MT:1811:A:G	Affx-89025771	0.1298	0.021267	0.0079196	NA	0.0072455	30740_irnt
MT:1811:A:G	Affx-89025771	0.1298	-0.0036699	0.0072498	0.61271	30760_irnt		MT:1811:A:G	Affx-89025771	0.1298	-0.0036697	0.007253	0.61289	30760_irnt		MT:1811:A:G	Affx-89025771	0.1298	-0.0036697	0.007253	NA	0.61289	30760_irnt
MT:1811:A:G	Affx-89025771	0.1298	0.013909	0.007496	0.063513	30780_irnt		MT:1811:A:G	Affx-89025771	0.1298	0.01391	0.007496	0.063506	30780_irnt		MT:1811:A:G	Affx-89025771	0.1298	0.01391	0.007496	NA	0.063506	30780_irnt
MT:1811:A:G	Affx-89025771	0.1298	0.0091675	0.0073811	0.21423	30870_irnt		MT:1811:A:G	Affx-89025771	0.1298	0.0091656	0.007385	0.21457	30870_irnt		MT:1811:A:G	Affx-89025771	0.1298	0.0091656	0.007385	NA	0.21457	30870_irnt
MT:1811:A:G	Affx-89025771	0.1298	-0.0023918	0.0095648	0.80254	3148_irnt		MT:1811:A:G	Affx-89025771	0.1298	-0.00239	0.0095652	0.8027	3148_irnt		MT:1811:A:G	Affx-89025771	0.1298	-0.00239	0.0095652	NA	0.8027	3148_irnt
MT:1811:A:G	Affx-89025771	0.1298	0.0013874	0.0020661	0.50189	3393		MT:1811:A:G	Affx-89025771	0.1298	0.0013873	0.002066	0.50192	3393		MT:1811:A:G	Affx-89025771	0.1298	0.029429	NA	0.45037	0.50216	3393
MT:1811:A:G	Affx-89025771	0.1298	0.0010654	0.0075727	0.88812	4079_irnt		MT:1811:A:G	Affx-89025771	0.1298	0.0010656	0.0075728	0.8881	4079_irnt		MT:1811:A:G	Affx-89025771	0.1298	0.0010656	0.0075728	NA	0.8881	4079_irnt
MT:1811:A:G	Affx-89025771	0.1298	0.00147	0.0071705	0.83757	4080_irnt		MT:1811:A:G	Affx-89025771	0.1298	0.0014702	0.0071711	0.83756	4080_irnt		MT:1811:A:G	Affx-89025771	0.1298	0.0014702	0.0071711	NA	0.83756	4080_irnt
MT:1811:A:G	Affx-89025771	0.1298	8.0569e-05	0.0015565	0.95872	C3_SKIN		MT:1811:A:G	Affx-89025771	0.1298	8.0597e-05	0.0015565	0.9587	C3_SKIN		MT:1811:A:G	Affx-89025771	0.1298	0.0024864	NA	0.0048221	0.94464	C3_SKIN
MT:1811:A:G	Affx-89025771	0.1298	0.0002539	0.0013271	0.84827	H26		MT:1811:A:G	Affx-89025771	0.1298	0.00025389	0.001327	0.84827	H26		MT:1811:A:G	Affx-89025771	0.1298	0.0072632	NA	0.029466	0.86371	H26
MT:1811:A:G	Affx-89025771	0.1298	0.0029557	0.001009	0.0033979	I48		MT:1811:A:G	Affx-89025771	0.1298	0.0029557	0.001009	0.0033983	I48		MT:1811:A:G	Affx-89025771	0.1298	0.14195	NA	7.7763	0.0052937	I48
MT:1811:A:G	Affx-89025771	0.1298	0.0029703	0.0012271	0.015493	I9_CHD		MT:1811:A:G	Affx-89025771	0.1298	0.0029702	0.0012272	0.015509	I9_CHD		MT:1811:A:G	Affx-89025771	0.1298	0.098059	NA	5.3569	0.02064	I9_CHD
MT:1811:A:G	Affx-89025771	0.1298	0.0025779	0.0017115	0.132	I9_IHD		MT:1811:A:G	Affx-89025771	0.1298	0.0025778	0.0017118	0.1321	I9_IHD		MT:1811:A:G	Affx-89025771	0.1298	0.045687	NA	2.1295	0.14449	I9_IHD
MT:1811:A:G	Affx-89025771	0.1298	0.0015527	0.001306	0.23448	K21		MT:1811:A:G	Affx-89025771	0.1298	0.0015527	0.001306	0.2345	K21		MT:1811:A:G	Affx-89025771	0.1298	0.050538	NA	1.449	0.22869	K21
MT:1811:A:G	Affx-89025771	0.1298	-0.0015702	0.0011324	0.16554	K44		MT:1811:A:G	Affx-89025771	0.1298	-0.0015702	0.0011324	0.16554	K44		MT:1811:A:G	Affx-89025771	0.1298	-0.07068	NA	1.8828	0.17002	K44
MT:1811:A:G	Affx-89025771	0.1298	0.00027813	0.0014037	0.84293	K57		MT:1811:A:G	Affx-89025771	0.1298	0.00027808	0.0014037	0.84296	K57		MT:1811:A:G	Affx-89025771	0.1298	0.009217	NA	0.053647	0.81683	K57
MT:2158:T:C	Affx-34461927	0.014225	0.0034454	0.0031704	0.27716	20002_1065		MT:2158:T:C	Affx-34461927	0.014225	0.0034403	0.0031708	0.27792	20002_1065		MT:2158:T:C	Affx-34461927	0.014225	0.019394	NA	1.2314	0.26714	20002_1065
MT:2158:T:C	Affx-34461927	0.014225	0.0035462	0.0012844	0.0057618	20002_1074		MT:2158:T:C	Affx-34461927	0.014225	0.003543	0.0012846	0.0058133	20002_1074		MT:2158:T:C	Affx-34461927	0.014225	0.11232	NA	7.6259	0.0057537	20002_1074
MT:2158:T:C	Affx-34461927	0.014225	-0.0014195	0.0020277	0.48388	20002_1465		MT:2158:T:C	Affx-34461927	0.014225	-0.0014212	0.0020278	0.4834	20002_1465		MT:2158:T:C	Affx-34461927	0.014225	-0.017991	NA	0.42457	0.51467	20002_1465
MT:2158:T:C	Affx-34461927	0.014225	0.00059931	0.0023759	0.80085	20002_1473		MT:2158:T:C	Affx-34461927	0.014225	0.00059625	0.0023762	0.80187	20002_1473		MT:2158:T:C	Affx-34461927	0.014225	0.0064472	NA	0.075194	0.78392	20002_1473
MT:2158:T:C	Affx-34461927	0.014225	0.0028036	0.0015831	0.076567	2443		MT:2158:T:C	Affx-34461927	0.014225	0.0027988	0.0015836	0.077162	2443		MT:2158:T:C	Affx-34461927	0.014225	0.060932	NA	3.1637	0.075292	2443
MT:2158:T:C	Affx-34461927	0.014225	0.0051486	0.0072519	0.47773	30650_irnt		MT:2158:T:C	Affx-34461927	0.014225	0.005148	0.0072519	0.47777	30650_irnt		MT:2158:T:C	Affx-34461927	0.014225	0.005148	0.0072519	NA	0.47777	30650_irnt
MT:2158:T:C	Affx-34461927	0.014225	0.0052866	0.0061425	0.38943	30700_irnt		MT:2158:T:C	Affx-34461927	0.014225	0.0052907	0.0061427	0.38908	30700_irnt		MT:2158:T:C	Affx-34461927	0.014225	0.0052907	0.0061427	NA	0.38908	30700_irnt
MT:2158:T:C	Affx-34461927	0.014225	-0.0026142	0.0078901	0.7404	30740_irnt		MT:2158:T:C	Affx-34461927	0.014225	-0.0026178	0.0078903	0.74006	30740_irnt		MT:2158:T:C	Affx-34461927	0.014225	-0.0026178	0.0078903	NA	0.74006	30740_irnt
MT:2158:T:C	Affx-34461927	0.014225	-0.017721	0.0072226	0.014146	30760_irnt		MT:2158:T:C	Affx-34461927	0.014225	-0.017712	0.0072258	0.01424	30760_irnt		MT:2158:T:C	Affx-34461927	0.014225	-0.017712	0.0072258	NA	0.01424	30760_irnt
MT:2158:T:C	Affx-34461927	0.014225	-0.0064474	0.0074593	0.38739	30780_irnt		MT:2158:T:C	Affx-34461927	0.014225	-0.0064439	0.0074593	0.38765	30780_irnt		MT:2158:T:C	Affx-34461927	0.014225	-0.0064439	0.0074593	NA	0.38765	30780_irnt
MT:2158:T:C	Affx-34461927	0.014225	0.01229	0.0073503	0.094519	30870_irnt		MT:2158:T:C	Affx-34461927	0.014225	0.012273	0.0073542	0.095159	30870_irnt		MT:2158:T:C	Affx-34461927	0.014225	0.012273	0.0073542	NA	0.095159	30870_irnt
MT:2158:T:C	Affx-34461927	0.014225	0.012131	0.0095894	0.20586	3148_irnt		MT:2158:T:C	Affx-34461927	0.014225	0.012135	0.0095898	0.20574	3148_irnt		MT:2158:T:C	Affx-34461927	0.014225	0.012135	0.0095898	NA	0.20574	3148_irnt
MT:2158:T:C	Affx-34461927	0.014225	0.0017128	0.0020801	0.41028	3393		MT:2158:T:C	Affx-34461927	0.014225	0.0017131	0.0020801	0.41018	3393		MT:2158:T:C	Affx-34461927	0.014225	0.040619	NA	0.84446	0.35812	3393
MT:2158:T:C	Affx-34461927	0.014225	0.007951	0.0076596	0.29925	4079_irnt		MT:2158:T:C	Affx-34461927	0.014225	0.0079536	0.0076597	0.2991	4079_irnt		MT:2158:T:C	Affx-34461927	0.014225	0.0079536	0.0076597	NA	0.2991	4079_irnt
MT:2158:T:C	Affx-34461927	0.014225	0.0053316	0.0072528	0.46227	4080_irnt		MT:2158:T:C	Affx-34461927	0.014225	0.0053282	0.0072533	0.46259	4080_irnt		MT:2158:T:C	Affx-34461927	0.014225	0.0053282	0.0072533	NA	0.46259	4080_irnt
MT:2158:T:C	Affx-34461927	0.014225	-0.00015649	0.0015476	0.91946	C3_SKIN		MT:2158:T:C	Affx-34461927	0.014225	-0.00015602	0.0015476	0.9197	C3_SKIN		MT:2158:T:C	Affx-34461927	0.014225	-0.0020485	NA	0.0032603	0.95447	C3_SKIN
MT:2158:T:C	Affx-34461927	0.014225	-0.00029864	0.0013194	0.82094	H26		MT:2158:T:C	Affx-34461927	0.014225	-0.00029877	0.0013194	0.82086	H26		MT:2158:T:C	Affx-34461927	0.014225	-0.0081475	NA	0.037367	0.84672	H26
MT:2158:T:C	Affx-34461927	0.014225	-0.00069507	0.0010032	0.48841	I48		MT:2158:T:C	Affx-34461927	0.014225	-0.00069542	0.0010032	0.4882	I48		MT:2158:T:C	Affx-34461927	0.014225	-0.036765	NA	0.41111	0.52141	I48
MT:2158:T:C	Affx-34461927	0.014225	0.0033957	0.00122	0.0053802	I9_CHD		MT:2158:T:C	Affx-34461927	0.014225	0.0033943	0.0012202	0.0054059	I9_CHD		MT:2158:T:C	Affx-34461927	0.014225	0.11732	NA	7.59	0.0058694	I9_CHD
MT:2158:T:C	Affx-34461927	0.014225	0.0031058	0.0017017	0.067979	I9_IHD		MT:2158:T:C	Affx-34461927	0.014225	0.0031015	0.001702	0.068407	I9_IHD		MT:2158:T:C	Affx-34461927	0.014225	0.059696	NA	3.5208	0.060604	I9_IHD
MT:2158:T:C	Affx-34461927	0.014225	-0.0012045	0.0012985	0.35362	K21		MT:2158:T:C	Affx-34461927	0.014225	-0.001205	0.0012985	0.35341	K21		MT:2158:T:C	Affx-34461927	0.014225	-0.038948	NA	0.79058	0.37392	K21
MT:2158:T:C	Affx-34461927	0.014225	0.0014412	0.0011258	0.2005	K44		MT:2158:T:C	Affx-34461927	0.014225	0.0014408	0.0011259	0.20065	K44		MT:2158:T:C	Affx-34461927	0.014225	0.060789	NA	1.678	0.19519	K44
MT:2158:T:C	Affx-34461927	0.014225	-0.00043854	0.0013956	0.75334	K57		MT:2158:T:C	Affx-34461927	0.014225	-0.00043931	0.0013956	0.75293	K57		MT:2158:T:C	Affx-34461927	0.014225	-0.010076	NA	0.064592	0.79938	K57
MT:2218:C:T	Affx-89025695	0.00068577	0.012289	0.013535	0.3639	20002_1065		MT:2218:C:T	Affx-89025695	0.00068577	0.012302	0.013536	0.36343	20002_1065		MT:2218:C:T	Affx-89025695	0.00068577	0.068496	NA	0.87049	0.35082	20002_1065
MT:2218:C:T	Affx-89025695	0.00068577	-0.019512	0.0086564	0.024194	20002_1465		MT:2218:C:T	Affx-89025695	0.00068577	-0.019505	0.0086569	0.02425	20002_1465		MT:2218:C:T	Affx-89025695	0.00068577	-0.31985	NA	5.3522	0.020697	20002_1465
MT:2218:C:T	Affx-89025695	0.00068577	-0.0019298	0.010143	0.8491	20002_1473		MT:2218:C:T	Affx-89025695	0.00068577	-0.0019176	0.010144	0.85007	20002_1473		MT:2218:C:T	Affx-89025695	0.00068577	-0.011061	NA	0.012115	0.91235	20002_1473
MT:2218:C:T	Affx-89025695	0.00068577	0.028411	0.030687	0.35454	30650_irnt		MT:2218:C:T	Affx-89025695	0.00068577	0.028405	0.030687	0.35462	30650_irnt		MT:2218:C:T	Affx-89025695	0.00068577	0.028405	0.030687	NA	0.35462	30650_irnt
MT:2218:C:T	Affx-89025695	0.00068577	-0.022228	0.025988	0.39239	30700_irnt		MT:2218:C:T	Affx-89025695	0.00068577	-0.022235	0.025989	0.39225	30700_irnt		MT:2218:C:T	Affx-89025695	0.00068577	-0.022235	0.025989	NA	0.39225	30700_irnt
MT:2218:C:T	Affx-89025695	0.00068577	-0.029494	0.033702	0.38151	30740_irnt		MT:2218:C:T	Affx-89025695	0.00068577	-0.029601	0.033703	0.37979	30740_irnt		MT:2218:C:T	Affx-89025695	0.00068577	-0.029601	0.033703	NA	0.37979	30740_irnt
MT:2218:C:T	Affx-89025695	0.00068577	0.01536	0.030788	0.61784	30760_irnt		MT:2218:C:T	Affx-89025695	0.00068577	0.015799	0.030801	0.60799	30760_irnt		MT:2218:C:T	Affx-89025695	0.00068577	0.015799	0.030801	NA	0.60799	30760_irnt
MT:2218:C:T	Affx-89025695	0.00068577	0.007647	0.03149	0.80813	30780_irnt		MT:2218:C:T	Affx-89025695	0.00068577	0.0076471	0.03149	0.80813	30780_irnt		MT:2218:C:T	Affx-89025695	0.00068577	0.0076471	0.03149	NA	0.80813	30780_irnt
MT:2218:C:T	Affx-89025695	0.00068577	0.054986	0.031091	0.076975	30870_irnt		MT:2218:C:T	Affx-89025695	0.00068577	0.055019	0.031108	0.076949	30870_irnt		MT:2218:C:T	Affx-89025695	0.00068577	0.055019	0.031108	NA	0.076949	30870_irnt
MT:2218:C:T	Affx-89025695	0.00068577	-0.0028951	0.041868	0.94487	3148_irnt		MT:2218:C:T	Affx-89025695	0.00068577	-0.0029672	0.04187	0.9435	3148_irnt		MT:2218:C:T	Affx-89025695	0.00068577	-0.0029672	0.04187	NA	0.9435	3148_irnt
MT:2218:C:T	Affx-89025695	0.00068577	0.018732	0.031683	0.55436	4079_irnt		MT:2218:C:T	Affx-89025695	0.00068577	0.018742	0.031683	0.55415	4079_irnt		MT:2218:C:T	Affx-89025695	0.00068577	0.018742	0.031683	NA	0.55415	4079_irnt
MT:2218:C:T	Affx-89025695	0.00068577	-0.016476	0.03	0.58286	4080_irnt		MT:2218:C:T	Affx-89025695	0.00068577	-0.016456	0.030002	0.58336	4080_irnt		MT:2218:C:T	Affx-89025695	0.00068577	-0.016456	0.030002	NA	0.58336	4080_irnt
MT:2416:T:C	Affx-34461942	0.00060187	0.018897	0.01444	0.19064	20002_1065		MT:2416:T:C	Affx-34461942	0.00060187	0.018891	0.014441	0.19084	20002_1065		MT:2416:T:C	Affx-34461942	0.00060187	0.10526	NA	1.8124	0.17822	20002_1065
MT:2416:T:C	Affx-34461942	0.00060187	0.014991	0.010821	0.16595	20002_1473		MT:2416:T:C	Affx-34461942	0.00060187	0.014985	0.010822	0.16616	20002_1473		MT:2416:T:C	Affx-34461942	0.00060187	0.14732	NA	2.1156	0.1458	20002_1473
MT:2416:T:C	Affx-34461942	0.00060187	0.011892	0.033226	0.72041	30650_irnt		MT:2416:T:C	Affx-34461942	0.00060187	0.011866	0.033225	0.72099	30650_irnt		MT:2416:T:C	Affx-34461942	0.00060187	0.011866	0.033225	NA	0.72099	30650_irnt
MT:2416:T:C	Affx-34461942	0.00060187	-0.018941	0.028128	0.5007	30700_irnt		MT:2416:T:C	Affx-34461942	0.00060187	-0.019006	0.028129	0.49925	30700_irnt		MT:2416:T:C	Affx-34461942	0.00060187	-0.019006	0.028129	NA	0.49925	30700_irnt
MT:2416:T:C	Affx-34461942	0.00060187	0.02044	0.036246	0.57281	30740_irnt		MT:2416:T:C	Affx-34461942	0.00060187	0.02057	0.036247	0.57037	30740_irnt		MT:2416:T:C	Affx-34461942	0.00060187	0.02057	0.036247	NA	0.57037	30740_irnt
MT:2416:T:C	Affx-34461942	0.00060187	-0.047303	0.033279	0.1552	30760_irnt		MT:2416:T:C	Affx-34461942	0.00060187	-0.047847	0.033293	0.15068	30760_irnt		MT:2416:T:C	Affx-34461942	0.00060187	-0.047847	0.033293	NA	0.15068	30760_irnt
MT:2416:T:C	Affx-34461942	0.00060187	-0.018006	0.034238	0.59895	30780_irnt		MT:2416:T:C	Affx-34461942	0.00060187	-0.018033	0.034238	0.59841	30780_irnt		MT:2416:T:C	Affx-34461942	0.00060187	-0.018033	0.034238	NA	0.59841	30780_irnt
MT:2416:T:C	Affx-34461942	0.00060187	0.014181	0.033734	0.67421	30870_irnt		MT:2416:T:C	Affx-34461942	0.00060187	0.014515	0.033752	0.66715	30870_irnt		MT:2416:T:C	Affx-34461942	0.00060187	0.014515	0.033752	NA	0.66715	30870_irnt
MT:2416:T:C	Affx-34461942	0.00060187	-0.081665	0.044829	0.068505	3148_irnt		MT:2416:T:C	Affx-34461942	0.00060187	-0.081381	0.044831	0.069482	3148_irnt		MT:2416:T:C	Affx-34461942	0.00060187	-0.081381	0.044831	NA	0.069482	3148_irnt
MT:2416:T:C	Affx-34461942	0.00060187	-0.0062344	0.034208	0.85539	4079_irnt		MT:2416:T:C	Affx-34461942	0.00060187	-0.0062256	0.034209	0.85559	4079_irnt		MT:2416:T:C	Affx-34461942	0.00060187	-0.0062256	0.034209	NA	0.85559	4079_irnt
MT:2416:T:C	Affx-34461942	0.00060187	-0.030274	0.032391	0.34997	4080_irnt		MT:2416:T:C	Affx-34461942	0.00060187	-0.030259	0.032394	0.35026	4080_irnt		MT:2416:T:C	Affx-34461942	0.00060187	-0.030259	0.032394	NA	0.35026	4080_irnt
MT:2706:A:G	Affx-34461959	0.56081	-0.00018374	0.00071449	0.79706	20002_1065		MT:2706:A:G	Affx-34461959	0.56081	-0.00017844	0.00071457	0.8028	20002_1065		MT:2706:A:G	Affx-34461959	0.56081	-0.00093691	NA	0.056252	0.81252	20002_1065
MT:2706:A:G	Affx-34461959	0.56081	0.00012501	0.00028945	0.66584	20002_1074		MT:2706:A:G	Affx-34461959	0.56081	0.00012873	0.00028949	0.65656	20002_1074		MT:2706:A:G	Affx-34461959	0.56081	0.0048729	NA	0.24933	0.61754	20002_1074
MT:2706:A:G	Affx-34461959	0.56081	-0.00087456	0.00045696	0.05564	20002_1465		MT:2706:A:G	Affx-34461959	0.56081	-0.00087293	0.00045699	0.05611	20002_1465		MT:2706:A:G	Affx-34461959	0.56081	-0.011722	NA	3.6047	0.057616	20002_1465
MT:2706:A:G	Affx-34461959	0.56081	-0.00044508	0.00053543	0.40582	20002_1473		MT:2706:A:G	Affx-34461959	0.56081	-0.00044209	0.0005355	0.40905	20002_1473		MT:2706:A:G	Affx-34461959	0.56081	-0.004214	NA	0.63942	0.42392	20002_1473
MT:2706:A:G	Affx-34461959	0.56081	9.4645e-05	0.00035685	0.79084	2443		MT:2706:A:G	Affx-34461959	0.56081	9.9898e-05	0.00035695	0.77958	2443		MT:2706:A:G	Affx-34461959	0.56081	0.0023964	NA	0.091334	0.76249	2443
MT:2706:A:G	Affx-34461959	0.56081	0.0048423	0.0016315	0.0029974	30650_irnt		MT:2706:A:G	Affx-34461959	0.56081	0.0048428	0.0016315	0.002994	30650_irnt		MT:2706:A:G	Affx-34461959	0.56081	0.0048428	0.0016315	NA	0.002994	30650_irnt
MT:2706:A:G	Affx-34461959	0.56081	-0.0061825	0.0013823	7.7331e-06	30700_irnt		MT:2706:A:G	Affx-34461959	0.56081	-0.0061866	0.0013824	7.6323e-06	30700_irnt		MT:2706:A:G	Affx-34461959	0.56081	-0.0061866	0.0013824	NA	7.6323e-06	30700_irnt
MT:2706:A:G	Affx-34461959	0.56081	0.0020563	0.001773	0.24614	30740_irnt		MT:2706:A:G	Affx-34461959	0.56081	0.0020584	0.001773	0.24566	30740_irnt		MT:2706:A:G	Affx-34461959	0.56081	0.0020584	0.001773	NA	0.24566	30740_irnt
MT:2706:A:G	Affx-34461959	0.56081	-0.0011145	0.0016229	0.49227	30760_irnt		MT:2706:A:G	Affx-34461959	0.56081	-0.0011442	0.0016236	0.48099	30760_irnt		MT:2706:A:G	Affx-34461959	0.56081	-0.0011442	0.0016236	NA	0.48099	30760_irnt
MT:2706:A:G	Affx-34461959	0.56081	-0.0010385	0.0016797	0.53639	30780_irnt		MT:2706:A:G	Affx-34461959	0.56081	-0.001043	0.0016797	0.53464	30780_irnt		MT:2706:A:G	Affx-34461959	0.56081	-0.001043	0.0016797	NA	0.53464	30780_irnt
MT:2706:A:G	Affx-34461959	0.56081	0.0018032	0.0016541	0.27564	30870_irnt		MT:2706:A:G	Affx-34461959	0.56081	0.0018208	0.001655	0.27125	30870_irnt		MT:2706:A:G	Affx-34461959	0.56081	0.0018208	0.001655	NA	0.27125	30870_irnt
MT:2706:A:G	Affx-34461959	0.56081	-0.0010761	0.0021443	0.61579	3148_irnt		MT:2706:A:G	Affx-34461959	0.56081	-0.0010891	0.0021444	0.61153	3148_irnt		MT:2706:A:G	Affx-34461959	0.56081	-0.0010891	0.0021444	NA	0.61153	3148_irnt
MT:2706:A:G	Affx-34461959	0.56081	0.00038476	0.00046389	0.40687	3393		MT:2706:A:G	Affx-34461959	0.56081	0.00038329	0.00046389	0.40866	3393		MT:2706:A:G	Affx-34461959	0.56081	0.0085297	NA	0.72359	0.39497	3393
MT:2706:A:G	Affx-34461959	0.56081	-0.00087292	0.0016947	0.6065	4079_irnt		MT:2706:A:G	Affx-34461959	0.56081	-0.00087968	0.0016948	0.60372	4079_irnt		MT:2706:A:G	Affx-34461959	0.56081	-0.00087968	0.0016948	NA	0.60372	4079_irnt
MT:2706:A:G	Affx-34461959	0.56081	0.00084247	0.0016047	0.59959	4080_irnt		MT:2706:A:G	Affx-34461959	0.56081	0.00083894	0.0016049	0.60115	4080_irnt		MT:2706:A:G	Affx-34461959	0.56081	0.00083894	0.0016049	NA	0.60115	4080_irnt
MT:2706:A:G	Affx-34461959	0.56081	0.00018948	0.00034873	0.5869	C3_SKIN		MT:2706:A:G	Affx-34461959	0.56081	0.00018898	0.00034873	0.58788	C3_SKIN		MT:2706:A:G	Affx-34461959	0.56081	0.0043027	NA	0.28242	0.59512	C3_SKIN
MT:2706:A:G	Affx-34461959	0.56081	0.00047144	0.00029732	0.11283	H26		MT:2706:A:G	Affx-34461959	0.56081	0.00047155	0.00029732	0.11274	H26		MT:2706:A:G	Affx-34461959	0.56081	0.015077	NA	2.5155	0.11273	H26
MT:2706:A:G	Affx-34461959	0.56081	-0.00019065	0.00022607	0.39906	I48		MT:2706:A:G	Affx-34461959	0.56081	-0.0001903	0.00022607	0.39993	I48		MT:2706:A:G	Affx-34461959	0.56081	-0.010417	NA	0.69754	0.40361	I48
MT:2706:A:G	Affx-34461959	0.56081	0.00020556	0.00027493	0.45466	I9_CHD		MT:2706:A:G	Affx-34461959	0.56081	0.00020702	0.00027496	0.45151	I9_CHD		MT:2706:A:G	Affx-34461959	0.56081	0.0080053	NA	0.60719	0.43585	I9_CHD
MT:2706:A:G	Affx-34461959	0.56081	-0.00014542	0.00038346	0.70452	I9_IHD		MT:2706:A:G	Affx-34461959	0.56081	-0.00014072	0.00038353	0.7137	I9_IHD		MT:2706:A:G	Affx-34461959	0.56081	-0.0024913	NA	0.11458	0.73499	I9_IHD
MT:2706:A:G	Affx-34461959	0.56081	-1.2692e-05	0.00029261	0.9654	K21		MT:2706:A:G	Affx-34461959	0.56081	-1.217e-05	0.00029261	0.96683	K21		MT:2706:A:G	Affx-34461959	0.56081	-0.00035785	NA	0.0013789	0.97038	K21
MT:2706:A:G	Affx-34461959	0.56081	0.00014227	0.0002537	0.57495	K44		MT:2706:A:G	Affx-34461959	0.56081	0.00014273	0.00025371	0.57373	K44		MT:2706:A:G	Affx-34461959	0.56081	0.0062939	NA	0.31952	0.57189	K44
MT:2706:A:G	Affx-34461959	0.56081	7.2665e-05	0.00031449	0.81727	K57		MT:2706:A:G	Affx-34461959	0.56081	7.3425e-05	0.00031449	0.8154	K57		MT:2706:A:G	Affx-34461959	0.56081	0.0020781	NA	0.053569	0.81697	K57
MT:2758:G:A	Affx-34461963	0.00085956	-0.013648	0.012102	0.25943	20002_1065		MT:2758:G:A	Affx-34461963	0.00085956	-0.013636	0.012104	0.2599	20002_1065		MT:2758:G:A	Affx-34461963	0.00085956	-0.079853	NA	1.2985	0.25449	20002_1065
MT:2758:G:A	Affx-34461963	0.00085956	-0.0062703	0.0077402	0.41788	20002_1465		MT:2758:G:A	Affx-34461963	0.00085956	-0.0062641	0.0077406	0.41837	20002_1465		MT:2758:G:A	Affx-34461963	0.00085956	-0.096357	NA	0.6946	0.4046	20002_1465
MT:2758:G:A	Affx-34461963	0.00085956	-0.0014598	0.0090692	0.87212	20002_1473		MT:2758:G:A	Affx-34461963	0.00085956	-0.0014484	0.0090705	0.87313	20002_1473		MT:2758:G:A	Affx-34461963	0.00085956	-0.012444	NA	0.018021	0.89321	20002_1473
MT:2758:G:A	Affx-34461963	0.00085956	-0.072065	0.027519	0.0088256	30650_irnt		MT:2758:G:A	Affx-34461963	0.00085956	-0.072075	0.027519	0.0088158	30650_irnt		MT:2758:G:A	Affx-34461963	0.00085956	-0.072075	0.027519	NA	0.0088158	30650_irnt
MT:2758:G:A	Affx-34461963	0.00085956	-0.030604	0.023315	0.18931	30700_irnt		MT:2758:G:A	Affx-34461963	0.00085956	-0.030627	0.023316	0.189	30700_irnt		MT:2758:G:A	Affx-34461963	0.00085956	-0.030627	0.023316	NA	0.189	30700_irnt
MT:2758:G:A	Affx-34461963	0.00085956	0.024958	0.030176	0.40819	30740_irnt		MT:2758:G:A	Affx-34461963	0.00085956	0.024953	0.030176	0.40829	30740_irnt		MT:2758:G:A	Affx-34461963	0.00085956	0.024953	0.030176	NA	0.40829	30740_irnt
MT:2758:G:A	Affx-34461963	0.00085956	-0.012201	0.02763	0.65878	30760_irnt		MT:2758:G:A	Affx-34461963	0.00085956	-0.012178	0.027642	0.65953	30760_irnt		MT:2758:G:A	Affx-34461963	0.00085956	-0.012178	0.027642	NA	0.65953	30760_irnt
MT:2758:G:A	Affx-34461963	0.00085956	-0.060167	0.028406	0.034165	30780_irnt		MT:2758:G:A	Affx-34461963	0.00085956	-0.060177	0.028406	0.034134	30780_irnt		MT:2758:G:A	Affx-34461963	0.00085956	-0.060177	0.028406	NA	0.034134	30780_irnt
MT:2758:G:A	Affx-34461963	0.00085956	0.0026509	0.027894	0.92429	30870_irnt		MT:2758:G:A	Affx-34461963	0.00085956	0.0027564	0.027908	0.92132	30870_irnt		MT:2758:G:A	Affx-34461963	0.00085956	0.0027564	0.027908	NA	0.92132	30870_irnt
MT:2758:G:A	Affx-34461963	0.00085956	0.043183	0.035035	0.21775	3148_irnt		MT:2758:G:A	Affx-34461963	0.00085956	0.043076	0.035037	0.2189	3148_irnt		MT:2758:G:A	Affx-34461963	0.00085956	0.043076	0.035037	NA	0.2189	3148_irnt
MT:2758:G:A	Affx-34461963	0.00085956	-0.048156	0.028715	0.09354	4079_irnt		MT:2758:G:A	Affx-34461963	0.00085956	-0.048121	0.028716	0.093784	4079_irnt		MT:2758:G:A	Affx-34461963	0.00085956	-0.048121	0.028716	NA	0.093784	4079_irnt
MT:2758:G:A	Affx-34461963	0.00085956	-0.031192	0.02719	0.2513	4080_irnt		MT:2758:G:A	Affx-34461963	0.00085956	-0.031113	0.027192	0.25255	4080_irnt		MT:2758:G:A	Affx-34461963	0.00085956	-0.031113	0.027192	NA	0.25255	4080_irnt
MT:2885:T:C	Affx-34461972	0.001087	-0.010516	0.011389	0.35584	20002_1065		MT:2885:T:C	Affx-34461972	0.001087	-0.010507	0.01139	0.35629	20002_1065		MT:2885:T:C	Affx-34461972	0.001087	-0.061785	NA	0.86881	0.35128	20002_1065
MT:2885:T:C	Affx-34461972	0.001087	-0.006766	0.007284	0.35295	20002_1465		MT:2885:T:C	Affx-34461972	0.001087	-0.0067613	0.0072844	0.35331	20002_1465		MT:2885:T:C	Affx-34461972	0.001087	-0.11004	NA	0.97981	0.32225	20002_1465
MT:2885:T:C	Affx-34461972	0.001087	-0.003496	0.0085347	0.68208	20002_1473		MT:2885:T:C	Affx-34461972	0.001087	-0.0034874	0.0085359	0.68287	20002_1473		MT:2885:T:C	Affx-34461972	0.001087	-0.035296	NA	0.15493	0.69387	20002_1473
MT:2885:T:C	Affx-34461972	0.001087	-0.052995	0.025948	0.041119	30650_irnt		MT:2885:T:C	Affx-34461972	0.001087	-0.052999	0.025948	0.041102	30650_irnt		MT:2885:T:C	Affx-34461972	0.001087	-0.052999	0.025948	NA	0.041102	30650_irnt
MT:2885:T:C	Affx-34461972	0.001087	-0.046257	0.021989	0.035407	30700_irnt		MT:2885:T:C	Affx-34461972	0.001087	-0.046266	0.021989	0.035379	30700_irnt		MT:2885:T:C	Affx-34461972	0.001087	-0.046266	0.021989	NA	0.035379	30700_irnt
MT:2885:T:C	Affx-34461972	0.001087	0.02715	0.028377	0.33869	30740_irnt		MT:2885:T:C	Affx-34461972	0.001087	0.027159	0.028377	0.33855	30740_irnt		MT:2885:T:C	Affx-34461972	0.001087	0.027159	0.028377	NA	0.33855	30740_irnt
MT:2885:T:C	Affx-34461972	0.001087	-0.0015393	0.025983	0.95276	30760_irnt		MT:2885:T:C	Affx-34461972	0.001087	-0.0015696	0.025995	0.95185	30760_irnt		MT:2885:T:C	Affx-34461972	0.001087	-0.0015696	0.025995	NA	0.95185	30760_irnt
MT:2885:T:C	Affx-34461972	0.001087	-0.04091	0.02682	0.12717	30780_irnt		MT:2885:T:C	Affx-34461972	0.001087	-0.040911	0.02682	0.12715	30780_irnt		MT:2885:T:C	Affx-34461972	0.001087	-0.040911	0.02682	NA	0.12715	30780_irnt
MT:2885:T:C	Affx-34461972	0.001087	0.00048718	0.026306	0.98522	30870_irnt		MT:2885:T:C	Affx-34461972	0.001087	0.000526	0.02632	0.98406	30870_irnt		MT:2885:T:C	Affx-34461972	0.001087	0.000526	0.02632	NA	0.98406	30870_irnt
MT:2885:T:C	Affx-34461972	0.001087	0.049128	0.03325	0.13953	3148_irnt		MT:2885:T:C	Affx-34461972	0.001087	0.049119	0.033251	0.13962	3148_irnt		MT:2885:T:C	Affx-34461972	0.001087	0.049119	0.033251	NA	0.13962	3148_irnt
MT:2885:T:C	Affx-34461972	0.001087	-0.019856	0.027259	0.46635	4079_irnt		MT:2885:T:C	Affx-34461972	0.001087	-0.019848	0.027259	0.46654	4079_irnt		MT:2885:T:C	Affx-34461972	0.001087	-0.019848	0.027259	NA	0.46654	4079_irnt
MT:2885:T:C	Affx-34461972	0.001087	0.0058546	0.025811	0.82056	4080_irnt		MT:2885:T:C	Affx-34461972	0.001087	0.0058664	0.025813	0.82022	4080_irnt		MT:2885:T:C	Affx-34461972	0.001087	0.0058664	0.025813	NA	0.82022	4080_irnt
MT:3010:G:A	Affx-34461976	0.25914	-0.0016396	0.00080933	0.042773	20002_1065		MT:3010:G:A	Affx-34461976	0.25914	-0.0016362	0.00080941	0.043227	20002_1065		MT:3010:G:A	Affx-34461976	0.25914	-0.0090714	NA	4.0986	0.04292	20002_1065
MT:3010:G:A	Affx-34461976	0.25914	0.00018786	0.00032787	0.56667	20002_1074		MT:3010:G:A	Affx-34461976	0.25914	0.00018795	0.00032792	0.56653	20002_1074		MT:3010:G:A	Affx-34461976	0.25914	0.0066571	NA	0.36458	0.54597	20002_1074
MT:3010:G:A	Affx-34461976	0.25914	-0.00033579	0.00051762	0.51652	20002_1465		MT:3010:G:A	Affx-34461976	0.25914	-0.00033317	0.00051765	0.51982	20002_1465		MT:3010:G:A	Affx-34461976	0.25914	-0.0046566	NA	0.4418	0.50625	20002_1465
MT:3010:G:A	Affx-34461976	0.25914	-0.00015541	0.0006065	0.79776	20002_1473		MT:3010:G:A	Affx-34461976	0.25914	-0.00015068	0.00060659	0.80382	20002_1473		MT:3010:G:A	Affx-34461976	0.25914	-0.0015686	NA	0.068933	0.7929	20002_1473
MT:3010:G:A	Affx-34461976	0.25914	0.0004659	0.00040421	0.24907	2443		MT:3010:G:A	Affx-34461976	0.25914	0.00046814	0.00040433	0.24695	2443		MT:3010:G:A	Affx-34461976	0.25914	0.010395	NA	1.3466	0.24587	2443
MT:3010:G:A	Affx-34461976	0.25914	-0.0036432	0.0018478	0.048652	30650_irnt		MT:3010:G:A	Affx-34461976	0.25914	-0.003645	0.0018478	0.048542	30650_irnt		MT:3010:G:A	Affx-34461976	0.25914	-0.003645	0.0018478	NA	0.048542	30650_irnt
MT:3010:G:A	Affx-34461976	0.25914	0.0058487	0.0015656	0.00018717	30700_irnt		MT:3010:G:A	Affx-34461976	0.25914	0.0058467	0.0015656	0.00018821	30700_irnt		MT:3010:G:A	Affx-34461976	0.25914	0.0058467	0.0015656	NA	0.00018821	30700_irnt
MT:3010:G:A	Affx-34461976	0.25914	-0.003466	0.0020088	0.084453	30740_irnt		MT:3010:G:A	Affx-34461976	0.25914	-0.0034685	0.0020088	0.084241	30740_irnt		MT:3010:G:A	Affx-34461976	0.25914	-0.0034685	0.0020088	NA	0.084241	30740_irnt
MT:3010:G:A	Affx-34461976	0.25914	-0.00040231	0.0018387	0.8268	30760_irnt		MT:3010:G:A	Affx-34461976	0.25914	-0.00041758	0.0018394	0.82041	30760_irnt		MT:3010:G:A	Affx-34461976	0.25914	-0.00041758	0.0018394	NA	0.82041	30760_irnt
MT:3010:G:A	Affx-34461976	0.25914	-0.00068527	0.0019025	0.71869	30780_irnt		MT:3010:G:A	Affx-34461976	0.25914	-0.00068583	0.0019024	0.71847	30780_irnt		MT:3010:G:A	Affx-34461976	0.25914	-0.00068583	0.0019024	NA	0.71847	30780_irnt
MT:3010:G:A	Affx-34461976	0.25914	-0.0016256	0.0018734	0.38554	30870_irnt		MT:3010:G:A	Affx-34461976	0.25914	-0.0016037	0.0018744	0.39223	30870_irnt		MT:3010:G:A	Affx-34461976	0.25914	-0.0016037	0.0018744	NA	0.39223	30870_irnt
MT:3010:G:A	Affx-34461976	0.25914	0.0021025	0.0024247	0.38588	3148_irnt		MT:3010:G:A	Affx-34461976	0.25914	0.0020964	0.0024248	0.38728	3148_irnt		MT:3010:G:A	Affx-34461976	0.25914	0.0020964	0.0024248	NA	0.38728	3148_irnt
MT:3010:G:A	Affx-34461976	0.25914	2.8947e-05	0.00052675	0.95617	3393		MT:3010:G:A	Affx-34461976	0.25914	2.9054e-05	0.00052675	0.95601	3393		MT:3010:G:A	Affx-34461976	0.25914	0.00082049	NA	0.0052153	0.94243	3393
MT:3010:G:A	Affx-34461976	0.25914	0.00087079	0.0019221	0.65052	4079_irnt		MT:3010:G:A	Affx-34461976	0.25914	0.00088329	0.0019221	0.64585	4079_irnt		MT:3010:G:A	Affx-34461976	0.25914	0.00088329	0.0019221	NA	0.64585	4079_irnt
MT:3010:G:A	Affx-34461976	0.25914	-0.0013865	0.00182	0.44619	4080_irnt		MT:3010:G:A	Affx-34461976	0.25914	-0.0013619	0.0018202	0.45433	4080_irnt		MT:3010:G:A	Affx-34461976	0.25914	-0.0013619	0.0018202	NA	0.45433	4080_irnt
MT:3010:G:A	Affx-34461976	0.25914	-0.00074728	0.00039502	0.058525	C3_SKIN		MT:3010:G:A	Affx-34461976	0.25914	-0.00074786	0.00039502	0.058332	C3_SKIN		MT:3010:G:A	Affx-34461976	0.25914	-0.017268	NA	3.5159	0.060782	C3_SKIN
MT:3010:G:A	Affx-34461976	0.25914	6.8637e-05	0.00033679	0.83851	H26		MT:3010:G:A	Affx-34461976	0.25914	6.8833e-05	0.00033679	0.83806	H26		MT:3010:G:A	Affx-34461976	0.25914	0.0030391	NA	0.080015	0.77728	H26
MT:3010:G:A	Affx-34461976	0.25914	8.7036e-05	0.00025608	0.73395	I48		MT:3010:G:A	Affx-34461976	0.25914	8.7609e-05	0.00025608	0.73226	I48		MT:3010:G:A	Affx-34461976	0.25914	0.0050482	NA	0.1278	0.72072	I48
MT:3010:G:A	Affx-34461976	0.25914	-1.7698e-05	0.00031142	0.95468	I9_CHD		MT:3010:G:A	Affx-34461976	0.25914	-1.5429e-05	0.00031146	0.96049	I9_CHD		MT:3010:G:A	Affx-34461976	0.25914	-0.00039829	NA	0.0011739	0.97267	I9_CHD
MT:3010:G:A	Affx-34461976	0.25914	0.00016749	0.00043436	0.69978	I9_IHD		MT:3010:G:A	Affx-34461976	0.25914	0.00016914	0.00043444	0.69702	I9_IHD		MT:3010:G:A	Affx-34461976	0.25914	0.0034079	NA	0.16741	0.68242	I9_IHD
MT:3010:G:A	Affx-34461976	0.25914	-1.0132e-05	0.00033145	0.97561	K21		MT:3010:G:A	Affx-34461976	0.25914	-9.2623e-06	0.00033145	0.97771	K21		MT:3010:G:A	Affx-34461976	0.25914	-0.00027169	NA	0.000619	0.98015	K21
MT:3010:G:A	Affx-34461976	0.25914	0.00010393	0.00028738	0.71761	K44		MT:3010:G:A	Affx-34461976	0.25914	0.00010466	0.00028738	0.71571	K44		MT:3010:G:A	Affx-34461976	0.25914	0.004837	NA	0.14764	0.7008	K44
MT:3010:G:A	Affx-34461976	0.25914	-0.00026257	0.00035623	0.46107	K57		MT:3010:G:A	Affx-34461976	0.25914	-0.00026135	0.00035624	0.46317	K57		MT:3010:G:A	Affx-34461976	0.25914	-0.0071667	NA	0.49485	0.48177	K57
MT:3027:T:C	Affx-79443412	0.0010235	-0.017073	0.011107	0.12425	20002_1065		MT:3027:T:C	Affx-79443412	0.0010235	-0.017073	0.011108	0.1243	20002_1065		MT:3027:T:C	Affx-79443412	0.0010235	-0.097502	NA	2.3393	0.12614	20002_1065
MT:3027:T:C	Affx-79443412	0.0010235	-0.0020137	0.0071035	0.77681	20002_1465		MT:3027:T:C	Affx-79443412	0.0010235	-0.002013	0.0071039	0.77689	20002_1465		MT:3027:T:C	Affx-79443412	0.0010235	-0.019113	NA	0.038724	0.844	20002_1465
MT:3027:T:C	Affx-79443412	0.0010235	0.0067009	0.0083232	0.42077	20002_1473		MT:3027:T:C	Affx-79443412	0.0010235	0.0067021	0.0083244	0.42075	20002_1473		MT:3027:T:C	Affx-79443412	0.0010235	0.071431	NA	0.77236	0.37949	20002_1473
MT:3027:T:C	Affx-79443412	0.0010235	0.05412	0.024992	0.030354	30650_irnt		MT:3027:T:C	Affx-79443412	0.0010235	0.054119	0.024992	0.030357	30650_irnt		MT:3027:T:C	Affx-79443412	0.0010235	0.054119	0.024992	NA	0.030357	30650_irnt
MT:3027:T:C	Affx-79443412	0.0010235	-0.040123	0.021152	0.057839	30700_irnt		MT:3027:T:C	Affx-79443412	0.0010235	-0.040113	0.021152	0.057909	30700_irnt		MT:3027:T:C	Affx-79443412	0.0010235	-0.040113	0.021152	NA	0.057909	30700_irnt
MT:3027:T:C	Affx-79443412	0.0010235	-0.031809	0.02744	0.24636	30740_irnt		MT:3027:T:C	Affx-79443412	0.0010235	-0.031747	0.027441	0.2473	30740_irnt		MT:3027:T:C	Affx-79443412	0.0010235	-0.031747	0.027441	NA	0.2473	30740_irnt
MT:3027:T:C	Affx-79443412	0.0010235	0.00044057	0.025125	0.98601	30760_irnt		MT:3027:T:C	Affx-79443412	0.0010235	0.0001887	0.025136	0.99401	30760_irnt		MT:3027:T:C	Affx-79443412	0.0010235	0.0001887	0.025136	NA	0.99401	30760_irnt
MT:3027:T:C	Affx-79443412	0.0010235	-0.048424	0.025683	0.05937	30780_irnt		MT:3027:T:C	Affx-79443412	0.0010235	-0.048418	0.025683	0.059398	30780_irnt		MT:3027:T:C	Affx-79443412	0.0010235	-0.048418	0.025683	NA	0.059398	30780_irnt
MT:3027:T:C	Affx-79443412	0.0010235	-0.0099269	0.025305	0.69485	30870_irnt		MT:3027:T:C	Affx-79443412	0.0010235	-0.0099721	0.025318	0.69368	30870_irnt		MT:3027:T:C	Affx-79443412	0.0010235	-0.0099721	0.025318	NA	0.69368	30870_irnt
MT:3027:T:C	Affx-79443412	0.0010235	0.05413	0.033489	0.10603	3148_irnt		MT:3027:T:C	Affx-79443412	0.0010235	0.054234	0.033491	0.10537	3148_irnt		MT:3027:T:C	Affx-79443412	0.0010235	0.054234	0.033491	NA	0.10537	3148_irnt
MT:3027:T:C	Affx-79443412	0.0010235	-0.070417	0.02657	0.0080441	4079_irnt		MT:3027:T:C	Affx-79443412	0.0010235	-0.07037	0.02657	0.0080871	4079_irnt		MT:3027:T:C	Affx-79443412	0.0010235	-0.07037	0.02657	NA	0.0080871	4079_irnt
MT:3027:T:C	Affx-79443412	0.0010235	-0.066538	0.025159	0.0081767	4080_irnt		MT:3027:T:C	Affx-79443412	0.0010235	-0.066429	0.025161	0.0082864	4080_irnt		MT:3027:T:C	Affx-79443412	0.0010235	-0.066429	0.025161	NA	0.0082864	4080_irnt
MT:3027:T:C	Affx-79443412	0.0010235	-0.0043877	0.0059452	0.4605	I9_IHD		MT:3027:T:C	Affx-79443412	0.0010235	-0.0043927	0.0059462	0.46007	I9_IHD		MT:3027:T:C	Affx-79443412	0.0010235	-0.081978	NA	0.45071	0.502	I9_IHD
MT:3197:T:C	Affx-79381660	0.091455	-0.0036557	0.00123	0.0029574	20002_1065		MT:3197:T:C	Affx-79381660	0.091455	-0.0036381	0.0012301	0.0031017	20002_1065		MT:3197:T:C	Affx-79381660	0.091455	-0.020227	NA	8.7576	0.0030832	20002_1065
MT:3197:T:C	Affx-79381660	0.091455	-0.0013062	0.00049829	0.0087599	20002_1074		MT:3197:T:C	Affx-79381660	0.091455	-0.0013006	0.00049836	0.009062	20002_1074		MT:3197:T:C	Affx-79381660	0.091455	-0.04596	NA	7.1696	0.0074149	20002_1074
MT:3197:T:C	Affx-79381660	0.091455	-4.351e-05	0.00078667	0.95589	20002_1465		MT:3197:T:C	Affx-79381660	0.091455	-3.444e-05	0.00078671	0.96508	20002_1465		MT:3197:T:C	Affx-79381660	0.091455	-8.8916e-05	NA	6.9914e-05	0.99333	20002_1465
MT:3197:T:C	Affx-79381660	0.091455	-0.0021606	0.00092173	0.019078	20002_1473		MT:3197:T:C	Affx-79381660	0.091455	-0.0021438	0.00092187	0.020044	20002_1473		MT:3197:T:C	Affx-79381660	0.091455	-0.021402	NA	5.4696	0.01935	20002_1473
MT:3197:T:C	Affx-79381660	0.091455	-0.0011792	0.00061424	0.054891	2443		MT:3197:T:C	Affx-79381660	0.091455	-0.0011663	0.00061443	0.057682	2443		MT:3197:T:C	Affx-79381660	0.091455	-0.02632	NA	3.6228	0.056992	2443
MT:3197:T:C	Affx-79381660	0.091455	-0.00019835	0.0028108	0.94374	30650_irnt		MT:3197:T:C	Affx-79381660	0.091455	-0.00020622	0.0028108	0.94151	30650_irnt		MT:3197:T:C	Affx-79381660	0.091455	-0.00020622	0.0028108	NA	0.94151	30650_irnt
MT:3197:T:C	Affx-79381660	0.091455	-0.0099351	0.0023813	3.0192e-05	30700_irnt		MT:3197:T:C	Affx-79381660	0.091455	-0.0099536	0.0023814	2.9197e-05	30700_irnt		MT:3197:T:C	Affx-79381660	0.091455	-0.0099536	0.0023814	NA	2.9197e-05	30700_irnt
MT:3197:T:C	Affx-79381660	0.091455	-0.0040774	0.0030583	0.18246	30740_irnt		MT:3197:T:C	Affx-79381660	0.091455	-0.0040419	0.0030584	0.18631	30740_irnt		MT:3197:T:C	Affx-79381660	0.091455	-0.0040419	0.0030584	NA	0.18631	30740_irnt
MT:3197:T:C	Affx-79381660	0.091455	0.0010662	0.0027997	0.70333	30760_irnt		MT:3197:T:C	Affx-79381660	0.091455	0.00093015	0.0028009	0.73982	30760_irnt		MT:3197:T:C	Affx-79381660	0.091455	0.00093015	0.0028009	NA	0.73982	30760_irnt
MT:3197:T:C	Affx-79381660	0.091455	0.0053441	0.0028934	0.064746	30780_irnt		MT:3197:T:C	Affx-79381660	0.091455	0.0053381	0.0028934	0.065049	30780_irnt		MT:3197:T:C	Affx-79381660	0.091455	0.0053381	0.0028934	NA	0.065049	30780_irnt
MT:3197:T:C	Affx-79381660	0.091455	0.0019792	0.0028492	0.48728	30870_irnt		MT:3197:T:C	Affx-79381660	0.091455	0.0020684	0.0028507	0.46811	30870_irnt		MT:3197:T:C	Affx-79381660	0.091455	0.0020684	0.0028507	NA	0.46811	30870_irnt
MT:3197:T:C	Affx-79381660	0.091455	-0.0035989	0.0036988	0.33056	3148_irnt		MT:3197:T:C	Affx-79381660	0.091455	-0.0036105	0.0036989	0.32902	3148_irnt		MT:3197:T:C	Affx-79381660	0.091455	-0.0036105	0.0036989	NA	0.32902	3148_irnt
MT:3197:T:C	Affx-79381660	0.091455	-0.0013076	0.00079578	0.10034	3393		MT:3197:T:C	Affx-79381660	0.091455	-0.0013089	0.00079578	0.10002	3393		MT:3197:T:C	Affx-79381660	0.091455	-0.028775	NA	2.7175	0.099255	3393
MT:3197:T:C	Affx-79381660	0.091455	-0.001548	0.002917	0.59564	4079_irnt		MT:3197:T:C	Affx-79381660	0.091455	-0.0015372	0.0029171	0.59821	4079_irnt		MT:3197:T:C	Affx-79381660	0.091455	-0.0015372	0.0029171	NA	0.59821	4079_irnt
MT:3197:T:C	Affx-79381660	0.091455	0.001989	0.0027621	0.47147	4080_irnt		MT:3197:T:C	Affx-79381660	0.091455	0.0020076	0.0027623	0.46735	4080_irnt		MT:3197:T:C	Affx-79381660	0.091455	0.0020076	0.0027623	NA	0.46735	4080_irnt
MT:3197:T:C	Affx-79381660	0.091455	0.00044076	0.00060036	0.46285	C3_SKIN		MT:3197:T:C	Affx-79381660	0.091455	0.00043877	0.00060036	0.46487	C3_SKIN		MT:3197:T:C	Affx-79381660	0.091455	0.010087	NA	0.5295	0.46682	C3_SKIN
MT:3197:T:C	Affx-79381660	0.091455	-0.00014679	0.00051185	0.77428	H26		MT:3197:T:C	Affx-79381660	0.091455	-0.00014596	0.00051185	0.77553	H26		MT:3197:T:C	Affx-79381660	0.091455	-0.0049648	NA	0.091617	0.76213	H26
MT:3197:T:C	Affx-79381660	0.091455	-0.00078377	0.00038919	0.044025	I48		MT:3197:T:C	Affx-79381660	0.091455	-0.00078177	0.00038919	0.044568	I48		MT:3197:T:C	Affx-79381660	0.091455	-0.044474	NA	4.0862	0.043235	I48
MT:3197:T:C	Affx-79381660	0.091455	-0.00018262	0.0004733	0.69961	I9_CHD		MT:3197:T:C	Affx-79381660	0.091455	-0.0001748	0.00047335	0.71193	I9_CHD		MT:3197:T:C	Affx-79381660	0.091455	-0.0072407	NA	0.16679	0.68298	I9_CHD
MT:3197:T:C	Affx-79381660	0.091455	-0.00060456	0.00066014	0.35977	I9_IHD		MT:3197:T:C	Affx-79381660	0.091455	-0.00059362	0.00066026	0.36861	I9_IHD		MT:3197:T:C	Affx-79381660	0.091455	-0.012082	NA	0.89982	0.34283	I9_IHD
MT:3197:T:C	Affx-79381660	0.091455	4.1393e-05	0.00050374	0.93451	K21		MT:3197:T:C	Affx-79381660	0.091455	4.4765e-05	0.00050374	0.92919	K21		MT:3197:T:C	Affx-79381660	0.091455	0.0017121	NA	0.010671	0.91772	K21
MT:3197:T:C	Affx-79381660	0.091455	-0.00032387	0.00043676	0.45837	K44		MT:3197:T:C	Affx-79381660	0.091455	-0.00032122	0.00043676	0.46206	K44		MT:3197:T:C	Affx-79381660	0.091455	-0.014	NA	0.52812	0.4674	K44
MT:3197:T:C	Affx-79381660	0.091455	-0.00056876	0.0005414	0.29347	K57		MT:3197:T:C	Affx-79381660	0.091455	-0.00056453	0.00054141	0.29709	K57		MT:3197:T:C	Affx-79381660	0.091455	-0.016399	NA	1.1113	0.29181	K57
MT:3308:T:G	Affx-89025737	0.0022971	-0.0085327	0.0073993	0.24884	20002_1065		MT:3308:T:G	Affx-89025737	0.0022971	-0.0084943	0.0074001	0.25103	20002_1065		MT:3308:T:G	Affx-89025737	0.0022971	-0.047176	NA	1.2925	0.2556	20002_1065
MT:3308:T:G	Affx-89025737	0.0022971	-0.0055349	0.0029976	0.064826	20002_1074		MT:3308:T:G	Affx-89025737	0.0022971	-0.005521	0.002998	0.06554	20002_1074		MT:3308:T:G	Affx-89025737	0.0022971	-0.20782	NA	3.3065	0.069008	20002_1074
MT:3308:T:G	Affx-89025737	0.0022971	-0.0078294	0.0047323	0.098039	20002_1465		MT:3308:T:G	Affx-89025737	0.0022971	-0.0078106	0.0047326	0.098865	20002_1465		MT:3308:T:G	Affx-89025737	0.0022971	-0.11449	NA	2.8096	0.093704	20002_1465
MT:3308:T:G	Affx-89025737	0.0022971	-0.0066391	0.0055449	0.23118	20002_1473		MT:3308:T:G	Affx-89025737	0.0022971	-0.0066046	0.0055457	0.23368	20002_1473		MT:3308:T:G	Affx-89025737	0.0022971	-0.065208	NA	1.3577	0.24394	20002_1473
MT:3308:T:G	Affx-89025737	0.0022971	-3.7573e-05	0.0036907	0.99188	2443		MT:3308:T:G	Affx-89025737	0.0022971	-7.9602e-06	0.0036918	0.99828	2443		MT:3308:T:G	Affx-89025737	0.0022971	0.0067313	NA	0.0068339	0.93412	2443
MT:3308:T:G	Affx-89025737	0.0022971	-0.013319	0.016966	0.43243	30650_irnt		MT:3308:T:G	Affx-89025737	0.0022971	-0.013349	0.016966	0.43138	30650_irnt		MT:3308:T:G	Affx-89025737	0.0022971	-0.013349	0.016966	NA	0.43138	30650_irnt
MT:3308:T:G	Affx-89025737	0.0022971	-0.015265	0.014344	0.28724	30700_irnt		MT:3308:T:G	Affx-89025737	0.0022971	-0.015342	0.014344	0.28481	30700_irnt		MT:3308:T:G	Affx-89025737	0.0022971	-0.015342	0.014344	NA	0.28481	30700_irnt
MT:3308:T:G	Affx-89025737	0.0022971	0.021868	0.01834	0.23311	30740_irnt		MT:3308:T:G	Affx-89025737	0.0022971	0.021935	0.01834	0.23169	30740_irnt		MT:3308:T:G	Affx-89025737	0.0022971	0.021935	0.01834	NA	0.23169	30740_irnt
MT:3308:T:G	Affx-89025737	0.0022971	6.9646e-05	0.016805	0.99669	30760_irnt		MT:3308:T:G	Affx-89025737	0.0022971	-0.00019832	0.016812	0.99059	30760_irnt		MT:3308:T:G	Affx-89025737	0.0022971	-0.00019832	0.016812	NA	0.99059	30760_irnt
MT:3308:T:G	Affx-89025737	0.0022971	-0.0070645	0.01745	0.68559	30780_irnt		MT:3308:T:G	Affx-89025737	0.0022971	-0.0070954	0.01745	0.68429	30780_irnt		MT:3308:T:G	Affx-89025737	0.0022971	-0.0070954	0.01745	NA	0.68429	30780_irnt
MT:3308:T:G	Affx-89025737	0.0022971	0.018569	0.01716	0.27921	30870_irnt		MT:3308:T:G	Affx-89025737	0.0022971	0.018932	0.017169	0.27018	30870_irnt		MT:3308:T:G	Affx-89025737	0.0022971	0.018932	0.017169	NA	0.27018	30870_irnt
MT:3308:T:G	Affx-89025737	0.0022971	0.047977	0.022176	0.030502	3148_irnt		MT:3308:T:G	Affx-89025737	0.0022971	0.047799	0.022176	0.031134	3148_irnt		MT:3308:T:G	Affx-89025737	0.0022971	0.047799	0.022176	NA	0.031134	3148_irnt
MT:3308:T:G	Affx-89025737	0.0022971	-0.0081143	0.0047472	0.087401	3393		MT:3308:T:G	Affx-89025737	0.0022971	-0.0081164	0.0047472	0.087318	3393		MT:3308:T:G	Affx-89025737	0.0022971	-0.19051	NA	2.8489	0.091435	3393
MT:3308:T:G	Affx-89025737	0.0022971	-0.0079642	0.01761	0.65109	4079_irnt		MT:3308:T:G	Affx-89025737	0.0022971	-0.0079345	0.017611	0.65231	4079_irnt		MT:3308:T:G	Affx-89025737	0.0022971	-0.0079345	0.017611	NA	0.65231	4079_irnt
MT:3308:T:G	Affx-89025737	0.0022971	0.0034815	0.016675	0.83462	4080_irnt		MT:3308:T:G	Affx-89025737	0.0022971	0.0035504	0.016676	0.83141	4080_irnt		MT:3308:T:G	Affx-89025737	0.0022971	0.0035504	0.016676	NA	0.83141	4080_irnt
MT:3308:T:G	Affx-89025737	0.0022971	0.0038634	0.0036118	0.28477	C3_SKIN		MT:3308:T:G	Affx-89025737	0.0022971	0.0038592	0.0036118	0.2853	C3_SKIN		MT:3308:T:G	Affx-89025737	0.0022971	0.088936	NA	1.2421	0.26508	C3_SKIN
MT:3308:T:G	Affx-89025737	0.0022971	0.00040849	0.0030793	0.89447	H26		MT:3308:T:G	Affx-89025737	0.0022971	0.00041021	0.0030793	0.89403	H26		MT:3308:T:G	Affx-89025737	0.0022971	0.021581	NA	0.049261	0.82435	H26
MT:3308:T:G	Affx-89025737	0.0022971	0.0038617	0.0028474	0.17502	I9_CHD		MT:3308:T:G	Affx-89025737	0.0022971	0.003878	0.0028477	0.17327	I9_CHD		MT:3308:T:G	Affx-89025737	0.0022971	0.13752	NA	1.9936	0.15797	I9_CHD
MT:3308:T:G	Affx-89025737	0.0022971	0.0033517	0.0039714	0.39869	I9_IHD		MT:3308:T:G	Affx-89025737	0.0022971	0.0033768	0.0039722	0.39526	I9_IHD		MT:3308:T:G	Affx-89025737	0.0022971	0.067435	NA	0.84979	0.35661	I9_IHD
MT:3308:T:G	Affx-89025737	0.0022971	0.0043163	0.0030305	0.15437	K21		MT:3308:T:G	Affx-89025737	0.0022971	0.0043232	0.0030305	0.15371	K21		MT:3308:T:G	Affx-89025737	0.0022971	0.13426	NA	2.1258	0.14483	K21
MT:3308:T:G	Affx-89025737	0.0022971	-0.00037075	0.0032571	0.90937	K57		MT:3308:T:G	Affx-89025737	0.0022971	-0.00036198	0.0032572	0.91151	K57		MT:3308:T:G	Affx-89025737	0.0022971	-0.0033501	NA	0.0012623	0.97166	K57
MT:3316:G:A	Affx-89025707	0.0023574	0.017686	0.0073073	0.015506	20002_1065		MT:3316:G:A	Affx-89025707	0.0023574	0.017661	0.0073081	0.015663	20002_1065		MT:3316:G:A	Affx-89025707	0.0023574	0.095978	NA	5.8583	0.015504	20002_1065
MT:3316:G:A	Affx-89025707	0.0023574	0.0033693	0.0029603	0.25507	20002_1074		MT:3316:G:A	Affx-89025707	0.0023574	0.003359	0.0029607	0.25658	20002_1074		MT:3316:G:A	Affx-89025707	0.0023574	0.11574	NA	1.5091	0.21928	20002_1074
MT:3316:G:A	Affx-89025707	0.0023574	-0.0055593	0.0046736	0.23424	20002_1465		MT:3316:G:A	Affx-89025707	0.0023574	-0.0055708	0.0046738	0.23329	20002_1465		MT:3316:G:A	Affx-89025707	0.0023574	-0.07621	NA	1.3609	0.24338	20002_1465
MT:3316:G:A	Affx-89025707	0.0023574	0.0029484	0.005476	0.59028	20002_1473		MT:3316:G:A	Affx-89025707	0.0023574	0.0029272	0.0054768	0.59302	20002_1473		MT:3316:G:A	Affx-89025707	0.0023574	0.031041	NA	0.33352	0.56359	20002_1473
MT:3316:G:A	Affx-89025707	0.0023574	0.0020148	0.0036491	0.58087	2443		MT:3316:G:A	Affx-89025707	0.0023574	0.001996	0.0036502	0.5845	2443		MT:3316:G:A	Affx-89025707	0.0023574	0.049366	NA	0.38356	0.53571	2443
MT:3316:G:A	Affx-89025707	0.0023574	-0.0014476	0.01664	0.93067	30650_irnt		MT:3316:G:A	Affx-89025707	0.0023574	-0.0014444	0.01664	0.93083	30650_irnt		MT:3316:G:A	Affx-89025707	0.0023574	-0.0014444	0.01664	NA	0.93083	30650_irnt
MT:3316:G:A	Affx-89025707	0.0023574	0.012151	0.014113	0.38926	30700_irnt		MT:3316:G:A	Affx-89025707	0.0023574	0.012166	0.014113	0.38868	30700_irnt		MT:3316:G:A	Affx-89025707	0.0023574	0.012166	0.014113	NA	0.38868	30700_irnt
MT:3316:G:A	Affx-89025707	0.0023574	0.028512	0.018154	0.11628	30740_irnt		MT:3316:G:A	Affx-89025707	0.0023574	0.028522	0.018154	0.11616	30740_irnt		MT:3316:G:A	Affx-89025707	0.0023574	0.028522	0.018154	NA	0.11616	30740_irnt
MT:3316:G:A	Affx-89025707	0.0023574	-0.015904	0.016633	0.33899	30760_irnt		MT:3316:G:A	Affx-89025707	0.0023574	-0.015951	0.016641	0.33778	30760_irnt		MT:3316:G:A	Affx-89025707	0.0023574	-0.015951	0.016641	NA	0.33778	30760_irnt
MT:3316:G:A	Affx-89025707	0.0023574	-0.014069	0.017147	0.41191	30780_irnt		MT:3316:G:A	Affx-89025707	0.0023574	-0.014063	0.017147	0.41212	30780_irnt		MT:3316:G:A	Affx-89025707	0.0023574	-0.014063	0.017147	NA	0.41212	30780_irnt
MT:3316:G:A	Affx-89025707	0.0023574	0.011322	0.016894	0.50277	30870_irnt		MT:3316:G:A	Affx-89025707	0.0023574	0.011257	0.016903	0.50542	30870_irnt		MT:3316:G:A	Affx-89025707	0.0023574	0.011257	0.016903	NA	0.50542	30870_irnt
MT:3316:G:A	Affx-89025707	0.0023574	-0.032173	0.021723	0.13858	3148_irnt		MT:3316:G:A	Affx-89025707	0.0023574	-0.032135	0.021723	0.13907	3148_irnt		MT:3316:G:A	Affx-89025707	0.0023574	-0.032135	0.021723	NA	0.13907	3148_irnt
MT:3316:G:A	Affx-89025707	0.0023574	-0.0023674	0.0047381	0.61732	3393		MT:3316:G:A	Affx-89025707	0.0023574	-0.0023634	0.0047381	0.61792	3393		MT:3316:G:A	Affx-89025707	0.0023574	-0.042577	NA	0.16283	0.68656	3393
MT:3316:G:A	Affx-89025707	0.0023574	0.014144	0.01728	0.41304	4079_irnt		MT:3316:G:A	Affx-89025707	0.0023574	0.014146	0.01728	0.41299	4079_irnt		MT:3316:G:A	Affx-89025707	0.0023574	0.014146	0.01728	NA	0.41299	4079_irnt
MT:3316:G:A	Affx-89025707	0.0023574	0.01026	0.016362	0.5306	4080_irnt		MT:3316:G:A	Affx-89025707	0.0023574	0.010258	0.016363	0.53072	4080_irnt		MT:3316:G:A	Affx-89025707	0.0023574	0.010258	0.016363	NA	0.53072	4080_irnt
MT:3316:G:A	Affx-89025707	0.0023574	0.00057883	0.0035669	0.87109	C3_SKIN		MT:3316:G:A	Affx-89025707	0.0023574	0.0005815	0.0035669	0.8705	C3_SKIN		MT:3316:G:A	Affx-89025707	0.0023574	0.019494	NA	0.056979	0.81134	C3_SKIN
MT:3316:G:A	Affx-89025707	0.0023574	0.0038492	0.0030411	0.20561	H26		MT:3316:G:A	Affx-89025707	0.0023574	0.0038482	0.0030411	0.20573	H26		MT:3316:G:A	Affx-89025707	0.0023574	0.11884	NA	1.7354	0.18772	H26
MT:3316:G:A	Affx-89025707	0.0023574	0.00063101	0.002812	0.82245	I9_CHD		MT:3316:G:A	Affx-89025707	0.0023574	0.00062107	0.0028124	0.82522	I9_CHD		MT:3316:G:A	Affx-89025707	0.0023574	0.035513	NA	0.11451	0.73506	I9_CHD
MT:3316:G:A	Affx-89025707	0.0023574	0.0032435	0.0039221	0.40824	I9_IHD		MT:3316:G:A	Affx-89025707	0.0023574	0.0032266	0.0039228	0.41078	I9_IHD		MT:3316:G:A	Affx-89025707	0.0023574	0.066986	NA	0.82284	0.36435	I9_IHD
MT:3316:G:A	Affx-89025707	0.0023574	-0.0005831	0.0029929	0.84553	K21		MT:3316:G:A	Affx-89025707	0.0023574	-0.00058726	0.0029929	0.84444	K21		MT:3316:G:A	Affx-89025707	0.0023574	-0.010119	NA	0.010527	0.91828	K21
MT:3316:G:A	Affx-89025707	0.0023574	-0.0017705	0.0032166	0.58203	K57		MT:3316:G:A	Affx-89025707	0.0023574	-0.0017758	0.0032167	0.58091	K57		MT:3316:G:A	Affx-89025707	0.0023574	-0.04349	NA	0.21819	0.64042	K57
MT:3348:A:G	Affx-34461994	0.00173	-0.0040787	0.0085334	0.63267	20002_1065		MT:3348:A:G	Affx-34461994	0.00173	-0.0041155	0.0085343	0.62964	20002_1065		MT:3348:A:G	Affx-34461994	0.00173	-0.022812	NA	0.23011	0.63144	20002_1065
MT:3348:A:G	Affx-34461994	0.00173	-0.0056466	0.0054577	0.30085	20002_1465		MT:3348:A:G	Affx-34461994	0.00173	-0.0056636	0.005458	0.29942	20002_1465		MT:3348:A:G	Affx-34461994	0.00173	-0.077759	NA	1.0126	0.31427	20002_1465
MT:3348:A:G	Affx-34461994	0.00173	0.010135	0.0063948	0.113	20002_1473		MT:3348:A:G	Affx-34461994	0.00173	0.010103	0.0063957	0.11417	20002_1473		MT:3348:A:G	Affx-34461994	0.00173	0.09592	NA	2.5222	0.11225	20002_1473
MT:3348:A:G	Affx-34461994	0.00173	0.00016321	0.0042563	0.96941	2443		MT:3348:A:G	Affx-34461994	0.00173	0.00013299	0.0042576	0.97508	2443		MT:3348:A:G	Affx-34461994	0.00173	0.010388	NA	0.012247	0.91188	2443
MT:3348:A:G	Affx-34461994	0.00173	-0.019719	0.019321	0.30745	30650_irnt		MT:3348:A:G	Affx-34461994	0.00173	-0.019697	0.019321	0.30798	30650_irnt		MT:3348:A:G	Affx-34461994	0.00173	-0.019697	0.019321	NA	0.30798	30650_irnt
MT:3348:A:G	Affx-34461994	0.00173	0.0013437	0.01641	0.93474	30700_irnt		MT:3348:A:G	Affx-34461994	0.00173	0.0014128	0.016411	0.9314	30700_irnt		MT:3348:A:G	Affx-34461994	0.00173	0.0014128	0.016411	NA	0.9314	30700_irnt
MT:3348:A:G	Affx-34461994	0.00173	-0.020136	0.021034	0.3384	30740_irnt		MT:3348:A:G	Affx-34461994	0.00173	-0.020222	0.021034	0.33634	30740_irnt		MT:3348:A:G	Affx-34461994	0.00173	-0.020222	0.021034	NA	0.33634	30740_irnt
MT:3348:A:G	Affx-34461994	0.00173	-0.013997	0.019259	0.46737	30760_irnt		MT:3348:A:G	Affx-34461994	0.00173	-0.013657	0.019268	0.47844	30760_irnt		MT:3348:A:G	Affx-34461994	0.00173	-0.013657	0.019268	NA	0.47844	30760_irnt
MT:3348:A:G	Affx-34461994	0.00173	0.020769	0.019909	0.29686	30780_irnt		MT:3348:A:G	Affx-34461994	0.00173	0.020799	0.019909	0.29618	30780_irnt		MT:3348:A:G	Affx-34461994	0.00173	0.020799	0.019909	NA	0.29618	30780_irnt
MT:3348:A:G	Affx-34461994	0.00173	0.028648	0.019616	0.14418	30870_irnt		MT:3348:A:G	Affx-34461994	0.00173	0.028314	0.019627	0.14914	30870_irnt		MT:3348:A:G	Affx-34461994	0.00173	0.028314	0.019627	NA	0.14914	30870_irnt
MT:3348:A:G	Affx-34461994	0.00173	-0.021971	0.025859	0.39552	3148_irnt		MT:3348:A:G	Affx-34461994	0.00173	-0.021993	0.02586	0.39506	3148_irnt		MT:3348:A:G	Affx-34461994	0.00173	-0.021993	0.02586	NA	0.39506	3148_irnt
MT:3348:A:G	Affx-34461994	0.00173	0.017404	0.020243	0.38995	4079_irnt		MT:3348:A:G	Affx-34461994	0.00173	0.017391	0.020244	0.39029	4079_irnt		MT:3348:A:G	Affx-34461994	0.00173	0.017391	0.020244	NA	0.39029	4079_irnt
MT:3348:A:G	Affx-34461994	0.00173	0.0099	0.019168	0.60552	4080_irnt		MT:3348:A:G	Affx-34461994	0.00173	0.0098595	0.01917	0.60702	4080_irnt		MT:3348:A:G	Affx-34461994	0.00173	0.0098595	0.01917	NA	0.60702	4080_irnt
MT:3348:A:G	Affx-34461994	0.00173	0.0096116	0.0041653	0.021027	C3_SKIN		MT:3348:A:G	Affx-34461994	0.00173	0.0096155	0.0041653	0.020974	C3_SKIN		MT:3348:A:G	Affx-34461994	0.00173	0.19512	NA	5.0678	0.024374	C3_SKIN
MT:3348:A:G	Affx-34461994	0.00173	-0.0041845	0.0035513	0.23868	H26		MT:3348:A:G	Affx-34461994	0.00173	-0.0041861	0.0035513	0.2385	H26		MT:3348:A:G	Affx-34461994	0.00173	-0.14515	NA	1.3622	0.24316	H26
MT:3348:A:G	Affx-34461994	0.00173	-0.0047306	0.0045801	0.30167	I9_IHD		MT:3348:A:G	Affx-34461994	0.00173	-0.0047558	0.004581	0.2992	I9_IHD		MT:3348:A:G	Affx-34461994	0.00173	-0.094123	NA	1.0424	0.30727	I9_IHD
MT:3348:A:G	Affx-34461994	0.00173	0.0012942	0.0037563	0.73043	K57		MT:3348:A:G	Affx-34461994	0.00173	0.0012863	0.0037564	0.73203	K57		MT:3348:A:G	Affx-34461994	0.00173	0.042328	NA	0.1621	0.68723	K57
MT:3394:T:C	Affx-34461996	0.01465	0.0037404	0.0031261	0.23151	20002_1065		MT:3394:T:C	Affx-34461996	0.01465	0.0037337	0.0031265	0.2324	20002_1065		MT:3394:T:C	Affx-34461996	0.01465	0.020653	NA	1.4513	0.22832	20002_1065
MT:3394:T:C	Affx-34461996	0.01465	0.001115	0.0012665	0.37864	20002_1074		MT:3394:T:C	Affx-34461996	0.01465	0.0011114	0.0012666	0.38024	20002_1074		MT:3394:T:C	Affx-34461996	0.01465	0.038067	NA	0.84379	0.35831	20002_1074
MT:3394:T:C	Affx-34461996	0.01465	-0.00070411	0.0019994	0.72472	20002_1465		MT:3394:T:C	Affx-34461996	0.01465	-0.00070678	0.0019995	0.72373	20002_1465		MT:3394:T:C	Affx-34461996	0.01465	-0.0089078	NA	0.11057	0.7395	20002_1465
MT:3394:T:C	Affx-34461996	0.01465	0.0018975	0.0023427	0.41795	20002_1473		MT:3394:T:C	Affx-34461996	0.01465	0.0018926	0.002343	0.41923	20002_1473		MT:3394:T:C	Affx-34461996	0.01465	0.018703	NA	0.67447	0.4115	20002_1473
MT:3394:T:C	Affx-34461996	0.01465	-0.0002192	0.0015608	0.88831	2443		MT:3394:T:C	Affx-34461996	0.01465	-0.00022513	0.0015612	0.88534	2443		MT:3394:T:C	Affx-34461996	0.01465	-0.0038957	NA	0.01258	0.9107	2443
MT:3394:T:C	Affx-34461996	0.01465	-0.0060371	0.0071342	0.39743	30650_irnt		MT:3394:T:C	Affx-34461996	0.01465	-0.0060365	0.0071342	0.39748	30650_irnt		MT:3394:T:C	Affx-34461996	0.01465	-0.0060365	0.0071342	NA	0.39748	30650_irnt
MT:3394:T:C	Affx-34461996	0.01465	0.014465	0.0060431	0.016679	30700_irnt		MT:3394:T:C	Affx-34461996	0.01465	0.014472	0.0060433	0.016634	30700_irnt		MT:3394:T:C	Affx-34461996	0.01465	0.014472	0.0060433	NA	0.016634	30700_irnt
MT:3394:T:C	Affx-34461996	0.01465	-0.011698	0.0077645	0.13192	30740_irnt		MT:3394:T:C	Affx-34461996	0.01465	-0.011703	0.0077646	0.13176	30740_irnt		MT:3394:T:C	Affx-34461996	0.01465	-0.011703	0.0077646	NA	0.13176	30740_irnt
MT:3394:T:C	Affx-34461996	0.01465	-0.0030055	0.0071061	0.67234	30760_irnt		MT:3394:T:C	Affx-34461996	0.01465	-0.002986	0.0071092	0.67447	30760_irnt		MT:3394:T:C	Affx-34461996	0.01465	-0.002986	0.0071092	NA	0.67447	30760_irnt
MT:3394:T:C	Affx-34461996	0.01465	-0.0046839	0.0073435	0.52358	30780_irnt		MT:3394:T:C	Affx-34461996	0.01465	-0.0046798	0.0073435	0.52394	30780_irnt		MT:3394:T:C	Affx-34461996	0.01465	-0.0046798	0.0073435	NA	0.52394	30780_irnt
MT:3394:T:C	Affx-34461996	0.01465	0.0018899	0.0072322	0.79385	30870_irnt		MT:3394:T:C	Affx-34461996	0.01465	0.0018603	0.007236	0.79711	30870_irnt		MT:3394:T:C	Affx-34461996	0.01465	0.0018603	0.007236	NA	0.79711	30870_irnt
MT:3394:T:C	Affx-34461996	0.01465	-0.0025096	0.0092773	0.78677	3148_irnt		MT:3394:T:C	Affx-34461996	0.01465	-0.0025035	0.0092776	0.78728	3148_irnt		MT:3394:T:C	Affx-34461996	0.01465	-0.0025035	0.0092776	NA	0.78728	3148_irnt
MT:3394:T:C	Affx-34461996	0.01465	0.00016088	0.0020542	0.93757	3393		MT:3394:T:C	Affx-34461996	0.01465	0.00016162	0.0020542	0.93729	3393		MT:3394:T:C	Affx-34461996	0.01465	0.0044541	NA	0.010382	0.91884	3393
MT:3394:T:C	Affx-34461996	0.01465	0.013428	0.0074327	0.070834	4079_irnt		MT:3394:T:C	Affx-34461996	0.01465	0.013427	0.0074329	0.070843	4079_irnt		MT:3394:T:C	Affx-34461996	0.01465	0.013427	0.0074329	NA	0.070843	4079_irnt
MT:3394:T:C	Affx-34461996	0.01465	0.0092463	0.007038	0.18892	4080_irnt		MT:3394:T:C	Affx-34461996	0.01465	0.0092377	0.0070385	0.18937	4080_irnt		MT:3394:T:C	Affx-34461996	0.01465	0.0092377	0.0070385	NA	0.18937	4080_irnt
MT:3394:T:C	Affx-34461996	0.01465	0.0028157	0.0015259	0.065002	C3_SKIN		MT:3394:T:C	Affx-34461996	0.01465	0.0028164	0.0015259	0.064937	C3_SKIN		MT:3394:T:C	Affx-34461996	0.01465	0.062034	NA	3.3479	0.06729	C3_SKIN
MT:3394:T:C	Affx-34461996	0.01465	0.0012087	0.001301	0.35285	H26		MT:3394:T:C	Affx-34461996	0.01465	0.0012085	0.001301	0.35294	H26		MT:3394:T:C	Affx-34461996	0.01465	0.038529	NA	0.92176	0.33701	H26
MT:3394:T:C	Affx-34461996	0.01465	-0.00040354	0.00098922	0.68332	I48		MT:3394:T:C	Affx-34461996	0.01465	-0.00040412	0.00098923	0.68289	I48		MT:3394:T:C	Affx-34461996	0.01465	-0.019783	NA	0.1282	0.7203	I48
MT:3394:T:C	Affx-34461996	0.01465	0.00058123	0.001203	0.62898	I9_CHD		MT:3394:T:C	Affx-34461996	0.01465	0.00057889	0.0012031	0.63041	I9_CHD		MT:3394:T:C	Affx-34461996	0.01465	0.023654	NA	0.286	0.5928	I9_CHD
MT:3394:T:C	Affx-34461996	0.01465	0.00051705	0.0016779	0.75797	I9_IHD		MT:3394:T:C	Affx-34461996	0.01465	0.00051188	0.0016782	0.76035	I9_IHD		MT:3394:T:C	Affx-34461996	0.01465	0.010922	NA	0.11687	0.73245	I9_IHD
MT:3394:T:C	Affx-34461996	0.01465	-0.0002559	0.0012804	0.84158	K21		MT:3394:T:C	Affx-34461996	0.01465	-0.00025684	0.0012804	0.84101	K21		MT:3394:T:C	Affx-34461996	0.01465	-0.0068546	NA	0.026501	0.87068	K21
MT:3394:T:C	Affx-34461996	0.01465	-0.0015044	0.0011101	0.17535	K44		MT:3394:T:C	Affx-34461996	0.01465	-0.0015052	0.0011101	0.17514	K44		MT:3394:T:C	Affx-34461996	0.01465	-0.064707	NA	1.6911	0.19346	K44
MT:3394:T:C	Affx-34461996	0.01465	0.00070632	0.0013761	0.60775	K57		MT:3394:T:C	Affx-34461996	0.01465	0.00070508	0.0013761	0.6084	K57		MT:3394:T:C	Affx-34461996	0.01465	0.021407	NA	0.31269	0.57604	K57
MT:3480:A:G	Affx-79381661	0.08661	5.4778e-05	0.0012598	0.96532	20002_1065		MT:3480:A:G	Affx-79381661	0.08661	3.5335e-05	0.0012599	0.97763	20002_1065		MT:3480:A:G	Affx-79381661	0.08661	0.00026343	NA	0.0014286	0.96985	20002_1065
MT:3480:A:G	Affx-79381661	0.08661	4.4168e-05	0.00051036	0.93104	20002_1074		MT:3480:A:G	Affx-79381661	0.08661	3.5703e-05	0.00051043	0.94424	20002_1074		MT:3480:A:G	Affx-79381661	0.08661	0.0013182	NA	0.0058788	0.93888	20002_1074
MT:3480:A:G	Affx-79381661	0.08661	0.00041941	0.00080572	0.60268	20002_1465		MT:3480:A:G	Affx-79381661	0.08661	0.00041065	0.00080576	0.61031	20002_1465		MT:3480:A:G	Affx-79381661	0.08661	0.0057127	NA	0.27545	0.5997	20002_1465
MT:3480:A:G	Affx-79381661	0.08661	-0.0012378	0.00094406	0.18981	20002_1473		MT:3480:A:G	Affx-79381661	0.08661	-0.0012539	0.0009442	0.18417	20002_1473		MT:3480:A:G	Affx-79381661	0.08661	-0.012297	NA	1.7306	0.18834	20002_1473
MT:3480:A:G	Affx-79381661	0.08661	-0.00072832	0.00062915	0.24702	2443		MT:3480:A:G	Affx-79381661	0.08661	-0.00074428	0.00062933	0.23695	2443		MT:3480:A:G	Affx-79381661	0.08661	-0.016581	NA	1.3838	0.23945	2443
MT:3480:A:G	Affx-79381661	0.08661	0.00013219	0.002877	0.96335	30650_irnt		MT:3480:A:G	Affx-79381661	0.08661	0.00013719	0.002877	0.96197	30650_irnt		MT:3480:A:G	Affx-79381661	0.08661	0.00013719	0.002877	NA	0.96197	30650_irnt
MT:3480:A:G	Affx-79381661	0.08661	-0.0020765	0.0024379	0.39434	30700_irnt		MT:3480:A:G	Affx-79381661	0.08661	-0.0020562	0.0024379	0.39899	30700_irnt		MT:3480:A:G	Affx-79381661	0.08661	-0.0020562	0.0024379	NA	0.39899	30700_irnt
MT:3480:A:G	Affx-79381661	0.08661	0.0074374	0.0031273	0.017397	30740_irnt		MT:3480:A:G	Affx-79381661	0.08661	0.0074194	0.0031274	0.017673	30740_irnt		MT:3480:A:G	Affx-79381661	0.08661	0.0074194	0.0031274	NA	0.017673	30740_irnt
MT:3480:A:G	Affx-79381661	0.08661	-0.0026724	0.0028627	0.35055	30760_irnt		MT:3480:A:G	Affx-79381661	0.08661	-0.0026052	0.0028639	0.363	30760_irnt		MT:3480:A:G	Affx-79381661	0.08661	-0.0026052	0.0028639	NA	0.363	30760_irnt
MT:3480:A:G	Affx-79381661	0.08661	-0.0010346	0.0029623	0.72691	30780_irnt		MT:3480:A:G	Affx-79381661	0.08661	-0.0010252	0.0029623	0.72929	30780_irnt		MT:3480:A:G	Affx-79381661	0.08661	-0.0010252	0.0029623	NA	0.72929	30780_irnt
MT:3480:A:G	Affx-79381661	0.08661	0.0013285	0.0029173	0.64884	30870_irnt		MT:3480:A:G	Affx-79381661	0.08661	0.0012308	0.0029188	0.67327	30870_irnt		MT:3480:A:G	Affx-79381661	0.08661	0.0012308	0.0029188	NA	0.67327	30870_irnt
MT:3480:A:G	Affx-79381661	0.08661	0.0026132	0.0037871	0.49018	3148_irnt		MT:3480:A:G	Affx-79381661	0.08661	0.0026284	0.0037872	0.48767	3148_irnt		MT:3480:A:G	Affx-79381661	0.08661	0.0026284	0.0037872	NA	0.48767	3148_irnt
MT:3480:A:G	Affx-79381661	0.08661	0.0015803	0.00081751	0.053233	3393		MT:3480:A:G	Affx-79381661	0.08661	0.0015811	0.00081749	0.053105	3393		MT:3480:A:G	Affx-79381661	0.08661	0.033623	NA	3.7128	0.053997	3393
MT:3480:A:G	Affx-79381661	0.08661	0.0023201	0.0029911	0.43795	4079_irnt		MT:3480:A:G	Affx-79381661	0.08661	0.0023119	0.0029912	0.43957	4079_irnt		MT:3480:A:G	Affx-79381661	0.08661	0.0023119	0.0029912	NA	0.43957	4079_irnt
MT:3480:A:G	Affx-79381661	0.08661	0.00067067	0.0028323	0.81281	4080_irnt		MT:3480:A:G	Affx-79381661	0.08661	0.00064184	0.0028325	0.82073	4080_irnt		MT:3480:A:G	Affx-79381661	0.08661	0.00064184	0.0028325	NA	0.82073	4080_irnt
MT:3480:A:G	Affx-79381661	0.08661	5.7929e-05	0.00061488	0.92494	C3_SKIN		MT:3480:A:G	Affx-79381661	0.08661	6.0011e-05	0.00061488	0.92225	C3_SKIN		MT:3480:A:G	Affx-79381661	0.08661	0.0013199	NA	0.0085367	0.92638	C3_SKIN
MT:3480:A:G	Affx-79381661	0.08661	-7.7486e-05	0.00052424	0.88249	H26		MT:3480:A:G	Affx-79381661	0.08661	-7.826e-05	0.00052424	0.88133	H26		MT:3480:A:G	Affx-79381661	0.08661	-0.0025878	NA	0.023721	0.8776	H26
MT:3480:A:G	Affx-79381661	0.08661	0.00019166	0.00039861	0.63064	I48		MT:3480:A:G	Affx-79381661	0.08661	0.00018974	0.00039861	0.63407	I48		MT:3480:A:G	Affx-79381661	0.08661	0.010721	NA	0.23962	0.62448	I48
MT:3480:A:G	Affx-79381661	0.08661	0.00040253	0.00048475	0.40632	I9_CHD		MT:3480:A:G	Affx-79381661	0.08661	0.00039489	0.00048481	0.41534	I9_CHD		MT:3480:A:G	Affx-79381661	0.08661	0.014681	NA	0.66877	0.41348	I9_CHD
MT:3480:A:G	Affx-79381661	0.08661	-3.3006e-06	0.00067611	0.99611	I9_IHD		MT:3480:A:G	Affx-79381661	0.08661	-1.6963e-05	0.00067623	0.97999	I9_IHD		MT:3480:A:G	Affx-79381661	0.08661	-0.00035031	NA	0.00072968	0.97845	I9_IHD
MT:3480:A:G	Affx-79381661	0.08661	0.00029884	0.00051592	0.56244	K21		MT:3480:A:G	Affx-79381661	0.08661	0.00029566	0.00051593	0.5666	K21		MT:3480:A:G	Affx-79381661	0.08661	0.0098553	NA	0.33972	0.55999	K21
MT:3480:A:G	Affx-79381661	0.08661	0.00020597	0.00044732	0.6452	K44		MT:3480:A:G	Affx-79381661	0.08661	0.00020343	0.00044733	0.64928	K44		MT:3480:A:G	Affx-79381661	0.08661	0.0091011	NA	0.21791	0.64064	K44
MT:3480:A:G	Affx-79381661	0.08661	-3.1648e-05	0.0005545	0.95448	K57		MT:3480:A:G	Affx-79381661	0.08661	-3.5739e-05	0.00055451	0.94861	K57		MT:3480:A:G	Affx-79381661	0.08661	-0.0011282	NA	0.0050783	0.94319	K57
MT:3531:G:A	Affx-89025718	0.0051137	0.0026622	0.0049714	0.5923	20002_1065		MT:3531:G:A	Affx-89025718	0.0051137	0.0028599	0.0049706	0.56505	20002_1065		MT:3531:G:A	Affx-89025718	0.0051137	0.015743	NA	0.33332	0.56371	20002_1065
MT:3531:G:A	Affx-89025718	0.0051137	0.0040612	0.002014	0.04375	20002_1074		MT:3531:G:A	Affx-89025718	0.0051137	0.0043203	0.0020137	0.031921	20002_1074		MT:3531:G:A	Affx-89025718	0.0051137	0.13067	NA	4.4028	0.03588	20002_1074
MT:3531:G:A	Affx-89025718	0.0051137	0.0067529	0.0031795	0.033683	20002_1465		MT:3531:G:A	Affx-89025718	0.0051137	0.0067317	0.0031789	0.034205	20002_1465		MT:3531:G:A	Affx-89025718	0.0051137	0.084515	NA	4.3007	0.038097	20002_1465
MT:3531:G:A	Affx-89025718	0.0051137	0.0066963	0.0037255	0.072269	20002_1473		MT:3531:G:A	Affx-89025718	0.0051137	0.0066636	0.003725	0.073637	20002_1473		MT:3531:G:A	Affx-89025718	0.0051137	0.063605	NA	3.1932	0.073946	20002_1473
MT:3531:G:A	Affx-89025718	0.0051137	0.0031814	0.002481	0.19975	2443		MT:3531:G:A	Affx-89025718	0.0051137	0.0034359	0.0024811	0.1661	2443		MT:3531:G:A	Affx-89025718	0.0051137	0.074063	NA	1.9719	0.16025	2443
MT:3531:G:A	Affx-89025718	0.0051137	0.0067509	0.011368	0.5526	30650_irnt		MT:3531:G:A	Affx-89025718	0.0051137	0.006926	0.011364	0.54223	30650_irnt		MT:3531:G:A	Affx-89025718	0.0051137	0.006926	0.011364	NA	0.54223	30650_irnt
MT:3531:G:A	Affx-89025718	0.0051137	-0.0045137	0.0096363	0.63949	30700_irnt		MT:3531:G:A	Affx-89025718	0.0051137	-0.0047131	0.0096339	0.62469	30700_irnt		MT:3531:G:A	Affx-89025718	0.0051137	-0.0047131	0.0096339	NA	0.62469	30700_irnt
MT:3531:G:A	Affx-89025718	0.0051137	-0.005998	0.012356	0.62737	30740_irnt		MT:3531:G:A	Affx-89025718	0.0051137	-0.0059666	0.012356	0.62918	30740_irnt		MT:3531:G:A	Affx-89025718	0.0051137	-0.0059666	0.012356	NA	0.62918	30740_irnt
MT:3531:G:A	Affx-89025718	0.0051137	0.0018828	0.011307	0.86775	30760_irnt		MT:3531:G:A	Affx-89025718	0.0051137	0.0017585	0.011312	0.87646	30760_irnt		MT:3531:G:A	Affx-89025718	0.0051137	0.0017585	0.011312	NA	0.87646	30760_irnt
MT:3531:G:A	Affx-89025718	0.0051137	-0.0050914	0.011694	0.66328	30780_irnt		MT:3531:G:A	Affx-89025718	0.0051137	-0.0053865	0.011691	0.64497	30780_irnt		MT:3531:G:A	Affx-89025718	0.0051137	-0.0053865	0.011691	NA	0.64497	30780_irnt
MT:3531:G:A	Affx-89025718	0.0051137	0.0042194	0.011525	0.71429	30870_irnt		MT:3531:G:A	Affx-89025718	0.0051137	0.0045888	0.011528	0.69059	30870_irnt		MT:3531:G:A	Affx-89025718	0.0051137	0.0045888	0.011528	NA	0.69059	30870_irnt
MT:3531:G:A	Affx-89025718	0.0051137	0.0058092	0.014672	0.69216	3148_irnt		MT:3531:G:A	Affx-89025718	0.0051137	0.0058758	0.014673	0.68883	3148_irnt		MT:3531:G:A	Affx-89025718	0.0051137	0.0058758	0.014673	NA	0.68883	3148_irnt
MT:3531:G:A	Affx-89025718	0.0051137	0.00067292	0.003268	0.83686	3393		MT:3531:G:A	Affx-89025718	0.0051137	0.0006594	0.003268	0.84009	3393		MT:3531:G:A	Affx-89025718	0.0051137	0.016113	NA	0.053445	0.81717	3393
MT:3531:G:A	Affx-89025718	0.0051137	-0.0062131	0.011829	0.59943	4079_irnt		MT:3531:G:A	Affx-89025718	0.0051137	-0.0069333	0.011826	0.5577	4079_irnt		MT:3531:G:A	Affx-89025718	0.0051137	-0.0069333	0.011826	NA	0.5577	4079_irnt
MT:3531:G:A	Affx-89025718	0.0051137	-0.0077119	0.011201	0.49114	4080_irnt		MT:3531:G:A	Affx-89025718	0.0051137	-0.0081714	0.011199	0.46559	4080_irnt		MT:3531:G:A	Affx-89025718	0.0051137	-0.0081714	0.011199	NA	0.46559	4080_irnt
MT:3531:G:A	Affx-89025718	0.0051137	0.0019129	0.0024267	0.43052	C3_SKIN		MT:3531:G:A	Affx-89025718	0.0051137	0.001905	0.002426	0.43232	C3_SKIN		MT:3531:G:A	Affx-89025718	0.0051137	0.045006	NA	0.67908	0.4099	C3_SKIN
MT:3531:G:A	Affx-89025718	0.0051137	0.0010739	0.0020689	0.60371	H26		MT:3531:G:A	Affx-89025718	0.0051137	0.0010711	0.0020684	0.60458	H26		MT:3531:G:A	Affx-89025718	0.0051137	0.037026	NA	0.32357	0.56947	H26
MT:3531:G:A	Affx-89025718	0.0051137	0.002903	0.0015731	0.064987	I48		MT:3531:G:A	Affx-89025718	0.0051137	0.0028968	0.0015727	0.065484	I48		MT:3531:G:A	Affx-89025718	0.0051137	0.14631	NA	3.4032	0.06507	I48
MT:3531:G:A	Affx-89025718	0.0051137	0.0010815	0.0019131	0.57184	I9_CHD		MT:3531:G:A	Affx-89025718	0.0051137	0.0010702	0.0019128	0.57584	I9_CHD		MT:3531:G:A	Affx-89025718	0.0051137	0.040979	NA	0.3545	0.55158	I9_CHD
MT:3531:G:A	Affx-89025718	0.0051137	0.0046701	0.0026683	0.080081	I9_IHD		MT:3531:G:A	Affx-89025718	0.0051137	0.0049194	0.0026681	0.065215	I9_IHD		MT:3531:G:A	Affx-89025718	0.0051137	0.08816	NA	3.3037	0.069123	I9_IHD
MT:3531:G:A	Affx-89025718	0.0051137	0.0003386	0.0020361	0.86792	K21		MT:3531:G:A	Affx-89025718	0.0051137	0.00032942	0.0020356	0.87144	K21		MT:3531:G:A	Affx-89025718	0.0051137	0.014851	NA	0.049954	0.82314	K21
MT:3531:G:A	Affx-89025718	0.0051137	0.0020517	0.0017654	0.24516	K44		MT:3531:G:A	Affx-89025718	0.0051137	0.0020453	0.0017649	0.24651	K44		MT:3531:G:A	Affx-89025718	0.0051137	0.089295	NA	1.4676	0.22573	K44
MT:3531:G:A	Affx-89025718	0.0051137	0.0011203	0.0021884	0.60868	K57		MT:3531:G:A	Affx-89025718	0.0051137	0.0011116	0.0021878	0.61139	K57		MT:3531:G:A	Affx-89025718	0.0051137	0.034765	NA	0.32405	0.56919	K57
MT:3594:C:T	Affx-89025741	0.0012967	-0.0023522	0.0098464	0.81119	20002_1065		MT:3594:C:T	Affx-89025741	0.0012967	-0.0022343	0.0098475	0.82051	20002_1065		MT:3594:C:T	Affx-89025741	0.0012967	-0.011045	NA	0.039626	0.84221	20002_1065
MT:3594:C:T	Affx-89025741	0.0012967	-0.006254	0.0062974	0.32066	20002_1465		MT:3594:C:T	Affx-89025741	0.0012967	-0.0061967	0.0062978	0.32514	20002_1465		MT:3594:C:T	Affx-89025741	0.0012967	-0.093046	NA	1.0091	0.31513	20002_1465
MT:3594:C:T	Affx-89025741	0.0012967	0.0030275	0.0073787	0.68158	20002_1473		MT:3594:C:T	Affx-89025741	0.0012967	0.003133	0.0073798	0.67117	20002_1473		MT:3594:C:T	Affx-89025741	0.0012967	0.034907	NA	0.22771	0.63323	20002_1473
MT:3594:C:T	Affx-89025741	0.0012967	0.0077418	0.0049165	0.11533	2443		MT:3594:C:T	Affx-89025741	0.0012967	0.0078363	0.0049179	0.11107	2443		MT:3594:C:T	Affx-89025741	0.0012967	0.16549	NA	2.7032	0.10015	2443
MT:3594:C:T	Affx-89025741	0.0012967	-0.05204	0.022575	0.021157	30650_irnt		MT:3594:C:T	Affx-89025741	0.0012967	-0.052101	0.022575	0.021006	30650_irnt		MT:3594:C:T	Affx-89025741	0.0012967	-0.052101	0.022575	NA	0.021006	30650_irnt
MT:3594:C:T	Affx-89025741	0.0012967	-0.026158	0.019116	0.17119	30700_irnt		MT:3594:C:T	Affx-89025741	0.0012967	-0.026329	0.019116	0.16842	30700_irnt		MT:3594:C:T	Affx-89025741	0.0012967	-0.026329	0.019116	NA	0.16842	30700_irnt
MT:3594:C:T	Affx-89025741	0.0012967	0.015106	0.024506	0.53763	30740_irnt		MT:3594:C:T	Affx-89025741	0.0012967	0.01527	0.024507	0.53323	30740_irnt		MT:3594:C:T	Affx-89025741	0.0012967	0.01527	0.024507	NA	0.53323	30740_irnt
MT:3594:C:T	Affx-89025741	0.0012967	-0.011075	0.022467	0.62205	30760_irnt		MT:3594:C:T	Affx-89025741	0.0012967	-0.011729	0.022476	0.60177	30760_irnt		MT:3594:C:T	Affx-89025741	0.0012967	-0.011729	0.022476	NA	0.60177	30760_irnt
MT:3594:C:T	Affx-89025741	0.0012967	-0.042095	0.02329	0.070694	30780_irnt		MT:3594:C:T	Affx-89025741	0.0012967	-0.042164	0.02329	0.070237	30780_irnt		MT:3594:C:T	Affx-89025741	0.0012967	-0.042164	0.02329	NA	0.070237	30780_irnt
MT:3594:C:T	Affx-89025741	0.0012967	0.0059385	0.022895	0.79534	30870_irnt		MT:3594:C:T	Affx-89025741	0.0012967	0.0067572	0.022907	0.76801	30870_irnt		MT:3594:C:T	Affx-89025741	0.0012967	0.0067572	0.022907	NA	0.76801	30870_irnt
MT:3594:C:T	Affx-89025741	0.0012967	0.012768	0.028764	0.65712	3148_irnt		MT:3594:C:T	Affx-89025741	0.0012967	0.012789	0.028766	0.6566	3148_irnt		MT:3594:C:T	Affx-89025741	0.0012967	0.012789	0.028766	NA	0.6566	3148_irnt
MT:3594:C:T	Affx-89025741	0.0012967	-0.027654	0.023331	0.23591	4079_irnt		MT:3594:C:T	Affx-89025741	0.0012967	-0.027545	0.023331	0.23776	4079_irnt		MT:3594:C:T	Affx-89025741	0.0012967	-0.027545	0.023331	NA	0.23776	4079_irnt
MT:3594:C:T	Affx-89025741	0.0012967	-0.016427	0.022092	0.45713	4080_irnt		MT:3594:C:T	Affx-89025741	0.0012967	-0.016164	0.022094	0.46441	4080_irnt		MT:3594:C:T	Affx-89025741	0.0012967	-0.016164	0.022094	NA	0.46441	4080_irnt
MT:3594:C:T	Affx-89025741	0.0012967	0.0040148	0.0048063	0.40354	C3_SKIN		MT:3594:C:T	Affx-89025741	0.0012967	0.0040018	0.0048063	0.40506	C3_SKIN		MT:3594:C:T	Affx-89025741	0.0012967	0.098392	NA	0.83352	0.36126	C3_SKIN
MT:3594:C:T	Affx-89025741	0.0012967	0.0016785	0.0052849	0.75079	I9_IHD		MT:3594:C:T	Affx-89025741	0.0012967	0.001756	0.0052858	0.73973	I9_IHD		MT:3594:C:T	Affx-89025741	0.0012967	0.044087	NA	0.18705	0.66538	I9_IHD
MT:3666:G:A	Affx-79381662	0.0025977	-0.002566	0.0069675	0.71266	20002_1065		MT:3666:G:A	Affx-79381662	0.0025977	-0.0024851	0.0069683	0.72137	20002_1065		MT:3666:G:A	Affx-79381662	0.0025977	-0.013664	NA	0.12316	0.72563	20002_1065
MT:3666:G:A	Affx-79381662	0.0025977	-0.0029067	0.0028227	0.30311	20002_1074		MT:3666:G:A	Affx-79381662	0.0025977	-0.0028771	0.002823	0.30814	20002_1074		MT:3666:G:A	Affx-79381662	0.0025977	-0.1072	NA	1.0513	0.3052	20002_1074
MT:3666:G:A	Affx-79381662	0.0025977	-0.0010267	0.0044562	0.81778	20002_1465		MT:3666:G:A	Affx-79381662	0.0025977	-0.00098727	0.0044564	0.82467	20002_1465		MT:3666:G:A	Affx-79381662	0.0025977	-0.013162	NA	0.045167	0.8317	20002_1465
MT:3666:G:A	Affx-79381662	0.0025977	-0.0020172	0.0052213	0.69924	20002_1473		MT:3666:G:A	Affx-79381662	0.0025977	-0.0019445	0.0052221	0.70962	20002_1473		MT:3666:G:A	Affx-79381662	0.0025977	-0.019433	NA	0.13748	0.7108	20002_1473
MT:3666:G:A	Affx-79381662	0.0025977	0.0048125	0.0034771	0.16634	2443		MT:3666:G:A	Affx-79381662	0.0025977	0.0048764	0.0034782	0.16091	2443		MT:3666:G:A	Affx-79381662	0.0025977	0.10472	NA	2.0436	0.15285	2443
MT:3666:G:A	Affx-79381662	0.0025977	-0.032409	0.015858	0.040988	30650_irnt		MT:3666:G:A	Affx-79381662	0.0025977	-0.032442	0.015858	0.040782	30650_irnt		MT:3666:G:A	Affx-79381662	0.0025977	-0.032442	0.015858	NA	0.040782	30650_irnt
MT:3666:G:A	Affx-79381662	0.0025977	-0.01378	0.013436	0.30508	30700_irnt		MT:3666:G:A	Affx-79381662	0.0025977	-0.01387	0.013437	0.30195	30700_irnt		MT:3666:G:A	Affx-79381662	0.0025977	-0.01387	0.013437	NA	0.30195	30700_irnt
MT:3666:G:A	Affx-79381662	0.0025977	0.022645	0.017277	0.18997	30740_irnt		MT:3666:G:A	Affx-79381662	0.0025977	0.022716	0.017278	0.18859	30740_irnt		MT:3666:G:A	Affx-79381662	0.0025977	0.022716	0.017278	NA	0.18859	30740_irnt
MT:3666:G:A	Affx-79381662	0.0025977	-0.013353	0.01582	0.39865	30760_irnt		MT:3666:G:A	Affx-79381662	0.0025977	-0.013575	0.015827	0.39105	30760_irnt		MT:3666:G:A	Affx-79381662	0.0025977	-0.013575	0.015827	NA	0.39105	30760_irnt
MT:3666:G:A	Affx-79381662	0.0025977	-0.015441	0.016333	0.34445	30780_irnt		MT:3666:G:A	Affx-79381662	0.0025977	-0.015471	0.016333	0.34352	30780_irnt		MT:3666:G:A	Affx-79381662	0.0025977	-0.015471	0.016333	NA	0.34352	30780_irnt
MT:3666:G:A	Affx-79381662	0.0025977	0.012332	0.016075	0.44299	30870_irnt		MT:3666:G:A	Affx-79381662	0.0025977	0.012751	0.016083	0.42787	30870_irnt		MT:3666:G:A	Affx-79381662	0.0025977	0.012751	0.016083	NA	0.42787	30870_irnt
MT:3666:G:A	Affx-79381662	0.0025977	0.036604	0.020667	0.076544	3148_irnt		MT:3666:G:A	Affx-79381662	0.0025977	0.036433	0.020668	0.07794	3148_irnt		MT:3666:G:A	Affx-79381662	0.0025977	0.036433	0.020668	NA	0.07794	3148_irnt
MT:3666:G:A	Affx-79381662	0.0025977	-0.0046565	0.004501	0.30088	3393		MT:3666:G:A	Affx-79381662	0.0025977	-0.0046712	0.004501	0.29936	3393		MT:3666:G:A	Affx-79381662	0.0025977	-0.10731	NA	1.0381	0.30827	3393
MT:3666:G:A	Affx-79381662	0.0025977	-0.0050214	0.016371	0.75905	4079_irnt		MT:3666:G:A	Affx-79381662	0.0025977	-0.0049648	0.016371	0.76169	4079_irnt		MT:3666:G:A	Affx-79381662	0.0025977	-0.0049648	0.016371	NA	0.76169	4079_irnt
MT:3666:G:A	Affx-79381662	0.0025977	0.013478	0.015502	0.38461	4080_irnt		MT:3666:G:A	Affx-79381662	0.0025977	0.013611	0.015503	0.37994	4080_irnt		MT:3666:G:A	Affx-79381662	0.0025977	0.013611	0.015503	NA	0.37994	4080_irnt
MT:3666:G:A	Affx-79381662	0.0025977	0.0027637	0.003401	0.41644	C3_SKIN		MT:3666:G:A	Affx-79381662	0.0025977	0.0027547	0.003401	0.41795	C3_SKIN		MT:3666:G:A	Affx-79381662	0.0025977	0.06782	NA	0.76807	0.38082	C3_SKIN
MT:3666:G:A	Affx-79381662	0.0025977	-0.0051143	0.0028996	0.077771	H26		MT:3666:G:A	Affx-79381662	0.0025977	-0.0051107	0.0028996	0.077979	H26		MT:3666:G:A	Affx-79381662	0.0025977	-0.19361	NA	3.3328	0.067912	H26
MT:3666:G:A	Affx-79381662	0.0025977	-8.2605e-05	0.0026812	0.97542	I9_CHD		MT:3666:G:A	Affx-79381662	0.0025977	-4.84e-05	0.0026815	0.9856	I9_CHD		MT:3666:G:A	Affx-79381662	0.0025977	0.0040933	NA	0.0016183	0.96791	I9_CHD
MT:3666:G:A	Affx-79381662	0.0025977	-0.00027507	0.0037397	0.94136	I9_IHD		MT:3666:G:A	Affx-79381662	0.0025977	-0.00022204	0.0037404	0.95266	I9_IHD		MT:3666:G:A	Affx-79381662	0.0025977	-0.0020882	NA	0.00081234	0.97726	I9_IHD
MT:3666:G:A	Affx-79381662	0.0025977	-0.003474	0.0028537	0.22346	K21		MT:3666:G:A	Affx-79381662	0.0025977	-0.0034594	0.0028537	0.22541	K21		MT:3666:G:A	Affx-79381662	0.0025977	-0.12247	NA	1.4184	0.23366	K21
MT:3666:G:A	Affx-79381662	0.0025977	-0.00088607	0.0024742	0.72025	K44		MT:3666:G:A	Affx-79381662	0.0025977	-0.00087456	0.0024742	0.72374	K44		MT:3666:G:A	Affx-79381662	0.0025977	-0.030809	NA	0.073391	0.78646	K44
MT:3666:G:A	Affx-79381662	0.0025977	0.003655	0.003067	0.23337	K57		MT:3666:G:A	Affx-79381662	0.0025977	0.0036734	0.0030671	0.23104	K57		MT:3666:G:A	Affx-79381662	0.0025977	0.10603	NA	1.5731	0.20976	K57
MT:3720:A:G	Affx-79381663	0.011915	0.0039217	0.0034628	0.25742	20002_1065		MT:3720:A:G	Affx-79381663	0.011915	0.0039183	0.0034631	0.25788	20002_1065		MT:3720:A:G	Affx-79381663	0.011915	0.021473	NA	1.2756	0.25872	20002_1065
MT:3720:A:G	Affx-79381663	0.011915	-0.00064869	0.0014028	0.64378	20002_1074		MT:3720:A:G	Affx-79381663	0.011915	-0.00065117	0.001403	0.64256	20002_1074		MT:3720:A:G	Affx-79381663	0.011915	-0.020379	NA	0.18288	0.66891	20002_1074
MT:3720:A:G	Affx-79381663	0.011915	0.00049414	0.0022147	0.82344	20002_1465		MT:3720:A:G	Affx-79381663	0.011915	0.00049318	0.0022148	0.82379	20002_1465		MT:3720:A:G	Affx-79381663	0.011915	0.0067841	NA	0.052523	0.81873	20002_1465
MT:3720:A:G	Affx-79381663	0.011915	0.00067913	0.0025949	0.79354	20002_1473		MT:3720:A:G	Affx-79381663	0.011915	0.00067736	0.0025953	0.7941	20002_1473		MT:3720:A:G	Affx-79381663	0.011915	0.0069346	NA	0.074293	0.78519	20002_1473
MT:3720:A:G	Affx-79381663	0.011915	0.00059276	0.0017285	0.73166	2443		MT:3720:A:G	Affx-79381663	0.011915	0.00058939	0.0017291	0.7332	2443		MT:3720:A:G	Affx-79381663	0.011915	0.014015	NA	0.1349	0.71341	2443
MT:3720:A:G	Affx-79381663	0.011915	0.0084216	0.0079207	0.28768	30650_irnt		MT:3720:A:G	Affx-79381663	0.011915	0.008421	0.0079207	0.28771	30650_irnt		MT:3720:A:G	Affx-79381663	0.011915	0.008421	0.0079207	NA	0.28771	30650_irnt
MT:3720:A:G	Affx-79381663	0.011915	-0.012835	0.0067064	0.055632	30700_irnt		MT:3720:A:G	Affx-79381663	0.011915	-0.012832	0.0067066	0.05571	30700_irnt		MT:3720:A:G	Affx-79381663	0.011915	-0.012832	0.0067066	NA	0.05571	30700_irnt
MT:3720:A:G	Affx-79381663	0.011915	0.010602	0.0086079	0.21807	30740_irnt		MT:3720:A:G	Affx-79381663	0.011915	0.010599	0.0086081	0.21824	30740_irnt		MT:3720:A:G	Affx-79381663	0.011915	0.010599	0.0086081	NA	0.21824	30740_irnt
MT:3720:A:G	Affx-79381663	0.011915	0.014039	0.0078794	0.074797	30760_irnt		MT:3720:A:G	Affx-79381663	0.011915	0.014051	0.0078829	0.074673	30760_irnt		MT:3720:A:G	Affx-79381663	0.011915	0.014051	0.0078829	NA	0.074673	30760_irnt
MT:3720:A:G	Affx-79381663	0.011915	-0.0057038	0.008152	0.48413	30780_irnt		MT:3720:A:G	Affx-79381663	0.011915	-0.0057006	0.008152	0.48437	30780_irnt		MT:3720:A:G	Affx-79381663	0.011915	-0.0057006	0.008152	NA	0.48437	30780_irnt
MT:3720:A:G	Affx-79381663	0.011915	-0.0065233	0.0080244	0.41626	30870_irnt		MT:3720:A:G	Affx-79381663	0.011915	-0.0065395	0.0080286	0.41534	30870_irnt		MT:3720:A:G	Affx-79381663	0.011915	-0.0065395	0.0080286	NA	0.41534	30870_irnt
MT:3720:A:G	Affx-79381663	0.011915	-0.011492	0.010498	0.27367	3148_irnt		MT:3720:A:G	Affx-79381663	0.011915	-0.011489	0.010499	0.2738	3148_irnt		MT:3720:A:G	Affx-79381663	0.011915	-0.011489	0.010499	NA	0.2738	3148_irnt
MT:3720:A:G	Affx-79381663	0.011915	-0.00068105	0.0022308	0.76014	3393		MT:3720:A:G	Affx-79381663	0.011915	-0.00068059	0.0022308	0.7603	3393		MT:3720:A:G	Affx-79381663	0.011915	-0.010909	NA	0.05135	0.82073	3393
MT:3720:A:G	Affx-79381663	0.011915	-0.0014754	0.0082204	0.85756	4079_irnt		MT:3720:A:G	Affx-79381663	0.011915	-0.0014722	0.0082205	0.85787	4079_irnt		MT:3720:A:G	Affx-79381663	0.011915	-0.0014722	0.0082205	NA	0.85787	4079_irnt
MT:3720:A:G	Affx-79381663	0.011915	-0.0030932	0.0077838	0.69108	4080_irnt		MT:3720:A:G	Affx-79381663	0.011915	-0.0030943	0.0077844	0.691	4080_irnt		MT:3720:A:G	Affx-79381663	0.011915	-0.0030943	0.0077844	NA	0.691	4080_irnt
MT:3720:A:G	Affx-79381663	0.011915	-7.528e-05	0.00169	0.96447	C3_SKIN		MT:3720:A:G	Affx-79381663	0.011915	-7.4983e-05	0.00169	0.96461	C3_SKIN		MT:3720:A:G	Affx-79381663	0.011915	-0.00064051	NA	0.00026973	0.9869	C3_SKIN
MT:3720:A:G	Affx-79381663	0.011915	-0.0010399	0.0014409	0.47046	H26		MT:3720:A:G	Affx-79381663	0.011915	-0.00104	0.0014409	0.47043	H26		MT:3720:A:G	Affx-79381663	0.011915	-0.031774	NA	0.46869	0.49359	H26
MT:3720:A:G	Affx-79381663	0.011915	-0.0013589	0.0010956	0.21486	I48		MT:3720:A:G	Affx-79381663	0.011915	-0.0013591	0.0010956	0.21479	I48		MT:3720:A:G	Affx-79381663	0.011915	-0.077193	NA	1.4793	0.22389	I48
MT:3720:A:G	Affx-79381663	0.011915	-0.0013083	0.0013324	0.32613	I9_CHD		MT:3720:A:G	Affx-79381663	0.011915	-0.0013091	0.0013325	0.32588	I9_CHD		MT:3720:A:G	Affx-79381663	0.011915	-0.049128	NA	0.92084	0.33725	I9_CHD
MT:3720:A:G	Affx-79381663	0.011915	-0.0023667	0.0018583	0.20281	I9_IHD		MT:3720:A:G	Affx-79381663	0.011915	-0.0023698	0.0018587	0.20232	I9_IHD		MT:3720:A:G	Affx-79381663	0.011915	-0.046574	NA	1.624	0.20254	I9_IHD
MT:3720:A:G	Affx-79381663	0.011915	0.00031788	0.0014181	0.82263	K21		MT:3720:A:G	Affx-79381663	0.011915	0.00031758	0.0014181	0.8228	K21		MT:3720:A:G	Affx-79381663	0.011915	0.012018	NA	0.067721	0.79468	K21
MT:3720:A:G	Affx-79381663	0.011915	0.002558	0.0012295	0.037475	K44		MT:3720:A:G	Affx-79381663	0.011915	0.0025578	0.0012295	0.037497	K44		MT:3720:A:G	Affx-79381663	0.011915	0.10129	NA	4.0983	0.042926	K44
MT:3720:A:G	Affx-79381663	0.011915	-0.0029495	0.0015241	0.052957	K57		MT:3720:A:G	Affx-79381663	0.011915	-0.0029499	0.0015241	0.052927	K57		MT:3720:A:G	Affx-79381663	0.011915	-0.087732	NA	3.7661	0.052303	K57
MT:3736:G:A	Affx-89025762	0.00078755	0.017741	0.012669	0.1614	20002_1065		MT:3736:G:A	Affx-89025762	0.00078755	0.018197	0.01267	0.15094	20002_1065		MT:3736:G:A	Affx-89025762	0.00078755	0.09726	NA	2.044	0.15281	20002_1065
MT:3736:G:A	Affx-89025762	0.00078755	0.0053915	0.0081025	0.50579	20002_1465		MT:3736:G:A	Affx-89025762	0.00078755	0.0056126	0.0081029	0.48852	20002_1465		MT:3736:G:A	Affx-89025762	0.00078755	0.078954	NA	0.57291	0.44911	20002_1465
MT:3736:G:A	Affx-89025762	0.00078755	0.0025962	0.0094937	0.78449	20002_1473		MT:3736:G:A	Affx-89025762	0.00078755	0.0030037	0.009495	0.75174	20002_1473		MT:3736:G:A	Affx-89025762	0.00078755	0.033761	NA	0.13512	0.71318	20002_1473
MT:3736:G:A	Affx-89025762	0.00078755	-0.0065142	0.029085	0.82278	30650_irnt		MT:3736:G:A	Affx-89025762	0.00078755	-0.0066875	0.029084	0.81814	30650_irnt		MT:3736:G:A	Affx-89025762	0.00078755	-0.0066875	0.029084	NA	0.81814	30650_irnt
MT:3736:G:A	Affx-89025762	0.00078755	-0.044509	0.024637	0.070828	30700_irnt		MT:3736:G:A	Affx-89025762	0.00078755	-0.04501	0.024637	0.067717	30700_irnt		MT:3736:G:A	Affx-89025762	0.00078755	-0.04501	0.024637	NA	0.067717	30700_irnt
MT:3736:G:A	Affx-89025762	0.00078755	0.047203	0.031828	0.13807	30740_irnt		MT:3736:G:A	Affx-89025762	0.00078755	0.047764	0.031829	0.13345	30740_irnt		MT:3736:G:A	Affx-89025762	0.00078755	0.047764	0.031829	NA	0.13345	30740_irnt
MT:3736:G:A	Affx-89025762	0.00078755	0.016711	0.029144	0.56638	30760_irnt		MT:3736:G:A	Affx-89025762	0.00078755	0.014485	0.029156	0.61932	30760_irnt		MT:3736:G:A	Affx-89025762	0.00078755	0.014485	0.029156	NA	0.61932	30760_irnt
MT:3736:G:A	Affx-89025762	0.00078755	-0.023408	0.030028	0.43567	30780_irnt		MT:3736:G:A	Affx-89025762	0.00078755	-0.023605	0.030028	0.43179	30780_irnt		MT:3736:G:A	Affx-89025762	0.00078755	-0.023605	0.030028	NA	0.43179	30780_irnt
MT:3736:G:A	Affx-89025762	0.00078755	0.034391	0.02953	0.24418	30870_irnt		MT:3736:G:A	Affx-89025762	0.00078755	0.036786	0.029545	0.2131	30870_irnt		MT:3736:G:A	Affx-89025762	0.00078755	0.036786	0.029545	NA	0.2131	30870_irnt
MT:3736:G:A	Affx-89025762	0.00078755	-0.037053	0.038913	0.34099	3148_irnt		MT:3736:G:A	Affx-89025762	0.00078755	-0.037711	0.038914	0.3325	3148_irnt		MT:3736:G:A	Affx-89025762	0.00078755	-0.037711	0.038914	NA	0.3325	3148_irnt
MT:3736:G:A	Affx-89025762	0.00078755	-0.01377	0.030321	0.64974	4079_irnt		MT:3736:G:A	Affx-89025762	0.00078755	-0.013383	0.030321	0.65896	4079_irnt		MT:3736:G:A	Affx-89025762	0.00078755	-0.013383	0.030321	NA	0.65896	4079_irnt
MT:3736:G:A	Affx-89025762	0.00078755	-0.0070376	0.028711	0.80636	4080_irnt		MT:3736:G:A	Affx-89025762	0.00078755	-0.0060899	0.028713	0.83203	4080_irnt		MT:3736:G:A	Affx-89025762	0.00078755	-0.0060899	0.028713	NA	0.83203	4080_irnt
MT:3796:A:G	Affx-89025739	0.015511	-0.0022172	0.0028705	0.43988	20002_1065		MT:3796:A:G	Affx-89025739	0.015511	-0.0021432	0.0028708	0.45532	20002_1065		MT:3796:A:G	Affx-89025739	0.015511	-0.011706	NA	0.54351	0.46098	20002_1065
MT:3796:A:G	Affx-89025739	0.015511	-0.00026031	0.0011629	0.82287	20002_1074		MT:3796:A:G	Affx-89025739	0.015511	-0.00023315	0.001163	0.84112	20002_1074		MT:3796:A:G	Affx-89025739	0.015511	-0.0064788	NA	0.027526	0.86823	20002_1074
MT:3796:A:G	Affx-89025739	0.015511	0.00080911	0.0018359	0.65941	20002_1465		MT:3796:A:G	Affx-89025739	0.015511	0.0008451	0.001836	0.6453	20002_1465		MT:3796:A:G	Affx-89025739	0.015511	0.01163	NA	0.22476	0.63543	20002_1465
MT:3796:A:G	Affx-89025739	0.015511	-0.00046754	0.0021511	0.82793	20002_1473		MT:3796:A:G	Affx-89025739	0.015511	-0.00040122	0.0021514	0.85206	20002_1473		MT:3796:A:G	Affx-89025739	0.015511	-0.0039512	NA	0.035403	0.85075	20002_1473
MT:3796:A:G	Affx-89025739	0.015511	-0.00061457	0.0014336	0.66814	2443		MT:3796:A:G	Affx-89025739	0.015511	-0.00055727	0.001434	0.69756	2443		MT:3796:A:G	Affx-89025739	0.015511	-0.011789	NA	0.13702	0.71126	2443
MT:3796:A:G	Affx-89025739	0.015511	-0.0052101	0.0065536	0.42661	30650_irnt		MT:3796:A:G	Affx-89025739	0.015511	-0.0052419	0.0065535	0.42379	30650_irnt		MT:3796:A:G	Affx-89025739	0.015511	-0.0052419	0.0065535	NA	0.42379	30650_irnt
MT:3796:A:G	Affx-89025739	0.015511	-2.6992e-05	0.0055546	0.99612	30700_irnt		MT:3796:A:G	Affx-89025739	0.015511	-0.0001187	0.0055547	0.98295	30700_irnt		MT:3796:A:G	Affx-89025739	0.015511	-0.0001187	0.0055547	NA	0.98295	30700_irnt
MT:3796:A:G	Affx-89025739	0.015511	-0.0024958	0.0071326	0.7264	30740_irnt		MT:3796:A:G	Affx-89025739	0.015511	-0.0024205	0.0071327	0.73434	30740_irnt		MT:3796:A:G	Affx-89025739	0.015511	-0.0024205	0.0071327	NA	0.73434	30740_irnt
MT:3796:A:G	Affx-89025739	0.015511	-0.0013055	0.0065302	0.84154	30760_irnt		MT:3796:A:G	Affx-89025739	0.015511	-0.0015959	0.006533	0.80702	30760_irnt		MT:3796:A:G	Affx-89025739	0.015511	-0.0015959	0.006533	NA	0.80702	30760_irnt
MT:3796:A:G	Affx-89025739	0.015511	0.005116	0.0067501	0.4485	30780_irnt		MT:3796:A:G	Affx-89025739	0.015511	0.0050822	0.0067501	0.4515	30780_irnt		MT:3796:A:G	Affx-89025739	0.015511	0.0050822	0.0067501	NA	0.4515	30780_irnt
MT:3796:A:G	Affx-89025739	0.015511	0.0028203	0.0066483	0.67141	30870_irnt		MT:3796:A:G	Affx-89025739	0.015511	0.0032547	0.0066518	0.62464	30870_irnt		MT:3796:A:G	Affx-89025739	0.015511	0.0032547	0.0066518	NA	0.62464	30870_irnt
MT:3796:A:G	Affx-89025739	0.015511	-0.0004741	0.0085474	0.95577	3148_irnt		MT:3796:A:G	Affx-89025739	0.015511	-0.00061755	0.0085476	0.9424	3148_irnt		MT:3796:A:G	Affx-89025739	0.015511	-0.00061755	0.0085476	NA	0.9424	3148_irnt
MT:3796:A:G	Affx-89025739	0.015511	-0.00048452	0.0018583	0.7943	3393		MT:3796:A:G	Affx-89025739	0.015511	-0.0004892	0.0018583	0.79236	3393		MT:3796:A:G	Affx-89025739	0.015511	-0.0091484	NA	0.053098	0.81776	3393
MT:3796:A:G	Affx-89025739	0.015511	0.0047181	0.0067408	0.48397	4079_irnt		MT:3796:A:G	Affx-89025739	0.015511	0.0047713	0.0067408	0.47906	4079_irnt		MT:3796:A:G	Affx-89025739	0.015511	0.0047713	0.0067408	NA	0.47906	4079_irnt
MT:3796:A:G	Affx-89025739	0.015511	0.0023134	0.0063828	0.71702	4080_irnt		MT:3796:A:G	Affx-89025739	0.015511	0.00244	0.0063832	0.70228	4080_irnt		MT:3796:A:G	Affx-89025739	0.015511	0.00244	0.0063832	NA	0.70228	4080_irnt
MT:3796:A:G	Affx-89025739	0.015511	0.00015021	0.001401	0.91462	C3_SKIN		MT:3796:A:G	Affx-89025739	0.015511	0.00014207	0.001401	0.91923	C3_SKIN		MT:3796:A:G	Affx-89025739	0.015511	0.0043044	NA	0.017652	0.8943	C3_SKIN
MT:3796:A:G	Affx-89025739	0.015511	0.0010476	0.0011945	0.38047	H26		MT:3796:A:G	Affx-89025739	0.015511	0.0010509	0.0011945	0.37898	H26		MT:3796:A:G	Affx-89025739	0.015511	0.035472	NA	0.90848	0.34052	H26
MT:3796:A:G	Affx-89025739	0.015511	-0.00013844	0.00090824	0.87885	I48		MT:3796:A:G	Affx-89025739	0.015511	-0.00013055	0.00090824	0.88571	I48		MT:3796:A:G	Affx-89025739	0.015511	-0.0045836	NA	0.0084604	0.92671	I48
MT:3796:A:G	Affx-89025739	0.015511	0.00062709	0.0011045	0.5702	I9_CHD		MT:3796:A:G	Affx-89025739	0.015511	0.00065822	0.0011046	0.55126	I9_CHD		MT:3796:A:G	Affx-89025739	0.015511	0.02527	NA	0.39016	0.53221	I9_CHD
MT:3796:A:G	Affx-89025739	0.015511	0.00038886	0.0015405	0.80072	I9_IHD		MT:3796:A:G	Affx-89025739	0.015511	0.00043721	0.0015408	0.7766	I9_IHD		MT:3796:A:G	Affx-89025739	0.015511	0.0087814	NA	0.090166	0.76397	I9_IHD
MT:3796:A:G	Affx-89025739	0.015511	-0.00066626	0.0011756	0.57087	K21		MT:3796:A:G	Affx-89025739	0.015511	-0.000653	0.0011756	0.57857	K21		MT:3796:A:G	Affx-89025739	0.015511	-0.020431	NA	0.27249	0.60167	K21
MT:3796:A:G	Affx-89025739	0.015511	-1.354e-05	0.0010192	0.9894	K44		MT:3796:A:G	Affx-89025739	0.015511	-3.0668e-06	0.0010193	0.9976	K44		MT:3796:A:G	Affx-89025739	0.015511	0.0021724	NA	0.002332	0.96148	K44
MT:3796:A:G	Affx-89025739	0.015511	-0.00015342	0.0012634	0.90335	K57		MT:3796:A:G	Affx-89025739	0.015511	-0.00013666	0.0012635	0.91387	K57		MT:3796:A:G	Affx-89025739	0.015511	-0.0025244	NA	0.0048434	0.94452	K57
MT:3834:G:A	Affx-92047845	0.00080418	0.0046637	0.013244	0.72474	20002_1065		MT:3834:G:A	Affx-92047845	0.00080418	0.0046503	0.013245	0.72552	20002_1065		MT:3834:G:A	Affx-92047845	0.00080418	0.027542	NA	0.14489	0.70347	20002_1065
MT:3834:G:A	Affx-92047845	0.00080418	0.032507	0.0084703	0.00012418	20002_1465		MT:3834:G:A	Affx-92047845	0.00080418	0.032501	0.0084708	0.00012463	20002_1465		MT:3834:G:A	Affx-92047845	0.00080418	0.34372	NA	12.732	0.0003595	20002_1465
MT:3834:G:A	Affx-92047845	0.00080418	-0.015635	0.0099248	0.11517	20002_1473		MT:3834:G:A	Affx-92047845	0.00080418	-0.015646	0.0099263	0.11498	20002_1473		MT:3834:G:A	Affx-92047845	0.00080418	-0.16303	NA	2.4121	0.1204	20002_1473
MT:3834:G:A	Affx-92047845	0.00080418	0.012504	0.030124	0.67807	30650_irnt		MT:3834:G:A	Affx-92047845	0.00080418	0.012507	0.030124	0.67801	30650_irnt		MT:3834:G:A	Affx-92047845	0.00080418	0.012507	0.030124	NA	0.67801	30650_irnt
MT:3834:G:A	Affx-92047845	0.00080418	-0.031479	0.025566	0.21821	30700_irnt		MT:3834:G:A	Affx-92047845	0.00080418	-0.031465	0.025566	0.21843	30700_irnt		MT:3834:G:A	Affx-92047845	0.00080418	-0.031465	0.025566	NA	0.21843	30700_irnt
MT:3834:G:A	Affx-92047845	0.00080418	-0.017099	0.033092	0.60535	30740_irnt		MT:3834:G:A	Affx-92047845	0.00080418	-0.017108	0.033092	0.60518	30740_irnt		MT:3834:G:A	Affx-92047845	0.00080418	-0.017108	0.033092	NA	0.60518	30740_irnt
MT:3834:G:A	Affx-92047845	0.00080418	0.034506	0.030232	0.25372	30760_irnt		MT:3834:G:A	Affx-92047845	0.00080418	0.034543	0.030245	0.25342	30760_irnt		MT:3834:G:A	Affx-92047845	0.00080418	0.034543	0.030245	NA	0.25342	30760_irnt
MT:3834:G:A	Affx-92047845	0.00080418	-0.026118	0.031042	0.40014	30780_irnt		MT:3834:G:A	Affx-92047845	0.00080418	-0.026111	0.031042	0.40028	30780_irnt		MT:3834:G:A	Affx-92047845	0.00080418	-0.026111	0.031042	NA	0.40028	30780_irnt
MT:3834:G:A	Affx-92047845	0.00080418	-0.011748	0.030586	0.70089	30870_irnt		MT:3834:G:A	Affx-92047845	0.00080418	-0.011812	0.030602	0.6995	30870_irnt		MT:3834:G:A	Affx-92047845	0.00080418	-0.011812	0.030602	NA	0.6995	30870_irnt
MT:3834:G:A	Affx-92047845	0.00080418	-0.061515	0.041253	0.13592	3148_irnt		MT:3834:G:A	Affx-92047845	0.00080418	-0.061502	0.041254	0.13601	3148_irnt		MT:3834:G:A	Affx-92047845	0.00080418	-0.061502	0.041254	NA	0.13601	3148_irnt
MT:3834:G:A	Affx-92047845	0.00080418	-0.035144	0.031422	0.26338	4079_irnt		MT:3834:G:A	Affx-92047845	0.00080418	-0.035145	0.031423	0.26338	4079_irnt		MT:3834:G:A	Affx-92047845	0.00080418	-0.035145	0.031423	NA	0.26338	4079_irnt
MT:3834:G:A	Affx-92047845	0.00080418	-0.030952	0.029753	0.29821	4080_irnt		MT:3834:G:A	Affx-92047845	0.00080418	-0.030966	0.029756	0.29803	4080_irnt		MT:3834:G:A	Affx-92047845	0.00080418	-0.030966	0.029756	NA	0.29803	4080_irnt
MT:3915:G:A	Affx-79381664	0.02679	6.6298e-05	0.0023255	0.97726	20002_1065		MT:3915:G:A	Affx-79381664	0.02679	6.7123e-05	0.0023258	0.97698	20002_1065		MT:3915:G:A	Affx-79381664	0.02679	0.00054277	NA	0.0017772	0.96637	20002_1065
MT:3915:G:A	Affx-79381664	0.02679	-0.00040022	0.00094211	0.67098	20002_1074		MT:3915:G:A	Affx-79381664	0.02679	-0.00040105	0.00094224	0.67037	20002_1074		MT:3915:G:A	Affx-79381664	0.02679	-0.012894	NA	0.15926	0.68984	20002_1074
MT:3915:G:A	Affx-79381664	0.02679	0.0011849	0.0014873	0.42563	20002_1465		MT:3915:G:A	Affx-79381664	0.02679	0.001186	0.0014874	0.42526	20002_1465		MT:3915:G:A	Affx-79381664	0.02679	0.016689	NA	0.69833	0.40335	20002_1465
MT:3915:G:A	Affx-79381664	0.02679	0.0016234	0.0017427	0.35156	20002_1473		MT:3915:G:A	Affx-79381664	0.02679	0.0016253	0.001743	0.35108	20002_1473		MT:3915:G:A	Affx-79381664	0.02679	0.016379	NA	0.91872	0.33781	20002_1473
MT:3915:G:A	Affx-79381664	0.02679	0.00028471	0.0011619	0.80644	2443		MT:3915:G:A	Affx-79381664	0.02679	0.00028466	0.0011623	0.80653	2443		MT:3915:G:A	Affx-79381664	0.02679	0.006816	NA	0.069798	0.79163	2443
MT:3915:G:A	Affx-79381664	0.02679	-0.0047833	0.0053135	0.36801	30650_irnt		MT:3915:G:A	Affx-79381664	0.02679	-0.0047854	0.0053135	0.3678	30650_irnt		MT:3915:G:A	Affx-79381664	0.02679	-0.0047854	0.0053135	NA	0.3678	30650_irnt
MT:3915:G:A	Affx-79381664	0.02679	0.0081756	0.0045012	0.069324	30700_irnt		MT:3915:G:A	Affx-79381664	0.02679	0.0081743	0.0045013	0.069377	30700_irnt		MT:3915:G:A	Affx-79381664	0.02679	0.0081743	0.0045013	NA	0.069377	30700_irnt
MT:3915:G:A	Affx-79381664	0.02679	-0.00088068	0.0057702	0.87869	30740_irnt		MT:3915:G:A	Affx-79381664	0.02679	-0.00087919	0.0057703	0.8789	30740_irnt		MT:3915:G:A	Affx-79381664	0.02679	-0.00087919	0.0057703	NA	0.8789	30740_irnt
MT:3915:G:A	Affx-79381664	0.02679	0.0038338	0.0052821	0.46795	30760_irnt		MT:3915:G:A	Affx-79381664	0.02679	0.0038268	0.0052844	0.46896	30760_irnt		MT:3915:G:A	Affx-79381664	0.02679	0.0038268	0.0052844	NA	0.46896	30760_irnt
MT:3915:G:A	Affx-79381664	0.02679	-0.0026536	0.0054688	0.62752	30780_irnt		MT:3915:G:A	Affx-79381664	0.02679	-0.0026524	0.0054688	0.62768	30780_irnt		MT:3915:G:A	Affx-79381664	0.02679	-0.0026524	0.0054688	NA	0.62768	30780_irnt
MT:3915:G:A	Affx-79381664	0.02679	-0.0042351	0.0053864	0.43171	30870_irnt		MT:3915:G:A	Affx-79381664	0.02679	-0.0042285	0.0053892	0.43268	30870_irnt		MT:3915:G:A	Affx-79381664	0.02679	-0.0042285	0.0053892	NA	0.43268	30870_irnt
MT:3915:G:A	Affx-79381664	0.02679	-0.0076469	0.0069906	0.27401	3148_irnt		MT:3915:G:A	Affx-79381664	0.02679	-0.0076472	0.0069909	0.27401	3148_irnt		MT:3915:G:A	Affx-79381664	0.02679	-0.0076472	0.0069909	NA	0.27401	3148_irnt
MT:3915:G:A	Affx-79381664	0.02679	-0.0018041	0.0015065	0.23111	3393		MT:3915:G:A	Affx-79381664	0.02679	-0.0018043	0.0015065	0.23107	3393		MT:3915:G:A	Affx-79381664	0.02679	-0.039221	NA	1.3749	0.24096	3393
MT:3915:G:A	Affx-79381664	0.02679	-0.0082799	0.005509	0.13285	4079_irnt		MT:3915:G:A	Affx-79381664	0.02679	-0.0082741	0.005509	0.13312	4079_irnt		MT:3915:G:A	Affx-79381664	0.02679	-0.0082741	0.005509	NA	0.13312	4079_irnt
MT:3915:G:A	Affx-79381664	0.02679	-0.014122	0.0052163	0.0067835	4080_irnt		MT:3915:G:A	Affx-79381664	0.02679	-0.014116	0.0052167	0.0068102	4080_irnt		MT:3915:G:A	Affx-79381664	0.02679	-0.014116	0.0052167	NA	0.0068102	4080_irnt
MT:3915:G:A	Affx-79381664	0.02679	0.001206	0.0011351	0.28801	C3_SKIN		MT:3915:G:A	Affx-79381664	0.02679	0.0012059	0.0011351	0.28807	C3_SKIN		MT:3915:G:A	Affx-79381664	0.02679	0.028404	NA	1.1892	0.27549	C3_SKIN
MT:3915:G:A	Affx-79381664	0.02679	-0.00084008	0.00096775	0.38536	H26		MT:3915:G:A	Affx-79381664	0.02679	-0.00083997	0.00096775	0.38542	H26		MT:3915:G:A	Affx-79381664	0.02679	-0.027878	NA	0.78402	0.37592	H26
MT:3915:G:A	Affx-79381664	0.02679	-0.00041824	0.00073583	0.56977	I48		MT:3915:G:A	Affx-79381664	0.02679	-0.00041801	0.00073584	0.56998	I48		MT:3915:G:A	Affx-79381664	0.02679	-0.022473	NA	0.29531	0.58684	I48
MT:3915:G:A	Affx-79381664	0.02679	-0.0015491	0.00089485	0.083434	I9_CHD		MT:3915:G:A	Affx-79381664	0.02679	-0.0015482	0.00089496	0.083642	I9_CHD		MT:3915:G:A	Affx-79381664	0.02679	-0.061127	NA	3.0596	0.080263	I9_CHD
MT:3915:G:A	Affx-79381664	0.02679	-6.2927e-05	0.0012481	0.95979	I9_IHD		MT:3915:G:A	Affx-79381664	0.02679	-6.3172e-05	0.0012483	0.95964	I9_IHD		MT:3915:G:A	Affx-79381664	0.02679	-0.00063804	NA	0.00069845	0.97892	I9_IHD
MT:3915:G:A	Affx-79381664	0.02679	0.0010606	0.0009524	0.26543	K21		MT:3915:G:A	Affx-79381664	0.02679	0.0010611	0.00095242	0.26525	K21		MT:3915:G:A	Affx-79381664	0.02679	0.035035	NA	1.2962	0.2549	K21
MT:3915:G:A	Affx-79381664	0.02679	-0.00088061	0.00082576	0.28623	K44		MT:3915:G:A	Affx-79381664	0.02679	-0.00088031	0.00082578	0.28641	K44		MT:3915:G:A	Affx-79381664	0.02679	-0.03831	NA	1.0672	0.30158	K44
MT:3915:G:A	Affx-79381664	0.02679	0.0013336	0.0010236	0.19263	K57		MT:3915:G:A	Affx-79381664	0.02679	0.0013341	0.0010236	0.19249	K57		MT:3915:G:A	Affx-79381664	0.02679	0.038212	NA	1.769	0.1835	K57
MT:3936:C:T	Affx-92047846	0.00020593	-0.081641	0.059634	0.17099	30650_irnt		MT:3936:C:T	Affx-92047846	0.00020593	-0.081642	0.059634	0.17099	30650_irnt		MT:3936:C:T	Affx-92047846	0.00020593	-0.081642	0.059634	NA	0.17099	30650_irnt
MT:3936:C:T	Affx-92047846	0.00020593	-0.048825	0.05061	0.33469	30700_irnt		MT:3936:C:T	Affx-92047846	0.00020593	-0.04882	0.050612	0.33475	30700_irnt		MT:3936:C:T	Affx-92047846	0.00020593	-0.04882	0.050612	NA	0.33475	30700_irnt
MT:3936:C:T	Affx-92047846	0.00020593	-0.057632	0.065873	0.38163	30740_irnt		MT:3936:C:T	Affx-92047846	0.00020593	-0.057642	0.065875	0.38156	30740_irnt		MT:3936:C:T	Affx-92047846	0.00020593	-0.057642	0.065875	NA	0.38156	30740_irnt
MT:3936:C:T	Affx-92047846	0.00020593	0.023876	0.060317	0.69223	30760_irnt		MT:3936:C:T	Affx-92047846	0.00020593	0.023885	0.060343	0.69224	30760_irnt		MT:3936:C:T	Affx-92047846	0.00020593	0.023885	0.060343	NA	0.69224	30760_irnt
MT:3936:C:T	Affx-92047846	0.00020593	-0.01797	0.061945	0.77174	30780_irnt		MT:3936:C:T	Affx-92047846	0.00020593	-0.017965	0.061945	0.77181	30780_irnt		MT:3936:C:T	Affx-92047846	0.00020593	-0.017965	0.061945	NA	0.77181	30780_irnt
MT:3936:C:T	Affx-92047846	0.00020593	-0.080595	0.060548	0.18316	30870_irnt		MT:3936:C:T	Affx-92047846	0.00020593	-0.080608	0.06058	0.18332	30870_irnt		MT:3936:C:T	Affx-92047846	0.00020593	-0.080608	0.06058	NA	0.18332	30870_irnt
MT:3936:C:T	Affx-92047846	0.00020593	-0.10008	0.077308	0.19548	3148_irnt		MT:3936:C:T	Affx-92047846	0.00020593	-0.10013	0.077311	0.19528	3148_irnt		MT:3936:C:T	Affx-92047846	0.00020593	-0.10013	0.077311	NA	0.19528	3148_irnt
MT:3936:C:T	Affx-92047846	0.00020593	0.081812	0.062196	0.18838	4079_irnt		MT:3936:C:T	Affx-92047846	0.00020593	0.081819	0.062197	0.18835	4079_irnt		MT:3936:C:T	Affx-92047846	0.00020593	0.081819	0.062197	NA	0.18835	4079_irnt
MT:3936:C:T	Affx-92047846	0.00020593	0.060824	0.058893	0.3017	4080_irnt		MT:3936:C:T	Affx-92047846	0.00020593	0.060828	0.058897	0.30171	4080_irnt		MT:3936:C:T	Affx-92047846	0.00020593	0.060828	0.058897	NA	0.30171	4080_irnt
MT:3990:C:T	Affx-92047847	0.0090804	0.0012793	0.0039705	0.74731	20002_1065		MT:3990:C:T	Affx-92047847	0.0090804	0.0012844	0.0039709	0.74636	20002_1065		MT:3990:C:T	Affx-92047847	0.0090804	0.007338	NA	0.11157	0.73836	20002_1065
MT:3990:C:T	Affx-92047847	0.0090804	-0.0014503	0.0016085	0.36726	20002_1074		MT:3990:C:T	Affx-92047847	0.0090804	-0.0014492	0.0016087	0.36766	20002_1074		MT:3990:C:T	Affx-92047847	0.0090804	-0.048167	NA	0.73259	0.39205	20002_1074
MT:3990:C:T	Affx-92047847	0.0090804	-0.0021741	0.0025394	0.39191	20002_1465		MT:3990:C:T	Affx-92047847	0.0090804	-0.0021712	0.0025395	0.39258	20002_1465		MT:3990:C:T	Affx-92047847	0.0090804	-0.030389	NA	0.74972	0.38657	20002_1465
MT:3990:C:T	Affx-92047847	0.0090804	0.0012483	0.0029754	0.67483	20002_1473		MT:3990:C:T	Affx-92047847	0.0090804	0.0012537	0.0029758	0.67354	20002_1473		MT:3990:C:T	Affx-92047847	0.0090804	0.012782	NA	0.19018	0.66277	20002_1473
MT:3990:C:T	Affx-92047847	0.0090804	0.0032504	0.0019841	0.10138	2443		MT:3990:C:T	Affx-92047847	0.0090804	0.0032537	0.0019847	0.10113	2443		MT:3990:C:T	Affx-92047847	0.0090804	0.070629	NA	2.7573	0.096813	2443
MT:3990:C:T	Affx-92047847	0.0090804	0.042651	0.0090703	2.5735e-06	30650_irnt		MT:3990:C:T	Affx-92047847	0.0090804	0.042648	0.0090703	2.5774e-06	30650_irnt		MT:3990:C:T	Affx-92047847	0.0090804	0.042648	0.0090703	NA	2.5774e-06	30650_irnt
MT:3990:C:T	Affx-92047847	0.0090804	-0.022272	0.0076881	0.0037691	30700_irnt		MT:3990:C:T	Affx-92047847	0.0090804	-0.022276	0.0076884	0.003763	30700_irnt		MT:3990:C:T	Affx-92047847	0.0090804	-0.022276	0.0076884	NA	0.003763	30700_irnt
MT:3990:C:T	Affx-92047847	0.0090804	-0.0078284	0.0098947	0.42884	30740_irnt		MT:3990:C:T	Affx-92047847	0.0090804	-0.0078244	0.0098949	0.42909	30740_irnt		MT:3990:C:T	Affx-92047847	0.0090804	-0.0078244	0.0098949	NA	0.42909	30740_irnt
MT:3990:C:T	Affx-92047847	0.0090804	-0.0010675	0.0090545	0.90615	30760_irnt		MT:3990:C:T	Affx-92047847	0.0090804	-0.001086	0.0090585	0.90457	30760_irnt		MT:3990:C:T	Affx-92047847	0.0090804	-0.001086	0.0090585	NA	0.90457	30760_irnt
MT:3990:C:T	Affx-92047847	0.0090804	-0.0071851	0.0093436	0.4419	30780_irnt		MT:3990:C:T	Affx-92047847	0.0090804	-0.0071856	0.0093436	0.44187	30780_irnt		MT:3990:C:T	Affx-92047847	0.0090804	-0.0071856	0.0093436	NA	0.44187	30780_irnt
MT:3990:C:T	Affx-92047847	0.0090804	0.0048766	0.0091994	0.59604	30870_irnt		MT:3990:C:T	Affx-92047847	0.0090804	0.0048995	0.0092043	0.59451	30870_irnt		MT:3990:C:T	Affx-92047847	0.0090804	0.0048995	0.0092043	NA	0.59451	30870_irnt
MT:3990:C:T	Affx-92047847	0.0090804	0.0019135	0.011726	0.87037	3148_irnt		MT:3990:C:T	Affx-92047847	0.0090804	0.0018988	0.011726	0.87136	3148_irnt		MT:3990:C:T	Affx-92047847	0.0090804	0.0018988	0.011726	NA	0.87136	3148_irnt
MT:3990:C:T	Affx-92047847	0.0090804	-0.0003271	0.0026064	0.90013	3393		MT:3990:C:T	Affx-92047847	0.0090804	-0.00032709	0.0026064	0.90013	3393		MT:3990:C:T	Affx-92047847	0.0090804	-0.0052047	NA	0.008383	0.92705	3393
MT:3990:C:T	Affx-92047847	0.0090804	-0.00092357	0.0094713	0.92232	4079_irnt		MT:3990:C:T	Affx-92047847	0.0090804	-0.00091594	0.0094714	0.92296	4079_irnt		MT:3990:C:T	Affx-92047847	0.0090804	-0.00091594	0.0094714	NA	0.92296	4079_irnt
MT:3990:C:T	Affx-92047847	0.0090804	-0.010276	0.0089682	0.25185	4080_irnt		MT:3990:C:T	Affx-92047847	0.0090804	-0.010264	0.0089689	0.25245	4080_irnt		MT:3990:C:T	Affx-92047847	0.0090804	-0.010264	0.0089689	NA	0.25245	4080_irnt
MT:3990:C:T	Affx-92047847	0.0090804	0.00061765	0.0019381	0.74996	C3_SKIN		MT:3990:C:T	Affx-92047847	0.0090804	0.00061703	0.0019381	0.7502	C3_SKIN		MT:3990:C:T	Affx-92047847	0.0090804	0.015581	NA	0.123	0.7258	C3_SKIN
MT:3990:C:T	Affx-92047847	0.0090804	0.00071706	0.0016524	0.66432	H26		MT:3990:C:T	Affx-92047847	0.0090804	0.00071733	0.0016524	0.6642	H26		MT:3990:C:T	Affx-92047847	0.0090804	0.02522	NA	0.24132	0.62326	H26
MT:3990:C:T	Affx-92047847	0.0090804	-0.0017264	0.0012564	0.1694	I48		MT:3990:C:T	Affx-92047847	0.0090804	-0.0017258	0.0012564	0.16957	I48		MT:3990:C:T	Affx-92047847	0.0090804	-0.098993	NA	1.8151	0.1779	I48
MT:3990:C:T	Affx-92047847	0.0090804	0.0028029	0.0015279	0.066585	I9_CHD		MT:3990:C:T	Affx-92047847	0.0090804	0.0028054	0.0015281	0.066372	I9_CHD		MT:3990:C:T	Affx-92047847	0.0090804	0.10062	NA	3.454	0.0631	I9_CHD
MT:3990:C:T	Affx-92047847	0.0090804	0.0012883	0.0021311	0.54549	I9_IHD		MT:3990:C:T	Affx-92047847	0.0090804	0.0012911	0.0021315	0.5447	I9_IHD		MT:3990:C:T	Affx-92047847	0.0090804	0.026758	NA	0.4352	0.50945	I9_IHD
MT:3990:C:T	Affx-92047847	0.0090804	0.0007991	0.0016262	0.62314	K21		MT:3990:C:T	Affx-92047847	0.0090804	0.00080021	0.0016262	0.62267	K21		MT:3990:C:T	Affx-92047847	0.0090804	0.028434	NA	0.28918	0.59075	K21
MT:3990:C:T	Affx-92047847	0.0090804	-0.00048468	0.0014099	0.73103	K44		MT:3990:C:T	Affx-92047847	0.0090804	-0.00048382	0.00141	0.73149	K44		MT:3990:C:T	Affx-92047847	0.0090804	-0.017786	NA	0.08168	0.77503	K44
MT:3990:C:T	Affx-92047847	0.0090804	-5.2802e-06	0.0017478	0.99759	K57		MT:3990:C:T	Affx-92047847	0.0090804	-3.9008e-06	0.0017478	0.99822	K57		MT:3990:C:T	Affx-92047847	0.0090804	0.0016065	NA	0.0010372	0.97431	K57
MT:3992:C:T	Affx-79381667	0.02305	0.0011981	0.0023617	0.61195	20002_1065		MT:3992:C:T	Affx-79381667	0.02305	0.0012321	0.0023619	0.60191	20002_1065		MT:3992:C:T	Affx-79381667	0.02305	0.0067621	NA	0.26885	0.60411	20002_1065
MT:3992:C:T	Affx-79381667	0.02305	-0.00031968	0.00095676	0.73828	20002_1074		MT:3992:C:T	Affx-79381667	0.02305	-0.00030753	0.00095689	0.74792	20002_1074		MT:3992:C:T	Affx-79381667	0.02305	-0.0096151	NA	0.087163	0.76782	20002_1074
MT:3992:C:T	Affx-79381667	0.02305	0.0022272	0.0015105	0.14034	20002_1465		MT:3992:C:T	Affx-79381667	0.02305	0.002244	0.0015105	0.1374	20002_1465		MT:3992:C:T	Affx-79381667	0.02305	0.02936	NA	2.1254	0.14487	20002_1465
MT:3992:C:T	Affx-79381667	0.02305	0.001182	0.0017698	0.50422	20002_1473		MT:3992:C:T	Affx-79381667	0.02305	0.0012129	0.0017701	0.4932	20002_1473		MT:3992:C:T	Affx-79381667	0.02305	0.011767	NA	0.45992	0.49766	20002_1473
MT:3992:C:T	Affx-79381667	0.02305	-7.6504e-05	0.0011796	0.94829	2443		MT:3992:C:T	Affx-79381667	0.02305	-4.9836e-05	0.0011799	0.96631	2443		MT:3992:C:T	Affx-79381667	0.02305	-0.00072945	NA	0.00077484	0.97779	2443
MT:3992:C:T	Affx-79381667	0.02305	0.0071325	0.0054023	0.18674	30650_irnt		MT:3992:C:T	Affx-79381667	0.02305	0.0071196	0.0054023	0.18754	30650_irnt		MT:3992:C:T	Affx-79381667	0.02305	0.0071196	0.0054023	NA	0.18754	30650_irnt
MT:3992:C:T	Affx-79381667	0.02305	-0.001306	0.0045769	0.77537	30700_irnt		MT:3992:C:T	Affx-79381667	0.02305	-0.001343	0.0045771	0.7692	30700_irnt		MT:3992:C:T	Affx-79381667	0.02305	-0.001343	0.0045771	NA	0.7692	30700_irnt
MT:3992:C:T	Affx-79381667	0.02305	0.0003565	0.0058867	0.95171	30740_irnt		MT:3992:C:T	Affx-79381667	0.02305	0.00040016	0.0058868	0.9458	30740_irnt		MT:3992:C:T	Affx-79381667	0.02305	0.00040016	0.0058868	NA	0.9458	30740_irnt
MT:3992:C:T	Affx-79381667	0.02305	0.011242	0.0053878	0.036929	30760_irnt		MT:3992:C:T	Affx-79381667	0.02305	0.011076	0.0053902	0.0399	30760_irnt		MT:3992:C:T	Affx-79381667	0.02305	0.011076	0.0053902	NA	0.0399	30760_irnt
MT:3992:C:T	Affx-79381667	0.02305	0.0027152	0.0055613	0.62538	30780_irnt		MT:3992:C:T	Affx-79381667	0.02305	0.0027023	0.0055613	0.62703	30780_irnt		MT:3992:C:T	Affx-79381667	0.02305	0.0027023	0.0055613	NA	0.62703	30780_irnt
MT:3992:C:T	Affx-79381667	0.02305	-0.0015188	0.0054764	0.78152	30870_irnt		MT:3992:C:T	Affx-79381667	0.02305	-0.0013448	0.0054792	0.80612	30870_irnt		MT:3992:C:T	Affx-79381667	0.02305	-0.0013448	0.0054792	NA	0.80612	30870_irnt
MT:3992:C:T	Affx-79381667	0.02305	0.005481	0.0070833	0.43906	3148_irnt		MT:3992:C:T	Affx-79381667	0.02305	0.0054466	0.0070836	0.44195	3148_irnt		MT:3992:C:T	Affx-79381667	0.02305	0.0054466	0.0070836	NA	0.44195	3148_irnt
MT:3992:C:T	Affx-79381667	0.02305	-0.0017267	0.0015357	0.26085	3393		MT:3992:C:T	Affx-79381667	0.02305	-0.0017271	0.0015357	0.26076	3393		MT:3992:C:T	Affx-79381667	0.02305	-0.037714	NA	1.233	0.26682	3393
MT:3992:C:T	Affx-79381667	0.02305	0.0086798	0.0055857	0.1202	4079_irnt		MT:3992:C:T	Affx-79381667	0.02305	0.0087085	0.0055858	0.11899	4079_irnt		MT:3992:C:T	Affx-79381667	0.02305	0.0087085	0.0055858	NA	0.11899	4079_irnt
MT:3992:C:T	Affx-79381667	0.02305	0.0062932	0.0052891	0.23411	4080_irnt		MT:3992:C:T	Affx-79381667	0.02305	0.0063591	0.0052895	0.22928	4080_irnt		MT:3992:C:T	Affx-79381667	0.02305	0.0063591	0.0052895	NA	0.22928	4080_irnt
MT:3992:C:T	Affx-79381667	0.02305	0.00020923	0.0011527	0.85596	C3_SKIN		MT:3992:C:T	Affx-79381667	0.02305	0.00020548	0.0011527	0.85851	C3_SKIN		MT:3992:C:T	Affx-79381667	0.02305	0.005696	NA	0.045449	0.83118	C3_SKIN
MT:3992:C:T	Affx-79381667	0.02305	-0.0006492	0.00098274	0.50887	H26		MT:3992:C:T	Affx-79381667	0.02305	-0.00064767	0.00098273	0.50986	H26		MT:3992:C:T	Affx-79381667	0.02305	-0.01955	NA	0.37692	0.53925	H26
MT:3992:C:T	Affx-79381667	0.02305	-6.6125e-05	0.00074723	0.92948	I48		MT:3992:C:T	Affx-79381667	0.02305	-6.2458e-05	0.00074723	0.93339	I48		MT:3992:C:T	Affx-79381667	0.02305	-0.0017785	NA	0.0018417	0.96577	I48
MT:3992:C:T	Affx-79381667	0.02305	-0.00023094	0.00090871	0.79939	I9_CHD		MT:3992:C:T	Affx-79381667	0.02305	-0.00021649	0.00090882	0.81172	I9_CHD		MT:3992:C:T	Affx-79381667	0.02305	-0.0070875	NA	0.042895	0.83592	I9_CHD
MT:3992:C:T	Affx-79381667	0.02305	0.00060546	0.0012674	0.63286	I9_IHD		MT:3992:C:T	Affx-79381667	0.02305	0.00062741	0.0012677	0.62065	I9_IHD		MT:3992:C:T	Affx-79381667	0.02305	0.012529	NA	0.26673	0.60553	I9_IHD
MT:3992:C:T	Affx-79381667	0.02305	-0.0021675	0.00096715	0.025018	K21		MT:3992:C:T	Affx-79381667	0.02305	-0.0021613	0.00096716	0.025437	K21		MT:3992:C:T	Affx-79381667	0.02305	-0.075058	NA	5.0773	0.024241	K21
MT:3992:C:T	Affx-79381667	0.02305	-0.0017294	0.00083855	0.039176	K44		MT:3992:C:T	Affx-79381667	0.02305	-0.0017245	0.00083856	0.039734	K44		MT:3992:C:T	Affx-79381667	0.02305	-0.078855	NA	4.2293	0.039732	K44
MT:3992:C:T	Affx-79381667	0.02305	-0.000857	0.0010395	0.40967	K57		MT:3992:C:T	Affx-79381667	0.02305	-0.00084922	0.0010395	0.41395	K57		MT:3992:C:T	Affx-79381667	0.02305	-0.023501	NA	0.60954	0.43496	K57
MT:4024:A:G	Affx-34462030	0.019437	0.0016526	0.0025675	0.51979	20002_1065		MT:4024:A:G	Affx-34462030	0.019437	0.0017028	0.0025677	0.50722	20002_1065		MT:4024:A:G	Affx-34462030	0.019437	0.0093503	NA	0.43487	0.50961	20002_1065
MT:4024:A:G	Affx-34462030	0.019437	-0.00031351	0.0010401	0.7631	20002_1074		MT:4024:A:G	Affx-34462030	0.019437	-0.00029519	0.0010403	0.77659	20002_1074		MT:4024:A:G	Affx-34462030	0.019437	-0.0092249	NA	0.068156	0.79404	20002_1074
MT:4024:A:G	Affx-34462030	0.019437	0.0015663	0.0016421	0.34015	20002_1465		MT:4024:A:G	Affx-34462030	0.019437	0.0015909	0.0016422	0.33266	20002_1465		MT:4024:A:G	Affx-34462030	0.019437	0.020831	NA	0.89834	0.34323	20002_1465
MT:4024:A:G	Affx-34462030	0.019437	0.001875	0.001924	0.32979	20002_1473		MT:4024:A:G	Affx-34462030	0.019437	0.0019203	0.0019243	0.31832	20002_1473		MT:4024:A:G	Affx-34462030	0.019437	0.018627	NA	0.98005	0.32219	20002_1473
MT:4024:A:G	Affx-34462030	0.019437	-0.00015274	0.0012823	0.90518	2443		MT:4024:A:G	Affx-34462030	0.019437	-0.0001137	0.0012826	0.92936	2443		MT:4024:A:G	Affx-34462030	0.019437	-0.0020956	NA	0.005392	0.94146	2443
MT:4024:A:G	Affx-34462030	0.019437	0.00752	0.0058821	0.20109	30650_irnt		MT:4024:A:G	Affx-34462030	0.019437	0.0075019	0.005882	0.20217	30650_irnt		MT:4024:A:G	Affx-34462030	0.019437	0.0075019	0.005882	NA	0.20217	30650_irnt
MT:4024:A:G	Affx-34462030	0.019437	0.00099362	0.0049818	0.84191	30700_irnt		MT:4024:A:G	Affx-34462030	0.019437	0.00094068	0.004982	0.85024	30700_irnt		MT:4024:A:G	Affx-34462030	0.019437	0.00094068	0.004982	NA	0.85024	30700_irnt
MT:4024:A:G	Affx-34462030	0.019437	0.0066575	0.0064042	0.29855	30740_irnt		MT:4024:A:G	Affx-34462030	0.019437	0.0067215	0.0064043	0.29394	30740_irnt		MT:4024:A:G	Affx-34462030	0.019437	0.0067215	0.0064043	NA	0.29394	30740_irnt
MT:4024:A:G	Affx-34462030	0.019437	0.01165	0.0058615	0.046865	30760_irnt		MT:4024:A:G	Affx-34462030	0.019437	0.011404	0.0058641	0.051805	30760_irnt		MT:4024:A:G	Affx-34462030	0.019437	0.011404	0.0058641	NA	0.051805	30760_irnt
MT:4024:A:G	Affx-34462030	0.019437	0.0012733	0.0060523	0.83337	30780_irnt		MT:4024:A:G	Affx-34462030	0.019437	0.0012531	0.0060522	0.83597	30780_irnt		MT:4024:A:G	Affx-34462030	0.019437	0.0012531	0.0060522	NA	0.83597	30780_irnt
MT:4024:A:G	Affx-34462030	0.019437	-0.002804	0.005961	0.63807	30870_irnt		MT:4024:A:G	Affx-34462030	0.019437	-0.0025551	0.0059641	0.66835	30870_irnt		MT:4024:A:G	Affx-34462030	0.019437	-0.0025551	0.0059641	NA	0.66835	30870_irnt
MT:4024:A:G	Affx-34462030	0.019437	0.0043887	0.0077238	0.5699	3148_irnt		MT:4024:A:G	Affx-34462030	0.019437	0.0043504	0.0077241	0.57328	3148_irnt		MT:4024:A:G	Affx-34462030	0.019437	0.0043504	0.0077241	NA	0.57328	3148_irnt
MT:4024:A:G	Affx-34462030	0.019437	-0.0015035	0.0016675	0.36723	3393		MT:4024:A:G	Affx-34462030	0.019437	-0.0015039	0.0016675	0.36709	3393		MT:4024:A:G	Affx-34462030	0.019437	-0.032292	NA	0.77126	0.37983	3393
MT:4024:A:G	Affx-34462030	0.019437	0.01163	0.0060754	0.05559	4079_irnt		MT:4024:A:G	Affx-34462030	0.019437	0.01167	0.0060755	0.054751	4079_irnt		MT:4024:A:G	Affx-34462030	0.019437	0.01167	0.0060755	NA	0.054751	4079_irnt
MT:4024:A:G	Affx-34462030	0.019437	0.004465	0.0057527	0.43766	4080_irnt		MT:4024:A:G	Affx-34462030	0.019437	0.00456	0.0057532	0.42801	4080_irnt		MT:4024:A:G	Affx-34462030	0.019437	0.00456	0.0057532	NA	0.42801	4080_irnt
MT:4024:A:G	Affx-34462030	0.019437	0.00072264	0.0012531	0.56414	C3_SKIN		MT:4024:A:G	Affx-34462030	0.019437	0.00071712	0.0012531	0.56712	C3_SKIN		MT:4024:A:G	Affx-34462030	0.019437	0.017354	NA	0.36179	0.54751	C3_SKIN
MT:4024:A:G	Affx-34462030	0.019437	-0.00086214	0.0010683	0.41967	H26		MT:4024:A:G	Affx-34462030	0.019437	-0.00085991	0.0010683	0.42087	H26		MT:4024:A:G	Affx-34462030	0.019437	-0.027067	NA	0.60639	0.43615	H26
MT:4024:A:G	Affx-34462030	0.019437	9.333e-05	0.00081232	0.90853	I48		MT:4024:A:G	Affx-34462030	0.019437	9.87e-05	0.00081232	0.90329	I48		MT:4024:A:G	Affx-34462030	0.019437	0.0072185	NA	0.025901	0.87214	I48
MT:4024:A:G	Affx-34462030	0.019437	-0.00012072	0.00098786	0.90274	I9_CHD		MT:4024:A:G	Affx-34462030	0.019437	-9.9537e-05	0.00098798	0.91975	I9_CHD		MT:4024:A:G	Affx-34462030	0.019437	-0.0026059	NA	0.0049387	0.94397	I9_CHD
MT:4024:A:G	Affx-34462030	0.019437	0.0011046	0.0013778	0.42275	I9_IHD		MT:4024:A:G	Affx-34462030	0.019437	0.0011372	0.0013781	0.40925	I9_IHD		MT:4024:A:G	Affx-34462030	0.019437	0.022087	NA	0.70892	0.3998	I9_IHD
MT:4024:A:G	Affx-34462030	0.019437	-0.0017722	0.0010514	0.091881	K21		MT:4024:A:G	Affx-34462030	0.019437	-0.0017632	0.0010514	0.093553	K21		MT:4024:A:G	Affx-34462030	0.019437	-0.060095	NA	2.8026	0.094109	K21
MT:4024:A:G	Affx-34462030	0.019437	-0.0018273	0.00091159	0.045021	K44		MT:4024:A:G	Affx-34462030	0.019437	-0.0018201	0.0009116	0.045867	K44		MT:4024:A:G	Affx-34462030	0.019437	-0.083495	NA	4.0077	0.045293	K44
MT:4024:A:G	Affx-34462030	0.019437	-5.1923e-05	0.00113	0.96335	K57		MT:4024:A:G	Affx-34462030	0.019437	-4.052e-05	0.00113	0.9714	K57		MT:4024:A:G	Affx-34462030	0.019437	2.7606e-05	NA	7.3151e-07	0.99932	K57
MT:4093:A:G	Affx-89025770	0.00097136	-0.006043	0.011374	0.59521	20002_1065		MT:4093:A:G	Affx-89025770	0.00097136	-0.0059679	0.011375	0.59984	20002_1065		MT:4093:A:G	Affx-89025770	0.00097136	-0.031594	NA	0.25012	0.61699	20002_1065
MT:4093:A:G	Affx-89025770	0.00097136	-0.011251	0.0072745	0.12195	20002_1465		MT:4093:A:G	Affx-89025770	0.00097136	-0.011214	0.0072749	0.1232	20002_1465		MT:4093:A:G	Affx-89025770	0.00097136	-0.16535	NA	2.3683	0.12382	20002_1465
MT:4093:A:G	Affx-89025770	0.00097136	-0.0094825	0.0085235	0.26592	20002_1473		MT:4093:A:G	Affx-89025770	0.00097136	-0.0094149	0.0085248	0.26941	20002_1473		MT:4093:A:G	Affx-89025770	0.00097136	-0.091868	NA	1.1283	0.28814	20002_1473
MT:4093:A:G	Affx-89025770	0.00097136	0.025874	0.025797	0.31588	30650_irnt		MT:4093:A:G	Affx-89025770	0.00097136	0.025862	0.025797	0.31611	30650_irnt		MT:4093:A:G	Affx-89025770	0.00097136	0.025862	0.025797	NA	0.31611	30650_irnt
MT:4093:A:G	Affx-89025770	0.00097136	-0.013833	0.021926	0.52813	30700_irnt		MT:4093:A:G	Affx-89025770	0.00097136	-0.013869	0.021927	0.52705	30700_irnt		MT:4093:A:G	Affx-89025770	0.00097136	-0.013869	0.021927	NA	0.52705	30700_irnt
MT:4093:A:G	Affx-89025770	0.00097136	-0.012396	0.028194	0.66019	30740_irnt		MT:4093:A:G	Affx-89025770	0.00097136	-0.012454	0.028195	0.65871	30740_irnt		MT:4093:A:G	Affx-89025770	0.00097136	-0.012454	0.028195	NA	0.65871	30740_irnt
MT:4093:A:G	Affx-89025770	0.00097136	0.010127	0.025774	0.69439	30760_irnt		MT:4093:A:G	Affx-89025770	0.00097136	0.010371	0.025785	0.68753	30760_irnt		MT:4093:A:G	Affx-89025770	0.00097136	0.010371	0.025785	NA	0.68753	30760_irnt
MT:4093:A:G	Affx-89025770	0.00097136	0.055564	0.026584	0.036602	30780_irnt		MT:4093:A:G	Affx-89025770	0.00097136	0.055553	0.026584	0.03664	30780_irnt		MT:4093:A:G	Affx-89025770	0.00097136	0.055553	0.026584	NA	0.03664	30780_irnt
MT:4093:A:G	Affx-89025770	0.00097136	0.011522	0.026232	0.66049	30870_irnt		MT:4093:A:G	Affx-89025770	0.00097136	0.011692	0.026245	0.65597	30870_irnt		MT:4093:A:G	Affx-89025770	0.00097136	0.011692	0.026245	NA	0.65597	30870_irnt
MT:4093:A:G	Affx-89025770	0.00097136	0.071847	0.033656	0.032782	3148_irnt		MT:4093:A:G	Affx-89025770	0.00097136	0.071832	0.033657	0.032826	3148_irnt		MT:4093:A:G	Affx-89025770	0.00097136	0.071832	0.033657	NA	0.032826	3148_irnt
MT:4093:A:G	Affx-89025770	0.00097136	0.010997	0.026851	0.68212	4079_irnt		MT:4093:A:G	Affx-89025770	0.00097136	0.011052	0.026851	0.68062	4079_irnt		MT:4093:A:G	Affx-89025770	0.00097136	0.011052	0.026851	NA	0.68062	4079_irnt
MT:4093:A:G	Affx-89025770	0.00097136	0.0089205	0.025425	0.72569	4080_irnt		MT:4093:A:G	Affx-89025770	0.00097136	0.0090516	0.025426	0.72185	4080_irnt		MT:4093:A:G	Affx-89025770	0.00097136	0.0090516	0.025426	NA	0.72185	4080_irnt
MT:4093:A:G	Affx-89025770	0.00097136	-0.0028548	0.0061048	0.64005	I9_IHD		MT:4093:A:G	Affx-89025770	0.00097136	-0.0028056	0.006106	0.64589	I9_IHD		MT:4093:A:G	Affx-89025770	0.00097136	-0.045333	NA	0.14867	0.69981	I9_IHD
MT:4171:C:A	Affx-89025668	0.00062173	0.0215	0.014213	0.13036	20002_1065		MT:4171:C:A	Affx-89025668	0.00062173	0.021377	0.014214	0.13261	20002_1065		MT:4171:C:A	Affx-89025668	0.00062173	0.11716	NA	2.3229	0.12748	20002_1065
MT:4171:C:A	Affx-89025668	0.00062173	3.1658e-05	0.010651	0.99763	20002_1473		MT:4171:C:A	Affx-89025668	0.00062173	-7.5782e-05	0.010652	0.99432	20002_1473		MT:4171:C:A	Affx-89025668	0.00062173	0.0055377	NA	0.0027032	0.95853	20002_1473
MT:4171:C:A	Affx-89025668	0.00062173	0.025173	0.032362	0.43665	30650_irnt		MT:4171:C:A	Affx-89025668	0.00062173	0.02523	0.032362	0.43561	30650_irnt		MT:4171:C:A	Affx-89025668	0.00062173	0.02523	0.032362	NA	0.43561	30650_irnt
MT:4171:C:A	Affx-89025668	0.00062173	-0.0045284	0.027401	0.86873	30700_irnt		MT:4171:C:A	Affx-89025668	0.00062173	-0.0043458	0.027402	0.87399	30700_irnt		MT:4171:C:A	Affx-89025668	0.00062173	-0.0043458	0.027402	NA	0.87399	30700_irnt
MT:4171:C:A	Affx-89025668	0.00062173	-0.03896	0.034776	0.26257	30740_irnt		MT:4171:C:A	Affx-89025668	0.00062173	-0.039133	0.034777	0.26047	30740_irnt		MT:4171:C:A	Affx-89025668	0.00062173	-0.039133	0.034777	NA	0.26047	30740_irnt
MT:4171:C:A	Affx-89025668	0.00062173	0.041078	0.031842	0.19703	30760_irnt		MT:4171:C:A	Affx-89025668	0.00062173	0.041751	0.031856	0.18999	30760_irnt		MT:4171:C:A	Affx-89025668	0.00062173	0.041751	0.031856	NA	0.18999	30760_irnt
MT:4171:C:A	Affx-89025668	0.00062173	0.040463	0.033348	0.22499	30780_irnt		MT:4171:C:A	Affx-89025668	0.00062173	0.040534	0.033348	0.22418	30780_irnt		MT:4171:C:A	Affx-89025668	0.00062173	0.040534	0.033348	NA	0.22418	30780_irnt
MT:4171:C:A	Affx-89025668	0.00062173	-0.026148	0.032781	0.42508	30870_irnt		MT:4171:C:A	Affx-89025668	0.00062173	-0.027004	0.032798	0.41031	30870_irnt		MT:4171:C:A	Affx-89025668	0.00062173	-0.027004	0.032798	NA	0.41031	30870_irnt
MT:4171:C:A	Affx-89025668	0.00062173	0.025858	0.041107	0.52932	3148_irnt		MT:4171:C:A	Affx-89025668	0.00062173	0.026101	0.041108	0.52547	3148_irnt		MT:4171:C:A	Affx-89025668	0.00062173	0.026101	0.041108	NA	0.52547	3148_irnt
MT:4171:C:A	Affx-89025668	0.00062173	0.031696	0.034548	0.3589	4079_irnt		MT:4171:C:A	Affx-89025668	0.00062173	0.031617	0.034548	0.3601	4079_irnt		MT:4171:C:A	Affx-89025668	0.00062173	0.031617	0.034548	NA	0.3601	4079_irnt
MT:4171:C:A	Affx-89025668	0.00062173	0.052573	0.032713	0.10803	4080_irnt		MT:4171:C:A	Affx-89025668	0.00062173	0.052365	0.032715	0.10946	4080_irnt		MT:4171:C:A	Affx-89025668	0.00062173	0.052365	0.032715	NA	0.10946	4080_irnt
MT:4216:T:C	Affx-89025684	0.212	0.0008473	0.0008674	0.32865	20002_1065		MT:4216:T:C	Affx-89025684	0.212	0.00085499	0.00086749	0.32433	20002_1065		MT:4216:T:C	Affx-89025684	0.212	0.0048117	NA	1.0072	0.31558	20002_1065
MT:4216:T:C	Affx-89025684	0.212	0.00071759	0.0003514	0.041141	20002_1074		MT:4216:T:C	Affx-89025684	0.212	0.00071945	0.00035144	0.040646	20002_1074		MT:4216:T:C	Affx-89025684	0.212	0.025014	NA	4.5301	0.033303	20002_1074
MT:4216:T:C	Affx-89025684	0.212	-0.00014498	0.00055476	0.79384	20002_1465		MT:4216:T:C	Affx-89025684	0.212	-0.0001403	0.00055479	0.80036	20002_1465		MT:4216:T:C	Affx-89025684	0.212	-0.0018614	NA	0.061513	0.80412	20002_1465
MT:4216:T:C	Affx-89025684	0.212	-0.0004924	0.00065001	0.44874	20002_1473		MT:4216:T:C	Affx-89025684	0.212	-0.00048389	0.00065011	0.45668	20002_1473		MT:4216:T:C	Affx-89025684	0.212	-0.0045534	NA	0.50388	0.4778	20002_1473
MT:4216:T:C	Affx-89025684	0.212	0.00055961	0.00043323	0.19646	2443		MT:4216:T:C	Affx-89025684	0.212	0.00056591	0.00043336	0.1916	2443		MT:4216:T:C	Affx-89025684	0.212	0.012838	NA	1.7904	0.18088	2443
MT:4216:T:C	Affx-89025684	0.212	0.0022423	0.0019804	0.25755	30650_irnt		MT:4216:T:C	Affx-89025684	0.212	0.002238	0.0019804	0.25845	30650_irnt		MT:4216:T:C	Affx-89025684	0.212	0.002238	0.0019804	NA	0.25845	30650_irnt
MT:4216:T:C	Affx-89025684	0.212	0.0012565	0.0016779	0.45396	30700_irnt		MT:4216:T:C	Affx-89025684	0.212	0.0012483	0.0016779	0.45691	30700_irnt		MT:4216:T:C	Affx-89025684	0.212	0.0012483	0.0016779	NA	0.45691	30700_irnt
MT:4216:T:C	Affx-89025684	0.212	-0.00010398	0.0021531	0.96148	30740_irnt		MT:4216:T:C	Affx-89025684	0.212	-9.7553e-05	0.0021532	0.96386	30740_irnt		MT:4216:T:C	Affx-89025684	0.212	-9.7553e-05	0.0021532	NA	0.96386	30740_irnt
MT:4216:T:C	Affx-89025684	0.212	-0.0019673	0.0019708	0.31815	30760_irnt		MT:4216:T:C	Affx-89025684	0.212	-0.002022	0.0019716	0.30509	30760_irnt		MT:4216:T:C	Affx-89025684	0.212	-0.002022	0.0019716	NA	0.30509	30760_irnt
MT:4216:T:C	Affx-89025684	0.212	-0.0038776	0.0020388	0.057185	30780_irnt		MT:4216:T:C	Affx-89025684	0.212	-0.0038817	0.0020388	0.056927	30780_irnt		MT:4216:T:C	Affx-89025684	0.212	-0.0038817	0.0020388	NA	0.056927	30780_irnt
MT:4216:T:C	Affx-89025684	0.212	0.0016618	0.0020077	0.40784	30870_irnt		MT:4216:T:C	Affx-89025684	0.212	0.0017186	0.0020088	0.39226	30870_irnt		MT:4216:T:C	Affx-89025684	0.212	0.0017186	0.0020088	NA	0.39226	30870_irnt
MT:4216:T:C	Affx-89025684	0.212	0.0027786	0.0026017	0.28552	3148_irnt		MT:4216:T:C	Affx-89025684	0.212	0.0027625	0.0026017	0.28833	3148_irnt		MT:4216:T:C	Affx-89025684	0.212	0.0027625	0.0026017	NA	0.28833	3148_irnt
MT:4216:T:C	Affx-89025684	0.212	0.00072444	0.00056448	0.19936	3393		MT:4216:T:C	Affx-89025684	0.212	0.00072234	0.00056447	0.20066	3393		MT:4216:T:C	Affx-89025684	0.212	0.016024	NA	1.7452	0.18648	3393
MT:4216:T:C	Affx-89025684	0.212	0.00011029	0.0020609	0.95732	4079_irnt		MT:4216:T:C	Affx-89025684	0.212	0.00012358	0.0020609	0.95218	4079_irnt		MT:4216:T:C	Affx-89025684	0.212	0.00012358	0.0020609	NA	0.95218	4079_irnt
MT:4216:T:C	Affx-89025684	0.212	0.001996	0.0019515	0.30639	4080_irnt		MT:4216:T:C	Affx-89025684	0.212	0.002024	0.0019516	0.2997	4080_irnt		MT:4216:T:C	Affx-89025684	0.212	0.002024	0.0019516	NA	0.2997	4080_irnt
MT:4216:T:C	Affx-89025684	0.212	-1.951e-05	0.00042337	0.96324	C3_SKIN		MT:4216:T:C	Affx-89025684	0.212	-2.0586e-05	0.00042337	0.96122	C3_SKIN		MT:4216:T:C	Affx-89025684	0.212	-0.0003667	NA	0.0013944	0.97021	C3_SKIN
MT:4216:T:C	Affx-89025684	0.212	0.00061852	0.00036096	0.086612	H26		MT:4216:T:C	Affx-89025684	0.212	0.00061889	0.00036095	0.086423	H26		MT:4216:T:C	Affx-89025684	0.212	0.020191	NA	3.1032	0.07814	H26
MT:4216:T:C	Affx-89025684	0.212	-5.1121e-05	0.00027446	0.85224	I48		MT:4216:T:C	Affx-89025684	0.212	-5.0089e-05	0.00027446	0.85519	I48		MT:4216:T:C	Affx-89025684	0.212	-0.0024487	NA	0.025975	0.87196	I48
MT:4216:T:C	Affx-89025684	0.212	0.00014781	0.00033377	0.65787	I9_CHD		MT:4216:T:C	Affx-89025684	0.212	0.0001519	0.00033381	0.64907	I9_CHD		MT:4216:T:C	Affx-89025684	0.212	0.006274	NA	0.25438	0.61401	I9_CHD
MT:4216:T:C	Affx-89025684	0.212	0.00049683	0.00046553	0.28587	I9_IHD		MT:4216:T:C	Affx-89025684	0.212	0.0005015	0.00046561	0.28144	I9_IHD		MT:4216:T:C	Affx-89025684	0.212	0.010148	NA	1.2957	0.255	I9_IHD
MT:4216:T:C	Affx-89025684	0.212	-0.00019851	0.00035524	0.57629	K21		MT:4216:T:C	Affx-89025684	0.212	-0.0001969	0.00035524	0.57939	K21		MT:4216:T:C	Affx-89025684	0.212	-0.0063445	NA	0.2919	0.58901	K21
MT:4216:T:C	Affx-89025684	0.212	0.00042979	0.000308	0.16289	K44		MT:4216:T:C	Affx-89025684	0.212	0.00043112	0.000308	0.1616	K44		MT:4216:T:C	Affx-89025684	0.212	0.019132	NA	2.0354	0.15368	K44
MT:4216:T:C	Affx-89025684	0.212	0.00013555	0.0003818	0.72256	K57		MT:4216:T:C	Affx-89025684	0.212	0.00013775	0.0003818	0.71826	K57		MT:4216:T:C	Affx-89025684	0.212	0.0043414	NA	0.15917	0.68992	K57
MT:4310:A:G	Affx-92047848	0.0003336	-0.0011219	0.02056	0.95648	20002_1065		MT:4310:A:G	Affx-92047848	0.0003336	-0.0011126	0.020562	0.95685	20002_1065		MT:4310:A:G	Affx-92047848	0.0003336	-0.00016664	NA	2.2117e-06	0.99881	20002_1065
MT:4310:A:G	Affx-92047848	0.0003336	0.081197	0.046412	0.08021	30650_irnt		MT:4310:A:G	Affx-92047848	0.0003336	0.081192	0.046412	0.080229	30650_irnt		MT:4310:A:G	Affx-92047848	0.0003336	0.081192	0.046412	NA	0.080229	30650_irnt
MT:4310:A:G	Affx-92047848	0.0003336	0.023682	0.039389	0.54769	30700_irnt		MT:4310:A:G	Affx-92047848	0.0003336	0.023671	0.03939	0.54789	30700_irnt		MT:4310:A:G	Affx-92047848	0.0003336	0.023671	0.03939	NA	0.54789	30700_irnt
MT:4310:A:G	Affx-92047848	0.0003336	0.0073702	0.050842	0.88474	30740_irnt		MT:4310:A:G	Affx-92047848	0.0003336	0.0073815	0.050843	0.88457	30740_irnt		MT:4310:A:G	Affx-92047848	0.0003336	0.0073815	0.050843	NA	0.88457	30740_irnt
MT:4310:A:G	Affx-92047848	0.0003336	0.04773	0.046553	0.30523	30760_irnt		MT:4310:A:G	Affx-92047848	0.0003336	0.047692	0.046573	0.30583	30760_irnt		MT:4310:A:G	Affx-92047848	0.0003336	0.047692	0.046573	NA	0.30583	30760_irnt
MT:4310:A:G	Affx-92047848	0.0003336	0.020599	0.047827	0.66668	30780_irnt		MT:4310:A:G	Affx-92047848	0.0003336	0.020597	0.047827	0.66672	30780_irnt		MT:4310:A:G	Affx-92047848	0.0003336	0.020597	0.047827	NA	0.66672	30780_irnt
MT:4310:A:G	Affx-92047848	0.0003336	0.00048304	0.047123	0.99182	30870_irnt		MT:4310:A:G	Affx-92047848	0.0003336	0.00053334	0.047148	0.99097	30870_irnt		MT:4310:A:G	Affx-92047848	0.0003336	0.00053334	0.047148	NA	0.99097	30870_irnt
MT:4310:A:G	Affx-92047848	0.0003336	-0.05834	0.064508	0.3658	3148_irnt		MT:4310:A:G	Affx-92047848	0.0003336	-0.058338	0.064511	0.36584	3148_irnt		MT:4310:A:G	Affx-92047848	0.0003336	-0.058338	0.064511	NA	0.36584	3148_irnt
MT:4310:A:G	Affx-92047848	0.0003336	0.030655	0.048728	0.52928	4079_irnt		MT:4310:A:G	Affx-92047848	0.0003336	0.030663	0.048728	0.52918	4079_irnt		MT:4310:A:G	Affx-92047848	0.0003336	0.030663	0.048728	NA	0.52918	4079_irnt
MT:4310:A:G	Affx-92047848	0.0003336	0.0096648	0.04614	0.83408	4080_irnt		MT:4310:A:G	Affx-92047848	0.0003336	0.0096751	0.046143	0.83392	4080_irnt		MT:4310:A:G	Affx-92047848	0.0003336	0.0096751	0.046143	NA	0.83392	4080_irnt
MT:4336:T:C	Affx-79381668	0.024037	0.0030329	0.0023143	0.19003	20002_1065		MT:4336:T:C	Affx-79381668	0.024037	0.0030103	0.0023146	0.19341	20002_1065		MT:4336:T:C	Affx-79381668	0.024037	0.016478	NA	1.6697	0.1963	20002_1065
MT:4336:T:C	Affx-79381668	0.024037	-2.169e-05	0.00093758	0.98154	20002_1074		MT:4336:T:C	Affx-79381668	0.024037	-3.1103e-05	0.0009377	0.97354	20002_1074		MT:4336:T:C	Affx-79381668	0.024037	0.00077338	NA	0.00058256	0.98074	20002_1074
MT:4336:T:C	Affx-79381668	0.024037	-0.00061182	0.0014802	0.67935	20002_1465		MT:4336:T:C	Affx-79381668	0.024037	-0.00062231	0.0014803	0.67419	20002_1465		MT:4336:T:C	Affx-79381668	0.024037	-0.0084426	NA	0.17593	0.67489	20002_1465
MT:4336:T:C	Affx-79381668	0.024037	0.0048788	0.0017343	0.0049065	20002_1473		MT:4336:T:C	Affx-79381668	0.024037	0.0048595	0.0017346	0.0050856	20002_1473		MT:4336:T:C	Affx-79381668	0.024037	0.046719	NA	7.7779	0.0052889	20002_1473
MT:4336:T:C	Affx-79381668	0.024037	0.00063577	0.0011563	0.58245	2443		MT:4336:T:C	Affx-79381668	0.024037	0.00061623	0.0011567	0.5942	2443		MT:4336:T:C	Affx-79381668	0.024037	0.014079	NA	0.30359	0.58164	2443
MT:4336:T:C	Affx-79381668	0.024037	0.003095	0.0052823	0.55793	30650_irnt		MT:4336:T:C	Affx-79381668	0.024037	0.0031009	0.0052823	0.55719	30650_irnt		MT:4336:T:C	Affx-79381668	0.024037	0.0031009	0.0052823	NA	0.55719	30650_irnt
MT:4336:T:C	Affx-79381668	0.024037	-0.0012752	0.0044764	0.77574	30700_irnt		MT:4336:T:C	Affx-79381668	0.024037	-0.00125	0.0044766	0.78006	30700_irnt		MT:4336:T:C	Affx-79381668	0.024037	-0.00125	0.0044766	NA	0.78006	30700_irnt
MT:4336:T:C	Affx-79381668	0.024037	-0.0026895	0.0057347	0.63908	30740_irnt		MT:4336:T:C	Affx-79381668	0.024037	-0.0027005	0.0057348	0.63771	30740_irnt		MT:4336:T:C	Affx-79381668	0.024037	-0.0027005	0.0057348	NA	0.63771	30740_irnt
MT:4336:T:C	Affx-79381668	0.024037	0.0011118	0.0052492	0.83225	30760_irnt		MT:4336:T:C	Affx-79381668	0.024037	0.0011598	0.0052515	0.82521	30760_irnt		MT:4336:T:C	Affx-79381668	0.024037	0.0011598	0.0052515	NA	0.82521	30760_irnt
MT:4336:T:C	Affx-79381668	0.024037	0.004487	0.0054374	0.40925	30780_irnt		MT:4336:T:C	Affx-79381668	0.024037	0.0044989	0.0054374	0.40802	30780_irnt		MT:4336:T:C	Affx-79381668	0.024037	0.0044989	0.0054374	NA	0.40802	30780_irnt
MT:4336:T:C	Affx-79381668	0.024037	0.006889	0.0053561	0.19837	30870_irnt		MT:4336:T:C	Affx-79381668	0.024037	0.006777	0.0053589	0.20601	30870_irnt		MT:4336:T:C	Affx-79381668	0.024037	0.006777	0.0053589	NA	0.20601	30870_irnt
MT:4336:T:C	Affx-79381668	0.024037	0.0055429	0.0069103	0.42248	3148_irnt		MT:4336:T:C	Affx-79381668	0.024037	0.0056289	0.0069105	0.41534	3148_irnt		MT:4336:T:C	Affx-79381668	0.024037	0.0056289	0.0069105	NA	0.41534	3148_irnt
MT:4336:T:C	Affx-79381668	0.024037	-0.001445	0.0015029	0.33632	3393		MT:4336:T:C	Affx-79381668	0.024037	-0.0014426	0.0015029	0.33709	3393		MT:4336:T:C	Affx-79381668	0.024037	-0.030602	NA	0.85516	0.3551	3393
MT:4336:T:C	Affx-79381668	0.024037	0.01042	0.0054558	0.056154	4079_irnt		MT:4336:T:C	Affx-79381668	0.024037	0.010408	0.0054558	0.056442	4079_irnt		MT:4336:T:C	Affx-79381668	0.024037	0.010408	0.0054558	NA	0.056442	4079_irnt
MT:4336:T:C	Affx-79381668	0.024037	0.015036	0.005166	0.0036088	4080_irnt		MT:4336:T:C	Affx-79381668	0.024037	0.014999	0.0051664	0.0036942	4080_irnt		MT:4336:T:C	Affx-79381668	0.024037	0.014999	0.0051664	NA	0.0036942	4080_irnt
MT:4336:T:C	Affx-79381668	0.024037	0.0003173	0.0011296	0.7788	C3_SKIN		MT:4336:T:C	Affx-79381668	0.024037	0.00031975	0.0011296	0.77713	C3_SKIN		MT:4336:T:C	Affx-79381668	0.024037	0.0085239	NA	0.105	0.74591	C3_SKIN
MT:4336:T:C	Affx-79381668	0.024037	5.3539e-06	0.00096309	0.99556	H26		MT:4336:T:C	Affx-79381668	0.024037	4.4262e-06	0.00096309	0.99633	H26		MT:4336:T:C	Affx-79381668	0.024037	0.000854	NA	0.00076116	0.97799	H26
MT:4336:T:C	Affx-79381668	0.024037	-5.2788e-05	0.00073229	0.94253	I48		MT:4336:T:C	Affx-79381668	0.024037	-5.5081e-05	0.0007323	0.94004	I48		MT:4336:T:C	Affx-79381668	0.024037	-0.0018784	NA	0.0021328	0.96316	I48
MT:4336:T:C	Affx-79381668	0.024037	-5.4688e-05	0.00089054	0.95103	I9_CHD		MT:4336:T:C	Affx-79381668	0.024037	-6.3796e-05	0.00089065	0.9429	I9_CHD		MT:4336:T:C	Affx-79381668	0.024037	-0.00043016	NA	0.00016315	0.98981	I9_CHD
MT:4336:T:C	Affx-79381668	0.024037	-0.0020884	0.0012421	0.092699	I9_IHD		MT:4336:T:C	Affx-79381668	0.024037	-0.002104	0.0012423	0.090346	I9_IHD		MT:4336:T:C	Affx-79381668	0.024037	-0.041512	NA	2.8446	0.091684	I9_IHD
MT:4336:T:C	Affx-79381668	0.024037	-0.00075261	0.00094782	0.42717	K21		MT:4336:T:C	Affx-79381668	0.024037	-0.00075641	0.00094784	0.42485	K21		MT:4336:T:C	Affx-79381668	0.024037	-0.024781	NA	0.60674	0.43602	K21
MT:4336:T:C	Affx-79381668	0.024037	0.00053896	0.00082179	0.51193	K44		MT:4336:T:C	Affx-79381668	0.024037	0.00053592	0.0008218	0.51432	K44		MT:4336:T:C	Affx-79381668	0.024037	0.024657	NA	0.47289	0.49166	K44
MT:4336:T:C	Affx-79381668	0.024037	-0.001299	0.0010187	0.20225	K57		MT:4336:T:C	Affx-79381668	0.024037	-0.0013039	0.0010187	0.20057	K57		MT:4336:T:C	Affx-79381668	0.024037	-0.038209	NA	1.6155	0.20373	K57
MT:4529:A:T	Affx-92047849	0.032159	0.0017738	0.0021285	0.40464	20002_1065		MT:4529:A:T	Affx-92047849	0.032159	0.0017707	0.0021287	0.40552	20002_1065		MT:4529:A:T	Affx-92047849	0.032159	0.0097731	NA	0.69506	0.40445	20002_1065
MT:4529:A:T	Affx-92047849	0.032159	-0.00037996	0.00086228	0.65947	20002_1074		MT:4529:A:T	Affx-92047849	0.032159	-0.00038225	0.0008624	0.65759	20002_1074		MT:4529:A:T	Affx-92047849	0.032159	-0.011519	NA	0.15589	0.69297	20002_1074
MT:4529:A:T	Affx-92047849	0.032159	-0.0015687	0.0013613	0.24918	20002_1465		MT:4529:A:T	Affx-92047849	0.032159	-0.0015696	0.0013614	0.24893	20002_1465		MT:4529:A:T	Affx-92047849	0.032159	-0.021308	NA	1.3188	0.25081	20002_1465
MT:4529:A:T	Affx-92047849	0.032159	-0.00071463	0.001595	0.65413	20002_1473		MT:4529:A:T	Affx-92047849	0.032159	-0.0007163	0.0015953	0.65342	20002_1473		MT:4529:A:T	Affx-92047849	0.032159	-0.0070415	NA	0.20048	0.65433	20002_1473
MT:4529:A:T	Affx-92047849	0.032159	0.00086502	0.001063	0.41578	2443		MT:4529:A:T	Affx-92047849	0.032159	0.00086191	0.0010633	0.4176	2443		MT:4529:A:T	Affx-92047849	0.032159	0.019261	NA	0.67976	0.40967	2443
MT:4529:A:T	Affx-92047849	0.032159	0.033892	0.0048548	2.9316e-12	30650_irnt		MT:4529:A:T	Affx-92047849	0.032159	0.033892	0.0048548	2.9346e-12	30650_irnt		MT:4529:A:T	Affx-92047849	0.032159	0.033892	0.0048548	NA	2.9346e-12	30650_irnt
MT:4529:A:T	Affx-92047849	0.032159	-0.011915	0.0041149	0.0037846	30700_irnt		MT:4529:A:T	Affx-92047849	0.032159	-0.011913	0.0041151	0.0037931	30700_irnt		MT:4529:A:T	Affx-92047849	0.032159	-0.011913	0.0041151	NA	0.0037931	30700_irnt
MT:4529:A:T	Affx-92047849	0.032159	-0.0020047	0.0052762	0.70398	30740_irnt		MT:4529:A:T	Affx-92047849	0.032159	-0.002007	0.0052764	0.70366	30740_irnt		MT:4529:A:T	Affx-92047849	0.032159	-0.002007	0.0052764	NA	0.70366	30740_irnt
MT:4529:A:T	Affx-92047849	0.032159	0.0067075	0.0048288	0.16481	30760_irnt		MT:4529:A:T	Affx-92047849	0.032159	0.0067162	0.0048309	0.16445	30760_irnt		MT:4529:A:T	Affx-92047849	0.032159	0.0067162	0.0048309	NA	0.16445	30760_irnt
MT:4529:A:T	Affx-92047849	0.032159	0.0045075	0.0049986	0.36718	30780_irnt		MT:4529:A:T	Affx-92047849	0.032159	0.0045102	0.0049986	0.3669	30780_irnt		MT:4529:A:T	Affx-92047849	0.032159	0.0045102	0.0049986	NA	0.3669	30780_irnt
MT:4529:A:T	Affx-92047849	0.032159	-0.0030666	0.0049232	0.53336	30870_irnt		MT:4529:A:T	Affx-92047849	0.032159	-0.0030781	0.0049258	0.53205	30870_irnt		MT:4529:A:T	Affx-92047849	0.032159	-0.0030781	0.0049258	NA	0.53205	30870_irnt
MT:4529:A:T	Affx-92047849	0.032159	0.0031817	0.006384	0.61821	3148_irnt		MT:4529:A:T	Affx-92047849	0.032159	0.0031819	0.0063843	0.61821	3148_irnt		MT:4529:A:T	Affx-92047849	0.032159	0.0031819	0.0063843	NA	0.61821	3148_irnt
MT:4529:A:T	Affx-92047849	0.032159	-0.003147	0.0013844	0.023016	3393		MT:4529:A:T	Affx-92047849	0.032159	-0.0031465	0.0013844	0.023038	3393		MT:4529:A:T	Affx-92047849	0.032159	-0.070918	NA	5.292	0.021423	3393
MT:4529:A:T	Affx-92047849	0.032159	-0.003978	0.0050629	0.43203	4079_irnt		MT:4529:A:T	Affx-92047849	0.032159	-0.0039753	0.005063	0.43235	4079_irnt		MT:4529:A:T	Affx-92047849	0.032159	-0.0039753	0.005063	NA	0.43235	4079_irnt
MT:4529:A:T	Affx-92047849	0.032159	-0.0079311	0.004794	0.098048	4080_irnt		MT:4529:A:T	Affx-92047849	0.032159	-0.007933	0.0047943	0.097994	4080_irnt		MT:4529:A:T	Affx-92047849	0.032159	-0.007933	0.0047943	NA	0.097994	4080_irnt
MT:4529:A:T	Affx-92047849	0.032159	-0.0002547	0.0010389	0.80633	C3_SKIN		MT:4529:A:T	Affx-92047849	0.032159	-0.00025442	0.0010389	0.80654	C3_SKIN		MT:4529:A:T	Affx-92047849	0.032159	-0.0054397	NA	0.051091	0.82118	C3_SKIN
MT:4529:A:T	Affx-92047849	0.032159	6.1529e-05	0.00088576	0.94462	H26		MT:4529:A:T	Affx-92047849	0.032159	6.1461e-05	0.00088575	0.94468	H26		MT:4529:A:T	Affx-92047849	0.032159	0.0023569	NA	0.0071134	0.93279	H26
MT:4529:A:T	Affx-92047849	0.032159	-0.00079388	0.00067349	0.23849	I48		MT:4529:A:T	Affx-92047849	0.032159	-0.00079408	0.00067349	0.23838	I48		MT:4529:A:T	Affx-92047849	0.032159	-0.044071	NA	1.3451	0.24614	I48
MT:4529:A:T	Affx-92047849	0.032159	0.00067864	0.00081903	0.40734	I9_CHD		MT:4529:A:T	Affx-92047849	0.032159	0.00067781	0.00081913	0.40797	I9_CHD		MT:4529:A:T	Affx-92047849	0.032159	0.025891	NA	0.74057	0.38948	I9_CHD
MT:4529:A:T	Affx-92047849	0.032159	0.0014236	0.0011424	0.21269	I9_IHD		MT:4529:A:T	Affx-92047849	0.032159	0.0014208	0.0011426	0.21369	I9_IHD		MT:4529:A:T	Affx-92047849	0.032159	0.027423	NA	1.6147	0.20383	I9_IHD
MT:4529:A:T	Affx-92047849	0.032159	-0.00049828	0.00087171	0.56759	K21		MT:4529:A:T	Affx-92047849	0.032159	-0.00049857	0.00087172	0.56737	K21		MT:4529:A:T	Affx-92047849	0.032159	-0.015846	NA	0.30019	0.58376	K21
MT:4529:A:T	Affx-92047849	0.032159	-0.00070521	0.0007558	0.35079	K44		MT:4529:A:T	Affx-92047849	0.032159	-0.00070547	0.00075581	0.35062	K44		MT:4529:A:T	Affx-92047849	0.032159	-0.030724	NA	0.84275	0.35861	K44
MT:4529:A:T	Affx-92047849	0.032159	0.00076176	0.00093688	0.41617	K57		MT:4529:A:T	Affx-92047849	0.032159	0.00076133	0.00093691	0.41645	K57		MT:4529:A:T	Affx-92047849	0.032159	0.021609	NA	0.67761	0.41041	K57
MT:4561:T:C	Affx-34462060	0.012326	0.00023969	0.0032116	0.94051	20002_1065		MT:4561:T:C	Affx-34462060	0.012326	0.00018526	0.003212	0.95401	20002_1065		MT:4561:T:C	Affx-34462060	0.012326	0.0011144	NA	0.0039227	0.95006	20002_1065
MT:4561:T:C	Affx-34462060	0.012326	-0.0025446	0.0013011	0.050496	20002_1074		MT:4561:T:C	Affx-34462060	0.012326	-0.0025659	0.0013013	0.048628	20002_1074		MT:4561:T:C	Affx-34462060	0.012326	-0.093758	NA	4.039	0.04446	20002_1074
MT:4561:T:C	Affx-34462060	0.012326	-0.0015099	0.0020541	0.4623	20002_1465		MT:4561:T:C	Affx-34462060	0.012326	-0.0015357	0.0020542	0.4547	20002_1465		MT:4561:T:C	Affx-34462060	0.012326	-0.020566	NA	0.53066	0.46633	20002_1465
MT:4561:T:C	Affx-34462060	0.012326	0.0040622	0.0024067	0.091439	20002_1473		MT:4561:T:C	Affx-34462060	0.012326	0.0040146	0.0024071	0.095354	20002_1473		MT:4561:T:C	Affx-34462060	0.012326	0.039033	NA	2.8079	0.093802	20002_1473
MT:4561:T:C	Affx-34462060	0.012326	-0.00097103	0.001603	0.54468	2443		MT:4561:T:C	Affx-34462060	0.012326	-0.0010138	0.0016035	0.52723	2443		MT:4561:T:C	Affx-34462060	0.012326	-0.022051	NA	0.37581	0.53985	2443
MT:4561:T:C	Affx-34462060	0.012326	0.009414	0.0073196	0.1984	30650_irnt		MT:4561:T:C	Affx-34462060	0.012326	0.009426	0.0073196	0.19783	30650_irnt		MT:4561:T:C	Affx-34462060	0.012326	0.009426	0.0073196	NA	0.19783	30650_irnt
MT:4561:T:C	Affx-34462060	0.012326	0.0028078	0.0062054	0.65092	30700_irnt		MT:4561:T:C	Affx-34462060	0.012326	0.0028451	0.0062056	0.64661	30700_irnt		MT:4561:T:C	Affx-34462060	0.012326	0.0028451	0.0062056	NA	0.64661	30700_irnt
MT:4561:T:C	Affx-34462060	0.012326	0.0056118	0.007968	0.48125	30740_irnt		MT:4561:T:C	Affx-34462060	0.012326	0.0055555	0.0079681	0.48567	30740_irnt		MT:4561:T:C	Affx-34462060	0.012326	0.0055555	0.0079681	NA	0.48567	30740_irnt
MT:4561:T:C	Affx-34462060	0.012326	0.0065655	0.0072921	0.36793	30760_irnt		MT:4561:T:C	Affx-34462060	0.012326	0.0067923	0.0072953	0.35183	30760_irnt		MT:4561:T:C	Affx-34462060	0.012326	0.0067923	0.0072953	NA	0.35183	30760_irnt
MT:4561:T:C	Affx-34462060	0.012326	0.0093817	0.0075365	0.21319	30780_irnt		MT:4561:T:C	Affx-34462060	0.012326	0.0093981	0.0075365	0.21239	30780_irnt		MT:4561:T:C	Affx-34462060	0.012326	0.0093981	0.0075365	NA	0.21239	30780_irnt
MT:4561:T:C	Affx-34462060	0.012326	0.0094337	0.0074247	0.20388	30870_irnt		MT:4561:T:C	Affx-34462060	0.012326	0.0092473	0.0074286	0.2132	30870_irnt		MT:4561:T:C	Affx-34462060	0.012326	0.0092473	0.0074286	NA	0.2132	30870_irnt
MT:4561:T:C	Affx-34462060	0.012326	0.010795	0.0097232	0.2669	3148_irnt		MT:4561:T:C	Affx-34462060	0.012326	0.010866	0.0097236	0.26377	3148_irnt		MT:4561:T:C	Affx-34462060	0.012326	0.010866	0.0097236	NA	0.26377	3148_irnt
MT:4561:T:C	Affx-34462060	0.012326	0.0022194	0.0020796	0.28587	3393		MT:4561:T:C	Affx-34462060	0.012326	0.0022291	0.0020796	0.28376	3393		MT:4561:T:C	Affx-34462060	0.012326	0.049803	NA	1.2774	0.25838	3393
MT:4561:T:C	Affx-34462060	0.012326	0.010355	0.0075857	0.17225	4079_irnt		MT:4561:T:C	Affx-34462060	0.012326	0.010319	0.0075858	0.17375	4079_irnt		MT:4561:T:C	Affx-34462060	0.012326	0.010319	0.0075858	NA	0.17375	4079_irnt
MT:4561:T:C	Affx-34462060	0.012326	0.014654	0.0071828	0.041337	4080_irnt		MT:4561:T:C	Affx-34462060	0.012326	0.014559	0.0071833	0.042692	4080_irnt		MT:4561:T:C	Affx-34462060	0.012326	0.014559	0.0071833	NA	0.042692	4080_irnt
MT:4561:T:C	Affx-34462060	0.012326	0.00032434	0.0015677	0.8361	C3_SKIN		MT:4561:T:C	Affx-34462060	0.012326	0.00033027	0.0015677	0.83314	C3_SKIN		MT:4561:T:C	Affx-34462060	0.012326	0.008342	NA	0.052797	0.81827	C3_SKIN
MT:4561:T:C	Affx-34462060	0.012326	0.00046966	0.0013366	0.72529	H26		MT:4561:T:C	Affx-34462060	0.012326	0.00046735	0.0013366	0.72659	H26		MT:4561:T:C	Affx-34462060	0.012326	0.016195	NA	0.14626	0.70213	H26
MT:4561:T:C	Affx-34462060	0.012326	-0.0017522	0.0010163	0.084675	I48		MT:4561:T:C	Affx-34462060	0.012326	-0.0017579	0.0010163	0.08368	I48		MT:4561:T:C	Affx-34462060	0.012326	-0.1031	NA	2.9956	0.083489	I48
MT:4561:T:C	Affx-34462060	0.012326	0.00031845	0.0012359	0.79667	I9_CHD		MT:4561:T:C	Affx-34462060	0.012326	0.00029608	0.001236	0.81069	I9_CHD		MT:4561:T:C	Affx-34462060	0.012326	0.013187	NA	0.081896	0.77474	I9_CHD
MT:4561:T:C	Affx-34462060	0.012326	-0.001952	0.0017238	0.25748	I9_IHD		MT:4561:T:C	Affx-34462060	0.012326	-0.0019884	0.0017241	0.24879	I9_IHD		MT:4561:T:C	Affx-34462060	0.012326	-0.038796	NA	1.3094	0.2525	I9_IHD
MT:4561:T:C	Affx-34462060	0.012326	-3.4054e-05	0.0013154	0.97935	K21		MT:4561:T:C	Affx-34462060	0.012326	-4.3476e-05	0.0013154	0.97363	K21		MT:4561:T:C	Affx-34462060	0.012326	0.00026399	NA	3.6875e-05	0.99515	K21
MT:4561:T:C	Affx-34462060	0.012326	-0.0006892	0.0011405	0.54564	K44		MT:4561:T:C	Affx-34462060	0.012326	-0.00069668	0.0011405	0.54129	K44		MT:4561:T:C	Affx-34462060	0.012326	-0.030195	NA	0.34844	0.555	K44
MT:4561:T:C	Affx-34462060	0.012326	0.0013061	0.0014137	0.35556	K57		MT:4561:T:C	Affx-34462060	0.012326	0.0012941	0.0014138	0.36001	K57		MT:4561:T:C	Affx-34462060	0.012326	0.03747	NA	0.88333	0.34729	K57
MT:4580:G:A	Affx-34462062	0.033808	0.0010289	0.001963	0.6002	20002_1065		MT:4580:G:A	Affx-34462062	0.033808	0.00098432	0.0019632	0.61611	20002_1065		MT:4580:G:A	Affx-34462062	0.033808	0.0053632	NA	0.24565	0.62016	20002_1065
MT:4580:G:A	Affx-34462062	0.033808	0.00084975	0.00079526	0.28529	20002_1074		MT:4580:G:A	Affx-34462062	0.033808	0.00083177	0.00079536	0.29567	20002_1074		MT:4580:G:A	Affx-34462062	0.033808	0.028478	NA	1.1776	0.27784	20002_1074
MT:4580:G:A	Affx-34462062	0.033808	-0.00062635	0.0012555	0.61786	20002_1465		MT:4580:G:A	Affx-34462062	0.033808	-0.00064717	0.0012556	0.60625	20002_1465		MT:4580:G:A	Affx-34462062	0.033808	-0.0090453	NA	0.28406	0.59405	20002_1465
MT:4580:G:A	Affx-34462062	0.033808	0.003857	0.001471	0.0087436	20002_1473		MT:4580:G:A	Affx-34462062	0.033808	0.0038186	0.0014713	0.0094468	20002_1473		MT:4580:G:A	Affx-34462062	0.033808	0.036355	NA	6.5284	0.010616	20002_1473
MT:4580:G:A	Affx-34462062	0.033808	0.0011839	0.00098065	0.22732	2443		MT:4580:G:A	Affx-34462062	0.033808	0.0011492	0.00098094	0.24139	2443		MT:4580:G:A	Affx-34462062	0.033808	0.025286	NA	1.389	0.23857	2443
MT:4580:G:A	Affx-34462062	0.033808	-8.2398e-05	0.0044791	0.98532	30650_irnt		MT:4580:G:A	Affx-34462062	0.033808	-6.8165e-05	0.0044791	0.98786	30650_irnt		MT:4580:G:A	Affx-34462062	0.033808	-6.8165e-05	0.0044791	NA	0.98786	30650_irnt
MT:4580:G:A	Affx-34462062	0.033808	-0.0022558	0.003796	0.55234	30700_irnt		MT:4580:G:A	Affx-34462062	0.033808	-0.0022071	0.0037961	0.56096	30700_irnt		MT:4580:G:A	Affx-34462062	0.033808	-0.0022071	0.0037961	NA	0.56096	30700_irnt
MT:4580:G:A	Affx-34462062	0.033808	0.0010078	0.0048665	0.83595	30740_irnt		MT:4580:G:A	Affx-34462062	0.033808	0.00095768	0.0048666	0.84399	30740_irnt		MT:4580:G:A	Affx-34462062	0.033808	0.00095768	0.0048666	NA	0.84399	30740_irnt
MT:4580:G:A	Affx-34462062	0.033808	0.0033615	0.0044543	0.45045	30760_irnt		MT:4580:G:A	Affx-34462062	0.033808	0.003559	0.0044562	0.42449	30760_irnt		MT:4580:G:A	Affx-34462062	0.033808	0.003559	0.0044562	NA	0.42449	30760_irnt
MT:4580:G:A	Affx-34462062	0.033808	-0.0061714	0.0046135	0.181	30780_irnt		MT:4580:G:A	Affx-34462062	0.033808	-0.0061509	0.0046135	0.18246	30780_irnt		MT:4580:G:A	Affx-34462062	0.033808	-0.0061509	0.0046135	NA	0.18246	30780_irnt
MT:4580:G:A	Affx-34462062	0.033808	-0.0069969	0.0045422	0.12346	30870_irnt		MT:4580:G:A	Affx-34462062	0.033808	-0.0072228	0.0045446	0.11199	30870_irnt		MT:4580:G:A	Affx-34462062	0.033808	-0.0072228	0.0045446	NA	0.11199	30870_irnt
MT:4580:G:A	Affx-34462062	0.033808	0.0019986	0.0059698	0.73778	3148_irnt		MT:4580:G:A	Affx-34462062	0.033808	0.0020395	0.00597	0.73264	3148_irnt		MT:4580:G:A	Affx-34462062	0.033808	0.0020395	0.00597	NA	0.73264	3148_irnt
MT:4580:G:A	Affx-34462062	0.033808	-0.00045519	0.0012683	0.71968	3393		MT:4580:G:A	Affx-34462062	0.033808	-0.00045046	0.0012683	0.72247	3393		MT:4580:G:A	Affx-34462062	0.033808	-0.0089899	NA	0.10741	0.74311	3393
MT:4580:G:A	Affx-34462062	0.033808	0.00047063	0.0046581	0.91952	4079_irnt		MT:4580:G:A	Affx-34462062	0.033808	0.00044059	0.0046581	0.92464	4079_irnt		MT:4580:G:A	Affx-34462062	0.033808	0.00044059	0.0046581	NA	0.92464	4079_irnt
MT:4580:G:A	Affx-34462062	0.033808	-0.0013862	0.0044111	0.75333	4080_irnt		MT:4580:G:A	Affx-34462062	0.033808	-0.0014691	0.0044114	0.73911	4080_irnt		MT:4580:G:A	Affx-34462062	0.033808	-0.0014691	0.0044114	NA	0.73911	4080_irnt
MT:4580:G:A	Affx-34462062	0.033808	-0.00055188	0.00095816	0.56463	C3_SKIN		MT:4580:G:A	Affx-34462062	0.033808	-0.00054706	0.00095816	0.56803	C3_SKIN		MT:4580:G:A	Affx-34462062	0.033808	-0.012179	NA	0.29772	0.58532	C3_SKIN
MT:4580:G:A	Affx-34462062	0.033808	0.00020228	0.00081691	0.80443	H26		MT:4580:G:A	Affx-34462062	0.033808	0.00020042	0.00081691	0.80619	H26		MT:4580:G:A	Affx-34462062	0.033808	0.0070114	NA	0.073281	0.78662	H26
MT:4580:G:A	Affx-34462062	0.033808	0.0010268	0.00062114	0.098325	I48		MT:4580:G:A	Affx-34462062	0.033808	0.0010222	0.00062115	0.099828	I48		MT:4580:G:A	Affx-34462062	0.033808	0.054818	NA	2.7313	0.098397	I48
MT:4580:G:A	Affx-34462062	0.033808	-0.00019599	0.00075538	0.79528	I9_CHD		MT:4580:G:A	Affx-34462062	0.033808	-0.00021402	0.00075547	0.77695	I9_CHD		MT:4580:G:A	Affx-34462062	0.033808	-0.0062014	NA	0.04831	0.82603	I9_CHD
MT:4580:G:A	Affx-34462062	0.033808	0.00045132	0.0010536	0.66838	I9_IHD		MT:4580:G:A	Affx-34462062	0.033808	0.00042113	0.0010538	0.68942	I9_IHD		MT:4580:G:A	Affx-34462062	0.033808	0.0089696	NA	0.19974	0.65493	I9_IHD
MT:4580:G:A	Affx-34462062	0.033808	-0.00078616	0.00080396	0.32815	K21		MT:4580:G:A	Affx-34462062	0.033808	-0.00079373	0.00080397	0.32351	K21		MT:4580:G:A	Affx-34462062	0.033808	-0.026144	NA	0.95006	0.3297	K21
MT:4580:G:A	Affx-34462062	0.033808	0.0001251	0.00069706	0.85758	K44		MT:4580:G:A	Affx-34462062	0.033808	0.00011906	0.00069707	0.86438	K44		MT:4580:G:A	Affx-34462062	0.033808	0.0049459	NA	0.026802	0.86996	K44
MT:4580:G:A	Affx-34462062	0.033808	-0.00035124	0.00086407	0.68437	K57		MT:4580:G:A	Affx-34462062	0.033808	-0.00036092	0.00086409	0.67617	K57		MT:4580:G:A	Affx-34462062	0.033808	-0.01017	NA	0.17055	0.67962	K57
MT:4639:T:C	Affx-89025699	0.0046896	0.0014616	0.005186	0.77808	20002_1065		MT:4639:T:C	Affx-89025699	0.0046896	0.0013693	0.0051866	0.79177	20002_1065		MT:4639:T:C	Affx-89025699	0.0046896	0.0079145	NA	0.076858	0.7816	20002_1065
MT:4639:T:C	Affx-89025699	0.0046896	-0.00044476	0.002101	0.83235	20002_1074		MT:4639:T:C	Affx-89025699	0.0046896	-0.0004808	0.0021012	0.81901	20002_1074		MT:4639:T:C	Affx-89025699	0.0046896	-0.014765	NA	0.043335	0.8351	20002_1074
MT:4639:T:C	Affx-89025699	0.0046896	-0.0064511	0.0033168	0.051781	20002_1465		MT:4639:T:C	Affx-89025699	0.0046896	-0.0064949	0.003317	0.050224	20002_1465		MT:4639:T:C	Affx-89025699	0.0046896	-0.090662	NA	3.7441	0.052994	20002_1465
MT:4639:T:C	Affx-89025699	0.0046896	-0.002417	0.0038863	0.53399	20002_1473		MT:4639:T:C	Affx-89025699	0.0046896	-0.0024977	0.0038869	0.52048	20002_1473		MT:4639:T:C	Affx-89025699	0.0046896	-0.023612	NA	0.37875	0.53827	20002_1473
MT:4639:T:C	Affx-89025699	0.0046896	0.0057591	0.0025944	0.02643	2443		MT:4639:T:C	Affx-89025699	0.0046896	0.005685	0.0025951	0.028478	2443		MT:4639:T:C	Affx-89025699	0.0046896	0.11411	NA	4.549	0.032937	2443
MT:4639:T:C	Affx-89025699	0.0046896	0.01366	0.011836	0.24848	30650_irnt		MT:4639:T:C	Affx-89025699	0.0046896	0.013696	0.011836	0.2472	30650_irnt		MT:4639:T:C	Affx-89025699	0.0046896	0.013696	0.011836	NA	0.2472	30650_irnt
MT:4639:T:C	Affx-89025699	0.0046896	0.0070573	0.010029	0.48164	30700_irnt		MT:4639:T:C	Affx-89025699	0.0046896	0.0071643	0.01003	0.47503	30700_irnt		MT:4639:T:C	Affx-89025699	0.0046896	0.0071643	0.01003	NA	0.47503	30700_irnt
MT:4639:T:C	Affx-89025699	0.0046896	-0.0038704	0.012789	0.76217	30740_irnt		MT:4639:T:C	Affx-89025699	0.0046896	-0.0039821	0.012789	0.75552	30740_irnt		MT:4639:T:C	Affx-89025699	0.0046896	-0.0039821	0.012789	NA	0.75552	30740_irnt
MT:4639:T:C	Affx-89025699	0.0046896	-0.0090185	0.011714	0.44136	30760_irnt		MT:4639:T:C	Affx-89025699	0.0046896	-0.0085815	0.011719	0.464	30760_irnt		MT:4639:T:C	Affx-89025699	0.0046896	-0.0085815	0.011719	NA	0.464	30760_irnt
MT:4639:T:C	Affx-89025699	0.0046896	0.0030401	0.012182	0.80293	30780_irnt		MT:4639:T:C	Affx-89025699	0.0046896	0.0030833	0.012182	0.80018	30780_irnt		MT:4639:T:C	Affx-89025699	0.0046896	0.0030833	0.012182	NA	0.80018	30780_irnt
MT:4639:T:C	Affx-89025699	0.0046896	0.0060613	0.011999	0.61345	30870_irnt		MT:4639:T:C	Affx-89025699	0.0046896	0.0055588	0.012005	0.64334	30870_irnt		MT:4639:T:C	Affx-89025699	0.0046896	0.0055588	0.012005	NA	0.64334	30870_irnt
MT:4639:T:C	Affx-89025699	0.0046896	-0.0058025	0.015345	0.70533	3148_irnt		MT:4639:T:C	Affx-89025699	0.0046896	-0.005653	0.015345	0.71259	3148_irnt		MT:4639:T:C	Affx-89025699	0.0046896	-0.005653	0.015345	NA	0.71259	3148_irnt
MT:4639:T:C	Affx-89025699	0.0046896	0.001188	0.0033611	0.72376	3393		MT:4639:T:C	Affx-89025699	0.0046896	0.0011993	0.0033611	0.72122	3393		MT:4639:T:C	Affx-89025699	0.0046896	0.029391	NA	0.16738	0.68245	3393
MT:4639:T:C	Affx-89025699	0.0046896	-0.012729	0.012167	0.29545	4079_irnt		MT:4639:T:C	Affx-89025699	0.0046896	-0.012791	0.012167	0.29311	4079_irnt		MT:4639:T:C	Affx-89025699	0.0046896	-0.012791	0.012167	NA	0.29311	4079_irnt
MT:4639:T:C	Affx-89025699	0.0046896	-0.0071089	0.011521	0.5372	4080_irnt		MT:4639:T:C	Affx-89025699	0.0046896	-0.0072725	0.011521	0.5279	4080_irnt		MT:4639:T:C	Affx-89025699	0.0046896	-0.0072725	0.011521	NA	0.5279	4080_irnt
MT:4639:T:C	Affx-89025699	0.0046896	0.00050656	0.0025314	0.8414	C3_SKIN		MT:4639:T:C	Affx-89025699	0.0046896	0.00051662	0.0025314	0.83829	C3_SKIN		MT:4639:T:C	Affx-89025699	0.0046896	0.014718	NA	0.063088	0.80168	C3_SKIN
MT:4639:T:C	Affx-89025699	0.0046896	-0.0015123	0.0021582	0.48348	H26		MT:4639:T:C	Affx-89025699	0.0046896	-0.0015163	0.0021582	0.48234	H26		MT:4639:T:C	Affx-89025699	0.0046896	-0.049282	NA	0.47693	0.48982	H26
MT:4639:T:C	Affx-89025699	0.0046896	0.002176	0.001641	0.18485	I48		MT:4639:T:C	Affx-89025699	0.0046896	0.0021664	0.001641	0.18679	I48		MT:4639:T:C	Affx-89025699	0.0046896	0.11188	NA	1.7686	0.18355	I48
MT:4639:T:C	Affx-89025699	0.0046896	0.0043264	0.0019957	0.030166	I9_CHD		MT:4639:T:C	Affx-89025699	0.0046896	0.0042885	0.0019959	0.031664	I9_CHD		MT:4639:T:C	Affx-89025699	0.0046896	0.14312	NA	4.3963	0.036017	I9_CHD
MT:4639:T:C	Affx-89025699	0.0046896	0.002679	0.0027835	0.33581	I9_IHD		MT:4639:T:C	Affx-89025699	0.0046896	0.0026172	0.002784	0.34717	I9_IHD		MT:4639:T:C	Affx-89025699	0.0046896	0.048811	NA	0.88767	0.34611	I9_IHD
MT:4639:T:C	Affx-89025699	0.0046896	-0.00010548	0.002124	0.96039	K21		MT:4639:T:C	Affx-89025699	0.0046896	-0.00012147	0.0021241	0.95439	K21		MT:4639:T:C	Affx-89025699	0.0046896	0.00039089	NA	3.1407e-05	0.99553	K21
MT:4639:T:C	Affx-89025699	0.0046896	0.00077866	0.0018416	0.67243	K44		MT:4639:T:C	Affx-89025699	0.0046896	0.00076595	0.0018416	0.67748	K44		MT:4639:T:C	Affx-89025699	0.0046896	0.038903	NA	0.24224	0.62259	K44
MT:4639:T:C	Affx-89025699	0.0046896	0.0020186	0.0022828	0.37657	K57		MT:4639:T:C	Affx-89025699	0.0046896	0.0019982	0.0022829	0.38142	K57		MT:4639:T:C	Affx-89025699	0.0046896	0.058136	NA	0.84298	0.35855	K57
MT:4646:T:C	Affx-79443430	0.02318	0.0041167	0.0071203	0.56315	20002_1065		MT:4646:T:C	Affx-79443430	0.02318	0.0041228	0.007121	0.56262	20002_1065		MT:4646:T:C	Affx-79443430	0.02318	0.023259	NA	0.35189	0.55304	20002_1065
MT:4646:T:C	Affx-79443430	0.02318	0.00063006	0.0028846	0.8271	20002_1074		MT:4646:T:C	Affx-79443430	0.02318	0.0006325	0.0028849	0.82646	20002_1074		MT:4646:T:C	Affx-79443430	0.02318	0.03043	NA	0.10113	0.75048	20002_1074
MT:4646:T:C	Affx-79443430	0.02318	0.0055006	0.0045539	0.22709	20002_1465		MT:4646:T:C	Affx-79443430	0.02318	0.0055035	0.0045542	0.22687	20002_1465		MT:4646:T:C	Affx-79443430	0.02318	0.075957	NA	1.5782	0.20902	20002_1465
MT:4646:T:C	Affx-79443430	0.02318	-0.0036379	0.0053358	0.49538	20002_1473		MT:4646:T:C	Affx-79443430	0.02318	-0.0036326	0.0053366	0.49607	20002_1473		MT:4646:T:C	Affx-79443430	0.02318	-0.035186	NA	0.43194	0.51104	20002_1473
MT:4646:T:C	Affx-79443430	0.02318	0.0044488	0.0035535	0.21059	2443		MT:4646:T:C	Affx-79443430	0.02318	0.0044538	0.0035545	0.21021	2443		MT:4646:T:C	Affx-79443430	0.02318	0.095203	NA	1.6323	0.20139	2443
MT:4646:T:C	Affx-79443430	0.02318	0.00015052	0.016307	0.99264	30650_irnt		MT:4646:T:C	Affx-79443430	0.02318	0.00014848	0.016307	0.99274	30650_irnt		MT:4646:T:C	Affx-79443430	0.02318	0.00014848	0.016307	NA	0.99274	30650_irnt
MT:4646:T:C	Affx-79443430	0.02318	-0.017532	0.013815	0.20442	30700_irnt		MT:4646:T:C	Affx-79443430	0.02318	-0.017539	0.013816	0.20427	30700_irnt		MT:4646:T:C	Affx-79443430	0.02318	-0.017539	0.013816	NA	0.20427	30700_irnt
MT:4646:T:C	Affx-79443430	0.02318	0.02074	0.017761	0.24292	30740_irnt		MT:4646:T:C	Affx-79443430	0.02318	0.020747	0.017762	0.24276	30740_irnt		MT:4646:T:C	Affx-79443430	0.02318	0.020747	0.017762	NA	0.24276	30740_irnt
MT:4646:T:C	Affx-79443430	0.02318	0.0099567	0.016263	0.54038	30760_irnt		MT:4646:T:C	Affx-79443430	0.02318	0.0099273	0.01627	0.54175	30760_irnt		MT:4646:T:C	Affx-79443430	0.02318	0.0099273	0.01627	NA	0.54175	30760_irnt
MT:4646:T:C	Affx-79443430	0.02318	0.043612	0.016813	0.0094892	30780_irnt		MT:4646:T:C	Affx-79443430	0.02318	0.043609	0.016813	0.0094934	30780_irnt		MT:4646:T:C	Affx-79443430	0.02318	0.043609	0.016813	NA	0.0094934	30780_irnt
MT:4646:T:C	Affx-79443430	0.02318	-0.0058226	0.016528	0.72462	30870_irnt		MT:4646:T:C	Affx-79443430	0.02318	-0.005792	0.016537	0.72615	30870_irnt		MT:4646:T:C	Affx-79443430	0.02318	-0.005792	0.016537	NA	0.72615	30870_irnt
MT:4646:T:C	Affx-79443430	0.02318	0.0093608	0.021177	0.65847	3148_irnt		MT:4646:T:C	Affx-79443430	0.02318	0.0093668	0.021178	0.65827	3148_irnt		MT:4646:T:C	Affx-79443430	0.02318	0.0093668	0.021178	NA	0.65827	3148_irnt
MT:4646:T:C	Affx-79443430	0.02318	-0.0044466	0.0046576	0.33974	3393		MT:4646:T:C	Affx-79443430	0.02318	-0.0044474	0.0046576	0.33964	3393		MT:4646:T:C	Affx-79443430	0.02318	-0.096077	NA	0.81142	0.3677	3393
MT:4646:T:C	Affx-79443430	0.02318	-0.0056636	0.016931	0.738	4079_irnt		MT:4646:T:C	Affx-79443430	0.02318	-0.0056607	0.016931	0.73813	4079_irnt		MT:4646:T:C	Affx-79443430	0.02318	-0.0056607	0.016931	NA	0.73813	4079_irnt
MT:4646:T:C	Affx-79443430	0.02318	0.0030326	0.016032	0.84996	4080_irnt		MT:4646:T:C	Affx-79443430	0.02318	0.0030408	0.016033	0.84958	4080_irnt		MT:4646:T:C	Affx-79443430	0.02318	0.0030408	0.016033	NA	0.84958	4080_irnt
MT:4646:T:C	Affx-79443430	0.02318	0.00044675	0.0034756	0.89772	C3_SKIN		MT:4646:T:C	Affx-79443430	0.02318	0.00044608	0.0034756	0.89788	C3_SKIN		MT:4646:T:C	Affx-79443430	0.02318	0.016896	NA	0.043937	0.83397	C3_SKIN
MT:4646:T:C	Affx-79443430	0.02318	0.00035724	0.0029632	0.90404	H26		MT:4646:T:C	Affx-79443430	0.02318	0.00035749	0.0029632	0.90398	H26		MT:4646:T:C	Affx-79443430	0.02318	0.023459	NA	0.059641	0.80706	H26
MT:4646:T:C	Affx-79443430	0.02318	0.0049898	0.00274	0.068591	I9_CHD		MT:4646:T:C	Affx-79443430	0.02318	0.0049923	0.0027403	0.068487	I9_CHD		MT:4646:T:C	Affx-79443430	0.02318	0.16543	NA	3.2377	0.071962	I9_CHD
MT:4646:T:C	Affx-79443430	0.02318	0.0032123	0.0038217	0.4006	I9_IHD		MT:4646:T:C	Affx-79443430	0.02318	0.0032164	0.0038224	0.40008	I9_IHD		MT:4646:T:C	Affx-79443430	0.02318	0.062021	NA	0.77295	0.37931	I9_IHD
MT:4646:T:C	Affx-79443430	0.02318	0.0016721	0.0029162	0.5664	K21		MT:4646:T:C	Affx-79443430	0.02318	0.0016731	0.0029163	0.56616	K21		MT:4646:T:C	Affx-79443430	0.02318	0.060886	NA	0.42401	0.51494	K21
MT:4646:T:C	Affx-79443430	0.02318	-0.00442	0.0025285	0.080449	K44		MT:4646:T:C	Affx-79443430	0.02318	-0.0044192	0.0025285	0.08051	K44		MT:4646:T:C	Affx-79443430	0.02318	-0.22886	NA	3.1052	0.078042	K44
MT:4646:T:C	Affx-79443430	0.02318	-0.0016828	0.0031343	0.59133	K57		MT:4646:T:C	Affx-79443430	0.02318	-0.0016815	0.0031343	0.59163	K57		MT:4646:T:C	Affx-79443430	0.02318	-0.04173	NA	0.19989	0.65481	K57
MT:4769:A:G	Affx-34462075	0.97439	0.0035172	0.0022432	0.11688	20002_1065		MT:4769:A:G	Affx-34462075	0.97439	0.003536	0.0022434	0.11498	20002_1065		MT:4769:A:G	Affx-34462075	0.97439	0.01969	NA	2.4977	0.11401	20002_1065
MT:4769:A:G	Affx-34462075	0.97439	0.001198	0.00090874	0.18742	20002_1074		MT:4769:A:G	Affx-34462075	0.97439	0.001206	0.00090887	0.18454	20002_1074		MT:4769:A:G	Affx-34462075	0.97439	0.03999	NA	1.6232	0.20265	20002_1074
MT:4769:A:G	Affx-34462075	0.97439	-0.0001344	0.0014347	0.92536	20002_1465		MT:4769:A:G	Affx-34462075	0.97439	-0.00012583	0.0014347	0.93011	20002_1465		MT:4769:A:G	Affx-34462075	0.97439	-0.0017456	NA	0.0080824	0.92837	20002_1465
MT:4769:A:G	Affx-34462075	0.97439	0.0017632	0.001681	0.29423	20002_1473		MT:4769:A:G	Affx-34462075	0.97439	0.001779	0.0016812	0.29	20002_1473		MT:4769:A:G	Affx-34462075	0.97439	0.017526	NA	1.1075	0.29263	20002_1473
MT:4769:A:G	Affx-34462075	0.97439	-0.00017743	0.0011203	0.87416	2443		MT:4769:A:G	Affx-34462075	0.97439	-0.00016392	0.0011206	0.88371	2443		MT:4769:A:G	Affx-34462075	0.97439	-0.0042479	NA	0.029355	0.86396	2443
MT:4769:A:G	Affx-34462075	0.97439	-0.0042355	0.0051207	0.40816	30650_irnt		MT:4769:A:G	Affx-34462075	0.97439	-0.004238	0.0051207	0.40788	30650_irnt		MT:4769:A:G	Affx-34462075	0.97439	-0.004238	0.0051207	NA	0.40788	30650_irnt
MT:4769:A:G	Affx-34462075	0.97439	-0.01135	0.0043391	0.0089042	30700_irnt		MT:4769:A:G	Affx-34462075	0.97439	-0.011362	0.0043392	0.0088345	30700_irnt		MT:4769:A:G	Affx-34462075	0.97439	-0.011362	0.0043392	NA	0.0088345	30700_irnt
MT:4769:A:G	Affx-34462075	0.97439	-0.0054427	0.0055671	0.32825	30740_irnt		MT:4769:A:G	Affx-34462075	0.97439	-0.0054248	0.0055672	0.32985	30740_irnt		MT:4769:A:G	Affx-34462075	0.97439	-0.0054248	0.0055672	NA	0.32985	30740_irnt
MT:4769:A:G	Affx-34462075	0.97439	0.0058924	0.0050953	0.2475	30760_irnt		MT:4769:A:G	Affx-34462075	0.97439	0.0058242	0.0050975	0.25323	30760_irnt		MT:4769:A:G	Affx-34462075	0.97439	0.0058242	0.0050975	NA	0.25323	30760_irnt
MT:4769:A:G	Affx-34462075	0.97439	0.0041731	0.0052746	0.42884	30780_irnt		MT:4769:A:G	Affx-34462075	0.97439	0.0041676	0.0052746	0.42945	30780_irnt		MT:4769:A:G	Affx-34462075	0.97439	0.0041676	0.0052746	NA	0.42945	30780_irnt
MT:4769:A:G	Affx-34462075	0.97439	0.0016866	0.0051915	0.74527	30870_irnt		MT:4769:A:G	Affx-34462075	0.97439	0.001743	0.0051942	0.73719	30870_irnt		MT:4769:A:G	Affx-34462075	0.97439	0.001743	0.0051942	NA	0.73719	30870_irnt
MT:4769:A:G	Affx-34462075	0.97439	-0.0089931	0.0067431	0.18231	3148_irnt		MT:4769:A:G	Affx-34462075	0.97439	-0.0091215	0.0067433	0.17616	3148_irnt		MT:4769:A:G	Affx-34462075	0.97439	-0.0091215	0.0067433	NA	0.17616	3148_irnt
MT:4769:A:G	Affx-34462075	0.97439	0.00028437	0.0014487	0.84438	3393		MT:4769:A:G	Affx-34462075	0.97439	0.00028453	0.0014487	0.84429	3393		MT:4769:A:G	Affx-34462075	0.97439	0.0046512	NA	0.021794	0.88264	3393
MT:4769:A:G	Affx-34462075	0.97439	0.00035797	0.005311	0.94626	4079_irnt		MT:4769:A:G	Affx-34462075	0.97439	0.00037547	0.0053111	0.94364	4079_irnt		MT:4769:A:G	Affx-34462075	0.97439	0.00037547	0.0053111	NA	0.94364	4079_irnt
MT:4769:A:G	Affx-34462075	0.97439	0.006408	0.0050289	0.20258	4080_irnt		MT:4769:A:G	Affx-34462075	0.97439	0.0064587	0.0050293	0.19907	4080_irnt		MT:4769:A:G	Affx-34462075	0.97439	0.0064587	0.0050293	NA	0.19907	4080_irnt
MT:4769:A:G	Affx-34462075	0.97439	-0.00055991	0.0010948	0.60906	C3_SKIN		MT:4769:A:G	Affx-34462075	0.97439	-0.00056194	0.0010948	0.60777	C3_SKIN		MT:4769:A:G	Affx-34462075	0.97439	-0.013932	NA	0.30476	0.58092	C3_SKIN
MT:4769:A:G	Affx-34462075	0.97439	0.00097281	0.00093343	0.29732	H26		MT:4769:A:G	Affx-34462075	0.97439	0.00097357	0.00093342	0.29694	H26		MT:4769:A:G	Affx-34462075	0.97439	0.0295	NA	0.94921	0.32992	H26
MT:4769:A:G	Affx-34462075	0.97439	0.00029879	0.00070974	0.67376	I48		MT:4769:A:G	Affx-34462075	0.97439	0.00030068	0.00070974	0.67183	I48		MT:4769:A:G	Affx-34462075	0.97439	0.014982	NA	0.14441	0.70394	I48
MT:4769:A:G	Affx-34462075	0.97439	-0.00059507	0.00086311	0.49055	I9_CHD		MT:4769:A:G	Affx-34462075	0.97439	-0.00058758	0.00086322	0.49607	I9_CHD		MT:4769:A:G	Affx-34462075	0.97439	-0.023684	NA	0.55347	0.4569	I9_CHD
MT:4769:A:G	Affx-34462075	0.97439	0.00083983	0.0012038	0.48542	I9_IHD		MT:4769:A:G	Affx-34462075	0.97439	0.00085295	0.0012041	0.4787	I9_IHD		MT:4769:A:G	Affx-34462075	0.97439	0.015161	NA	0.42392	0.51499	I9_IHD
MT:4769:A:G	Affx-34462075	0.97439	-0.00079107	0.00091863	0.38916	K21		MT:4769:A:G	Affx-34462075	0.97439	-0.00078795	0.00091864	0.39104	K21		MT:4769:A:G	Affx-34462075	0.97439	-0.02622	NA	0.77345	0.37915	K21
MT:4769:A:G	Affx-34462075	0.97439	-0.00011615	0.00079648	0.88405	K44		MT:4769:A:G	Affx-34462075	0.97439	-0.00011366	0.00079649	0.88653	K44		MT:4769:A:G	Affx-34462075	0.97439	-0.0070013	NA	0.040381	0.84074	K44
MT:4769:A:G	Affx-34462075	0.97439	-0.0012568	0.00098731	0.20302	K57		MT:4769:A:G	Affx-34462075	0.97439	-0.0012528	0.00098733	0.20447	K57		MT:4769:A:G	Affx-34462075	0.97439	-0.035979	NA	1.6926	0.19326	K57
MT:4793:A:G	Affx-89025751	0.013489	0.0017317	0.0030712	0.57286	20002_1065		MT:4793:A:G	Affx-89025751	0.013489	0.0017127	0.0030716	0.57712	20002_1065		MT:4793:A:G	Affx-89025751	0.013489	0.009567	NA	0.31946	0.57193	20002_1065
MT:4793:A:G	Affx-89025751	0.013489	0.00057246	0.0012442	0.64544	20002_1074		MT:4793:A:G	Affx-89025751	0.013489	0.00056429	0.0012444	0.65021	20002_1074		MT:4793:A:G	Affx-89025751	0.013489	0.016993	NA	0.16897	0.68103	20002_1074
MT:4793:A:G	Affx-89025751	0.013489	0.0027069	0.0019643	0.16819	20002_1465		MT:4793:A:G	Affx-89025751	0.013489	0.0026983	0.0019644	0.16957	20002_1465		MT:4793:A:G	Affx-89025751	0.013489	0.036261	NA	1.9452	0.16311	20002_1465
MT:4793:A:G	Affx-89025751	0.013489	-0.0024637	0.0023015	0.28441	20002_1473		MT:4793:A:G	Affx-89025751	0.013489	-0.0024796	0.0023019	0.28139	20002_1473		MT:4793:A:G	Affx-89025751	0.013489	-0.024382	NA	1.135	0.28672	20002_1473
MT:4793:A:G	Affx-89025751	0.013489	0.0017225	0.0015341	0.26153	2443		MT:4793:A:G	Affx-89025751	0.013489	0.0017074	0.0015345	0.26587	2443		MT:4793:A:G	Affx-89025751	0.013489	0.037388	NA	1.2571	0.26221	2443
MT:4793:A:G	Affx-89025751	0.013489	-0.0092287	0.0070233	0.18884	30650_irnt		MT:4793:A:G	Affx-89025751	0.013489	-0.0092312	0.0070233	0.18872	30650_irnt		MT:4793:A:G	Affx-89025751	0.013489	-0.0092312	0.0070233	NA	0.18872	30650_irnt
MT:4793:A:G	Affx-89025751	0.013489	0.0049099	0.0059482	0.40912	30700_irnt		MT:4793:A:G	Affx-89025751	0.013489	0.0049007	0.0059484	0.41001	30700_irnt		MT:4793:A:G	Affx-89025751	0.013489	0.0049007	0.0059484	NA	0.41001	30700_irnt
MT:4793:A:G	Affx-89025751	0.013489	0.0093028	0.0076212	0.22222	30740_irnt		MT:4793:A:G	Affx-89025751	0.013489	0.0094113	0.0076205	0.21683	30740_irnt		MT:4793:A:G	Affx-89025751	0.013489	0.0094113	0.0076205	NA	0.21683	30740_irnt
MT:4793:A:G	Affx-89025751	0.013489	-0.00042811	0.0069791	0.95109	30760_irnt		MT:4793:A:G	Affx-89025751	0.013489	-0.00047957	0.0069813	0.94523	30760_irnt		MT:4793:A:G	Affx-89025751	0.013489	-0.00047957	0.0069813	NA	0.94523	30760_irnt
MT:4793:A:G	Affx-89025751	0.013489	-0.0079438	0.007231	0.27195	30780_irnt		MT:4793:A:G	Affx-89025751	0.013489	-0.0079452	0.007231	0.27187	30780_irnt		MT:4793:A:G	Affx-89025751	0.013489	-0.0079452	0.007231	NA	0.27187	30780_irnt
MT:4793:A:G	Affx-89025751	0.013489	-0.0097916	0.0071185	0.16897	30870_irnt		MT:4793:A:G	Affx-89025751	0.013489	-0.0097452	0.0071222	0.17123	30870_irnt		MT:4793:A:G	Affx-89025751	0.013489	-0.0097452	0.0071222	NA	0.17123	30870_irnt
MT:4793:A:G	Affx-89025751	0.013489	-0.0042718	0.0093917	0.64922	3148_irnt		MT:4793:A:G	Affx-89025751	0.013489	-0.004189	0.009392	0.65559	3148_irnt		MT:4793:A:G	Affx-89025751	0.013489	-0.004189	0.009392	NA	0.65559	3148_irnt
MT:4793:A:G	Affx-89025751	0.013489	-0.0011642	0.0019977	0.56007	3393		MT:4793:A:G	Affx-89025751	0.013489	-0.0011641	0.0019977	0.5601	3393		MT:4793:A:G	Affx-89025751	0.013489	-0.027421	NA	0.39385	0.53028	3393
MT:4793:A:G	Affx-89025751	0.013489	-0.0049605	0.0073093	0.49735	4079_irnt		MT:4793:A:G	Affx-89025751	0.013489	-0.0049479	0.0073094	0.49846	4079_irnt		MT:4793:A:G	Affx-89025751	0.013489	-0.0049479	0.0073094	NA	0.49846	4079_irnt
MT:4793:A:G	Affx-89025751	0.013489	-0.0029631	0.0069211	0.66856	4080_irnt		MT:4793:A:G	Affx-89025751	0.013489	-0.0029392	0.0069216	0.67109	4080_irnt		MT:4793:A:G	Affx-89025751	0.013489	-0.0029392	0.0069216	NA	0.67109	4080_irnt
MT:4793:A:G	Affx-89025751	0.013489	0.0031583	0.001499	0.035119	C3_SKIN		MT:4793:A:G	Affx-89025751	0.013489	0.0031604	0.001499	0.035002	C3_SKIN		MT:4793:A:G	Affx-89025751	0.013489	0.069116	NA	4.2987	0.038142	C3_SKIN
MT:4793:A:G	Affx-89025751	0.013489	-0.0013341	0.001278	0.29654	H26		MT:4793:A:G	Affx-89025751	0.013489	-0.0013348	0.001278	0.29627	H26		MT:4793:A:G	Affx-89025751	0.013489	-0.044131	NA	1.1248	0.28888	H26
MT:4793:A:G	Affx-89025751	0.013489	0.00055177	0.00097175	0.57016	I48		MT:4793:A:G	Affx-89025751	0.013489	0.00054988	0.00097175	0.57149	I48		MT:4793:A:G	Affx-89025751	0.013489	0.031184	NA	0.35152	0.55325	I48
MT:4793:A:G	Affx-89025751	0.013489	2.304e-05	0.0011817	0.98445	I9_CHD		MT:4793:A:G	Affx-89025751	0.013489	1.5535e-05	0.0011819	0.98951	I9_CHD		MT:4793:A:G	Affx-89025751	0.013489	0.00043656	NA	9.832e-05	0.99209	I9_CHD
MT:4793:A:G	Affx-89025751	0.013489	0.0010772	0.0016483	0.51341	I9_IHD		MT:4793:A:G	Affx-89025751	0.013489	0.0010639	0.0016486	0.51869	I9_IHD		MT:4793:A:G	Affx-89025751	0.013489	0.019314	NA	0.38128	0.53692	I9_IHD
MT:4793:A:G	Affx-89025751	0.013489	0.00022141	0.0012577	0.86027	K21		MT:4793:A:G	Affx-89025751	0.013489	0.00021828	0.0012578	0.86222	K21		MT:4793:A:G	Affx-89025751	0.013489	0.0087323	NA	0.044933	0.83213	K21
MT:4793:A:G	Affx-89025751	0.013489	0.0031452	0.0010905	0.0039241	K44		MT:4793:A:G	Affx-89025751	0.013489	0.0031427	0.0010905	0.0039532	K44		MT:4793:A:G	Affx-89025751	0.013489	0.12396	NA	7.8755	0.005011	K44
MT:4793:A:G	Affx-89025751	0.013489	0.0016197	0.0013518	0.23084	K57		MT:4793:A:G	Affx-89025751	0.013489	0.0016157	0.0013518	0.23201	K57		MT:4793:A:G	Affx-89025751	0.013489	0.044896	NA	1.4415	0.2299	K57
MT:4820:G:A	Affx-79381669	0.0016974	-0.0057828	0.0091249	0.52625	20002_1065		MT:4820:G:A	Affx-79381669	0.0016974	-0.0057915	0.0091259	0.52567	20002_1065		MT:4820:G:A	Affx-79381669	0.0016974	-0.031398	NA	0.37825	0.53854	20002_1065
MT:4820:G:A	Affx-79381669	0.0016974	0.012509	0.005836	0.032075	20002_1465		MT:4820:G:A	Affx-79381669	0.0016974	0.012506	0.0058363	0.032128	20002_1465		MT:4820:G:A	Affx-79381669	0.0016974	0.15493	NA	4.4929	0.034036	20002_1465
MT:4820:G:A	Affx-79381669	0.0016974	5.1392e-05	0.006838	0.994	20002_1473		MT:4820:G:A	Affx-79381669	0.0016974	4.5631e-05	0.0068391	0.99468	20002_1473		MT:4820:G:A	Affx-79381669	0.0016974	0.0037497	NA	0.0030665	0.95584	20002_1473
MT:4820:G:A	Affx-79381669	0.0016974	-0.00078441	0.0045514	0.86316	2443		MT:4820:G:A	Affx-79381669	0.0016974	-0.00079237	0.0045527	0.86183	2443		MT:4820:G:A	Affx-79381669	0.0016974	-0.0089703	NA	0.0077236	0.92997	2443
MT:4820:G:A	Affx-79381669	0.0016974	0.022292	0.020791	0.28363	30650_irnt		MT:4820:G:A	Affx-79381669	0.0016974	0.022292	0.020791	0.28363	30650_irnt		MT:4820:G:A	Affx-79381669	0.0016974	0.022292	0.020791	NA	0.28363	30650_irnt
MT:4820:G:A	Affx-79381669	0.0016974	-0.021067	0.017628	0.23205	30700_irnt		MT:4820:G:A	Affx-79381669	0.0016974	-0.021059	0.017628	0.23223	30700_irnt		MT:4820:G:A	Affx-79381669	0.0016974	-0.021059	0.017628	NA	0.23223	30700_irnt
MT:4820:G:A	Affx-79381669	0.0016974	0.021914	0.022729	0.33498	30740_irnt		MT:4820:G:A	Affx-79381669	0.0016974	0.021908	0.022729	0.33511	30740_irnt		MT:4820:G:A	Affx-79381669	0.0016974	0.021908	0.022729	NA	0.33511	30740_irnt
MT:4820:G:A	Affx-79381669	0.0016974	-0.031255	0.020768	0.13233	30760_irnt		MT:4820:G:A	Affx-79381669	0.0016974	-0.031238	0.020777	0.1327	30760_irnt		MT:4820:G:A	Affx-79381669	0.0016974	-0.031238	0.020777	NA	0.1327	30760_irnt
MT:4820:G:A	Affx-79381669	0.0016974	0.018682	0.021404	0.38275	30780_irnt		MT:4820:G:A	Affx-79381669	0.0016974	0.018688	0.021404	0.38261	30780_irnt		MT:4820:G:A	Affx-79381669	0.0016974	0.018688	0.021404	NA	0.38261	30780_irnt
MT:4820:G:A	Affx-79381669	0.0016974	0.043002	0.021089	0.041446	30870_irnt		MT:4820:G:A	Affx-79381669	0.0016974	0.042969	0.0211	0.041709	30870_irnt		MT:4820:G:A	Affx-79381669	0.0016974	0.042969	0.0211	NA	0.041709	30870_irnt
MT:4820:G:A	Affx-79381669	0.0016974	0.034041	0.027307	0.21254	3148_irnt		MT:4820:G:A	Affx-79381669	0.0016974	0.03405	0.027308	0.21244	3148_irnt		MT:4820:G:A	Affx-79381669	0.0016974	0.03405	0.027308	NA	0.21244	3148_irnt
MT:4820:G:A	Affx-79381669	0.0016974	0.027525	0.021764	0.20597	4079_irnt		MT:4820:G:A	Affx-79381669	0.0016974	0.027527	0.021764	0.20595	4079_irnt		MT:4820:G:A	Affx-79381669	0.0016974	0.027527	0.021764	NA	0.20595	4079_irnt
MT:4820:G:A	Affx-79381669	0.0016974	0.032063	0.020608	0.11974	4080_irnt		MT:4820:G:A	Affx-79381669	0.0016974	0.032053	0.020609	0.11988	4080_irnt		MT:4820:G:A	Affx-79381669	0.0016974	0.032053	0.020609	NA	0.11988	4080_irnt
MT:4820:G:A	Affx-79381669	0.0016974	-0.0016512	0.0044541	0.71086	C3_SKIN		MT:4820:G:A	Affx-79381669	0.0016974	-0.0016503	0.0044541	0.711	C3_SKIN		MT:4820:G:A	Affx-79381669	0.0016974	-0.028692	NA	0.073837	0.78583	C3_SKIN
MT:4820:G:A	Affx-79381669	0.0016974	-0.0052559	0.0048976	0.2832	I9_IHD		MT:4820:G:A	Affx-79381669	0.0016974	-0.005263	0.0048985	0.28264	I9_IHD		MT:4820:G:A	Affx-79381669	0.0016974	-0.098772	NA	0.99326	0.31895	I9_IHD
MT:4824:A:G	Affx-79381670	0.0010282	-0.0056544	0.011714	0.62931	20002_1065		MT:4824:A:G	Affx-79381670	0.0010282	-0.0056612	0.011715	0.62893	20002_1065		MT:4824:A:G	Affx-79381670	0.0010282	-0.028869	NA	0.19625	0.65777	20002_1065
MT:4824:A:G	Affx-79381670	0.0010282	0.0012669	0.0074919	0.86572	20002_1465		MT:4824:A:G	Affx-79381670	0.0010282	0.001264	0.0074924	0.86603	20002_1465		MT:4824:A:G	Affx-79381670	0.0010282	0.024495	NA	0.06212	0.80318	20002_1465
MT:4824:A:G	Affx-79381670	0.0010282	-0.014394	0.0087783	0.10106	20002_1473		MT:4824:A:G	Affx-79381670	0.0010282	-0.0144	0.0087796	0.10098	20002_1473		MT:4824:A:G	Affx-79381670	0.0010282	-0.14713	NA	2.5908	0.10749	20002_1473
MT:4824:A:G	Affx-79381670	0.0010282	-0.0025946	0.0266	0.9223	30650_irnt		MT:4824:A:G	Affx-79381670	0.0010282	-0.0025939	0.0266	0.92232	30650_irnt		MT:4824:A:G	Affx-79381670	0.0010282	-0.0025939	0.0266	NA	0.92232	30650_irnt
MT:4824:A:G	Affx-79381670	0.0010282	0.025033	0.022539	0.26672	30700_irnt		MT:4824:A:G	Affx-79381670	0.0010282	0.025039	0.02254	0.26663	30700_irnt		MT:4824:A:G	Affx-79381670	0.0010282	0.025039	0.02254	NA	0.26663	30700_irnt
MT:4824:A:G	Affx-79381670	0.0010282	-0.028667	0.028815	0.31981	30740_irnt		MT:4824:A:G	Affx-79381670	0.0010282	-0.028679	0.028816	0.31962	30740_irnt		MT:4824:A:G	Affx-79381670	0.0010282	-0.028679	0.028816	NA	0.31962	30740_irnt
MT:4824:A:G	Affx-79381670	0.0010282	-0.015106	0.02643	0.56762	30760_irnt		MT:4824:A:G	Affx-79381670	0.0010282	-0.015057	0.026441	0.56905	30760_irnt		MT:4824:A:G	Affx-79381670	0.0010282	-0.015057	0.026441	NA	0.56905	30760_irnt
MT:4824:A:G	Affx-79381670	0.0010282	-0.00075128	0.027454	0.97817	30780_irnt		MT:4824:A:G	Affx-79381670	0.0010282	-0.00074807	0.027454	0.97826	30780_irnt		MT:4824:A:G	Affx-79381670	0.0010282	-0.00074807	0.027454	NA	0.97826	30780_irnt
MT:4824:A:G	Affx-79381670	0.0010282	-0.011293	0.027007	0.67583	30870_irnt		MT:4824:A:G	Affx-79381670	0.0010282	-0.011319	0.027021	0.67529	30870_irnt		MT:4824:A:G	Affx-79381670	0.0010282	-0.011319	0.027021	NA	0.67529	30870_irnt
MT:4824:A:G	Affx-79381670	0.0010282	-0.064753	0.03561	0.069007	3148_irnt		MT:4824:A:G	Affx-79381670	0.0010282	-0.064728	0.035612	0.069125	3148_irnt		MT:4824:A:G	Affx-79381670	0.0010282	-0.064728	0.035612	NA	0.069125	3148_irnt
MT:4824:A:G	Affx-79381670	0.0010282	-0.020619	0.02718	0.44807	4079_irnt		MT:4824:A:G	Affx-79381670	0.0010282	-0.020621	0.02718	0.44805	4079_irnt		MT:4824:A:G	Affx-79381670	0.0010282	-0.020621	0.02718	NA	0.44805	4079_irnt
MT:4824:A:G	Affx-79381670	0.0010282	-0.017495	0.025736	0.49664	4080_irnt		MT:4824:A:G	Affx-79381670	0.0010282	-0.017505	0.025738	0.49642	4080_irnt		MT:4824:A:G	Affx-79381670	0.0010282	-0.017505	0.025738	NA	0.49642	4080_irnt
MT:4883:C:T	Affx-34462083	0.00023601	-0.025958	0.023068	0.26048	20002_1065		MT:4883:C:T	Affx-34462083	0.00023601	-0.025603	0.02307	0.2671	20002_1065		MT:4883:C:T	Affx-34462083	0.00023601	-0.14679	NA	1.1923	0.27487	20002_1065
MT:4883:C:T	Affx-34462083	0.00023601	0.010114	0.051953	0.84565	30650_irnt		MT:4883:C:T	Affx-34462083	0.00023601	0.0099772	0.051953	0.84771	30650_irnt		MT:4883:C:T	Affx-34462083	0.00023601	0.0099772	0.051953	NA	0.84771	30650_irnt
MT:4883:C:T	Affx-34462083	0.00023601	-0.00039602	0.044092	0.99283	30700_irnt		MT:4883:C:T	Affx-34462083	0.00023601	-0.00080357	0.044093	0.98546	30700_irnt		MT:4883:C:T	Affx-34462083	0.00023601	-0.00080357	0.044093	NA	0.98546	30700_irnt
MT:4883:C:T	Affx-34462083	0.00023601	0.029522	0.057302	0.60642	30740_irnt		MT:4883:C:T	Affx-34462083	0.00023601	0.030125	0.057303	0.59909	30740_irnt		MT:4883:C:T	Affx-34462083	0.00023601	0.030125	0.057303	NA	0.59909	30740_irnt
MT:4883:C:T	Affx-34462083	0.00023601	0.018326	0.052468	0.72688	30760_irnt		MT:4883:C:T	Affx-34462083	0.00023601	0.015962	0.052491	0.76105	30760_irnt		MT:4883:C:T	Affx-34462083	0.00023601	0.015962	0.052491	NA	0.76105	30760_irnt
MT:4883:C:T	Affx-34462083	0.00023601	-0.055587	0.053537	0.29913	30780_irnt		MT:4883:C:T	Affx-34462083	0.00023601	-0.055746	0.053537	0.29775	30780_irnt		MT:4883:C:T	Affx-34462083	0.00023601	-0.055746	0.053537	NA	0.29775	30780_irnt
MT:4883:C:T	Affx-34462083	0.00023601	-0.047013	0.052749	0.3728	30870_irnt		MT:4883:C:T	Affx-34462083	0.00023601	-0.045103	0.052777	0.39277	30870_irnt		MT:4883:C:T	Affx-34462083	0.00023601	-0.045103	0.052777	NA	0.39277	30870_irnt
MT:4883:C:T	Affx-34462083	0.00023601	0.081982	0.073622	0.26547	3148_irnt		MT:4883:C:T	Affx-34462083	0.00023601	0.081806	0.073625	0.26652	3148_irnt		MT:4883:C:T	Affx-34462083	0.00023601	0.081806	0.073625	NA	0.26652	3148_irnt
MT:4883:C:T	Affx-34462083	0.00023601	0.039036	0.053753	0.46771	4079_irnt		MT:4883:C:T	Affx-34462083	0.00023601	0.039231	0.053753	0.46549	4079_irnt		MT:4883:C:T	Affx-34462083	0.00023601	0.039231	0.053753	NA	0.46549	4079_irnt
MT:4883:C:T	Affx-34462083	0.00023601	-0.029489	0.050898	0.56233	4080_irnt		MT:4883:C:T	Affx-34462083	0.00023601	-0.029001	0.050902	0.56885	4080_irnt		MT:4883:C:T	Affx-34462083	0.00023601	-0.029001	0.050902	NA	0.56885	4080_irnt
MT:4917:A:G	Affx-79381671	0.09888	0.0018288	0.0011875	0.12356	20002_1065		MT:4917:A:G	Affx-79381671	0.09888	0.0018269	0.0011877	0.12399	20002_1065		MT:4917:A:G	Affx-79381671	0.09888	0.010149	NA	2.4002	0.12132	20002_1065
MT:4917:A:G	Affx-79381671	0.09888	0.0007772	0.00048109	0.1062	20002_1074		MT:4917:A:G	Affx-79381671	0.09888	0.0007754	0.00048115	0.10706	20002_1074		MT:4917:A:G	Affx-79381671	0.09888	0.026828	NA	2.7969	0.094446	20002_1074
MT:4917:A:G	Affx-79381671	0.09888	-0.0003293	0.00075951	0.6646	20002_1465		MT:4917:A:G	Affx-79381671	0.09888	-0.00032964	0.00075955	0.6643	20002_1465		MT:4917:A:G	Affx-79381671	0.09888	-0.0042195	NA	0.16796	0.68193	20002_1465
MT:4917:A:G	Affx-79381671	0.09888	-0.00013904	0.00088992	0.87585	20002_1473		MT:4917:A:G	Affx-79381671	0.09888	-0.00013965	0.00089005	0.87532	20002_1473		MT:4917:A:G	Affx-79381671	0.09888	-0.0010123	NA	0.013346	0.90803	20002_1473
MT:4917:A:G	Affx-79381671	0.09888	-0.00030468	0.00059313	0.60747	2443		MT:4917:A:G	Affx-79381671	0.09888	-0.00030657	0.0005933	0.60536	2443		MT:4917:A:G	Affx-79381671	0.09888	-0.0064386	NA	0.23724	0.6262	2443
MT:4917:A:G	Affx-79381671	0.09888	0.0039496	0.0027116	0.14523	30650_irnt		MT:4917:A:G	Affx-79381671	0.09888	0.003946	0.0027116	0.1456	30650_irnt		MT:4917:A:G	Affx-79381671	0.09888	0.003946	0.0027116	NA	0.1456	30650_irnt
MT:4917:A:G	Affx-79381671	0.09888	-0.0052371	0.0022974	0.022631	30700_irnt		MT:4917:A:G	Affx-79381671	0.09888	-0.0052419	0.0022974	0.022513	30700_irnt		MT:4917:A:G	Affx-79381671	0.09888	-0.0052419	0.0022974	NA	0.022513	30700_irnt
MT:4917:A:G	Affx-79381671	0.09888	0.0048576	0.002946	0.099169	30740_irnt		MT:4917:A:G	Affx-79381671	0.09888	0.0048603	0.002946	0.098984	30740_irnt		MT:4917:A:G	Affx-79381671	0.09888	0.0048603	0.002946	NA	0.098984	30740_irnt
MT:4917:A:G	Affx-79381671	0.09888	-0.0018676	0.0026965	0.48855	30760_irnt		MT:4917:A:G	Affx-79381671	0.09888	-0.001878	0.0026976	0.48633	30760_irnt		MT:4917:A:G	Affx-79381671	0.09888	-0.001878	0.0026976	NA	0.48633	30760_irnt
MT:4917:A:G	Affx-79381671	0.09888	-0.00085868	0.0027916	0.75839	30780_irnt		MT:4917:A:G	Affx-79381671	0.09888	-0.00085958	0.0027916	0.75814	30780_irnt		MT:4917:A:G	Affx-79381671	0.09888	-0.00085958	0.0027916	NA	0.75814	30780_irnt
MT:4917:A:G	Affx-79381671	0.09888	0.0062203	0.0027489	0.023648	30870_irnt		MT:4917:A:G	Affx-79381671	0.09888	0.0062473	0.0027504	0.023121	30870_irnt		MT:4917:A:G	Affx-79381671	0.09888	0.0062473	0.0027504	NA	0.023121	30870_irnt
MT:4917:A:G	Affx-79381671	0.09888	-0.0001961	0.0035641	0.95612	3148_irnt		MT:4917:A:G	Affx-79381671	0.09888	-0.00021299	0.0035641	0.95235	3148_irnt		MT:4917:A:G	Affx-79381671	0.09888	-0.00021299	0.0035641	NA	0.95235	3148_irnt
MT:4917:A:G	Affx-79381671	0.09888	0.0014031	0.00077129	0.068889	3393		MT:4917:A:G	Affx-79381671	0.09888	0.0014009	0.00077129	0.069324	3393		MT:4917:A:G	Affx-79381671	0.09888	0.030564	NA	3.4491	0.063287	3393
MT:4917:A:G	Affx-79381671	0.09888	0.00033194	0.002817	0.9062	4079_irnt		MT:4917:A:G	Affx-79381671	0.09888	0.00033293	0.0028171	0.90592	4079_irnt		MT:4917:A:G	Affx-79381671	0.09888	0.00033293	0.0028171	NA	0.90592	4079_irnt
MT:4917:A:G	Affx-79381671	0.09888	0.0038034	0.0026675	0.15392	4080_irnt		MT:4917:A:G	Affx-79381671	0.09888	0.0037976	0.0026677	0.15457	4080_irnt		MT:4917:A:G	Affx-79381671	0.09888	0.0037976	0.0026677	NA	0.15457	4080_irnt
MT:4917:A:G	Affx-79381671	0.09888	0.00038591	0.00057965	0.50557	C3_SKIN		MT:4917:A:G	Affx-79381671	0.09888	0.00038605	0.00057965	0.50542	C3_SKIN		MT:4917:A:G	Affx-79381671	0.09888	0.0090432	NA	0.45498	0.49998	C3_SKIN
MT:4917:A:G	Affx-79381671	0.09888	0.00038405	0.0004942	0.43709	H26		MT:4917:A:G	Affx-79381671	0.09888	0.00038405	0.0004942	0.4371	H26		MT:4917:A:G	Affx-79381671	0.09888	0.01252	NA	0.63398	0.4259	H26
MT:4917:A:G	Affx-79381671	0.09888	-0.00025737	0.00037577	0.4934	I48		MT:4917:A:G	Affx-79381671	0.09888	-0.00025742	0.00037577	0.49332	I48		MT:4917:A:G	Affx-79381671	0.09888	-0.013836	NA	0.43816	0.50801	I48
MT:4917:A:G	Affx-79381671	0.09888	-0.00036275	0.00045697	0.42731	I9_CHD		MT:4917:A:G	Affx-79381671	0.09888	-0.00036301	0.00045703	0.42703	I9_CHD		MT:4917:A:G	Affx-79381671	0.09888	-0.012998	NA	0.57191	0.4495	I9_CHD
MT:4917:A:G	Affx-79381671	0.09888	0.00015282	0.00063737	0.81052	I9_IHD		MT:4917:A:G	Affx-79381671	0.09888	0.0001509	0.00063749	0.81288	I9_IHD		MT:4917:A:G	Affx-79381671	0.09888	0.003527	NA	0.083207	0.773	I9_IHD
MT:4917:A:G	Affx-79381671	0.09888	-0.00046672	0.00048636	0.33725	K21		MT:4917:A:G	Affx-79381671	0.09888	-0.00046677	0.00048637	0.33721	K21		MT:4917:A:G	Affx-79381671	0.09888	-0.015245	NA	0.88819	0.34597	K21
MT:4917:A:G	Affx-79381671	0.09888	0.00026225	0.00042169	0.53402	K44		MT:4917:A:G	Affx-79381671	0.09888	0.00026218	0.0004217	0.53413	K44		MT:4917:A:G	Affx-79381671	0.09888	0.011985	NA	0.42211	0.51589	K44
MT:4917:A:G	Affx-79381671	0.09888	0.0008233	0.00052273	0.11525	K57		MT:4917:A:G	Affx-79381671	0.09888	0.00082318	0.00052274	0.11532	K57		MT:4917:A:G	Affx-79381671	0.09888	0.023626	NA	2.5522	0.11014	K57
MT:5004:T:C	Affx-79381672	0.020818	0.0019262	0.002482	0.43771	20002_1065		MT:5004:T:C	Affx-79381672	0.020818	0.0019766	0.0024823	0.42587	20002_1065		MT:5004:T:C	Affx-79381672	0.020818	0.010878	NA	0.62961	0.4275	20002_1065
MT:5004:T:C	Affx-79381672	0.020818	-0.00022333	0.0010055	0.82423	20002_1074		MT:5004:T:C	Affx-79381672	0.020818	-0.00020504	0.0010056	0.83844	20002_1074		MT:5004:T:C	Affx-79381672	0.020818	-0.0060606	NA	0.031612	0.85888	20002_1074
MT:5004:T:C	Affx-79381672	0.020818	0.00086009	0.0015874	0.58794	20002_1465		MT:5004:T:C	Affx-79381672	0.020818	0.00088475	0.0015875	0.57731	20002_1465		MT:5004:T:C	Affx-79381672	0.020818	0.011609	NA	0.29542	0.58677	20002_1465
MT:5004:T:C	Affx-79381672	0.020818	0.001978	0.00186	0.28757	20002_1473		MT:5004:T:C	Affx-79381672	0.020818	0.0020235	0.0018602	0.2767	20002_1473		MT:5004:T:C	Affx-79381672	0.020818	0.019654	NA	1.1652	0.28039	20002_1473
MT:5004:T:C	Affx-79381672	0.020818	-0.00036792	0.0012395	0.76659	2443		MT:5004:T:C	Affx-79381672	0.020818	-0.00032883	0.0012398	0.79084	2443		MT:5004:T:C	Affx-79381672	0.020818	-0.0068724	NA	0.061593	0.804	2443
MT:5004:T:C	Affx-79381672	0.020818	0.0057553	0.0056842	0.3113	30650_irnt		MT:5004:T:C	Affx-79381672	0.020818	0.0057366	0.0056842	0.31287	30650_irnt		MT:5004:T:C	Affx-79381672	0.020818	0.0057366	0.0056842	NA	0.31287	30650_irnt
MT:5004:T:C	Affx-79381672	0.020818	0.0017396	0.0048139	0.71782	30700_irnt		MT:5004:T:C	Affx-79381672	0.020818	0.001686	0.0048141	0.72616	30700_irnt		MT:5004:T:C	Affx-79381672	0.020818	0.001686	0.0048141	NA	0.72616	30700_irnt
MT:5004:T:C	Affx-79381672	0.020818	0.0039096	0.0061926	0.52783	30740_irnt		MT:5004:T:C	Affx-79381672	0.020818	0.0039702	0.0061927	0.52146	30740_irnt		MT:5004:T:C	Affx-79381672	0.020818	0.0039702	0.0061927	NA	0.52146	30740_irnt
MT:5004:T:C	Affx-79381672	0.020818	0.012121	0.0056676	0.032464	30760_irnt		MT:5004:T:C	Affx-79381672	0.020818	0.011889	0.0056701	0.036008	30760_irnt		MT:5004:T:C	Affx-79381672	0.020818	0.011889	0.0056701	NA	0.036008	30760_irnt
MT:5004:T:C	Affx-79381672	0.020818	0.0030933	0.0058489	0.59689	30780_irnt		MT:5004:T:C	Affx-79381672	0.020818	0.0030729	0.0058488	0.59931	30780_irnt		MT:5004:T:C	Affx-79381672	0.020818	0.0030729	0.0058488	NA	0.59931	30780_irnt
MT:5004:T:C	Affx-79381672	0.020818	-0.0025486	0.0057608	0.6582	30870_irnt		MT:5004:T:C	Affx-79381672	0.020818	-0.0023022	0.0057638	0.68958	30870_irnt		MT:5004:T:C	Affx-79381672	0.020818	-0.0023022	0.0057638	NA	0.68958	30870_irnt
MT:5004:T:C	Affx-79381672	0.020818	0.0021151	0.007473	0.77716	3148_irnt		MT:5004:T:C	Affx-79381672	0.020818	0.0020658	0.0074733	0.78223	3148_irnt		MT:5004:T:C	Affx-79381672	0.020818	0.0020658	0.0074733	NA	0.78223	3148_irnt
MT:5004:T:C	Affx-79381672	0.020818	-0.00094488	0.0016148	0.55844	3393		MT:5004:T:C	Affx-79381672	0.020818	-0.00094615	0.0016148	0.55792	3393		MT:5004:T:C	Affx-79381672	0.020818	-0.01945	NA	0.30186	0.58272	3393
MT:5004:T:C	Affx-79381672	0.020818	0.011627	0.0058754	0.047826	4079_irnt		MT:5004:T:C	Affx-79381672	0.020818	0.011669	0.0058755	0.047038	4079_irnt		MT:5004:T:C	Affx-79381672	0.020818	0.011669	0.0058755	NA	0.047038	4079_irnt
MT:5004:T:C	Affx-79381672	0.020818	0.0057353	0.0055634	0.30259	4080_irnt		MT:5004:T:C	Affx-79381672	0.020818	0.0058328	0.0055638	0.29448	4080_irnt		MT:5004:T:C	Affx-79381672	0.020818	0.0058328	0.0055638	NA	0.29448	4080_irnt
MT:5004:T:C	Affx-79381672	0.020818	0.00096148	0.0012114	0.42736	C3_SKIN		MT:5004:T:C	Affx-79381672	0.020818	0.00095593	0.0012114	0.43003	C3_SKIN		MT:5004:T:C	Affx-79381672	0.020818	0.022663	NA	0.66402	0.41514	C3_SKIN
MT:5004:T:C	Affx-79381672	0.020818	-0.00045289	0.0010328	0.66102	H26		MT:5004:T:C	Affx-79381672	0.020818	-0.00045065	0.0010328	0.66259	H26		MT:5004:T:C	Affx-79381672	0.020818	-0.013552	NA	0.16483	0.68475	H26
MT:5004:T:C	Affx-79381672	0.020818	-0.00030666	0.00078529	0.69616	I48		MT:5004:T:C	Affx-79381672	0.020818	-0.00030127	0.00078529	0.70125	I48		MT:5004:T:C	Affx-79381672	0.020818	-0.015337	NA	0.12142	0.7275	I48
MT:5004:T:C	Affx-79381672	0.020818	-5.8347e-05	0.00095499	0.95128	I9_CHD		MT:5004:T:C	Affx-79381672	0.020818	-3.7069e-05	0.00095511	0.96904	I9_CHD		MT:5004:T:C	Affx-79381672	0.020818	-0.00050639	NA	0.00020071	0.9887	I9_CHD
MT:5004:T:C	Affx-79381672	0.020818	0.0009833	0.001332	0.46038	I9_IHD		MT:5004:T:C	Affx-79381672	0.020818	0.001016	0.0013322	0.44569	I9_IHD		MT:5004:T:C	Affx-79381672	0.020818	0.019738	NA	0.60403	0.43705	I9_IHD
MT:5004:T:C	Affx-79381672	0.020818	-0.0017115	0.0010164	0.092218	K21		MT:5004:T:C	Affx-79381672	0.020818	-0.0017024	0.0010164	0.093961	K21		MT:5004:T:C	Affx-79381672	0.020818	-0.057891	NA	2.7934	0.094652	K21
MT:5004:T:C	Affx-79381672	0.020818	-0.0018666	0.00088126	0.034171	K44		MT:5004:T:C	Affx-79381672	0.020818	-0.0018594	0.00088127	0.034868	K44		MT:5004:T:C	Affx-79381672	0.020818	-0.085198	NA	4.4665	0.034566	K44
MT:5004:T:C	Affx-79381672	0.020818	-1.2526e-06	0.0010924	0.99909	K57		MT:5004:T:C	Affx-79381672	0.020818	1.0205e-05	0.0010924	0.99255	K57		MT:5004:T:C	Affx-79381672	0.020818	0.0013373	NA	0.0018459	0.96573	K57
MT:5046:G:A	Affx-34462094	0.020266	0.00084131	0.0026662	0.75235	20002_1065		MT:5046:G:A	Affx-34462094	0.020266	0.00089675	0.0026663	0.73663	20002_1065		MT:5046:G:A	Affx-34462094	0.020266	0.0049973	NA	0.11568	0.73376	20002_1065
MT:5046:G:A	Affx-34462094	0.020266	0.0013861	0.0010801	0.1994	20002_1074		MT:5046:G:A	Affx-34462094	0.020266	0.0014595	0.0010802	0.17666	20002_1074		MT:5046:G:A	Affx-34462094	0.020266	0.047391	NA	1.8023	0.17943	20002_1074
MT:5046:G:A	Affx-34462094	0.020266	-0.00063739	0.0017052	0.70857	20002_1465		MT:5046:G:A	Affx-34462094	0.020266	-0.00064268	0.0017052	0.70626	20002_1465		MT:5046:G:A	Affx-34462094	0.020266	-0.0085525	NA	0.13802	0.71026	20002_1465
MT:5046:G:A	Affx-34462094	0.020266	0.0038774	0.001998	0.052307	20002_1473		MT:5046:G:A	Affx-34462094	0.020266	0.0038678	0.0019982	0.052908	20002_1473		MT:5046:G:A	Affx-34462094	0.020266	0.037442	NA	3.7576	0.052569	20002_1473
MT:5046:G:A	Affx-34462094	0.020266	0.0012017	0.0013313	0.36671	2443		MT:5046:G:A	Affx-34462094	0.020266	0.0012732	0.0013316	0.339	2443		MT:5046:G:A	Affx-34462094	0.020266	0.028302	NA	0.94828	0.33016	2443
MT:5046:G:A	Affx-34462094	0.020266	-0.011282	0.006089	0.063914	30650_irnt		MT:5046:G:A	Affx-34462094	0.020266	-0.01123	0.0060885	0.065127	30650_irnt		MT:5046:G:A	Affx-34462094	0.020266	-0.01123	0.0060885	NA	0.065127	30650_irnt
MT:5046:G:A	Affx-34462094	0.020266	0.0012875	0.0051601	0.80296	30700_irnt		MT:5046:G:A	Affx-34462094	0.020266	0.0012305	0.0051598	0.81151	30700_irnt		MT:5046:G:A	Affx-34462094	0.020266	0.0012305	0.0051598	NA	0.81151	30700_irnt
MT:5046:G:A	Affx-34462094	0.020266	0.0074263	0.0066359	0.2631	30740_irnt		MT:5046:G:A	Affx-34462094	0.020266	0.0074245	0.0066361	0.26322	30740_irnt		MT:5046:G:A	Affx-34462094	0.020266	0.0074245	0.0066361	NA	0.26322	30740_irnt
MT:5046:G:A	Affx-34462094	0.020266	-0.0058474	0.0060708	0.33545	30760_irnt		MT:5046:G:A	Affx-34462094	0.020266	-0.0058413	0.0060735	0.33617	30760_irnt		MT:5046:G:A	Affx-34462094	0.020266	-0.0058413	0.0060735	NA	0.33617	30760_irnt
MT:5046:G:A	Affx-34462094	0.020266	-0.0052159	0.0062675	0.4053	30780_irnt		MT:5046:G:A	Affx-34462094	0.020266	-0.0052989	0.0062671	0.39782	30780_irnt		MT:5046:G:A	Affx-34462094	0.020266	-0.0052989	0.0062671	NA	0.39782	30780_irnt
MT:5046:G:A	Affx-34462094	0.020266	0.0098709	0.0061743	0.10988	30870_irnt		MT:5046:G:A	Affx-34462094	0.020266	0.0099717	0.0061771	0.10646	30870_irnt		MT:5046:G:A	Affx-34462094	0.020266	0.0099717	0.0061771	NA	0.10646	30870_irnt
MT:5046:G:A	Affx-34462094	0.020266	-0.0025287	0.0079946	0.75178	3148_irnt		MT:5046:G:A	Affx-34462094	0.020266	-0.0025249	0.0079949	0.75215	3148_irnt		MT:5046:G:A	Affx-34462094	0.020266	-0.0025249	0.0079949	NA	0.75215	3148_irnt
MT:5046:G:A	Affx-34462094	0.020266	0.00074257	0.0017402	0.66959	3393		MT:5046:G:A	Affx-34462094	0.020266	0.00074291	0.0017402	0.66944	3393		MT:5046:G:A	Affx-34462094	0.020266	0.016909	NA	0.20862	0.64785	3393
MT:5046:G:A	Affx-34462094	0.020266	-0.00080472	0.0063201	0.89868	4079_irnt		MT:5046:G:A	Affx-34462094	0.020266	-0.0010018	0.0063197	0.87404	4079_irnt		MT:5046:G:A	Affx-34462094	0.020266	-0.0010018	0.0063197	NA	0.87404	4079_irnt
MT:5046:G:A	Affx-34462094	0.020266	0.0059169	0.0059844	0.3228	4080_irnt		MT:5046:G:A	Affx-34462094	0.020266	0.0057997	0.0059844	0.33248	4080_irnt		MT:5046:G:A	Affx-34462094	0.020266	0.0057997	0.0059844	NA	0.33248	4080_irnt
MT:5046:G:A	Affx-34462094	0.020266	-0.00093773	0.0013015	0.4712	C3_SKIN		MT:5046:G:A	Affx-34462094	0.020266	-0.00093943	0.0013014	0.47037	C3_SKIN		MT:5046:G:A	Affx-34462094	0.020266	-0.021643	NA	0.50162	0.47879	C3_SKIN
MT:5046:G:A	Affx-34462094	0.020266	-0.00011267	0.0011096	0.91912	H26		MT:5046:G:A	Affx-34462094	0.020266	-0.00011333	0.0011095	0.91864	H26		MT:5046:G:A	Affx-34462094	0.020266	-0.0027342	NA	0.0059091	0.93873	H26
MT:5046:G:A	Affx-34462094	0.020266	-0.00012825	0.00084369	0.87918	I48		MT:5046:G:A	Affx-34462094	0.020266	-0.00012961	0.00084364	0.8779	I48		MT:5046:G:A	Affx-34462094	0.020266	-0.0052184	NA	0.012468	0.91109	I48
MT:5046:G:A	Affx-34462094	0.020266	0.00068992	0.001026	0.50131	I9_CHD		MT:5046:G:A	Affx-34462094	0.020266	0.00068637	0.0010261	0.50354	I9_CHD		MT:5046:G:A	Affx-34462094	0.020266	0.026198	NA	0.48357	0.48681	I9_CHD
MT:5046:G:A	Affx-34462094	0.020266	0.00051405	0.0014311	0.71944	I9_IHD		MT:5046:G:A	Affx-34462094	0.020266	0.0005846	0.0014312	0.68293	I9_IHD		MT:5046:G:A	Affx-34462094	0.020266	0.011445	NA	0.17626	0.6746	I9_IHD
MT:5046:G:A	Affx-34462094	0.020266	0.00083963	0.001092	0.44196	K21		MT:5046:G:A	Affx-34462094	0.020266	0.00083683	0.0010919	0.44346	K21		MT:5046:G:A	Affx-34462094	0.020266	0.027839	NA	0.6211	0.43064	K21
MT:5046:G:A	Affx-34462094	0.020266	0.00062339	0.00094681	0.51028	K44		MT:5046:G:A	Affx-34462094	0.020266	0.00062168	0.00094675	0.5114	K44		MT:5046:G:A	Affx-34462094	0.020266	0.028107	NA	0.47344	0.49141	K44
MT:5046:G:A	Affx-34462094	0.020266	0.0014009	0.0011736	0.23262	K57		MT:5046:G:A	Affx-34462094	0.020266	0.0013982	0.0011736	0.2335	K57		MT:5046:G:A	Affx-34462094	0.020266	0.039026	NA	1.4242	0.23271	K57
MT:5147:G:A	Affx-89025778	0.057952	0.0027033	0.0015164	0.074623	20002_1065		MT:5147:G:A	Affx-89025778	0.057952	0.0027241	0.0015165	0.072451	20002_1065		MT:5147:G:A	Affx-89025778	0.057952	0.015035	NA	3.2427	0.071744	20002_1065
MT:5147:G:A	Affx-89025778	0.057952	0.00029278	0.0006143	0.63364	20002_1074		MT:5147:G:A	Affx-89025778	0.057952	0.00029962	0.00061439	0.62578	20002_1074		MT:5147:G:A	Affx-89025778	0.057952	0.011736	NA	0.32477	0.56875	20002_1074
MT:5147:G:A	Affx-89025778	0.057952	8.0154e-05	0.00096982	0.93413	20002_1465		MT:5147:G:A	Affx-89025778	0.057952	9.071e-05	0.00096987	0.92548	20002_1465		MT:5147:G:A	Affx-89025778	0.057952	0.0014706	NA	0.012562	0.91076	20002_1465
MT:5147:G:A	Affx-89025778	0.057952	0.00171	0.0011363	0.13238	20002_1473		MT:5147:G:A	Affx-89025778	0.057952	0.0017294	0.0011365	0.12809	20002_1473		MT:5147:G:A	Affx-89025778	0.057952	0.017161	NA	2.3885	0.12223	20002_1473
MT:5147:G:A	Affx-89025778	0.057952	-0.00030191	0.00075744	0.69019	2443		MT:5147:G:A	Affx-89025778	0.057952	-0.00028566	0.00075766	0.70616	2443		MT:5147:G:A	Affx-89025778	0.057952	-0.0058251	NA	0.11944	0.72965	2443
MT:5147:G:A	Affx-89025778	0.057952	0.0062647	0.0034622	0.070379	30650_irnt		MT:5147:G:A	Affx-89025778	0.057952	0.0062536	0.0034621	0.070874	30650_irnt		MT:5147:G:A	Affx-89025778	0.057952	0.0062536	0.0034621	NA	0.070874	30650_irnt
MT:5147:G:A	Affx-89025778	0.057952	-0.0053946	0.0029336	0.065927	30700_irnt		MT:5147:G:A	Affx-89025778	0.057952	-0.0054223	0.0029337	0.064558	30700_irnt		MT:5147:G:A	Affx-89025778	0.057952	-0.0054223	0.0029337	NA	0.064558	30700_irnt
MT:5147:G:A	Affx-89025778	0.057952	0.0023132	0.0037618	0.53862	30740_irnt		MT:5147:G:A	Affx-89025778	0.057952	0.0023438	0.0037619	0.53325	30740_irnt		MT:5147:G:A	Affx-89025778	0.057952	0.0023438	0.0037619	NA	0.53325	30740_irnt
MT:5147:G:A	Affx-89025778	0.057952	-0.0045883	0.0034433	0.18268	30760_irnt		MT:5147:G:A	Affx-89025778	0.057952	-0.0047071	0.0034447	0.1718	30760_irnt		MT:5147:G:A	Affx-89025778	0.057952	-0.0047071	0.0034447	NA	0.1718	30760_irnt
MT:5147:G:A	Affx-89025778	0.057952	-0.0007751	0.0035646	0.82786	30780_irnt		MT:5147:G:A	Affx-89025778	0.057952	-0.00078543	0.0035646	0.82561	30780_irnt		MT:5147:G:A	Affx-89025778	0.057952	-0.00078543	0.0035646	NA	0.82561	30780_irnt
MT:5147:G:A	Affx-89025778	0.057952	0.0095182	0.00351	0.0066944	30870_irnt		MT:5147:G:A	Affx-89025778	0.057952	0.0096519	0.0035119	0.0059897	30870_irnt		MT:5147:G:A	Affx-89025778	0.057952	0.0096519	0.0035119	NA	0.0059897	30870_irnt
MT:5147:G:A	Affx-89025778	0.057952	0.0056618	0.0045551	0.21388	3148_irnt		MT:5147:G:A	Affx-89025778	0.057952	0.005638	0.0045551	0.21581	3148_irnt		MT:5147:G:A	Affx-89025778	0.057952	0.005638	0.0045551	NA	0.21581	3148_irnt
MT:5147:G:A	Affx-89025778	0.057952	0.0016776	0.00098338	0.088011	3393		MT:5147:G:A	Affx-89025778	0.057952	0.001676	0.00098338	0.088321	3393		MT:5147:G:A	Affx-89025778	0.057952	0.036592	NA	3.0778	0.079369	3393
MT:5147:G:A	Affx-89025778	0.057952	0.0046371	0.0035943	0.197	4079_irnt		MT:5147:G:A	Affx-89025778	0.057952	0.0046524	0.0035943	0.19554	4079_irnt		MT:5147:G:A	Affx-89025778	0.057952	0.0046524	0.0035943	NA	0.19554	4079_irnt
MT:5147:G:A	Affx-89025778	0.057952	0.0048369	0.0034034	0.15526	4080_irnt		MT:5147:G:A	Affx-89025778	0.057952	0.0048674	0.0034037	0.15271	4080_irnt		MT:5147:G:A	Affx-89025778	0.057952	0.0048674	0.0034037	NA	0.15271	4080_irnt
MT:5147:G:A	Affx-89025778	0.057952	-0.00016567	0.00074015	0.82289	C3_SKIN		MT:5147:G:A	Affx-89025778	0.057952	-0.00016801	0.00074015	0.82043	C3_SKIN		MT:5147:G:A	Affx-89025778	0.057952	-0.0034661	NA	0.040556	0.8404	C3_SKIN
MT:5147:G:A	Affx-89025778	0.057952	0.00046407	0.00063104	0.4621	H26		MT:5147:G:A	Affx-89025778	0.057952	0.00046504	0.00063104	0.46116	H26		MT:5147:G:A	Affx-89025778	0.057952	0.016033	NA	0.64118	0.42328	H26
MT:5147:G:A	Affx-89025778	0.057952	-0.00026587	0.00047982	0.5795	I48		MT:5147:G:A	Affx-89025778	0.057952	-0.00026354	0.00047982	0.58284	I48		MT:5147:G:A	Affx-89025778	0.057952	-0.013773	NA	0.26701	0.60534	I48
MT:5147:G:A	Affx-89025778	0.057952	-0.00070598	0.0005835	0.22632	I9_CHD		MT:5147:G:A	Affx-89025778	0.057952	-0.00069682	0.00058358	0.23246	I9_CHD		MT:5147:G:A	Affx-89025778	0.057952	-0.0256	NA	1.345	0.24615	I9_CHD
MT:5147:G:A	Affx-89025778	0.057952	-0.00040264	0.00081386	0.62079	I9_IHD		MT:5147:G:A	Affx-89025778	0.057952	-0.00038951	0.000814	0.63229	I9_IHD		MT:5147:G:A	Affx-89025778	0.057952	-0.0067079	NA	0.18348	0.6684	I9_IHD
MT:5147:G:A	Affx-89025778	0.057952	-0.00076964	0.00062103	0.21524	K21		MT:5147:G:A	Affx-89025778	0.057952	-0.0007657	0.00062104	0.21761	K21		MT:5147:G:A	Affx-89025778	0.057952	-0.025322	NA	1.4859	0.22285	K21
MT:5147:G:A	Affx-89025778	0.057952	9.8169e-05	0.00053846	0.85534	K44		MT:5147:G:A	Affx-89025778	0.057952	0.00010126	0.00053846	0.85083	K44		MT:5147:G:A	Affx-89025778	0.057952	0.0052855	NA	0.050146	0.82281	K44
MT:5147:G:A	Affx-89025778	0.057952	0.00050186	0.00066747	0.45212	K57		MT:5147:G:A	Affx-89025778	0.057952	0.00050681	0.00066748	0.44769	K57		MT:5147:G:A	Affx-89025778	0.057952	0.015346	NA	0.657	0.41762	K57
MT:5178:C:A	Affx-89025691	0.00013891	-0.11426	0.067612	0.091043	30650_irnt		MT:5178:C:A	Affx-89025691	0.00013891	-0.11402	0.067612	0.091717	30650_irnt		MT:5178:C:A	Affx-89025691	0.00013891	-0.11402	0.067612	NA	0.091717	30650_irnt
MT:5178:C:A	Affx-89025691	0.00013891	0.02367	0.057381	0.67997	30700_irnt		MT:5178:C:A	Affx-89025691	0.00013891	0.024376	0.057382	0.67099	30700_irnt		MT:5178:C:A	Affx-89025691	0.00013891	0.024376	0.057382	NA	0.67099	30700_irnt
MT:5178:C:A	Affx-89025691	0.00013891	-0.049944	0.076977	0.51646	30740_irnt		MT:5178:C:A	Affx-89025691	0.00013891	-0.050592	0.076979	0.51104	30740_irnt		MT:5178:C:A	Affx-89025691	0.00013891	-0.050592	0.076979	NA	0.51104	30740_irnt
MT:5178:C:A	Affx-89025691	0.00013891	-0.055486	0.070484	0.43116	30760_irnt		MT:5178:C:A	Affx-89025691	0.00013891	-0.052934	0.070515	0.45284	30760_irnt		MT:5178:C:A	Affx-89025691	0.00013891	-0.052934	0.070515	NA	0.45284	30760_irnt
MT:5178:C:A	Affx-89025691	0.00013891	-0.087057	0.069673	0.21148	30780_irnt		MT:5178:C:A	Affx-89025691	0.00013891	-0.086781	0.069673	0.21293	30780_irnt		MT:5178:C:A	Affx-89025691	0.00013891	-0.086781	0.069673	NA	0.21293	30780_irnt
MT:5178:C:A	Affx-89025691	0.00013891	0.0044748	0.068648	0.94803	30870_irnt		MT:5178:C:A	Affx-89025691	0.00013891	0.0011531	0.068684	0.98661	30870_irnt		MT:5178:C:A	Affx-89025691	0.00013891	0.0011531	0.068684	NA	0.98661	30870_irnt
MT:5178:C:A	Affx-89025691	0.00013891	0.10284	0.088137	0.2433	3148_irnt		MT:5178:C:A	Affx-89025691	0.00013891	0.1039	0.08814	0.23848	3148_irnt		MT:5178:C:A	Affx-89025691	0.00013891	0.1039	0.08814	NA	0.23848	3148_irnt
MT:5178:C:A	Affx-89025691	0.00013891	0.059955	0.069953	0.39141	4079_irnt		MT:5178:C:A	Affx-89025691	0.00013891	0.059464	0.069954	0.39531	4079_irnt		MT:5178:C:A	Affx-89025691	0.00013891	0.059464	0.069954	NA	0.39531	4079_irnt
MT:5178:C:A	Affx-89025691	0.00013891	0.036089	0.066238	0.58587	4080_irnt		MT:5178:C:A	Affx-89025691	0.00013891	0.034872	0.066243	0.5986	4080_irnt		MT:5178:C:A	Affx-89025691	0.00013891	0.034872	0.066243	NA	0.5986	4080_irnt
MT:5263:C:T	Affx-34462105	0.0024683	-0.015894	0.00757	0.035765	20002_1065		MT:5263:C:T	Affx-34462105	0.0024683	-0.015899	0.0075708	0.035723	20002_1065		MT:5263:C:T	Affx-34462105	0.0024683	-0.09062	NA	4.4044	0.035847	20002_1065
MT:5263:C:T	Affx-34462105	0.0024683	1.8618e-05	0.0030668	0.99516	20002_1074		MT:5263:C:T	Affx-34462105	0.0024683	1.5344e-05	0.0030672	0.99601	20002_1074		MT:5263:C:T	Affx-34462105	0.0024683	0.010666	NA	0.010646	0.91782	20002_1074
MT:5263:C:T	Affx-34462105	0.0024683	0.00043159	0.0048416	0.92897	20002_1465		MT:5263:C:T	Affx-34462105	0.0024683	0.00042967	0.0048419	0.92929	20002_1465		MT:5263:C:T	Affx-34462105	0.0024683	0.0096696	NA	0.021567	0.88325	20002_1465
MT:5263:C:T	Affx-34462105	0.0024683	0.0013584	0.0056729	0.81075	20002_1473		MT:5263:C:T	Affx-34462105	0.0024683	0.0013549	0.0056737	0.81126	20002_1473		MT:5263:C:T	Affx-34462105	0.0024683	0.015219	NA	0.074516	0.78487	20002_1473
MT:5263:C:T	Affx-34462105	0.0024683	-0.0049055	0.0037758	0.19388	2443		MT:5263:C:T	Affx-34462105	0.0024683	-0.0049109	0.0037769	0.19353	2443		MT:5263:C:T	Affx-34462105	0.0024683	-0.11259	NA	1.5861	0.20788	2443
MT:5263:C:T	Affx-34462105	0.0024683	0.0033722	0.017199	0.84456	30650_irnt		MT:5263:C:T	Affx-34462105	0.0024683	0.0033714	0.017199	0.84459	30650_irnt		MT:5263:C:T	Affx-34462105	0.0024683	0.0033714	0.017199	NA	0.84459	30650_irnt
MT:5263:C:T	Affx-34462105	0.0024683	-0.024198	0.014606	0.097569	30700_irnt		MT:5263:C:T	Affx-34462105	0.0024683	-0.024196	0.014606	0.09762	30700_irnt		MT:5263:C:T	Affx-34462105	0.0024683	-0.024196	0.014606	NA	0.09762	30700_irnt
MT:5263:C:T	Affx-34462105	0.0024683	-0.036264	0.018678	0.052191	30740_irnt		MT:5263:C:T	Affx-34462105	0.0024683	-0.036266	0.018678	0.052183	30740_irnt		MT:5263:C:T	Affx-34462105	0.0024683	-0.036266	0.018678	NA	0.052183	30740_irnt
MT:5263:C:T	Affx-34462105	0.0024683	0.0040178	0.01709	0.81414	30760_irnt		MT:5263:C:T	Affx-34462105	0.0024683	0.0040243	0.017098	0.81392	30760_irnt		MT:5263:C:T	Affx-34462105	0.0024683	0.0040243	0.017098	NA	0.81392	30760_irnt
MT:5263:C:T	Affx-34462105	0.0024683	0.0069689	0.017735	0.69436	30780_irnt		MT:5263:C:T	Affx-34462105	0.0024683	0.0069721	0.017735	0.69423	30780_irnt		MT:5263:C:T	Affx-34462105	0.0024683	0.0069721	0.017735	NA	0.69423	30780_irnt
MT:5263:C:T	Affx-34462105	0.0024683	-0.0022039	0.017463	0.89957	30870_irnt		MT:5263:C:T	Affx-34462105	0.0024683	-0.0022179	0.017472	0.89898	30870_irnt		MT:5263:C:T	Affx-34462105	0.0024683	-0.0022179	0.017472	NA	0.89898	30870_irnt
MT:5263:C:T	Affx-34462105	0.0024683	0.0047947	0.022388	0.83042	3148_irnt		MT:5263:C:T	Affx-34462105	0.0024683	0.004807	0.022389	0.83	3148_irnt		MT:5263:C:T	Affx-34462105	0.0024683	0.004807	0.022389	NA	0.83	3148_irnt
MT:5263:C:T	Affx-34462105	0.0024683	0.0027187	0.0050116	0.58749	3393		MT:5263:C:T	Affx-34462105	0.0024683	0.0027186	0.0050116	0.5875	3393		MT:5263:C:T	Affx-34462105	0.0024683	0.063809	NA	0.36539	0.54553	3393
MT:5263:C:T	Affx-34462105	0.0024683	-0.019188	0.017889	0.28346	4079_irnt		MT:5263:C:T	Affx-34462105	0.0024683	-0.019185	0.017889	0.28353	4079_irnt		MT:5263:C:T	Affx-34462105	0.0024683	-0.019185	0.017889	NA	0.28353	4079_irnt
MT:5263:C:T	Affx-34462105	0.0024683	-0.016554	0.016939	0.32844	4080_irnt		MT:5263:C:T	Affx-34462105	0.0024683	-0.016557	0.01694	0.32839	4080_irnt		MT:5263:C:T	Affx-34462105	0.0024683	-0.016557	0.01694	NA	0.32839	4080_irnt
MT:5263:C:T	Affx-34462105	0.0024683	0.0062908	0.0036928	0.088468	C3_SKIN		MT:5263:C:T	Affx-34462105	0.0024683	0.0062914	0.0036928	0.088439	C3_SKIN		MT:5263:C:T	Affx-34462105	0.0024683	0.13556	NA	2.9055	0.088275	C3_SKIN
MT:5263:C:T	Affx-34462105	0.0024683	0.0046922	0.0031484	0.13614	H26		MT:5263:C:T	Affx-34462105	0.0024683	0.004692	0.0031484	0.13615	H26		MT:5263:C:T	Affx-34462105	0.0024683	0.1399	NA	2.2462	0.13395	H26
MT:5263:C:T	Affx-34462105	0.0024683	0.00037669	0.0029113	0.89705	I9_CHD		MT:5263:C:T	Affx-34462105	0.0024683	0.00037482	0.0029116	0.89757	I9_CHD		MT:5263:C:T	Affx-34462105	0.0024683	0.025476	NA	0.056144	0.8127	I9_CHD
MT:5263:C:T	Affx-34462105	0.0024683	-0.00092141	0.0040605	0.82049	I9_IHD		MT:5263:C:T	Affx-34462105	0.0024683	-0.00092609	0.0040613	0.81962	I9_IHD		MT:5263:C:T	Affx-34462105	0.0024683	-0.01179	NA	0.022445	0.88091	I9_IHD
MT:5263:C:T	Affx-34462105	0.0024683	0.006115	0.0030985	0.048433	K21		MT:5263:C:T	Affx-34462105	0.0024683	0.0061143	0.0030985	0.048463	K21		MT:5263:C:T	Affx-34462105	0.0024683	0.18004	NA	3.8546	0.049609	K21
MT:5263:C:T	Affx-34462105	0.0024683	-0.0011937	0.0033302	0.72	K57		MT:5263:C:T	Affx-34462105	0.0024683	-0.0011947	0.0033302	0.71979	K57		MT:5263:C:T	Affx-34462105	0.0024683	-0.027378	NA	0.078166	0.7798	K57
MT:5360:C:T	Affx-92047850	0.00055189	-0.022657	0.015988	0.15645	20002_1065		MT:5360:C:T	Affx-92047850	0.00055189	-0.022669	0.01599	0.15627	20002_1065		MT:5360:C:T	Affx-92047850	0.00055189	-0.131	NA	2.0181	0.15543	20002_1065
MT:5360:C:T	Affx-92047850	0.00055189	0.012388	0.011981	0.30116	20002_1473		MT:5360:C:T	Affx-92047850	0.00055189	0.012378	0.011983	0.30163	20002_1473		MT:5360:C:T	Affx-92047850	0.00055189	0.11877	NA	1.1443	0.28475	20002_1473
MT:5360:C:T	Affx-92047850	0.00055189	-0.0088852	0.036742	0.80891	30650_irnt		MT:5360:C:T	Affx-92047850	0.00055189	-0.0088821	0.036741	0.80898	30650_irnt		MT:5360:C:T	Affx-92047850	0.00055189	-0.0088821	0.036741	NA	0.80898	30650_irnt
MT:5360:C:T	Affx-92047850	0.00055189	-0.020343	0.031182	0.51414	30700_irnt		MT:5360:C:T	Affx-92047850	0.00055189	-0.02033	0.031183	0.51442	30700_irnt		MT:5360:C:T	Affx-92047850	0.00055189	-0.02033	0.031183	NA	0.51442	30700_irnt
MT:5360:C:T	Affx-92047850	0.00055189	-0.023192	0.039856	0.56063	30740_irnt		MT:5360:C:T	Affx-92047850	0.00055189	-0.023199	0.039857	0.56053	30740_irnt		MT:5360:C:T	Affx-92047850	0.00055189	-0.023199	0.039857	NA	0.56053	30740_irnt
MT:5360:C:T	Affx-92047850	0.00055189	-0.02314	0.036494	0.52603	30760_irnt		MT:5360:C:T	Affx-92047850	0.00055189	-0.023108	0.03651	0.52678	30760_irnt		MT:5360:C:T	Affx-92047850	0.00055189	-0.023108	0.03651	NA	0.52678	30760_irnt
MT:5360:C:T	Affx-92047850	0.00055189	-0.051849	0.037861	0.17086	30780_irnt		MT:5360:C:T	Affx-92047850	0.00055189	-0.051842	0.037861	0.17092	30780_irnt		MT:5360:C:T	Affx-92047850	0.00055189	-0.051842	0.037861	NA	0.17092	30780_irnt
MT:5360:C:T	Affx-92047850	0.00055189	-0.020944	0.037304	0.57449	30870_irnt		MT:5360:C:T	Affx-92047850	0.00055189	-0.021011	0.037324	0.57348	30870_irnt		MT:5360:C:T	Affx-92047850	0.00055189	-0.021011	0.037324	NA	0.57348	30870_irnt
MT:5360:C:T	Affx-92047850	0.00055189	0.01816	0.046678	0.69724	3148_irnt		MT:5360:C:T	Affx-92047850	0.00055189	0.018179	0.04668	0.69695	3148_irnt		MT:5360:C:T	Affx-92047850	0.00055189	0.018179	0.04668	NA	0.69695	3148_irnt
MT:5360:C:T	Affx-92047850	0.00055189	-0.077786	0.038014	0.040733	4079_irnt		MT:5360:C:T	Affx-92047850	0.00055189	-0.077793	0.038015	0.040718	4079_irnt		MT:5360:C:T	Affx-92047850	0.00055189	-0.077793	0.038015	NA	0.040718	4079_irnt
MT:5360:C:T	Affx-92047850	0.00055189	-0.048015	0.035995	0.18223	4080_irnt		MT:5360:C:T	Affx-92047850	0.00055189	-0.04804	0.035998	0.18203	4080_irnt		MT:5360:C:T	Affx-92047850	0.00055189	-0.04804	0.035998	NA	0.18203	4080_irnt
MT:5390:A:G	Affx-79381673	0.01163	0.0039446	0.003501	0.25986	20002_1065		MT:5390:A:G	Affx-79381673	0.01163	0.0039398	0.0035014	0.2605	20002_1065		MT:5390:A:G	Affx-79381673	0.01163	0.021562	NA	1.2595	0.26174	20002_1065
MT:5390:A:G	Affx-79381673	0.01163	-0.00043922	0.0014183	0.75681	20002_1074		MT:5390:A:G	Affx-79381673	0.01163	-0.00044226	0.0014185	0.75521	20002_1074		MT:5390:A:G	Affx-79381673	0.01163	-0.01282	NA	0.071932	0.78854	20002_1074
MT:5390:A:G	Affx-79381673	0.01163	0.00098757	0.0022391	0.65918	20002_1465		MT:5390:A:G	Affx-79381673	0.01163	0.00098591	0.0022393	0.65973	20002_1465		MT:5390:A:G	Affx-79381673	0.01163	0.013277	NA	0.19784	0.65647	20002_1465
MT:5390:A:G	Affx-79381673	0.01163	0.00099696	0.0026236	0.70395	20002_1473		MT:5390:A:G	Affx-79381673	0.01163	0.0009939	0.002624	0.70486	20002_1473		MT:5390:A:G	Affx-79381673	0.01163	0.010064	NA	0.15393	0.69481	20002_1473
MT:5390:A:G	Affx-79381673	0.01163	0.0007646	0.0017477	0.66175	2443		MT:5390:A:G	Affx-79381673	0.01163	0.00076007	0.0017482	0.66373	2443		MT:5390:A:G	Affx-79381673	0.01163	0.017717	NA	0.21268	0.64467	2443
MT:5390:A:G	Affx-79381673	0.01163	0.010217	0.0080065	0.20191	30650_irnt		MT:5390:A:G	Affx-79381673	0.01163	0.010217	0.0080065	0.20191	30650_irnt		MT:5390:A:G	Affx-79381673	0.01163	0.010217	0.0080065	NA	0.20191	30650_irnt
MT:5390:A:G	Affx-79381673	0.01163	-0.01377	0.0067787	0.042213	30700_irnt		MT:5390:A:G	Affx-79381673	0.01163	-0.013765	0.0067789	0.042296	30700_irnt		MT:5390:A:G	Affx-79381673	0.01163	-0.013765	0.0067789	NA	0.042296	30700_irnt
MT:5390:A:G	Affx-79381673	0.01163	0.012162	0.0087017	0.1622	30740_irnt		MT:5390:A:G	Affx-79381673	0.01163	0.012157	0.0087018	0.16239	30740_irnt		MT:5390:A:G	Affx-79381673	0.01163	0.012157	0.0087018	NA	0.16239	30740_irnt
MT:5390:A:G	Affx-79381673	0.01163	0.015813	0.0079652	0.04712	30760_irnt		MT:5390:A:G	Affx-79381673	0.01163	0.01583	0.0079686	0.04697	30760_irnt		MT:5390:A:G	Affx-79381673	0.01163	0.01583	0.0079686	NA	0.04697	30760_irnt
MT:5390:A:G	Affx-79381673	0.01163	-0.003904	0.0082401	0.63566	30780_irnt		MT:5390:A:G	Affx-79381673	0.01163	-0.0039002	0.0082401	0.63599	30780_irnt		MT:5390:A:G	Affx-79381673	0.01163	-0.0039002	0.0082401	NA	0.63599	30780_irnt
MT:5390:A:G	Affx-79381673	0.01163	-0.0061558	0.0081109	0.44788	30870_irnt		MT:5390:A:G	Affx-79381673	0.01163	-0.0061785	0.0081152	0.44645	30870_irnt		MT:5390:A:G	Affx-79381673	0.01163	-0.0061785	0.0081152	NA	0.44645	30870_irnt
MT:5390:A:G	Affx-79381673	0.01163	-0.011653	0.010577	0.2706	3148_irnt		MT:5390:A:G	Affx-79381673	0.01163	-0.011648	0.010577	0.27078	3148_irnt		MT:5390:A:G	Affx-79381673	0.01163	-0.011648	0.010577	NA	0.27078	3148_irnt
MT:5390:A:G	Affx-79381673	0.01163	-0.00053827	0.0022604	0.81178	3393		MT:5390:A:G	Affx-79381673	0.01163	-0.00053758	0.0022604	0.81201	3393		MT:5390:A:G	Affx-79381673	0.01163	-0.0078054	NA	0.0258	0.87239	3393
MT:5390:A:G	Affx-79381673	0.01163	0.0005659	0.0083123	0.94572	4079_irnt		MT:5390:A:G	Affx-79381673	0.01163	0.00056815	0.0083124	0.94551	4079_irnt		MT:5390:A:G	Affx-79381673	0.01163	0.00056815	0.0083124	NA	0.94551	4079_irnt
MT:5390:A:G	Affx-79381673	0.01163	-0.0020273	0.0078708	0.79674	4080_irnt		MT:5390:A:G	Affx-79381673	0.01163	-0.0020308	0.0078714	0.79641	4080_irnt		MT:5390:A:G	Affx-79381673	0.01163	-0.0020308	0.0078714	NA	0.79641	4080_irnt
MT:5390:A:G	Affx-79381673	0.01163	0.00024961	0.0017087	0.88386	C3_SKIN		MT:5390:A:G	Affx-79381673	0.01163	0.00025007	0.0017087	0.88364	C3_SKIN		MT:5390:A:G	Affx-79381673	0.01163	0.0068645	NA	0.030608	0.86112	C3_SKIN
MT:5390:A:G	Affx-79381673	0.01163	-0.00087693	0.0014568	0.54721	H26		MT:5390:A:G	Affx-79381673	0.01163	-0.00087706	0.0014568	0.54715	H26		MT:5390:A:G	Affx-79381673	0.01163	-0.026369	NA	0.31872	0.57238	H26
MT:5390:A:G	Affx-79381673	0.01163	-0.0012448	0.0011077	0.26112	I48		MT:5390:A:G	Affx-79381673	0.01163	-0.0012451	0.0011077	0.26099	I48		MT:5390:A:G	Affx-79381673	0.01163	-0.069381	NA	1.1881	0.27571	I48
MT:5390:A:G	Affx-79381673	0.01163	-0.0011527	0.0013471	0.39217	I9_CHD		MT:5390:A:G	Affx-79381673	0.01163	-0.0011541	0.0013472	0.39163	I9_CHD		MT:5390:A:G	Affx-79381673	0.01163	-0.042194	NA	0.67498	0.41132	I9_CHD
MT:5390:A:G	Affx-79381673	0.01163	-0.0022809	0.0018788	0.22475	I9_IHD		MT:5390:A:G	Affx-79381673	0.01163	-0.0022849	0.0018792	0.22402	I9_IHD		MT:5390:A:G	Affx-79381673	0.01163	-0.044262	NA	1.4484	0.22878	I9_IHD
MT:5390:A:G	Affx-79381673	0.01163	0.000275	0.0014337	0.84789	K21		MT:5390:A:G	Affx-79381673	0.01163	0.00027444	0.0014337	0.8482	K21		MT:5390:A:G	Affx-79381673	0.01163	0.01069	NA	0.052359	0.81901	K21
MT:5390:A:G	Affx-79381673	0.01163	0.0023499	0.0012431	0.058704	K44		MT:5390:A:G	Affx-79381673	0.01163	0.0023494	0.0012431	0.058757	K44		MT:5390:A:G	Affx-79381673	0.01163	0.093895	NA	3.4151	0.064602	K44
MT:5390:A:G	Affx-79381673	0.01163	-0.002768	0.0015409	0.072439	K57		MT:5390:A:G	Affx-79381673	0.01163	-0.0027688	0.0015409	0.072367	K57		MT:5390:A:G	Affx-79381673	0.01163	-0.081657	NA	3.2191	0.072785	K57
MT:5495:T:C	Affx-79381676	0.016015	-0.0052791	0.0029914	0.077608	20002_1065		MT:5495:T:C	Affx-79381676	0.016015	-0.0052781	0.0029918	0.077699	20002_1065		MT:5495:T:C	Affx-79381676	0.016015	-0.029449	NA	3.1253	0.077084	20002_1065
MT:5495:T:C	Affx-79381676	0.016015	-0.00075063	0.0012119	0.53566	20002_1074		MT:5495:T:C	Affx-79381676	0.016015	-0.00075135	0.0012121	0.53533	20002_1074		MT:5495:T:C	Affx-79381676	0.016015	-0.023017	NA	0.31098	0.57708	20002_1074
MT:5495:T:C	Affx-79381676	0.016015	0.0019133	0.0019132	0.3173	20002_1465		MT:5495:T:C	Affx-79381676	0.016015	0.0019144	0.0019133	0.31705	20002_1465		MT:5495:T:C	Affx-79381676	0.016015	0.025761	NA	1.0291	0.31036	20002_1465
MT:5495:T:C	Affx-79381676	0.016015	-0.0014319	0.0022417	0.52298	20002_1473		MT:5495:T:C	Affx-79381676	0.016015	-0.0014299	0.0022421	0.52363	20002_1473		MT:5495:T:C	Affx-79381676	0.016015	-0.013885	NA	0.39275	0.53086	20002_1473
MT:5495:T:C	Affx-79381676	0.016015	-0.0025635	0.0014944	0.086276	2443		MT:5495:T:C	Affx-79381676	0.016015	-0.0025633	0.0014949	0.086388	2443		MT:5495:T:C	Affx-79381676	0.016015	-0.058861	NA	2.9399	0.086418	2443
MT:5495:T:C	Affx-79381676	0.016015	0.0020856	0.0068397	0.76042	30650_irnt		MT:5495:T:C	Affx-79381676	0.016015	0.0020835	0.0068397	0.76065	30650_irnt		MT:5495:T:C	Affx-79381676	0.016015	0.0020835	0.0068397	NA	0.76065	30650_irnt
MT:5495:T:C	Affx-79381676	0.016015	-0.0099882	0.0057981	0.084946	30700_irnt		MT:5495:T:C	Affx-79381676	0.016015	-0.0099899	0.0057982	0.084905	30700_irnt		MT:5495:T:C	Affx-79381676	0.016015	-0.0099899	0.0057982	NA	0.084905	30700_irnt
MT:5495:T:C	Affx-79381676	0.016015	-0.0058675	0.0074231	0.42927	30740_irnt		MT:5495:T:C	Affx-79381676	0.016015	-0.0058649	0.0074233	0.42948	30740_irnt		MT:5495:T:C	Affx-79381676	0.016015	-0.0058649	0.0074233	NA	0.42948	30740_irnt
MT:5495:T:C	Affx-79381676	0.016015	0.007427	0.0067946	0.27436	30760_irnt		MT:5495:T:C	Affx-79381676	0.016015	0.0074159	0.0067976	0.27529	30760_irnt		MT:5495:T:C	Affx-79381676	0.016015	0.0074159	0.0067976	NA	0.27529	30760_irnt
MT:5495:T:C	Affx-79381676	0.016015	0.012486	0.0070445	0.076308	30780_irnt		MT:5495:T:C	Affx-79381676	0.016015	0.012488	0.0070445	0.076282	30780_irnt		MT:5495:T:C	Affx-79381676	0.016015	0.012488	0.0070445	NA	0.076282	30780_irnt
MT:5495:T:C	Affx-79381676	0.016015	-0.0013427	0.0069366	0.84652	30870_irnt		MT:5495:T:C	Affx-79381676	0.016015	-0.0013348	0.0069402	0.84749	30870_irnt		MT:5495:T:C	Affx-79381676	0.016015	-0.0013348	0.0069402	NA	0.84749	30870_irnt
MT:5495:T:C	Affx-79381676	0.016015	-0.010049	0.0089458	0.26132	3148_irnt		MT:5495:T:C	Affx-79381676	0.016015	-0.010047	0.0089461	0.2614	3148_irnt		MT:5495:T:C	Affx-79381676	0.016015	-0.010047	0.0089461	NA	0.2614	3148_irnt
MT:5495:T:C	Affx-79381676	0.016015	-0.0011305	0.0019273	0.55748	3393		MT:5495:T:C	Affx-79381676	0.016015	-0.0011305	0.0019273	0.55748	3393		MT:5495:T:C	Affx-79381676	0.016015	-0.023114	NA	0.30276	0.58216	3393
MT:5495:T:C	Affx-79381676	0.016015	-0.010835	0.0070877	0.12634	4079_irnt		MT:5495:T:C	Affx-79381676	0.016015	-0.010829	0.0070878	0.12657	4079_irnt		MT:5495:T:C	Affx-79381676	0.016015	-0.010829	0.0070878	NA	0.12657	4079_irnt
MT:5495:T:C	Affx-79381676	0.016015	-0.0048343	0.0067113	0.47133	4080_irnt		MT:5495:T:C	Affx-79381676	0.016015	-0.0048274	0.0067118	0.472	4080_irnt		MT:5495:T:C	Affx-79381676	0.016015	-0.0048274	0.0067118	NA	0.472	4080_irnt
MT:5495:T:C	Affx-79381676	0.016015	0.00063145	0.0014601	0.66539	C3_SKIN		MT:5495:T:C	Affx-79381676	0.016015	0.00063128	0.0014601	0.66548	C3_SKIN		MT:5495:T:C	Affx-79381676	0.016015	0.015703	NA	0.22055	0.63862	C3_SKIN
MT:5495:T:C	Affx-79381676	0.016015	4.4065e-05	0.0012448	0.97176	H26		MT:5495:T:C	Affx-79381676	0.016015	4.4179e-05	0.0012448	0.97169	H26		MT:5495:T:C	Affx-79381676	0.016015	0.0038554	NA	0.0095746	0.92205	H26
MT:5495:T:C	Affx-79381676	0.016015	-0.0018101	0.0009465	0.055823	I48		MT:5495:T:C	Affx-79381676	0.016015	-0.0018099	0.00094651	0.055858	I48		MT:5495:T:C	Affx-79381676	0.016015	-0.10646	NA	3.6665	0.055516	I48
MT:5495:T:C	Affx-79381676	0.016015	0.00039429	0.001151	0.73194	I9_CHD		MT:5495:T:C	Affx-79381676	0.016015	0.0003952	0.0011512	0.73137	I9_CHD		MT:5495:T:C	Affx-79381676	0.016015	0.016443	NA	0.14924	0.69926	I9_CHD
MT:5495:T:C	Affx-79381676	0.016015	0.00048847	0.0016054	0.76093	I9_IHD		MT:5495:T:C	Affx-79381676	0.016015	0.00048838	0.0016057	0.76102	I9_IHD		MT:5495:T:C	Affx-79381676	0.016015	0.010245	NA	0.11196	0.73792	I9_IHD
MT:5495:T:C	Affx-79381676	0.016015	0.0017288	0.0012251	0.15819	K21		MT:5495:T:C	Affx-79381676	0.016015	0.0017293	0.0012251	0.15809	K21		MT:5495:T:C	Affx-79381676	0.016015	0.055681	NA	2.0367	0.15354	K21
MT:5495:T:C	Affx-79381676	0.016015	-0.00022668	0.0010622	0.83101	K44		MT:5495:T:C	Affx-79381676	0.016015	-0.00022635	0.0010622	0.83125	K44		MT:5495:T:C	Affx-79381676	0.016015	-0.0069865	NA	0.022337	0.88119	K44
MT:5495:T:C	Affx-79381676	0.016015	0.00030384	0.0013167	0.8175	K57		MT:5495:T:C	Affx-79381676	0.016015	0.00030435	0.0013167	0.8172	K57		MT:5495:T:C	Affx-79381676	0.016015	0.010334	NA	0.07708	0.78129	K57
MT:5633:C:T	Affx-89025677	0.0078443	-0.0020691	0.0040153	0.60635	20002_1065		MT:5633:C:T	Affx-89025677	0.0078443	-0.0020245	0.0040157	0.61416	20002_1065		MT:5633:C:T	Affx-89025677	0.0078443	-0.011055	NA	0.2461	0.61984	20002_1065
MT:5633:C:T	Affx-89025677	0.0078443	0.0030303	0.0016267	0.06248	20002_1074		MT:5633:C:T	Affx-89025677	0.0078443	0.0030459	0.0016269	0.061178	20002_1074		MT:5633:C:T	Affx-89025677	0.0078443	0.095381	NA	3.415	0.064605	20002_1074
MT:5633:C:T	Affx-89025677	0.0078443	-0.00032442	0.0025681	0.89947	20002_1465		MT:5633:C:T	Affx-89025677	0.0078443	-0.00030227	0.0025682	0.90631	20002_1465		MT:5633:C:T	Affx-89025677	0.0078443	-0.0034872	NA	0.010071	0.92006	20002_1465
MT:5633:C:T	Affx-89025677	0.0078443	-0.0048348	0.003009	0.1081	20002_1473		MT:5633:C:T	Affx-89025677	0.0078443	-0.004794	0.0030094	0.11116	20002_1473		MT:5633:C:T	Affx-89025677	0.0078443	-0.047813	NA	2.4862	0.11485	20002_1473
MT:5633:C:T	Affx-89025677	0.0078443	-0.00019212	0.0020045	0.92365	2443		MT:5633:C:T	Affx-89025677	0.0078443	-0.00015633	0.0020051	0.93786	2443		MT:5633:C:T	Affx-89025677	0.0078443	-0.0014323	NA	0.0010284	0.97442	2443
MT:5633:C:T	Affx-89025677	0.0078443	0.0074011	0.0091424	0.4182	30650_irnt		MT:5633:C:T	Affx-89025677	0.0078443	0.0073871	0.0091424	0.41909	30650_irnt		MT:5633:C:T	Affx-89025677	0.0078443	0.0073871	0.0091424	NA	0.41909	30650_irnt
MT:5633:C:T	Affx-89025677	0.0078443	-0.0042814	0.0077446	0.58038	30700_irnt		MT:5633:C:T	Affx-89025677	0.0078443	-0.0043213	0.0077448	0.57687	30700_irnt		MT:5633:C:T	Affx-89025677	0.0078443	-0.0043213	0.0077448	NA	0.57687	30700_irnt
MT:5633:C:T	Affx-89025677	0.0078443	-0.0084641	0.0099665	0.39574	30740_irnt		MT:5633:C:T	Affx-89025677	0.0078443	-0.0084352	0.0099667	0.39737	30740_irnt		MT:5633:C:T	Affx-89025677	0.0078443	-0.0084352	0.0099667	NA	0.39737	30740_irnt
MT:5633:C:T	Affx-89025677	0.0078443	0.0013649	0.009124	0.88108	30760_irnt		MT:5633:C:T	Affx-89025677	0.0078443	0.001253	0.0091279	0.89082	30760_irnt		MT:5633:C:T	Affx-89025677	0.0078443	0.001253	0.0091279	NA	0.89082	30760_irnt
MT:5633:C:T	Affx-89025677	0.0078443	-0.00079148	0.0094037	0.93292	30780_irnt		MT:5633:C:T	Affx-89025677	0.0078443	-0.00080369	0.0094037	0.93189	30780_irnt		MT:5633:C:T	Affx-89025677	0.0078443	-0.00080369	0.0094037	NA	0.93189	30780_irnt
MT:5633:C:T	Affx-89025677	0.0078443	-0.012777	0.0092653	0.16789	30870_irnt		MT:5633:C:T	Affx-89025677	0.0078443	-0.01259	0.0092702	0.17444	30870_irnt		MT:5633:C:T	Affx-89025677	0.0078443	-0.01259	0.0092702	NA	0.17444	30870_irnt
MT:5633:C:T	Affx-89025677	0.0078443	-0.0072963	0.012323	0.55379	3148_irnt		MT:5633:C:T	Affx-89025677	0.0078443	-0.0073445	0.012323	0.55119	3148_irnt		MT:5633:C:T	Affx-89025677	0.0078443	-0.0073445	0.012323	NA	0.55119	3148_irnt
MT:5633:C:T	Affx-89025677	0.0078443	-0.0060288	0.0026009	0.020449	3393		MT:5633:C:T	Affx-89025677	0.0078443	-0.0060298	0.0026008	0.020428	3393		MT:5633:C:T	Affx-89025677	0.0078443	-0.1459	NA	5.7052	0.016915	3393
MT:5633:C:T	Affx-89025677	0.0078443	-0.0038914	0.0095777	0.68453	4079_irnt		MT:5633:C:T	Affx-89025677	0.0078443	-0.0038499	0.0095778	0.68771	4079_irnt		MT:5633:C:T	Affx-89025677	0.0078443	-0.0038499	0.0095778	NA	0.68771	4079_irnt
MT:5633:C:T	Affx-89025677	0.0078443	-0.0026317	0.009069	0.77168	4080_irnt		MT:5633:C:T	Affx-89025677	0.0078443	-0.0025377	0.0090697	0.77963	4080_irnt		MT:5633:C:T	Affx-89025677	0.0078443	-0.0025377	0.0090697	NA	0.77963	4080_irnt
MT:5633:C:T	Affx-89025677	0.0078443	0.0035229	0.00196	0.072266	C3_SKIN		MT:5633:C:T	Affx-89025677	0.0078443	0.0035179	0.00196	0.07267	C3_SKIN		MT:5633:C:T	Affx-89025677	0.0078443	0.076859	NA	3.1424	0.076284	C3_SKIN
MT:5633:C:T	Affx-89025677	0.0078443	0.0016768	0.001671	0.31565	H26		MT:5633:C:T	Affx-89025677	0.0078443	0.0016788	0.001671	0.31506	H26		MT:5633:C:T	Affx-89025677	0.0078443	0.051608	NA	1.0119	0.31445	H26
MT:5633:C:T	Affx-89025677	0.0078443	0.0016523	0.0012706	0.19345	I48		MT:5633:C:T	Affx-89025677	0.0078443	0.0016572	0.0012706	0.19215	I48		MT:5633:C:T	Affx-89025677	0.0078443	0.0883	NA	1.7651	0.18399	I48
MT:5633:C:T	Affx-89025677	0.0078443	0.0033754	0.0015451	0.028923	I9_CHD		MT:5633:C:T	Affx-89025677	0.0078443	0.0033946	0.0015453	0.028042	I9_CHD		MT:5633:C:T	Affx-89025677	0.0078443	0.1171	NA	4.7484	0.029326	I9_CHD
MT:5633:C:T	Affx-89025677	0.0078443	0.0016285	0.0021551	0.44987	I9_IHD		MT:5633:C:T	Affx-89025677	0.0078443	0.0016572	0.0021555	0.44199	I9_IHD		MT:5633:C:T	Affx-89025677	0.0078443	0.032721	NA	0.64873	0.42057	I9_IHD
MT:5633:C:T	Affx-89025677	0.0078443	-0.0004916	0.0016445	0.76499	K21		MT:5633:C:T	Affx-89025677	0.0078443	-0.0004834	0.0016446	0.76881	K21		MT:5633:C:T	Affx-89025677	0.0078443	-0.013854	NA	0.064267	0.79987	K21
MT:5633:C:T	Affx-89025677	0.0078443	-0.0012448	0.0014259	0.38267	K44		MT:5633:C:T	Affx-89025677	0.0078443	-0.0012383	0.0014259	0.38515	K44		MT:5633:C:T	Affx-89025677	0.0078443	-0.053337	NA	0.68826	0.40676	K44
MT:5633:C:T	Affx-89025677	0.0078443	-0.0018394	0.0017675	0.29802	K57		MT:5633:C:T	Affx-89025677	0.0078443	-0.001829	0.0017675	0.30076	K57		MT:5633:C:T	Affx-89025677	0.0078443	-0.053097	NA	1.0545	0.30447	K57
MT:5656:A:G	Affx-34462122	0.012804	-0.0019267	0.0031516	0.54098	20002_1065		MT:5656:A:G	Affx-34462122	0.012804	-0.00187	0.0031519	0.55298	20002_1065		MT:5656:A:G	Affx-34462122	0.012804	-0.010559	NA	0.3652	0.54563	20002_1065
MT:5656:A:G	Affx-34462122	0.012804	-0.0024119	0.0012768	0.058882	20002_1074		MT:5656:A:G	Affx-34462122	0.012804	-0.0023912	0.0012769	0.061122	20002_1074		MT:5656:A:G	Affx-34462122	0.012804	-0.086444	NA	3.6485	0.056121	20002_1074
MT:5656:A:G	Affx-34462122	0.012804	-5.5005e-05	0.0020157	0.97823	20002_1465		MT:5656:A:G	Affx-34462122	0.012804	-2.7327e-05	0.0020158	0.98918	20002_1465		MT:5656:A:G	Affx-34462122	0.012804	-0.00056523	NA	0.00042906	0.98347	20002_1465
MT:5656:A:G	Affx-34462122	0.012804	0.0024327	0.0023618	0.303	20002_1473		MT:5656:A:G	Affx-34462122	0.012804	0.0024837	0.0023621	0.29305	20002_1473		MT:5656:A:G	Affx-34462122	0.012804	0.023935	NA	1.0832	0.29798	20002_1473
MT:5656:A:G	Affx-34462122	0.012804	0.0025481	0.0015735	0.10536	2443		MT:5656:A:G	Affx-34462122	0.012804	0.0025941	0.001574	0.099331	2443		MT:5656:A:G	Affx-34462122	0.012804	0.055461	NA	2.6863	0.10121	2443
MT:5656:A:G	Affx-34462122	0.012804	-0.0053898	0.0072145	0.45501	30650_irnt		MT:5656:A:G	Affx-34462122	0.012804	-0.005411	0.0072144	0.45324	30650_irnt		MT:5656:A:G	Affx-34462122	0.012804	-0.005411	0.0072144	NA	0.45324	30650_irnt
MT:5656:A:G	Affx-34462122	0.012804	0.0017008	0.0061095	0.78072	30700_irnt		MT:5656:A:G	Affx-34462122	0.012804	0.0016396	0.0061097	0.78843	30700_irnt		MT:5656:A:G	Affx-34462122	0.012804	0.0016396	0.0061097	NA	0.78843	30700_irnt
MT:5656:A:G	Affx-34462122	0.012804	0.0044277	0.007854	0.57293	30740_irnt		MT:5656:A:G	Affx-34462122	0.012804	0.0045129	0.0078541	0.56557	30740_irnt		MT:5656:A:G	Affx-34462122	0.012804	0.0045129	0.0078541	NA	0.56557	30740_irnt
MT:5656:A:G	Affx-34462122	0.012804	-0.0034178	0.0071879	0.63443	30760_irnt		MT:5656:A:G	Affx-34462122	0.012804	-0.0037487	0.007191	0.60216	30760_irnt		MT:5656:A:G	Affx-34462122	0.012804	-0.0037487	0.007191	NA	0.60216	30760_irnt
MT:5656:A:G	Affx-34462122	0.012804	-0.0021016	0.0074225	0.77708	30780_irnt		MT:5656:A:G	Affx-34462122	0.012804	-0.0021231	0.0074225	0.77485	30780_irnt		MT:5656:A:G	Affx-34462122	0.012804	-0.0021231	0.0074225	NA	0.77485	30780_irnt
MT:5656:A:G	Affx-34462122	0.012804	0.016895	0.0073066	0.020762	30870_irnt		MT:5656:A:G	Affx-34462122	0.012804	0.017178	0.0073105	0.018784	30870_irnt		MT:5656:A:G	Affx-34462122	0.012804	0.017178	0.0073105	NA	0.018784	30870_irnt
MT:5656:A:G	Affx-34462122	0.012804	-0.0041904	0.0096231	0.66323	3148_irnt		MT:5656:A:G	Affx-34462122	0.012804	-0.0042908	0.0096234	0.65569	3148_irnt		MT:5656:A:G	Affx-34462122	0.012804	-0.0042908	0.0096234	NA	0.65569	3148_irnt
MT:5656:A:G	Affx-34462122	0.012804	-0.0029769	0.002034	0.14331	3393		MT:5656:A:G	Affx-34462122	0.012804	-0.0029791	0.002034	0.14301	3393		MT:5656:A:G	Affx-34462122	0.012804	-0.067034	NA	2.1187	0.14551	3393
MT:5656:A:G	Affx-34462122	0.012804	-0.0047269	0.007467	0.52671	4079_irnt		MT:5656:A:G	Affx-34462122	0.012804	-0.0046986	0.0074671	0.5292	4079_irnt		MT:5656:A:G	Affx-34462122	0.012804	-0.0046986	0.0074671	NA	0.5292	4079_irnt
MT:5656:A:G	Affx-34462122	0.012804	0.0010771	0.0070705	0.87892	4080_irnt		MT:5656:A:G	Affx-34462122	0.012804	0.0011422	0.007071	0.87167	4080_irnt		MT:5656:A:G	Affx-34462122	0.012804	0.0011422	0.007071	NA	0.87167	4080_irnt
MT:5656:A:G	Affx-34462122	0.012804	-0.0015799	0.0015384	0.30444	C3_SKIN		MT:5656:A:G	Affx-34462122	0.012804	-0.0015861	0.0015384	0.30252	C3_SKIN		MT:5656:A:G	Affx-34462122	0.012804	-0.03664	NA	1.0155	0.31359	C3_SKIN
MT:5656:A:G	Affx-34462122	0.012804	-0.001534	0.0013116	0.24218	H26		MT:5656:A:G	Affx-34462122	0.012804	-0.0015315	0.0013116	0.24295	H26		MT:5656:A:G	Affx-34462122	0.012804	-0.048281	NA	1.2613	0.26141	H26
MT:5656:A:G	Affx-34462122	0.012804	-0.00018684	0.00099727	0.85139	I48		MT:5656:A:G	Affx-34462122	0.012804	-0.00018075	0.00099728	0.85618	I48		MT:5656:A:G	Affx-34462122	0.012804	-0.0074038	NA	0.018021	0.89321	I48
MT:5656:A:G	Affx-34462122	0.012804	-0.00059683	0.0012128	0.62264	I9_CHD		MT:5656:A:G	Affx-34462122	0.012804	-0.00057281	0.0012129	0.63675	I9_CHD		MT:5656:A:G	Affx-34462122	0.012804	-0.021482	NA	0.21899	0.63981	I9_CHD
MT:5656:A:G	Affx-34462122	0.012804	-0.00080997	0.0016916	0.63206	I9_IHD		MT:5656:A:G	Affx-34462122	0.012804	-0.00077287	0.0016919	0.64781	I9_IHD		MT:5656:A:G	Affx-34462122	0.012804	-0.01515	NA	0.21427	0.64344	I9_IHD
MT:5656:A:G	Affx-34462122	0.012804	-3.2414e-05	0.0012908	0.97997	K21		MT:5656:A:G	Affx-34462122	0.012804	-2.2203e-05	0.0012908	0.98628	K21		MT:5656:A:G	Affx-34462122	0.012804	0.00061163	NA	0.00020748	0.98851	K21
MT:5656:A:G	Affx-34462122	0.012804	3.9438e-05	0.0011192	0.97189	K44		MT:5656:A:G	Affx-34462122	0.012804	4.7513e-05	0.0011192	0.96614	K44		MT:5656:A:G	Affx-34462122	0.012804	0.00241	NA	0.0024545	0.96049	K44
MT:5656:A:G	Affx-34462122	0.012804	-0.00019387	0.0013873	0.88886	K57		MT:5656:A:G	Affx-34462122	0.012804	-0.00018094	0.0013873	0.89623	K57		MT:5656:A:G	Affx-34462122	0.012804	-0.0049732	NA	0.015792	0.9	K57
MT:5773:G:A	Affx-79381677	0.0053878	0.0094128	0.005131	0.066581	20002_1065		MT:5773:G:A	Affx-79381677	0.0053878	0.009408	0.0051316	0.06675	20002_1065		MT:5773:G:A	Affx-79381677	0.0053878	0.051094	NA	3.3537	0.067053	20002_1065
MT:5773:G:A	Affx-79381677	0.0053878	-0.00029316	0.0020787	0.88784	20002_1074		MT:5773:G:A	Affx-79381677	0.0053878	-0.00029589	0.0020789	0.88682	20002_1074		MT:5773:G:A	Affx-79381677	0.0053878	-0.0052351	NA	0.0056572	0.94004	20002_1074
MT:5773:G:A	Affx-79381677	0.0053878	-0.00091224	0.0032816	0.78103	20002_1465		MT:5773:G:A	Affx-79381677	0.0053878	-0.00091409	0.0032818	0.7806	20002_1465		MT:5773:G:A	Affx-79381677	0.0053878	-0.0097775	NA	0.048425	0.82583	20002_1465
MT:5773:G:A	Affx-79381677	0.0053878	0.0039369	0.0038451	0.30589	20002_1473		MT:5773:G:A	Affx-79381677	0.0053878	0.0039335	0.0038457	0.30638	20002_1473		MT:5773:G:A	Affx-79381677	0.0053878	0.038666	NA	1.0958	0.29518	20002_1473
MT:5773:G:A	Affx-79381677	0.0053878	0.0019651	0.0025608	0.44285	2443		MT:5773:G:A	Affx-79381677	0.0053878	0.0019609	0.0025615	0.44397	2443		MT:5773:G:A	Affx-79381677	0.0053878	0.044269	NA	0.64165	0.42311	2443
MT:5773:G:A	Affx-79381677	0.0053878	-0.030195	0.011679	0.0097289	30650_irnt		MT:5773:G:A	Affx-79381677	0.0053878	-0.030195	0.011679	0.0097289	30650_irnt		MT:5773:G:A	Affx-79381677	0.0053878	-0.030195	0.011679	NA	0.0097289	30650_irnt
MT:5773:G:A	Affx-79381677	0.0053878	0.0063801	0.009903	0.51941	30700_irnt		MT:5773:G:A	Affx-79381677	0.0053878	0.006384	0.0099033	0.51917	30700_irnt		MT:5773:G:A	Affx-79381677	0.0053878	0.006384	0.0099033	NA	0.51917	30700_irnt
MT:5773:G:A	Affx-79381677	0.0053878	0.0072895	0.012702	0.56604	30740_irnt		MT:5773:G:A	Affx-79381677	0.0053878	0.0072857	0.012702	0.56625	30740_irnt		MT:5773:G:A	Affx-79381677	0.0053878	0.0072857	0.012702	NA	0.56625	30740_irnt
MT:5773:G:A	Affx-79381677	0.0053878	-0.0088419	0.011634	0.44726	30760_irnt		MT:5773:G:A	Affx-79381677	0.0053878	-0.0088261	0.011639	0.44827	30760_irnt		MT:5773:G:A	Affx-79381677	0.0053878	-0.0088261	0.011639	NA	0.44827	30760_irnt
MT:5773:G:A	Affx-79381677	0.0053878	-0.0070179	0.012046	0.56018	30780_irnt		MT:5773:G:A	Affx-79381677	0.0053878	-0.0070149	0.012046	0.56035	30780_irnt		MT:5773:G:A	Affx-79381677	0.0053878	-0.0070149	0.012046	NA	0.56035	30780_irnt
MT:5773:G:A	Affx-79381677	0.0053878	-0.017572	0.011855	0.13825	30870_irnt		MT:5773:G:A	Affx-79381677	0.0053878	-0.017592	0.011861	0.13803	30870_irnt		MT:5773:G:A	Affx-79381677	0.0053878	-0.017592	0.011861	NA	0.13803	30870_irnt
MT:5773:G:A	Affx-79381677	0.0053878	0.02049	0.015171	0.17684	3148_irnt		MT:5773:G:A	Affx-79381677	0.0053878	0.020502	0.015172	0.1766	3148_irnt		MT:5773:G:A	Affx-79381677	0.0053878	0.020502	0.015172	NA	0.1766	3148_irnt
MT:5773:G:A	Affx-79381677	0.0053878	-0.0025481	0.0033552	0.44759	3393		MT:5773:G:A	Affx-79381677	0.0053878	-0.0025477	0.0033552	0.44765	3393		MT:5773:G:A	Affx-79381677	0.0053878	-0.053145	NA	0.52112	0.47036	3393
MT:5773:G:A	Affx-79381677	0.0053878	0.031355	0.012121	0.0096838	4079_irnt		MT:5773:G:A	Affx-79381677	0.0053878	0.031356	0.012121	0.0096834	4079_irnt		MT:5773:G:A	Affx-79381677	0.0053878	0.031356	0.012121	NA	0.0096834	4079_irnt
MT:5773:G:A	Affx-79381677	0.0053878	0.016743	0.011477	0.1446	4080_irnt		MT:5773:G:A	Affx-79381677	0.0053878	0.016738	0.011478	0.14476	4080_irnt		MT:5773:G:A	Affx-79381677	0.0053878	0.016738	0.011478	NA	0.14476	4080_irnt
MT:5773:G:A	Affx-79381677	0.0053878	-0.00087379	0.0025039	0.72711	C3_SKIN		MT:5773:G:A	Affx-79381677	0.0053878	-0.00087328	0.0025039	0.72726	C3_SKIN		MT:5773:G:A	Affx-79381677	0.0053878	-0.017409	NA	0.088535	0.76605	C3_SKIN
MT:5773:G:A	Affx-79381677	0.0053878	0.0025231	0.0021347	0.23724	H26		MT:5773:G:A	Affx-79381677	0.0053878	0.0025229	0.0021347	0.23727	H26		MT:5773:G:A	Affx-79381677	0.0053878	0.076553	NA	1.4081	0.23537	H26
MT:5773:G:A	Affx-79381677	0.0053878	-0.00068075	0.0016232	0.67493	I48		MT:5773:G:A	Affx-79381677	0.0053878	-0.00068117	0.0016232	0.67474	I48		MT:5773:G:A	Affx-79381677	0.0053878	-0.030245	NA	0.11139	0.73857	I48
MT:5773:G:A	Affx-79381677	0.0053878	0.0017744	0.0019739	0.3687	I9_CHD		MT:5773:G:A	Affx-79381677	0.0053878	0.0017727	0.0019742	0.36922	I9_CHD		MT:5773:G:A	Affx-79381677	0.0053878	0.066222	NA	0.88897	0.34576	I9_CHD
MT:5773:G:A	Affx-79381677	0.0053878	0.0020317	0.0027532	0.46055	I9_IHD		MT:5773:G:A	Affx-79381677	0.0053878	0.0020278	0.0027537	0.46149	I9_IHD		MT:5773:G:A	Affx-79381677	0.0053878	0.039477	NA	0.59185	0.44171	I9_IHD
MT:5773:G:A	Affx-79381677	0.0053878	4.1233e-05	0.0021009	0.98434	K21		MT:5773:G:A	Affx-79381677	0.0053878	4.0583e-05	0.0021009	0.98459	K21		MT:5773:G:A	Affx-79381677	0.0053878	0.0056283	NA	0.0066887	0.93482	K21
MT:5773:G:A	Affx-79381677	0.0053878	-0.0020173	0.0018215	0.26809	K44		MT:5773:G:A	Affx-79381677	0.0053878	-0.0020179	0.0018216	0.26797	K44		MT:5773:G:A	Affx-79381677	0.0053878	-0.089772	NA	1.128	0.2882	K44
MT:5773:G:A	Affx-79381677	0.0053878	0.00018542	0.002258	0.93455	K57		MT:5773:G:A	Affx-79381677	0.0053878	0.00018453	0.002258	0.93487	K57		MT:5773:G:A	Affx-79381677	0.0053878	0.0090745	NA	0.020242	0.88686	K57
MT:5951:A:G	Affx-34462135	0.0002087	-0.004516	0.059629	0.93963	30650_irnt		MT:5951:A:G	Affx-34462135	0.0002087	-0.0045244	0.059629	0.93952	30650_irnt		MT:5951:A:G	Affx-34462135	0.0002087	-0.0045244	0.059629	NA	0.93952	30650_irnt
MT:5951:A:G	Affx-34462135	0.0002087	-0.032513	0.050606	0.52056	30700_irnt		MT:5951:A:G	Affx-34462135	0.0002087	-0.032535	0.050607	0.5203	30700_irnt		MT:5951:A:G	Affx-34462135	0.0002087	-0.032535	0.050607	NA	0.5203	30700_irnt
MT:5951:A:G	Affx-34462135	0.0002087	-0.1231	0.065867	0.061627	30740_irnt		MT:5951:A:G	Affx-34462135	0.0002087	-0.12307	0.065868	0.061699	30740_irnt		MT:5951:A:G	Affx-34462135	0.0002087	-0.12307	0.065868	NA	0.061699	30740_irnt
MT:5951:A:G	Affx-34462135	0.0002087	-0.054549	0.060311	0.36575	30760_irnt		MT:5951:A:G	Affx-34462135	0.0002087	-0.054677	0.060337	0.36484	30760_irnt		MT:5951:A:G	Affx-34462135	0.0002087	-0.054677	0.060337	NA	0.36484	30760_irnt
MT:5951:A:G	Affx-34462135	0.0002087	-0.0054802	0.061447	0.92893	30780_irnt		MT:5951:A:G	Affx-34462135	0.0002087	-0.0054874	0.061447	0.92884	30780_irnt		MT:5951:A:G	Affx-34462135	0.0002087	-0.0054874	0.061447	NA	0.92884	30780_irnt
MT:5951:A:G	Affx-34462135	0.0002087	0.035717	0.060543	0.55523	30870_irnt		MT:5951:A:G	Affx-34462135	0.0002087	0.035818	0.060575	0.55432	30870_irnt		MT:5951:A:G	Affx-34462135	0.0002087	0.035818	0.060575	NA	0.55432	30870_irnt
MT:5951:A:G	Affx-34462135	0.0002087	-0.075238	0.074487	0.31246	3148_irnt		MT:5951:A:G	Affx-34462135	0.0002087	-0.075257	0.07449	0.31236	3148_irnt		MT:5951:A:G	Affx-34462135	0.0002087	-0.075257	0.07449	NA	0.31236	3148_irnt
MT:5951:A:G	Affx-34462135	0.0002087	-0.025369	0.060738	0.67618	4079_irnt		MT:5951:A:G	Affx-34462135	0.0002087	-0.025356	0.060739	0.67634	4079_irnt		MT:5951:A:G	Affx-34462135	0.0002087	-0.025356	0.060739	NA	0.67634	4079_irnt
MT:5951:A:G	Affx-34462135	0.0002087	-0.031948	0.057512	0.57855	4080_irnt		MT:5951:A:G	Affx-34462135	0.0002087	-0.031922	0.057516	0.57889	4080_irnt		MT:5951:A:G	Affx-34462135	0.0002087	-0.031922	0.057516	NA	0.57889	4080_irnt
MT:5999:T:C	Affx-79443437	0.02059	-0.00099662	0.0026447	0.70629	20002_1065		MT:5999:T:C	Affx-79443437	0.02059	-0.00099219	0.0026449	0.70757	20002_1065		MT:5999:T:C	Affx-79443437	0.02059	-0.005185	NA	0.12528	0.72338	20002_1065
MT:5999:T:C	Affx-79443437	0.02059	-0.00016622	0.0010714	0.87671	20002_1074		MT:5999:T:C	Affx-79443437	0.02059	-0.00016553	0.0010715	0.87723	20002_1074		MT:5999:T:C	Affx-79443437	0.02059	-0.0034884	NA	0.0091948	0.92361	20002_1074
MT:5999:T:C	Affx-79443437	0.02059	-0.0039599	0.0016914	0.019225	20002_1465		MT:5999:T:C	Affx-79443437	0.02059	-0.0039572	0.0016915	0.019313	20002_1465		MT:5999:T:C	Affx-79443437	0.02059	-0.054244	NA	5.3092	0.021213	20002_1465
MT:5999:T:C	Affx-79443437	0.02059	0.00050153	0.0019819	0.80022	20002_1473		MT:5999:T:C	Affx-79443437	0.02059	0.00050642	0.0019822	0.79835	20002_1473		MT:5999:T:C	Affx-79443437	0.02059	0.0057815	NA	0.088121	0.76658	20002_1473
MT:5999:T:C	Affx-79443437	0.02059	0.00071244	0.0013201	0.58942	2443		MT:5999:T:C	Affx-79443437	0.02059	0.00071525	0.0013205	0.58806	2443		MT:5999:T:C	Affx-79443437	0.02059	0.016609	NA	0.32543	0.56836	2443
MT:5999:T:C	Affx-79443437	0.02059	-0.0013291	0.0060363	0.82572	30650_irnt		MT:5999:T:C	Affx-79443437	0.02059	-0.0013323	0.0060363	0.82531	30650_irnt		MT:5999:T:C	Affx-79443437	0.02059	-0.0013323	0.0060363	NA	0.82531	30650_irnt
MT:5999:T:C	Affx-79443437	0.02059	-0.00025497	0.0051155	0.96025	30700_irnt		MT:5999:T:C	Affx-79443437	0.02059	-0.00026035	0.0051157	0.95941	30700_irnt		MT:5999:T:C	Affx-79443437	0.02059	-0.00026035	0.0051157	NA	0.95941	30700_irnt
MT:5999:T:C	Affx-79443437	0.02059	0.0023843	0.0065693	0.71665	30740_irnt		MT:5999:T:C	Affx-79443437	0.02059	0.0023911	0.0065695	0.71588	30740_irnt		MT:5999:T:C	Affx-79443437	0.02059	0.0023911	0.0065695	NA	0.71588	30740_irnt
MT:5999:T:C	Affx-79443437	0.02059	0.010625	0.0060131	0.077238	30760_irnt		MT:5999:T:C	Affx-79443437	0.02059	0.0106	0.0060157	0.078071	30760_irnt		MT:5999:T:C	Affx-79443437	0.02059	0.0106	0.0060157	NA	0.078071	30760_irnt
MT:5999:T:C	Affx-79443437	0.02059	-0.0024016	0.0062143	0.69915	30780_irnt		MT:5999:T:C	Affx-79443437	0.02059	-0.0024021	0.0062143	0.69909	30780_irnt		MT:5999:T:C	Affx-79443437	0.02059	-0.0024021	0.0062143	NA	0.69909	30780_irnt
MT:5999:T:C	Affx-79443437	0.02059	-0.0051485	0.0061205	0.40024	30870_irnt		MT:5999:T:C	Affx-79443437	0.02059	-0.0051242	0.0061237	0.40271	30870_irnt		MT:5999:T:C	Affx-79443437	0.02059	-0.0051242	0.0061237	NA	0.40271	30870_irnt
MT:5999:T:C	Affx-79443437	0.02059	-0.016662	0.0079419	0.035908	3148_irnt		MT:5999:T:C	Affx-79443437	0.02059	-0.016668	0.0079423	0.03585	3148_irnt		MT:5999:T:C	Affx-79443437	0.02059	-0.016668	0.0079423	NA	0.03585	3148_irnt
MT:5999:T:C	Affx-79443437	0.02059	0.00083771	0.0017168	0.62558	3393		MT:5999:T:C	Affx-79443437	0.02059	0.00083718	0.0017167	0.62579	3393		MT:5999:T:C	Affx-79443437	0.02059	0.019575	NA	0.28381	0.59421	3393
MT:5999:T:C	Affx-79443437	0.02059	-0.0077951	0.0062635	0.2133	4079_irnt		MT:5999:T:C	Affx-79443437	0.02059	-0.0077877	0.0062636	0.21374	4079_irnt		MT:5999:T:C	Affx-79443437	0.02059	-0.0077877	0.0062636	NA	0.21374	4079_irnt
MT:5999:T:C	Affx-79443437	0.02059	-0.00085202	0.0059308	0.88577	4080_irnt		MT:5999:T:C	Affx-79443437	0.02059	-0.0008412	0.0059313	0.88722	4080_irnt		MT:5999:T:C	Affx-79443437	0.02059	-0.0008412	0.0059313	NA	0.88722	4080_irnt
MT:5999:T:C	Affx-79443437	0.02059	0.0013686	0.0012905	0.28891	C3_SKIN		MT:5999:T:C	Affx-79443437	0.02059	0.0013681	0.0012905	0.2891	C3_SKIN		MT:5999:T:C	Affx-79443437	0.02059	0.031545	NA	1.1511	0.28333	C3_SKIN
MT:5999:T:C	Affx-79443437	0.02059	0.00018859	0.0011003	0.86391	H26		MT:5999:T:C	Affx-79443437	0.02059	0.00018885	0.0011003	0.86372	H26		MT:5999:T:C	Affx-79443437	0.02059	0.0047993	NA	0.019062	0.89019	H26
MT:5999:T:C	Affx-79443437	0.02059	-0.001384	0.00083661	0.098079	I48		MT:5999:T:C	Affx-79443437	0.02059	-0.0013834	0.00083661	0.098223	I48		MT:5999:T:C	Affx-79443437	0.02059	-0.080043	NA	2.7279	0.098611	I48
MT:5999:T:C	Affx-79443437	0.02059	0.00029298	0.0010174	0.77337	I9_CHD		MT:5999:T:C	Affx-79443437	0.02059	0.00029522	0.0010175	0.77171	I9_CHD		MT:5999:T:C	Affx-79443437	0.02059	0.012862	NA	0.11474	0.73481	I9_CHD
MT:5999:T:C	Affx-79443437	0.02059	-0.000224	0.001419	0.87457	I9_IHD		MT:5999:T:C	Affx-79443437	0.02059	-0.00022179	0.0014193	0.87582	I9_IHD		MT:5999:T:C	Affx-79443437	0.02059	-0.0029689	NA	0.011722	0.91378	I9_IHD
MT:5999:T:C	Affx-79443437	0.02059	-0.001123	0.0010828	0.29967	K21		MT:5999:T:C	Affx-79443437	0.02059	-0.001122	0.0010829	0.30012	K21		MT:5999:T:C	Affx-79443437	0.02059	-0.036905	NA	1.0166	0.31332	K21
MT:5999:T:C	Affx-79443437	0.02059	-0.0011214	0.00093886	0.23232	K44		MT:5999:T:C	Affx-79443437	0.02059	-0.0011206	0.00093887	0.23264	K44		MT:5999:T:C	Affx-79443437	0.02059	-0.049851	NA	1.367	0.24232	K44
MT:5999:T:C	Affx-79443437	0.02059	0.00099941	0.0011638	0.39048	K57		MT:5999:T:C	Affx-79443437	0.02059	0.0010006	0.0011638	0.38991	K57		MT:5999:T:C	Affx-79443437	0.02059	0.02903	NA	0.78759	0.37483	K57
MT:6047:A:G	Affx-79443438	0.020644	-0.0012788	0.0026407	0.6282	20002_1065		MT:6047:A:G	Affx-79443438	0.020644	-0.0012745	0.002641	0.6294	20002_1065		MT:6047:A:G	Affx-79443438	0.020644	-0.006811	NA	0.21667	0.64159	20002_1065
MT:6047:A:G	Affx-79443438	0.020644	6.2514e-05	0.0010698	0.9534	20002_1074		MT:6047:A:G	Affx-79443438	0.020644	6.3175e-05	0.0010699	0.95292	20002_1074		MT:6047:A:G	Affx-79443438	0.020644	0.004031	NA	0.01244	0.91119	20002_1074
MT:6047:A:G	Affx-79443438	0.020644	-0.0039839	0.0016889	0.018333	20002_1465		MT:6047:A:G	Affx-79443438	0.020644	-0.0039813	0.001689	0.018416	20002_1465		MT:6047:A:G	Affx-79443438	0.020644	-0.0546	NA	5.3917	0.020233	20002_1465
MT:6047:A:G	Affx-79443438	0.020644	0.00035204	0.0019789	0.85881	20002_1473		MT:6047:A:G	Affx-79443438	0.020644	0.00035684	0.0019792	0.85692	20002_1473		MT:6047:A:G	Affx-79443438	0.020644	0.0042428	NA	0.047568	0.82735	20002_1473
MT:6047:A:G	Affx-79443438	0.020644	0.00063083	0.0013182	0.63225	2443		MT:6047:A:G	Affx-79443438	0.020644	0.00063357	0.0013186	0.63087	2443		MT:6047:A:G	Affx-79443438	0.020644	0.014756	NA	0.25732	0.61196	2443
MT:6047:A:G	Affx-79443438	0.020644	-0.0035871	0.006032	0.55206	30650_irnt		MT:6047:A:G	Affx-79443438	0.020644	-0.0035903	0.006032	0.5517	30650_irnt		MT:6047:A:G	Affx-79443438	0.020644	-0.0035903	0.006032	NA	0.5517	30650_irnt
MT:6047:A:G	Affx-79443438	0.020644	-0.00083141	0.0051103	0.87076	30700_irnt		MT:6047:A:G	Affx-79443438	0.020644	-0.00083671	0.0051105	0.86995	30700_irnt		MT:6047:A:G	Affx-79443438	0.020644	-0.00083671	0.0051105	NA	0.86995	30700_irnt
MT:6047:A:G	Affx-79443438	0.020644	0.0020792	0.0065648	0.75146	30740_irnt		MT:6047:A:G	Affx-79443438	0.020644	0.0020859	0.0065649	0.75068	30740_irnt		MT:6047:A:G	Affx-79443438	0.020644	0.0020859	0.0065649	NA	0.75068	30740_irnt
MT:6047:A:G	Affx-79443438	0.020644	0.011591	0.0060094	0.053755	30760_irnt		MT:6047:A:G	Affx-79443438	0.020644	0.011566	0.006012	0.054374	30760_irnt		MT:6047:A:G	Affx-79443438	0.020644	0.011566	0.006012	NA	0.054374	30760_irnt
MT:6047:A:G	Affx-79443438	0.020644	-0.0012328	0.0062094	0.84263	30780_irnt		MT:6047:A:G	Affx-79443438	0.020644	-0.0012333	0.0062094	0.84256	30780_irnt		MT:6047:A:G	Affx-79443438	0.020644	-0.0012333	0.0062094	NA	0.84256	30780_irnt
MT:6047:A:G	Affx-79443438	0.020644	-0.0017029	0.0061142	0.78062	30870_irnt		MT:6047:A:G	Affx-79443438	0.020644	-0.0016789	0.0061175	0.78374	30870_irnt		MT:6047:A:G	Affx-79443438	0.020644	-0.0016789	0.0061175	NA	0.78374	30870_irnt
MT:6047:A:G	Affx-79443438	0.020644	-0.02012	0.0079296	0.011172	3148_irnt		MT:6047:A:G	Affx-79443438	0.020644	-0.020126	0.0079299	0.011151	3148_irnt		MT:6047:A:G	Affx-79443438	0.020644	-0.020126	0.0079299	NA	0.011151	3148_irnt
MT:6047:A:G	Affx-79443438	0.020644	0.00046559	0.0017163	0.78618	3393		MT:6047:A:G	Affx-79443438	0.020644	0.00046507	0.0017163	0.78641	3393		MT:6047:A:G	Affx-79443438	0.020644	0.011746	NA	0.10126	0.75033	3393
MT:6047:A:G	Affx-79443438	0.020644	-0.0074063	0.0062522	0.23618	4079_irnt		MT:6047:A:G	Affx-79443438	0.020644	-0.0073991	0.0062523	0.23664	4079_irnt		MT:6047:A:G	Affx-79443438	0.020644	-0.0073991	0.0062523	NA	0.23664	4079_irnt
MT:6047:A:G	Affx-79443438	0.020644	-0.0014095	0.0059201	0.81181	4080_irnt		MT:6047:A:G	Affx-79443438	0.020644	-0.0013991	0.0059206	0.81319	4080_irnt		MT:6047:A:G	Affx-79443438	0.020644	-0.0013991	0.0059206	NA	0.81319	4080_irnt
MT:6047:A:G	Affx-79443438	0.020644	0.0015103	0.0012886	0.2412	C3_SKIN		MT:6047:A:G	Affx-79443438	0.020644	0.0015097	0.0012886	0.24136	C3_SKIN		MT:6047:A:G	Affx-79443438	0.020644	0.034692	NA	1.4016	0.23645	C3_SKIN
MT:6047:A:G	Affx-79443438	0.020644	-0.00032964	0.0010987	0.76415	H26		MT:6047:A:G	Affx-79443438	0.020644	-0.00032939	0.0010986	0.76432	H26		MT:6047:A:G	Affx-79443438	0.020644	-0.011423	NA	0.10634	0.74435	H26
MT:6047:A:G	Affx-79443438	0.020644	-0.0017982	0.00083536	0.031348	I48		MT:6047:A:G	Affx-79443438	0.020644	-0.0017977	0.00083537	0.031404	I48		MT:6047:A:G	Affx-79443438	0.020644	-0.10704	NA	4.7427	0.029423	I48
MT:6047:A:G	Affx-79443438	0.020644	0.00076871	0.0010159	0.44924	I9_CHD		MT:6047:A:G	Affx-79443438	0.020644	0.00077091	0.001016	0.448	I9_CHD		MT:6047:A:G	Affx-79443438	0.020644	0.029936	NA	0.63675	0.42489	I9_CHD
MT:6047:A:G	Affx-79443438	0.020644	0.00041661	0.0014169	0.76874	I9_IHD		MT:6047:A:G	Affx-79443438	0.020644	0.00041876	0.0014172	0.76762	I9_IHD		MT:6047:A:G	Affx-79443438	0.020644	0.0091411	NA	0.11302	0.73673	I9_IHD
MT:6047:A:G	Affx-79443438	0.020644	-0.0010245	0.0010812	0.34337	K21		MT:6047:A:G	Affx-79443438	0.020644	-0.0010235	0.0010812	0.34385	K21		MT:6047:A:G	Affx-79443438	0.020644	-0.033443	NA	0.84098	0.35912	K21
MT:6047:A:G	Affx-79443438	0.020644	-0.0011488	0.00093746	0.22043	K44		MT:6047:A:G	Affx-79443438	0.020644	-0.001148	0.00093747	0.22074	K44		MT:6047:A:G	Affx-79443438	0.020644	-0.051082	NA	1.4373	0.23058	K44
MT:6047:A:G	Affx-79443438	0.020644	0.0011677	0.0011621	0.31498	K57		MT:6047:A:G	Affx-79443438	0.020644	0.0011689	0.0011621	0.3145	K57		MT:6047:A:G	Affx-79443438	0.020644	0.033601	NA	1.0639	0.30232	K57
MT:6185:T:C	Affx-89025671	0.00035789	0.0094629	0.018726	0.61331	20002_1065		MT:6185:T:C	Affx-89025671	0.00035789	0.0087753	0.018727	0.63937	20002_1065		MT:6185:T:C	Affx-89025671	0.00035789	0.050976	NA	0.24604	0.61988	20002_1065
MT:6185:T:C	Affx-89025671	0.00035789	0.014093	0.042853	0.74226	30650_irnt		MT:6185:T:C	Affx-89025671	0.00035789	0.014328	0.042852	0.73811	30650_irnt		MT:6185:T:C	Affx-89025671	0.00035789	0.014328	0.042852	NA	0.73811	30650_irnt
MT:6185:T:C	Affx-89025671	0.00035789	-0.043077	0.03622	0.23431	30700_irnt		MT:6185:T:C	Affx-89025671	0.00035789	-0.042366	0.036221	0.24213	30700_irnt		MT:6185:T:C	Affx-89025671	0.00035789	-0.042366	0.036221	NA	0.24213	30700_irnt
MT:6185:T:C	Affx-89025671	0.00035789	0.0012124	0.046168	0.97905	30740_irnt		MT:6185:T:C	Affx-89025671	0.00035789	0.00051967	0.046169	0.99102	30740_irnt		MT:6185:T:C	Affx-89025671	0.00035789	0.00051967	0.046169	NA	0.99102	30740_irnt
MT:6185:T:C	Affx-89025671	0.00035789	0.0059426	0.042274	0.88821	30760_irnt		MT:6185:T:C	Affx-89025671	0.00035789	0.0086639	0.042292	0.83768	30760_irnt		MT:6185:T:C	Affx-89025671	0.00035789	0.0086639	0.042292	NA	0.83768	30760_irnt
MT:6185:T:C	Affx-89025671	0.00035789	-0.017673	0.043979	0.68779	30780_irnt		MT:6185:T:C	Affx-89025671	0.00035789	-0.017396	0.043979	0.69244	30780_irnt		MT:6185:T:C	Affx-89025671	0.00035789	-0.017396	0.043979	NA	0.69244	30780_irnt
MT:6185:T:C	Affx-89025671	0.00035789	-0.0065904	0.043332	0.87911	30870_irnt		MT:6185:T:C	Affx-89025671	0.00035789	-0.0099263	0.043355	0.8189	30870_irnt		MT:6185:T:C	Affx-89025671	0.00035789	-0.0099263	0.043355	NA	0.8189	30870_irnt
MT:6185:T:C	Affx-89025671	0.00035789	-0.078282	0.056895	0.16885	3148_irnt		MT:6185:T:C	Affx-89025671	0.00035789	-0.077292	0.056897	0.17432	3148_irnt		MT:6185:T:C	Affx-89025671	0.00035789	-0.077292	0.056897	NA	0.17432	3148_irnt
MT:6185:T:C	Affx-89025671	0.00035789	0.0637	0.043456	0.14269	4079_irnt		MT:6185:T:C	Affx-89025671	0.00035789	0.063198	0.043456	0.14586	4079_irnt		MT:6185:T:C	Affx-89025671	0.00035789	0.063198	0.043456	NA	0.14586	4079_irnt
MT:6185:T:C	Affx-89025671	0.00035789	0.01304	0.041148	0.75131	4080_irnt		MT:6185:T:C	Affx-89025671	0.00035789	0.011793	0.04115	0.77443	4080_irnt		MT:6185:T:C	Affx-89025671	0.00035789	0.011793	0.04115	NA	0.77443	4080_irnt
MT:6221:T:C	Affx-79381678	0.01533	-0.0041093	0.0030557	0.1787	20002_1065		MT:6221:T:C	Affx-79381678	0.01533	-0.0041063	0.0030561	0.17907	20002_1065		MT:6221:T:C	Affx-79381678	0.01533	-0.023266	NA	1.8525	0.1735	20002_1065
MT:6221:T:C	Affx-79381678	0.01533	0.00078424	0.0012379	0.5264	20002_1074		MT:6221:T:C	Affx-79381678	0.01533	0.00078418	0.0012381	0.52649	20002_1074		MT:6221:T:C	Affx-79381678	0.01533	0.027259	NA	0.42889	0.51254	20002_1074
MT:6221:T:C	Affx-79381678	0.01533	-0.0006603	0.0019544	0.73547	20002_1465		MT:6221:T:C	Affx-79381678	0.01533	-0.00065819	0.0019545	0.7363	20002_1465		MT:6221:T:C	Affx-79381678	0.01533	-0.0091352	NA	0.11804	0.73117	20002_1465
MT:6221:T:C	Affx-79381678	0.01533	0.0036049	0.0022899	0.11543	20002_1473		MT:6221:T:C	Affx-79381678	0.01533	0.0036087	0.0022903	0.1151	20002_1473		MT:6221:T:C	Affx-79381678	0.01533	0.035627	NA	2.5332	0.11147	20002_1473
MT:6221:T:C	Affx-79381678	0.01533	-0.0023781	0.0015259	0.11911	2443		MT:6221:T:C	Affx-79381678	0.01533	-0.0023764	0.0015263	0.11948	2443		MT:6221:T:C	Affx-79381678	0.01533	-0.055429	NA	2.4614	0.11668	2443
MT:6221:T:C	Affx-79381678	0.01533	0.004146	0.0069708	0.552	30650_irnt		MT:6221:T:C	Affx-79381678	0.01533	0.004143	0.0069707	0.55229	30650_irnt		MT:6221:T:C	Affx-79381678	0.01533	0.004143	0.0069707	NA	0.55229	30650_irnt
MT:6221:T:C	Affx-79381678	0.01533	-0.0093474	0.005912	0.11386	30700_irnt		MT:6221:T:C	Affx-79381678	0.01533	-0.0093513	0.0059122	0.11372	30700_irnt		MT:6221:T:C	Affx-79381678	0.01533	-0.0093513	0.0059122	NA	0.11372	30700_irnt
MT:6221:T:C	Affx-79381678	0.01533	-0.0080682	0.0075702	0.28652	30740_irnt		MT:6221:T:C	Affx-79381678	0.01533	-0.0080631	0.0075703	0.28683	30740_irnt		MT:6221:T:C	Affx-79381678	0.01533	-0.0080631	0.0075703	NA	0.28683	30740_irnt
MT:6221:T:C	Affx-79381678	0.01533	-0.013204	0.0069299	0.056742	30760_irnt		MT:6221:T:C	Affx-79381678	0.01533	-0.013224	0.006933	0.056464	30760_irnt		MT:6221:T:C	Affx-79381678	0.01533	-0.013224	0.006933	NA	0.056464	30760_irnt
MT:6221:T:C	Affx-79381678	0.01533	0.0020916	0.0071801	0.77082	30780_irnt		MT:6221:T:C	Affx-79381678	0.01533	0.002092	0.0071801	0.77077	30780_irnt		MT:6221:T:C	Affx-79381678	0.01533	0.002092	0.0071801	NA	0.77077	30780_irnt
MT:6221:T:C	Affx-79381678	0.01533	-0.00057316	0.0070737	0.93542	30870_irnt		MT:6221:T:C	Affx-79381678	0.01533	-0.00055437	0.0070774	0.93757	30870_irnt		MT:6221:T:C	Affx-79381678	0.01533	-0.00055437	0.0070774	NA	0.93757	30870_irnt
MT:6221:T:C	Affx-79381678	0.01533	-0.0018406	0.0090985	0.83968	3148_irnt		MT:6221:T:C	Affx-79381678	0.01533	-0.0018426	0.0090989	0.83952	3148_irnt		MT:6221:T:C	Affx-79381678	0.01533	-0.0018426	0.0090989	NA	0.83952	3148_irnt
MT:6221:T:C	Affx-79381678	0.01533	0.0032217	0.0019732	0.10253	3393		MT:6221:T:C	Affx-79381678	0.01533	0.0032215	0.0019732	0.10254	3393		MT:6221:T:C	Affx-79381678	0.01533	0.067005	NA	2.6687	0.10234	3393
MT:6221:T:C	Affx-79381678	0.01533	-0.0034135	0.00724	0.6373	4079_irnt		MT:6221:T:C	Affx-79381678	0.01533	-0.0034062	0.0072401	0.63803	4079_irnt		MT:6221:T:C	Affx-79381678	0.01533	-0.0034062	0.0072401	NA	0.63803	4079_irnt
MT:6221:T:C	Affx-79381678	0.01533	-0.001642	0.0068555	0.81071	4080_irnt		MT:6221:T:C	Affx-79381678	0.01533	-0.0016329	0.006856	0.81174	4080_irnt		MT:6221:T:C	Affx-79381678	0.01533	-0.0016329	0.006856	NA	0.81174	4080_irnt
MT:6221:T:C	Affx-79381678	0.01533	0.00015	0.0014916	0.9199	C3_SKIN		MT:6221:T:C	Affx-79381678	0.01533	0.0001496	0.0014916	0.92011	C3_SKIN		MT:6221:T:C	Affx-79381678	0.01533	0.0045851	NA	0.017431	0.89496	C3_SKIN
MT:6221:T:C	Affx-79381678	0.01533	0.0020372	0.0012717	0.10916	H26		MT:6221:T:C	Affx-79381678	0.01533	0.0020374	0.0012717	0.10913	H26		MT:6221:T:C	Affx-79381678	0.01533	0.063884	NA	2.6386	0.1043	H26
MT:6221:T:C	Affx-79381678	0.01533	0.0025363	0.00096693	0.008716	I48		MT:6221:T:C	Affx-79381678	0.01533	0.0025367	0.00096694	0.0087042	I48		MT:6221:T:C	Affx-79381678	0.01533	0.13017	NA	6.7901	0.0091665	I48
MT:6221:T:C	Affx-79381678	0.01533	-0.0002309	0.0011759	0.84433	I9_CHD		MT:6221:T:C	Affx-79381678	0.01533	-0.00022911	0.001176	0.84554	I9_CHD		MT:6221:T:C	Affx-79381678	0.01533	-0.0069121	NA	0.023779	0.87745	I9_CHD
MT:6221:T:C	Affx-79381678	0.01533	-0.0012404	0.0016401	0.44948	I9_IHD		MT:6221:T:C	Affx-79381678	0.01533	-0.0012392	0.0016404	0.44999	I9_IHD		MT:6221:T:C	Affx-79381678	0.01533	-0.02437	NA	0.56703	0.45144	I9_IHD
MT:6221:T:C	Affx-79381678	0.01533	-0.0014003	0.0012515	0.26319	K21		MT:6221:T:C	Affx-79381678	0.01533	-0.0013995	0.0012515	0.26348	K21		MT:6221:T:C	Affx-79381678	0.01533	-0.046923	NA	1.2155	0.27024	K21
MT:6221:T:C	Affx-79381678	0.01533	-0.00058694	0.0010851	0.58858	K44		MT:6221:T:C	Affx-79381678	0.01533	-0.00058631	0.0010851	0.58898	K44		MT:6221:T:C	Affx-79381678	0.01533	-0.024789	NA	0.26092	0.60949	K44
MT:6221:T:C	Affx-79381678	0.01533	0.00035662	0.0013451	0.79091	K57		MT:6221:T:C	Affx-79381678	0.01533	0.0003576	0.0013451	0.79036	K57		MT:6221:T:C	Affx-79381678	0.01533	0.011579	NA	0.091241	0.76261	K57
MT:6253:T:C	Affx-92047851	0.0018085	-0.027928	0.0088375	0.0015769	20002_1065		MT:6253:T:C	Affx-92047851	0.0018085	-0.027916	0.0088385	0.0015862	20002_1065		MT:6253:T:C	Affx-92047851	0.0018085	-0.16405	NA	10.242	0.001373	20002_1065
MT:6253:T:C	Affx-92047851	0.0018085	-0.0057955	0.0056523	0.3052	20002_1465		MT:6253:T:C	Affx-92047851	0.0018085	-0.00579	0.0056526	0.30569	20002_1465		MT:6253:T:C	Affx-92047851	0.0018085	-0.077226	NA	0.96258	0.32654	20002_1465
MT:6253:T:C	Affx-92047851	0.0018085	-0.0082575	0.0066228	0.21246	20002_1473		MT:6253:T:C	Affx-92047851	0.0018085	-0.0082472	0.0066237	0.2131	20002_1473		MT:6253:T:C	Affx-92047851	0.0018085	-0.081725	NA	1.4638	0.22633	20002_1473
MT:6253:T:C	Affx-92047851	0.0018085	-0.0054899	0.0044081	0.21298	2443		MT:6253:T:C	Affx-92047851	0.0018085	-0.0054807	0.0044094	0.21389	2443		MT:6253:T:C	Affx-92047851	0.0018085	-0.12758	NA	1.4396	0.23021	2443
MT:6253:T:C	Affx-92047851	0.0018085	0.007165	0.020125	0.72182	30650_irnt		MT:6253:T:C	Affx-92047851	0.0018085	0.0071627	0.020125	0.7219	30650_irnt		MT:6253:T:C	Affx-92047851	0.0018085	0.0071627	0.020125	NA	0.7219	30650_irnt
MT:6253:T:C	Affx-92047851	0.0018085	-0.015948	0.017033	0.34911	30700_irnt		MT:6253:T:C	Affx-92047851	0.0018085	-0.01596	0.017034	0.34878	30700_irnt		MT:6253:T:C	Affx-92047851	0.0018085	-0.01596	0.017034	NA	0.34878	30700_irnt
MT:6253:T:C	Affx-92047851	0.0018085	-0.022403	0.021592	0.29946	30740_irnt		MT:6253:T:C	Affx-92047851	0.0018085	-0.022392	0.021592	0.29972	30740_irnt		MT:6253:T:C	Affx-92047851	0.0018085	-0.022392	0.021592	NA	0.29972	30740_irnt
MT:6253:T:C	Affx-92047851	0.0018085	0.013167	0.019771	0.50541	30760_irnt		MT:6253:T:C	Affx-92047851	0.0018085	0.013126	0.019779	0.50694	30760_irnt		MT:6253:T:C	Affx-92047851	0.0018085	0.013126	0.019779	NA	0.50694	30760_irnt
MT:6253:T:C	Affx-92047851	0.0018085	0.028069	0.020701	0.17512	30780_irnt		MT:6253:T:C	Affx-92047851	0.0018085	0.028067	0.020701	0.17515	30780_irnt		MT:6253:T:C	Affx-92047851	0.0018085	0.028067	0.020701	NA	0.17515	30780_irnt
MT:6253:T:C	Affx-92047851	0.0018085	-0.010514	0.020378	0.6059	30870_irnt		MT:6253:T:C	Affx-92047851	0.0018085	-0.010465	0.020389	0.60775	30870_irnt		MT:6253:T:C	Affx-92047851	0.0018085	-0.010465	0.020389	NA	0.60775	30870_irnt
MT:6253:T:C	Affx-92047851	0.0018085	-0.0053085	0.026279	0.83991	3148_irnt		MT:6253:T:C	Affx-92047851	0.0018085	-0.0053209	0.02628	0.83955	3148_irnt		MT:6253:T:C	Affx-92047851	0.0018085	-0.0053209	0.02628	NA	0.83955	3148_irnt
MT:6253:T:C	Affx-92047851	0.0018085	0.0025963	0.021129	0.9022	4079_irnt		MT:6253:T:C	Affx-92047851	0.0018085	0.0026025	0.021129	0.90197	4079_irnt		MT:6253:T:C	Affx-92047851	0.0018085	0.0026025	0.021129	NA	0.90197	4079_irnt
MT:6253:T:C	Affx-92047851	0.0018085	-0.0098424	0.020007	0.62275	4080_irnt		MT:6253:T:C	Affx-92047851	0.0018085	-0.0098224	0.020008	0.62348	4080_irnt		MT:6253:T:C	Affx-92047851	0.0018085	-0.0098224	0.020008	NA	0.62348	4080_irnt
MT:6253:T:C	Affx-92047851	0.0018085	-0.0056882	0.0043139	0.18731	C3_SKIN		MT:6253:T:C	Affx-92047851	0.0018085	-0.0056895	0.0043139	0.18721	C3_SKIN		MT:6253:T:C	Affx-92047851	0.0018085	-0.13993	NA	1.6573	0.19797	C3_SKIN
MT:6253:T:C	Affx-92047851	0.0018085	-0.0045007	0.0047434	0.34271	I9_IHD		MT:6253:T:C	Affx-92047851	0.0018085	-0.0044927	0.0047443	0.34366	I9_IHD		MT:6253:T:C	Affx-92047851	0.0018085	-0.088262	NA	0.82247	0.36446	I9_IHD
MT:6253:T:C	Affx-92047851	0.0018085	-0.0046282	0.0038902	0.23417	K57		MT:6253:T:C	Affx-92047851	0.0018085	-0.0046256	0.0038903	0.23444	K57		MT:6253:T:C	Affx-92047851	0.0018085	-0.13545	NA	1.2882	0.25638	K57
MT:6371:C:T	Affx-89025742	0.014136	-0.0027162	0.0030024	0.36563	20002_1065		MT:6371:C:T	Affx-89025742	0.014136	-0.0027089	0.0030027	0.36698	20002_1065		MT:6371:C:T	Affx-89025742	0.014136	-0.015275	NA	0.83354	0.36125	20002_1065
MT:6371:C:T	Affx-89025742	0.014136	0.00056721	0.0012163	0.64098	20002_1074		MT:6371:C:T	Affx-89025742	0.014136	0.00056886	0.0012165	0.64005	20002_1074		MT:6371:C:T	Affx-89025742	0.014136	0.019057	NA	0.21765	0.64084	20002_1074
MT:6371:C:T	Affx-89025742	0.014136	-2.5773e-05	0.0019202	0.98929	20002_1465		MT:6371:C:T	Affx-89025742	0.014136	-2.1605e-05	0.0019203	0.99102	20002_1465		MT:6371:C:T	Affx-89025742	0.014136	-0.0003949	NA	0.0002313	0.98787	20002_1465
MT:6371:C:T	Affx-89025742	0.014136	0.0039288	0.0022499	0.080782	20002_1473		MT:6371:C:T	Affx-89025742	0.014136	0.0039364	0.0022503	0.080236	20002_1473		MT:6371:C:T	Affx-89025742	0.014136	0.038333	NA	3.0579	0.080348	20002_1473
MT:6371:C:T	Affx-89025742	0.014136	-0.0029846	0.0014992	0.046498	2443		MT:6371:C:T	Affx-89025742	0.014136	-0.0029794	0.0014996	0.046943	2443		MT:6371:C:T	Affx-89025742	0.014136	-0.070517	NA	4.0787	0.043428	2443
MT:6371:C:T	Affx-89025742	0.014136	0.00805	0.0068461	0.23966	30650_irnt		MT:6371:C:T	Affx-89025742	0.014136	0.0080416	0.0068461	0.24015	30650_irnt		MT:6371:C:T	Affx-89025742	0.014136	0.0080416	0.0068461	NA	0.24015	30650_irnt
MT:6371:C:T	Affx-89025742	0.014136	-0.0057823	0.0058053	0.31923	30700_irnt		MT:6371:C:T	Affx-89025742	0.014136	-0.0058041	0.0058055	0.31743	30700_irnt		MT:6371:C:T	Affx-89025742	0.014136	-0.0058041	0.0058055	NA	0.31743	30700_irnt
MT:6371:C:T	Affx-89025742	0.014136	-0.0076595	0.0074403	0.30326	30740_irnt		MT:6371:C:T	Affx-89025742	0.014136	-0.007648	0.0074404	0.304	30740_irnt		MT:6371:C:T	Affx-89025742	0.014136	-0.007648	0.0074404	NA	0.304	30740_irnt
MT:6371:C:T	Affx-89025742	0.014136	-0.011202	0.0068096	0.099954	30760_irnt		MT:6371:C:T	Affx-89025742	0.014136	-0.011255	0.0068126	0.098506	30760_irnt		MT:6371:C:T	Affx-89025742	0.014136	-0.011255	0.0068126	NA	0.098506	30760_irnt
MT:6371:C:T	Affx-89025742	0.014136	-0.0040601	0.0070533	0.56486	30780_irnt		MT:6371:C:T	Affx-89025742	0.014136	-0.0040641	0.0070533	0.56448	30780_irnt		MT:6371:C:T	Affx-89025742	0.014136	-0.0040641	0.0070533	NA	0.56448	30780_irnt
MT:6371:C:T	Affx-89025742	0.014136	-0.0025294	0.0069474	0.71579	30870_irnt		MT:6371:C:T	Affx-89025742	0.014136	-0.002445	0.006951	0.72503	30870_irnt		MT:6371:C:T	Affx-89025742	0.014136	-0.002445	0.006951	NA	0.72503	30870_irnt
MT:6371:C:T	Affx-89025742	0.014136	-0.0085788	0.0089436	0.33745	3148_irnt		MT:6371:C:T	Affx-89025742	0.014136	-0.0085503	0.008944	0.33908	3148_irnt		MT:6371:C:T	Affx-89025742	0.014136	-0.0085503	0.008944	NA	0.33908	3148_irnt
MT:6371:C:T	Affx-89025742	0.014136	0.0014649	0.001945	0.45134	3393		MT:6371:C:T	Affx-89025742	0.014136	0.0014591	0.001945	0.45314	3393		MT:6371:C:T	Affx-89025742	0.014136	0.031737	NA	0.5925	0.44146	3393
MT:6371:C:T	Affx-89025742	0.014136	-0.0029079	0.0071294	0.68337	4079_irnt		MT:6371:C:T	Affx-89025742	0.014136	-0.0029018	0.0071295	0.684	4079_irnt		MT:6371:C:T	Affx-89025742	0.014136	-0.0029018	0.0071295	NA	0.684	4079_irnt
MT:6371:C:T	Affx-89025742	0.014136	-0.00037332	0.0067508	0.9559	4080_irnt		MT:6371:C:T	Affx-89025742	0.014136	-0.00036691	0.0067513	0.95666	4080_irnt		MT:6371:C:T	Affx-89025742	0.014136	-0.00036691	0.0067513	NA	0.95666	4080_irnt
MT:6371:C:T	Affx-89025742	0.014136	-0.00021013	0.0014655	0.88599	C3_SKIN		MT:6371:C:T	Affx-89025742	0.014136	-0.00021102	0.0014655	0.88551	C3_SKIN		MT:6371:C:T	Affx-89025742	0.014136	-0.0042842	NA	0.015685	0.90033	C3_SKIN
MT:6371:C:T	Affx-89025742	0.014136	0.0012093	0.0012495	0.33312	H26		MT:6371:C:T	Affx-89025742	0.014136	0.0012097	0.0012495	0.33296	H26		MT:6371:C:T	Affx-89025742	0.014136	0.038888	NA	0.98746	0.32036	H26
MT:6371:C:T	Affx-89025742	0.014136	0.0027663	0.00095005	0.0035942	I48		MT:6371:C:T	Affx-89025742	0.014136	0.0027672	0.00095005	0.0035832	I48		MT:6371:C:T	Affx-89025742	0.014136	0.13941	NA	8.2128	0.0041596	I48
MT:6371:C:T	Affx-89025742	0.014136	-0.00088363	0.0011554	0.44439	I9_CHD		MT:6371:C:T	Affx-89025742	0.014136	-0.00087998	0.0011555	0.44633	I9_CHD		MT:6371:C:T	Affx-89025742	0.014136	-0.033736	NA	0.57561	0.44804	I9_CHD
MT:6371:C:T	Affx-89025742	0.014136	-0.0020322	0.0016115	0.20727	I9_IHD		MT:6371:C:T	Affx-89025742	0.014136	-0.002028	0.0016118	0.2083	I9_IHD		MT:6371:C:T	Affx-89025742	0.014136	-0.041192	NA	1.6655	0.19686	I9_IHD
MT:6371:C:T	Affx-89025742	0.014136	-0.0017221	0.0012297	0.16139	K21		MT:6371:C:T	Affx-89025742	0.014136	-0.0017205	0.0012297	0.16179	K21		MT:6371:C:T	Affx-89025742	0.014136	-0.058478	NA	1.9331	0.16442	K21
MT:6371:C:T	Affx-89025742	0.014136	-0.0013842	0.0010662	0.19419	K44		MT:6371:C:T	Affx-89025742	0.014136	-0.001383	0.0010662	0.19459	K44		MT:6371:C:T	Affx-89025742	0.014136	-0.062701	NA	1.6603	0.19757	K44
MT:6371:C:T	Affx-89025742	0.014136	0.00017608	0.0013216	0.89401	K57		MT:6371:C:T	Affx-89025742	0.014136	0.00017805	0.0013216	0.89283	K57		MT:6371:C:T	Affx-89025742	0.014136	0.0060877	NA	0.02612	0.87161	K57
MT:6455:C:T	Affx-86887358	0.0025233	0.0017606	0.0070656	0.80323	20002_1065		MT:6455:C:T	Affx-86887358	0.0025233	0.0015594	0.0070664	0.82534	20002_1065		MT:6455:C:T	Affx-86887358	0.0025233	0.0087574	NA	0.050845	0.8216	20002_1065
MT:6455:C:T	Affx-86887358	0.0025233	-0.0029341	0.0028624	0.30534	20002_1074		MT:6455:C:T	Affx-86887358	0.0025233	-0.0030111	0.0028628	0.29289	20002_1074		MT:6455:C:T	Affx-86887358	0.0025233	-0.10337	NA	1.0157	0.31354	20002_1074
MT:6455:C:T	Affx-86887358	0.0025233	-0.003928	0.0045189	0.38472	20002_1465		MT:6455:C:T	Affx-86887358	0.0025233	-0.0040244	0.0045192	0.37319	20002_1465		MT:6455:C:T	Affx-86887358	0.0025233	-0.054256	NA	0.76515	0.38172	20002_1465
MT:6455:C:T	Affx-86887358	0.0025233	0.0060197	0.0052948	0.25559	20002_1473		MT:6455:C:T	Affx-86887358	0.0025233	0.0058421	0.0052956	0.26994	20002_1473		MT:6455:C:T	Affx-86887358	0.0025233	0.056269	NA	1.2289	0.26763	20002_1473
MT:6455:C:T	Affx-86887358	0.0025233	-0.001072	0.003532	0.76151	2443		MT:6455:C:T	Affx-86887358	0.0025233	-0.0012376	0.003533	0.72611	2443		MT:6455:C:T	Affx-86887358	0.0025233	-0.022842	NA	0.082404	0.77407	2443
MT:6455:C:T	Affx-86887358	0.0025233	0.028266	0.016083	0.078831	30650_irnt		MT:6455:C:T	Affx-86887358	0.0025233	0.028325	0.016083	0.078206	30650_irnt		MT:6455:C:T	Affx-86887358	0.0025233	0.028325	0.016083	NA	0.078206	30650_irnt
MT:6455:C:T	Affx-86887358	0.0025233	-0.012948	0.013641	0.34252	30700_irnt		MT:6455:C:T	Affx-86887358	0.0025233	-0.012765	0.013642	0.34943	30700_irnt		MT:6455:C:T	Affx-86887358	0.0025233	-0.012765	0.013642	NA	0.34943	30700_irnt
MT:6455:C:T	Affx-86887358	0.0025233	0.014645	0.017568	0.4045	30740_irnt		MT:6455:C:T	Affx-86887358	0.0025233	0.01442	0.017568	0.41176	30740_irnt		MT:6455:C:T	Affx-86887358	0.0025233	0.01442	0.017568	NA	0.41176	30740_irnt
MT:6455:C:T	Affx-86887358	0.0025233	-0.012204	0.016086	0.44805	30760_irnt		MT:6455:C:T	Affx-86887358	0.0025233	-0.011325	0.016093	0.48161	30760_irnt		MT:6455:C:T	Affx-86887358	0.0025233	-0.011325	0.016093	NA	0.48161	30760_irnt
MT:6455:C:T	Affx-86887358	0.0025233	0.025103	0.016583	0.13007	30780_irnt		MT:6455:C:T	Affx-86887358	0.0025233	0.025175	0.016583	0.12897	30780_irnt		MT:6455:C:T	Affx-86887358	0.0025233	0.025175	0.016583	NA	0.12897	30780_irnt
MT:6455:C:T	Affx-86887358	0.0025233	0.025391	0.016329	0.11996	30870_irnt		MT:6455:C:T	Affx-86887358	0.0025233	0.024535	0.016338	0.13316	30870_irnt		MT:6455:C:T	Affx-86887358	0.0025233	0.024535	0.016338	NA	0.13316	30870_irnt
MT:6455:C:T	Affx-86887358	0.0025233	0.020043	0.021358	0.34803	3148_irnt		MT:6455:C:T	Affx-86887358	0.0025233	0.020369	0.021359	0.34027	3148_irnt		MT:6455:C:T	Affx-86887358	0.0025233	0.020369	0.021359	NA	0.34027	3148_irnt
MT:6455:C:T	Affx-86887358	0.0025233	0.0020752	0.0046019	0.65202	3393		MT:6455:C:T	Affx-86887358	0.0025233	0.0021073	0.0046018	0.64701	3393		MT:6455:C:T	Affx-86887358	0.0025233	0.051397	NA	0.27862	0.59761	3393
MT:6455:C:T	Affx-86887358	0.0025233	0.0034915	0.016669	0.83409	4079_irnt		MT:6455:C:T	Affx-86887358	0.0025233	0.0033632	0.016669	0.8401	4079_irnt		MT:6455:C:T	Affx-86887358	0.0025233	0.0033632	0.016669	NA	0.8401	4079_irnt
MT:6455:C:T	Affx-86887358	0.0025233	-0.007611	0.015784	0.62966	4080_irnt		MT:6455:C:T	Affx-86887358	0.0025233	-0.0079388	0.015785	0.61501	4080_irnt		MT:6455:C:T	Affx-86887358	0.0025233	-0.0079388	0.015785	NA	0.61501	4080_irnt
MT:6455:C:T	Affx-86887358	0.0025233	0.0052659	0.0034489	0.1268	C3_SKIN		MT:6455:C:T	Affx-86887358	0.0025233	0.0052879	0.0034489	0.12522	C3_SKIN		MT:6455:C:T	Affx-86887358	0.0025233	0.11654	NA	2.4241	0.11948	C3_SKIN
MT:6455:C:T	Affx-86887358	0.0025233	-0.0035898	0.0029405	0.22215	H26		MT:6455:C:T	Affx-86887358	0.0025233	-0.0035984	0.0029404	0.22104	H26		MT:6455:C:T	Affx-86887358	0.0025233	-0.11784	NA	1.3389	0.24723	H26
MT:6455:C:T	Affx-86887358	0.0025233	-0.0033704	0.002719	0.21513	I9_CHD		MT:6455:C:T	Affx-86887358	0.0025233	-0.0034538	0.0027193	0.20405	I9_CHD		MT:6455:C:T	Affx-86887358	0.0025233	-0.13695	NA	1.5309	0.21597	I9_CHD
MT:6455:C:T	Affx-86887358	0.0025233	-0.0031469	0.0037923	0.40665	I9_IHD		MT:6455:C:T	Affx-86887358	0.0025233	-0.0032806	0.003793	0.38709	I9_IHD		MT:6455:C:T	Affx-86887358	0.0025233	-0.06268	NA	0.68859	0.40665	I9_IHD
MT:6455:C:T	Affx-86887358	0.0025233	-0.0020739	0.0028938	0.47358	K21		MT:6455:C:T	Affx-86887358	0.0025233	-0.0021092	0.0028939	0.4661	K21		MT:6455:C:T	Affx-86887358	0.0025233	-0.064155	NA	0.42281	0.51554	K21
MT:6455:C:T	Affx-86887358	0.0025233	-0.0014008	0.0025091	0.57663	K44		MT:6455:C:T	Affx-86887358	0.0025233	-0.0014288	0.0025091	0.56905	K44		MT:6455:C:T	Affx-86887358	0.0025233	-0.052107	NA	0.21298	0.64444	K44
MT:6455:C:T	Affx-86887358	0.0025233	-0.0041506	0.0031102	0.18204	K57		MT:6455:C:T	Affx-86887358	0.0025233	-0.0041954	0.0031103	0.17737	K57		MT:6455:C:T	Affx-86887358	0.0025233	-0.1238	NA	1.6863	0.19409	K57
MT:6528:C:T	Affx-89025708	0.0061345	-0.0021561	0.0045378	0.63468	20002_1065		MT:6528:C:T	Affx-89025708	0.0061345	-0.0022023	0.0045383	0.62749	20002_1065		MT:6528:C:T	Affx-89025708	0.0061345	-0.012045	NA	0.23263	0.62958	20002_1065
MT:6528:C:T	Affx-89025708	0.0061345	-0.00085395	0.0018383	0.64227	20002_1074		MT:6528:C:T	Affx-89025708	0.0061345	-0.00087286	0.0018386	0.63497	20002_1074		MT:6528:C:T	Affx-89025708	0.0061345	-0.027738	NA	0.20113	0.65381	20002_1074
MT:6528:C:T	Affx-89025708	0.0061345	-0.0038607	0.0029022	0.18344	20002_1465		MT:6528:C:T	Affx-89025708	0.0061345	-0.003882	0.0029024	0.18105	20002_1465		MT:6528:C:T	Affx-89025708	0.0061345	-0.052931	NA	1.7547	0.18528	20002_1465
MT:6528:C:T	Affx-89025708	0.0061345	0.0042744	0.0034005	0.20876	20002_1473		MT:6528:C:T	Affx-89025708	0.0061345	0.004235	0.003401	0.21306	20002_1473		MT:6528:C:T	Affx-89025708	0.0061345	0.04027	NA	1.5255	0.21679	20002_1473
MT:6528:C:T	Affx-89025708	0.0061345	0.00011884	0.002268	0.95821	2443		MT:6528:C:T	Affx-89025708	0.0061345	8.4573e-05	0.0022687	0.97026	2443		MT:6528:C:T	Affx-89025708	0.0061345	0.0034442	NA	0.0047794	0.94488	2443
MT:6528:C:T	Affx-89025708	0.0061345	-0.0041455	0.010338	0.68842	30650_irnt		MT:6528:C:T	Affx-89025708	0.0061345	-0.0041287	0.010338	0.68962	30650_irnt		MT:6528:C:T	Affx-89025708	0.0061345	-0.0041287	0.010338	NA	0.68962	30650_irnt
MT:6528:C:T	Affx-89025708	0.0061345	-0.00503	0.0087489	0.56534	30700_irnt		MT:6528:C:T	Affx-89025708	0.0061345	-0.0049665	0.0087491	0.57027	30700_irnt		MT:6528:C:T	Affx-89025708	0.0061345	-0.0049665	0.0087491	NA	0.57027	30700_irnt
MT:6528:C:T	Affx-89025708	0.0061345	0.013515	0.011191	0.22719	30740_irnt		MT:6528:C:T	Affx-89025708	0.0061345	0.013448	0.011192	0.2295	30740_irnt		MT:6528:C:T	Affx-89025708	0.0061345	0.013448	0.011192	NA	0.2295	30740_irnt
MT:6528:C:T	Affx-89025708	0.0061345	-0.014238	0.01024	0.16437	30760_irnt		MT:6528:C:T	Affx-89025708	0.0061345	-0.013975	0.010244	0.17249	30760_irnt		MT:6528:C:T	Affx-89025708	0.0061345	-0.013975	0.010244	NA	0.17249	30760_irnt
MT:6528:C:T	Affx-89025708	0.0061345	-0.0015782	0.010633	0.88201	30780_irnt		MT:6528:C:T	Affx-89025708	0.0061345	-0.0015524	0.010633	0.88392	30780_irnt		MT:6528:C:T	Affx-89025708	0.0061345	-0.0015524	0.010633	NA	0.88392	30780_irnt
MT:6528:C:T	Affx-89025708	0.0061345	0.018247	0.010467	0.081283	30870_irnt		MT:6528:C:T	Affx-89025708	0.0061345	0.01795	0.010472	0.086511	30870_irnt		MT:6528:C:T	Affx-89025708	0.0061345	0.01795	0.010472	NA	0.086511	30870_irnt
MT:6528:C:T	Affx-89025708	0.0061345	-0.016557	0.013734	0.228	3148_irnt		MT:6528:C:T	Affx-89025708	0.0061345	-0.016541	0.013735	0.22848	3148_irnt		MT:6528:C:T	Affx-89025708	0.0061345	-0.016541	0.013735	NA	0.22848	3148_irnt
MT:6528:C:T	Affx-89025708	0.0061345	0.0027659	0.0029069	0.34135	3393		MT:6528:C:T	Affx-89025708	0.0061345	0.0027671	0.0029069	0.34114	3393		MT:6528:C:T	Affx-89025708	0.0061345	0.059577	NA	0.98341	0.32136	3393
MT:6528:C:T	Affx-89025708	0.0061345	0.016385	0.010814	0.12974	4079_irnt		MT:6528:C:T	Affx-89025708	0.0061345	0.016364	0.010814	0.13023	4079_irnt		MT:6528:C:T	Affx-89025708	0.0061345	0.016364	0.010814	NA	0.13023	4079_irnt
MT:6528:C:T	Affx-89025708	0.0061345	0.019806	0.01024	0.053088	4080_irnt		MT:6528:C:T	Affx-89025708	0.0061345	0.019743	0.010241	0.053865	4080_irnt		MT:6528:C:T	Affx-89025708	0.0061345	0.019743	0.010241	NA	0.053865	4080_irnt
MT:6528:C:T	Affx-89025708	0.0061345	-0.0027319	0.002215	0.21744	C3_SKIN		MT:6528:C:T	Affx-89025708	0.0061345	-0.002727	0.002215	0.21827	C3_SKIN		MT:6528:C:T	Affx-89025708	0.0061345	-0.06291	NA	1.416	0.23406	C3_SKIN
MT:6528:C:T	Affx-89025708	0.0061345	-0.00010521	0.0018885	0.95557	H26		MT:6528:C:T	Affx-89025708	0.0061345	-0.00010712	0.0018885	0.95477	H26		MT:6528:C:T	Affx-89025708	0.0061345	0.00216	NA	0.0012871	0.97138	H26
MT:6528:C:T	Affx-89025708	0.0061345	-4.6191e-05	0.0014359	0.97434	I48		MT:6528:C:T	Affx-89025708	0.0061345	-5.0857e-05	0.0014359	0.97175	I48		MT:6528:C:T	Affx-89025708	0.0061345	0.0026729	NA	0.0011677	0.97274	I48
MT:6528:C:T	Affx-89025708	0.0061345	0.0010106	0.0017462	0.56277	I9_CHD		MT:6528:C:T	Affx-89025708	0.0061345	0.00099208	0.0017464	0.56999	I9_CHD		MT:6528:C:T	Affx-89025708	0.0061345	0.037541	NA	0.36035	0.54831	I9_CHD
MT:6528:C:T	Affx-89025708	0.0061345	-0.00086347	0.0024356	0.72295	I9_IHD		MT:6528:C:T	Affx-89025708	0.0061345	-0.00089489	0.002436	0.71335	I9_IHD		MT:6528:C:T	Affx-89025708	0.0061345	-0.016297	NA	0.12353	0.72524	I9_IHD
MT:6528:C:T	Affx-89025708	0.0061345	-0.0017593	0.0018585	0.34383	K21		MT:6528:C:T	Affx-89025708	0.0061345	-0.0017671	0.0018586	0.34171	K21		MT:6528:C:T	Affx-89025708	0.0061345	-0.057525	NA	0.82676	0.36321	K21
MT:6528:C:T	Affx-89025708	0.0061345	0.0003109	0.0016114	0.84701	K44		MT:6528:C:T	Affx-89025708	0.0061345	0.00030471	0.0016114	0.85002	K44		MT:6528:C:T	Affx-89025708	0.0061345	0.018823	NA	0.072272	0.78806	K44
MT:6528:C:T	Affx-89025708	0.0061345	-0.00030661	0.0019975	0.87801	K57		MT:6528:C:T	Affx-89025708	0.0061345	-0.00031654	0.0019975	0.87409	K57		MT:6528:C:T	Affx-89025708	0.0061345	-0.0059458	NA	0.010954	0.91665	K57
MT:6734:G:A	Affx-34462179	0.010608	0.00016739	0.0034657	0.96148	20002_1065		MT:6734:G:A	Affx-34462179	0.010608	0.00014176	0.003466	0.96738	20002_1065		MT:6734:G:A	Affx-34462179	0.010608	0.00099574	NA	0.002688	0.95865	20002_1065
MT:6734:G:A	Affx-34462179	0.010608	-0.0018928	0.001404	0.1776	20002_1074		MT:6734:G:A	Affx-34462179	0.010608	-0.0019033	0.0014042	0.17529	20002_1074		MT:6734:G:A	Affx-34462179	0.010608	-0.065982	NA	1.7751	0.18275	20002_1074
MT:6734:G:A	Affx-34462179	0.010608	-0.0020834	0.0022165	0.34725	20002_1465		MT:6734:G:A	Affx-34462179	0.010608	-0.0020953	0.0022166	0.34452	20002_1465		MT:6734:G:A	Affx-34462179	0.010608	-0.029007	NA	0.89885	0.34309	20002_1465
MT:6734:G:A	Affx-34462179	0.010608	-0.0010688	0.0025971	0.68069	20002_1473		MT:6734:G:A	Affx-34462179	0.010608	-0.0010908	0.0025975	0.67453	20002_1473		MT:6734:G:A	Affx-34462179	0.010608	-0.010392	NA	0.16228	0.68706	20002_1473
MT:6734:G:A	Affx-34462179	0.010608	0.0027874	0.001732	0.10754	2443		MT:6734:G:A	Affx-34462179	0.010608	0.0027653	0.0017325	0.11045	2443		MT:6734:G:A	Affx-34462179	0.010608	0.060153	NA	2.6042	0.10658	2443
MT:6734:G:A	Affx-34462179	0.010608	0.039711	0.0079122	5.1987e-07	30650_irnt		MT:6734:G:A	Affx-34462179	0.010608	0.039721	0.0079121	5.1617e-07	30650_irnt		MT:6734:G:A	Affx-34462179	0.010608	0.039721	0.0079121	NA	5.1617e-07	30650_irnt
MT:6734:G:A	Affx-34462179	0.010608	-0.022215	0.0067039	0.00092057	30700_irnt		MT:6734:G:A	Affx-34462179	0.010608	-0.022184	0.0067041	0.00093653	30700_irnt		MT:6734:G:A	Affx-34462179	0.010608	-0.022184	0.0067041	NA	0.00093653	30700_irnt
MT:6734:G:A	Affx-34462179	0.010608	-0.0089728	0.0086004	0.29681	30740_irnt		MT:6734:G:A	Affx-34462179	0.010608	-0.0089947	0.0086006	0.29564	30740_irnt		MT:6734:G:A	Affx-34462179	0.010608	-0.0089947	0.0086006	NA	0.29564	30740_irnt
MT:6734:G:A	Affx-34462179	0.010608	0.0036512	0.0078713	0.64275	30760_irnt		MT:6734:G:A	Affx-34462179	0.010608	0.0037387	0.0078748	0.63495	30760_irnt		MT:6734:G:A	Affx-34462179	0.010608	0.0037387	0.0078748	NA	0.63495	30760_irnt
MT:6734:G:A	Affx-34462179	0.010608	-0.0019731	0.0081457	0.80861	30780_irnt		MT:6734:G:A	Affx-34462179	0.010608	-0.0019605	0.0081457	0.80981	30780_irnt		MT:6734:G:A	Affx-34462179	0.010608	-0.0019605	0.0081457	NA	0.80981	30780_irnt
MT:6734:G:A	Affx-34462179	0.010608	0.00077455	0.0080214	0.92308	30870_irnt		MT:6734:G:A	Affx-34462179	0.010608	0.00062845	0.0080256	0.93759	30870_irnt		MT:6734:G:A	Affx-34462179	0.010608	0.00062845	0.0080256	NA	0.93759	30870_irnt
MT:6734:G:A	Affx-34462179	0.010608	-0.0015486	0.010288	0.88035	3148_irnt		MT:6734:G:A	Affx-34462179	0.010608	-0.0015434	0.010288	0.88075	3148_irnt		MT:6734:G:A	Affx-34462179	0.010608	-0.0015434	0.010288	NA	0.88075	3148_irnt
MT:6734:G:A	Affx-34462179	0.010608	-0.0019335	0.0022691	0.39417	3393		MT:6734:G:A	Affx-34462179	0.010608	-0.0019227	0.0022691	0.39681	3393		MT:6734:G:A	Affx-34462179	0.010608	-0.041308	NA	0.67366	0.41178	3393
MT:6734:G:A	Affx-34462179	0.010608	-0.0022249	0.0082575	0.78759	4079_irnt		MT:6734:G:A	Affx-34462179	0.010608	-0.0022578	0.0082576	0.78453	4079_irnt		MT:6734:G:A	Affx-34462179	0.010608	-0.0022578	0.0082576	NA	0.78453	4079_irnt
MT:6734:G:A	Affx-34462179	0.010608	-0.0097534	0.0078189	0.21225	4080_irnt		MT:6734:G:A	Affx-34462179	0.010608	-0.0098408	0.0078195	0.20821	4080_irnt		MT:6734:G:A	Affx-34462179	0.010608	-0.0098408	0.0078195	NA	0.20821	4080_irnt
MT:6734:G:A	Affx-34462179	0.010608	0.0011371	0.0016917	0.50145	C3_SKIN		MT:6734:G:A	Affx-34462179	0.010608	0.0011399	0.0016917	0.50042	C3_SKIN		MT:6734:G:A	Affx-34462179	0.010608	0.02693	NA	0.48786	0.48488	C3_SKIN
MT:6734:G:A	Affx-34462179	0.010608	8.3039e-05	0.0014423	0.95409	H26		MT:6734:G:A	Affx-34462179	0.010608	8.1977e-05	0.0014423	0.95467	H26		MT:6734:G:A	Affx-34462179	0.010608	0.0052873	NA	0.013511	0.90747	H26
MT:6734:G:A	Affx-34462179	0.010608	-0.001561	0.0010966	0.15461	I48		MT:6734:G:A	Affx-34462179	0.010608	-0.0015636	0.0010967	0.15393	I48		MT:6734:G:A	Affx-34462179	0.010608	-0.089316	NA	1.965	0.16098	I48
MT:6734:G:A	Affx-34462179	0.010608	0.0022128	0.0013336	0.097064	I9_CHD		MT:6734:G:A	Affx-34462179	0.010608	0.0022025	0.0013338	0.098672	I9_CHD		MT:6734:G:A	Affx-34462179	0.010608	0.079915	NA	2.8029	0.094095	I9_CHD
MT:6734:G:A	Affx-34462179	0.010608	0.00017296	0.0018601	0.92592	I9_IHD		MT:6734:G:A	Affx-34462179	0.010608	0.00015561	0.0018605	0.93334	I9_IHD		MT:6734:G:A	Affx-34462179	0.010608	0.0047089	NA	0.017358	0.89518	I9_IHD
MT:6734:G:A	Affx-34462179	0.010608	0.00068102	0.0014194	0.63138	K21		MT:6734:G:A	Affx-34462179	0.010608	0.00067669	0.0014194	0.63356	K21		MT:6734:G:A	Affx-34462179	0.010608	0.023924	NA	0.26751	0.60501	K21
MT:6734:G:A	Affx-34462179	0.010608	-0.00053674	0.0012307	0.66274	K44		MT:6734:G:A	Affx-34462179	0.010608	-0.00054018	0.0012307	0.66072	K44		MT:6734:G:A	Affx-34462179	0.010608	-0.021007	NA	0.14869	0.6998	K44
MT:6734:G:A	Affx-34462179	0.010608	-0.00034919	0.0015255	0.81895	K57		MT:6734:G:A	Affx-34462179	0.010608	-0.00035472	0.0015256	0.81614	K57		MT:6734:G:A	Affx-34462179	0.010608	-0.0085206	NA	0.037767	0.84591	K57
MT:6752:A:G	Affx-34462180	0.0020583	-0.0098625	0.0078154	0.20697	20002_1065		MT:6752:A:G	Affx-34462180	0.0020583	-0.0097019	0.0078162	0.21451	20002_1065		MT:6752:A:G	Affx-34462180	0.0020583	-0.055178	NA	1.5629	0.21124	20002_1065
MT:6752:A:G	Affx-34462180	0.0020583	0.0041532	0.0031662	0.18961	20002_1074		MT:6752:A:G	Affx-34462180	0.0020583	0.0042124	0.0031666	0.18343	20002_1074		MT:6752:A:G	Affx-34462180	0.0020583	0.13505	NA	1.8438	0.1745	20002_1074
MT:6752:A:G	Affx-34462180	0.0020583	0.0067406	0.0049985	0.17749	20002_1465		MT:6752:A:G	Affx-34462180	0.0020583	0.0068187	0.0049988	0.17254	20002_1465		MT:6752:A:G	Affx-34462180	0.0020583	0.086473	NA	1.7975	0.18001	20002_1465
MT:6752:A:G	Affx-34462180	0.0020583	0.0010305	0.0058567	0.86033	20002_1473		MT:6752:A:G	Affx-34462180	0.0020583	0.0011745	0.0058576	0.84108	20002_1473		MT:6752:A:G	Affx-34462180	0.0020583	0.013132	NA	0.051982	0.81965	20002_1473
MT:6752:A:G	Affx-34462180	0.0020583	0.0040021	0.0039061	0.30557	2443		MT:6752:A:G	Affx-34462180	0.0020583	0.0041323	0.0039072	0.29024	2443		MT:6752:A:G	Affx-34462180	0.0020583	0.0918	NA	1.229	0.2676	2443
MT:6752:A:G	Affx-34462180	0.0020583	-0.018657	0.017731	0.29271	30650_irnt		MT:6752:A:G	Affx-34462180	0.0020583	-0.018698	0.017731	0.29164	30650_irnt		MT:6752:A:G	Affx-34462180	0.0020583	-0.018698	0.017731	NA	0.29164	30650_irnt
MT:6752:A:G	Affx-34462180	0.0020583	0.0081807	0.015017	0.58591	30700_irnt		MT:6752:A:G	Affx-34462180	0.0020583	0.008054	0.015017	0.59174	30700_irnt		MT:6752:A:G	Affx-34462180	0.0020583	0.008054	0.015017	NA	0.59174	30700_irnt
MT:6752:A:G	Affx-34462180	0.0020583	0.010745	0.019207	0.57587	30740_irnt		MT:6752:A:G	Affx-34462180	0.0020583	0.010891	0.019207	0.57071	30740_irnt		MT:6752:A:G	Affx-34462180	0.0020583	0.010891	0.019207	NA	0.57071	30740_irnt
MT:6752:A:G	Affx-34462180	0.0020583	-0.019133	0.017587	0.27663	30760_irnt		MT:6752:A:G	Affx-34462180	0.0020583	-0.019706	0.017595	0.26272	30760_irnt		MT:6752:A:G	Affx-34462180	0.0020583	-0.019706	0.017595	NA	0.26272	30760_irnt
MT:6752:A:G	Affx-34462180	0.0020583	-0.037459	0.018246	0.040076	30780_irnt		MT:6752:A:G	Affx-34462180	0.0020583	-0.037507	0.018246	0.039822	30780_irnt		MT:6752:A:G	Affx-34462180	0.0020583	-0.037507	0.018246	NA	0.039822	30780_irnt
MT:6752:A:G	Affx-34462180	0.0020583	0.0089184	0.017965	0.6196	30870_irnt		MT:6752:A:G	Affx-34462180	0.0020583	0.0095127	0.017975	0.59665	30870_irnt		MT:6752:A:G	Affx-34462180	0.0020583	0.0095127	0.017975	NA	0.59665	30870_irnt
MT:6752:A:G	Affx-34462180	0.0020583	-0.029624	0.024343	0.22363	3148_irnt		MT:6752:A:G	Affx-34462180	0.0020583	-0.030433	0.024313	0.21068	3148_irnt		MT:6752:A:G	Affx-34462180	0.0020583	-0.030433	0.024313	NA	0.21068	3148_irnt
MT:6752:A:G	Affx-34462180	0.0020583	-0.0031973	0.004912	0.51511	3393		MT:6752:A:G	Affx-34462180	0.0020583	-0.0032098	0.004912	0.51346	3393		MT:6752:A:G	Affx-34462180	0.0020583	-0.067048	NA	0.3578	0.54973	3393
MT:6752:A:G	Affx-34462180	0.0020583	-0.023586	0.01841	0.20014	4079_irnt		MT:6752:A:G	Affx-34462180	0.0020583	-0.023481	0.01841	0.20216	4079_irnt		MT:6752:A:G	Affx-34462180	0.0020583	-0.023481	0.01841	NA	0.20216	4079_irnt
MT:6752:A:G	Affx-34462180	0.0020583	-0.031098	0.017432	0.074439	4080_irnt		MT:6752:A:G	Affx-34462180	0.0020583	-0.030846	0.017434	0.076833	4080_irnt		MT:6752:A:G	Affx-34462180	0.0020583	-0.030846	0.017434	NA	0.076833	4080_irnt
MT:6752:A:G	Affx-34462180	0.0020583	0.0041927	0.0038149	0.27175	C3_SKIN		MT:6752:A:G	Affx-34462180	0.0020583	0.004175	0.0038149	0.27378	C3_SKIN		MT:6752:A:G	Affx-34462180	0.0020583	0.097428	NA	1.3185	0.25086	C3_SKIN
MT:6752:A:G	Affx-34462180	0.0020583	-0.0032043	0.0032525	0.32454	H26		MT:6752:A:G	Affx-34462180	0.0020583	-0.0031972	0.0032525	0.32561	H26		MT:6752:A:G	Affx-34462180	0.0020583	-0.10387	NA	0.85413	0.35539	H26
MT:6752:A:G	Affx-34462180	0.0020583	0.0024186	0.0030075	0.42129	I9_CHD		MT:6752:A:G	Affx-34462180	0.0020583	0.0024863	0.0030079	0.40847	I9_CHD		MT:6752:A:G	Affx-34462180	0.0020583	0.096774	NA	0.81595	0.36637	I9_CHD
MT:6752:A:G	Affx-34462180	0.0020583	0.0068932	0.0041948	0.10032	I9_IHD		MT:6752:A:G	Affx-34462180	0.0020583	0.0069985	0.0041955	0.095298	I9_IHD		MT:6752:A:G	Affx-34462180	0.0020583	0.12794	NA	2.8298	0.092532	I9_IHD
MT:6752:A:G	Affx-34462180	0.0020583	0.0032751	0.0032009	0.30623	K21		MT:6752:A:G	Affx-34462180	0.0020583	0.0033038	0.003201	0.30201	K21		MT:6752:A:G	Affx-34462180	0.0020583	0.10747	NA	1.1799	0.27737	K21
MT:6752:A:G	Affx-34462180	0.0020583	-0.0016816	0.0034403	0.62497	K57		MT:6752:A:G	Affx-34462180	0.0020583	-0.0016452	0.0034403	0.6325	K57		MT:6752:A:G	Affx-34462180	0.0020583	-0.044127	NA	0.18713	0.66532	K57
MT:6776:T:C	Affx-34462182	0.053614	0.00064785	0.0015739	0.68061	20002_1065		MT:6776:T:C	Affx-34462182	0.053614	0.00064777	0.001574	0.68068	20002_1065		MT:6776:T:C	Affx-34462182	0.053614	0.0035986	NA	0.17155	0.67874	20002_1065
MT:6776:T:C	Affx-34462182	0.053614	0.00039213	0.0006376	0.53854	20002_1074		MT:6776:T:C	Affx-34462182	0.053614	0.00039105	0.00063768	0.53972	20002_1074		MT:6776:T:C	Affx-34462182	0.053614	0.011883	NA	0.31417	0.57513	20002_1074
MT:6776:T:C	Affx-34462182	0.053614	0.0010792	0.0010066	0.28368	20002_1465		MT:6776:T:C	Affx-34462182	0.053614	0.0010797	0.0010066	0.28347	20002_1465		MT:6776:T:C	Affx-34462182	0.053614	0.014745	NA	1.1949	0.27435	20002_1465
MT:6776:T:C	Affx-34462182	0.053614	0.00111	0.0011794	0.34665	20002_1473		MT:6776:T:C	Affx-34462182	0.053614	0.001111	0.0011796	0.34629	20002_1473		MT:6776:T:C	Affx-34462182	0.053614	0.010885	NA	0.89009	0.34545	20002_1473
MT:6776:T:C	Affx-34462182	0.053614	0.0007943	0.00078594	0.31219	2443		MT:6776:T:C	Affx-34462182	0.053614	0.00079454	0.00078617	0.31219	2443		MT:6776:T:C	Affx-34462182	0.053614	0.017282	NA	1.0031	0.31657	2443
MT:6776:T:C	Affx-34462182	0.053614	-0.0019826	0.0035938	0.58116	30650_irnt		MT:6776:T:C	Affx-34462182	0.053614	-0.0019825	0.0035938	0.5812	30650_irnt		MT:6776:T:C	Affx-34462182	0.053614	-0.0019825	0.0035938	NA	0.5812	30650_irnt
MT:6776:T:C	Affx-34462182	0.053614	0.0027734	0.003046	0.36255	30700_irnt		MT:6776:T:C	Affx-34462182	0.053614	0.0027774	0.0030461	0.36187	30700_irnt		MT:6776:T:C	Affx-34462182	0.053614	0.0027774	0.0030461	NA	0.36187	30700_irnt
MT:6776:T:C	Affx-34462182	0.053614	-0.0042999	0.0038984	0.27003	30740_irnt		MT:6776:T:C	Affx-34462182	0.053614	-0.0043153	0.0038985	0.26834	30740_irnt		MT:6776:T:C	Affx-34462182	0.053614	-0.0043153	0.0038985	NA	0.26834	30740_irnt
MT:6776:T:C	Affx-34462182	0.053614	0.0042073	0.0035688	0.23843	30760_irnt		MT:6776:T:C	Affx-34462182	0.053614	0.0042659	0.0035704	0.23217	30760_irnt		MT:6776:T:C	Affx-34462182	0.053614	0.0042659	0.0035704	NA	0.23217	30760_irnt
MT:6776:T:C	Affx-34462182	0.053614	-0.0022141	0.003701	0.54968	30780_irnt		MT:6776:T:C	Affx-34462182	0.053614	-0.0022114	0.003701	0.55017	30780_irnt		MT:6776:T:C	Affx-34462182	0.053614	-0.0022114	0.003701	NA	0.55017	30780_irnt
MT:6776:T:C	Affx-34462182	0.053614	-0.0025625	0.003645	0.48206	30870_irnt		MT:6776:T:C	Affx-34462182	0.053614	-0.0025756	0.003647	0.48005	30870_irnt		MT:6776:T:C	Affx-34462182	0.053614	-0.0025756	0.003647	NA	0.48005	30870_irnt
MT:6776:T:C	Affx-34462182	0.053614	0.0049812	0.0047114	0.29039	3148_irnt		MT:6776:T:C	Affx-34462182	0.053614	0.004898	0.0047116	0.29854	3148_irnt		MT:6776:T:C	Affx-34462182	0.053614	0.004898	0.0047116	NA	0.29854	3148_irnt
MT:6776:T:C	Affx-34462182	0.053614	7.3745e-05	0.0010245	0.94262	3393		MT:6776:T:C	Affx-34462182	0.053614	7.8332e-05	0.0010245	0.93905	3393		MT:6776:T:C	Affx-34462182	0.053614	0.0021623	NA	0.0096446	0.92177	3393
MT:6776:T:C	Affx-34462182	0.053614	-0.0013203	0.0037294	0.72331	4079_irnt		MT:6776:T:C	Affx-34462182	0.053614	-0.0013149	0.0037294	0.7244	4079_irnt		MT:6776:T:C	Affx-34462182	0.053614	-0.0013149	0.0037294	NA	0.7244	4079_irnt
MT:6776:T:C	Affx-34462182	0.053614	-0.00022279	0.0035313	0.94969	4080_irnt		MT:6776:T:C	Affx-34462182	0.053614	-0.00021736	0.0035316	0.95092	4080_irnt		MT:6776:T:C	Affx-34462182	0.053614	-0.00021736	0.0035316	NA	0.95092	4080_irnt
MT:6776:T:C	Affx-34462182	0.053614	-0.00029044	0.00076818	0.70536	C3_SKIN		MT:6776:T:C	Affx-34462182	0.053614	-0.00029049	0.00076818	0.70532	C3_SKIN		MT:6776:T:C	Affx-34462182	0.053614	-0.0065526	NA	0.13517	0.71313	C3_SKIN
MT:6776:T:C	Affx-34462182	0.053614	0.0007027	0.00065493	0.2833	H26		MT:6776:T:C	Affx-34462182	0.053614	0.00070276	0.00065493	0.28326	H26		MT:6776:T:C	Affx-34462182	0.053614	0.02212	NA	1.1546	0.28259	H26
MT:6776:T:C	Affx-34462182	0.053614	0.0005129	0.00049798	0.30303	I48		MT:6776:T:C	Affx-34462182	0.053614	0.00051302	0.00049799	0.30292	I48		MT:6776:T:C	Affx-34462182	0.053614	0.027906	NA	1.0701	0.30092	I48
MT:6776:T:C	Affx-34462182	0.053614	0.00015404	0.0006056	0.79922	I9_CHD		MT:6776:T:C	Affx-34462182	0.053614	0.00015447	0.00060567	0.79869	I9_CHD		MT:6776:T:C	Affx-34462182	0.053614	0.0056305	NA	0.062877	0.802	I9_CHD
MT:6776:T:C	Affx-34462182	0.053614	-0.00044479	0.00084467	0.59848	I9_IHD		MT:6776:T:C	Affx-34462182	0.053614	-0.00044556	0.00084483	0.59791	I9_IHD		MT:6776:T:C	Affx-34462182	0.053614	-0.0089517	NA	0.30491	0.58082	I9_IHD
MT:6776:T:C	Affx-34462182	0.053614	0.00094069	0.00064455	0.14444	K21		MT:6776:T:C	Affx-34462182	0.053614	0.00094093	0.00064456	0.14434	K21		MT:6776:T:C	Affx-34462182	0.053614	0.030302	NA	2.1202	0.14536	K21
MT:6776:T:C	Affx-34462182	0.053614	0.00065262	0.00055884	0.24289	K44		MT:6776:T:C	Affx-34462182	0.053614	0.00065279	0.00055885	0.24277	K44		MT:6776:T:C	Affx-34462182	0.053614	0.02802	NA	1.3711	0.24163	K44
MT:6776:T:C	Affx-34462182	0.053614	-0.00051106	0.00069274	0.46067	K57		MT:6776:T:C	Affx-34462182	0.053614	-0.00051081	0.00069275	0.4609	K57		MT:6776:T:C	Affx-34462182	0.053614	-0.014545	NA	0.53981	0.46251	K57
MT:7028:C:T	Affx-34462190	0.56206	-0.00016304	0.00071439	0.81947	20002_1065		MT:7028:C:T	Affx-34462190	0.56206	-0.00015852	0.00071447	0.82441	20002_1065		MT:7028:C:T	Affx-34462190	0.56206	-0.00083559	NA	0.044754	0.83246	20002_1065
MT:7028:C:T	Affx-34462190	0.56206	9.714e-05	0.00028941	0.73714	20002_1074		MT:7028:C:T	Affx-34462190	0.56206	0.00010057	0.00028945	0.72826	20002_1074		MT:7028:C:T	Affx-34462190	0.56206	0.0038801	NA	0.15813	0.69088	20002_1074
MT:7028:C:T	Affx-34462190	0.56206	-0.00083808	0.0004569	0.066617	20002_1465		MT:7028:C:T	Affx-34462190	0.56206	-0.00083682	0.00045693	0.067042	20002_1465		MT:7028:C:T	Affx-34462190	0.56206	-0.011243	NA	3.3164	0.068593	20002_1465
MT:7028:C:T	Affx-34462190	0.56206	-0.00044056	0.00053535	0.41055	20002_1473		MT:7028:C:T	Affx-34462190	0.56206	-0.00043825	0.00053543	0.41307	20002_1473		MT:7028:C:T	Affx-34462190	0.56206	-0.0041895	NA	0.63212	0.42658	20002_1473
MT:7028:C:T	Affx-34462190	0.56206	0.00011548	0.0003568	0.74621	2443		MT:7028:C:T	Affx-34462190	0.56206	0.00012013	0.00035691	0.73644	2443		MT:7028:C:T	Affx-34462190	0.56206	0.0028381	NA	0.12812	0.72039	2443
MT:7028:C:T	Affx-34462190	0.56206	0.0049972	0.0016313	0.0021887	30650_irnt		MT:7028:C:T	Affx-34462190	0.56206	0.004998	0.0016313	0.0021849	30650_irnt		MT:7028:C:T	Affx-34462190	0.56206	0.004998	0.0016313	NA	0.0021849	30650_irnt
MT:7028:C:T	Affx-34462190	0.56206	-0.0063055	0.0013822	5.067e-06	30700_irnt		MT:7028:C:T	Affx-34462190	0.56206	-0.0063087	0.0013822	5.0153e-06	30700_irnt		MT:7028:C:T	Affx-34462190	0.56206	-0.0063087	0.0013822	NA	5.0153e-06	30700_irnt
MT:7028:C:T	Affx-34462190	0.56206	0.0019951	0.0017728	0.26043	30740_irnt		MT:7028:C:T	Affx-34462190	0.56206	0.0019962	0.0017728	0.26016	30740_irnt		MT:7028:C:T	Affx-34462190	0.56206	0.0019962	0.0017728	NA	0.26016	30740_irnt
MT:7028:C:T	Affx-34462190	0.56206	-0.0010917	0.0016227	0.5011	30760_irnt		MT:7028:C:T	Affx-34462190	0.56206	-0.0011174	0.0016234	0.49125	30760_irnt		MT:7028:C:T	Affx-34462190	0.56206	-0.0011174	0.0016234	NA	0.49125	30760_irnt
MT:7028:C:T	Affx-34462190	0.56206	-0.00093652	0.0016795	0.5771	30780_irnt		MT:7028:C:T	Affx-34462190	0.56206	-0.00094065	0.0016795	0.57542	30780_irnt		MT:7028:C:T	Affx-34462190	0.56206	-0.00094065	0.0016795	NA	0.57542	30780_irnt
MT:7028:C:T	Affx-34462190	0.56206	0.0016957	0.0016539	0.30523	30870_irnt		MT:7028:C:T	Affx-34462190	0.56206	0.0017091	0.0016547	0.30167	30870_irnt		MT:7028:C:T	Affx-34462190	0.56206	0.0017091	0.0016547	NA	0.30167	30870_irnt
MT:7028:C:T	Affx-34462190	0.56206	-0.0010457	0.002144	0.62573	3148_irnt		MT:7028:C:T	Affx-34462190	0.56206	-0.001057	0.0021441	0.62203	3148_irnt		MT:7028:C:T	Affx-34462190	0.56206	-0.001057	0.0021441	NA	0.62203	3148_irnt
MT:7028:C:T	Affx-34462190	0.56206	0.00038502	0.0004638	0.40645	3393		MT:7028:C:T	Affx-34462190	0.56206	0.00038358	0.0004638	0.40821	3393		MT:7028:C:T	Affx-34462190	0.56206	0.0085442	NA	0.72623	0.39411	3393
MT:7028:C:T	Affx-34462190	0.56206	-0.00075771	0.0016945	0.65477	4079_irnt		MT:7028:C:T	Affx-34462190	0.56206	-0.00076498	0.0016945	0.65167	4079_irnt		MT:7028:C:T	Affx-34462190	0.56206	-0.00076498	0.0016945	NA	0.65167	4079_irnt
MT:7028:C:T	Affx-34462190	0.56206	0.00090712	0.0016045	0.57183	4080_irnt		MT:7028:C:T	Affx-34462190	0.56206	0.00090228	0.0016046	0.57392	4080_irnt		MT:7028:C:T	Affx-34462190	0.56206	0.00090228	0.0016046	NA	0.57392	4080_irnt
MT:7028:C:T	Affx-34462190	0.56206	0.00019416	0.00034869	0.57764	C3_SKIN		MT:7028:C:T	Affx-34462190	0.56206	0.00019375	0.00034869	0.57845	C3_SKIN		MT:7028:C:T	Affx-34462190	0.56206	0.004409	NA	0.2966	0.58602	C3_SKIN
MT:7028:C:T	Affx-34462190	0.56206	0.00047376	0.00029728	0.11102	H26		MT:7028:C:T	Affx-34462190	0.56206	0.00047384	0.00029728	0.11096	H26		MT:7028:C:T	Affx-34462190	0.56206	0.015158	NA	2.5427	0.11081	H26
MT:7028:C:T	Affx-34462190	0.56206	-0.00019416	0.00022604	0.39037	I48		MT:7028:C:T	Affx-34462190	0.56206	-0.00019389	0.00022604	0.39103	I48		MT:7028:C:T	Affx-34462190	0.56206	-0.010615	NA	0.72462	0.39463	I48
MT:7028:C:T	Affx-34462190	0.56206	0.00021752	0.00027489	0.42878	I9_CHD		MT:7028:C:T	Affx-34462190	0.56206	0.00021866	0.00027492	0.42641	I9_CHD		MT:7028:C:T	Affx-34462190	0.56206	0.0083989	NA	0.66845	0.41359	I9_CHD
MT:7028:C:T	Affx-34462190	0.56206	-0.00011654	0.00038341	0.76117	I9_IHD		MT:7028:C:T	Affx-34462190	0.56206	-0.00011235	0.00038348	0.76955	I9_IHD		MT:7028:C:T	Affx-34462190	0.56206	-0.0019809	NA	0.072452	0.7878	I9_IHD
MT:7028:C:T	Affx-34462190	0.56206	-2.662e-05	0.00029257	0.9275	K21		MT:7028:C:T	Affx-34462190	0.56206	-2.6233e-05	0.00029257	0.92856	K21		MT:7028:C:T	Affx-34462190	0.56206	-0.00082974	NA	0.0074022	0.93144	K21
MT:7028:C:T	Affx-34462190	0.56206	0.00012452	0.00025367	0.6235	K44		MT:7028:C:T	Affx-34462190	0.56206	0.00012487	0.00025367	0.62254	K44		MT:7028:C:T	Affx-34462190	0.56206	0.0054937	NA	0.24351	0.62168	K44
MT:7028:C:T	Affx-34462190	0.56206	8.1987e-05	0.00031445	0.7943	K57		MT:7028:C:T	Affx-34462190	0.56206	8.2574e-05	0.00031445	0.79286	K57		MT:7028:C:T	Affx-34462190	0.56206	0.0023075	NA	0.066062	0.79716	K57
MT:7055:A:G	Affx-34462191	0.0033886	-0.0017962	0.0060957	0.76825	20002_1065		MT:7055:A:G	Affx-34462191	0.0033886	-0.0019061	0.0060963	0.75454	20002_1065		MT:7055:A:G	Affx-34462191	0.0033886	-0.010628	NA	0.098444	0.7537	20002_1065
MT:7055:A:G	Affx-34462191	0.0033886	-0.0030944	0.0024695	0.21017	20002_1074		MT:7055:A:G	Affx-34462191	0.0033886	-0.003137	0.0024698	0.20403	20002_1074		MT:7055:A:G	Affx-34462191	0.0033886	-0.11274	NA	1.5789	0.20892	20002_1074
MT:7055:A:G	Affx-34462191	0.0033886	-0.001773	0.0038986	0.64927	20002_1465		MT:7055:A:G	Affx-34462191	0.0033886	-0.0018254	0.0038988	0.63964	20002_1465		MT:7055:A:G	Affx-34462191	0.0033886	-0.026027	NA	0.23834	0.62541	20002_1465
MT:7055:A:G	Affx-34462191	0.0033886	0.0031111	0.004568	0.49583	20002_1473		MT:7055:A:G	Affx-34462191	0.0033886	0.0030145	0.0045687	0.50937	20002_1473		MT:7055:A:G	Affx-34462191	0.0033886	0.02964	NA	0.4421	0.50611	20002_1473
MT:7055:A:G	Affx-34462191	0.0033886	0.0010027	0.0030454	0.74197	2443		MT:7055:A:G	Affx-34462191	0.0033886	0.00091083	0.0030463	0.76495	2443		MT:7055:A:G	Affx-34462191	0.0033886	0.024126	NA	0.12963	0.71882	2443
MT:7055:A:G	Affx-34462191	0.0033886	0.0043137	0.013865	0.7557	30650_irnt		MT:7055:A:G	Affx-34462191	0.0033886	0.0043416	0.013865	0.75417	30650_irnt		MT:7055:A:G	Affx-34462191	0.0033886	0.0043416	0.013865	NA	0.75417	30650_irnt
MT:7055:A:G	Affx-34462191	0.0033886	-0.013762	0.011757	0.24177	30700_irnt		MT:7055:A:G	Affx-34462191	0.0033886	-0.013671	0.011757	0.24489	30700_irnt		MT:7055:A:G	Affx-34462191	0.0033886	-0.013671	0.011757	NA	0.24489	30700_irnt
MT:7055:A:G	Affx-34462191	0.0033886	0.021205	0.015163	0.16197	30740_irnt		MT:7055:A:G	Affx-34462191	0.0033886	0.021063	0.015163	0.16482	30740_irnt		MT:7055:A:G	Affx-34462191	0.0033886	0.021063	0.015163	NA	0.16482	30740_irnt
MT:7055:A:G	Affx-34462191	0.0033886	-0.017802	0.013884	0.19978	30760_irnt		MT:7055:A:G	Affx-34462191	0.0033886	-0.017245	0.01389	0.21442	30760_irnt		MT:7055:A:G	Affx-34462191	0.0033886	-0.017245	0.01389	NA	0.21442	30760_irnt
MT:7055:A:G	Affx-34462191	0.0033886	0.011959	0.014299	0.40298	30780_irnt		MT:7055:A:G	Affx-34462191	0.0033886	0.011994	0.014299	0.40159	30780_irnt		MT:7055:A:G	Affx-34462191	0.0033886	0.011994	0.014299	NA	0.40159	30780_irnt
MT:7055:A:G	Affx-34462191	0.0033886	0.011826	0.014071	0.40067	30870_irnt		MT:7055:A:G	Affx-34462191	0.0033886	0.011405	0.014078	0.41787	30870_irnt		MT:7055:A:G	Affx-34462191	0.0033886	0.011405	0.014078	NA	0.41787	30870_irnt
MT:7055:A:G	Affx-34462191	0.0033886	0.027879	0.018082	0.12313	3148_irnt		MT:7055:A:G	Affx-34462191	0.0033886	0.028113	0.018083	0.12002	3148_irnt		MT:7055:A:G	Affx-34462191	0.0033886	0.028113	0.018083	NA	0.12002	3148_irnt
MT:7055:A:G	Affx-34462191	0.0033886	0.00056499	0.0039618	0.8866	3393		MT:7055:A:G	Affx-34462191	0.0033886	0.00057841	0.0039618	0.88392	3393		MT:7055:A:G	Affx-34462191	0.0033886	0.017236	NA	0.040737	0.84005	3393
MT:7055:A:G	Affx-34462191	0.0033886	-0.0093888	0.014419	0.51496	4079_irnt		MT:7055:A:G	Affx-34462191	0.0033886	-0.0094511	0.014419	0.51217	4079_irnt		MT:7055:A:G	Affx-34462191	0.0033886	-0.0094511	0.014419	NA	0.51217	4079_irnt
MT:7055:A:G	Affx-34462191	0.0033886	-0.0094679	0.013653	0.48802	4080_irnt		MT:7055:A:G	Affx-34462191	0.0033886	-0.0096317	0.013654	0.48056	4080_irnt		MT:7055:A:G	Affx-34462191	0.0033886	-0.0096317	0.013654	NA	0.48056	4080_irnt
MT:7055:A:G	Affx-34462191	0.0033886	0.0033067	0.0029754	0.26643	C3_SKIN		MT:7055:A:G	Affx-34462191	0.0033886	0.0033186	0.0029754	0.2647	C3_SKIN		MT:7055:A:G	Affx-34462191	0.0033886	0.077309	NA	1.3507	0.24515	C3_SKIN
MT:7055:A:G	Affx-34462191	0.0033886	-0.0017848	0.0025368	0.4817	H26		MT:7055:A:G	Affx-34462191	0.0033886	-0.0017895	0.0025368	0.48054	H26		MT:7055:A:G	Affx-34462191	0.0033886	-0.050678	NA	0.35598	0.55075	H26
MT:7055:A:G	Affx-34462191	0.0033886	-0.00051711	0.0019289	0.78863	I48		MT:7055:A:G	Affx-34462191	0.0033886	-0.00052858	0.0019289	0.78406	I48		MT:7055:A:G	Affx-34462191	0.0033886	-0.018246	NA	0.028039	0.86702	I48
MT:7055:A:G	Affx-34462191	0.0033886	-0.00062063	0.0023457	0.79133	I9_CHD		MT:7055:A:G	Affx-34462191	0.0033886	-0.00066599	0.002346	0.7765	I9_CHD		MT:7055:A:G	Affx-34462191	0.0033886	-0.019319	NA	0.046667	0.82897	I9_CHD
MT:7055:A:G	Affx-34462191	0.0033886	-0.0011595	0.0032717	0.72305	I9_IHD		MT:7055:A:G	Affx-34462191	0.0033886	-0.0012328	0.0032723	0.70637	I9_IHD		MT:7055:A:G	Affx-34462191	0.0033886	-0.021762	NA	0.11517	0.73433	I9_IHD
MT:7055:A:G	Affx-34462191	0.0033886	0.0011326	0.0024966	0.65006	K21		MT:7055:A:G	Affx-34462191	0.0033886	0.0011135	0.0024966	0.6556	K21		MT:7055:A:G	Affx-34462191	0.0033886	0.040739	NA	0.25782	0.61162	K21
MT:7055:A:G	Affx-34462191	0.0033886	-0.0014353	0.0021646	0.50729	K44		MT:7055:A:G	Affx-34462191	0.0033886	-0.0014505	0.0021646	0.50281	K44		MT:7055:A:G	Affx-34462191	0.0033886	-0.058253	NA	0.34926	0.55453	K44
MT:7055:A:G	Affx-34462191	0.0033886	0.00076787	0.0026832	0.77475	K57		MT:7055:A:G	Affx-34462191	0.0033886	0.00074349	0.0026833	0.78172	K57		MT:7055:A:G	Affx-34462191	0.0033886	0.025735	NA	0.11491	0.73462	K57
MT:7175:T:C	Affx-34462202	0.00044564	0.0046002	0.017786	0.79591	20002_1065		MT:7175:T:C	Affx-34462202	0.00044564	0.0046244	0.017788	0.79488	20002_1065		MT:7175:T:C	Affx-34462202	0.00044564	0.031328	NA	0.10231	0.74908	20002_1065
MT:7175:T:C	Affx-34462202	0.00044564	0.023199	0.041356	0.57482	30650_irnt		MT:7175:T:C	Affx-34462202	0.00044564	0.023187	0.041356	0.57501	30650_irnt		MT:7175:T:C	Affx-34462202	0.00044564	0.023187	0.041356	NA	0.57501	30650_irnt
MT:7175:T:C	Affx-34462202	0.00044564	-0.058258	0.034964	0.095672	30700_irnt		MT:7175:T:C	Affx-34462202	0.00044564	-0.058287	0.034965	0.095516	30700_irnt		MT:7175:T:C	Affx-34462202	0.00044564	-0.058287	0.034965	NA	0.095516	30700_irnt
MT:7175:T:C	Affx-34462202	0.00044564	0.0024033	0.044269	0.9567	30740_irnt		MT:7175:T:C	Affx-34462202	0.00044564	0.0024302	0.044269	0.95622	30740_irnt		MT:7175:T:C	Affx-34462202	0.00044564	0.0024302	0.044269	NA	0.95622	30740_irnt
MT:7175:T:C	Affx-34462202	0.00044564	-0.021767	0.040699	0.59276	30760_irnt		MT:7175:T:C	Affx-34462202	0.00044564	-0.021877	0.040716	0.59106	30760_irnt		MT:7175:T:C	Affx-34462202	0.00044564	-0.021877	0.040716	NA	0.59106	30760_irnt
MT:7175:T:C	Affx-34462202	0.00044564	-0.049594	0.042616	0.24453	30780_irnt		MT:7175:T:C	Affx-34462202	0.00044564	-0.049604	0.042616	0.24443	30780_irnt		MT:7175:T:C	Affx-34462202	0.00044564	-0.049604	0.042616	NA	0.24443	30780_irnt
MT:7175:T:C	Affx-34462202	0.00044564	-0.033495	0.041989	0.42504	30870_irnt		MT:7175:T:C	Affx-34462202	0.00044564	-0.033352	0.042011	0.42727	30870_irnt		MT:7175:T:C	Affx-34462202	0.00044564	-0.033352	0.042011	NA	0.42727	30870_irnt
MT:7175:T:C	Affx-34462202	0.00044564	-0.060384	0.05176	0.24337	3148_irnt		MT:7175:T:C	Affx-34462202	0.00044564	-0.060429	0.051762	0.24304	3148_irnt		MT:7175:T:C	Affx-34462202	0.00044564	-0.060429	0.051762	NA	0.24304	3148_irnt
MT:7175:T:C	Affx-34462202	0.00044564	0.014001	0.041841	0.7379	4079_irnt		MT:7175:T:C	Affx-34462202	0.00044564	0.014024	0.041841	0.7375	4079_irnt		MT:7175:T:C	Affx-34462202	0.00044564	0.014024	0.041841	NA	0.7375	4079_irnt
MT:7175:T:C	Affx-34462202	0.00044564	-0.012735	0.039619	0.74787	4080_irnt		MT:7175:T:C	Affx-34462202	0.00044564	-0.012687	0.039622	0.74881	4080_irnt		MT:7175:T:C	Affx-34462202	0.00044564	-0.012687	0.039622	NA	0.74881	4080_irnt
MT:7476:C:T	Affx-79443447	0.018295	-0.0009912	0.0026433	0.70767	20002_1065		MT:7476:C:T	Affx-79443447	0.018295	-0.00094122	0.0026436	0.72181	20002_1065		MT:7476:C:T	Affx-79443447	0.018295	-0.0051104	NA	0.12206	0.72681	20002_1065
MT:7476:C:T	Affx-79443447	0.018295	0.00022779	0.0010708	0.83155	20002_1074		MT:7476:C:T	Affx-79443447	0.018295	0.00024557	0.001071	0.81864	20002_1074		MT:7476:C:T	Affx-79443447	0.018295	0.0089336	NA	0.062018	0.80333	20002_1074
MT:7476:C:T	Affx-79443447	0.018295	-0.0011636	0.0016906	0.49129	20002_1465		MT:7476:C:T	Affx-79443447	0.018295	-0.0011389	0.0016907	0.50055	20002_1465		MT:7476:C:T	Affx-79443447	0.018295	-0.015334	NA	0.44526	0.50459	20002_1465
MT:7476:C:T	Affx-79443447	0.018295	-0.0022567	0.0019808	0.2546	20002_1473		MT:7476:C:T	Affx-79443447	0.018295	-0.0022112	0.0019811	0.26437	20002_1473		MT:7476:C:T	Affx-79443447	0.018295	-0.021535	NA	1.199	0.27351	20002_1473
MT:7476:C:T	Affx-79443447	0.018295	-0.0010325	0.0013197	0.43401	2443		MT:7476:C:T	Affx-79443447	0.018295	-0.0009933	0.0013201	0.45179	2443		MT:7476:C:T	Affx-79443447	0.018295	-0.021573	NA	0.52823	0.46735	2443
MT:7476:C:T	Affx-79443447	0.018295	0.0023379	0.0060343	0.69843	30650_irnt		MT:7476:C:T	Affx-79443447	0.018295	0.0023214	0.0060343	0.70046	30650_irnt		MT:7476:C:T	Affx-79443447	0.018295	0.0023214	0.0060343	NA	0.70046	30650_irnt
MT:7476:C:T	Affx-79443447	0.018295	0.0010322	0.0051102	0.83992	30700_irnt		MT:7476:C:T	Affx-79443447	0.018295	0.00098806	0.0051104	0.84669	30700_irnt		MT:7476:C:T	Affx-79443447	0.018295	0.00098806	0.0051104	NA	0.84669	30700_irnt
MT:7476:C:T	Affx-79443447	0.018295	-0.0055759	0.0065619	0.39548	30740_irnt		MT:7476:C:T	Affx-79443447	0.018295	-0.0055342	0.0065621	0.39902	30740_irnt		MT:7476:C:T	Affx-79443447	0.018295	-0.0055342	0.0065621	NA	0.39902	30740_irnt
MT:7476:C:T	Affx-79443447	0.018295	0.0015526	0.0060073	0.79606	30760_irnt		MT:7476:C:T	Affx-79443447	0.018295	0.0013836	0.00601	0.81793	30760_irnt		MT:7476:C:T	Affx-79443447	0.018295	0.0013836	0.00601	NA	0.81793	30760_irnt
MT:7476:C:T	Affx-79443447	0.018295	-0.0027952	0.0062064	0.65244	30780_irnt		MT:7476:C:T	Affx-79443447	0.018295	-0.0028097	0.0062064	0.65076	30780_irnt		MT:7476:C:T	Affx-79443447	0.018295	-0.0028097	0.0062064	NA	0.65076	30780_irnt
MT:7476:C:T	Affx-79443447	0.018295	-0.0069133	0.0061146	0.25821	30870_irnt		MT:7476:C:T	Affx-79443447	0.018295	-0.0067046	0.0061178	0.27312	30870_irnt		MT:7476:C:T	Affx-79443447	0.018295	-0.0067046	0.0061178	NA	0.27312	30870_irnt
MT:7476:C:T	Affx-79443447	0.018295	-0.0014103	0.0079828	0.85977	3148_irnt		MT:7476:C:T	Affx-79443447	0.018295	-0.0014482	0.0079831	0.85605	3148_irnt		MT:7476:C:T	Affx-79443447	0.018295	-0.0014482	0.0079831	NA	0.85605	3148_irnt
MT:7476:C:T	Affx-79443447	0.018295	-0.0021196	0.0017124	0.21579	3393		MT:7476:C:T	Affx-79443447	0.018295	-0.0021232	0.0017124	0.21502	3393		MT:7476:C:T	Affx-79443447	0.018295	-0.04702	NA	1.5446	0.21394	3393
MT:7476:C:T	Affx-79443447	0.018295	-0.0048724	0.0062599	0.43637	4079_irnt		MT:7476:C:T	Affx-79443447	0.018295	-0.0048293	0.00626	0.44044	4079_irnt		MT:7476:C:T	Affx-79443447	0.018295	-0.0048293	0.00626	NA	0.44044	4079_irnt
MT:7476:C:T	Affx-79443447	0.018295	-0.004678	0.0059274	0.42999	4080_irnt		MT:7476:C:T	Affx-79443447	0.018295	-0.004579	0.0059279	0.43985	4080_irnt		MT:7476:C:T	Affx-79443447	0.018295	-0.004579	0.0059279	NA	0.43985	4080_irnt
MT:7476:C:T	Affx-79443447	0.018295	0.00032008	0.0012902	0.80406	C3_SKIN		MT:7476:C:T	Affx-79443447	0.018295	0.00031454	0.0012902	0.80738	C3_SKIN		MT:7476:C:T	Affx-79443447	0.018295	0.0075919	NA	0.064912	0.79889	C3_SKIN
MT:7476:C:T	Affx-79443447	0.018295	0.0018801	0.0011	0.087401	H26		MT:7476:C:T	Affx-79443447	0.018295	0.0018824	0.0010999	0.087024	H26		MT:7476:C:T	Affx-79443447	0.018295	0.058054	NA	2.918	0.087597	H26
MT:7476:C:T	Affx-79443447	0.018295	-0.00023403	0.00083636	0.77961	I48		MT:7476:C:T	Affx-79443447	0.018295	-0.00022862	0.00083637	0.78459	I48		MT:7476:C:T	Affx-79443447	0.018295	-0.011409	NA	0.060208	0.80617	I48
MT:7476:C:T	Affx-79443447	0.018295	0.0007911	0.0010171	0.43669	I9_CHD		MT:7476:C:T	Affx-79443447	0.018295	0.00081242	0.0010172	0.42449	I9_CHD		MT:7476:C:T	Affx-79443447	0.018295	0.031226	NA	0.70014	0.40274	I9_CHD
MT:7476:C:T	Affx-79443447	0.018295	0.00081582	0.0014186	0.56524	I9_IHD		MT:7476:C:T	Affx-79443447	0.018295	0.00084811	0.0014189	0.55002	I9_IHD		MT:7476:C:T	Affx-79443447	0.018295	0.016694	NA	0.38246	0.53629	I9_IHD
MT:7476:C:T	Affx-79443447	0.018295	0.00015374	0.0010825	0.88706	K21		MT:7476:C:T	Affx-79443447	0.018295	0.00016284	0.0010825	0.88043	K21		MT:7476:C:T	Affx-79443447	0.018295	0.0063174	NA	0.031586	0.85894	K21
MT:7476:C:T	Affx-79443447	0.018295	-0.00030069	0.00093858	0.74869	K44		MT:7476:C:T	Affx-79443447	0.018295	-0.00029351	0.00093859	0.7545	K44		MT:7476:C:T	Affx-79443447	0.018295	-0.011762	NA	0.080136	0.77711	K44
MT:7476:C:T	Affx-79443447	0.018295	-0.0019235	0.0011634	0.098272	K57		MT:7476:C:T	Affx-79443447	0.018295	-0.001912	0.0011635	0.10031	K57		MT:7476:C:T	Affx-79443447	0.018295	-0.057099	NA	2.7619	0.096531	K57
MT:7521:G:A	Affx-34462220	0.0047744	0.029265	0.015545	0.059762	20002_1065		MT:7521:G:A	Affx-34462220	0.0047744	0.029241	0.015547	0.059996	20002_1065		MT:7521:G:A	Affx-34462220	0.0047744	0.14828	NA	3.3459	0.067374	20002_1065
MT:7521:G:A	Affx-34462220	0.0047744	-0.0081748	0.011649	0.48284	20002_1473		MT:7521:G:A	Affx-34462220	0.0047744	-0.0081951	0.011651	0.48182	20002_1473		MT:7521:G:A	Affx-34462220	0.0047744	-0.07103	NA	0.39389	0.53026	20002_1473
[truncated: 2,533 more rows]
