# Supplementary material for: Human genetic analyses of organelles highlight the nucleus in age-related trait heritability
Source: eLife. 2021 Sep 1;10:e68610. doi: 10.7554/eLife.68610 (PMC8476128; doi:10.7554/eLife.68610)
Supplement: Source data 3. [file elife-68610-data3.xlsx]

## Sheet: Sheet1
Gupta et al. 2021 Source data 3: Coefficient point estimates and p-values for all tested gene-sets for aging phenotypes.
geneset	n_genes	trait	p	effect	effect_se	Method
Other Nuclear Proteins	2004	Parental Lifespan	0.068027	0.03183	0.021352	MAGMA, 5kb
Other Nuclear Proteins	2004	First Morbidity Hazard	0.95123	-0.03383	0.020417	MAGMA, 5kb
Nuclear Envelope	243	Parental Lifespan	0.49726	0.00037907	0.055162	MAGMA, 5kb
Nuclear Envelope	243	First Morbidity Hazard	0.26765	0.033281	0.053684	MAGMA, 5kb
Nucleolus	573	Parental Lifespan	0.50911	-0.00083968	0.036752	MAGMA, 5kb
Nucleolus	573	First Morbidity Hazard	0.26107	0.022371	0.034951	MAGMA, 5kb
Nucleoplasm	1696	Parental Lifespan	0.12331	0.026493	0.022866	MAGMA, 5kb
Nucleoplasm	1696	First Morbidity Hazard	0.11389	0.02645	0.021929	MAGMA, 5kb
Chromosome and TF	1790	Parental Lifespan	0.0016084	0.07235	0.024553	MAGMA, 5kb
Chromosome and TF	1790	First Morbidity Hazard	0.0065954	0.057413	0.023161	MAGMA, 5kb
Cytoskeleton	1162	Parental Lifespan	0.51498	-0.0010434	0.027786	MAGMA, 5kb
Cytoskeleton	1162	First Morbidity Hazard	0.6103	-0.0073502	0.026241	MAGMA, 5kb
Cytosol	2848	Parental Lifespan	0.72097	-0.01095	0.018694	MAGMA, 5kb
Cytosol	2848	First Morbidity Hazard	0.32607	0.0079543	0.017645	MAGMA, 5kb
Endoplasmic reticulum	1097	Parental Lifespan	0.35287	0.010523	0.027867	MAGMA, 5kb
Endoplasmic reticulum	1097	First Morbidity Hazard	0.038194	0.04686	0.026442	MAGMA, 5kb
Endosome	461	Parental Lifespan	0.017866	0.088937	0.042348	MAGMA, 5kb
Endosome	461	First Morbidity Hazard	0.39956	0.010405	0.040885	MAGMA, 5kb
Extracellular space	860	Parental Lifespan	0.72983	-0.020226	0.033032	MAGMA, 5kb
Extracellular space	860	First Morbidity Hazard	0.76013	-0.022207	0.031422	MAGMA, 5kb
Golgi apparatus	758	Parental Lifespan	0.59855	-0.0085911	0.034418	MAGMA, 5kb
Golgi apparatus	758	First Morbidity Hazard	0.79423	-0.026858	0.032706	MAGMA, 5kb
Lysosome	274	Parental Lifespan	0.50454	-0.00061697	0.054258	MAGMA, 5kb
Lysosome	274	First Morbidity Hazard	0.29066	0.028573	0.051811	MAGMA, 5kb
Mitochondrion	1106	Parental Lifespan	0.90855	-0.035875	0.026934	MAGMA, 5kb
Mitochondrion	1106	First Morbidity Hazard	0.619	-0.0078997	0.026083	MAGMA, 5kb
Nucleus	6204	Parental Lifespan	0.00029136	0.049704	0.014448	MAGMA, 5kb
Nucleus	6204	First Morbidity Hazard	0.05865	0.021457	0.013699	MAGMA, 5kb
Plasma membrane	4176	Parental Lifespan	0.48315	0.0007214	0.017078	MAGMA, 5kb
Plasma membrane	4176	First Morbidity Hazard	0.44931	0.0020524	0.01611	MAGMA, 5kb
Chromosome and TF	1804	First Morbidity Hazard	0.00010298	4.90823e-09	1.3224e-09	S-LDSC, 100kb
Nucleus	6263	First Morbidity Hazard	0.00159556	2.61964e-09	8.88404e-10	S-LDSC, 100kb
Nucleoplasm	1702	First Morbidity Hazard	0.016048	2.27424e-09	1.06114e-09	S-LDSC, 100kb
Lysosome	274	First Morbidity Hazard	0.0873473	4.23562e-09	3.12068e-09	S-LDSC, 100kb
Endoplasmic reticulum	1108	First Morbidity Hazard	0.0970871	1.57372e-09	1.21211e-09	S-LDSC, 100kb
Endosome	464	First Morbidity Hazard	0.123362	1.96819e-09	1.69915e-09	S-LDSC, 100kb
Mitochondrion	1105	First Morbidity Hazard	0.411068	2.74126e-10	1.21943e-09	S-LDSC, 100kb
Nucleolus	580	First Morbidity Hazard	0.452241	1.89857e-10	1.58211e-09	S-LDSC, 100kb
Cytosol	2855	First Morbidity Hazard	0.473265	5.74559e-11	8.56714e-10	S-LDSC, 100kb
Other Nuclear Proteins	2034	First Morbidity Hazard	0.499652	9.0862e-13	1.04204e-09	S-LDSC, 100kb
Extracellular space	864	First Morbidity Hazard	0.517185	-5.44114e-11	1.26278e-09	S-LDSC, 100kb
Nuclear Envelope	246	First Morbidity Hazard	0.538156	-1.94767e-10	2.03328e-09	S-LDSC, 100kb
Cytoskeleton	1162	First Morbidity Hazard	0.539243	-1.02864e-10	1.04401e-09	S-LDSC, 100kb
Plasma membrane	4191	First Morbidity Hazard	0.845596	-6.91635e-10	6.79589e-10	S-LDSC, 100kb
Golgi apparatus	762	First Morbidity Hazard	0.935962	-1.79693e-09	1.18085e-09	S-LDSC, 100kb
Extracellular space	864	Parental Lifespan	0.0329028	1.97285e-09	1.07235e-09	S-LDSC, 100kb
Endosome	464	Parental Lifespan	0.0733019	1.33239e-09	9.17859e-10	S-LDSC, 100kb
Nucleus	6263	Parental Lifespan	0.0789229	6.09114e-10	4.31276e-10	S-LDSC, 100kb
Nucleoplasm	1702	Parental Lifespan	0.108036	7.85359e-10	6.34868e-10	S-LDSC, 100kb
Chromosome and TF	1804	Parental Lifespan	0.123463	6.64878e-10	5.74236e-10	S-LDSC, 100kb
Plasma membrane	4191	Parental Lifespan	0.40265	1.14214e-10	4.63354e-10	S-LDSC, 100kb
Endoplasmic reticulum	1108	Parental Lifespan	0.411408	1.54272e-10	6.88944e-10	S-LDSC, 100kb
Nuclear Envelope	246	Parental Lifespan	0.493173	2.5178e-11	1.47118e-09	S-LDSC, 100kb
Nucleolus	580	Parental Lifespan	0.496181	9.78678e-12	1.02236e-09	S-LDSC, 100kb
Other Nuclear Proteins	2034	Parental Lifespan	0.529706	-4.23593e-11	5.68354e-10	S-LDSC, 100kb
Lysosome	274	Parental Lifespan	0.548082	-1.48988e-10	1.23317e-09	S-LDSC, 100kb
Golgi apparatus	762	Parental Lifespan	0.628048	-2.34029e-10	7.16368e-10	S-LDSC, 100kb
Cytoskeleton	1162	Parental Lifespan	0.640979	-2.0288e-10	5.61876e-10	S-LDSC, 100kb
Cytosol	2855	Parental Lifespan	0.794554	-4.38688e-10	5.33473e-10	S-LDSC, 100kb
Mitochondrion	1105	Parental Lifespan	0.878134	-9.65892e-10	8.28585e-10	S-LDSC, 100kb
