# Supplementary material for: Human genetic analyses of organelles highlight the nucleus in age-related trait heritability
Source: eLife journal article supplement (doi:10.7554/elife.68610), 2021-09-01
Supplement: supp [file elife-68610-supp-v1.zip]

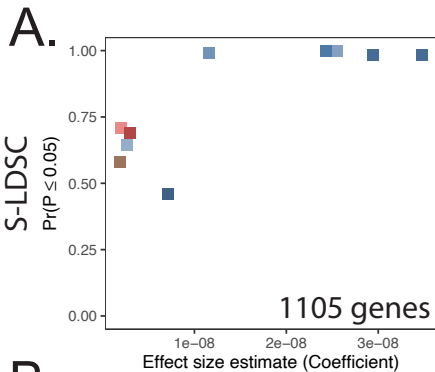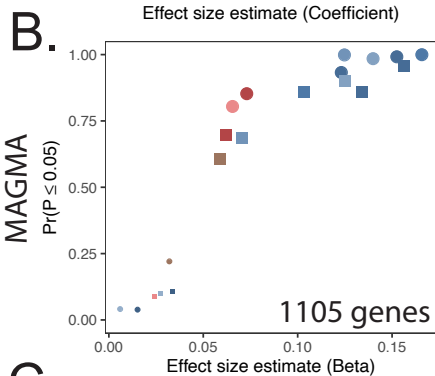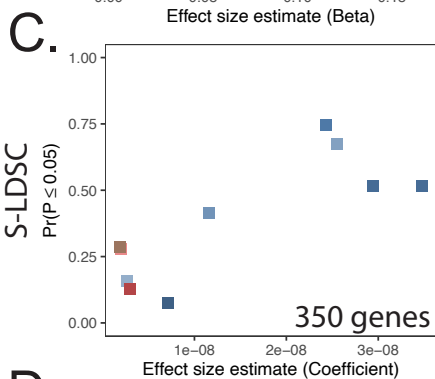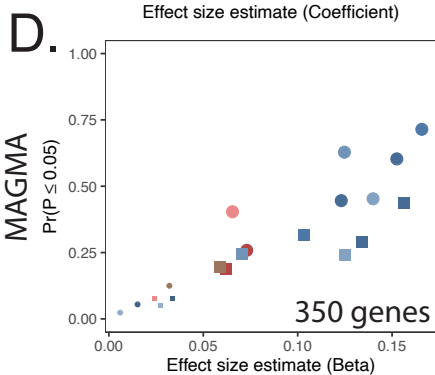

Disease

- Atrial Fibrillation
- Diverticular Disease
- Glucose
- HDL-C
- LDL-C
- Myocardial Infarction
- Raised Total Cholesterol
- Triglycerides
- Type 2 Diabetes Mellitus

Window

- 5
- 100

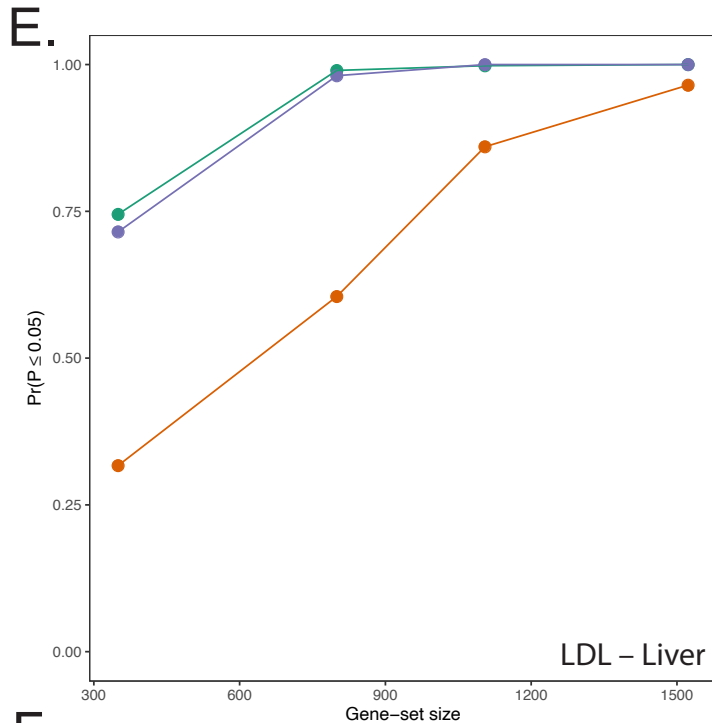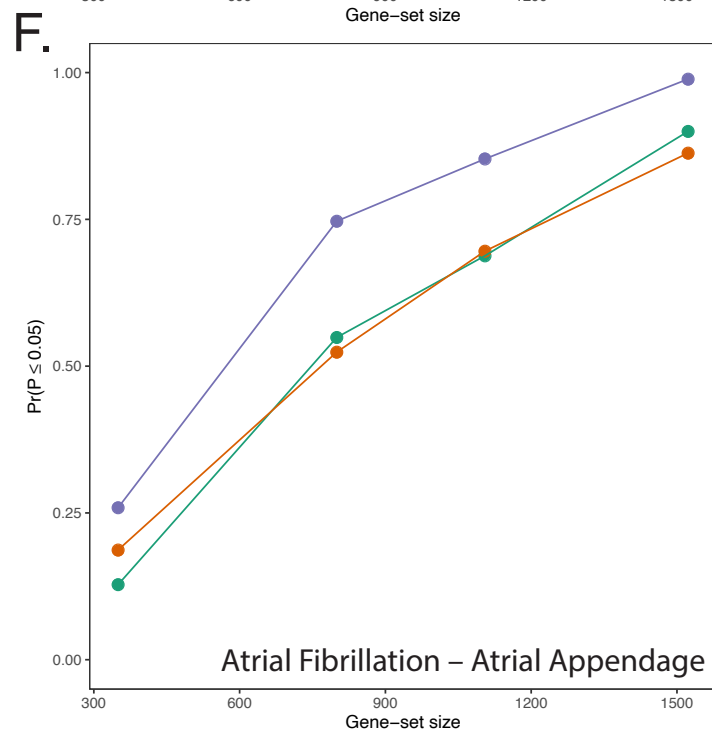

Method

- LDSC, 100kb
- MAGMA, 100kb up
- MAGMA, 5kb up

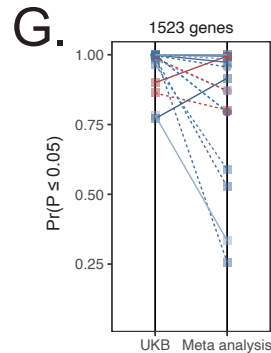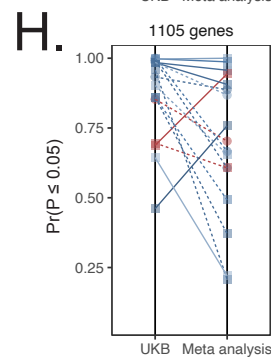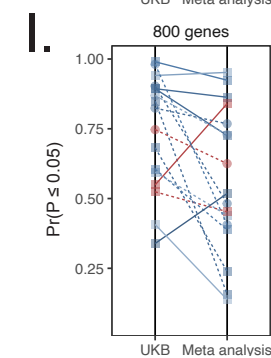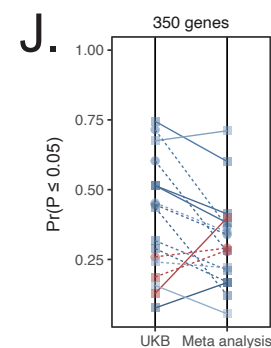

Disease

- Atrial Fibrillation
- Glucose
- HDL-C
- LDL-C
- Triglycerides
- Type 2 Diabetes Mellitus

Window

- 5
- 100

Method

- LDSC
- MAGMA
