# Supplementary material for: Human genetic analyses of organelles highlight the nucleus in age-related trait heritability
Source: eLife journal article supplement (doi:10.7554/elife.68610), 2021-09-01
Supplement: supp [file elife-68610-supp-v1.zip]

A.

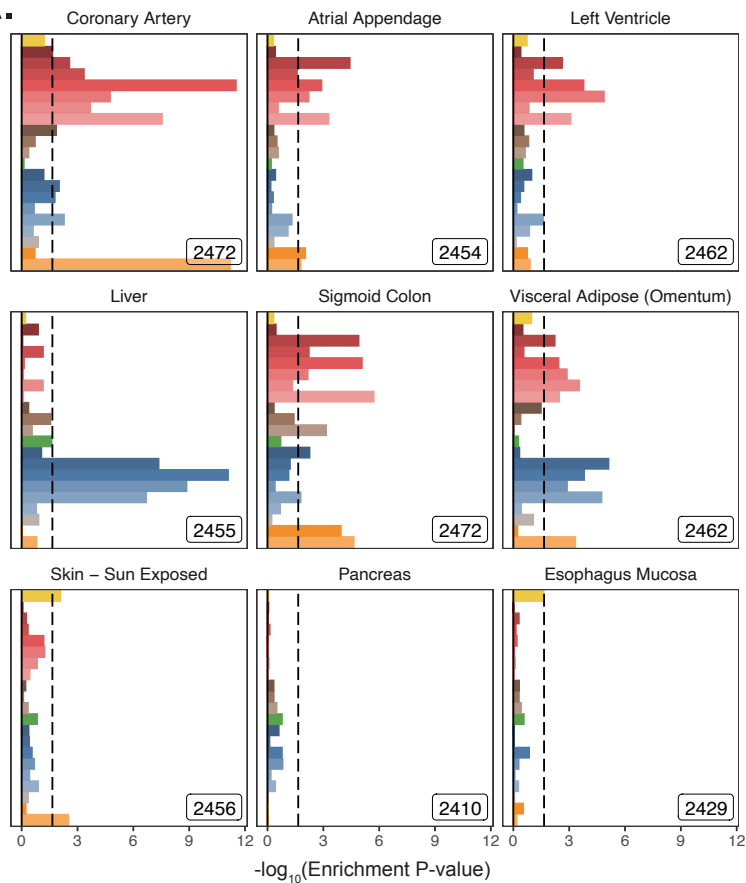**Cancers**

Primary Skin Malignancy

**Cardiovascular**

- \* Angina
- \* Atrial Fibrillation
- \* Coronary Artery Disease
- \* Diastolic BP
- \* Hypertension
- \* Myocardial Infarction
- \* Systolic BP

**Digestive**

- Diaphragmatic Hernia
- Diverticular Disease
- GERD

B.

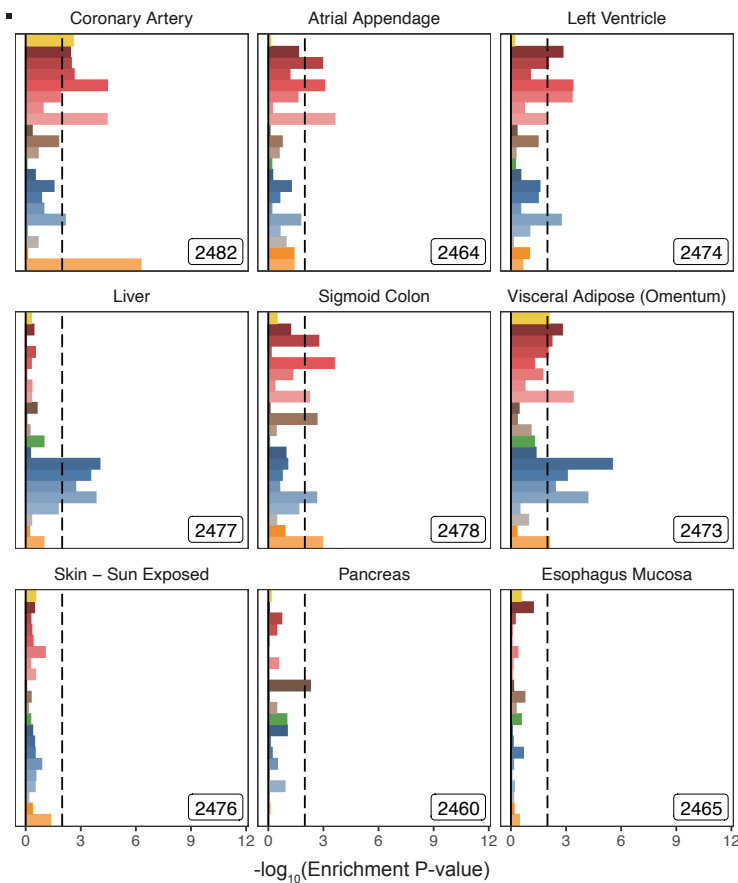**Ear**

Deafness

**Endocrine / Metabolic**

- \* Glucose
- \* HDL-C
- \* LDL-C
- \* Raised Total Cholesterol
- \* Triglycerides
- \* Type 2 Diabetes Mellitus

**Eye**

Cataracts

**Musculoskeletal**

- \* Osteoarthritis
- \* Osteoporosis/BMD
