# Supplementary material for: Human genetic analyses of organelles highlight the nucleus in age-related trait heritability
Source: eLife journal article supplement (doi:10.7554/elife.68610), 2021-09-01
Supplement: supp [file elife-68610-supp-v1.zip]

| Phenotype                | Median onset age | UK Biobank  |        |       |          |       |            | Meta analysis              |          |         |          |       |            |
|--------------------------|------------------|-------------|--------|-------|----------|-------|------------|----------------------------|----------|---------|----------|-------|------------|
|                          |                  | Code        | N      | Cases | Controls | $h^2$ | $h_{se}^2$ | Study                      | N        | Cases   | Controls | $h^2$ | $h_{se}^2$ |
| GERD                     | 50               | K21         | 361194 | 10743 | 350451   | 0.08  | 0.01       |                            |          |         |          |       |            |
| Deafness                 | 52               | 3393        | 219358 | 10942 | 208416   | 0.10  | 0.02       |                            |          |         |          |       |            |
| Raised Total Cholesterol | 56               | 20002.1473  | 361141 | 43957 | 317184   | 0.12  | 0.01       |                            |          |         |          |       |            |
| HDL-C                    | 57†              | 30760_irtnt | 315133 | –     | –        | 0.22  | 0.01       | Teslovich et al., 2010     | 99900*   | –       | –        | 0.12  | 0.01       |
| LDL-C                    | 57†              | 30780_irtnt | 343621 | –     | –        | 0.10  | 0.01       | Teslovich et al., 2010     | 95454*   | –       | –        | 0.10  | 0.01       |
| Triglycerides            | 57†              | 30870_irtnt | 343992 | –     | –        | 0.17  | 0.01       | Teslovich et al., 2010     | 96598*   | –       | –        | 0.12  | 0.02       |
| Diastolic BP             | 59†              | 4079_irtnt  | 340162 | –     | –        | 0.14  | 0.01       | ICBP 2011                  | 69395*   | –       | –        | 0.14  | 0.02       |
| Hypertension             | 59               | 20002.1065  | 361141 | 93560 | 267581   | 0.22  | 0.01       |                            |          |         |          |       |            |
| Systolic BP              | 59†              | 4080_irtnt  | 340159 | –     | –        | 0.15  | 0.01       | ICBP 2011                  | 69395*   | –       | –        | 0.14  | 0.02       |
| Diaphragmatic Hernia     | 60               | K44         | 361194 | 8042  | 353152   | 0.08  | 0.02       |                            |          |         |          |       |            |
| Glucose                  | 61†              | 30740_irtnt | 314916 | –     | –        | 0.08  | 0.01       | Manning et al. 2012        | 58074    | –       | –        | 0.09  | 0.02       |
| Osteoarthritis           | 61               | 20002.1465  | 361141 | 30046 | 331095   | 0.07  | 0.01       |                            |          |         |          |       |            |
| Type 2 Diabetes Mellitus | 61               | 2443        | 360192 | 17275 | 342917   | 0.21  | 0.02       | Morris et al. 2012         | 69033*   | 12171*  | 56862*   | 0.18  | 0.03       |
| Angina                   | 64               | 20002.1074  | 361141 | 11370 | 349771   | 0.17  | 0.02       |                            |          |         |          |       |            |
| Myocardial Infarction    | 65               | I9_CHD      | 361194 | 10157 | 351037   | 0.14  | 0.02       |                            |          |         |          |       |            |
| Diverticular Disease     | 67               | K57         | 361194 | 12662 | 348532   | 0.13  | 0.01       |                            |          |         |          |       |            |
| Primary Skin Malignancy  | 68               | C3.SKIN     | 361194 | 16531 | 344663   | 0.16  | 0.03       |                            |          |         |          |       |            |
| Coronary Artery Disease  | 70               | I9_IHD      | 361194 | 20857 | 340337   | 0.15  | 0.01       | Schunkert et al., 2011     | 86995*   | 22233*  | 64762*   | 0.07  | 0.01       |
| Osteoporosis/BMD         | 71†              | 3148_irtnt  | 206496 | –     | –        | 0.28  | 0.02       | Estrada et al 2012         | 32961    | –       | –        | 0.26  | 0.03       |
| Atrial Fibrillation      | 74               | I48         | 361194 | 6356  | 354838   | 0.14  | 0.03       | Christophersen et al. 2017 | 133073   | 17931   | 115142   | 0.06  | 0.01       |
| Cataracts                | 74               | H26         | 361194 | 11306 | 349888   | 0.09  | 0.01       |                            |          |         |          |       |            |
| eGFR                     | 74†              |             |        |       |          |       |            | Pattaro et al., 2016       | 133413*  | –       | –        | 0.12  | 0.01       |
| Parkinson's Disease§     | 74               |             |        |       |          |       |            | Nalls et al., 2019         | 482730** | 33674** | 449056** | 0.03  | 0.00       |
| Alzheimer's Disease      | 83               |             |        |       |          |       |            | Lambert et al., 2013       | 54162    | 17008   | 37154    | 0.05  | 0.01       |

We only show sample sizes for traits with heritability Z score  $\geq 4$  as obtained by S-LDSC.

\* variant-specific sample sizes used in analysis; displayed values are maximal values reported in associated publication

\*\* variant-specific sample size used in analysis and to obtain displayed maximal values

§ meta-analysis contains samples also part of UKB

† median age of onset for continuous traits obtained from discretizing distribution by Kuan et al. or from surrogate diseased states (T2DM for Glucose; CKD for eGFR)
