# Supplementary material for: Human genetic analyses of organelles highlight the nucleus in age-related trait heritability
Source: eLife journal article supplement (doi:10.7554/elife.68610), 2021-09-01
Supplement: supp [file elife-68610-supp-v1.zip]

A.

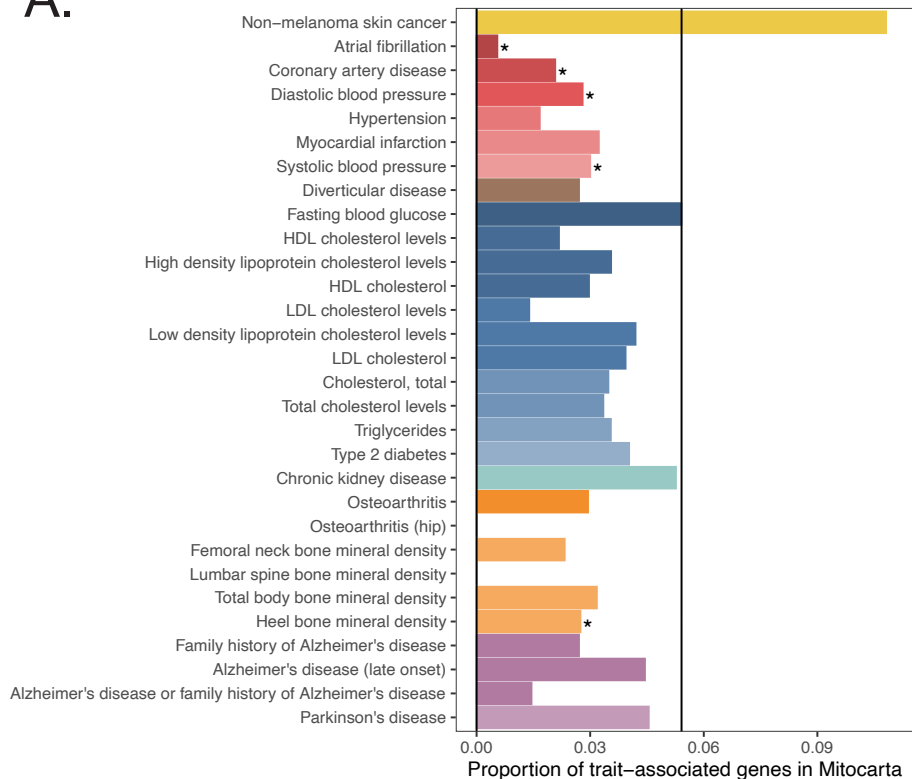

B.

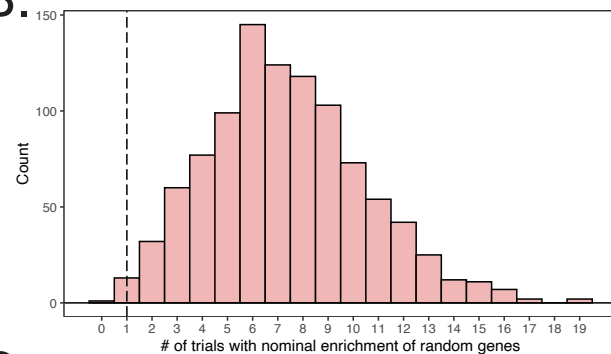

C.

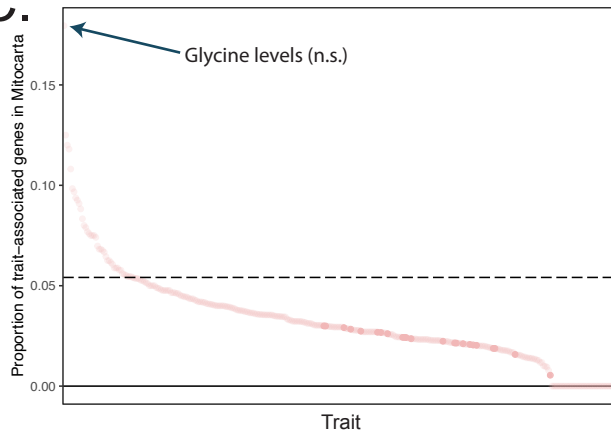

### Cancers

Primary Skin Malignancy

### Cardiovascular

Atrial Fibrillation  
Coronary Artery Disease  
Diastolic BP  
Hypertension  
Myocardial Infarction  
Systolic BP

### Digestive

Diverticular Disease

### Endocrine / Metabolic

Glucose  
HDL-C  
LDL-C  
Raised Total Cholesterol  
Triglycerides  
Type 2 Diabetes Mellitus

### Genitourinary

Chronic Kidney Disease

### Musculoskeletal

Osteoarthritis  
Osteoporosis/BMD

### Neurological

Alzheimer's Disease  
Parkinson's Disease
