# Supplementary material for: Human genetic analyses of organelles highlight the nucleus in age-related trait heritability
Source: eLife. 2021 Sep 1;10:e68610. doi: 10.7554/eLife.68610 (PMC8476128; doi:10.7554/eLife.68610)
Supplement: Supplementary file 2. [file elife-68610-supp2.xlsx]

## Sheet: Contents
	Supplementary File 2 for: Gupta et al. 2021
	Supplementary File 2a. QC calls assigned to mtDNA variants through manual review of cluster plots.
	Supplementary File 2b. Transcription factor assignment to broadly-expressed vs tissue-specific categories using two sub-region groupings.

## Sheet: Supplementary File 2a
Variant	Position	Clusterplot QC call
Affx-79504644	73	PASS
Affx-52321525	150	PASS
Affx-52321592	228	FAIL_OTV
Affx-34461939	235	PASS		Legend:
rs145412228	239	PASS_CONCERN_OTV		PASS	Variant passed visual QC with no concerns
Affx-34461957	263	PASS		PASS_CONCERN_OTV	Variant had potential off-target concerns, but not severe enough to fail
Affx-92047869	295	PASS		PASS_CONCERN_RES	Variant had potential concerns with resolution separating REF/ALT, but not severe enough to fail
Affx-79381653	456	PASS_CONCERN_RES		PASS_CONCERN_BATCH	Variant showed some differences in call rate from batch to batch, but not severe enough to fail
Affx-89025674	497	PASS_CONCERN_OTV		FAIL_OTV	Variant showed substantial apparent off-target effects or extremely strange intensity distributions
Affx-89025725	547	PASS		FAIL_RES	Variant showed poor resolution in discriminating REF/ALT
Affx-34462196	709	PASS		FAIL_BATCH	Variant showed substantial differences in call rate from batch to batch
Affx-79381656	750	PASS		FAIL_MISCLUST	Variant appeared to show misclustering
Affx-34462230	769	PASS
Affx-89025774	827	PASS		Note that variants may have failed AF thresholds while being listed as PASS here.
Affx-91439598	980	PASS		Also note that some variants were measured only on UK BiLEVE arrays (or UK Biobank Axiom array); variants were not flagged as CONCERN or FAIL based on this alone.
Affx-89025772	1018	PASS
Affx-79381657	1189	PASS_CONCERN_BATCH
Affx-34461684	1243	PASS
Affx-89025736	1391	PASS
Affx-89025696	1406	PASS
Affx-34461788	1438	PASS
Affx-89025706	1555	PASS
Affx-79381658	1719	PASS_CONCERN_RES
Affx-79443409	1721	PASS
Affx-79381659	1736	PASS
Affx-89025771	1811	PASS
Affx-34461927	2158	PASS
Affx-89025695	2218	PASS
Affx-34461942	2416	PASS
Affx-34461948	2483	PASS
Affx-34461959	2706	PASS
Affx-34461963	2758	PASS
Affx-34461972	2885	PASS
Affx-34461976	3010	PASS
Affx-79443412	3027	PASS
Affx-79381660	3197	PASS
Affx-89025759	3243	PASS
Affx-89025737	3308	PASS
Affx-89025707	3316	PASS
Affx-34461994	3348	PASS
Affx-34461996	3394	PASS
Affx-89025777	3395	PASS
Affx-89025676	3423	PASS
Affx-89025722	3460	PASS
Affx-79381661	3480	PASS
Affx-89025718	3531	PASS
Affx-89025741	3594	PASS
Affx-79443419	3645	FAIL_BATCH
Affx-79381662	3666	PASS
Affx-89025710	3697	PASS
Affx-79381663	3720	PASS
Affx-89025781	3733	PASS
Affx-89025762	3736	PASS_CONCERN_BATCH
Affx-89025739	3796	PASS
Affx-92047845	3834	PASS_CONCERN_BATCH
Affx-89025682	3866	FAIL_BATCH
Affx-79381664	3915	PASS
Affx-79381665	3918	PASS
Affx-92047846	3936	PASS
Affx-89025738	3946	PASS
Affx-89025729	3949	PASS
Affx-92047847	3990	PASS
Affx-79381667	3992	PASS
Affx-34462030	4024	PASS_CONCERN_RES
Affx-89025770	4093	PASS
Affx-89025723	4104	FAIL_RES
Affx-89025755	4160	PASS
Affx-89025668	4171	PASS
Affx-89025684	4216	PASS
Affx-89025714	4300	PASS
Affx-92047848	4310	PASS_CONCERN_BATCH
Affx-79381668	4336	PASS
Affx-92047849	4529	PASS
Affx-34462060	4561	PASS
Affx-34462062	4580	PASS
Affx-89025699	4639	PASS
Affx-79443430	4646	PASS
Affx-89025744	4715	FAIL_BATCH
Affx-34462075	4769	PASS
Affx-89025751	4793	PASS
Affx-79381669	4820	PASS
Affx-79381670	4824	PASS_CONCERN_RES
Affx-34462083	4883	PASS
Affx-79381671	4917	PASS
Affx-79381672	5004	PASS
Affx-34462094	5046	PASS
Affx-89025778	5147	PASS
Affx-89025691	5178	PASS
Affx-89025748	5231	PASS
Affx-34462105	5263	PASS
Affx-92047850	5360	PASS
Affx-79381673	5390	PASS
Affx-79381674	5442	FAIL_BATCH
Affx-79381676	5495	PASS
Affx-89025677	5633	PASS
Affx-34462122	5656	PASS
Affx-79381677	5773	PASS
Affx-34462135	5951	PASS
Affx-79443437	5999	PASS
Affx-79443438	6047	PASS
Affx-89025671	6185	PASS
Affx-79381678	6221	PASS
Affx-92047851	6253	PASS
Affx-89025742	6371	PASS
Affx-92047870	6386	PASS
Affx-86887358	6455	PASS
Affx-89025708	6528	PASS
Affx-34462179	6734	PASS
Affx-34462180	6752	PASS
Affx-34462182	6776	PASS
Affx-34462190	7028	PASS
Affx-34462191	7055	PASS
Affx-34462202	7175	PASS
Affx-89025713	7256	FAIL_RES
Affx-92047852	7276	PASS
Affx-79443447	7476	PASS
Affx-34462220	7521	PASS
Affx-92047871	7645	PASS
Affx-89025775	7657	PASS
Affx-79381679	7768	PASS
Affx-89025692	7864	PASS
Affx-89025740	8206	PASS
Affx-89025743	8251	FAIL_RES
Affx-89025766	8269	PASS_CONCERN_OTV
Affx-89025704	8344	PASS
Affx-92047859	8448	PASS
Affx-79381680	8616	PASS
Affx-92047860	8655	FAIL_RES
Affx-89025732	8697	PASS
Affx-34462282	8869	FAIL_BATCH
Affx-89025719	8993	PASS
Affx-89025749	8994	PASS
Affx-34462293	9042	PASS
Affx-89025685	9055	PASS
Affx-34462296	9072	PASS
Affx-34462299	9093	PASS
Affx-92047864	9123	PASS
Affx-89025773	9221	PASS
Affx-79381681	9377	PASS_CONCERN_BATCH
Affx-89025765	9477	PASS
Affx-89025758	9647	PASS
Affx-79381683	9667	PASS
Affx-79381684	9698	FAIL_OTV
Affx-34462338	9716	PASS
Affx-79381685	9899	PASS
Affx-79381686	9950	PASS
Affx-34461570	10044	PASS
Affx-92047861	10142	FAIL_OTV
Affx-92047862	10217	PASS
Affx-79381687	10238	PASS
Affx-79381688	10310	PASS
Affx-79381689	10321	FAIL_BATCH
Affx-92047863	10394	PASS
Affx-79381690	10398	PASS_CONCERN_OTV
Affx-89025669	10400	PASS
Affx-79381691	10463	PASS
Affx-34461593	10550	PASS
Affx-34461600	10688	FAIL_MISCLUST
Affx-86886451	10810	PASS
Affx-89025678	10819	PASS
Affx-89025752	10822	FAIL_BATCH
Affx-79381693	10873	PASS
Affx-79381694	10915	PASS
Affx-89025768	11025	PASS
Affx-34461623	11251	PASS_CONCERN_OTV
Affx-89025753	11299	PASS
Affx-92047873	11332	PASS
Affx-79381695	11377	PASS
Affx-79381696	11467	PASS_CONCERN_OTV
Affx-89025734	11485	PASS
Affx-89025715	11674	PASS
Affx-89025673	11719	PASS
Affx-89025779	11778	PASS_CONCERN_BATCH
Affx-34461648	11812	PASS
Affx-79381697	11899	PASS
Affx-34461653	11914	PASS
Affx-92047855	11947	PASS
Affx-79381698	12308	PASS
Affx-34461680	12372	PASS
Affx-89025681	12397	PASS
Affx-89025686	12406	PASS_CONCERN_OTV
Affx-86886472	12501	PASS
Affx-34461691	12612	PASS
Affx-79381699	12630	PASS
Affx-89025731	12633	PASS
Affx-34461695	12669	PASS
Affx-79381700	12705	PASS
Affx-89025760	12810	PASS
Affx-79381701	12850	PASS
Affx-89025712	12879	PASS
Affx-89025701	12950	PASS
Affx-92047856	13020	PASS
Affx-92047857	13101	PASS
Affx-52321475	13104	PASS
Affx-34461715	13105	PASS
Affx-89025747	13117	PASS
Affx-79381702	13263	PASS
Affx-89025728	13500	PASS
Affx-89025716	13506	PASS
Affx-89025711	13617	PASS
Affx-79381703	13650	PASS
Affx-34461745	13708	PASS_CONCERN_OTV
Affx-79443499	13759	PASS_CONCERN_OTV
Affx-79381704	13780	PASS
Affx-34461750	13789	PASS
Affx-89025700	13879	PASS_CONCERN_RES
Affx-79381705	13965	PASS
Affx-34461763	13966	PASS
Affx-89025754	14016	PASS
Affx-92047858	14070	PASS
Affx-92047868	14094	PASS
Affx-79443502	14133	PASS
Affx-92047853	14139	PASS
Affx-89025746	14167	PASS
Affx-79381706	14178	PASS
Affx-79381707	14233	PASS
Affx-86496743	14318	PASS
Affx-89025717	14484	PASS
Affx-89025780	14550	PASS
Affx-92047872	14552	PASS
Affx-79381708	14582	PASS_CONCERN_RES
Affx-92047865	14620	PASS
Affx-89025675	14674	PASS
Affx-89025679	14766	PASS
Affx-89025687	14793	PASS
Affx-34461803	14798	PASS
Affx-92047866	14869	FAIL_OTV
Affx-79443511	14872	PASS
Affx-34461806	14905	PASS
Affx-79381709	15043	PASS
Affx-92047867	15148	FAIL_RES
Affx-89025745	15218	PASS
Affx-89025761	15244	PASS
Affx-89025726	15250	PASS
Affx-79381710	15257	PASS
Affx-79381711	15301	PASS
Affx-34461828	15452	PASS
Affx-92047874	15454	PASS
Affx-34461832	15535	PASS_CONCERN_BATCH
Affx-89025690	15693	PASS
Affx-34461837	15758	PASS
Affx-79381713	15784	PASS
Affx-89025698	15812	PASS
Affx-79381714	15833	PASS
Affx-89025667	15884	PASS
Affx-79381715	15924	PASS_CONCERN_OTV
Affx-79381716	15928	PASS
Affx-79381717	15930	PASS
Affx-89025694	15946	PASS
Affx-79381719	16144	PASS_CONCERN_OTV
Affx-79381720	16145	PASS_CONCERN_RES
Affx-79381721	16148	PASS_CONCERN_OTV
Affx-34461862	16153	PASS
Affx-34461864	16162	PASS
Affx-89025721	16172	FAIL_RES
Affx-89025703	16193	PASS
Affx-89025702	16223	PASS
Affx-89025720	16243	FAIL_BATCH
Affx-79381724	16270	PASS_CONCERN_OTV
Affx-79443528	16298	PASS
Affx-92047842	16337	PASS
Affx-79443531	16356	PASS
Affx-79443532	16362	PASS_CONCERN_RES
Affx-89025709	16390	PASS
Affx-79381726	16391	PASS_CONCERN_OTV

## Sheet: Supplementary File 2b
Primary GTEx tissue parametrization (brain cortex, artery coronary, esophagus mucosa, skin not sun exposed (suprapubic), colon sigmoid, and adispose visceral (omentum))						Seconday GTEx tissue parametrization (brain frontal cortex (ba9), artery tibial, esophagus muscularis, skin sun exposed (lower leg), colon transverse, and adipose subcutaneous)
Broadly expressed			Tissue specific			Broadly expressed			Tissue specific
gene	id		gene	id		gene	id		gene	id
TFAP2E	ENSG00000116819		TFAP2A	ENSG00000137203		TFAP2E	ENSG00000116819		TFAP2A	ENSG00000137203
ARID3A	ENSG00000116017		TFAP2B	ENSG00000008196		ARID3A	ENSG00000116017		TFAP2B	ENSG00000008196
ARID5A	ENSG00000196843		TFAP2C	ENSG00000087510		ARID5A	ENSG00000196843		TFAP2C	ENSG00000087510
ARID5B	ENSG00000150347		ARID3B	ENSG00000179361		ARID5B	ENSG00000150347		ARID3B	ENSG00000179361
ARID2	ENSG00000189079		ARID3C	ENSG00000205143		ARID2	ENSG00000189079		ARID3C	ENSG00000205143
AHCTF1	ENSG00000153207		KDM5B	ENSG00000117139		AHCTF1	ENSG00000153207		KDM5B	ENSG00000117139
AHDC1	ENSG00000126705		AKNA	ENSG00000106948		AHDC1	ENSG00000126705		AKNA	ENSG00000106948
ASH1L	ENSG00000116539		CBX2	ENSG00000173894		ASH1L	ENSG00000116539		CBX2	ENSG00000173894
DNTTIP1	ENSG00000101457		DOT1L	ENSG00000104885		DNTTIP1	ENSG00000101457		DOT1L	ENSG00000104885
GLYR1	ENSG00000140632		HMGA1	ENSG00000137309		GLYR1	ENSG00000140632		HMGA2	ENSG00000149948
PHF20	ENSG00000025293		HMGA2	ENSG00000149948		HMGA1	ENSG00000137309		SCML4	ENSG00000146285
PHF21A	ENSG00000135365		SCML4	ENSG00000146285		PHF20	ENSG00000025293		ZBED2	ENSG00000177494
PRR12	ENSG00000126464		ZBED2	ENSG00000177494		PHF21A	ENSG00000135365		ZBED9	ENSG00000232040
SETBP1	ENSG00000152217		ZBED9	ENSG00000232040		PRR12	ENSG00000126464		AHR	ENSG00000106546
SRCAP	ENSG00000080603		AHR	ENSG00000106546		SETBP1	ENSG00000152217		AHRR	ENSG00000063438
FAM200B	ENSG00000237765		AHRR	ENSG00000063438		SRCAP	ENSG00000080603		ARNT2	ENSG00000172379
ZBED3	ENSG00000132846		ARNT2	ENSG00000172379		FAM200B	ENSG00000237765		ARNTL2	ENSG00000029153
ZBED4	ENSG00000100426		ARNTL2	ENSG00000029153		ZBED3	ENSG00000132846		ASCL1	ENSG00000139352
ZBED5	ENSG00000236287		ASCL1	ENSG00000139352		ZBED4	ENSG00000100426		ASCL2	ENSG00000183734
ZBED6	ENSG00000257315		ASCL2	ENSG00000183734		ZBED5	ENSG00000236287		ASCL3	ENSG00000176009
ARNT	ENSG00000143437		ASCL3	ENSG00000176009		ZBED6	ENSG00000257315		ASCL5	ENSG00000232237
ARNTL	ENSG00000133794		ASCL5	ENSG00000232237		ARNT	ENSG00000143437		ATOH1	ENSG00000172238
BHLHE40	ENSG00000134107		ATOH1	ENSG00000172238		ARNTL	ENSG00000133794		ATOH7	ENSG00000179774
BHLHE41	ENSG00000123095		ATOH7	ENSG00000179774		ATOH8	ENSG00000168874		BHLHA15	ENSG00000180535
CLOCK	ENSG00000134852		ATOH8	ENSG00000168874		BHLHE40	ENSG00000134107		BHLHA9	ENSG00000205899
HES1	ENSG00000114315		BHLHA15	ENSG00000180535		BHLHE41	ENSG00000123095		BHLHE22	ENSG00000180828
HES4	ENSG00000188290		BHLHA9	ENSG00000205899		CLOCK	ENSG00000134852		EPAS1	ENSG00000116016
HES7	ENSG00000179111		BHLHE22	ENSG00000180828		HES1	ENSG00000114315		HAND1	ENSG00000113196
HEY1	ENSG00000164683		EPAS1	ENSG00000116016		HES7	ENSG00000179111		HAND2	ENSG00000164107
HIF1A	ENSG00000100644		HAND1	ENSG00000113196		HEY1	ENSG00000164683		HELT	ENSG00000187821
HIF3A	ENSG00000124440		HAND2	ENSG00000164107		HIF1A	ENSG00000100644		HES2	ENSG00000069812
MAX	ENSG00000125952		HELT	ENSG00000187821		HIF3A	ENSG00000124440		HES4	ENSG00000188290
MLX	ENSG00000108788		HES2	ENSG00000069812		MAX	ENSG00000125952		HES5	ENSG00000197921
MLXIP	ENSG00000175727		HES5	ENSG00000197921		MLX	ENSG00000108788		HES6	ENSG00000144485
MNT	ENSG00000070444		HES6	ENSG00000144485		MLXIP	ENSG00000175727		HEY2	ENSG00000135547
MXD3	ENSG00000213347		HEY2	ENSG00000135547		MNT	ENSG00000070444		HEYL	ENSG00000163909
MXD4	ENSG00000123933		HEYL	ENSG00000163909		MSC	ENSG00000178860		LYL1	ENSG00000104903
MXI1	ENSG00000119950		LYL1	ENSG00000104903		MXD3	ENSG00000213347		MESP1	ENSG00000166823
NCOA1	ENSG00000084676		MESP1	ENSG00000166823		MXD4	ENSG00000123933		MESP2	ENSG00000188095
NCOA2	ENSG00000140396		MESP2	ENSG00000188095		MXI1	ENSG00000119950		MITF	ENSG00000187098
NCOA3	ENSG00000124151		MITF	ENSG00000187098		NCOA1	ENSG00000084676		MLXIPL	ENSG00000009950
NHLH1	ENSG00000171786		MLXIPL	ENSG00000009950		NCOA2	ENSG00000140396		MXD1	ENSG00000059728
NPAS2	ENSG00000170485		MSC	ENSG00000178860		NCOA3	ENSG00000124151		MYC	ENSG00000136997
SREBF2	ENSG00000198911		MXD1	ENSG00000059728		NHLH1	ENSG00000171786		MYCL	ENSG00000116990
TCF12	ENSG00000140262		MYC	ENSG00000136997		NPAS2	ENSG00000170485		MYCN	ENSG00000134323
TCF3	ENSG00000071564		MYCL	ENSG00000116990		SREBF2	ENSG00000198911		MYF5	ENSG00000111049
TCF4	ENSG00000196628		MYCN	ENSG00000134323		TCF12	ENSG00000140262		MYF6	ENSG00000111046
TFAP4	ENSG00000090447		MYF5	ENSG00000111049		TCF15	ENSG00000125878		MYOD1	ENSG00000129152
TFEB	ENSG00000112561		MYF6	ENSG00000111046		TCF3	ENSG00000071564		MYOG	ENSG00000122180
USF1	ENSG00000158773		MYOD1	ENSG00000129152		TCF4	ENSG00000196628		NEUROD1	ENSG00000162992
USF2	ENSG00000105698		MYOG	ENSG00000122180		TFAP4	ENSG00000090447		NEUROD2	ENSG00000171532
POGK	ENSG00000143157		NEUROD1	ENSG00000162992		TFEB	ENSG00000112561		NEUROD4	ENSG00000123307
ATF1	ENSG00000123268		NEUROD2	ENSG00000171532		USF1	ENSG00000158773		NEUROD6	ENSG00000164600
ATF2	ENSG00000115966		NEUROD4	ENSG00000123307		USF2	ENSG00000105698		NEUROG2	ENSG00000178403
ATF4	ENSG00000128272		NEUROD6	ENSG00000164600		POGK	ENSG00000143157		NEUROG3	ENSG00000122859
ATF6	ENSG00000118217		NEUROG2	ENSG00000178403		ATF1	ENSG00000123268		NPAS1	ENSG00000130751
ATF6B	ENSG00000213676		NEUROG3	ENSG00000122859		ATF2	ENSG00000115966		NPAS3	ENSG00000151322
ATF7	ENSG00000170653		NHLH2	ENSG00000177551		ATF3	ENSG00000162772		NPAS4	ENSG00000174576
BACH1	ENSG00000156273		NPAS1	ENSG00000130751		ATF4	ENSG00000128272		OLIG1	ENSG00000184221
BACH2	ENSG00000112182		NPAS3	ENSG00000151322		ATF6	ENSG00000118217		OLIG2	ENSG00000205927
CEBPB	ENSG00000172216		NPAS4	ENSG00000174576		ATF6B	ENSG00000213676		PTF1A	ENSG00000168267
CEBPD	ENSG00000221869		OLIG1	ENSG00000184221		ATF7	ENSG00000170653		SIM1	ENSG00000112246
CEBPG	ENSG00000153879		OLIG2	ENSG00000205927		BACH1	ENSG00000156273		SIM2	ENSG00000159263
CREB1	ENSG00000118260		PTF1A	ENSG00000168267		BACH2	ENSG00000112182		SOHLH1	ENSG00000165643
CREB3	ENSG00000107175		SIM1	ENSG00000112246		CEBPB	ENSG00000172216		SOHLH2	ENSG00000120669
CREB3L2	ENSG00000182158		SIM2	ENSG00000159263		CEBPD	ENSG00000221869		TAL1	ENSG00000162367
CREBL2	ENSG00000111269		SOHLH1	ENSG00000165643		CEBPG	ENSG00000153879		TCF21	ENSG00000118526
CREBZF	ENSG00000137504		SOHLH2	ENSG00000120669		CREB1	ENSG00000118260		TCF23	ENSG00000163792
DBP	ENSG00000105516		TAL1	ENSG00000162367		CREB3	ENSG00000107175		TCF24	ENSG00000261787
DDIT3	ENSG00000175197		TCF15	ENSG00000125878		CREB3L2	ENSG00000182158		TCFL5	ENSG00000101190
FOSL2	ENSG00000075426		TCF21	ENSG00000118526		CREBL2	ENSG00000111269		TFEC	ENSG00000105967
HLF	ENSG00000108924		TCF23	ENSG00000163792		CREBZF	ENSG00000137504		TWIST1	ENSG00000122691
JDP2	ENSG00000140044		TCF24	ENSG00000261787		DBP	ENSG00000105516		TWIST2	ENSG00000233608
JUN	ENSG00000177606		TCFL5	ENSG00000101190		DDIT3	ENSG00000175197		ATF5	ENSG00000169136
JUNB	ENSG00000171223		TFEC	ENSG00000105967		FOSL2	ENSG00000075426		BATF	ENSG00000156127
JUND	ENSG00000130522		TWIST1	ENSG00000122691		JDP2	ENSG00000140044		BATF2	ENSG00000168062
MAF	ENSG00000178573		TWIST2	ENSG00000233608		JUN	ENSG00000177606		BATF3	ENSG00000123685
MAFF	ENSG00000185022		ATF3	ENSG00000162772		JUND	ENSG00000130522		CEBPA	ENSG00000245848
MAFG	ENSG00000197063		ATF5	ENSG00000169136		MAF	ENSG00000178573		CEBPE	ENSG00000092067
MAFK	ENSG00000198517		BATF	ENSG00000156127		MAFF	ENSG00000185022		CREB3L1	ENSG00000157613
NFE2L2	ENSG00000116044		BATF2	ENSG00000168062		MAFG	ENSG00000197063		CREB3L3	ENSG00000060566
NFE2L3	ENSG00000050344		BATF3	ENSG00000123685		MAFK	ENSG00000198517		CREB3L4	ENSG00000143578
NFIL3	ENSG00000165030		CEBPA	ENSG00000245848		NFE2L2	ENSG00000116044		CREB5	ENSG00000146592
TEF	ENSG00000167074		CEBPE	ENSG00000092067		NFE2L3	ENSG00000050344		CREM	ENSG00000095794
AEBP2	ENSG00000139154		CREB3L1	ENSG00000157613		NFIL3	ENSG00000165030		FOS	ENSG00000170345
AKAP8	ENSG00000105127		CREB3L3	ENSG00000060566		TEF	ENSG00000167074		FOSB	ENSG00000125740
AKAP8L	ENSG00000011243		CREB3L4	ENSG00000143578		AEBP2	ENSG00000139154		FOSL1	ENSG00000175592
ANKZF1	ENSG00000163516		CREB5	ENSG00000146592		AKAP8	ENSG00000105127		HLF	ENSG00000108924
ATMIN	ENSG00000166454		CREM	ENSG00000095794		AKAP8L	ENSG00000011243		JUNB	ENSG00000171223
BCL6	ENSG00000113916		FOS	ENSG00000170345		ANKZF1	ENSG00000163516		MAFA	ENSG00000182759
CHAMP1	ENSG00000198824		FOSB	ENSG00000125740		ATMIN	ENSG00000166454		MAFB	ENSG00000204103
CTCF	ENSG00000102974		FOSL1	ENSG00000175592		BCL6	ENSG00000113916		NFE2	ENSG00000123405
DZIP1	ENSG00000134874		MAFA	ENSG00000182759		CHAMP1	ENSG00000198824		NFE2L1	ENSG00000082641
E4F1	ENSG00000167967		MAFB	ENSG00000204103		CTCF	ENSG00000102974		NRL	ENSG00000129535
FIZ1	ENSG00000179943		NFE2	ENSG00000123405		DZIP1	ENSG00000134874		BCL11A	ENSG00000119866
GLI3	ENSG00000106571		NFE2L1	ENSG00000082641		E4F1	ENSG00000167967		BCL11B	ENSG00000127152
GLI4	ENSG00000250571		NRL	ENSG00000129535		FIZ1	ENSG00000179943		BCL6B	ENSG00000161940
GLIS2	ENSG00000126603		BCL11A	ENSG00000119866		GLI3	ENSG00000106571		BNC1	ENSG00000169594
GTF3A	ENSG00000122034		BCL11B	ENSG00000127152		GLI4	ENSG00000250571		BNC2	ENSG00000173068
GZF1	ENSG00000125812		BCL6B	ENSG00000161940		GLIS2	ENSG00000126603		CASZ1	ENSG00000130940
HIC1	ENSG00000177374		BNC1	ENSG00000169594		GTF3A	ENSG00000122034		CTCFL	ENSG00000124092
HINFP	ENSG00000172273		BNC2	ENSG00000173068		GZF1	ENSG00000125812		DPF1	ENSG00000011332
HIVEP1	ENSG00000095951		CASZ1	ENSG00000130940		HIC1	ENSG00000177374		DPF3	ENSG00000205683
HIVEP2	ENSG00000010818		CTCFL	ENSG00000124092		HINFP	ENSG00000172273		EGR1	ENSG00000120738
HIVEP3	ENSG00000127124		DPF1	ENSG00000011332		HIVEP1	ENSG00000095951		EGR2	ENSG00000122877
IKZF4	ENSG00000123411		DPF3	ENSG00000205683		HIVEP2	ENSG00000010818		EGR3	ENSG00000179388
IKZF5	ENSG00000095574		EGR1	ENSG00000120738		HIVEP3	ENSG00000127124		EGR4	ENSG00000135625
JAZF1	ENSG00000153814		EGR2	ENSG00000122877		IKZF4	ENSG00000123411		FAM170A	ENSG00000164334
KAT7	ENSG00000136504		EGR3	ENSG00000179388		IKZF5	ENSG00000095574		FEZF1	ENSG00000128610
KIN	ENSG00000151657		EGR4	ENSG00000135625		KAT7	ENSG00000136504		FEZF2	ENSG00000153266
KLF10	ENSG00000155090		FAM170A	ENSG00000164334		KIN	ENSG00000151657		GFI1	ENSG00000162676
KLF11	ENSG00000172059		FEZF1	ENSG00000128610		KLF10	ENSG00000155090		GFI1B	ENSG00000165702
KLF12	ENSG00000118922		FEZF2	ENSG00000153266		KLF11	ENSG00000172059		GLI1	ENSG00000111087
KLF13	ENSG00000169926		GFI1	ENSG00000162676		KLF12	ENSG00000118922		GLI2	ENSG00000074047
KLF15	ENSG00000163884		GFI1B	ENSG00000165702		KLF13	ENSG00000169926		GLIS1	ENSG00000174332
KLF16	ENSG00000129911		GLI1	ENSG00000111087		KLF15	ENSG00000163884		GLIS3	ENSG00000107249
KLF2	ENSG00000127528		GLI2	ENSG00000074047		KLF16	ENSG00000129911		HIC2	ENSG00000169635
KLF3	ENSG00000109787		GLIS1	ENSG00000174332		KLF2	ENSG00000127528		IKZF1	ENSG00000185811
KLF6	ENSG00000067082		GLIS3	ENSG00000107249		KLF3	ENSG00000109787		IKZF2	ENSG00000030419
KLF7	ENSG00000118263		HIC2	ENSG00000169635		KLF6	ENSG00000067082		IKZF3	ENSG00000161405
KLF9	ENSG00000119138		IKZF1	ENSG00000185811		KLF7	ENSG00000118263		INSM1	ENSG00000173404
L3MBTL1	ENSG00000185513		IKZF2	ENSG00000030419		KLF9	ENSG00000119138		INSM2	ENSG00000168348
L3MBTL3	ENSG00000198945		IKZF3	ENSG00000161405		L3MBTL1	ENSG00000185513		JAZF1	ENSG00000153814
MAZ	ENSG00000103495		INSM1	ENSG00000173404		L3MBTL3	ENSG00000198945		KLF1	ENSG00000105610
MTF1	ENSG00000188786		INSM2	ENSG00000168348		MAZ	ENSG00000103495		KLF14	ENSG00000174595
MYNN	ENSG00000085274		KLF1	ENSG00000105610		MTF1	ENSG00000188786		KLF17	ENSG00000171872
MZF1	ENSG00000099326		KLF14	ENSG00000174595		MYNN	ENSG00000085274		KLF4	ENSG00000136826
PLAGL1	ENSG00000118495		KLF17	ENSG00000171872		MZF1	ENSG00000099326		KLF5	ENSG00000102554
PRDM10	ENSG00000170325		KLF4	ENSG00000136826		PLAGL1	ENSG00000118495		L3MBTL4	ENSG00000154655
PRDM15	ENSG00000141956		KLF5	ENSG00000102554		PRDM10	ENSG00000170325		MECOM	ENSG00000085276
PRDM2	ENSG00000116731		L3MBTL4	ENSG00000154655		PRDM15	ENSG00000141956		MYT1	ENSG00000196132
PRDM4	ENSG00000110851		MECOM	ENSG00000085276		PRDM2	ENSG00000116731		MYT1L	ENSG00000186487
PRDM5	ENSG00000138738		MYT1	ENSG00000196132		PRDM4	ENSG00000110851		OSR1	ENSG00000143867
RBAK	ENSG00000146587		MYT1L	ENSG00000186487		PRDM5	ENSG00000138738		OSR2	ENSG00000164920
REPIN1	ENSG00000214022		OSR1	ENSG00000143867		RBAK	ENSG00000146587		OVOL1	ENSG00000172818
REST	ENSG00000084093		OSR2	ENSG00000164920		REPIN1	ENSG00000214022		OVOL2	ENSG00000125850
RLF	ENSG00000117000		OVOL1	ENSG00000172818		REST	ENSG00000084093		OVOL3	ENSG00000105261
RREB1	ENSG00000124782		OVOL2	ENSG00000125850		RLF	ENSG00000117000		PEG3	ENSG00000198300
SALL2	ENSG00000165821		OVOL3	ENSG00000105261		RREB1	ENSG00000124782		PLAG1	ENSG00000181690
SLC2A4RG	ENSG00000125520		PEG3	ENSG00000198300		SALL2	ENSG00000165821		PLAGL2	ENSG00000126003
SNAI1	ENSG00000124216		PLAG1	ENSG00000181690		SLC2A4RG	ENSG00000125520		PRDM1	ENSG00000057657
SNAI2	ENSG00000019549		PLAGL2	ENSG00000126003		SNAI1	ENSG00000124216		PRDM16	ENSG00000142611
SP1	ENSG00000185591		PRDM1	ENSG00000057657		SNAI2	ENSG00000019549		PRDM6	ENSG00000061455
SP2	ENSG00000167182		PRDM16	ENSG00000142611		SP1	ENSG00000185591		PRDM8	ENSG00000152784
SP3	ENSG00000172845		PRDM6	ENSG00000061455		SP2	ENSG00000167182		PRDM9	ENSG00000164256
SP4	ENSG00000105866		PRDM8	ENSG00000152784		SP3	ENSG00000172845		SALL1	ENSG00000103449
TSHZ1	ENSG00000179981		PRDM9	ENSG00000164256		SP4	ENSG00000105866		SALL3	ENSG00000256463
TSHZ2	ENSG00000182463		SALL1	ENSG00000103449		TSHZ1	ENSG00000179981		SALL4	ENSG00000101115
VEZF1	ENSG00000136451		SALL3	ENSG00000256463		VEZF1	ENSG00000136451		SCRT1	ENSG00000170616
WIZ	ENSG00000011451		SALL4	ENSG00000101115		WIZ	ENSG00000011451		SCRT2	ENSG00000215397
YY1	ENSG00000100811		SCRT1	ENSG00000170616		YY1	ENSG00000100811		SNAI3	ENSG00000185669
ZBTB1	ENSG00000126804		SCRT2	ENSG00000215397		ZBTB1	ENSG00000126804		SP5	ENSG00000204335
ZBTB10	ENSG00000205189		SNAI3	ENSG00000185669		ZBTB10	ENSG00000205189		SP6	ENSG00000189120
ZBTB11	ENSG00000066422		SP5	ENSG00000204335		ZBTB11	ENSG00000066422		SP7	ENSG00000170374
ZBTB12	ENSG00000204366		SP6	ENSG00000189120		ZBTB12	ENSG00000204366		SP8	ENSG00000164651
ZBTB14	ENSG00000198081		SP7	ENSG00000170374		ZBTB14	ENSG00000198081		SP9	ENSG00000217236
ZBTB16	ENSG00000109906		SP8	ENSG00000164651		ZBTB16	ENSG00000109906		ST18	ENSG00000147488
ZBTB17	ENSG00000116809		SP9	ENSG00000217236		ZBTB17	ENSG00000116809		TSHZ2	ENSG00000182463
ZBTB18	ENSG00000179456		ST18	ENSG00000147488		ZBTB2	ENSG00000181472		TSHZ3	ENSG00000121297
ZBTB2	ENSG00000181472		TSHZ3	ENSG00000121297		ZBTB21	ENSG00000173276		WT1	ENSG00000184937
ZBTB21	ENSG00000173276		WT1	ENSG00000184937		ZBTB22	ENSG00000236104		ZBTB18	ENSG00000179456
ZBTB22	ENSG00000236104		ZBTB20	ENSG00000181722		ZBTB25	ENSG00000089775		ZBTB20	ENSG00000181722
ZBTB25	ENSG00000089775		ZBTB32	ENSG00000011590		ZBTB26	ENSG00000171448		ZBTB32	ENSG00000011590
ZBTB26	ENSG00000171448		ZBTB7C	ENSG00000184828		ZBTB3	ENSG00000185670		ZBTB7B	ENSG00000160685
ZBTB3	ENSG00000185670		ZBTB8B	ENSG00000273274		ZBTB34	ENSG00000177125		ZBTB7C	ENSG00000184828
ZBTB34	ENSG00000177125		ZFP42	ENSG00000179059		ZBTB37	ENSG00000185278		ZBTB8B	ENSG00000273274
ZBTB37	ENSG00000185278		ZFP57	ENSG00000204644		ZBTB38	ENSG00000177311		ZFP42	ENSG00000179059
ZBTB38	ENSG00000177311		ZFPM2	ENSG00000169946		ZBTB39	ENSG00000166860		ZFP57	ENSG00000204644
ZBTB39	ENSG00000166860		ZIC1	ENSG00000152977		ZBTB4	ENSG00000174282		ZFPM2	ENSG00000169946
ZBTB4	ENSG00000174282		ZIC2	ENSG00000043355		ZBTB40	ENSG00000184677		ZIC1	ENSG00000152977
ZBTB40	ENSG00000184677		ZIC4	ENSG00000174963		ZBTB41	ENSG00000177888		ZIC2	ENSG00000043355
ZBTB41	ENSG00000177888		ZIC5	ENSG00000139800		ZBTB42	ENSG00000179627		ZIC4	ENSG00000174963
ZBTB42	ENSG00000179627		ZIM2	ENSG00000269699		ZBTB43	ENSG00000169155		ZIC5	ENSG00000139800
ZBTB43	ENSG00000169155		ZIM3	ENSG00000141946		ZBTB44	ENSG00000196323		ZIM2	ENSG00000269699
ZBTB44	ENSG00000196323		ZKSCAN2	ENSG00000155592		ZBTB45	ENSG00000119574		ZIM3	ENSG00000141946
ZBTB45	ENSG00000119574		ZKSCAN4	ENSG00000187626		ZBTB46	ENSG00000130584		ZKSCAN2	ENSG00000155592
ZBTB46	ENSG00000130584		ZMAT4	ENSG00000165061		ZBTB47	ENSG00000114853		ZKSCAN4	ENSG00000187626
ZBTB47	ENSG00000114853		ZNF10	ENSG00000256223		ZBTB48	ENSG00000204859		ZMAT4	ENSG00000165061
ZBTB48	ENSG00000204859		ZNF114	ENSG00000178150		ZBTB49	ENSG00000168826		ZNF10	ENSG00000256223
ZBTB49	ENSG00000168826		ZNF124	ENSG00000196418		ZBTB5	ENSG00000168795		ZNF114	ENSG00000178150
ZBTB5	ENSG00000168795		ZNF154	ENSG00000179909		ZBTB6	ENSG00000186130		ZNF124	ENSG00000196418
ZBTB6	ENSG00000186130		ZNF165	ENSG00000197279		ZBTB7A	ENSG00000178951		ZNF154	ENSG00000179909
ZBTB7A	ENSG00000178951		ZNF177	ENSG00000188629		ZBTB8A	ENSG00000160062		ZNF165	ENSG00000197279
ZBTB7B	ENSG00000160685		ZNF19	ENSG00000157429		ZFAT	ENSG00000066827		ZNF177	ENSG00000188629
ZBTB8A	ENSG00000160062		ZNF20	ENSG00000132010		ZFP1	ENSG00000184517		ZNF19	ENSG00000157429
ZFAT	ENSG00000066827		ZNF200	ENSG00000010539		ZFP14	ENSG00000142065		ZNF20	ENSG00000132010
ZFP1	ENSG00000184517		ZNF213	ENSG00000085644		ZFP2	ENSG00000198939		ZNF200	ENSG00000010539
ZFP14	ENSG00000142065		ZNF233	ENSG00000159915		ZFP28	ENSG00000196867		ZNF213	ENSG00000085644
ZFP2	ENSG00000198939		ZNF257	ENSG00000197134		ZFP3	ENSG00000180787		ZNF233	ENSG00000159915
ZFP28	ENSG00000196867		ZNF273	ENSG00000198039		ZFP30	ENSG00000120784		ZNF257	ENSG00000197134
ZFP3	ENSG00000180787		ZNF280A	ENSG00000169548		ZFP37	ENSG00000136866		ZNF273	ENSG00000198039
ZFP30	ENSG00000120784		ZNF280B	ENSG00000198477		ZFP62	ENSG00000196670		ZNF280A	ENSG00000169548
ZFP37	ENSG00000136866		ZNF296	ENSG00000170684		ZFP64	ENSG00000020256		ZNF280B	ENSG00000198477
ZFP62	ENSG00000196670		ZNF311	ENSG00000197935		ZFP69	ENSG00000187815		ZNF311	ENSG00000197935
ZFP64	ENSG00000020256		ZNF331	ENSG00000130844		ZFP69B	ENSG00000187801		ZNF367	ENSG00000165244
ZFP69	ENSG00000187815		ZNF367	ENSG00000165244		ZFP82	ENSG00000181007		ZNF382	ENSG00000161298
ZFP69B	ENSG00000187801		ZNF382	ENSG00000161298		ZFP90	ENSG00000184939		ZNF385A	ENSG00000161642
ZFP82	ENSG00000181007		ZNF385A	ENSG00000161642		ZFP91	ENSG00000186660		ZNF385C	ENSG00000187595
ZFP90	ENSG00000184939		ZNF385C	ENSG00000187595		ZFPM1	ENSG00000179588		ZNF404	ENSG00000176222
ZFP91	ENSG00000186660		ZNF385D	ENSG00000151789		ZIK1	ENSG00000171649		ZNF415	ENSG00000170954
ZFPM1	ENSG00000179588		ZNF396	ENSG00000186496		ZKSCAN1	ENSG00000106261		ZNF433	ENSG00000197647
ZIK1	ENSG00000171649		ZNF404	ENSG00000176222		ZKSCAN3	ENSG00000189298		ZNF467	ENSG00000181444
ZKSCAN1	ENSG00000106261		ZNF415	ENSG00000170954		ZKSCAN5	ENSG00000196652		ZNF469	ENSG00000225614
ZKSCAN3	ENSG00000189298		ZNF433	ENSG00000197647		ZKSCAN7	ENSG00000196345		ZNF473	ENSG00000142528
ZKSCAN5	ENSG00000196652		ZNF467	ENSG00000181444		ZKSCAN8	ENSG00000198315		ZNF474	ENSG00000164185
ZKSCAN7	ENSG00000196345		ZNF469	ENSG00000225614		ZNF100	ENSG00000197020		ZNF479	ENSG00000185177
ZKSCAN8	ENSG00000198315		ZNF473	ENSG00000142528		ZNF101	ENSG00000181896		ZNF483	ENSG00000173258
ZNF100	ENSG00000197020		ZNF474	ENSG00000164185		ZNF107	ENSG00000196247		ZNF486	ENSG00000256229
ZNF101	ENSG00000181896		ZNF479	ENSG00000185177		ZNF112	ENSG00000062370		ZNF487	ENSG00000243660
ZNF107	ENSG00000196247		ZNF483	ENSG00000173258		ZNF117	ENSG00000152926		ZNF488	ENSG00000165388
ZNF112	ENSG00000062370		ZNF486	ENSG00000256229		ZNF12	ENSG00000164631		ZNF492	ENSG00000229676
ZNF117	ENSG00000152926		ZNF487	ENSG00000243660		ZNF121	ENSG00000197961		ZNF534	ENSG00000198633
ZNF12	ENSG00000164631		ZNF488	ENSG00000165388		ZNF131	ENSG00000172262		ZNF536	ENSG00000198597
ZNF121	ENSG00000197961		ZNF492	ENSG00000229676		ZNF132	ENSG00000131849		ZNF540	ENSG00000171817
ZNF131	ENSG00000172262		ZNF516	ENSG00000101493		ZNF133	ENSG00000125846		ZNF546	ENSG00000187187
ZNF132	ENSG00000131849		ZNF534	ENSG00000198633		ZNF134	ENSG00000213762		ZNF555	ENSG00000186300
ZNF133	ENSG00000125846		ZNF536	ENSG00000198597		ZNF135	ENSG00000176293		ZNF556	ENSG00000172000
ZNF134	ENSG00000213762		ZNF540	ENSG00000171817		ZNF136	ENSG00000196646		ZNF560	ENSG00000198028
ZNF135	ENSG00000176293		ZNF546	ENSG00000187187		ZNF138	ENSG00000197008		ZNF563	ENSG00000188868
ZNF136	ENSG00000196646		ZNF555	ENSG00000186300		ZNF14	ENSG00000105708		ZNF569	ENSG00000196437
ZNF138	ENSG00000197008		ZNF556	ENSG00000172000		ZNF140	ENSG00000196387		ZNF57	ENSG00000171970
ZNF14	ENSG00000105708		ZNF560	ENSG00000198028		ZNF141	ENSG00000131127		ZNF572	ENSG00000180938
ZNF140	ENSG00000196387		ZNF563	ENSG00000188868		ZNF142	ENSG00000115568		ZNF573	ENSG00000189144
ZNF141	ENSG00000131127		ZNF569	ENSG00000196437		ZNF143	ENSG00000166478		ZNF574	ENSG00000105732
ZNF142	ENSG00000115568		ZNF57	ENSG00000171970		ZNF146	ENSG00000167635		ZNF578	ENSG00000258405
ZNF143	ENSG00000166478		ZNF572	ENSG00000180938		ZNF148	ENSG00000163848		ZNF610	ENSG00000167554
ZNF146	ENSG00000167635		ZNF573	ENSG00000189144		ZNF155	ENSG00000204920		ZNF624	ENSG00000197566
ZNF148	ENSG00000163848		ZNF574	ENSG00000105732		ZNF16	ENSG00000170631		ZNF628	ENSG00000197483
ZNF155	ENSG00000204920		ZNF578	ENSG00000258405		ZNF160	ENSG00000170949		ZNF646	ENSG00000167395
ZNF16	ENSG00000170631		ZNF610	ENSG00000167554		ZNF169	ENSG00000175787		ZNF648	ENSG00000179930
ZNF160	ENSG00000170949		ZNF624	ENSG00000197566		ZNF17	ENSG00000186272		ZNF66	ENSG00000160229
ZNF169	ENSG00000175787		ZNF628	ENSG00000197483		ZNF174	ENSG00000103343		ZNF667	ENSG00000198046
ZNF17	ENSG00000186272		ZNF646	ENSG00000167395		ZNF175	ENSG00000105497		ZNF676	ENSG00000196109
ZNF174	ENSG00000103343		ZNF648	ENSG00000179930		ZNF18	ENSG00000154957		ZNF677	ENSG00000197928
ZNF175	ENSG00000105497		ZNF66	ENSG00000160229		ZNF180	ENSG00000167384		ZNF679	ENSG00000197123
ZNF18	ENSG00000154957		ZNF667	ENSG00000198046		ZNF181	ENSG00000197841		ZNF683	ENSG00000176083
ZNF180	ENSG00000167384		ZNF676	ENSG00000196109		ZNF184	ENSG00000096654		ZNF689	ENSG00000156853
ZNF181	ENSG00000197841		ZNF677	ENSG00000197928		ZNF189	ENSG00000136870		ZNF695	ENSG00000197472
ZNF184	ENSG00000096654		ZNF679	ENSG00000197123		ZNF195	ENSG00000005801		ZNF705A	ENSG00000196946
ZNF189	ENSG00000136870		ZNF683	ENSG00000176083		ZNF197	ENSG00000186448		ZNF705G	ENSG00000215372
ZNF195	ENSG00000005801		ZNF689	ENSG00000156853		ZNF2	ENSG00000163067		ZNF713	ENSG00000178665
ZNF197	ENSG00000186448		ZNF695	ENSG00000197472		ZNF202	ENSG00000166261		ZNF714	ENSG00000160352
ZNF2	ENSG00000163067		ZNF705A	ENSG00000196946		ZNF205	ENSG00000122386		ZNF729	ENSG00000196350
ZNF202	ENSG00000166261		ZNF705G	ENSG00000215372		ZNF207	ENSG00000010244		ZNF730	ENSG00000183850
ZNF205	ENSG00000122386		ZNF713	ENSG00000178665		ZNF208	ENSG00000160321		ZNF732	ENSG00000186777
ZNF207	ENSG00000010244		ZNF714	ENSG00000160352		ZNF211	ENSG00000121417		ZNF750	ENSG00000141579
ZNF208	ENSG00000160321		ZNF729	ENSG00000196350		ZNF212	ENSG00000170260		ZNF80	ENSG00000174255
ZNF211	ENSG00000121417		ZNF730	ENSG00000183850		ZNF214	ENSG00000149050		ZNF804A	ENSG00000170396
ZNF212	ENSG00000170260		ZNF732	ENSG00000186777		ZNF215	ENSG00000149054		ZNF804B	ENSG00000182348
ZNF214	ENSG00000149050		ZNF750	ENSG00000141579		ZNF217	ENSG00000171940		ZNF821	ENSG00000102984
ZNF215	ENSG00000149054		ZNF80	ENSG00000174255		ZNF219	ENSG00000165804		ZNF829	ENSG00000185869
ZNF217	ENSG00000171940		ZNF804A	ENSG00000170396		ZNF22	ENSG00000165512		ZNF831	ENSG00000124203
ZNF219	ENSG00000165804		ZNF804B	ENSG00000182348		ZNF221	ENSG00000159905		ZNF85	ENSG00000105750
ZNF22	ENSG00000165512		ZNF821	ENSG00000102984		ZNF222	ENSG00000159885		ZNF878	ENSG00000257446
ZNF221	ENSG00000159905		ZNF829	ENSG00000185869		ZNF223	ENSG00000178386		ZNF90	ENSG00000213988
ZNF222	ENSG00000159885		ZNF831	ENSG00000124203		ZNF224	ENSG00000267680		ZNF98	ENSG00000197360
ZNF223	ENSG00000178386		ZNF85	ENSG00000105750		ZNF225	ENSG00000256294		ZNF99	ENSG00000213973
ZNF224	ENSG00000267680		ZNF878	ENSG00000257446		ZNF226	ENSG00000167380		ZSCAN1	ENSG00000152467
ZNF225	ENSG00000256294		ZNF90	ENSG00000213988		ZNF227	ENSG00000131115		ZSCAN4	ENSG00000180532
ZNF226	ENSG00000167380		ZNF98	ENSG00000197360		ZNF229	ENSG00000167383		ZSCAN5A	ENSG00000131848
ZNF227	ENSG00000131115		ZNF99	ENSG00000213973		ZNF230	ENSG00000159882		ZSCAN5B	ENSG00000197213
ZNF229	ENSG00000167383		ZSCAN1	ENSG00000152467		ZNF232	ENSG00000167840		ZNF653	ENSG00000161914
ZNF230	ENSG00000159882		ZSCAN4	ENSG00000180532		ZNF234	ENSG00000263002		ZFHX3	ENSG00000140836
ZNF232	ENSG00000167840		ZSCAN5A	ENSG00000131848		ZNF235	ENSG00000159917		ZNF541	ENSG00000118156
ZNF234	ENSG00000263002		ZSCAN5B	ENSG00000197213		ZNF236	ENSG00000130856		TIGD3	ENSG00000173825
ZNF235	ENSG00000159917		ZNF653	ENSG00000161914		ZNF239	ENSG00000196793		TIGD4	ENSG00000169989
ZNF236	ENSG00000130856		ZEB2	ENSG00000169554		ZNF24	ENSG00000172466		LIN28A	ENSG00000131914
ZNF239	ENSG00000196793		ZNF541	ENSG00000118156		ZNF248	ENSG00000198105		LIN28B	ENSG00000187772
ZNF24	ENSG00000172466		TIGD3	ENSG00000173825		ZNF25	ENSG00000175395		YBX2	ENSG00000006047
ZNF248	ENSG00000198105		TIGD4	ENSG00000169989		ZNF250	ENSG00000196150		YBX3	ENSG00000060138
ZNF25	ENSG00000175395		LIN28A	ENSG00000131914		ZNF251	ENSG00000198169		RBPJL	ENSG00000124232
ZNF250	ENSG00000196150		LIN28B	ENSG00000187772		ZNF253	ENSG00000256771		CUX2	ENSG00000111249
ZNF251	ENSG00000198169		YBX2	ENSG00000006047		ZNF254	ENSG00000213096		ONECUT1	ENSG00000169856
ZNF253	ENSG00000256771		YBX3	ENSG00000060138		ZNF256	ENSG00000152454		ONECUT2	ENSG00000119547
ZNF254	ENSG00000213096		RBPJL	ENSG00000124232		ZNF26	ENSG00000198393		ONECUT3	ENSG00000205922
ZNF256	ENSG00000152454		CUX2	ENSG00000111249		ZNF260	ENSG00000254004		SATB2	ENSG00000119042
ZNF26	ENSG00000198393		ONECUT1	ENSG00000169856		ZNF263	ENSG00000006194		CXXC4	ENSG00000168772
ZNF260	ENSG00000254004		ONECUT2	ENSG00000119547		ZNF264	ENSG00000083844		TET1	ENSG00000138336
ZNF263	ENSG00000006194		ONECUT3	ENSG00000205922		ZNF266	ENSG00000174652		TET3	ENSG00000187605
ZNF264	ENSG00000083844		SATB2	ENSG00000119042		ZNF267	ENSG00000185947		DMRT1	ENSG00000137090
ZNF266	ENSG00000174652		CXXC4	ENSG00000168772		ZNF268	ENSG00000090612		DMRT2	ENSG00000173253
ZNF267	ENSG00000185947		TET1	ENSG00000138336		ZNF274	ENSG00000171606		DMRT3	ENSG00000064218
ZNF268	ENSG00000090612		TET3	ENSG00000187605		ZNF276	ENSG00000158805		DMRTA1	ENSG00000176399
ZNF274	ENSG00000171606		DMRT1	ENSG00000137090		ZNF28	ENSG00000198538		DMRTA2	ENSG00000142700
ZNF276	ENSG00000158805		DMRT2	ENSG00000173253		ZNF280D	ENSG00000137871		DMRTB1	ENSG00000143006
ZNF28	ENSG00000198538		DMRT3	ENSG00000064218		ZNF281	ENSG00000162702		DMRTC2	ENSG00000142025
ZNF280D	ENSG00000137871		DMRTA1	ENSG00000176399		ZNF282	ENSG00000170265		E2F1	ENSG00000101412
ZNF281	ENSG00000162702		DMRTA2	ENSG00000142700		ZNF283	ENSG00000167637		E2F2	ENSG00000007968
ZNF282	ENSG00000170265		DMRTB1	ENSG00000143006		ZNF284	ENSG00000186026		E2F7	ENSG00000165891
ZNF283	ENSG00000167637		DMRTC2	ENSG00000142025		ZNF285	ENSG00000267508		E2F8	ENSG00000129173
ZNF284	ENSG00000186026		E2F1	ENSG00000101412		ZNF286B	ENSG00000249459		EBF1	ENSG00000164330
ZNF285	ENSG00000267508		E2F2	ENSG00000007968		ZNF287	ENSG00000141040		EBF2	ENSG00000221818
ZNF286B	ENSG00000249459		E2F7	ENSG00000165891		ZNF292	ENSG00000188994		EBF3	ENSG00000108001
ZNF287	ENSG00000141040		E2F8	ENSG00000129173		ZNF296	ENSG00000170684		EHF	ENSG00000135373
ZNF292	ENSG00000188994		EBF2	ENSG00000221818		ZNF3	ENSG00000166526		ELF5	ENSG00000135374
ZNF3	ENSG00000166526		EBF3	ENSG00000108001		ZNF30	ENSG00000168661		ETV1	ENSG00000006468
ZNF30	ENSG00000168661		EHF	ENSG00000135373		ZNF300	ENSG00000145908		ETV2	ENSG00000105672
ZNF300	ENSG00000145908		ELF5	ENSG00000135374		ZNF302	ENSG00000089335		ETV3	ENSG00000117036
ZNF302	ENSG00000089335		ETV1	ENSG00000006468		ZNF304	ENSG00000131845		ETV4	ENSG00000175832
ZNF304	ENSG00000131845		ETV2	ENSG00000105672		ZNF316	ENSG00000205903		ETV5	ENSG00000244405
ZNF316	ENSG00000205903		ETV3	ENSG00000117036		ZNF317	ENSG00000130803		ETV7	ENSG00000010030
ZNF317	ENSG00000130803		ETV4	ENSG00000175832		ZNF318	ENSG00000171467		FEV	ENSG00000163497
ZNF318	ENSG00000171467		ETV5	ENSG00000244405		ZNF319	ENSG00000166188		FLI1	ENSG00000151702
ZNF319	ENSG00000166188		ETV7	ENSG00000010030		ZNF32	ENSG00000169740		SPDEF	ENSG00000124664
ZNF32	ENSG00000169740		FEV	ENSG00000163497		ZNF320	ENSG00000182986		SPI1	ENSG00000066336
ZNF320	ENSG00000182986		FLI1	ENSG00000151702		ZNF322	ENSG00000181315		SPIB	ENSG00000269404
ZNF322	ENSG00000181315		SPDEF	ENSG00000124664		ZNF324	ENSG00000083812		SPIC	ENSG00000166211
ZNF324	ENSG00000083812		SPI1	ENSG00000066336		ZNF324B	ENSG00000249471		ELF3	ENSG00000163435
ZNF324B	ENSG00000249471		SPIB	ENSG00000269404		ZNF326	ENSG00000162664		FOXA1	ENSG00000129514
ZNF326	ENSG00000162664		SPIC	ENSG00000166211		ZNF329	ENSG00000181894		FOXA2	ENSG00000125798
ZNF329	ENSG00000181894		ELF3	ENSG00000163435		ZNF331	ENSG00000130844		FOXA3	ENSG00000170608
ZNF333	ENSG00000160961		FOXA1	ENSG00000129514		ZNF333	ENSG00000160961		FOXB1	ENSG00000171956
ZNF334	ENSG00000198185		FOXA2	ENSG00000125798		ZNF334	ENSG00000198185		FOXC1	ENSG00000054598
ZNF335	ENSG00000198026		FOXA3	ENSG00000170608		ZNF335	ENSG00000198026		FOXC2	ENSG00000176692
ZNF337	ENSG00000130684		FOXB1	ENSG00000171956		ZNF337	ENSG00000130684		FOXD1	ENSG00000251493
ZNF33A	ENSG00000189180		FOXC1	ENSG00000054598		ZNF33A	ENSG00000189180		FOXD2	ENSG00000186564
ZNF33B	ENSG00000196693		FOXC2	ENSG00000176692		ZNF33B	ENSG00000196693		FOXD3	ENSG00000187140
ZNF34	ENSG00000196378		FOXD1	ENSG00000251493		ZNF34	ENSG00000196378		FOXD4	ENSG00000170122
ZNF341	ENSG00000131061		FOXD2	ENSG00000186564		ZNF341	ENSG00000131061		FOXD4L1	ENSG00000184492
ZNF343	ENSG00000088876		FOXD3	ENSG00000187140		ZNF343	ENSG00000088876		FOXE1	ENSG00000178919
ZNF345	ENSG00000251247		FOXD4	ENSG00000170122		ZNF345	ENSG00000251247		FOXE3	ENSG00000186790
ZNF346	ENSG00000113761		FOXD4L1	ENSG00000184492		ZNF346	ENSG00000113761		FOXF1	ENSG00000103241
ZNF347	ENSG00000197937		FOXE1	ENSG00000178919		ZNF347	ENSG00000197937		FOXF2	ENSG00000137273
ZNF35	ENSG00000169981		FOXE3	ENSG00000186790		ZNF35	ENSG00000169981		FOXG1	ENSG00000176165
ZNF350	ENSG00000256683		FOXF1	ENSG00000103241		ZNF350	ENSG00000256683		FOXH1	ENSG00000160973
ZNF354A	ENSG00000169131		FOXF2	ENSG00000137273		ZNF354A	ENSG00000169131		FOXI1	ENSG00000168269
ZNF354B	ENSG00000178338		FOXG1	ENSG00000176165		ZNF354B	ENSG00000178338		FOXI2	ENSG00000186766
ZNF354C	ENSG00000177932		FOXH1	ENSG00000160973		ZNF354C	ENSG00000177932		FOXJ1	ENSG00000129654
ZNF358	ENSG00000198816		FOXI1	ENSG00000168269		ZNF358	ENSG00000198816		FOXL1	ENSG00000176678
ZNF362	ENSG00000160094		FOXI2	ENSG00000186766		ZNF362	ENSG00000160094		FOXL2	ENSG00000183770
ZNF366	ENSG00000178175		FOXJ1	ENSG00000129654		ZNF366	ENSG00000178175		FOXM1	ENSG00000111206
ZNF37A	ENSG00000075407		FOXL1	ENSG00000176678		ZNF37A	ENSG00000075407		FOXN1	ENSG00000109101
ZNF383	ENSG00000188283		FOXL2	ENSG00000183770		ZNF383	ENSG00000188283		FOXN4	ENSG00000139445
ZNF384	ENSG00000126746		FOXM1	ENSG00000111206		ZNF384	ENSG00000126746		FOXO6	ENSG00000204060
ZNF385B	ENSG00000144331		FOXN1	ENSG00000109101		ZNF385B	ENSG00000144331		FOXQ1	ENSG00000164379
ZNF391	ENSG00000124613		FOXN4	ENSG00000139445		ZNF385D	ENSG00000151789		FOXR1	ENSG00000176302
ZNF394	ENSG00000160908		FOXO6	ENSG00000204060		ZNF391	ENSG00000124613		FOXS1	ENSG00000179772
ZNF395	ENSG00000186918		FOXP2	ENSG00000128573		ZNF394	ENSG00000160908		GATA2	ENSG00000179348
ZNF397	ENSG00000186812		FOXQ1	ENSG00000164379		ZNF395	ENSG00000186918		GATA3	ENSG00000107485
ZNF398	ENSG00000197024		FOXR1	ENSG00000176302		ZNF396	ENSG00000186496		GATA4	ENSG00000136574
ZNF407	ENSG00000215421		FOXS1	ENSG00000179772		ZNF397	ENSG00000186812		GATA5	ENSG00000130700
ZNF408	ENSG00000175213		GATA2	ENSG00000179348		ZNF398	ENSG00000197024		GATA6	ENSG00000141448
ZNF410	ENSG00000119725		GATA3	ENSG00000107485		ZNF407	ENSG00000215421		GCM1	ENSG00000137270
ZNF414	ENSG00000133250		GATA4	ENSG00000136574		ZNF408	ENSG00000175213		GCM2	ENSG00000124827
ZNF416	ENSG00000083817		GATA5	ENSG00000130700		ZNF410	ENSG00000119725		GRHL1	ENSG00000134317
ZNF417	ENSG00000173480		GATA6	ENSG00000141448		ZNF414	ENSG00000133250		GRHL2	ENSG00000083307
ZNF418	ENSG00000196724		GCM1	ENSG00000137270		ZNF416	ENSG00000083817		GRHL3	ENSG00000158055
ZNF419	ENSG00000105136		GCM2	ENSG00000124827		ZNF417	ENSG00000173480		TFCP2L1	ENSG00000115112
ZNF420	ENSG00000197050		GRHL1	ENSG00000134317		ZNF418	ENSG00000196724		LEF1	ENSG00000138795
ZNF423	ENSG00000102935		GRHL2	ENSG00000083307		ZNF419	ENSG00000105136		SOX1	ENSG00000182968
ZNF425	ENSG00000204947		GRHL3	ENSG00000158055		ZNF420	ENSG00000197050		SOX15	ENSG00000129194
ZNF426	ENSG00000130818		TFCP2L1	ENSG00000115112		ZNF423	ENSG00000102935		SOX2	ENSG00000181449
ZNF428	ENSG00000131116		LEF1	ENSG00000138795		ZNF425	ENSG00000204947		SOX21	ENSG00000125285
ZNF429	ENSG00000197013		SOX1	ENSG00000182968		ZNF426	ENSG00000130818		SOX30	ENSG00000039600
ZNF43	ENSG00000198521		SOX11	ENSG00000176887		ZNF428	ENSG00000131116		SOX4	ENSG00000124766
ZNF430	ENSG00000118620		SOX15	ENSG00000129194		ZNF429	ENSG00000197013		SOX5	ENSG00000134532
ZNF431	ENSG00000196705		SOX17	ENSG00000164736		ZNF43	ENSG00000198521		SOX6	ENSG00000110693
ZNF432	ENSG00000256087		SOX2	ENSG00000181449		ZNF430	ENSG00000118620		SOX7	ENSG00000171056
ZNF436	ENSG00000125945		SOX21	ENSG00000125285		ZNF431	ENSG00000196705		SOX8	ENSG00000005513
ZNF438	ENSG00000183621		SOX30	ENSG00000039600		ZNF432	ENSG00000256087		SOX9	ENSG00000125398
ZNF439	ENSG00000171291		SOX4	ENSG00000124766		ZNF436	ENSG00000125945		TCF7	ENSG00000081059
ZNF44	ENSG00000197857		SOX5	ENSG00000134532		ZNF438	ENSG00000183621		ALX1	ENSG00000180318
ZNF440	ENSG00000171295		SOX6	ENSG00000110693		ZNF439	ENSG00000171291		ALX3	ENSG00000156150
ZNF441	ENSG00000197044		SOX7	ENSG00000171056		ZNF44	ENSG00000197857		ALX4	ENSG00000052850
ZNF442	ENSG00000198342		SOX8	ENSG00000005513		ZNF440	ENSG00000171295		ANHX	ENSG00000227059
ZNF443	ENSG00000180855		SOX9	ENSG00000125398		ZNF441	ENSG00000197044		BARHL2	ENSG00000143032
ZNF444	ENSG00000167685		TCF7	ENSG00000081059		ZNF442	ENSG00000198342		BARX1	ENSG00000131668
ZNF445	ENSG00000185219		ALX1	ENSG00000180318		ZNF443	ENSG00000180855		BARX2	ENSG00000043039
ZNF446	ENSG00000083838		ALX3	ENSG00000156150		ZNF444	ENSG00000167685		CDX1	ENSG00000113722
ZNF45	ENSG00000124459		ALX4	ENSG00000052850		ZNF445	ENSG00000185219		CDX2	ENSG00000165556
ZNF451	ENSG00000112200		ANHX	ENSG00000227059		ZNF446	ENSG00000083838		DBX2	ENSG00000185610
ZNF454	ENSG00000178187		BARHL2	ENSG00000143032		ZNF45	ENSG00000124459		DLX1	ENSG00000144355
ZNF460	ENSG00000197714		BARX1	ENSG00000131668		ZNF451	ENSG00000112200		DLX2	ENSG00000115844
ZNF461	ENSG00000197808		BARX2	ENSG00000043039		ZNF454	ENSG00000178187		DLX3	ENSG00000064195
ZNF462	ENSG00000148143		CDX1	ENSG00000113722		ZNF460	ENSG00000197714		DLX4	ENSG00000108813
ZNF468	ENSG00000204604		CDX2	ENSG00000165556		ZNF461	ENSG00000197808		DLX5	ENSG00000105880
ZNF470	ENSG00000197016		DBX2	ENSG00000185610		ZNF462	ENSG00000148143		DLX6	ENSG00000006377
ZNF471	ENSG00000196263		DLX1	ENSG00000144355		ZNF468	ENSG00000204604		DMBX1	ENSG00000197587
ZNF48	ENSG00000180035		DLX2	ENSG00000115844		ZNF470	ENSG00000197016		DPRX	ENSG00000204595
ZNF480	ENSG00000198464		DLX3	ENSG00000064195		ZNF471	ENSG00000196263		DRGX	ENSG00000165606
ZNF484	ENSG00000127081		DLX4	ENSG00000108813		ZNF48	ENSG00000180035		EMX1	ENSG00000135638
ZNF485	ENSG00000198298		DLX5	ENSG00000105880		ZNF480	ENSG00000198464		EMX2	ENSG00000170370
ZNF490	ENSG00000188033		DLX6	ENSG00000006377		ZNF484	ENSG00000127081		EN1	ENSG00000163064
ZNF491	ENSG00000177599		DMBX1	ENSG00000197587		ZNF485	ENSG00000198298		EN2	ENSG00000164778
ZNF493	ENSG00000196268		DPRX	ENSG00000204595		ZNF490	ENSG00000188033		EVX1	ENSG00000106038
ZNF496	ENSG00000162714		DRGX	ENSG00000165606		ZNF491	ENSG00000177599		EVX2	ENSG00000174279
ZNF497	ENSG00000174586		EMX1	ENSG00000135638		ZNF493	ENSG00000196268		GBX1	ENSG00000164900
ZNF500	ENSG00000103199		EMX2	ENSG00000170370		ZNF496	ENSG00000162714		GSC	ENSG00000133937
ZNF501	ENSG00000186446		EN1	ENSG00000163064		ZNF497	ENSG00000174586		GSC2	ENSG00000063515
ZNF502	ENSG00000196653		EN2	ENSG00000164778		ZNF500	ENSG00000103199		HESX1	ENSG00000163666
ZNF503	ENSG00000165655		EVX1	ENSG00000106038		ZNF501	ENSG00000186446		HHEX	ENSG00000152804
ZNF506	ENSG00000081665		EVX2	ENSG00000174279		ZNF502	ENSG00000196653		HMX1	ENSG00000215612
ZNF507	ENSG00000168813		GBX1	ENSG00000164900		ZNF503	ENSG00000165655		HMX2	ENSG00000188816
ZNF510	ENSG00000081386		GSC	ENSG00000133937		ZNF506	ENSG00000081665		HNF1A	ENSG00000135100
ZNF511	ENSG00000198546		GSC2	ENSG00000063515		ZNF507	ENSG00000168813		HNF1B	ENSG00000108753
ZNF512B	ENSG00000196700		HESX1	ENSG00000163666		ZNF510	ENSG00000081386		HOMEZ	ENSG00000215271
ZNF513	ENSG00000163795		HHEX	ENSG00000152804		ZNF511	ENSG00000198546		HOXA10	ENSG00000253293
ZNF514	ENSG00000144026		HLX	ENSG00000136630		ZNF512B	ENSG00000196700		HOXA11	ENSG00000005073
ZNF517	ENSG00000197363		HMX1	ENSG00000215612		ZNF513	ENSG00000163795		HOXA13	ENSG00000106031
ZNF518A	ENSG00000177853		HMX2	ENSG00000188816		ZNF514	ENSG00000144026		HOXA3	ENSG00000105997
ZNF518B	ENSG00000178163		HNF1A	ENSG00000135100		ZNF516	ENSG00000101493		HOXA4	ENSG00000197576
ZNF519	ENSG00000175322		HNF1B	ENSG00000108753		ZNF517	ENSG00000197363		HOXA5	ENSG00000106004
ZNF521	ENSG00000198795		HOMEZ	ENSG00000215271		ZNF518A	ENSG00000177853		HOXA6	ENSG00000106006
ZNF525	ENSG00000203326		HOXA1	ENSG00000105991		ZNF518B	ENSG00000178163		HOXB13	ENSG00000159184
ZNF526	ENSG00000167625		HOXA10	ENSG00000253293		ZNF519	ENSG00000175322		HOXB3	ENSG00000120093
ZNF527	ENSG00000189164		HOXA11	ENSG00000005073		ZNF521	ENSG00000198795		HOXB4	ENSG00000182742
ZNF528	ENSG00000167555		HOXA13	ENSG00000106031		ZNF525	ENSG00000203326		HOXB5	ENSG00000120075
ZNF529	ENSG00000186020		HOXA2	ENSG00000105996		ZNF526	ENSG00000167625		HOXB6	ENSG00000108511
ZNF530	ENSG00000183647		HOXA3	ENSG00000105997		ZNF527	ENSG00000189164		HOXB7	ENSG00000260027
ZNF532	ENSG00000074657		HOXA4	ENSG00000197576		ZNF528	ENSG00000167555		HOXB8	ENSG00000120068
ZNF543	ENSG00000178229		HOXA5	ENSG00000106004		ZNF529	ENSG00000186020		HOXB9	ENSG00000170689
ZNF544	ENSG00000198131		HOXA6	ENSG00000106006		ZNF530	ENSG00000183647		HOXC10	ENSG00000180818
ZNF547	ENSG00000152433		HOXB13	ENSG00000159184		ZNF532	ENSG00000074657		HOXC11	ENSG00000123388
ZNF548	ENSG00000188785		HOXB3	ENSG00000120093		ZNF543	ENSG00000178229		HOXC12	ENSG00000123407
ZNF549	ENSG00000121406		HOXB4	ENSG00000182742		ZNF544	ENSG00000198131		HOXC13	ENSG00000123364
ZNF550	ENSG00000251369		HOXB5	ENSG00000120075		ZNF547	ENSG00000152433		HOXC4	ENSG00000198353
ZNF551	ENSG00000204519		HOXB6	ENSG00000108511		ZNF548	ENSG00000188785		HOXC5	ENSG00000172789
ZNF552	ENSG00000178935		HOXB7	ENSG00000260027		ZNF549	ENSG00000121406		HOXC6	ENSG00000197757
ZNF554	ENSG00000172006		HOXB8	ENSG00000120068		ZNF550	ENSG00000251369		HOXC8	ENSG00000037965
ZNF557	ENSG00000130544		HOXB9	ENSG00000170689		ZNF551	ENSG00000204519		HOXC9	ENSG00000180806
ZNF558	ENSG00000167785		HOXC10	ENSG00000180818		ZNF552	ENSG00000178935		HOXD1	ENSG00000128645
ZNF559	ENSG00000188321		HOXC11	ENSG00000123388		ZNF554	ENSG00000172006		HOXD10	ENSG00000128710
ZNF561	ENSG00000171469		HOXC12	ENSG00000123407		ZNF557	ENSG00000130544		HOXD11	ENSG00000128713
ZNF562	ENSG00000171466		HOXC13	ENSG00000123364		ZNF558	ENSG00000167785		HOXD12	ENSG00000170178
ZNF564	ENSG00000249709		HOXC4	ENSG00000198353		ZNF559	ENSG00000188321		HOXD13	ENSG00000128714
ZNF565	ENSG00000196357		HOXC5	ENSG00000172789		ZNF561	ENSG00000171469		HOXD3	ENSG00000128652
ZNF566	ENSG00000186017		HOXC6	ENSG00000197757		ZNF562	ENSG00000171466		HOXD4	ENSG00000170166
ZNF567	ENSG00000189042		HOXC8	ENSG00000037965		ZNF564	ENSG00000249709		HOXD9	ENSG00000128709
ZNF568	ENSG00000198453		HOXC9	ENSG00000180806		ZNF565	ENSG00000196357		IRX1	ENSG00000170549
ZNF570	ENSG00000171827		HOXD1	ENSG00000128645		ZNF566	ENSG00000186017		IRX2	ENSG00000170561
ZNF571	ENSG00000180479		HOXD10	ENSG00000128710		ZNF567	ENSG00000189042		IRX3	ENSG00000177508
ZNF575	ENSG00000176472		HOXD11	ENSG00000128713		ZNF568	ENSG00000198453		IRX4	ENSG00000113430
ZNF576	ENSG00000124444		HOXD12	ENSG00000170178		ZNF570	ENSG00000171827		IRX5	ENSG00000176842
ZNF577	ENSG00000161551		HOXD13	ENSG00000128714		ZNF571	ENSG00000180479		IRX6	ENSG00000159387
ZNF579	ENSG00000218891		HOXD3	ENSG00000128652		ZNF575	ENSG00000176472		ISL1	ENSG00000016082
ZNF580	ENSG00000213015		HOXD4	ENSG00000170166		ZNF576	ENSG00000124444		ISL2	ENSG00000159556
ZNF581	ENSG00000171425		HOXD9	ENSG00000128709		ZNF577	ENSG00000161551		ISX	ENSG00000175329
ZNF582	ENSG00000018869		IRX1	ENSG00000170549		ZNF579	ENSG00000218891		LBX1	ENSG00000138136
ZNF583	ENSG00000198440		IRX2	ENSG00000170561		ZNF580	ENSG00000213015		LBX2	ENSG00000179528
ZNF584	ENSG00000171574		IRX3	ENSG00000177508		ZNF581	ENSG00000171425		LHX1	ENSG00000132130
ZNF585A	ENSG00000196967		IRX4	ENSG00000113430		ZNF582	ENSG00000018869		LHX2	ENSG00000106689
ZNF585B	ENSG00000245680		IRX5	ENSG00000176842		ZNF583	ENSG00000198440		LHX3	ENSG00000107187
ZNF586	ENSG00000083828		IRX6	ENSG00000159387		ZNF584	ENSG00000171574		LHX5	ENSG00000089116
ZNF587	ENSG00000198466		ISL1	ENSG00000016082		ZNF585A	ENSG00000196967		LHX6	ENSG00000106852
ZNF587B	ENSG00000269343		ISL2	ENSG00000159556		ZNF585B	ENSG00000245680		LHX8	ENSG00000162624
ZNF589	ENSG00000164048		ISX	ENSG00000175329		ZNF586	ENSG00000083828		LHX9	ENSG00000143355
ZNF592	ENSG00000166716		LBX1	ENSG00000138136		ZNF587	ENSG00000198466		LMX1A	ENSG00000162761
ZNF594	ENSG00000180626		LBX2	ENSG00000179528		ZNF587B	ENSG00000269343		LMX1B	ENSG00000136944
ZNF595	ENSG00000197701		LHX1	ENSG00000132130		ZNF589	ENSG00000164048		MEIS1	ENSG00000143995
ZNF596	ENSG00000172748		LHX2	ENSG00000106689		ZNF592	ENSG00000166716		MEIS2	ENSG00000134138
ZNF597	ENSG00000167981		LHX3	ENSG00000107187		ZNF594	ENSG00000180626		MEIS3	ENSG00000105419
ZNF599	ENSG00000153896		LHX5	ENSG00000089116		ZNF595	ENSG00000197701		MEOX1	ENSG00000005102
ZNF600	ENSG00000189190		LHX8	ENSG00000162624		ZNF596	ENSG00000172748		MEOX2	ENSG00000106511
ZNF605	ENSG00000196458		LHX9	ENSG00000143355		ZNF597	ENSG00000167981		MIXL1	ENSG00000185155
ZNF606	ENSG00000166704		LMX1A	ENSG00000162761		ZNF599	ENSG00000153896		MKX	ENSG00000150051
ZNF607	ENSG00000198182		LMX1B	ENSG00000136944		ZNF600	ENSG00000189190		MNX1	ENSG00000130675
ZNF608	ENSG00000168916		MEIS1	ENSG00000143995		ZNF605	ENSG00000196458		MSX1	ENSG00000163132
ZNF609	ENSG00000180357		MEIS3	ENSG00000105419		ZNF606	ENSG00000166704		MSX2	ENSG00000120149
ZNF611	ENSG00000213020		MEOX1	ENSG00000005102		ZNF607	ENSG00000198182		NKX1-1	ENSG00000235608
ZNF613	ENSG00000176024		MEOX2	ENSG00000106511		ZNF608	ENSG00000168916		NKX2-1	ENSG00000136352
ZNF614	ENSG00000142556		MIXL1	ENSG00000185155		ZNF609	ENSG00000180357		NKX2-2	ENSG00000125820
ZNF615	ENSG00000197619		MKX	ENSG00000150051		ZNF611	ENSG00000213020		NKX2-3	ENSG00000119919
ZNF616	ENSG00000204611		MNX1	ENSG00000130675		ZNF613	ENSG00000176024		NKX2-4	ENSG00000125816
ZNF618	ENSG00000157657		MSX1	ENSG00000163132		ZNF614	ENSG00000142556		NKX2-5	ENSG00000183072
ZNF619	ENSG00000177873		MSX2	ENSG00000120149		ZNF615	ENSG00000197619		NKX2-6	ENSG00000180053
ZNF620	ENSG00000177842		NKX1-1	ENSG00000235608		ZNF616	ENSG00000204611		NKX2-8	ENSG00000136327
ZNF621	ENSG00000172888		NKX2-1	ENSG00000136352		ZNF618	ENSG00000157657		NKX3-1	ENSG00000167034
ZNF623	ENSG00000183309		NKX2-2	ENSG00000125820		ZNF619	ENSG00000177873		NKX3-2	ENSG00000109705
ZNF625	ENSG00000257591		NKX2-3	ENSG00000119919		ZNF620	ENSG00000177842		NKX6-1	ENSG00000163623
ZNF626	ENSG00000188171		NKX2-4	ENSG00000125816		ZNF621	ENSG00000172888		NKX6-2	ENSG00000148826
ZNF627	ENSG00000198551		NKX2-5	ENSG00000183072		ZNF623	ENSG00000183309		NKX6-3	ENSG00000165066
ZNF629	ENSG00000102870		NKX2-6	ENSG00000180053		ZNF625	ENSG00000257591		OTX1	ENSG00000115507
ZNF639	ENSG00000121864		NKX2-8	ENSG00000136327		ZNF626	ENSG00000188171		PBX1	ENSG00000185630
ZNF641	ENSG00000167528		NKX3-1	ENSG00000167034		ZNF627	ENSG00000198551		PBX3	ENSG00000167081
ZNF644	ENSG00000122482		NKX3-2	ENSG00000109705		ZNF629	ENSG00000102870		PBX4	ENSG00000105717
ZNF649	ENSG00000198093		NKX6-1	ENSG00000163623		ZNF639	ENSG00000121864		PDX1	ENSG00000139515
ZNF652	ENSG00000198740		NKX6-2	ENSG00000148826		ZNF641	ENSG00000167528		PHOX2A	ENSG00000165462
ZNF654	ENSG00000175105		NKX6-3	ENSG00000165066		ZNF644	ENSG00000122482		PHOX2B	ENSG00000109132
ZNF655	ENSG00000197343		OTX1	ENSG00000115507		ZNF649	ENSG00000198093		PITX1	ENSG00000069011
ZNF658	ENSG00000196409		PBX1	ENSG00000185630		ZNF652	ENSG00000198740		PITX2	ENSG00000164093
ZNF660	ENSG00000144792		PBX3	ENSG00000167081		ZNF654	ENSG00000175105		PITX3	ENSG00000107859
ZNF662	ENSG00000182983		PBX4	ENSG00000105717		ZNF655	ENSG00000197343		PROP1	ENSG00000175325
ZNF664	ENSG00000179195		PDX1	ENSG00000139515		ZNF658	ENSG00000196409		PRRX1	ENSG00000116132
ZNF665	ENSG00000197497		PHOX2A	ENSG00000165462		ZNF660	ENSG00000144792		PRRX2	ENSG00000167157
ZNF668	ENSG00000167394		PHOX2B	ENSG00000109132		ZNF662	ENSG00000182983		RAX2	ENSG00000173976
ZNF669	ENSG00000188295		PITX1	ENSG00000069011		ZNF664	ENSG00000179195		SHOX2	ENSG00000168779
ZNF670	ENSG00000135747		PITX2	ENSG00000164093		ZNF665	ENSG00000197497		SIX1	ENSG00000126778
ZNF671	ENSG00000083814		PITX3	ENSG00000107859		ZNF668	ENSG00000167394		SIX2	ENSG00000170577
ZNF672	ENSG00000171161		PKNOX2	ENSG00000165495		ZNF669	ENSG00000188295		SIX3	ENSG00000138083
ZNF675	ENSG00000197372		PROP1	ENSG00000175325		ZNF670	ENSG00000135747		SIX4	ENSG00000100625
ZNF678	ENSG00000181450		PRRX1	ENSG00000116132		ZNF671	ENSG00000083814		SIX6	ENSG00000184302
ZNF680	ENSG00000173041		PRRX2	ENSG00000167157		ZNF672	ENSG00000171161		TLX1	ENSG00000107807
ZNF681	ENSG00000196172		RAX2	ENSG00000173976		ZNF675	ENSG00000197372		TLX2	ENSG00000115297
ZNF682	ENSG00000197124		SHOX2	ENSG00000168779		ZNF678	ENSG00000181450		TPRX1	ENSG00000178928
ZNF684	ENSG00000117010		SIX1	ENSG00000126778		ZNF680	ENSG00000173041		VENTX	ENSG00000151650
ZNF687	ENSG00000143373		SIX2	ENSG00000170577		ZNF681	ENSG00000196172		VSX1	ENSG00000100987
ZNF688	ENSG00000229809		SIX3	ENSG00000138083		ZNF682	ENSG00000197124		ZFHX2	ENSG00000136367
ZNF69	ENSG00000198429		SIX4	ENSG00000100625		ZNF684	ENSG00000117010		PAX2	ENSG00000075891
ZNF691	ENSG00000164011		SIX6	ENSG00000184302		ZNF687	ENSG00000143373		PAX3	ENSG00000135903
ZNF692	ENSG00000171163		TLX1	ENSG00000107807		ZNF688	ENSG00000229809		PAX4	ENSG00000106331
ZNF696	ENSG00000185730		TLX2	ENSG00000115297		ZNF69	ENSG00000198429		PAX6	ENSG00000007372
ZNF697	ENSG00000143067		TPRX1	ENSG00000178928		ZNF691	ENSG00000164011		PAX7	ENSG00000009709
ZNF699	ENSG00000196110		VENTX	ENSG00000151650		ZNF692	ENSG00000171163		POU1F1	ENSG00000064835
ZNF7	ENSG00000147789		VSX1	ENSG00000100987		ZNF696	ENSG00000185730		POU2F2	ENSG00000028277
ZNF70	ENSG00000187792		ZFHX2	ENSG00000136367		ZNF697	ENSG00000143067		POU2F3	ENSG00000137709
ZNF700	ENSG00000196757		PAX2	ENSG00000075891		ZNF699	ENSG00000196110		POU3F1	ENSG00000185668
ZNF701	ENSG00000167562		PAX3	ENSG00000135903		ZNF7	ENSG00000147789		POU3F2	ENSG00000184486
ZNF703	ENSG00000183779		PAX4	ENSG00000106331		ZNF70	ENSG00000187792		POU3F3	ENSG00000198914
ZNF704	ENSG00000164684		PAX6	ENSG00000007372		ZNF700	ENSG00000196757		POU4F1	ENSG00000152192
ZNF706	ENSG00000120963		PAX7	ENSG00000009709		ZNF701	ENSG00000167562		POU4F2	ENSG00000151615
ZNF707	ENSG00000181135		POU1F1	ENSG00000064835		ZNF703	ENSG00000183779		POU5F1	ENSG00000204531
ZNF708	ENSG00000182141		POU2F2	ENSG00000028277		ZNF704	ENSG00000164684		POU5F2	ENSG00000248483
ZNF71	ENSG00000197951		POU2F3	ENSG00000137709		ZNF706	ENSG00000120963		POU6F2	ENSG00000106536
ZNF710	ENSG00000140548		POU3F1	ENSG00000185668		ZNF707	ENSG00000181135		HSF5	ENSG00000176160
ZNF717	ENSG00000227124		POU3F2	ENSG00000184486		ZNF708	ENSG00000182141		IRF1	ENSG00000125347
ZNF718	ENSG00000250312		POU3F3	ENSG00000198914		ZNF71	ENSG00000197951		IRF4	ENSG00000137265
ZNF721	ENSG00000182903		POU4F1	ENSG00000152192		ZNF710	ENSG00000140548		IRF5	ENSG00000128604
ZNF726	ENSG00000213967		POU4F2	ENSG00000151615		ZNF717	ENSG00000227124		IRF6	ENSG00000117595
ZNF736	ENSG00000234444		POU5F1	ENSG00000204531		ZNF718	ENSG00000250312		IRF8	ENSG00000140968
ZNF737	ENSG00000237440		POU5F2	ENSG00000248483		ZNF721	ENSG00000182903		MSANTD1	ENSG00000188981
ZNF74	ENSG00000185252		POU6F2	ENSG00000106536		ZNF726	ENSG00000213967		MEF2C	ENSG00000081189
ZNF740	ENSG00000139651		HSF5	ENSG00000176160		ZNF736	ENSG00000234444		MYB	ENSG00000118513
ZNF746	ENSG00000181220		IRF1	ENSG00000125347		ZNF737	ENSG00000237440		MYBL1	ENSG00000185697
ZNF749	ENSG00000186230		IRF4	ENSG00000137265		ZNF74	ENSG00000185252		MYBL2	ENSG00000101057
ZNF75A	ENSG00000162086		IRF5	ENSG00000128604		ZNF740	ENSG00000139651		MYRF	ENSG00000124920
ZNF76	ENSG00000065029		IRF6	ENSG00000117595		ZNF746	ENSG00000181220		MYRFL	ENSG00000166268
ZNF761	ENSG00000160336		IRF8	ENSG00000140968		ZNF749	ENSG00000186230		ESR1	ENSG00000091831
ZNF764	ENSG00000169951		MSANTD1	ENSG00000188981		ZNF75A	ENSG00000162086		ESR2	ENSG00000140009
ZNF765	ENSG00000196417		MYB	ENSG00000118513		ZNF76	ENSG00000065029		ESRRB	ENSG00000119715
ZNF766	ENSG00000196214		MYBL1	ENSG00000185697		ZNF761	ENSG00000160336		ESRRG	ENSG00000196482
ZNF768	ENSG00000169957		MYBL2	ENSG00000101057		ZNF764	ENSG00000169951		HNF4A	ENSG00000101076
ZNF77	ENSG00000175691		MYRF	ENSG00000124920		ZNF765	ENSG00000196417		HNF4G	ENSG00000164749
ZNF770	ENSG00000198146		MYRFL	ENSG00000166268		ZNF766	ENSG00000196214		NR1D1	ENSG00000126368
ZNF771	ENSG00000179965		ESR1	ENSG00000091831		ZNF768	ENSG00000169957		NR1H4	ENSG00000012504
ZNF772	ENSG00000197128		ESR2	ENSG00000140009		ZNF77	ENSG00000175691		NR1I2	ENSG00000144852
ZNF773	ENSG00000152439		ESRRB	ENSG00000119715		ZNF770	ENSG00000198146		NR1I3	ENSG00000143257
ZNF774	ENSG00000196391		ESRRG	ENSG00000196482		ZNF771	ENSG00000179965		NR2E1	ENSG00000112333
ZNF775	ENSG00000196456		HNF4A	ENSG00000101076		ZNF772	ENSG00000197128		NR2F1	ENSG00000175745
ZNF776	ENSG00000152443		HNF4G	ENSG00000164749		ZNF773	ENSG00000152439		NR2F2	ENSG00000185551
ZNF777	ENSG00000196453		NR1D1	ENSG00000126368		ZNF774	ENSG00000196391		NR4A1	ENSG00000123358
ZNF778	ENSG00000170100		NR1H4	ENSG00000012504		ZNF775	ENSG00000196456		NR4A2	ENSG00000153234
ZNF780A	ENSG00000197782		NR1I2	ENSG00000144852		ZNF776	ENSG00000152443		NR4A3	ENSG00000119508
ZNF780B	ENSG00000128000		NR1I3	ENSG00000143257		ZNF777	ENSG00000196453		NR5A1	ENSG00000136931
ZNF781	ENSG00000196381		NR2E1	ENSG00000112333		ZNF778	ENSG00000170100		NR5A2	ENSG00000116833
ZNF782	ENSG00000196597		NR2F1	ENSG00000175745		ZNF780A	ENSG00000197782		NR6A1	ENSG00000148200
ZNF783	ENSG00000204946		NR2F2	ENSG00000185551		ZNF780B	ENSG00000128000		PGR	ENSG00000082175
ZNF784	ENSG00000179922		NR4A1	ENSG00000123358		ZNF781	ENSG00000196381		PPARG	ENSG00000132170
ZNF785	ENSG00000197162		NR4A2	ENSG00000153234		ZNF782	ENSG00000196597		RARG	ENSG00000172819
ZNF786	ENSG00000197362		NR4A3	ENSG00000119508		ZNF783	ENSG00000204946		RORA	ENSG00000069667
ZNF787	ENSG00000142409		NR5A1	ENSG00000136931		ZNF784	ENSG00000179922		RORB	ENSG00000198963
ZNF789	ENSG00000198556		NR5A2	ENSG00000116833		ZNF785	ENSG00000197162		RORC	ENSG00000143365
ZNF79	ENSG00000196152		NR6A1	ENSG00000148200		ZNF786	ENSG00000197362		RXRG	ENSG00000143171
ZNF790	ENSG00000197863		PGR	ENSG00000082175		ZNF787	ENSG00000142409		VDR	ENSG00000111424
ZNF791	ENSG00000173875		PPARG	ENSG00000132170		ZNF789	ENSG00000198556		AEBP1	ENSG00000106624
ZNF792	ENSG00000180884		RARG	ENSG00000172819		ZNF79	ENSG00000196152		CENPA	ENSG00000115163
ZNF793	ENSG00000188227		RORA	ENSG00000069667		ZNF790	ENSG00000197863		CPEB1	ENSG00000214575
ZNF799	ENSG00000196466		RORB	ENSG00000198963		ZNF791	ENSG00000173875		CSRNP3	ENSG00000178662
ZNF8	ENSG00000083842		RORC	ENSG00000143365		ZNF792	ENSG00000180884		LTF	ENSG00000012223
ZNF800	ENSG00000048405		RXRG	ENSG00000143171		ZNF793	ENSG00000188227		POU2AF1	ENSG00000110777
ZNF805	ENSG00000204524		VDR	ENSG00000111424		ZNF799	ENSG00000196466		PURG	ENSG00000172733
ZNF808	ENSG00000198482		AEBP1	ENSG00000106624		ZNF8	ENSG00000083842		RAG1	ENSG00000166349
ZNF813	ENSG00000198346		CENPA	ENSG00000115163		ZNF800	ENSG00000048405		SPZ1	ENSG00000164299
ZNF814	ENSG00000204514		CPEB1	ENSG00000214575		ZNF805	ENSG00000204524		TP63	ENSG00000073282
ZNF816	ENSG00000180257		CSRNP3	ENSG00000178662		ZNF808	ENSG00000198482		TP73	ENSG00000078900
ZNF823	ENSG00000197933		LTF	ENSG00000012223		ZNF813	ENSG00000198346		PAX5	ENSG00000196092
ZNF827	ENSG00000151612		POU2AF1	ENSG00000110777		ZNF814	ENSG00000204514		PAX8	ENSG00000125618
ZNF83	ENSG00000167766		PURG	ENSG00000172733		ZNF816	ENSG00000180257		PAX9	ENSG00000198807
ZNF830	ENSG00000198783		RAG1	ENSG00000166349		ZNF823	ENSG00000197933		PROX1	ENSG00000117707
ZNF835	ENSG00000127903		SPZ1	ENSG00000164299		ZNF827	ENSG00000151612		RFX2	ENSG00000087903
ZNF836	ENSG00000196267		TP63	ENSG00000073282		ZNF83	ENSG00000167766		RFX4	ENSG00000111783
ZNF837	ENSG00000152475		TP73	ENSG00000078900		ZNF830	ENSG00000198783		RFX6	ENSG00000185002
ZNF84	ENSG00000198040		PAX5	ENSG00000196092		ZNF835	ENSG00000127903		RFX8	ENSG00000196460
ZNF841	ENSG00000197608		PAX8	ENSG00000125618		ZNF836	ENSG00000196267		RUNX1	ENSG00000159216
ZNF843	ENSG00000176723		PAX9	ENSG00000198807		ZNF837	ENSG00000152475		RUNX2	ENSG00000124813
ZNF844	ENSG00000223547		PROX1	ENSG00000117707		ZNF84	ENSG00000198040		RUNX3	ENSG00000020633
ZNF845	ENSG00000213799		RFX2	ENSG00000087903		ZNF841	ENSG00000197608		AIRE	ENSG00000160224
ZNF846	ENSG00000196605		RFX4	ENSG00000111783		ZNF843	ENSG00000176723		DEAF1	ENSG00000177030
ZNF850	ENSG00000267041		RFX6	ENSG00000185002		ZNF844	ENSG00000223547		SKOR2	ENSG00000215474
ZNF852	ENSG00000178917		RFX8	ENSG00000196460		ZNF845	ENSG00000213799		SP140	ENSG00000079263
ZNF860	ENSG00000197385		RUNX1	ENSG00000159216		ZNF846	ENSG00000196605		SMAD9	ENSG00000120693
ZNF865	ENSG00000261221		RUNX2	ENSG00000124813		ZNF850	ENSG00000267041		STAT4	ENSG00000138378
ZNF879	ENSG00000234284		RUNX3	ENSG00000020633		ZNF852	ENSG00000178917		EOMES	ENSG00000163508
ZNF880	ENSG00000221923		AIRE	ENSG00000160224		ZNF860	ENSG00000197385		TBR1	ENSG00000136535
ZNF891	ENSG00000214029		DEAF1	ENSG00000177030		ZNF865	ENSG00000261221		TBX1	ENSG00000184058
ZNF91	ENSG00000167232		SKOR2	ENSG00000215474		ZNF879	ENSG00000234284		TBX10	ENSG00000167800
ZNF92	ENSG00000146757		SP140	ENSG00000079263		ZNF880	ENSG00000221923		TBX15	ENSG00000092607
ZNF93	ENSG00000184635		SMAD9	ENSG00000120693		ZNF891	ENSG00000214029		TBX18	ENSG00000112837
ZSCAN12	ENSG00000158691		STAT4	ENSG00000138378		ZNF91	ENSG00000167232		TBX19	ENSG00000143178
ZSCAN16	ENSG00000196812		EOMES	ENSG00000163508		ZNF92	ENSG00000146757		TBX2	ENSG00000121068
ZSCAN18	ENSG00000121413		TBR1	ENSG00000136535		ZNF93	ENSG00000184635		TBX20	ENSG00000164532
ZSCAN2	ENSG00000176371		TBX1	ENSG00000184058		ZSCAN12	ENSG00000158691		TBX21	ENSG00000073861
ZSCAN20	ENSG00000121903		TBX10	ENSG00000167800		ZSCAN16	ENSG00000196812		TBX3	ENSG00000135111
ZSCAN21	ENSG00000166529		TBX15	ENSG00000092607		ZSCAN18	ENSG00000121413		TBX4	ENSG00000121075
ZSCAN22	ENSG00000182318		TBX18	ENSG00000112837		ZSCAN2	ENSG00000176371		TBX5	ENSG00000089225
ZSCAN23	ENSG00000187987		TBX19	ENSG00000143178		ZSCAN20	ENSG00000121903		TBPL1	ENSG00000028839
ZSCAN25	ENSG00000197037		TBX2	ENSG00000121068		ZSCAN21	ENSG00000166529		TEAD4	ENSG00000197905
ZSCAN26	ENSG00000197062		TBX20	ENSG00000164532		ZSCAN22	ENSG00000182318		THAP9	ENSG00000168152
ZSCAN29	ENSG00000140265		TBX21	ENSG00000073861		ZSCAN23	ENSG00000187987
ZSCAN30	ENSG00000186814		TBX3	ENSG00000135111		ZSCAN25	ENSG00000197037
ZSCAN31	ENSG00000235109		TBX4	ENSG00000121075		ZSCAN26	ENSG00000197062
ZSCAN32	ENSG00000140987		TBX5	ENSG00000089225		ZSCAN29	ENSG00000140265
ZSCAN9	ENSG00000137185		TBX6	ENSG00000149922		ZSCAN30	ENSG00000186814
ZXDC	ENSG00000070476		TBPL1	ENSG00000028839		ZSCAN31	ENSG00000235109
PATZ1	ENSG00000100105		TEAD4	ENSG00000197905		ZSCAN32	ENSG00000140987
ZBTB24	ENSG00000112365		THAP9	ENSG00000168152		ZSCAN9	ENSG00000137185
ZNF524	ENSG00000171443					ZXDC	ENSG00000070476
ZNF277	ENSG00000198839					PATZ1	ENSG00000100105
ZNF512	ENSG00000243943					ZBTB24	ENSG00000112365
ZEB1	ENSG00000148516					ZNF524	ENSG00000171443
ZFHX3	ENSG00000140836					ZNF277	ENSG00000198839
ZFHX4	ENSG00000091656					ZNF512	ENSG00000243943
TRERF1	ENSG00000124496					ZEB1	ENSG00000148516
NFYA	ENSG00000001167					ZEB2	ENSG00000169554
MBNL2	ENSG00000139793					ZFHX4	ENSG00000091656
ZC3H8	ENSG00000144161					TRERF1	ENSG00000124496
ZGPAT	ENSG00000197114					NFYA	ENSG00000001167
CENPB	ENSG00000125817					MBNL2	ENSG00000139793
CENPBD1	ENSG00000177946					ZC3H8	ENSG00000144161
JRK	ENSG00000234616					ZGPAT	ENSG00000197114
JRKL	ENSG00000183340					CENPB	ENSG00000125817
TIGD1	ENSG00000221944					CENPBD1	ENSG00000177946
TIGD2	ENSG00000180346					JRK	ENSG00000234616
TIGD5	ENSG00000179886					JRKL	ENSG00000183340
TIGD6	ENSG00000164296					TIGD1	ENSG00000221944
TIGD7	ENSG00000140993					TIGD2	ENSG00000180346
CAMTA2	ENSG00000108509					TIGD5	ENSG00000179886
YBX1	ENSG00000065978					TIGD6	ENSG00000164296
RBPJ	ENSG00000168214					TIGD7	ENSG00000140993
CUX1	ENSG00000257923					CAMTA2	ENSG00000108509
SATB1	ENSG00000182568					YBX1	ENSG00000065978
CXXC1	ENSG00000154832					RBPJ	ENSG00000168214
CXXC5	ENSG00000171604					CUX1	ENSG00000257923
DNMT1	ENSG00000130816					SATB1	ENSG00000182568
KDM2A	ENSG00000173120					CXXC1	ENSG00000154832
KDM2B	ENSG00000089094					CXXC5	ENSG00000171604
KMT2A	ENSG00000118058					DNMT1	ENSG00000130816
KMT2B	ENSG00000272333					KDM2A	ENSG00000173120
E2F3	ENSG00000112242					KDM2B	ENSG00000089094
E2F4	ENSG00000205250					KMT2A	ENSG00000118058
E2F5	ENSG00000133740					KMT2B	ENSG00000272333
E2F6	ENSG00000169016					E2F3	ENSG00000112242
TFDP1	ENSG00000198176					E2F4	ENSG00000205250
EBF1	ENSG00000164330					E2F5	ENSG00000133740
EBF4	ENSG00000088881					E2F6	ENSG00000169016
ELF1	ENSG00000120690					TFDP1	ENSG00000198176
ELF2	ENSG00000109381					EBF4	ENSG00000088881
ELK3	ENSG00000111145					ELF1	ENSG00000120690
ELK4	ENSG00000158711					ELF2	ENSG00000109381
ERF	ENSG00000105722					ELK3	ENSG00000111145
ERG	ENSG00000157554					ELK4	ENSG00000158711
ETS1	ENSG00000134954					ERF	ENSG00000105722
ETS2	ENSG00000157557					ERG	ENSG00000157554
ETV6	ENSG00000139083					ETS1	ENSG00000134954
GABPA	ENSG00000154727					ETS2	ENSG00000157557
FLYWCH1	ENSG00000059122					ETV6	ENSG00000139083
FOXJ2	ENSG00000065970					GABPA	ENSG00000154727
FOXJ3	ENSG00000198815					FLYWCH1	ENSG00000059122
FOXK1	ENSG00000164916					FOXJ2	ENSG00000065970
FOXK2	ENSG00000141568					FOXJ3	ENSG00000198815
FOXN2	ENSG00000170802					FOXK1	ENSG00000164916
FOXN3	ENSG00000053254					FOXK2	ENSG00000141568
FOXO1	ENSG00000150907					FOXN2	ENSG00000170802
FOXO3	ENSG00000118689					FOXN3	ENSG00000053254
FOXP1	ENSG00000114861					FOXO1	ENSG00000150907
FOXP4	ENSG00000137166					FOXO3	ENSG00000118689
GATAD2A	ENSG00000167491					FOXP1	ENSG00000114861
GATAD2B	ENSG00000143614					FOXP2	ENSG00000128573
TRPS1	ENSG00000104447					FOXP4	ENSG00000137166
ZGLP1	ENSG00000220201					GATAD2A	ENSG00000167491
TFCP2	ENSG00000135457					GATAD2B	ENSG00000143614
UBP1	ENSG00000153560					TRPS1	ENSG00000104447
GTF2I	ENSG00000077809					ZGLP1	ENSG00000220201
GTF2IRD1	ENSG00000006704					TFCP2	ENSG00000135457
GTF2IRD2	ENSG00000196275					UBP1	ENSG00000153560
GTF2IRD2B	ENSG00000174428					GTF2I	ENSG00000077809
BBX	ENSG00000114439					GTF2IRD1	ENSG00000006704
CIC	ENSG00000079432					GTF2IRD2	ENSG00000196275
HBP1	ENSG00000105856					GTF2IRD2B	ENSG00000174428
HMG20A	ENSG00000140382					BBX	ENSG00000114439
HMG20B	ENSG00000064961					CIC	ENSG00000079432
HMGN3	ENSG00000118418					HBP1	ENSG00000105856
SOX12	ENSG00000177732					HMG20A	ENSG00000140382
SOX13	ENSG00000143842					HMG20B	ENSG00000064961
SOX18	ENSG00000203883					HMGN3	ENSG00000118418
TCF7L1	ENSG00000152284					SOX12	ENSG00000177732
TCF7L2	ENSG00000148737					SOX13	ENSG00000143842
ADNP	ENSG00000101126					SOX17	ENSG00000164736
ADNP2	ENSG00000101544					SOX18	ENSG00000203883
HMBOX1	ENSG00000147421					TCF7L1	ENSG00000152284
HOXA7	ENSG00000122592					TCF7L2	ENSG00000148737
HOXA9	ENSG00000078399					ADNP	ENSG00000101126
HOXB2	ENSG00000173917					ADNP2	ENSG00000101544
HOXD8	ENSG00000175879					HLX	ENSG00000136630
LHX4	ENSG00000121454					HMBOX1	ENSG00000147421
LHX6	ENSG00000106852					HOXA1	ENSG00000105991
MEIS2	ENSG00000134138					HOXA2	ENSG00000105996
PBX2	ENSG00000204304					HOXA7	ENSG00000122592
PKNOX1	ENSG00000160199					HOXA9	ENSG00000078399
SIX5	ENSG00000177045					HOXB2	ENSG00000173917
TGIF1	ENSG00000177426					HOXD8	ENSG00000175879
TGIF2	ENSG00000118707					LHX4	ENSG00000121454
VAX2	ENSG00000116035					PBX2	ENSG00000204304
ZHX1	ENSG00000165156					PKNOX1	ENSG00000160199
ZHX2	ENSG00000178764					PKNOX2	ENSG00000165495
ZHX3	ENSG00000174306					SIX5	ENSG00000177045
POU2F1	ENSG00000143190					TGIF1	ENSG00000177426
POU6F1	ENSG00000184271					TGIF2	ENSG00000118707
HSF1	ENSG00000185122					VAX2	ENSG00000116035
HSF2	ENSG00000025156					ZHX1	ENSG00000165156
HSF4	ENSG00000102878					ZHX2	ENSG00000178764
IRF2	ENSG00000168310					ZHX3	ENSG00000174306
IRF7	ENSG00000185507					POU2F1	ENSG00000143190
IRF9	ENSG00000213928					POU6F1	ENSG00000184271
MSANTD3	ENSG00000066697					HSF1	ENSG00000185122
NAIF1	ENSG00000171169					HSF2	ENSG00000025156
MEF2A	ENSG00000068305					HSF4	ENSG00000102878
MEF2B	ENSG00000213999					IRF2	ENSG00000168310
MEF2C	ENSG00000081189					IRF7	ENSG00000185507
MEF2D	ENSG00000116604					IRF9	ENSG00000213928
SRF	ENSG00000112658					MSANTD3	ENSG00000066697
BAZ2B	ENSG00000123636					NAIF1	ENSG00000171169
MBD2	ENSG00000134046					MEF2A	ENSG00000068305
MBD3	ENSG00000071655					MEF2B	ENSG00000213999
MBD4	ENSG00000129071					MEF2D	ENSG00000116604
MBD6	ENSG00000166987					SRF	ENSG00000112658
PIN1	ENSG00000127445					BAZ2B	ENSG00000123636
SETDB1	ENSG00000143379					MBD2	ENSG00000134046
SETDB2	ENSG00000136169					MBD3	ENSG00000071655
BAZ2A	ENSG00000076108					MBD4	ENSG00000129071
MBD1	ENSG00000141644					MBD6	ENSG00000166987
CDC5L	ENSG00000096401					PIN1	ENSG00000127445
DMTF1	ENSG00000135164					SETDB1	ENSG00000143379
MSANTD4	ENSG00000170903					SETDB2	ENSG00000136169
MYPOP	ENSG00000176182					BAZ2A	ENSG00000076108
MYSM1	ENSG00000162601					MBD1	ENSG00000141644
SNAPC4	ENSG00000165684					CDC5L	ENSG00000096401
TERF1	ENSG00000147601					DMTF1	ENSG00000135164
TERF2	ENSG00000132604					MSANTD4	ENSG00000170903
TTF1	ENSG00000125482					MYPOP	ENSG00000176182
ZZZ3	ENSG00000036549					MYSM1	ENSG00000162601
NFX1	ENSG00000086102					SNAPC4	ENSG00000165684
NFXL1	ENSG00000170448					TERF1	ENSG00000147601
ESRRA	ENSG00000173153					TERF2	ENSG00000132604
NR1D2	ENSG00000174738					TTF1	ENSG00000125482
NR1H2	ENSG00000131408					ZZZ3	ENSG00000036549
NR1H3	ENSG00000025434					NFX1	ENSG00000086102
NR2C1	ENSG00000120798					NFXL1	ENSG00000170448
NR2C2	ENSG00000177463					ESRRA	ENSG00000173153
NR2E3	ENSG00000031544					NR1D2	ENSG00000174738
NR2F6	ENSG00000160113					NR1H2	ENSG00000131408
NR3C1	ENSG00000113580					NR1H3	ENSG00000025434
NR3C2	ENSG00000151623					NR2C1	ENSG00000120798
PPARA	ENSG00000186951					NR2C2	ENSG00000177463
PPARD	ENSG00000112033					NR2E3	ENSG00000031544
RARA	ENSG00000131759					NR2F6	ENSG00000160113
RARB	ENSG00000077092					NR3C1	ENSG00000113580
RXRA	ENSG00000186350					NR3C2	ENSG00000151623
RXRB	ENSG00000204231					PPARA	ENSG00000186951
THRA	ENSG00000126351					PPARD	ENSG00000112033
THRB	ENSG00000151090					RARA	ENSG00000131759
BPTF	ENSG00000171634					RARB	ENSG00000077092
BRF2	ENSG00000104221					RXRA	ENSG00000186350
CARF	ENSG00000138380					RXRB	ENSG00000204231
CC2D1A	ENSG00000132024					THRA	ENSG00000126351
CEBPZ	ENSG00000115816					THRB	ENSG00000151090
CENPT	ENSG00000102901					BPTF	ENSG00000171634
CGGBP1	ENSG00000163320					BRF2	ENSG00000104221
CHCHD3	ENSG00000106554					CARF	ENSG00000138380
CSRNP1	ENSG00000144655					CC2D1A	ENSG00000132024
CSRNP2	ENSG00000110925					CEBPZ	ENSG00000115816
DACH1	ENSG00000165659					CENPT	ENSG00000102901
DR1	ENSG00000117505					CGGBP1	ENSG00000163320
DRAP1	ENSG00000175550					CHCHD3	ENSG00000106554
GPBP1L1	ENSG00000159592					CSRNP1	ENSG00000144655
GTF2B	ENSG00000137947					CSRNP2	ENSG00000110925
MTF2	ENSG00000143033					DACH1	ENSG00000165659
NACC2	ENSG00000148411					DR1	ENSG00000117505
NFYB	ENSG00000120837					DRAP1	ENSG00000175550
NFYC	ENSG00000066136					GPBP1L1	ENSG00000159592
NRF1	ENSG00000106459					GTF2B	ENSG00000137947
PA2G4	ENSG00000170515					MTF2	ENSG00000143033
PCGF2	ENSG00000056661					NACC2	ENSG00000148411
PCGF6	ENSG00000156374					NFYB	ENSG00000120837
PHF1	ENSG00000112511					NFYC	ENSG00000066136
PHF19	ENSG00000119403					NRF1	ENSG00000106459
PLSCR1	ENSG00000188313					PA2G4	ENSG00000170515
PREB	ENSG00000138073					PCGF2	ENSG00000056661
PURA	ENSG00000185129					PCGF6	ENSG00000156374
PURB	ENSG00000146676					PHF1	ENSG00000112511
REXO4	ENSG00000148300					PHF19	ENSG00000119403
SAFB	ENSG00000160633					PLSCR1	ENSG00000188313
SAFB2	ENSG00000130254					PREB	ENSG00000138073
SCMH1	ENSG00000010803					PURA	ENSG00000185129
SKI	ENSG00000157933					PURB	ENSG00000146676
SKIL	ENSG00000136603					REXO4	ENSG00000148300
SKOR1	ENSG00000188779					SAFB	ENSG00000160633
SMYD3	ENSG00000185420					SAFB2	ENSG00000130254
SNAPC2	ENSG00000104976					SCMH1	ENSG00000010803
SNAPC5	ENSG00000174446					SKI	ENSG00000157933
SON	ENSG00000159140					SKIL	ENSG00000136603
SPEN	ENSG00000065526					SKOR1	ENSG00000188779
TCF20	ENSG00000100207					SMYD3	ENSG00000185420
TET2	ENSG00000168769					SNAPC2	ENSG00000104976
THYN1	ENSG00000151500					SNAPC5	ENSG00000174446
TMF1	ENSG00000144747					SON	ENSG00000159140
TOPORS	ENSG00000197579					SPEN	ENSG00000065526
TSC22D1	ENSG00000102804					TCF20	ENSG00000100207
XPA	ENSG00000136936					TET2	ENSG00000168769
TP53	ENSG00000141510					THYN1	ENSG00000151500
LCOR	ENSG00000196233					TMF1	ENSG00000144747
LCORL	ENSG00000178177					TOPORS	ENSG00000197579
PROX2	ENSG00000119608					TSC22D1	ENSG00000102804
NFAT5	ENSG00000102908					XPA	ENSG00000136936
NFATC1	ENSG00000131196					TP53	ENSG00000141510
NFATC2	ENSG00000101096					LCOR	ENSG00000196233
NFATC3	ENSG00000072736					LCORL	ENSG00000178177
NFATC4	ENSG00000100968					PROX2	ENSG00000119608
NFKB1	ENSG00000109320					NFAT5	ENSG00000102908
NFKB2	ENSG00000077150					NFATC1	ENSG00000131196
REL	ENSG00000162924					NFATC2	ENSG00000101096
RELA	ENSG00000173039					NFATC3	ENSG00000072736
RELB	ENSG00000104856					NFATC4	ENSG00000100968
RFX3	ENSG00000080298					NFKB1	ENSG00000109320
RFX5	ENSG00000143390					NFKB2	ENSG00000077150
RFX7	ENSG00000181827					REL	ENSG00000162924
GMEB1	ENSG00000162419					RELA	ENSG00000173039
GMEB2	ENSG00000101216					RELB	ENSG00000104856
SP100	ENSG00000067066					RFX3	ENSG00000080298
SP110	ENSG00000135899					RFX5	ENSG00000143390
SP140L	ENSG00000185404					RFX7	ENSG00000181827
NFIA	ENSG00000162599					GMEB1	ENSG00000162419
NFIB	ENSG00000147862					GMEB2	ENSG00000101216
NFIC	ENSG00000141905					SP100	ENSG00000067066
NFIX	ENSG00000008441					SP110	ENSG00000135899
SMAD1	ENSG00000170365					SP140L	ENSG00000185404
SMAD3	ENSG00000166949					NFIA	ENSG00000162599
SMAD4	ENSG00000141646					NFIB	ENSG00000147862
SMAD5	ENSG00000113658					NFIC	ENSG00000141905
STAT1	ENSG00000115415					NFIX	ENSG00000008441
STAT3	ENSG00000168610					SMAD1	ENSG00000170365
STAT5A	ENSG00000126561					SMAD3	ENSG00000166949
STAT5B	ENSG00000173757					SMAD4	ENSG00000141646
STAT6	ENSG00000166888					SMAD5	ENSG00000113658
MGA	ENSG00000174197					STAT1	ENSG00000115415
TBP	ENSG00000112592					STAT3	ENSG00000168610
LIN54	ENSG00000189308					STAT5A	ENSG00000126561
TEAD1	ENSG00000187079					STAT5B	ENSG00000173757
TEAD2	ENSG00000074219					STAT6	ENSG00000166888
TEAD3	ENSG00000007866					MGA	ENSG00000174197
THAP1	ENSG00000131931					TBX6	ENSG00000149922
THAP10	ENSG00000129028					TBP	ENSG00000112592
THAP11	ENSG00000168286					LIN54	ENSG00000189308
THAP2	ENSG00000173451					TEAD1	ENSG00000187079
THAP3	ENSG00000041988					TEAD2	ENSG00000074219
THAP4	ENSG00000176946					TEAD3	ENSG00000007866
THAP5	ENSG00000177683					THAP1	ENSG00000131931
THAP7	ENSG00000184436					THAP10	ENSG00000129028
THAP8	ENSG00000161277					THAP11	ENSG00000168286
						THAP2	ENSG00000173451
						THAP3	ENSG00000041988
						THAP4	ENSG00000176946
						THAP5	ENSG00000177683
						THAP7	ENSG00000184436
						THAP8	ENSG00000161277
