# Supplementary figures and images for: Human genetic analyses of organelles highlight the nucleus in age-related trait heritability
Source: eLife journal article supplement (doi:10.7554/elife.68610), 2021-09-01

Parental Lifespan

First Morbidity Hazard

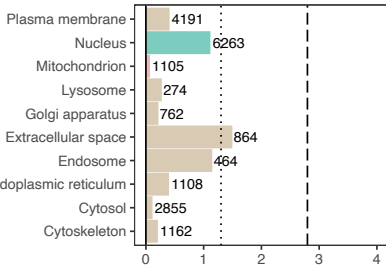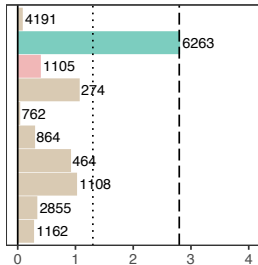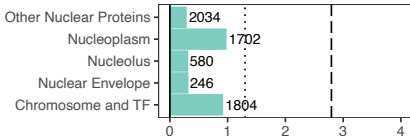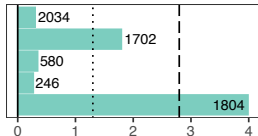 $-\log_{10}(\text{Coefficient P-value})$

Supplement: supp [file elife-68610-supp-v1.zip]

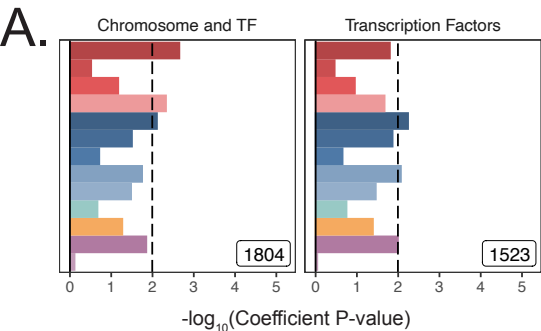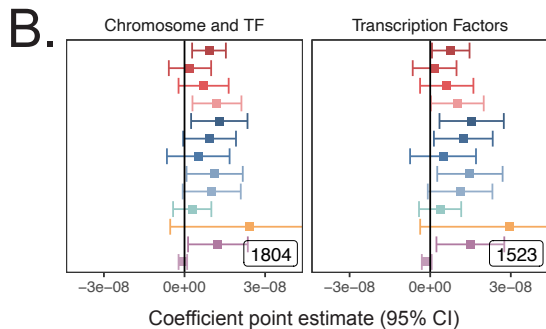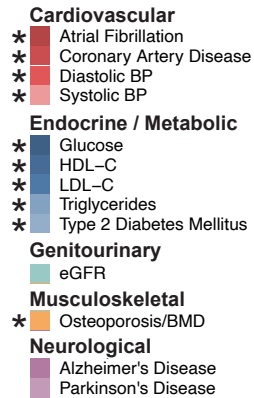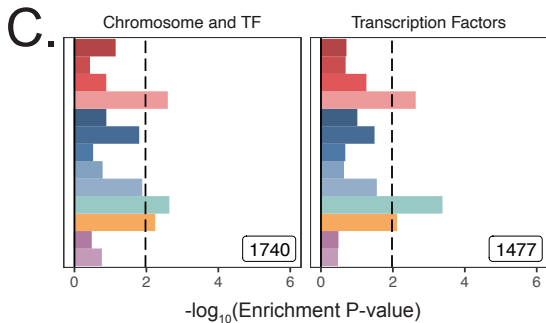

Supplement: supp [file elife-68610-supp-v1.zip]

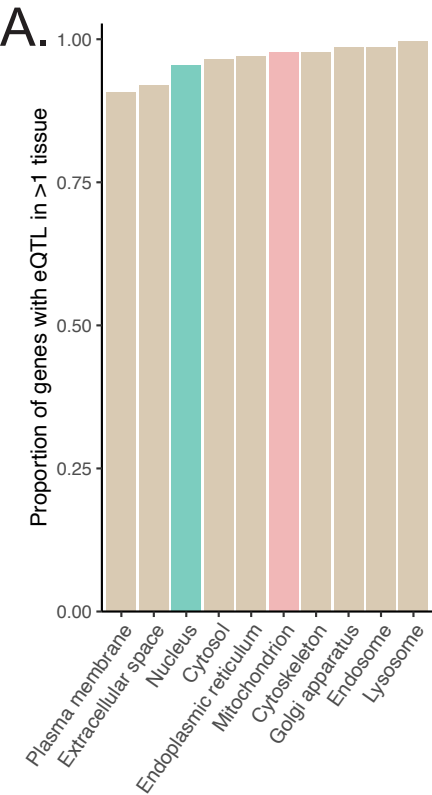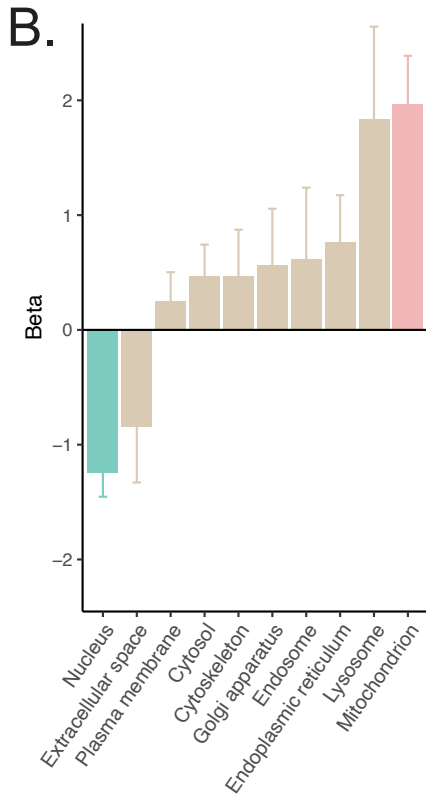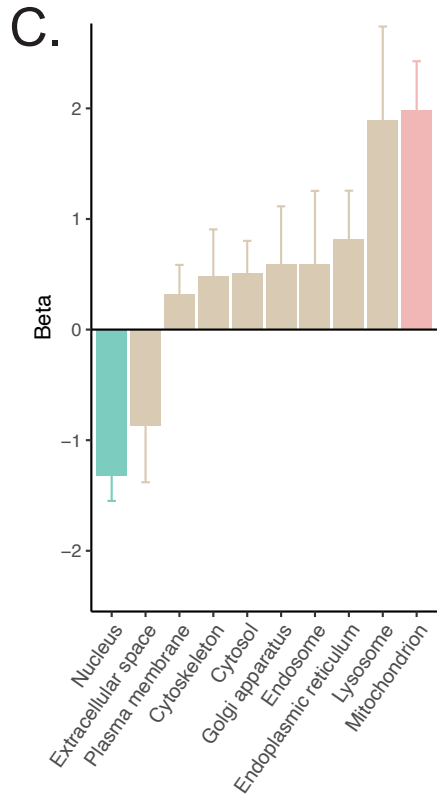

Supplement: supp [file elife-68610-supp-v1.zip]

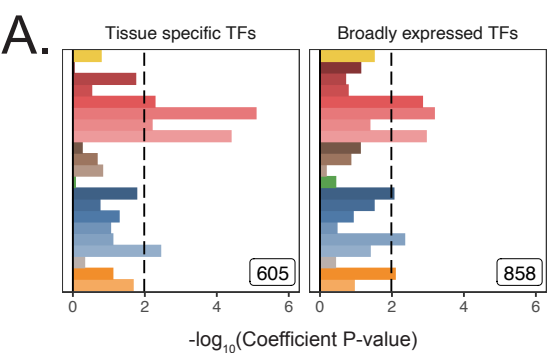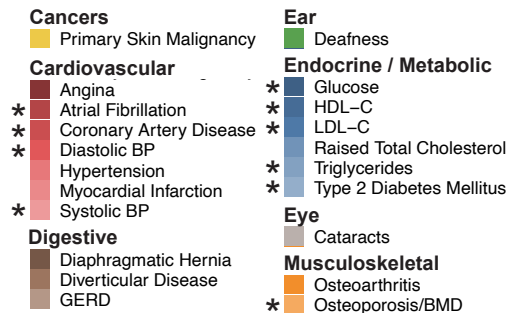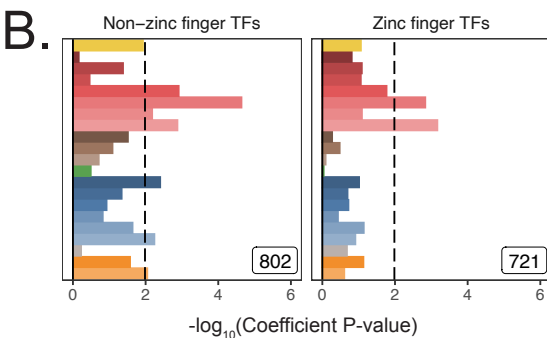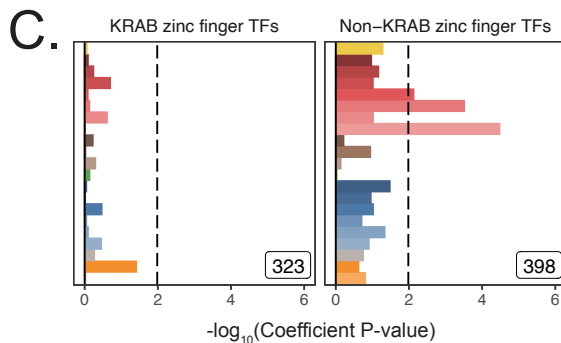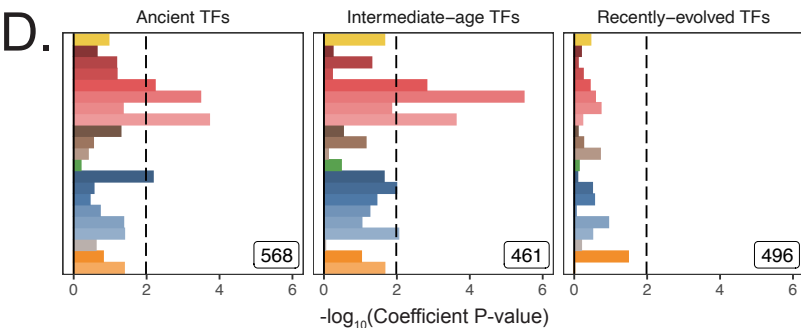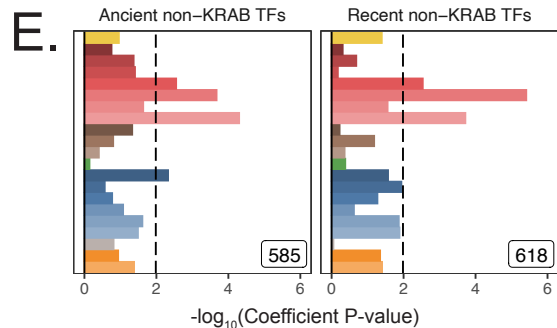

Supplement: supp [file elife-68610-supp-v1.zip]

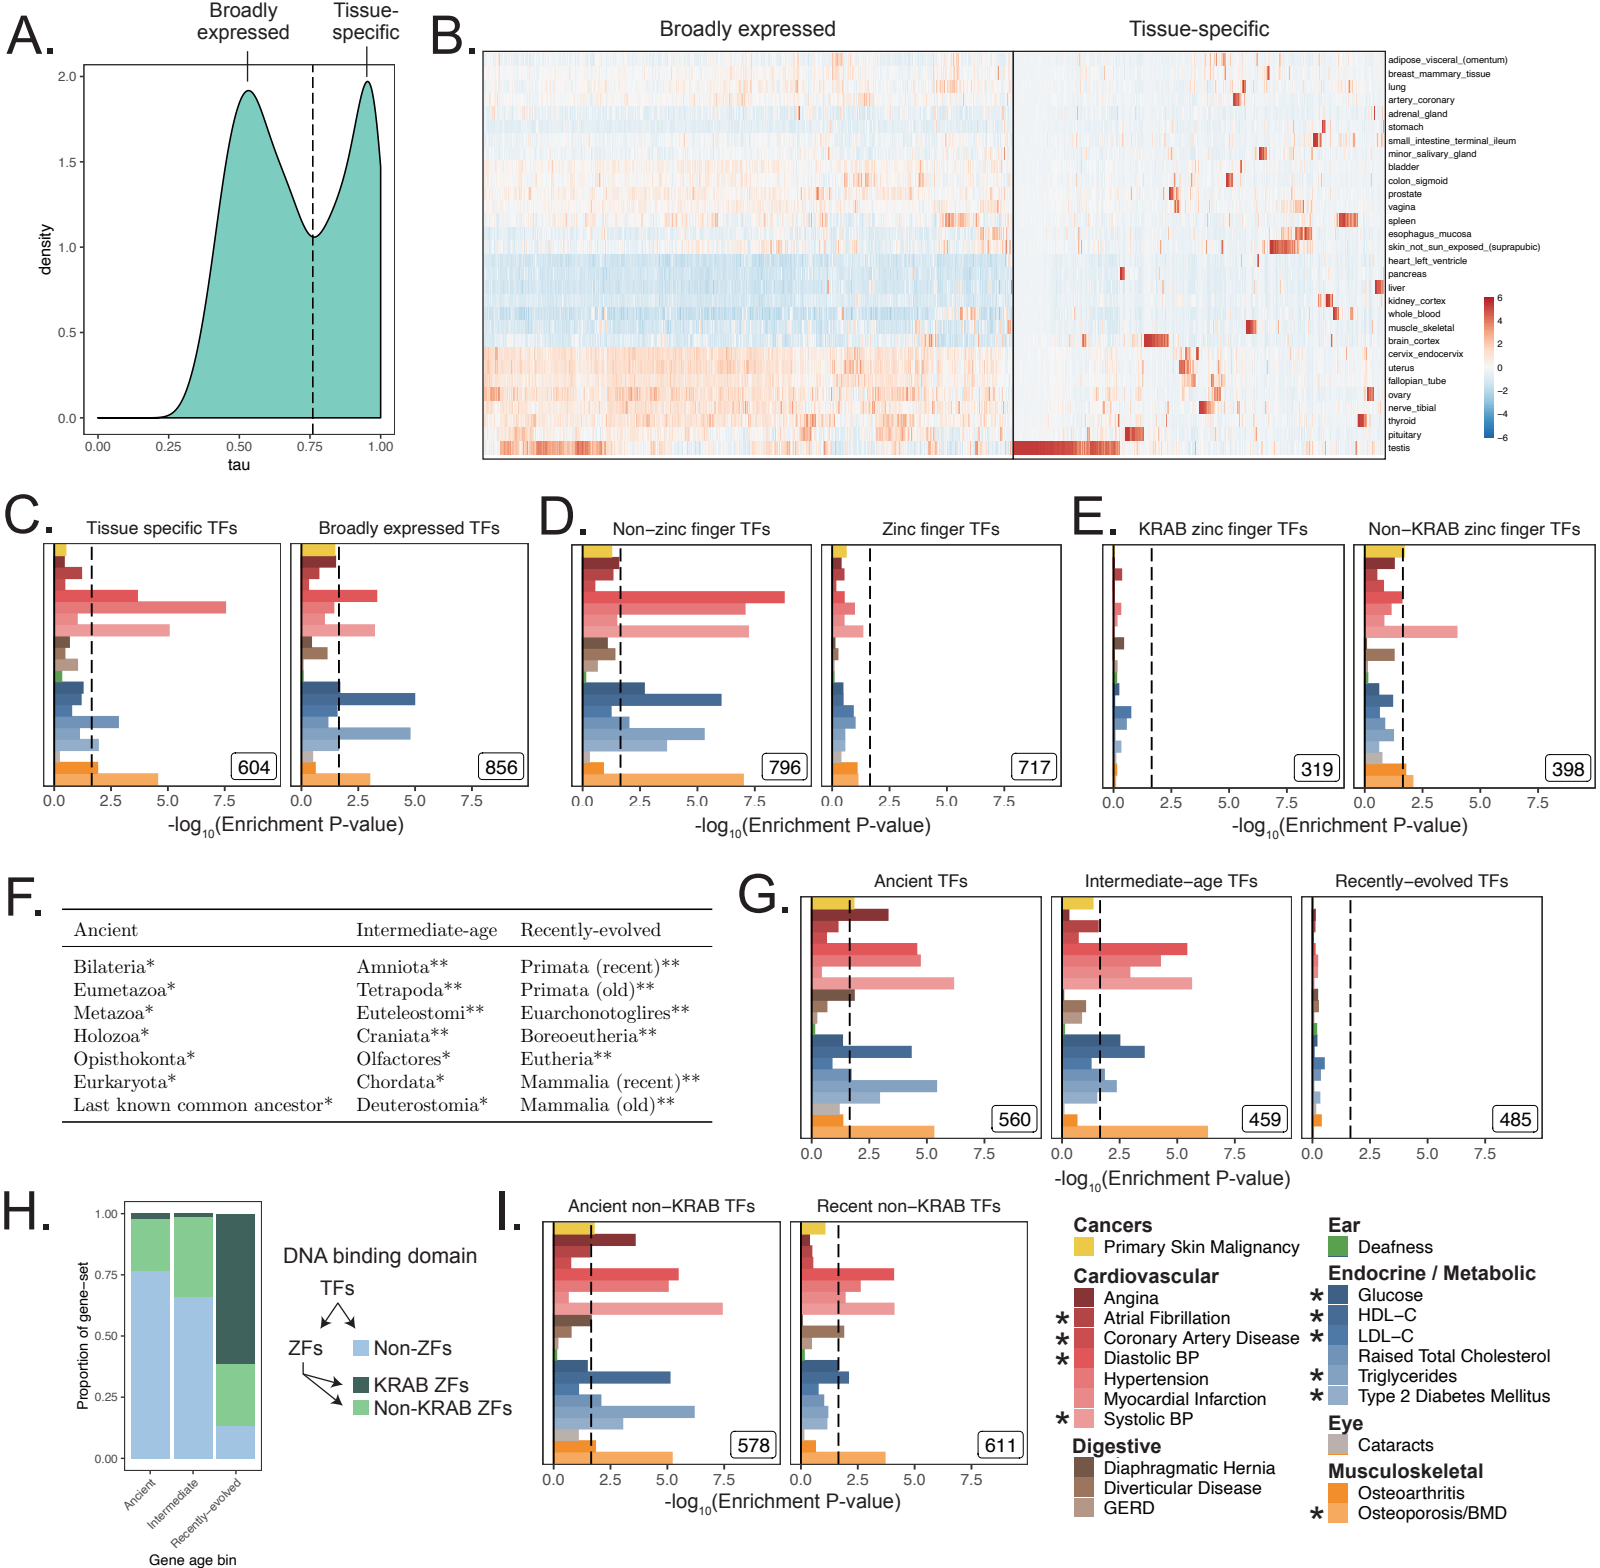

Supplement: supp [file elife-68610-supp-v1.zip]

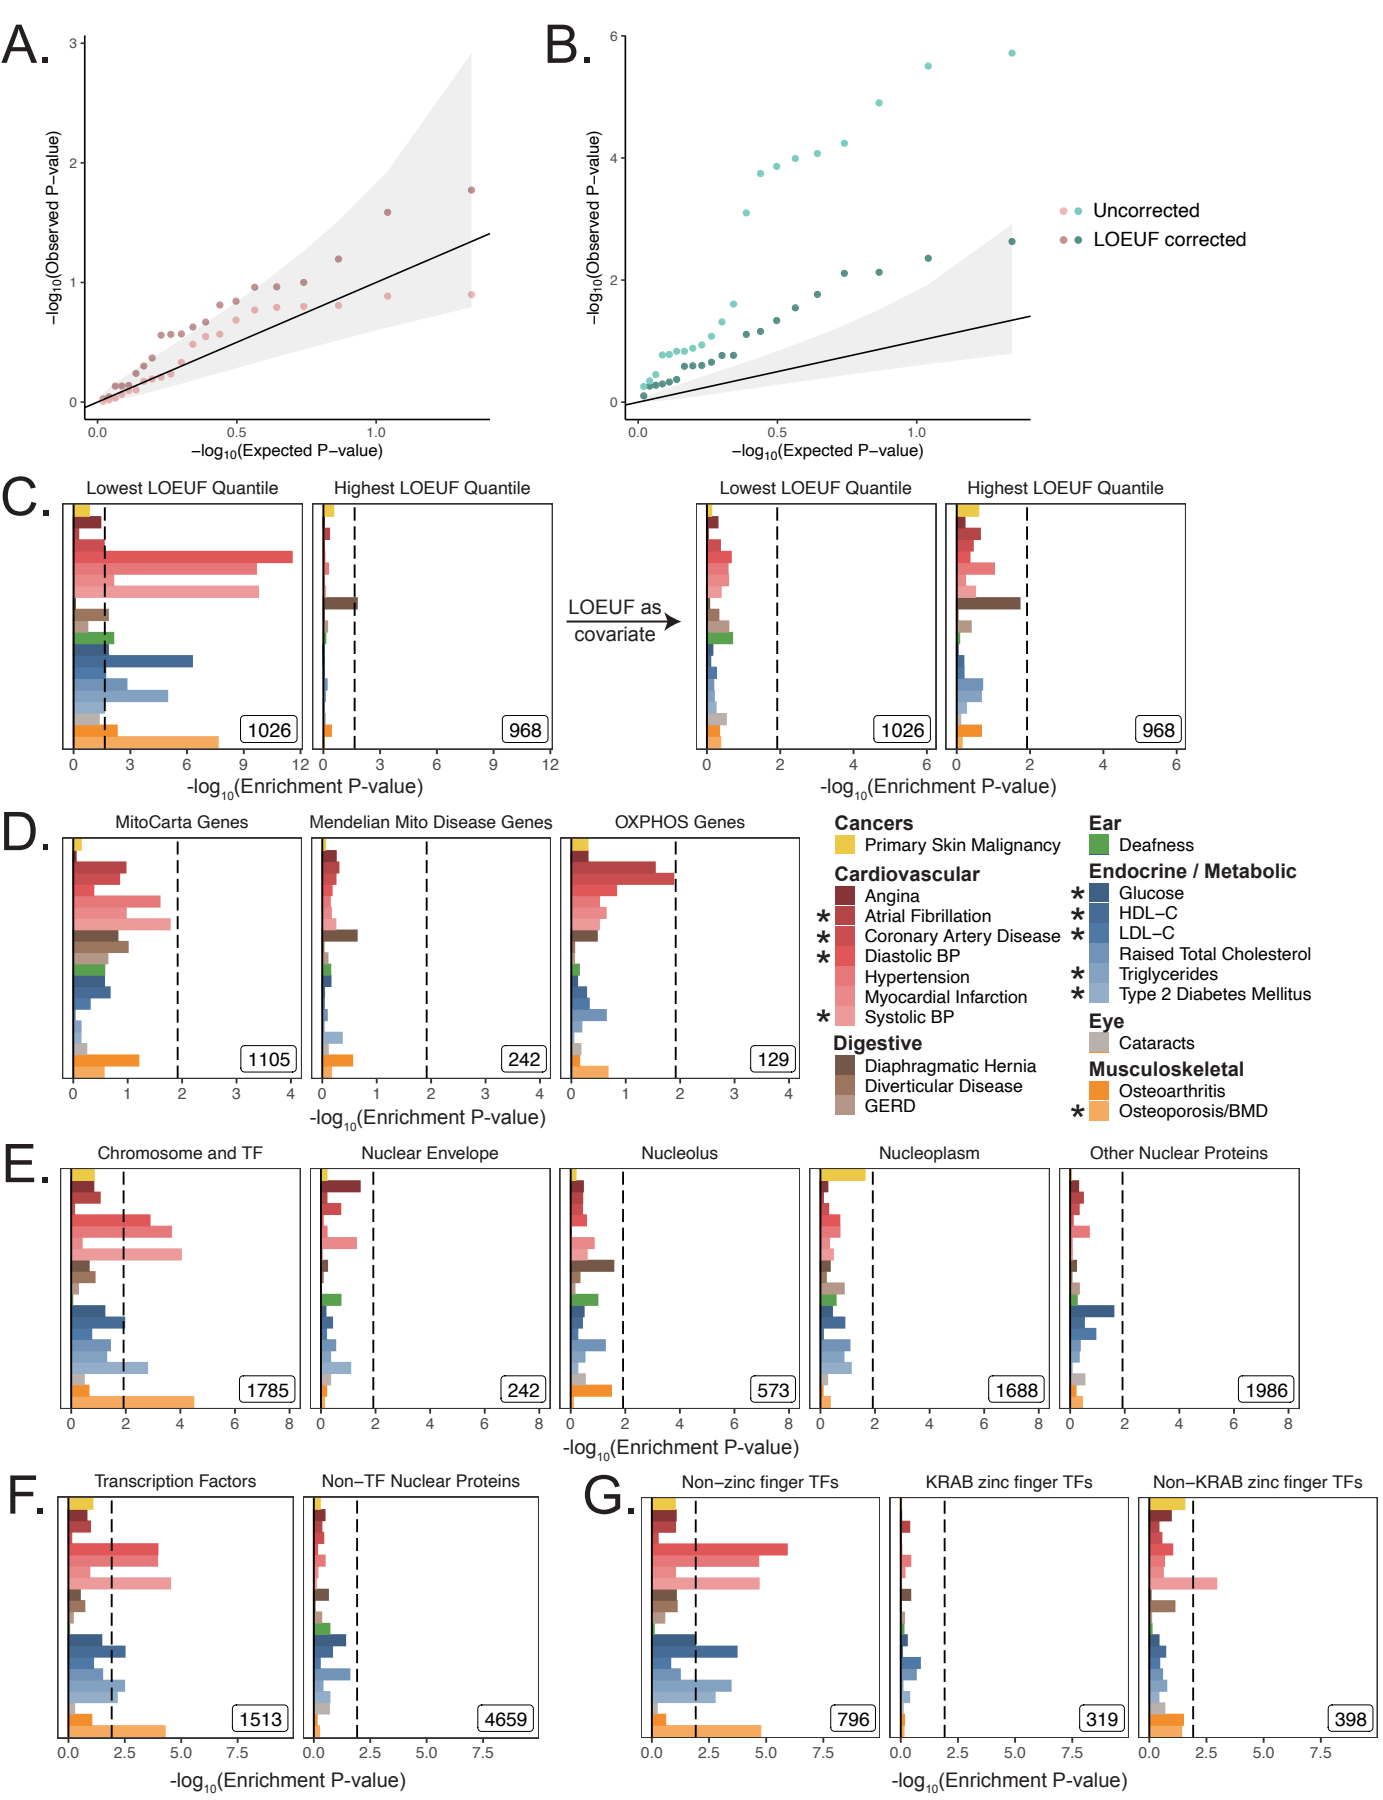

Supplement: supp [file elife-68610-supp-v1.zip]

A.

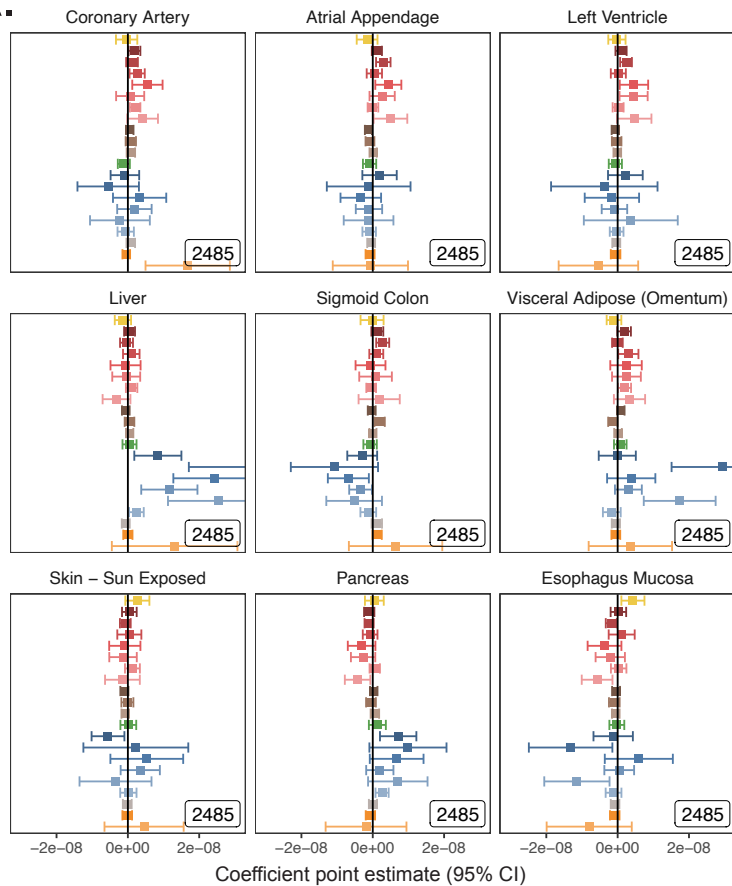

B.

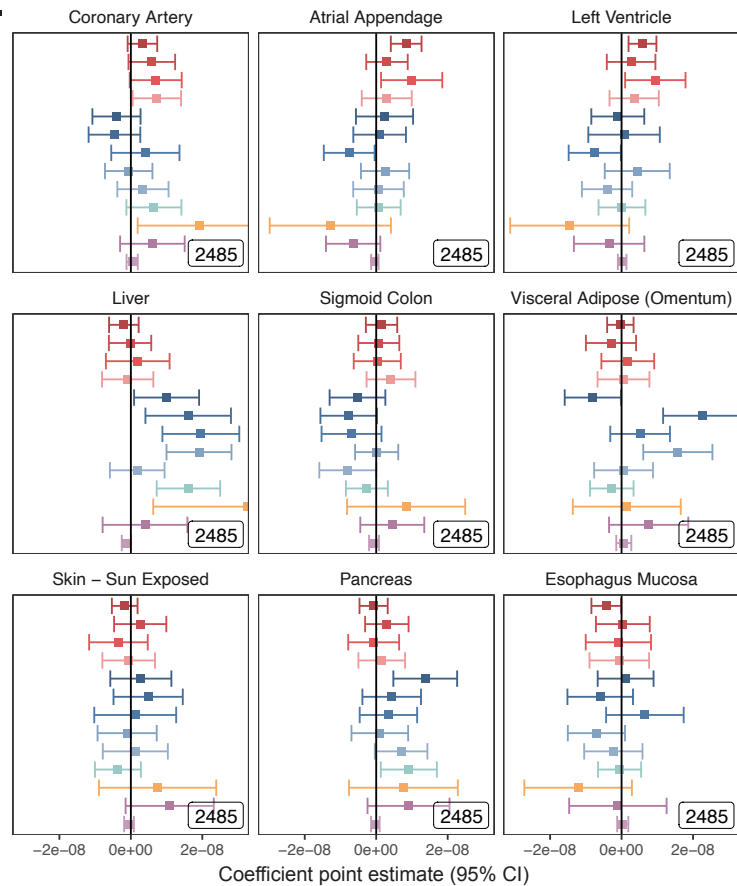

Supplement: supp [file elife-68610-supp-v1.zip]

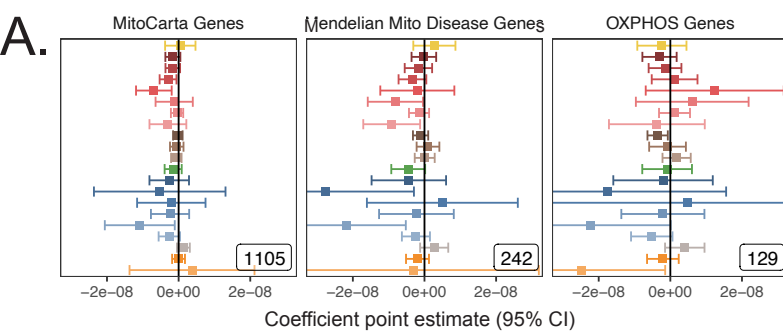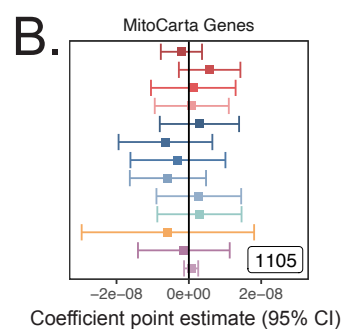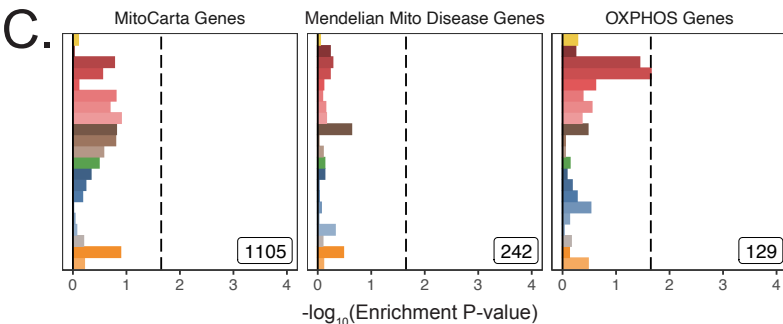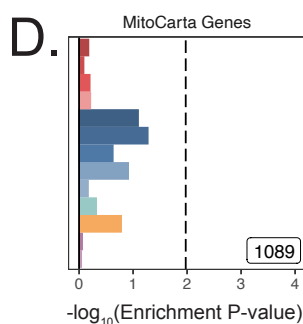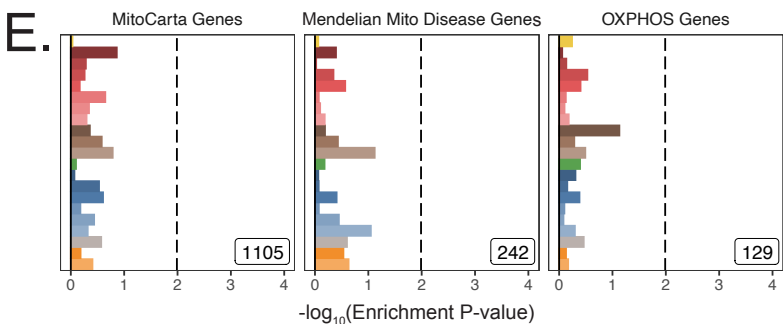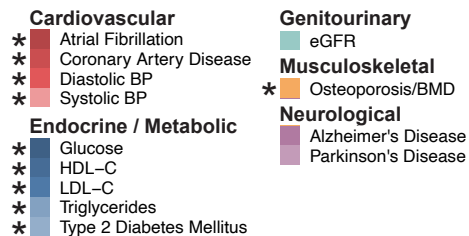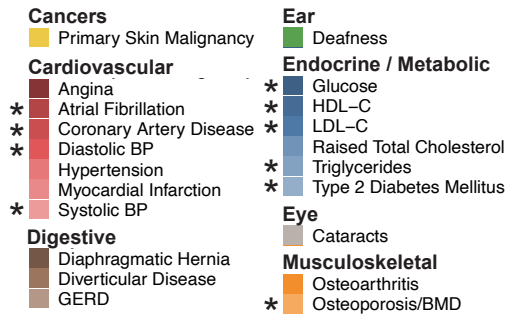

Supplement: supp [file elife-68610-supp-v1.zip]

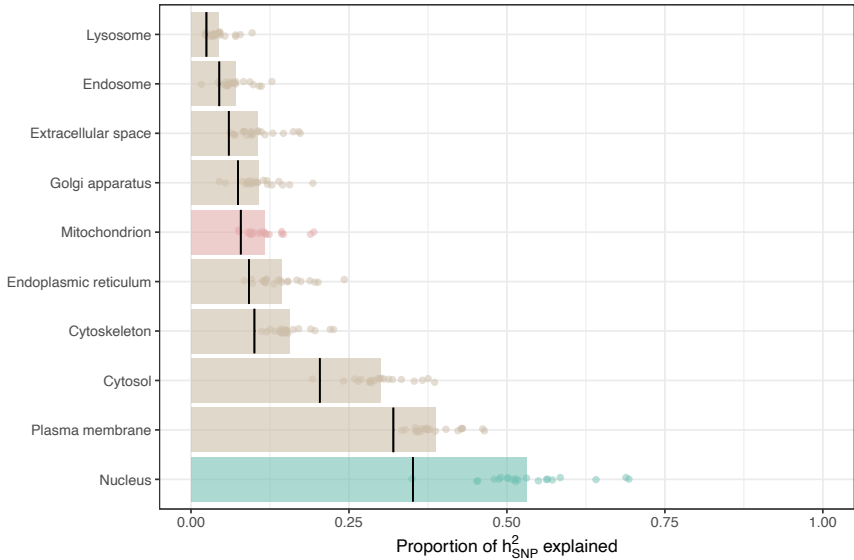

Supplement: supp [file elife-68610-supp-v1.zip]

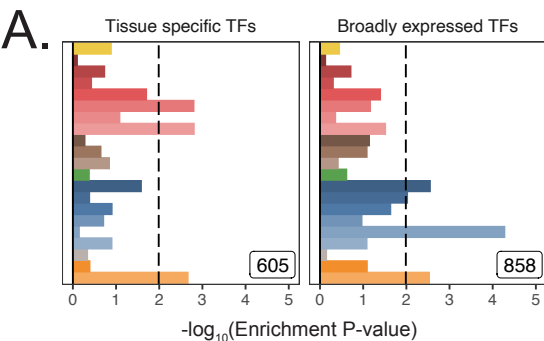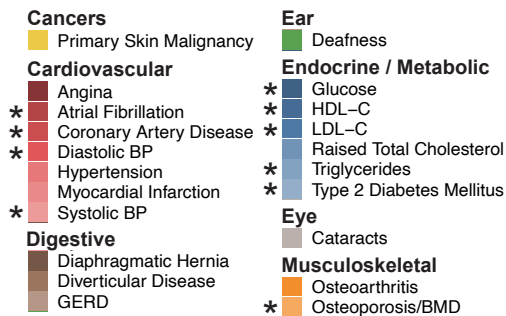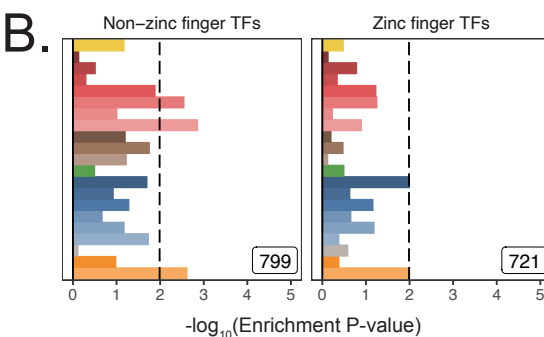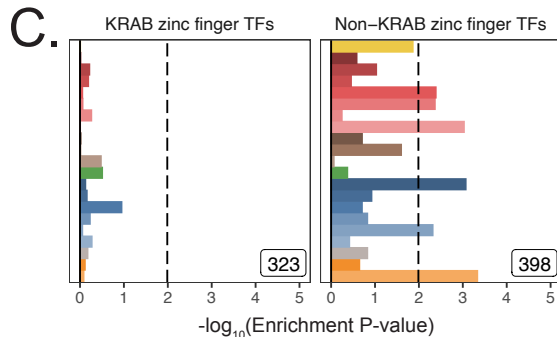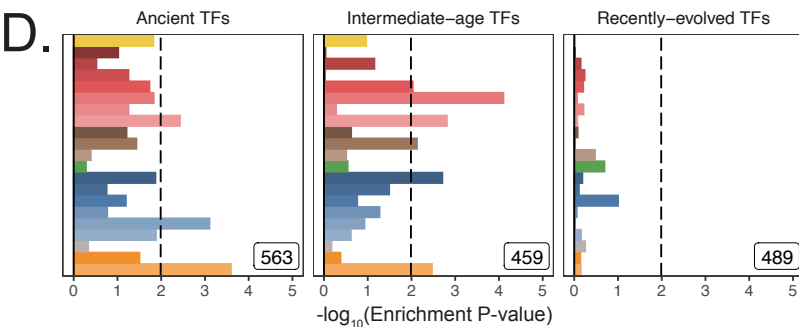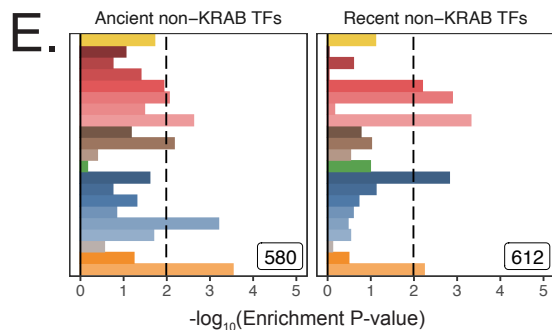

Supplement: supp [file elife-68610-supp-v1.zip]

A.

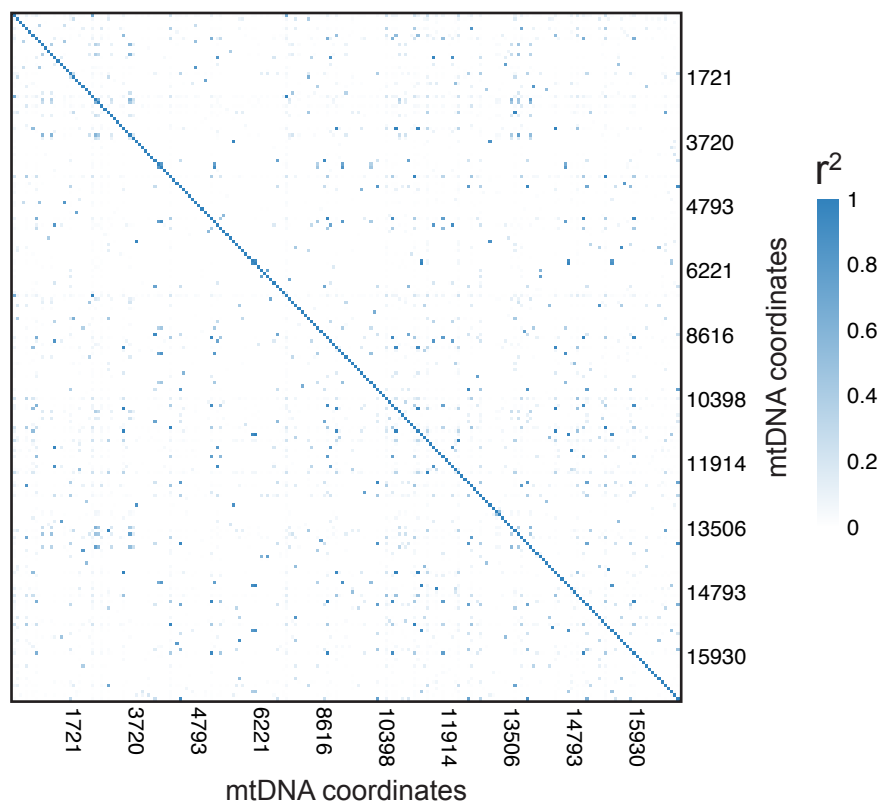

B.

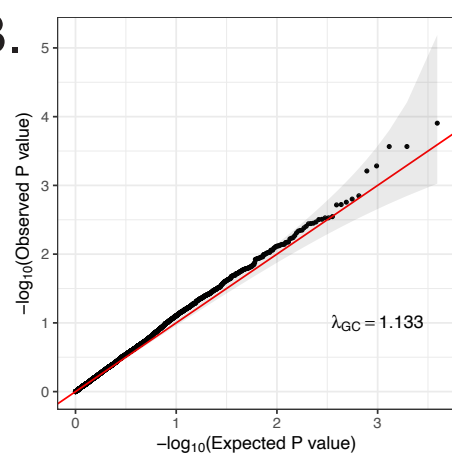

C.

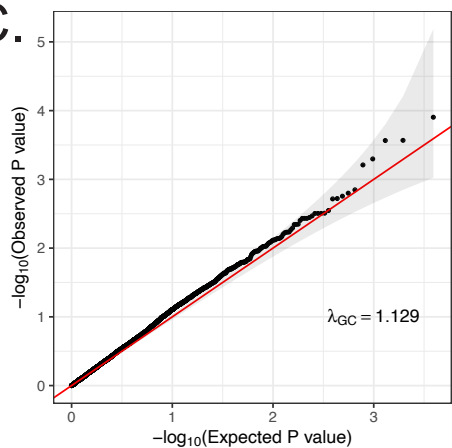

E.

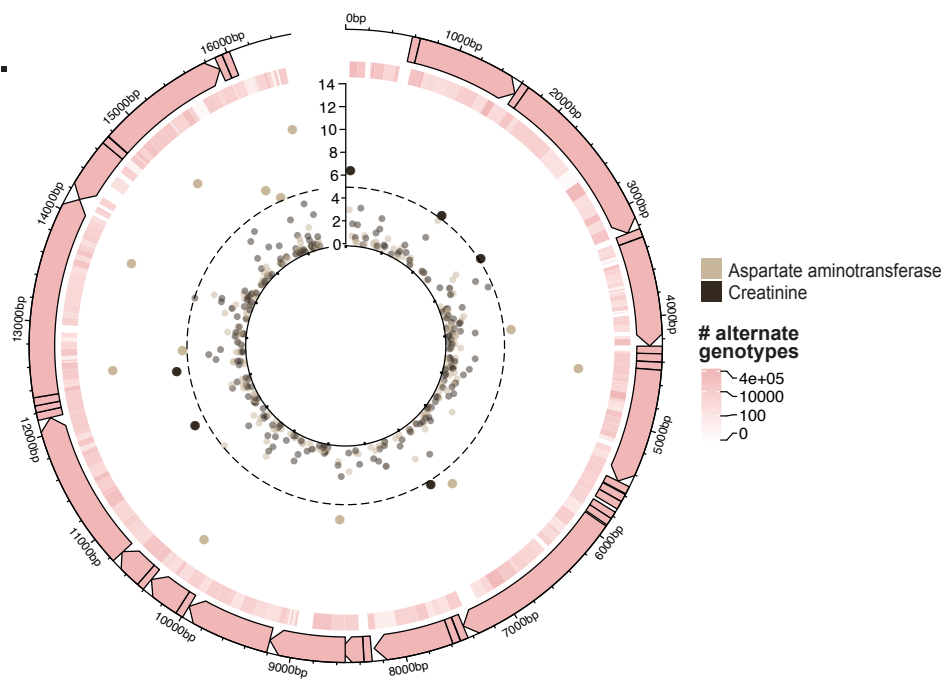

D.

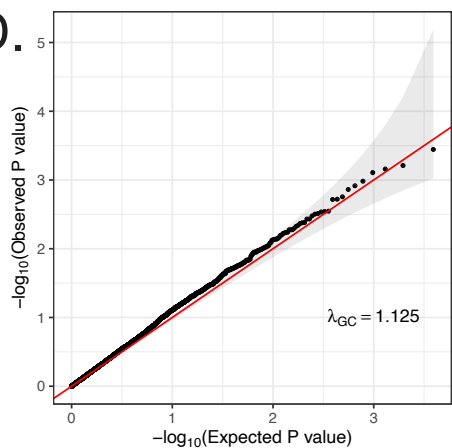

Supplement: supp [file elife-68610-supp-v1.zip]

A.

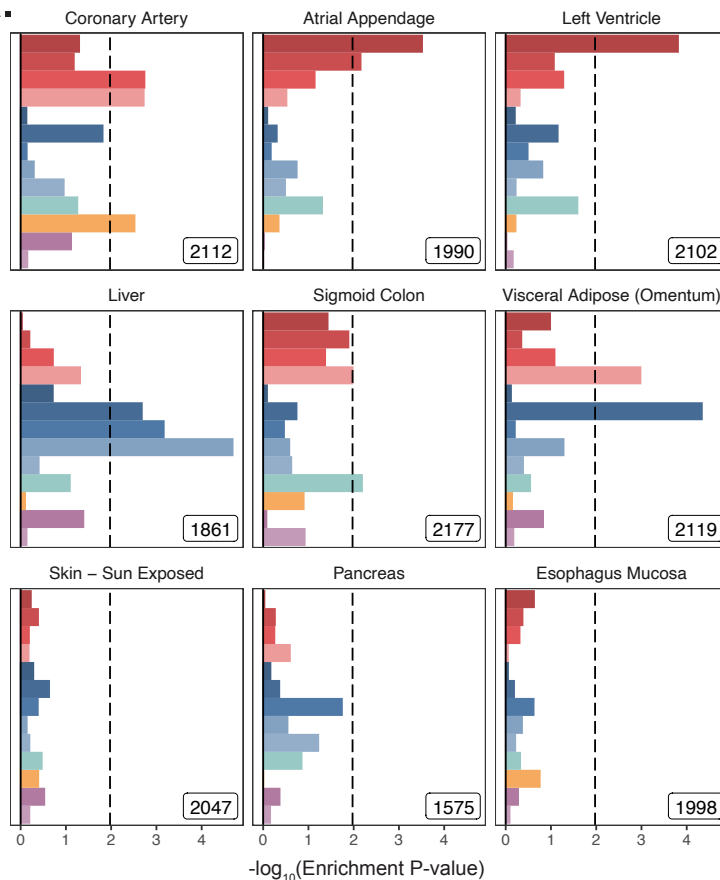

B.

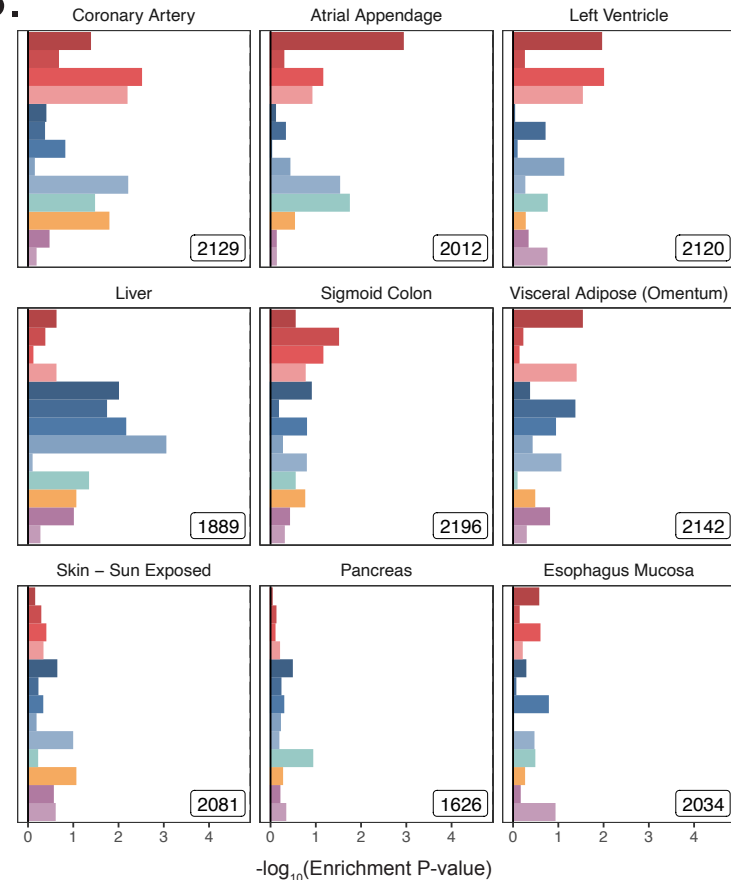

Supplement: supp [file elife-68610-supp-v1.zip]

A.

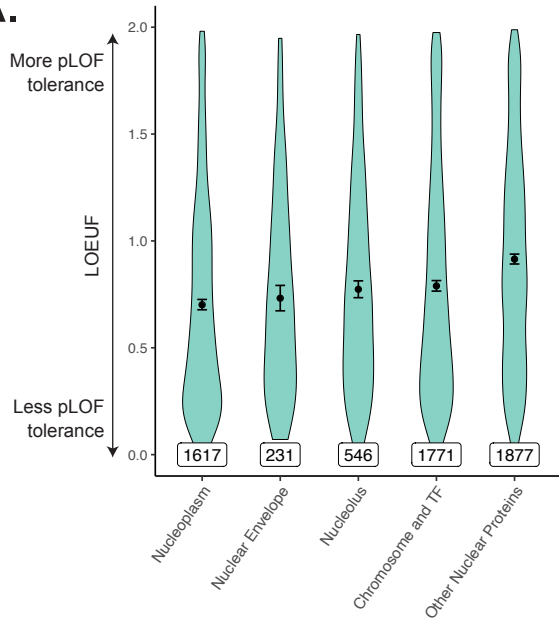

B.

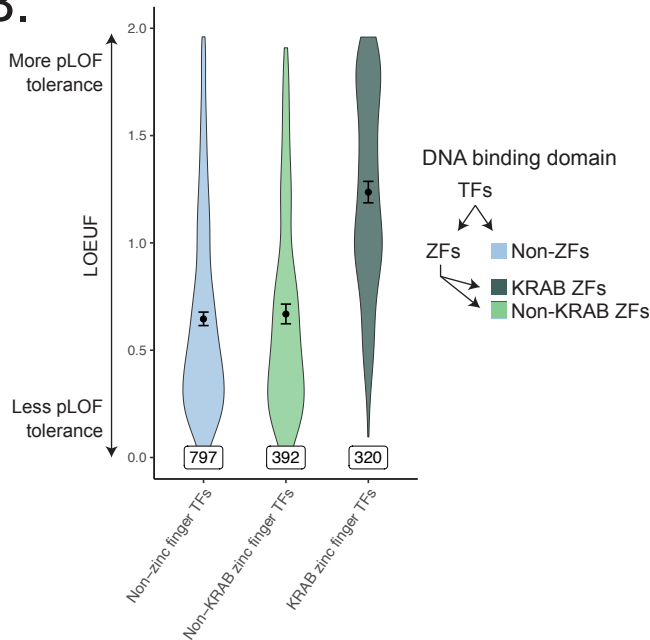

Supplement: supp [file elife-68610-supp-v1.zip]

A.

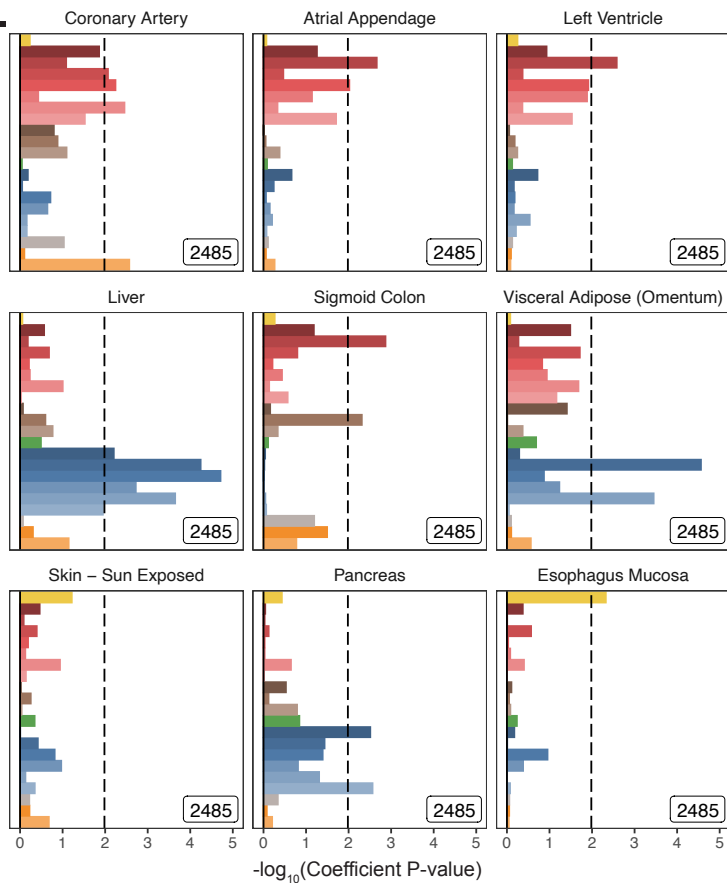

B.

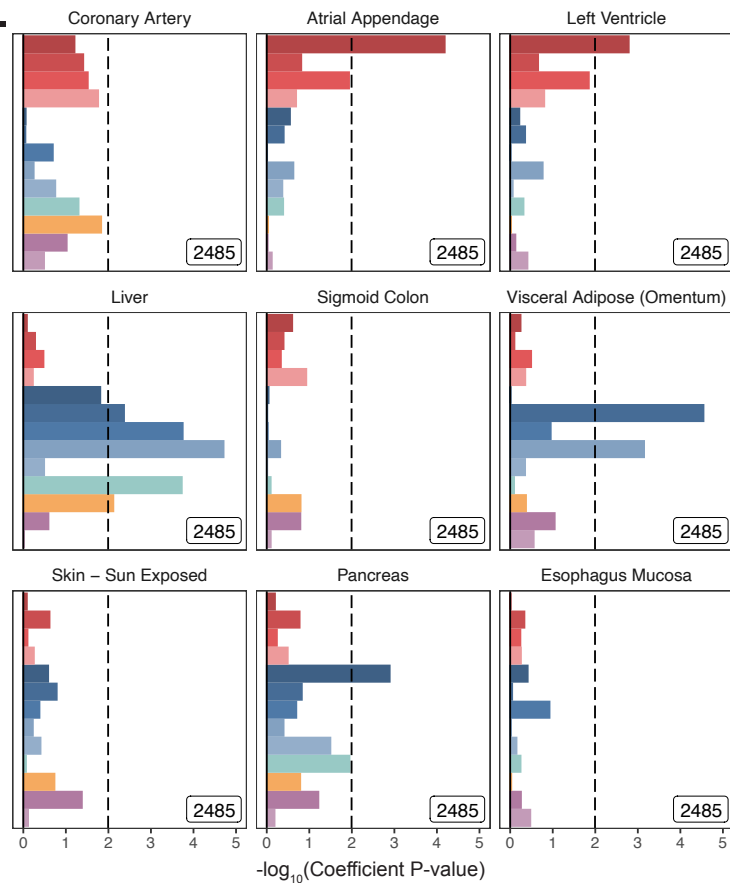

Supplement: supp [file elife-68610-supp-v1.zip]

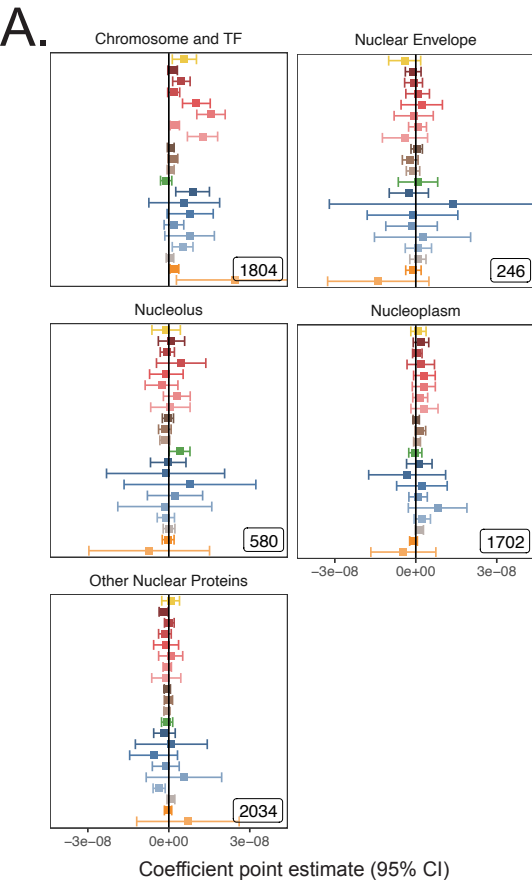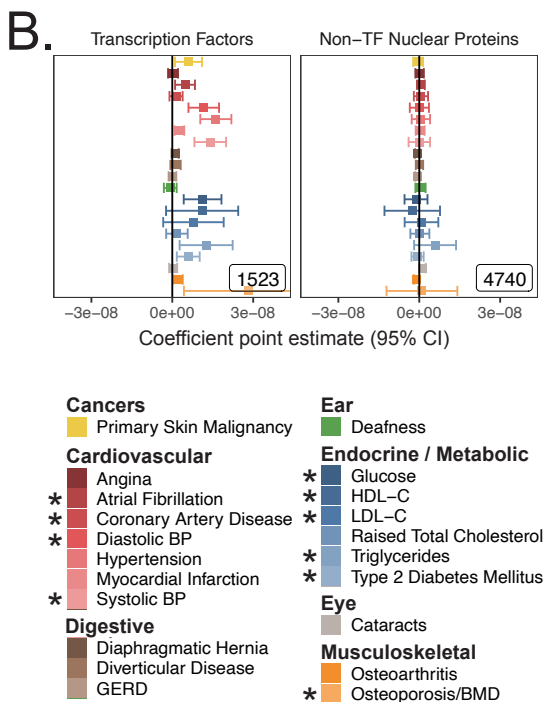

Supplement: supp [file elife-68610-supp-v1.zip]

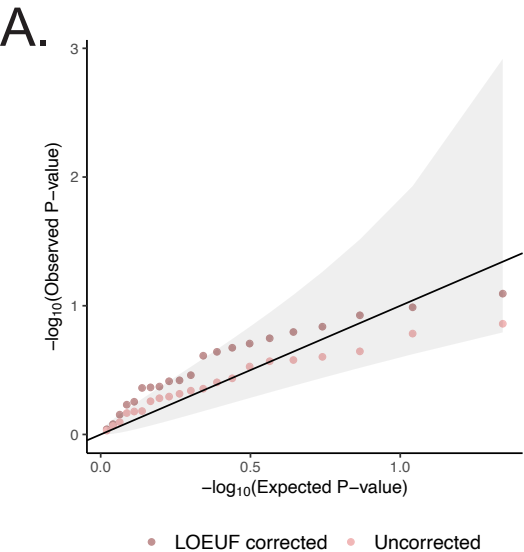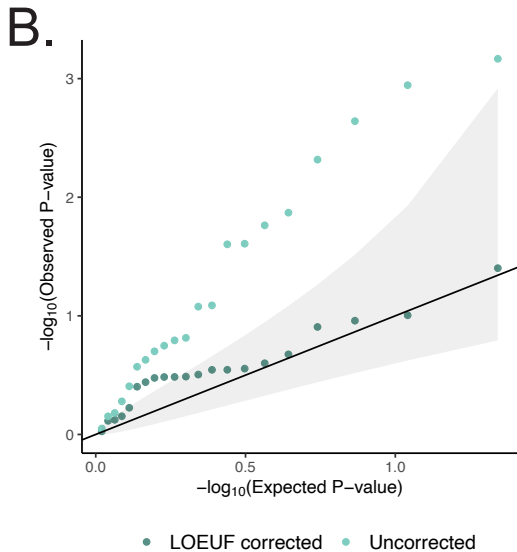

Supplement: supp [file elife-68610-supp-v1.zip]
